# Supplementary material for: Copper-catalyzed asymmetric cyclization of alkenyl diynes: method development and new mechanistic insights
Source: PubMed Central journal article supplement — Chem Sci. 2021 Jun 11;12(27):9466–74. doi: 10.1039/d1sc02773e (PMC8278876; doi:10.1039/d1sc02773e), 2021-06-11
Supplement: SC-012-D1SC02773E-s001.pdf [file SC-012-D1SC02773E-s001.pdf]

Supporting Information

**Copper-catalyzed asymmetric cyclization of alkenyl diynes: method development  
and new mechanistic insights**

Xin-Qi Zhu,<sup>#</sup> Pan Hong,<sup>#</sup> Yan-Xin Zheng, Ying-Ying Zhen, Feng-Lin Hong, Xin Lu\* and  
Long-Wu Ye\*

State Key Laboratory of Physical Chemistry of Solid Surfaces, Key Laboratory of  
Chemical Biology of Fujian Province, and College of Chemistry and Chemical  
Engineering, Xiamen University, Xiamen 361005, China  
E-mail: [longwuye@xmu.edu.cn](mailto:longwuye@xmu.edu.cn); [xinlu@xmu.edu.cn](mailto:xinlu@xmu.edu.cn)

| <b>Content</b>                                              | <b>Page Number</b> |
|-------------------------------------------------------------|--------------------|
| <b>General</b>                                              | 2                  |
| <b>More Reaction Condition, Scope and Mechanism Studies</b> | 3                  |
| <b>Preparation of Starting Materials</b>                    | 4                  |
| <b>General Procedure: Copper Catalysis</b>                  | 31                 |
| <b>Crystal Data</b>                                         | 67                 |
| <b>Computational Studies</b>                                | 69                 |
| <b>HPLC Chromatograms</b>                                   | 243                |
| <b><sup>1</sup>H and <sup>13</sup>C NMR Spectra</b>         | 292                |

**General Information.** Ethyl acetate (ACS grade), hexanes (ACS grade) and anhydrous 1,2-dichloroethane (ACS grade) were obtained commercially and used without further purification. Methylene chloride, tetrahydrofuran and diethyl ether were purified according to standard methods unless otherwise noted. Commercially available reagents were used without further purification. Reactions were monitored by thin layer chromatography (TLC) using silicycle pre-coated silica gel plates. Flash column chromatography was performed over silica gel (300-400 mesh). Infrared spectra were recorded on a Nicolet AVATER FTIR330 spectrometer as thin film and are reported in reciprocal centimeter ( $\text{cm}^{-1}$ ). Mass spectra were recorded with Micromass QTOF2 Quadrupole/Time-of-Flight Tandem mass spectrometer using electron spray ionization.

$^1\text{H}$  NMR spectra were recorded on a Bruker AV-400 spectrometer and a Bruker AV-500 spectrometer in chloroform- $\text{d}_3$ . Chemical shifts are reported in ppm with the internal TMS signal at 0.0 ppm as a standard. The data is being reported as (s = singlet, d = doublet, t = triplet, m = multiplet or unresolved, brs = broad singlet, coupling constant(s) in Hz, integration).

$^{13}\text{C}$  NMR spectra were recorded on a Bruker AV-400 spectrometer and a Bruker AV-500 spectrometer in chloroform- $\text{d}_3$ . Chemical shifts are reported in ppm with the internal chloroform signal at 77.0 ppm as a standard.

## More Reaction Condition, Scope and Mechanism Studies

1. The reaction of model substrate **1a** in the absence of the chiral ligand gave the desired tricyclic pyrrole *rac*-**2a** in 60% NMR yield.

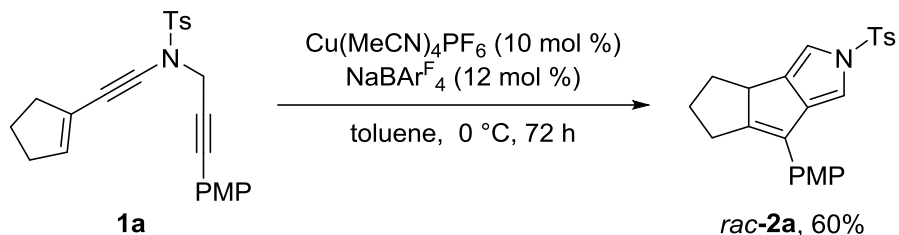

**Supplementary Figure 1.** Reaction of substrate **1a** in the absence of the chiral ligand.

2. The use of 2,6-di-*tert*-butyl-4-methylpyridine as base with large steric hindrance substantially accelerated the reaction (1.5 h vs 3 h).

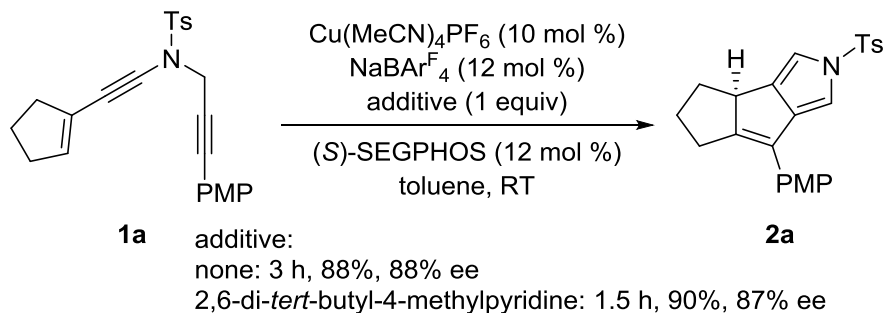

**Supplementary Figure 2.** Reaction of substrate **1a** in the presence of 2,6-di-*tert*-butyl-4-methylpyridine as base.

3. Attempted to extend the reaction to the alkenyl-substituted ynamide **1al** only led to the formation of the corresponding pyrrole product in very low yield (<10%).

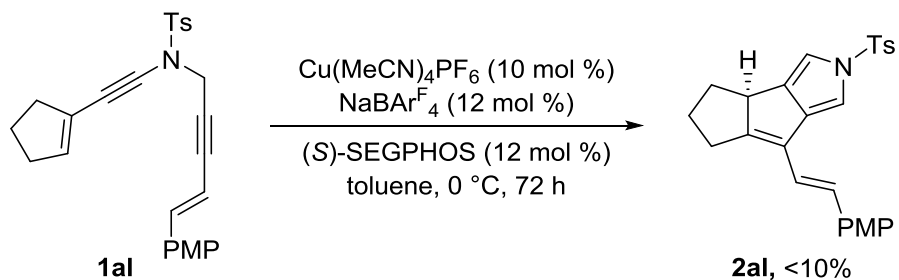

**Supplementary Figure 3.** Cu-catalyzed cascade cyclization of ynamide **1al**.

4. Attempted to extend the reaction to the alkyl-substituted and terminal ynamides **1am** and **1an** only gave a complicated mixture of products, and no desired **2am** and **2an** were obtained.

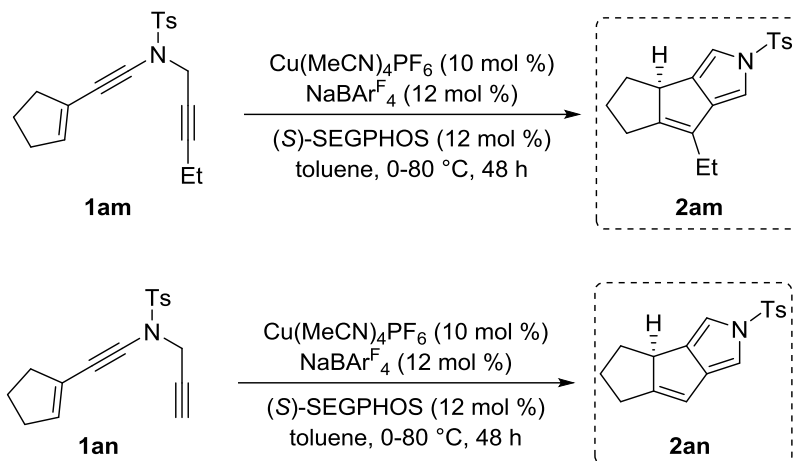

**Supplementary Figure 4.** Cu-catalyzed cascade cyclization of ynamides **1am** and **1an**.

5. The mixture of substrates **1a** and  $[\text{D}_3]\text{-1a}$  (1 : 1 ratio) was used to probe the intermolecular isotope effect (0 °C:  $k_{\text{H}}/k_{\text{D}} = 1.5$ ; rt:  $k_{\text{H}}/k_{\text{D}} = 1.5$ ). These KIE data suggest that the cleavage of vinylic  $\text{C}(\text{sp}^2)\text{-H}$  bond is not the rate-determining step.

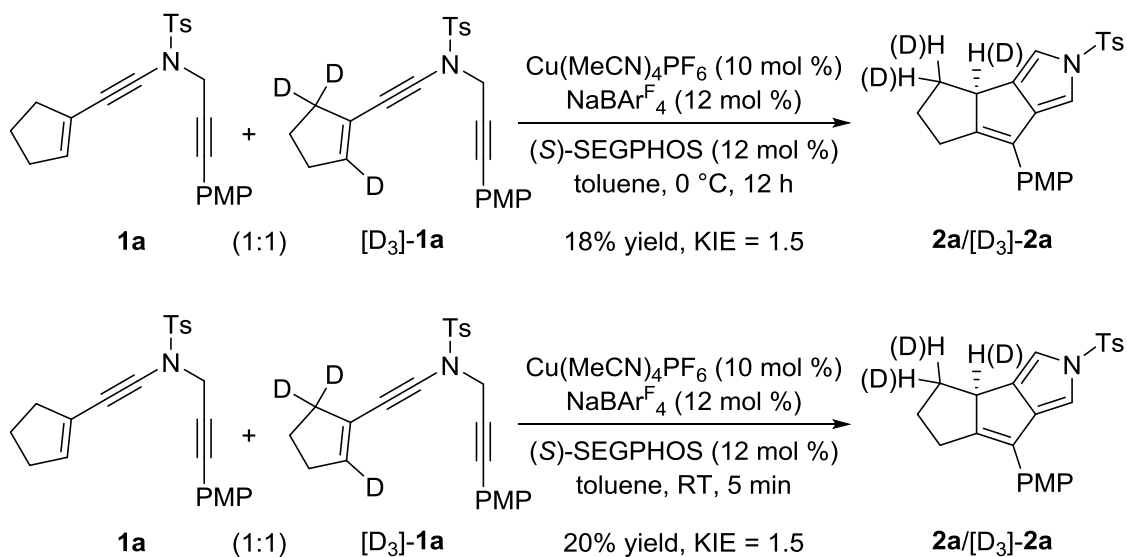

**Supplementary Figure 5.** KIE experiment.

### Representative synthetic procedures for the preparation of ynamides **1**:

General procedure A (**1a-1af**, **1ai**, **1aj**, **1al-1an**):



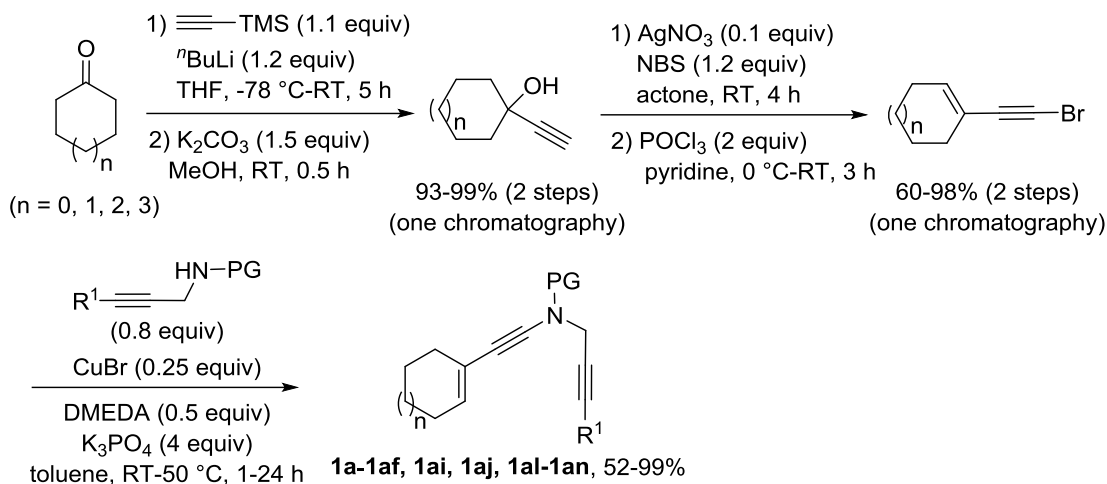

To a solution of trimethylsilyl acetylene (33 mmol, 3.23 g) in 30 mL THF, *n*-butyllithium (36 mmol, 14 mL of 2.5 M solution in hexane) was added dropwise at  $-78\text{ }^\circ\text{C}$ . The mixture was stirred at the same temperature for 0.5 h, then the cyclohexenone (30 mmol) was added dropwise. The resulting solution was warmed up to room temperature and stirred for 5 h. The reaction mixture was then quenched with saturated  $\text{NH}_4\text{Cl}$  (aq.), and the aqueous layer was extracted with  $\text{Et}_2\text{O}$  ( $3 \times 30\text{ mL}$ ). The combined organic extracts were washed with brine and water, dried over  $\text{MgSO}_4$ , filtered and the solvent was removed under reduced pressure to afford the crude alcohol, which was engaged in the next step without purification. To a solution of the crude propargyl alcohol (30 mmol) in 60 mL MeOH was added  $\text{K}_2\text{CO}_3$  (45 mmol, 6.21 g). After stirring for 0.5 h at room temperature, about 90% of the solvent was removed under reduced pressure, and the resulting solution was diluted with 30 mL of water and 30 mL of  $\text{Et}_2\text{O}$ . The aqueous layer was extracted with  $\text{Et}_2\text{O}$  ( $3 \times 30\text{ mL}$ ) and the combined organic extracts were washed with brine and water, dried over  $\text{MgSO}_4$  and evaporated under reduced pressure to afford the pure alcohol (93-99% yields over two steps).

$\text{NBS}$  (36 mmol, 6.41 g) and  $\text{AgNO}_3$  (3.0 mmol, 0.51 g) were added to propargyl alcohol (30 mmol) in actone (60 mL) successively at room temperature. Then, the reaction mixture was stirred at room temperature for 4 h. Upon completion, the mixture was filtered through a pad of celite and then concentrated in vacuum. The crude brominated alkyne was used in the next step without purification.  $\text{POCl}_3$  (60 mmol, 9.20 g) was added dropwise to the crude chlorinated alkyne (30 mmol) in 60 mL pyridine at  $0\text{ }^\circ\text{C}$ , then the mixture was allowed to warm to room temperature and the progress of the

reaction was monitored by TLC. Upon completion, water was added dropwise at 0 °C to quench the reaction, the mixture was then extracted with ether (3 × 30 mL) and the combined organic extracts were washed with brine and water, dried over MgSO<sub>4</sub>, filtered and concentrated in vacuum. The residue was purified by flash chromatography on silica gel to afford 3-en-1-brominated alkyne (60-98% yields over two steps).

To a solution of brominated alkyne (1.0 mmol) in toluene (8 mL) was added copper bromide (0.25 mmol, 36 mg), DMEDA (0.5 mmol, 44 mg), K<sub>3</sub>PO<sub>4</sub> (4 mmol, 0.85 g), protected propargylamide derivative (0.8 mmol). The reaction was stirred at rt or 50 °C for 1-24 h and the progress of the reaction was monitored by TLC. Upon completion, the solution was then filtered and concentrated under a reduced pressure. The residue was purified by silica gel column chromatography (eluent: hexanes/EtOAc, 52-99%).

General procedure B (**1z-1ab**)<sup>1</sup>:

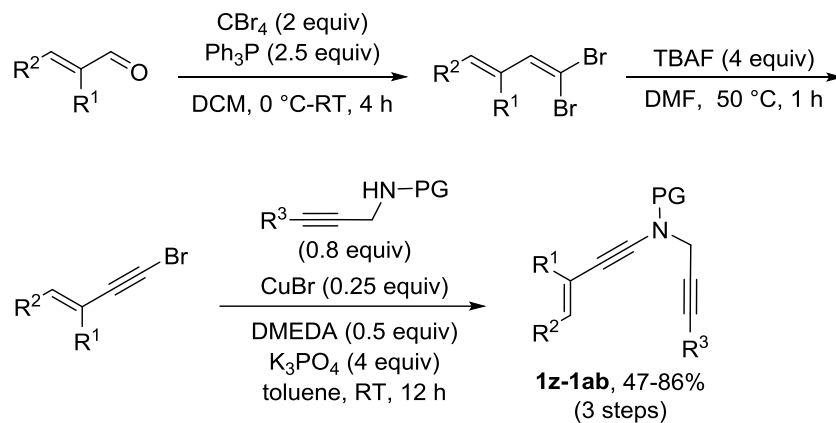

General procedure C (**1ag, 1ah and 1ak**)<sup>2</sup>:

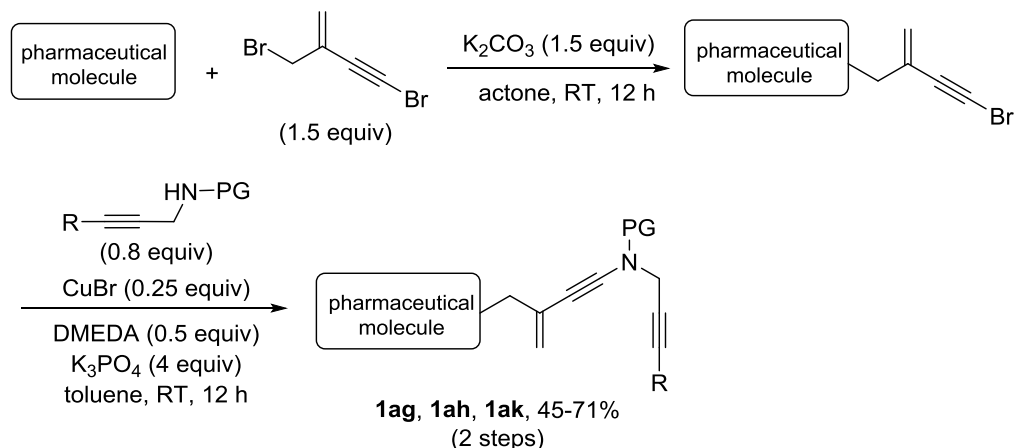

***N*-(cyclopent-1-en-1-ylethynyl)-*N*-(3-(4-methoxyphenyl)prop-2-yn-1-yl)-4-methylbenzenesulfonamide (1a)**

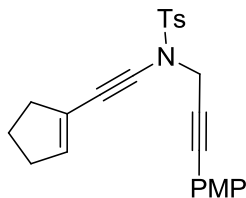

**1a**

Pale yellow oil.  $^1\text{H}$  NMR (400 MHz,  $\text{CDCl}_3$ )  $\delta$  7.90 – 7.83 (m, 2H), 7.31 – 7.25 (m, 2H), 7.14 – 7.08 (m, 2H), 6.82 – 6.74 (m, 2H), 5.97 – 5.94 (m, 1H), 4.46 (s, 2H), 3.79 (s, 3H), 2.45 – 2.38 (m, 4H), 2.36 (s, 3H), 1.92 – 1.83 (m, 2H);  $^{13}\text{C}$  NMR (100 MHz,  $\text{CDCl}_3$ )  $\delta$  159.7, 144.6, 136.7, 134.3, 133.1, 129.4, 128.2, 123.6, 114.2, 113.7, 86.3, 83.0, 79.8, 68.5, 55.2, 42.9, 36.5, 33.2, 23.2, 21.5; IR (neat): 2945, 2216, 2004, 1712, 1653, 1525, 1323, 1267, 1052, 837, 663, 542; HRESIMS Calcd for  $[\text{C}_{24}\text{H}_{23}\text{NNaO}_3\text{S}]^+$  ( $\text{M} + \text{Na}^+$ ) 428.1291, found 428.1290.

***N*-(cyclopent-1-en-1-ylethynyl)-*N*-(3-(4-methoxyphenyl)prop-2-yn-1-yl)benzenesulfonamide (1b)**

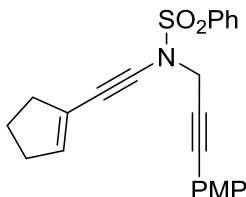

**1b**

Pale yellow oil.  $^1\text{H}$  NMR (400 MHz,  $\text{CDCl}_3$ )  $\delta$  8.03 – 7.95 (m, 2H), 7.61 – 7.45 (m, 3H), 7.12 (d,  $J = 8.8$  Hz, 2H), 6.77 (d,  $J = 8.8$  Hz, 2H), 6.01 – 5.93 (m, 1H), 4.49 (s, 2H), 3.78 (s, 3H), 2.46 – 2.35 (m, 4H), 1.93 – 1.82 (m, 2H);  $^{13}\text{C}$  NMR (100 MHz,  $\text{CDCl}_3$ )  $\delta$  159.8, 137.2, 136.9, 133.6, 133.1, 128.8, 128.1, 123.5, 114.0, 113.7, 86.4, 82.7, 79.7, 68.6, 55.2, 43.0, 36.4, 33.2, 23.1; IR (neat): 2964, 2231, 2014, 1686, 1554, 1324, 1133, 1014, 834, 757, 546; HRESIMS Calcd for  $[\text{C}_{23}\text{H}_{21}\text{NNaO}_3\text{S}]^+$  ( $\text{M} + \text{Na}^+$ ) 414.1134, found 414.1134.

***N*-(cyclopent-1-en-1-ylethynyl)-4-methoxy-*N*-(3-(4-methoxyphenyl)prop-2-yn-1-yl)benzenesulfonamide (1c)**

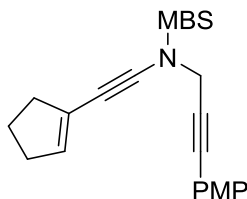

**1c**

Pale yellow oil.  $^1\text{H}$  NMR (400 MHz,  $\text{CDCl}_3$ )  $\delta$  7.95 – 7.87 (m, 2H), 7.16 – 7.09 (m, 2H), 6.96 – 6.89 (m, 2H), 6.82 – 6.74 (m, 2H), 5.98 – 5.92 (m, 1H), 4.46 (s, 2H), 3.79 (s, 3H), 3.78 (s, 3H), 2.47 – 2.37 (m, 4H), 1.94 – 1.83 (m, 2H);  $^{13}\text{C}$  NMR (100 MHz,  $\text{CDCl}_3$ )  $\delta$  163.7, 159.7, 136.7, 133.1, 130.4, 128.8, 123.6, 114.2, 114.0, 113.7, 86.3, 83.1, 79.9, 68.5, 55.5, 55.2, 42.9, 36.5, 33.2, 23.2; IR (neat): 2943, 2242, 2011, 1772, 1571, 1334, 1121, 1004, 814, 612, 571; HRESIMS Calcd for  $[\text{C}_{24}\text{H}_{23}\text{NNaO}_4\text{S}]^+$  ( $\text{M} + \text{Na}^+$ ) 444.1240, found 444.1242.

***4*-bromo-*N*-(cyclopent-1-en-1-ylethynyl)-*N*-(3-(4-methoxyphenyl)prop-2-yn-1-yl)benzenesulfonamide (1d)**

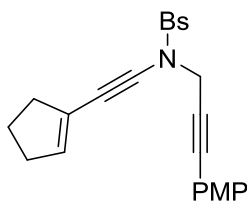

**1d**

Pale yellow oil.  $^1\text{H}$  NMR (400 MHz,  $\text{CDCl}_3$ )  $\delta$  7.90 – 7.80 (m, 2H), 7.67 – 7.56 (m, 2H), 7.11 – 7.05 (m, 2H), 6.85 – 6.76 (m, 2H), 6.02 – 5.94 (m, 1H), 4.49 (s, 2H), 3.80 (s, 3H), 2.49 – 2.36 (m, 4H), 1.95 – 1.83 (m, 2H);  $^{13}\text{C}$  NMR (100 MHz,  $\text{CDCl}_3$ )  $\delta$  159.9, 137.5, 136.3, 133.1, 132.1, 129.7, 128.9, 123.3, 113.9, 113.8, 86.7, 82.4, 79.5, 68.8, 55.3, 43.2, 36.5, 33.2, 23.2; IR (neat): 2911, 2247, 2074, 1747, 1521, 1377, 1286, 1193, 1068, 835, 536; HRESIMS Calcd for  $[\text{C}_{23}\text{H}_{20}\text{BrNNaO}_3\text{S}]^+$  ( $\text{M} + \text{Na}^+$ ) 492.0239, found 492.0238.

***N*-(cyclopent-1-en-1-ylethynyl)-*N*-(3-(4-methoxyphenyl)prop-2-yn-1-yl)naphthalene-2-sulfonamide (1e)**

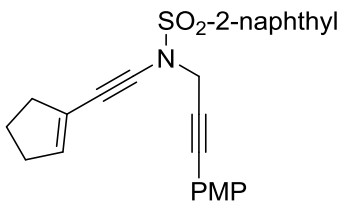

**1e**

Pale yellow oil.  $^1\text{H}$  NMR (400 MHz,  $\text{CDCl}_3$ )  $\delta$  8.55 (s, 1H), 7.98 (d,  $J = 8.4$  Hz, 1H), 7.93 – 7.81 (m, 3H), 7.64 – 7.50 (m, 2H), 6.82 (d,  $J = 8.8$  Hz, 2H), 6.59 (d,  $J = 8.8$  Hz, 2H), 6.05 – 5.89 (m, 1H), 4.53 (s, 2H), 3.72 (s, 3H), 2.49 – 2.30 (m, 4H), 1.93 – 1.75 (m, 2H);  $^{13}\text{C}$  NMR (100 MHz,  $\text{CDCl}_3$ )  $\delta$  159.5, 136.9, 135.2, 134.2, 132.8, 131.8, 129.8, 129.3, 129.0, 128.9, 127.9, 127.4, 123.4, 123.0, 113.7, 113.5, 86.4, 82.9, 79.6, 68.6, 55.1, 43.1, 36.4, 33.1, 23.1; IR (neat): 2946, 2223, 2017, 1678, 1525, 1379, 1267, 1033, 856, 724, 667; HRESIMS Calcd for  $[\text{C}_{27}\text{H}_{23}\text{NNaO}_3\text{S}]^+$  ( $\text{M} + \text{Na}^+$ ) 464.1291, found 464.1292.

***N*-(cyclopent-1-en-1-ylethynyl)-*N*-(3-(4-methoxyphenyl)prop-2-yn-1-yl)thiophene-2-sulfonamide (1f)**

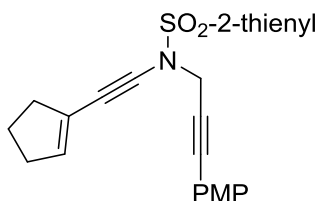

**1f**

Pale yellow oil.  $^1\text{H}$  NMR (400 MHz,  $\text{CDCl}_3$ )  $\delta$  7.80 – 7.74 (m, 1H), 7.66 – 7.60 (m, 1H), 7.22 – 7.16 (m, 2H), 7.11 – 7.06 (m, 1H), 6.82 – 6.76 (m, 2H), 6.03 – 5.96 (m, 1H), 4.50 (s, 2H), 3.79 (s, 3H), 2.48 – 2.37 (m, 4H), 1.95 – 1.83 (m, 2H);  $^{13}\text{C}$  NMR (100 MHz,  $\text{CDCl}_3$ )  $\delta$  159.8, 137.4, 136.6, 134.0, 133.5, 133.1, 127.3, 123.4, 114.1, 113.8, 86.5, 82.2, 79.3, 69.5, 55.2, 43.2, 36.5, 33.2, 23.2; IR (neat): 2945, 2245, 2074, 1663, 1444, 1424, 1234, 1056, 712, 612, 556; HRESIMS Calcd for  $[\text{C}_{21}\text{H}_{19}\text{NNaO}_3\text{S}_2]^+$  ( $\text{M} + \text{Na}^+$ ) 420.0699, found 420.0699.

***N*-(cyclopent-1-en-1-ylethynyl)-4-methyl-*N*-(3-(4-phenoxyphenyl)prop-2-yn-1-yl)benzenesulfonamide (1g)**

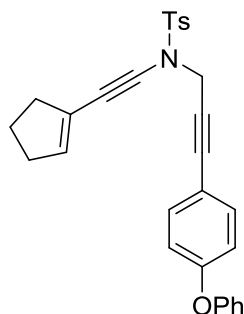

**1g**

Pale yellow oil.  $^1\text{H}$  NMR (400 MHz,  $\text{CDCl}_3$ )  $\delta$  7.87 (d,  $J = 8.4$  Hz, 2H), 7.38 – 7.32 (m, 2H), 7.30 – 7.26 (m, 2H), 7.17 – 7.10 (m, 3H), 7.03 – 6.97 (m, 2H), 6.88 – 6.83 (m, 2H), 5.98 – 5.93 (m, 1H), 4.47 (s, 2H), 2.46 – 2.37 (m, 4H), 2.36 (s, 3H), 1.96 – 1.82 (m, 2H);  $^{13}\text{C}$  NMR (100 MHz,  $\text{CDCl}_3$ )  $\delta$  157.8, 156.2, 144.6, 136.8, 134.3, 133.2, 129.9, 129.4, 128.2, 123.9, 123.6, 119.4, 118.0, 116.6, 85.9, 82.9, 80.6, 68.6, 42.9, 36.5, 33.2, 23.2, 21.5; IR (neat): 2953, 2224, 2014, 1614, 1511, 1434, 1145, 822, 589, 574; HRESIMS Calcd for  $[\text{C}_{29}\text{H}_{25}\text{NNaO}_3\text{S}]^+$  ( $\text{M} + \text{Na}^+$ ) 490.1447, found 490.1448.

***N*-(3-(4-(benzyloxy)phenyl)prop-2-yn-1-yl)-*N*-(cyclopent-1-en-1-ylethynyl)-4-methylbenzenesulfonamide (1h)**

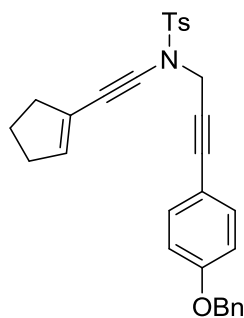

**1h**

Pale yellow oil.  $^1\text{H}$  NMR (400 MHz,  $\text{CDCl}_3$ )  $\delta$  7.86 (d,  $J = 8.4$  Hz, 2H), 7.43 – 7.31 (m, 5H), 7.25 – 7.23 (m, 2H), 7.10 (d,  $J = 8.8$  Hz, 2H), 6.84 (d,  $J = 8.8$  Hz, 2H), 5.97 – 5.91 (m, 1H), 5.04 (s, 2H), 4.45 (s, 2H), 2.46 – 2.37 (m, 4H), 2.34 (s, 3H), 1.93 – 1.83 (m, 2H);  $^{13}\text{C}$  NMR (100 MHz,  $\text{CDCl}_3$ )  $\delta$  158.8, 144.6, 136.7, 136.4, 134.3, 133.1, 129.4, 128.6, 128.2, 128.0, 127.4, 123.5, 114.6, 114.4, 86.2, 82.9, 79.9, 69.9, 68.5, 42.9, 36.5, 33.2, 23.2, 21.5; IR (neat): 2954, 2262, 2078, 1614, 1544, 1441, 1157, 893, 532, 545; HRESIMS Calcd for  $[\text{C}_{30}\text{H}_{27}\text{NNaO}_3\text{S}]^+$  ( $\text{M} + \text{Na}^+$ ) 504.1604, found 504.1604.

***N*-(3-(4-((*tert*-butyldimethylsilyl)oxy)phenyl)prop-2-yn-1-yl)-*N*-(cyclopent-1-en-1-ylethynyl)-4-methylbenzenesulfonamide (1i)**

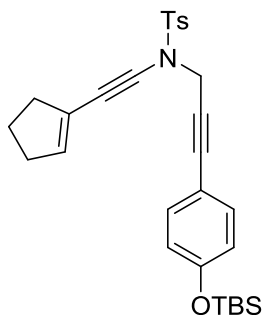

**1i**

Pale yellow oil.  $^1\text{H}$  NMR (400 MHz,  $\text{CDCl}_3$ )  $\delta$  7.86 (d,  $J = 8.4$  Hz, 2H), 7.27 (d,  $J = 8.0$  Hz, 2H), 7.08 – 7.02 (m, 2H), 6.74 – 6.67 (m, 2H), 6.01 – 5.92 (m, 1H), 4.46 (s, 2H), 2.47 – 2.37 (m, 4H), 2.36 (s, 3H), 1.94 – 1.82 (m, 2H), 0.97 (s, 9H), 0.19 (s, 6H);  $^{13}\text{C}$  NMR (100 MHz,  $\text{CDCl}_3$ )  $\delta$  156.1, 144.6, 136.7, 134.3, 133.1, 129.4, 128.2, 123.6, 119.9, 114.8, 86.3, 83.0, 79.9, 68.5, 42.9, 36.5, 33.2, 25.6, 23.2, 21.5, 18.2, -4.5; IR (neat): 2910, 2255, 2017, 1641, 1571, 1304, 1276, 1124, 1082, 804, 771, 573; HRESIMS Calcd for  $[\text{C}_{29}\text{H}_{35}\text{NNaO}_3\text{SSi}]^+$  ( $\text{M} + \text{Na}^+$ ) 528.1999, found 528.2004.

***N*-(cyclopent-1-en-1-ylethynyl)-4-methyl-*N*-(3-(4-((*triisopropylsilyl*)oxy)phenyl)prop-2-yn-1-yl)benzenesulfonamide (1j)**

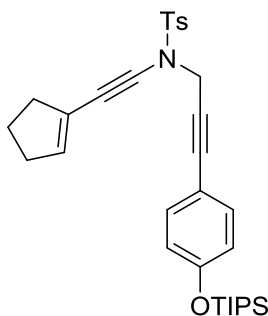

**1j**

Pale yellow oil.  $^1\text{H}$  NMR (400 MHz,  $\text{CDCl}_3$ )  $\delta$  7.87 (d,  $J = 8.4$  Hz, 2H), 7.30 – 7.26 (m, 2H), 7.07 – 6.99 (m, 2H), 6.78 – 6.71 (m, 2H), 5.98 – 5.92 (m, 1H), 4.46 (s, 2H), 2.47 – 2.38 (m, 4H), 2.36 (s, 3H), 1.94 – 1.84 (m, 2H), 1.31 – 1.18 (m, 3H), 1.09 (d,  $J = 7.2$  Hz, 18H);  $^{13}\text{C}$  NMR (100 MHz,  $\text{CDCl}_3$ )  $\delta$  156.5, 144.6, 136.7, 134.3, 133.1, 129.4, 128.2,

123.6, 119.7, 114.5, 86.4, 83.0, 79.9, 68.5, 43.0, 36.5, 33.2, 23.2, 21.5, 17.8, 12.6; IR (neat): 2911, 2244, 2020, 1641, 1541, 1444, 1182, 814, 592, 582; HRESIMS Calcd for  $[\text{C}_{32}\text{H}_{41}\text{NNaO}_3\text{SSi}]^+$  ( $\text{M} + \text{Na}^+$ ) 570.2469, found 570.2467.

**4-(3-((*N*-(cyclopent-1-en-1-ylethynyl)-4-methylphenyl)sulfonamido)prop-1-yn-1-yl)phenyl acetate (1k)**

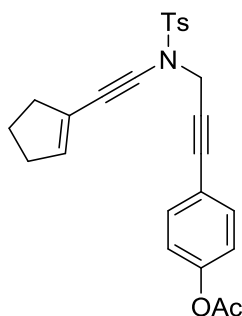

**1k**

Pale yellow oil.  $^1\text{H}$  NMR (400 MHz,  $\text{CDCl}_3$ )  $\delta$  7.86 (d,  $J = 8.4$  Hz, 2H), 7.27 (d,  $J = 8.0$  Hz, 2H), 7.19 – 7.13 (m, 2H), 7.02 – 6.95 (m, 2H), 5.99 – 5.92 (m, 1H), 4.47 (s, 2H), 2.47 – 2.39 (m, 4H), 2.35 (s, 3H), 2.28 (s, 3H), 1.94 – 1.83 (m, 2H);  $^{13}\text{C}$  NMR (100 MHz,  $\text{CDCl}_3$ )  $\delta$  169.0, 150.6, 144.7, 136.9, 134.2, 132.7, 129.4, 128.1, 123.4, 121.4, 119.6, 85.4, 82.8, 81.3, 68.5, 42.7, 36.4, 33.1, 23.1, 21.5, 21.0; IR (neat): 2947, 2810, 2220, 2017, 1689(s), 1647, 1514, 1341, 1117, 1010, 871, 512; HRESIMS Calcd for  $[\text{C}_{25}\text{H}_{23}\text{NNaO}_4\text{S}]^+$  ( $\text{M} + \text{Na}^+$ ) 456.1240, found 456.1244.

***N*-(cyclopent-1-en-1-ylethynyl)-*N*-(3-(2-methoxyphenyl)prop-2-yn-1-yl)-4-methylbenzenesulfonamide (1l)**

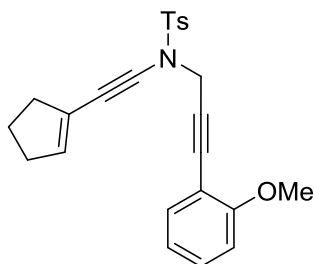

**1l**

Pale yellow oil.  $^1\text{H}$  NMR (400 MHz,  $\text{CDCl}_3$ )  $\delta$  7.87 (d,  $J = 8.4$  Hz, 2H), 7.27 – 7.23 (m, 3H), 7.06 – 7.00 (m, 1H), 6.86 – 6.78 (m, 2H), 5.98 – 5.92 (m, 1H), 4.54 (s, 2H), 3.82 (s,



3H), 2.46 – 2.40 (m, 4H), 2.34 (s, 3H), 1.97 – 1.83 (m, 2H);  $^{13}\text{C}$  NMR (100 MHz,  $\text{CDCl}_3$ )  $\delta$  160.0, 144.5, 136.6, 134.2, 133.8, 130.0, 129.4, 128.2, 123.6, 120.2, 111.3, 110.6, 85.2, 82.9, 82.8, 68.6, 55.7, 43.1, 36.5, 33.2, 23.2, 21.5; IR (neat): 2910, 2200, 2025, 1601, 1344, 1118, 1044, 714, 667, 578, 541; HRESIMS Calcd for  $[\text{C}_{24}\text{H}_{23}\text{NNaO}_3\text{S}]^+$  ( $\text{M} + \text{Na}^+$ ) 428.1291, found 428.1291.

***N*-(cyclopent-1-en-1-ylethynyl)-*N*-(3-(4-methoxy-3-methylphenyl)prop-2-yn-1-yl)-4-methylbenzenesulfonamide (1m)**

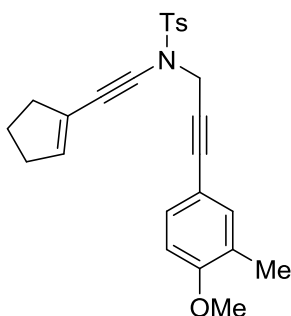

**1m**

Pale yellow oil.  $^1\text{H}$  NMR (400 MHz,  $\text{CDCl}_3$ )  $\delta$  7.87 (d,  $J = 8.4$  Hz, 2H), 7.29 – 7.25 (m, 2H), 7.04 – 6.92 (m, 2H), 6.68 (d,  $J = 8.8$  Hz, 1H), 5.98 – 5.92 (m, 1H), 4.46 (s, 2H), 3.81 (s, 3H), 2.46 – 2.39 (m, 4H), 2.37 (s, 3H), 2.15 (s, 3H), 1.93 – 1.82 (m, 2H);  $^{13}\text{C}$  NMR (100 MHz,  $\text{CDCl}_3$ )  $\delta$  158.0, 144.5, 136.7, 134.4, 133.8, 130.6, 129.4, 128.2, 126.5, 123.6, 113.6, 109.5, 86.6, 83.0, 79.4, 68.5, 55.3, 43.0, 36.5, 33.2, 23.2, 21.5, 15.9; IR (neat): 2944, 2240, 2019, 1671, 1371, 1110, 1004, 710, 604, 511; ESIMS Calcd for  $[\text{C}_{25}\text{H}_{25}\text{NNaO}_3\text{S}]^+$  ( $\text{M} + \text{Na}^+$ ) 442.1447, found 442.1441.

***N*-(cyclopent-1-en-1-ylethynyl)-*N*-(3-(3,4-dimethoxyphenyl)prop-2-yn-1-yl)-4-methylbenzenesulfonamide (1n)**

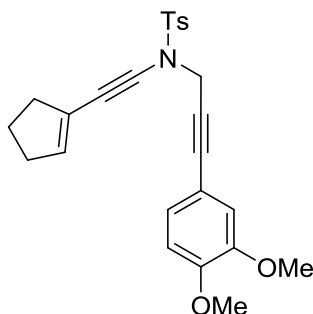

### 1n

Pale yellow oil.  $^1\text{H}$  NMR (400 MHz,  $\text{CDCl}_3$ )  $\delta$  7.87 (d,  $J = 8.4$  Hz, 2H), 7.28 (d,  $J = 8.0$  Hz, 2H), 6.83 – 6.77 (m, 1H), 6.77 – 6.71 (m, 2H), 5.98 – 5.92 (m, 1H), 4.47 (s, 2H), 3.87 (s, 3H), 3.83 (s, 3H), 2.47 – 2.39 (m, 4H), 2.37 (s, 3H), 1.93 – 1.82 (m, 2H);  $^{13}\text{C}$  NMR (100 MHz,  $\text{CDCl}_3$ )  $\delta$  149.6, 148.4, 144.6, 136.7, 134.2, 129.3, 128.1, 125.0, 123.5, 114.3, 114.2, 110.7, 86.4, 82.9, 79.7, 68.5, 55.8, 42.8, 36.4, 33.1, 23.1, 21.5; IR (neat): 2944, 2229, 2028, 1344, 1111, 1022, 910, 810, 771, 644, 510; HRESIMS Calcd for  $[\text{C}_{25}\text{H}_{25}\text{NNaO}_4\text{S}]^+$  ( $\text{M} + \text{Na}^+$ ) 458.1397, found 458.1391.

### *N*-(3-(benzo[*d*][1,3]dioxol-5-yl)prop-2-yn-1-yl)-*N*-(cyclopent-1-en-1-ylethynyl)-4-methylbenzenesulfonamide (1o)

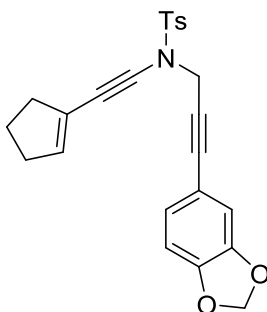

### 1o

Pale yellow oil.  $^1\text{H}$  NMR (400 MHz,  $\text{CDCl}_3$ )  $\delta$  7.86 (d,  $J = 8.4$  Hz, 2H), 7.29 (d,  $J = 8.0$  Hz, 2H), 6.73 – 6.65 (m, 2H), 6.57 – 6.54 (m, 1H), 5.98 – 5.92 (m, 3H), 4.45 (s, 2H), 2.47 – 2.40 (m, 4H), 2.39 (s, 3H), 1.94 – 1.82 (m, 2H);  $^{13}\text{C}$  NMR (100 MHz,  $\text{CDCl}_3$ )  $\delta$  148.0, 147.2, 144.7, 136.9, 134.3, 129.5, 128.2, 126.3, 123.5, 115.3, 111.6, 108.2, 101.3, 86.2, 82.9, 79.6, 68.5, 42.9, 36.5, 33.2, 23.2, 21.5; IR (neat): 2920, 2201, 2035, 1510, 1344, 1111, 746, 664, 611, 545; HRESIMS Calcd for  $[\text{C}_{24}\text{H}_{21}\text{NNaO}_4\text{S}]^+$  ( $\text{M} + \text{Na}^+$ ) 442.1083, found 442.1080.

### *N*-(cyclopent-1-en-1-ylethynyl)-*N*-(3-(4-(dimethylamino)phenyl)prop-2-yn-1-yl)-4-methylbenzenesulfonamide (1p)

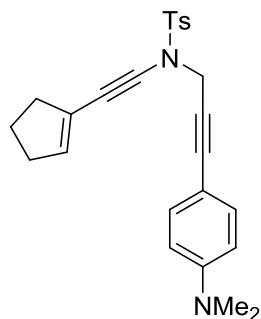

**1p**

Pale yellow oil.  $^1\text{H}$  NMR (400 MHz,  $\text{CDCl}_3$ )  $\delta$  7.86 (d,  $J = 8.4$  Hz, 2H), 7.27 (d,  $J = 8.0$  Hz, 2H), 7.08 – 7.01 (m, 2H), 6.57 – 6.50 (m, 2H), 5.97 – 5.92 (m, 1H), 4.47 (s, 2H), 2.94 (s, 6H), 2.45 – 2.38 (m, 4H), 2.37 (s, 3H), 1.93 – 1.81 (m, 2H);  $^{13}\text{C}$  NMR (100 MHz,  $\text{CDCl}_3$ )  $\delta$  150.1, 144.5, 136.5, 134.3, 132.7, 129.4, 128.1, 123.6, 111.4, 108.7, 87.4, 83.1, 78.8, 68.5, 43.2, 40.0, 36.4, 33.1, 23.1, 21.5; IR (neat): 2944, 2247, 2021, 1711, 1611, 1514, 1311, 1220, 1034, 831, 664, 518; HRESIMS Calcd for  $[\text{C}_{25}\text{H}_{26}\text{N}_2\text{NaO}_2\text{S}]^+$  ( $\text{M} + \text{Na}^+$ ) 441.1607, found 441.1607.

***N*-(cyclopent-1-en-1-ylethynyl)-*N*-(3-(4-(dibenzylamino)phenyl)prop-2-yn-1-yl)-4-methylbenzenesulfonamide (1q)**

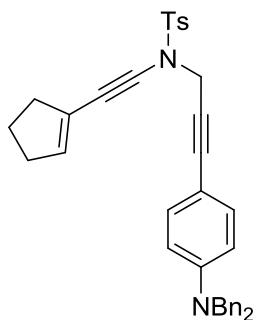

**1q**

Pale yellow oil.  $^1\text{H}$  NMR (400 MHz,  $\text{CDCl}_3$ )  $\delta$  7.83 (d,  $J = 8.4$  Hz, 2H), 7.32 – 7.29 (m, 3H), 7.26 – 7.16 (m, 9H), 6.96 (d,  $J = 8.8$  Hz, 2H), 6.56 (d,  $J = 9.2$  Hz, 2H), 5.94 – 5.89 (m, 1H), 4.62 (s, 4H), 4.41 (s, 2H), 2.44 – 2.33 (m, 4H), 2.27 (s, 3H), 1.90 – 1.79 (m, 2H);  $^{13}\text{C}$  NMR (100 MHz,  $\text{CDCl}_3$ )  $\delta$  148.9, 144.5, 137.7, 136.5, 134.3, 132.8, 129.3, 128.6, 128.0, 127.0, 126.3, 123.5, 111.7, 109.4, 87.2, 83.0, 78.9, 68.4, 54.0, 43.1, 36.4, 33.1, 23.1, 21.4 ; IR (neat): 2978, 2247, 2022, 1712, 1614, 1524, 1325,

1221, 1032, 878, 612, 527; HRESIMS Calcd for  $[C_{37}H_{34}N_2NaO_2S]^+$  ( $M + Na^+$ ) 593.2233, found 593.2234.

***N*-(3-(4-(bis(4-methoxybenzyl)amino)phenyl)prop-2-yn-1-yl)-*N*-(cyclopent-1-en-1-ylethynyl)-4-methylbenzenesulfonamide (1r)**

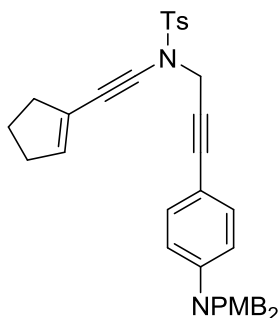

**1r**

Pale yellow oil.  $^1H$  NMR (400 MHz,  $CDCl_3$ )  $\delta$  7.83 (d,  $J = 8.0$  Hz, 2H), 7.22 (d,  $J = 8.4$  Hz, 2H), 7.09 (d,  $J = 8.4$  Hz, 4H), 6.96 (d,  $J = 8.8$  Hz, 2H), 6.87 – 6.81 (m, 4H), 6.58 (d,  $J = 9.2$  Hz, 2H), 5.95 – 5.90 (m, 1H), 4.53 (s, 4H), 4.42 (s, 2H), 3.75 (s, 6H), 2.43 – 2.33 (m, 4H), 2.29 (s, 3H), 1.90 – 1.80 (m, 2H);  $^{13}C$  NMR (100 MHz,  $CDCl_3$ )  $\delta$  158.6, 149.0, 144.4, 136.5, 134.2, 132.8, 129.6, 129.3, 128.0, 127.6, 123.5, 114.0, 111.8, 109.2, 87.2, 83.0, 78.8, 68.4, 55.1, 53.3, 43.0, 36.4, 33.1, 23.1, 21.4; IR (neat): 2948, 2241, 2020, 1701, 1611, 1514, 1357, 1278, 1051, 812, 678, 578; HRESIMS Calcd for  $[C_{39}H_{38}N_2NaO_4S]^+$  ( $M + Na^+$ ) 653.2444, found 653.2447.

***N*-(cyclopent-1-en-1-ylethynyl)-4-methyl-*N*-(3-(4-(methylthio)phenyl)prop-2-yn-1-yl)benzenesulfonamide (1s)**

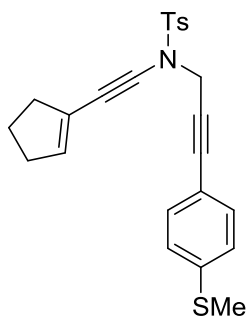

**1s**

Pale yellow oil.  $^1\text{H}$  NMR (400 MHz,  $\text{CDCl}_3$ )  $\delta$  7.86 (d,  $J = 8.4$  Hz, 2H), 7.27 (d,  $J = 8.4$  Hz, 2H), 7.13 – 7.03 (m, 4H), 5.98 – 5.94 (m, 1H), 4.47 (s, 2H), 2.49 – 2.39 (m, 7H), 2.36 (s, 3H), 1.93 – 1.82 (m, 2H);  $^{13}\text{C}$  NMR (100 MHz,  $\text{CDCl}_3$ )  $\delta$  144.6, 139.7, 136.8, 134.2, 131.8, 129.4, 128.1, 125.4, 123.5, 118.2, 86.1, 82.9, 81.2, 68.5, 42.8, 36.4, 33.1, 23.1, 21.5, 15.2; IR (neat): 2922, 2210, 2011, 1610, 1600, 1500, 1377, 1272, 1042, 824, 641, 544; HRESIMS Calcd for  $[\text{C}_{24}\text{H}_{23}\text{NNaO}_2\text{S}_2]^+$  ( $\text{M} + \text{Na}^+$ ) 444.1062, found 444.1070.

***N*-(cyclopent-1-en-1-ylethynyl)-4-methyl-*N*-(3-(*p*-tolyl)prop-2-yn-1-yl)benzenesulfonamide (1t)**

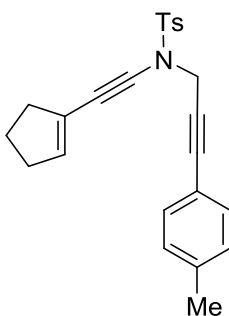

**1t**

Pale yellow oil.  $^1\text{H}$  NMR (400 MHz,  $\text{CDCl}_3$ )  $\delta$  7.87 (d,  $J = 8.4$  Hz, 2H), 7.27 (d,  $J = 8.4$  Hz, 2H), 7.10 – 7.02 (m, 4H), 5.98 – 5.94 (m, 1H), 4.47 (s, 2H), 2.47 – 2.38 (m, 4H), 2.36 (s, 3H), 2.32 (s, 3H), 1.94 – 1.83 (m, 2H);  $^{13}\text{C}$  NMR (100 MHz,  $\text{CDCl}_3$ )  $\delta$  144.6, 138.6, 136.8, 134.3, 131.5, 129.4, 128.8, 128.2, 123.6, 119.0, 86.5, 82.9, 80.5, 68.6, 42.9, 36.5, 33.2, 23.2, 21.5, 21.4; IR (neat): 2974, 2212, 2074, 1610, 1505, 1371, 1112, 1005, 840, 740, 547; HRESIMS Calcd for  $[\text{C}_{24}\text{H}_{23}\text{NNaO}_2\text{S}]^+$  ( $\text{M} + \text{Na}^+$ ) 412.1342, found 412.1340.

***N*-(cyclopent-1-en-1-ylethynyl)-4-methyl-*N*-(3-phenylprop-2-yn-1-yl)benzenesulfonamide (1u)**

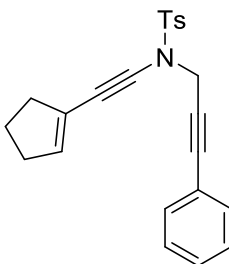

**1u**

Pale yellow oil.  $^1\text{H}$  NMR (400 MHz,  $\text{CDCl}_3$ )  $\delta$  7.87 (d,  $J = 8.4$  Hz, 2H), 7.31 – 7.27 (m, 3H), 7.26 – 7.21 (m, 2H), 7.19 – 7.12 (m, 2H), 5.99 – 5.95 (m, 1H), 4.49 (s, 2H), 2.47 – 2.38 (m, 4H), 2.35 (s, 3H), 1.94 – 1.83 (m, 2H);  $^{13}\text{C}$  NMR (100 MHz,  $\text{CDCl}_3$ )  $\delta$  144.7, 136.9, 134.3, 131.6, 129.5, 128.5, 128.2, 128.1, 123.6, 122.1, 86.3, 82.9, 81.3, 68.6, 42.9, 36.5, 33.2, 23.2, 21.5; IR (neat): 2970, 2271, 2004, 1773, 1688, 1572, 1372, 1217, 1027, 817, 620, 544; HRESIMS Calcd for  $[\text{C}_{23}\text{H}_{21}\text{NNaO}_2\text{S}]^+$  ( $\text{M} + \text{Na}^+$ ) 398.1185, found 398.1187.

***N*-(3-(4-bromophenyl)prop-2-yn-1-yl)-*N*-(cyclopent-1-en-1-ylethynyl)-4-methylbenzenesulfonamide (1v)**

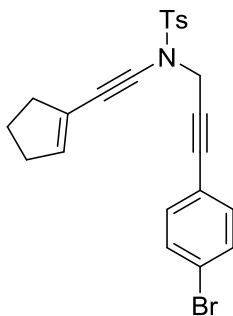

**1v**

Pale yellow oil.  $^1\text{H}$  NMR (400 MHz,  $\text{CDCl}_3$ )  $\delta$  7.87 (d,  $J = 8.4$  Hz, 2H), 7.45 – 7.39 (m, 1H), 7.30 (d,  $J = 8.0$  Hz, 2H), 7.24 – 7.20 (m, 1H), 7.16 – 7.08 (m, 2H), 6.01 – 5.96 (m, 1H), 4.48 (s, 2H), 2.48 – 2.40 (m, 4H), 2.39 (s, 3H), 1.95 – 1.84 (m, 2H);  $^{13}\text{C}$  NMR (100 MHz,  $\text{CDCl}_3$ )  $\delta$  144.9, 137.1, 134.4, 131.6, 130.0, 129.5, 128.2, 124.0, 123.4, 121.8, 84.7, 82.8, 82.7, 68.6, 42.7, 36.5, 33.2, 23.2, 21.6; IR (neat): 2950, 2247, 2047, 1740, 1571, 1320, 1105, 1025, 843, 664, 597; HRESIMS Calcd for  $[\text{C}_{23}\text{H}_{20}\text{BrNNaO}_2\text{S}]^+$  ( $\text{M} + \text{Na}^+$ ) 476.0290, found 476.0291.

***N*-(cyclopent-1-en-1-ylethynyl)-4-methyl-*N*-(3-(thiophen-2-yl)prop-2-yn-1-yl)benzenesulfonamide (1w)**

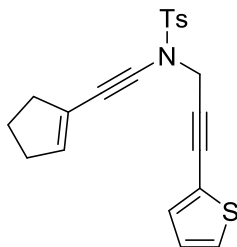

**1w**

Pale yellow oil.  $^1\text{H}$  NMR (400 MHz,  $\text{CDCl}_3$ )  $\delta$  7.86 (d,  $J = 8.4$  Hz, 2H), 7.30 (d,  $J = 8.0$  Hz, 2H), 7.24 – 7.19 (m, 1H), 7.01 (d,  $J = 2.8$  Hz, 1H), 6.94 – 6.89 (m, 1H), 5.99 – 5.95 (m, 1H), 4.50 (s, 2H), 2.47 – 2.39 (m, 4H), 2.38 (s, 3H), 1.94 – 1.83 (m, 2H);  $^{13}\text{C}$  NMR (100 MHz,  $\text{CDCl}_3$ )  $\delta$  144.8, 137.0, 134.1, 132.5, 129.5, 128.1, 127.5, 126.8, 123.5, 121.9, 85.2, 82.8, 79.6, 68.7, 43.0, 36.5, 33.2, 23.2, 21.6; IR (neat): 2944, 2241, 2042, 1612, 1641, 1504, 1373, 1141, 840, 671, 571, 542; HRESIMS Calcd for  $[\text{C}_{21}\text{H}_{19}\text{NNaO}_2\text{S}_2]^+$  ( $\text{M} + \text{Na}^+$ ) 404.0749, found 404.0747.

***N*-(cyclopent-1-en-1-ylethynyl)-4-methyl-*N*-(3-(thiophen-3-yl)prop-2-yn-1-yl)benzenesulfonamide (1x)**

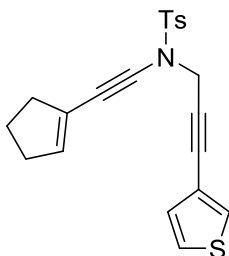

**1x**

Pale yellow oil.  $^1\text{H}$  NMR (400 MHz,  $\text{CDCl}_3$ )  $\delta$  7.89 – 7.83 (m, 2H), 7.28 (d,  $J = 8.0$  Hz, 2H), 7.24 – 7.18 (m, 2H), 6.89 – 6.85 (m, 1H), 5.99 – 5.93 (m, 1H), 4.46 (s, 2H), 2.46 – 2.39 (m, 4H), 2.37 (s, 3H), 1.94 – 1.83 (m, 2H);  $^{13}\text{C}$  NMR (100 MHz,  $\text{CDCl}_3$ )  $\delta$  144.7, 136.8, 134.2, 129.6, 129.4, 129.2, 128.2, 125.1, 123.5, 121.1, 82.9, 81.5, 80.9, 68.6, 42.8, 36.5, 33.2, 23.2, 21.5; IR (neat): 2941, 2225, 2027, 1640, 1671, 1510, 1173, 810, 618, 547; HRESIMS Calcd for  $[\text{C}_{21}\text{H}_{19}\text{NNaO}_2\text{S}_2]^+$  ( $\text{M} + \text{Na}^+$ ) 404.0749, found 404.0747.

***N*-(cyclopent-1-en-1-ylethynyl)-*N*-(5-(4-methoxyphenyl)penta-2,4-diyn-1-yl)-4-methylbenzenesulfonamide (1y)**

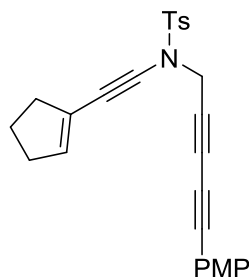

**1y**

Pale yellow oil.  $^1\text{H}$  NMR (400 MHz,  $\text{CDCl}_3$ )  $\delta$  7.85 (d,  $J = 8.0$  Hz, 2H), 7.42 – 7.33 (m, 4H), 6.84 (d,  $J = 8.4$  Hz, 2H), 6.05 – 5.96 (m, 1H), 4.41 (s, 2H), 3.81 (s, 3H), 2.54 – 2.33 (m, 7H), 1.94 – 1.83 (m, 2H);  $^{13}\text{C}$  NMR (100 MHz,  $\text{CDCl}_3$ )  $\delta$  160.5, 145.0, 137.0, 134.2, 133.9, 129.5, 128.2, 123.4, 114.1, 112.9, 82.6, 78.4, 74.0, 71.9, 71.2, 68.8, 55.3, 43.0, 36.4, 33.2, 23.2, 21.7; IR (neat): 2973, 2274, 2078, 1615, 1551, 1444, 1128, 827, 580, 544; HRESIMS Calcd for  $[\text{C}_{26}\text{H}_{23}\text{NNaO}_3\text{S}]^+$  ( $\text{M} + \text{Na}^+$ ) 452.1291, found 452.1291.

***N*-(3-(4-(dimethylamino)phenyl)prop-2-yn-1-yl)-4-methyl-*N*-(3-methylbut-3-en-1-yn-1-yl)benzenesulfonamide (1z)**

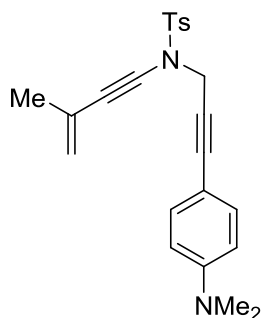

**1z**

Pale yellow oil.  $^1\text{H}$  NMR (400 MHz,  $\text{CDCl}_3$ )  $\delta$  7.86 (d,  $J = 8.4$  Hz, 2H), 7.28 (d,  $J = 8.0$  Hz, 2H), 7.11 – 6.99 (m, 2H), 6.58 – 6.47 (m, 2H), 5.19 (dd,  $J = 2.0, 0.8$  Hz, 1H), 5.13 (dd,  $J = 3.2, 1.6$  Hz, 1H), 4.47 (s, 2H), 2.95 (s, 6H), 2.37 (s, 3H), 1.87 (t,  $J = 1.2$  Hz, 3H);  $^{13}\text{C}$  NMR (100 MHz,  $\text{CDCl}_3$ )  $\delta$  150.2, 144.6, 134.2, 132.7, 129.4, 128.1, 126.0, 119.9, 111.4, 108.7, 87.5, 81.5, 78.7, 72.6, 43.1, 40.1, 23.5, 21.6; IR (neat): 2924, 2242, 2078, 1541, 1341, 1119, 726, 648, 624, 526, 505; HRESIMS Calcd for  $[\text{C}_{23}\text{H}_{24}\text{N}_2\text{NaO}_2\text{S}]^+$  ( $\text{M} + \text{Na}^+$ ) 415.1451, found 415.1456.



**(E)-N-(3-(4-(dimethylamino)phenyl)prop-2-yn-1-yl)-4-methyl-N-(3-methylpent-3-en-1-yn-1-yl)benzenesulfonamide (1aa)**

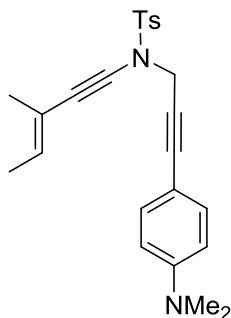

**1aa**

Pale yellow oil.  $^1\text{H}$  NMR (400 MHz,  $\text{CDCl}_3$ )  $\delta$  7.89 – 7.83 (m, 2H), 7.27 (d,  $J = 8.0$  Hz, 2H), 7.07 – 7.02 (m, 2H), 6.57 – 6.51 (m, 2H), 5.89 – 5.81 (m, 1H), 4.45 (s, 2H), 2.94 (s, 6H), 2.36 (s, 3H), 1.77 – 1.73 (m, 3H), 1.69 – 1.63 (m, 3H);  $^{13}\text{C}$  NMR (100 MHz,  $\text{CDCl}_3$ )  $\delta$  150.1, 144.4, 134.3, 132.7, 131.9, 129.3, 128.1, 117.6, 111.4, 108.8, 87.3, 78.8, 78.6, 73.9, 43.2, 40.0, 21.5, 17.1, 14.0; IR (neat): 2902, 2201, 2078, 1610, 1510, 1311, 1241, 1124, 1010, 804, 744, 513; HRESIMS Calcd for  $[\text{C}_{24}\text{H}_{26}\text{N}_2\text{NaO}_2\text{S}]^+$  ( $\text{M} + \text{Na}^+$ ) 429.1607, found 429.1607.

**(E)-N-(3-(4-(dimethylamino)phenyl)prop-2-yn-1-yl)-4-methyl-N-(3-methyl-4-phenylbut-3-en-1-yn-1-yl)benzenesulfonamide (1ab)**

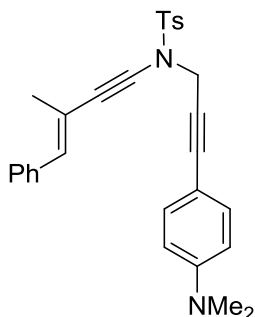

**1ab**

Pale yellow oil.  $^1\text{H}$  NMR (400 MHz,  $\text{CDCl}_3$ )  $\delta$  7.90 (d,  $J = 8.4$  Hz, 2H), 7.33 – 7.26 (m, 4H), 7.24 – 7.18 (m, 3H), 7.10 – 7.05 (m, 2H), 6.73 (s, 1H), 6.57 – 6.51 (m, 2H), 4.50 (s, 2H), 2.93 (s, 6H), 2.37 (s, 3H), 2.04 (d,  $J = 1.6$  Hz, 3H);  $^{13}\text{C}$  NMR (100 MHz,  $\text{CDCl}_3$ )  $\delta$  150.2, 144.6, 136.8, 134.5, 134.3, 132.7, 129.5, 128.8, 128.1, 126.9, 119.2, 111.4, 108.7, 87.6, 81.5, 78.8, 75.0, 43.2, 40.0, 21.6, 19.3; IR (neat): 2977, 2211, 2068, 1611, 1311,

1110, 1041, 710, 641, 542, 510; HRESIMS Calcd for  $[C_{29}H_{28}N_2NaO_2S]^+$  ( $M + Na^+$ ) 491.1764, found 491.1771.

***N*-(cyclohex-1-en-1-ylethynyl)-*N*-(3-(4-(dimethylamino)phenyl)prop-2-yn-1-yl)-4-methylbenzenesulfonamide (1ac)**

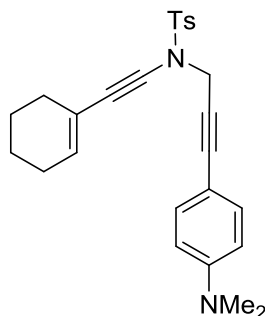

**1ac**

Pale yellow oil.  $^1H$  NMR (400 MHz,  $CDCl_3$ )  $\delta$  7.86 (d,  $J = 8.0$  Hz, 2H), 7.27 (d,  $J = 8.0$  Hz, 2H), 7.04 (d,  $J = 9.2$  Hz, 2H), 6.54 (d,  $J = 8.8$  Hz, 2H), 6.05 – 6.01 (m, 1H), 4.45 (s, 2H), 2.95 (s, 6H), 2.37 (s, 3H), 2.12 – 2.05 (m, 4H), 1.65 – 1.53 (m, 4H);  $^{13}C$  NMR (100 MHz,  $CDCl_3$ )  $\delta$  150.1, 144.4, 134.3, 132.7, 129.3, 128.1, 119.8, 111.4, 108.9, 87.3, 79.6, 78.8, 72.6, 43.2, 40.1, 29.4, 25.6, 22.3, 21.5, 21.4; IR (neat): 2914, 2202, 2087, 1640, 1640, 1571, 1372, 1210, 1070, 810, 640, 510; HRESIMS Calcd for  $[C_{26}H_{28}N_2NaO_2S]^+$  ( $M + Na^+$ ) 455.1764, found 455.1769.

***N*-(cyclohept-1-en-1-ylethynyl)-*N*-(3-(4-(dimethylamino)phenyl)prop-2-yn-1-yl)-4-methylbenzenesulfonamide (1ad)**

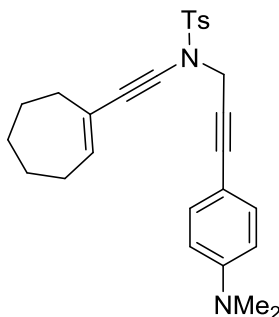

**1ad**

Pale yellow oil.  $^1H$  NMR (400 MHz,  $CDCl_3$ )  $\delta$  7.85 (d,  $J = 8.0$  Hz, 2H), 7.26 (d,  $J = 8.0$  Hz, 2H), 7.07 – 7.01 (m, 2H), 6.54 (d,  $J = 8.8$  Hz, 2H), 6.19 (t,  $J = 6.8$  Hz, 1H), 4.44 (s,

2H), 2.94 (s, 6H), 2.36 (s, 3H), 2.32 – 2.26 (m, 2H), 2.19 – 2.12 (m, 2H), 1.76 – 1.66 (m, 2H), 1.59 – 1.44 (m, 4H);  $^{13}\text{C}$  NMR (100 MHz,  $\text{CDCl}_3$ )  $\delta$  150.1, 144.4, 138.8, 134.3, 132.7, 129.3, 128.1, 125.9, 111.4, 108.8, 87.3, 79.7, 78.8, 74.3, 43.2, 40.0, 34.4, 32.0, 29.0, 26.5, 26.4, 21.5; IR (neat): 2910, 2210, 2078, 1647, 1370, 1275, 1166, 1065, 932, 745, 532; HRESIMS Calcd for  $[\text{C}_{27}\text{H}_{30}\text{N}_2\text{NaO}_2\text{S}]^+$  ( $\text{M} + \text{Na}^+$ ) 469.1920, found 469.1911.

***N*-(cyclooct-1-en-1-ylethynyl)-*N*-(3-(4-(dimethylamino)phenyl)prop-2-yn-1-yl)-4-methylbenzenesulfonamide (1ae)**

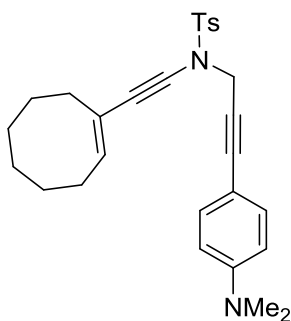

**1ae**

Pale yellow oil.  $^1\text{H}$  NMR (400 MHz,  $\text{CDCl}_3$ )  $\delta$  7.85 (d,  $J = 8.4$  Hz, 2H), 7.26 (d,  $J = 8.0$  Hz, 2H), 7.06 – 7.01 (m, 2H), 6.53 (d,  $J = 9.2$  Hz, 2H), 6.01 (t,  $J = 8.4$  Hz, 1H), 4.45 (s, 2H), 2.94 (s, 6H), 2.36 (s, 3H), 2.29 – 2.21 (m, 2H), 2.18 – 2.09 (m, 2H), 1.54 – 1.43 (m, 8H);  $^{13}\text{C}$  NMR (100 MHz,  $\text{CDCl}_3$ )  $\delta$  150.1, 144.4, 136.7, 134.2, 132.7, 129.3, 128.2, 122.8, 111.4, 108.8, 87.4, 79.4, 78.8, 73.3, 43.2, 40.1, 30.1, 29.7, 28.2, 26.9, 26.3, 25.7, 21.5; IR (neat): 2914, 2220, 2084, 1614, 1510, 1472, 1340, 1140, 845, 649, 544; HRESIMS Calcd for  $[\text{C}_{28}\text{H}_{32}\text{N}_2\text{NaO}_2\text{S}]^+$  ( $\text{M} + \text{Na}^+$ ) 483.2077, found 483.2079.

***N*-((1*H*-inden-2-yl)ethynyl)-*N*-(3-(4-(dimethylamino)phenyl)prop-2-yn-1-yl)-4-methylbenzenesulfonamide (1af)**

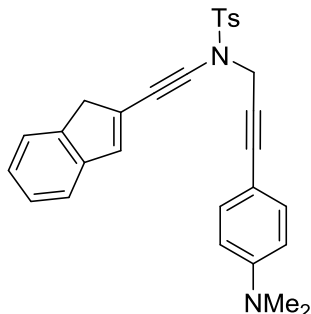

### 1af

Pale yellow oil.  $^1\text{H}$  NMR (400 MHz,  $\text{CDCl}_3$ )  $\delta$  7.89 (d,  $J = 8.4$  Hz, 2H), 7.35 – 7.23 (m, 5H), 7.20 – 7.14 (m, 1H), 7.09 – 7.03 (m, 2H), 6.96 (s, 1H), 6.53 (d,  $J = 8.8$  Hz, 2H), 4.53 (s, 2H), 3.47 (s, 2H), 2.93 (s, 6H), 2.36 (s, 3H);  $^{13}\text{C}$  NMR (100 MHz,  $\text{CDCl}_3$ )  $\delta$  150.2, 144.7, 144.1, 142.6, 136.0, 134.3, 132.7, 129.5, 128.1, 126.7, 126.6, 125.3, 123.4, 121.0, 111.4, 108.6, 87.7, 86.7, 78.7, 68.6, 43.2, 42.7, 40.0, 21.5; IR (neat): 2937, 2240, 2087, 1650, 1544, 1352, 1255, 1020, 850, 742, 610; HRESIMS Calcd for  $[\text{C}_{29}\text{H}_{26}\text{N}_2\text{NaO}_2\text{S}]^+$  ( $\text{M} + \text{Na}^+$ ) 489.1607, found 489.1600.

### *N*-(3-((2,6-diisopropylphenoxy)methyl)but-3-en-1-yn-1-yl)-*N*-(3-(4-(dimethylamino)phenyl)prop-2-yn-1-yl)-4-methylbenzenesulfonamide (1ag)

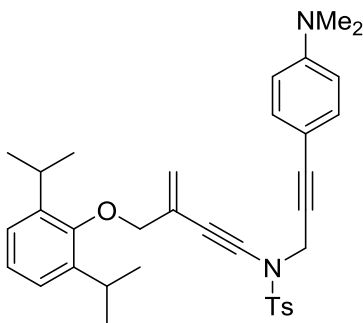

### 1ag

Pale yellow oil.  $^1\text{H}$  NMR (400 MHz,  $\text{CDCl}_3$ )  $\delta$  7.87 (d,  $J = 8.4$  Hz, 2H), 7.25 (d,  $J = 8.0$  Hz, 2H), 7.14 – 7.06 (m, 3H), 7.05 – 7.00 (m, 2H), 6.50 (d,  $J = 8.8$  Hz, 2H), 5.75 (d,  $J = 2.0$  Hz, 1H), 5.53 (d,  $J = 1.2$  Hz, 1H), 4.48 (s, 2H), 4.23 (s, 2H), 3.36 – 3.25 (m, 2H), 2.93 (s, 6H), 2.34 (s, 3H), 1.21 (d,  $J = 6.8$  Hz, 12H);  $^{13}\text{C}$  NMR (100 MHz,  $\text{CDCl}_3$ )  $\delta$  152.8, 150.2, 144.7, 141.8, 134.3, 132.7, 129.5, 128.1, 127.1, 124.7, 123.9, 120.1, 111.4, 108.6, 87.7, 83.2, 78.5, 75.5, 69.3, 43.1, 40.1, 26.4, 24.0, 21.5; IR (neat): 2947, 2814, 2221, 2058, 1700, 1578, 1341, 1101, 1037, 787, 617, 510; HRESIMS Calcd for  $[\text{C}_{35}\text{H}_{40}\text{N}_2\text{NaO}_3\text{S}]^+$  ( $\text{M} + \text{Na}^+$ ) 591.2652, found 591.2657.

### *N*-(3-((3,7-dimethyl-2,6-dioxo-2,3,6,7-tetrahydro-1*H*-purin-1-yl)methyl)but-3-en-1-yn-1-yl)-*N*-(3-(4-(dimethylamino)phenyl)prop-2-yn-1-yl)-4-methylbenzenesulfonamide (1ah)

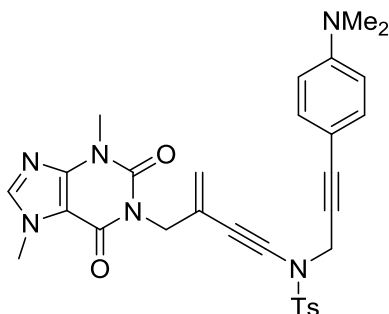

**1ah**

Pale yellow oil.  $^1\text{H}$  NMR (400 MHz,  $\text{CDCl}_3$ )  $\delta$  7.81 (d,  $J = 8.4$  Hz, 2H), 7.46 (s, 1H), 7.25 (d,  $J = 8.4$  Hz, 2H), 6.97 (d,  $J = 8.8$  Hz, 2H), 6.52 (d,  $J = 8.8$  Hz, 2H), 5.36 (d,  $J = 0.8$  Hz, 1H), 5.32 – 5.30 (m, 1H), 4.74 (s, 2H), 4.41 (s, 2H), 3.94 (s, 3H), 3.56 (s, 3H), 2.95 (s, 6H), 2.35 (s, 3H);  $^{13}\text{C}$  NMR (100 MHz,  $\text{CDCl}_3$ )  $\delta$  154.8, 151.2, 150.1, 148.8, 144.6, 141.5, 134.3, 132.6, 129.5, 128.0, 126.2, 119.3, 111.4, 108.5, 107.6, 87.4, 83.5, 78.5, 69.3, 44.6, 43.0, 40.0, 33.5, 29.6, 21.5; IR (neat): 2956, 2877, 2213, 2098, 1712(s), 1689(s), 1343, 1182, 1035, 747, 614, 532; HRESIMS Calcd for  $[\text{C}_{30}\text{H}_{30}\text{N}_6\text{NaO}_4\text{S}]^+$  ( $\text{M} + \text{Na}^+$ ) 593.1941, found 593.1945.

**(8*S*,9*S*,13*S*,14*S*)-17-(((*N*-(3-(4-methoxyphenyl)prop-2-yn-1-yl)-4-methylphenyl)sulfonamido)ethynyl)-13-methyl-7,8,9,11,12,13,14,15-octahydro-6*H*-cyclopenta[*a*]phenanthren-3-yl acetate (1ai)**

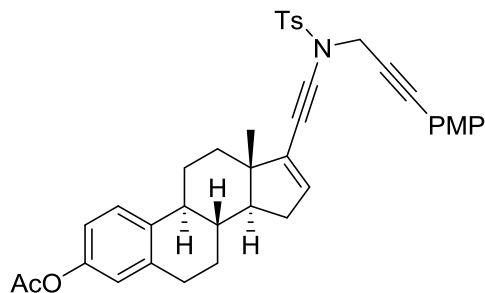

**1ai**

Pale yellow oil.  $[\alpha]_{\text{D}}^{20} = -34.5$  ( $c = 1.0$ ,  $\text{CHCl}_3$ ).  $^1\text{H}$  NMR (400 MHz,  $\text{CDCl}_3$ )  $\delta$  7.88 (d,  $J = 8.4$  Hz, 2H), 7.28 (d,  $J = 8.0$  Hz, 2H), 7.22 (d,  $J = 8.4$  Hz, 1H), 7.10 (d,  $J = 8.8$  Hz, 2H), 6.86 – 6.74 (m, 4H), 5.98 – 5.94 (m, 1H), 4.55 – 4.42 (m, 2H), 3.79 (s, 3H), 2.92 – 2.85 (m, 2H), 2.38 (s, 3H), 2.32 – 2.20 (m, 6H), 2.11 – 2.02 (m, 1H), 1.94 – 1.83 (m, 2H), 1.60 – 1.39 (m, 5H), 0.80 (s, 3H);  $^{13}\text{C}$  NMR (100 MHz,  $\text{CDCl}_3$ )  $\delta$  169.8, 159.7, 148.4, 144.6,

138.1, 136.3, 134.3, 134.2, 133.1, 129.4, 128.2, 126.0, 121.4, 118.5, 114.2, 113.7, 86.3, 85.3, 79.8, 66.9, 55.2, 48.5, 44.4, 43.1, 37.1, 34.5, 31.8, 29.4, 27.5, 26.2, 21.6, 21.1, 16.0; IR (neat): 2944, 2845, 2211, 2074, 1689(s), 1347, 1187, 1085, 787, 664, 644, 544; HRESIMS Calcd for  $[C_{39}H_{39}NNaO_5S]^+$  ( $M + Na^+$ ) 656.2441, found 656.2446.

***N*-(((8*R*,9*S*,10*R*,13*S*,14*S*)-10,13-dimethyl-1,2,6,7,8,9,10,11,12,13,14,15-dodecahydrospiro[cyclopenta[*a*]phenanthrene-3,2'-[1,3]dioxolan]-17-yl)ethynyl)-*N*-(3-(4-methoxyphenyl)prop-2-yn-1-yl)-4-methylbenzenesulfonamide (1aj)**

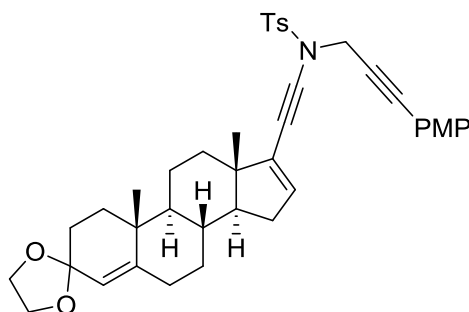

**1aj**

Pale yellow oil.  $[\alpha]_D^{20} = -41.2$  (c = 1.0,  $CHCl_3$ ).  $^1H$  NMR (400 MHz,  $CDCl_3$ )  $\delta$  7.87 (d,  $J = 8.4$  Hz, 2H), 7.28 (d,  $J = 6.4$  Hz, 2H), 7.08 (d,  $J = 8.8$  Hz, 2H), 6.77 (d,  $J = 8.8$  Hz, 2H), 5.95 – 5.90 (m, 1H), 5.37 – 5.32 (m, 1H), 4.54 – 4.26 (m, 2H), 3.99 – 3.88 (m, 4H), 3.79 (s, 3H), 2.61 – 2.53 (m, 1H), 2.37 (s, 3H), 2.20 – 2.08 (m, 2H), 2.05 – 1.95 (m, 2H), 1.83 – 1.62 (m, 6H), 1.56 – 1.29 (m, 5H), 1.18 – 1.08 (m, 1H), 1.04 (s, 3H), 0.81 (s, 3H);  $^{13}C$  NMR (100 MHz,  $CDCl_3$ )  $\delta$  159.7, 144.6, 140.4, 136.1, 134.4, 134.3, 133.1, 129.4, 128.2, 121.7, 114.1, 113.6, 109.3, 86.3, 85.1, 79.8, 66.9, 64.3, 64.2, 56.0, 55.2, 50.1, 48.2, 43.0, 41.7, 36.8, 36.2, 34.4, 32.1, 31.3, 31.0, 30.6, 21.5, 20.6, 18.7, 15.8; IR (neat): 2942, 2846, 2223, 2079, 1671, 1323, 1113, 1025, 747, 614, 600, 548; HRESIMS Calcd for  $[C_{40}H_{45}NNaO_5S]^+$  ( $M + Na^+$ ) 674.2911, found 674.2919.

***N*-(3-(4-(dimethylamino)phenyl)prop-2-yn-1-yl)-4-methyl-*N*-(3-(((4*S*,5'*R*,6*aR*,6*bS*,8*aS*,8*bR*,9*S*,10*R*,11*aS*,12*aS*,12*bS*)-5',6*a*,8*a*,9-tetramethyl-1,3,3',4,4',5,5',6,6*a*,6*b*,6',7,8,8*a*,8*b*,9,11*a*,12,12*a*,12*b*-icosahydrospiro[naphtho[2',1':4,5]indeno[2,1-*b*]furan-10,2'-pyran]-4-yl)oxy)methyl)but-3-en-1-yn-1-yl)benzenesulfonamide (1ak)**

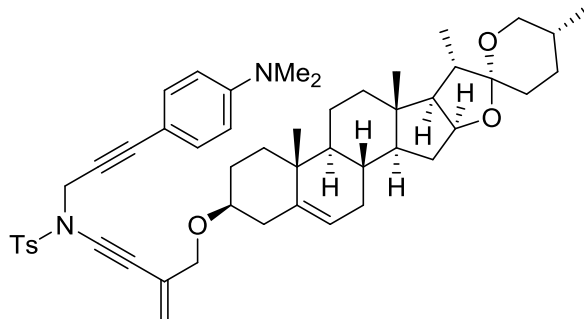

**1ak**

Pale yellow oil.  $[\alpha]_D^{20} = -88.4$  ( $c = 1.0$ ,  $\text{CHCl}_3$ ).  $^1\text{H NMR}$  (400 MHz,  $\text{CDCl}_3$ )  $\delta$  7.89 (d,  $J = 8.4$  Hz, 2H), 7.32 – 7.28 (m, 2H), 7.06 – 7.02 (m, 2H), 6.55 (d,  $J = 9.2$  Hz, 2H), 5.48 (d,  $J = 1.6$  Hz, 1H), 5.40 (d,  $J = 1.6$  Hz, 1H), 5.33 – 5.29 (m, 1H), 4.48 (s, 2H), 4.42 (dd,  $J = 15.0$ , 7.6 Hz, 1H), 4.01 (s, 2H), 3.52 – 3.33 (m, 2H), 3.29 – 3.15 (m, 1H), 2.96 (s, 6H), 2.39 (s, 3H), 2.38 – 2.31 (m, 1H), 2.28 – 2.15 (m, 1H), 2.04 – 1.94 (m, 2H), 1.93 – 1.71 (m, 6H), 1.70 – 1.57 (m, 5H), 1.57 – 1.39 (m, 5H), 1.37 – 1.27 (m, 2H), 1.20 – 1.05 (m, 2H), 1.00 (s, 3H), 0.99 (d,  $J = 7.0$  Hz, 3H), 0.84 – 0.76 (m, 6H);  $^{13}\text{C NMR}$  (100 MHz,  $\text{CDCl}_3$ )  $\delta$  150.1, 144.6, 140.8, 134.3, 132.8, 129.5, 128.5, 128.2, 121.2, 119.6, 111.4, 109.2, 108.7, 87.6, 83.0, 80.7, 78.7, 78.6, 69.9, 66.8, 62.1, 56.5, 50.0, 43.1, 41.5, 40.2, 40.1, 39.7, 39.0, 37.1, 36.9, 32.0, 31.8, 31.4, 31.3, 30.2, 28.7, 28.3, 21.6, 20.8, 19.3, 17.1, 16.2, 14.5; IR (neat): 2932, 2901, 2844, 2221, 2089, 1678, 1324, 1117, 1085, 872, 737, 644, 531; HRESIMS Calcd for  $[\text{C}_{50}\text{H}_{64}\text{N}_2\text{NaO}_5\text{S}]^+$  ( $\text{M} + \text{Na}^+$ ) 827.4428, found 827.4417.

**(*E*)-*N*-(cyclopent-1-en-1-ylethynyl)-*N*-(5-(4-methoxyphenyl)pent-4-en-2-yn-1-yl)-4-methylbenzenesulfonamide (1al)**

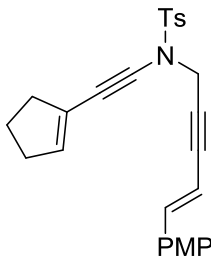

**1al**

Pale yellow oil.  $^1\text{H NMR}$  (400 MHz,  $\text{CDCl}_3$ )  $\delta$  7.86 (d,  $J = 8.0$  Hz, 2H), 7.33 (d,  $J = 8.0$  Hz, 2H), 7.25 (d,  $J = 8.8$  Hz, 2H), 6.85 (d,  $J = 8.8$  Hz, 2H), 6.65 (d,  $J = 16.4$  Hz, 1H), 5.98 – 5.95 (m, 1H), 5.82 – 5.75 (m, 1H), 4.43 (d,  $J = 1.6$  Hz, 2H), 3.80 (s, 3H), 2.48 –

2.37 (m, 7H), 1.93 – 1.83 (m, 2H);  $^{13}\text{C}$  NMR (100 MHz,  $\text{CDCl}_3$ )  $\delta$  160.3, 144.7, 141.9, 136.8, 134.4, 129.5, 128.7, 128.3, 127.6, 123.6, 114.2, 104.5, 86.0, 83.0, 82.6, 68.6, 55.3, 43.1, 36.6, 33.3, 23.2, 21.7; IR (neat): 2944, 2211, 2020, 1671, 1574, 1327, 1132, 1012, 872, 714, 512; HRESIMS Calcd for  $[\text{C}_{26}\text{H}_{25}\text{NNaO}_3\text{S}]^+$  ( $\text{M} + \text{Na}^+$ ) 454.1447, found 454.1447.

***N*-(cyclopent-1-en-1-ylethynyl)-4-methyl-*N*-(pent-2-yn-1-yl)benzenesulfonamide**

**(1am)**

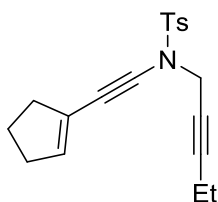

**1am**

Pale yellow oil.  $^1\text{H}$  NMR (400 MHz,  $\text{CDCl}_3$ )  $\delta$  7.84 (d,  $J = 8.4$  Hz, 2H), 7.33 (d,  $J = 8.4$  Hz, 2H), 6.00 – 5.90 (m, 1H), 4.22 (t,  $J = 2.0$  Hz, 2H), 2.46 – 2.37 (m, 7H), 2.05 – 1.96 (m, 2H), 1.94 – 1.86 (m, 2H), 0.96 (t,  $J = 7.6$  Hz, 3H);  $^{13}\text{C}$  NMR (100 MHz,  $\text{CDCl}_3$ )  $\delta$  144.5, 136.5, 134.4, 129.3, 128.2, 123.6, 88.5, 82.9, 71.4, 68.4, 42.5, 36.5, 33.1, 23.1, 21.6, 13.3, 12.2; IR (neat): 2947, 2215, 2055, 1744, 1512, 1374, 1111, 1045, 827, 642, 584; HRESIMS Calcd for  $[\text{C}_{19}\text{H}_{21}\text{NNaO}_2\text{S}]^+$  ( $\text{M} + \text{Na}^+$ ) 350.1185, found 350.1188.

***N*-(cyclopent-1-en-1-ylethynyl)-4-methyl-*N*-(prop-2-yn-1-yl)benzenesulfonamide**

**(1an)**

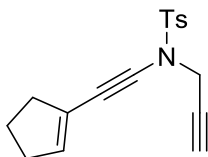

**1an**

Pale yellow oil.  $^1\text{H}$  NMR (400 MHz,  $\text{CDCl}_3$ )  $\delta$  7.83 (d,  $J = 8.0$  Hz, 2H), 7.34 (d,  $J = 8.4$  Hz, 2H), 6.02 – 5.91 (m, 1H), 4.27 (d,  $J = 2.4$  Hz, 2H), 2.45 (s, 3H), 2.43 – 2.37 (m, 4H), 2.20 (t,  $J = 2.4$  Hz, 1H), 1.93 – 1.84 (m, 2H);  $^{13}\text{C}$  NMR (100 MHz,  $\text{CDCl}_3$ )  $\delta$  144.8, 136.9, 134.0, 129.5, 128.1, 123.4, 82.4, 75.8, 74.5, 68.7, 41.7, 36.4, 33.2, 23.1, 21.6; IR



(neat): 3332, 2953, 2255, 2064, 1748, 1561, 1314, 1211, 1172, 1020, 812, 578;  
HRESIMS Calcd for  $[C_{17}H_{17}NNaO_2S]^+$  ( $M + Na^+$ ) 322.0872, found 322.0871.

[D<sub>3</sub>]-**1a** (91% D)

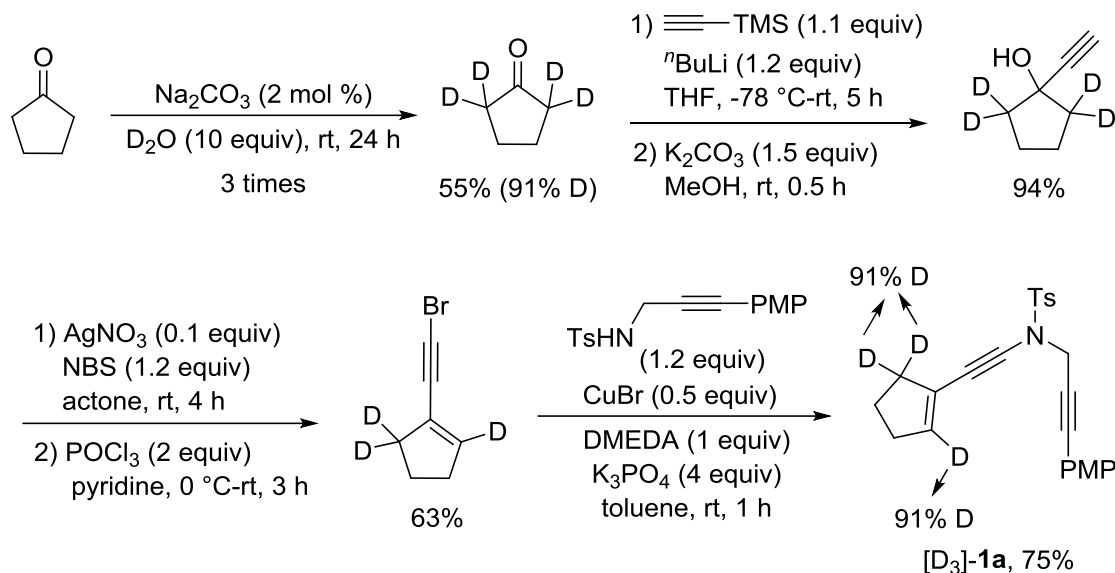

Compound [D<sub>3</sub>]-**1a** was prepared according to the known procedure<sup>3</sup>. <sup>1</sup>H NMR (400 MHz, CDCl<sub>3</sub>)  $\delta$  7.86 (d,  $J$  = 8.0 Hz, 2H), 7.27 (d,  $J$  = 8.4 Hz, 2H), 7.11 (d,  $J$  = 8.8 Hz, 2H), 6.77 (d,  $J$  = 8.8 Hz, 2H), 5.99 – 5.92 (m, 0.09H), 4.46 (s, 2H), 3.79 (s, 3H), 2.50 – 2.39 (m, 2.18H), 2.36 (s, 3H), 1.90 – 1.82 (m, 2H); <sup>13</sup>C NMR (100 MHz, CDCl<sub>3</sub>)  $\delta$  159.7, 144.6, 134.2, 133.1, 129.4, 128.1, 123.3, 114.1, 113.7, 86.3, 82.9, 79.8, 68.5, 55.2, 42.9, 33.0, 22.9, 21.5.

[D<sub>2</sub>]-**1a** (>99% D)

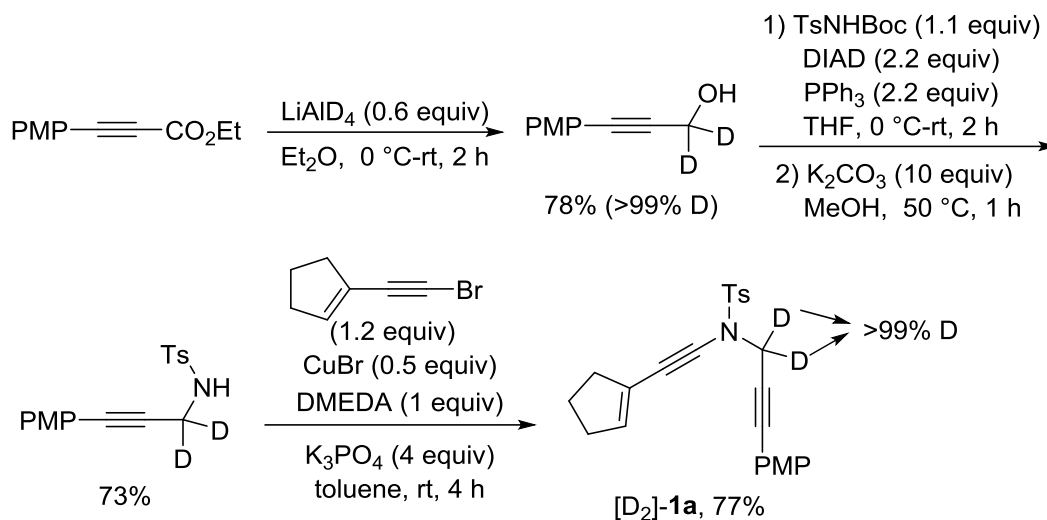

Compound [D<sub>2</sub>]-1a was prepared according to the known procedure<sup>4</sup>. <sup>1</sup>H NMR (400 MHz, CDCl<sub>3</sub>) δ 7.86 (d, *J* = 8.4 Hz, 2H), 7.27 (d, *J* = 8.4 Hz, 2H), 7.14 – 7.07 (m, 2H), 6.81 – 6.74 (m, 2H), 5.98 – 5.90 (m, 1H), 3.79 (s, 3H), 2.48 – 2.38 (m, 4H), 2.36 (s, 3H), 1.94 – 1.82 (m, 2H); <sup>13</sup>C NMR (100 MHz, CDCl<sub>3</sub>) δ 159.7, 144.6, 136.7, 134.2, 133.1, 129.4, 128.1, 123.5, 114.1, 113.7, 86.3, 82.9, 79.7, 68.5, 55.2, 36.4, 33.1, 23.1, 21.5.

### 3-(cyclopent-1-en-1-yl)-4-(diazophenylmethyl)-1-tosyl-1H-pyrrole

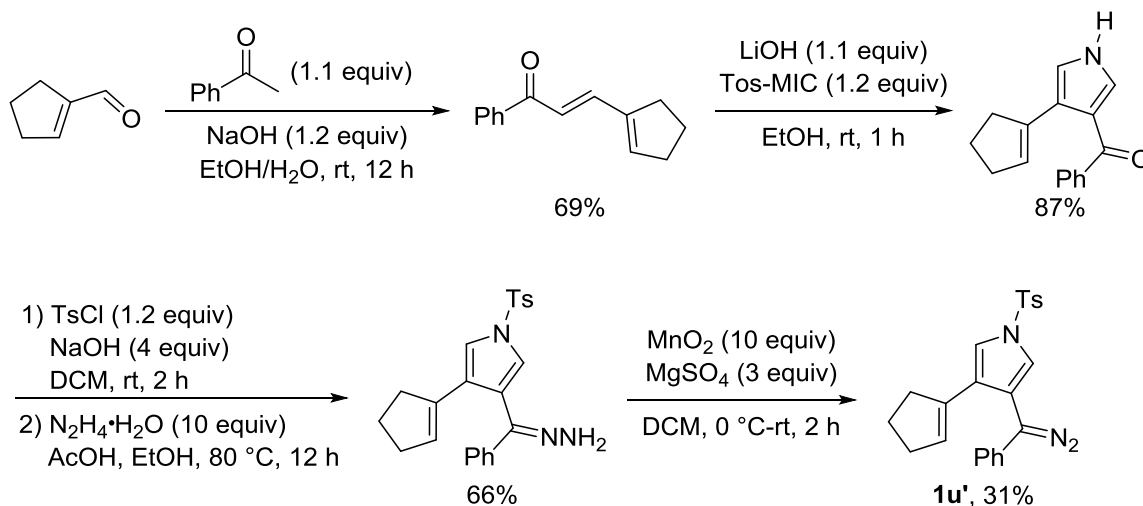

Compound 1u' was prepared according to the known procedures<sup>5,6</sup>. <sup>1</sup>H NMR (400 MHz, CDCl<sub>3</sub>) δ 7.79 (d, *J* = 8.4 Hz, 2H), 7.38 – 7.26 (m, 5H), 7.18 – 7.09 (m, 1H), 7.08 – 6.99 (m, 1H), 6.99 – 6.82 (m, 2H), 5.83 – 5.61 (m, 1H), 2.62 – 2.46 (m, 2H), 2.43 (s, 3H), 2.41 – 2.29 (m, 2H), 1.92 – 1.81 (m, 2H). HRESIMS Calcd for [C<sub>23</sub>H<sub>21</sub>N<sub>3</sub>NaO<sub>2</sub>S]<sup>+</sup> (M + Na<sup>+</sup>) 426.1247, found 426.1249.

## General procedure for the synthesis of chiral pyrroles 2:

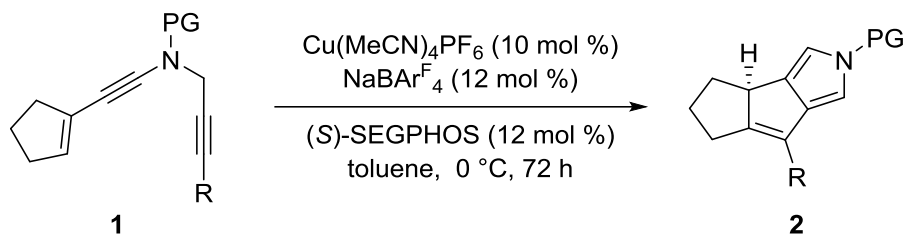

The powdered  $\text{Cu}(\text{MeCN})_4\text{PF}_6$  (0.02 mmol, 7.5 mg), (*S*)-SEGPHOS (0.024 mmol, 14.6 mg) and  $\text{NaBAR}_4^{\text{F}}$  (0.024 mmol, 21.3 mg) were introduced into an oven-dried Schlenk tube under argon atmosphere. After toluene (1 mL) was injected into the Schlenk tube, the solution was stirred at rt under the argon atmosphere for 0.5 h. Then the reaction was cooled to 0 °C, *N*-propargyl ynamide **1** (0.2 mmol) in toluene (1 mL) were introduced into the system dropwise. The resulting mixture was stirred at indicating temperature and the progress of the reaction was monitored by TLC. After concentration in vacuo, the residue was purified by flash chromatography on silica gel (eluent: hexanes/ethyl acetate) to give chiral pyrrole **2**.

### (*R*)-7-(4-methoxyphenyl)-2-tosyl-3b,4,5,6-tetrahydro-2*H*-pentaleno[1,2-*c*]pyrrole (**2a**)

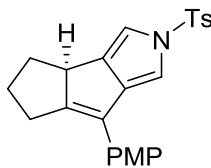

**2a**

Compound **2a** was prepared in 91% yield (73.7 mg) according to the general procedure. White solid (mp 101-102 °C).  $[\alpha]_{\text{D}}^{20} = -74.5^\circ$  ( $c = 1.0$ ,  $\text{CHCl}_3$ ). 93% ee (determined by HPLC: Chiralpak ASH Column, 15/85 *i*-PrOH/hexane, 1.0 mL/min, 254 nm; TR = 16.02 min (major), 25.00 min (minor)).  $^1\text{H}$  NMR (400 MHz,  $\text{CDCl}_3$ )  $\delta$  7.74 (d,  $J = 8.4$  Hz, 2H), 7.45 (d,  $J = 8.4$  Hz, 2H), 7.26 – 7.23 (m, 2H), 7.07 – 6.90 (m, 4H), 3.83 (s, 3H), 3.60 – 3.52 (m, 1H), 2.75 – 2.64 (m, 1H), 2.43 – 2.38 (m, 1H), 2.36 (s, 3H), 2.23 – 2.05 (m, 3H), 1.10 – 0.96 (m, 1H);  $^{13}\text{C}$  NMR (100 MHz,  $\text{CDCl}_3$ )  $\delta$  158.7, 157.8, 144.4, 141.5, 136.5, 134.9, 129.8, 128.4, 127.4, 127.3, 126.7, 113.9, 113.2, 107.7, 55.3, 49.6, 29.6, 27.8, 25.0,

21.5; IR (neat): 2999, 1684, 1518, 1290, 1188, 1068, 785, 771, 722, 552; HRESIMS Calcd for  $[C_{24}H_{23}NNaO_3S]^+$  ( $M + Na^+$ ) 428.1291, found 428.1295.

**(R)-7-(4-methoxyphenyl)-2-(phenylsulfonyl)-3b,4,5,6-tetrahydro-2H-pentaleno[1,2-c]pyrrole (2b)**

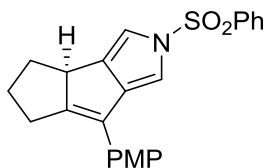

**2b**

Compound **2b** was prepared in 88% yield (68.8 mg) according to the general procedure. Colorless oil.  $[\alpha]_D^{20} = -18.2^\circ$  ( $c = 1.0$ ,  $CHCl_3$ ). 90% ee (determined by HPLC: Chiralpak ADH Column, 15/85 *i*-PrOH/hexane, 1.0 mL/min, 254 nm; TR = 18.03 min (major), 27.53 min (minor)).  $^1H$  NMR (400 MHz,  $CDCl_3$ )  $\delta$  7.86 (d,  $J = 7.6$  Hz, 2H), 7.52 – 7.42 (m, 5H), 7.09 – 6.91 (m, 4H), 3.82 (s, 3H), 3.60 – 3.53 (m, 1H), 2.75 – 2.65 (m, 1H), 2.43 – 2.35 (m, 1H), 2.22 – 2.04 (m, 3H), 1.12 – 0.96 (m, 1H);  $^{13}C$  NMR (100 MHz,  $CDCl_3$ )  $\delta$  158.7, 157.9, 141.6, 139.4, 135.1, 133.4, 129.2, 128.4, 127.4, 127.3, 126.6, 113.9, 113.3, 107.8, 55.2, 49.6, 29.5, 27.8, 25.0; IR (neat): 2923, 1610, 1544, 1422, 1342, 1020, 1020, 720, 525; HRESIMS Calcd for  $[C_{23}H_{21}NNaO_3S]^+$  ( $M + Na^+$ ) 414.1134, found 414.1136.

**(R)-7-(4-methoxyphenyl)-2-((4-methoxyphenyl)sulfonyl)-3b,4,5,6-tetrahydro-2H-pentaleno[1,2-c]pyrrole (2c)**

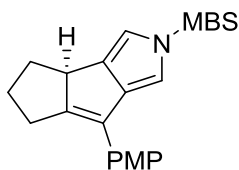

**2c**

Compound **2c** was prepared in 85% yield (71.6 mg) according to the general procedure. Pale yellow oil.  $[\alpha]_D^{20} = -57.0^\circ$  ( $c = 1.0$ ,  $CHCl_3$ ). 88% ee (determined by HPLC: Chiralpak IC Column, 30/70 *i*-PrOH/hexane, 1.0 mL/min, 254 nm; TR = 13.93 min (minor), 15.51 min (major)).  $^1H$  NMR (400 MHz,  $CDCl_3$ )  $\delta$  7.84 – 7.77 (m, 2H), 7.46 (d,  $J = 8.4$  Hz, 2H), 7.05 (d,  $J = 1.2$  Hz, 1H), 6.98 – 6.88 (m, 5H), 3.83 (s, 3H), 3.81 (s, 3H),

3.60 – 3.52 (m, 1H), 2.75 – 2.66 (m, 1H), 2.44 – 2.38 (m, 1H), 2.23 – 2.15 (m, 2H), 2.11 – 2.04 (m, 1H), 1.13 – 0.96 (m, 1H);  $^{13}\text{C}$  NMR (100 MHz,  $\text{CDCl}_3$ )  $\delta$  163.4, 158.7, 157.7, 141.4, 134.9, 131.0, 128.9, 128.4, 127.5, 127.4, 114.4, 113.9, 113.2, 107.7, 55.6, 55.3, 49.6, 29.6, 27.8, 25.0; IR (neat): 2950, 1611, 1502, 1442, 1310, 1242, 1002, 847, 755, 612, 514; HRESIMS Calcd for  $[\text{C}_{24}\text{H}_{23}\text{NNaO}_4\text{S}]^+$  ( $\text{M} + \text{Na}^+$ ) 444.1240, found 444.1247.

**(R)-2-((4-bromophenyl)sulfonyl)-7-(4-methoxyphenyl)-3b,4,5,6-tetrahydro-2H-pentaleno[1,2-c]pyrrole (2d)**

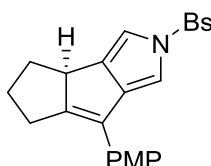

**2d**

Compound **2d** was prepared in 85% yield (79.7 mg) according to the general procedure. White solid (mp 188-189 °C).  $[\alpha]_{\text{D}}^{20} = -99.2^\circ$  ( $c = 1.0$ ,  $\text{CHCl}_3$ ). 92% ee (determined by HPLC: Chiralpak ASH Column, 15/85 *i*-PrOH/hexane, 1.0 mL/min, 254 nm; TR = 12.92 min (major), 15.94 min (minor)).  $^1\text{H}$  NMR (400 MHz,  $\text{CDCl}_3$ )  $\delta$  7.72 (d,  $J = 8.8$  Hz, 2H), 7.62 – 7.57 (m, 2H), 7.44 (d,  $J = 8.8$  Hz, 2H), 7.03 (d,  $J = 0.8$  Hz, 1H), 6.97 – 6.92 (m, 3H), 3.84 (s, 3H), 3.61 – 3.54 (m, 1H), 2.72 – 2.67 (m, 1H), 2.45 – 2.37 (m, 1H), 2.24 – 2.16 (m, 2H), 2.12 – 2.04 (m, 1H), 1.10 – 0.98 (m, 1H);  $^{13}\text{C}$  NMR (100 MHz,  $\text{CDCl}_3$ )  $\delta$  158.8, 158.2, 142.1, 138.3, 135.5, 132.5, 128.6, 128.4, 128.1, 127.3(1), 127.2(7), 113.9, 113.3, 107.7, 55.3, 49.6, 29.6, 27.8, 25.0; IR (neat): 2934, 1616, 1525, 1428, 1361, 1262, 1180, 1057, 757, 704, 574; HRESIMS Calcd for  $[\text{C}_{23}\text{H}_{20}\text{BrNNaO}_3\text{S}]^+$  ( $\text{M} + \text{Na}^+$ ) 492.0239, found 492.0237.

**(R)-7-(4-methoxyphenyl)-2-(naphthalen-2-ylsulfonyl)-3b,4,5,6-tetrahydro-2H-pentaleno[1,2-c]pyrrole (2e)**

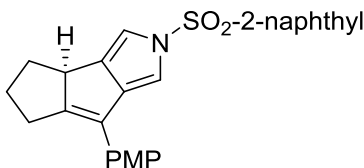

**2e**

Compound **2e** was prepared in 90% yield (79.4 mg) according to the general procedure. Pale yellow oil.  $[\alpha]_{\text{D}}^{20} = -45.0^{\circ}$  ( $c = 1.0$ ,  $\text{CHCl}_3$ ). 93% ee (determined by HPLC: Chiralpak ASH Column, 15/85 *i*-PrOH/hexane, 1.0 mL/min, 254 nm; TR = 21.39 min (major), 33.24 min (minor)).  $^1\text{H}$  NMR (400 MHz,  $\text{CDCl}_3$ )  $\delta$  8.48 (s, 1H), 7.96 – 7.79 (m, 4H), 7.63 – 7.58 (m, 2H), 7.45 (d,  $J = 8.8$  Hz, 2H), 7.13 (d,  $J = 1.2$  Hz, 1H), 7.06 – 7.02 (m, 1H), 6.97 – 6.91 (m, 2H), 3.83 (s, 3H), 3.59 – 3.51 (m, 1H), 2.69 – 2.65 (m, 1H), 2.40 – 2.35 (m, 1H), 2.23 – 2.12 (m, 2H), 2.10 – 2.03 (m, 1H), 1.09 – 0.94 (m, 1H);  $^{13}\text{C}$  NMR (100 MHz,  $\text{CDCl}_3$ )  $\delta$  158.7, 157.9, 141.7, 136.3, 135.1(1), 135.0(7), 132.0, 129.6, 129.4, 129.2, 128.4, 128.2, 127.9, 127.7, 127.5, 127.3, 121.6, 113.9, 113.3, 107.8, 55.3, 49.6, 29.6, 27.8, 25.0; IR (neat): 2935, 1634, 1555, 1312, 1240, 1044, 744, 703, 641, 574; HRESIMS Calcd for  $[\text{C}_{27}\text{H}_{23}\text{NNaO}_3\text{S}]^+$  ( $\text{M} + \text{Na}^+$ ) 464.1291, found 464.1294.

**(R)-7-(4-methoxyphenyl)-2-(thiophen-2-ylsulfonyl)-3b,4,5,6-tetrahydro-2H-pentaleno[1,2-*c*]pyrrole (2f)**

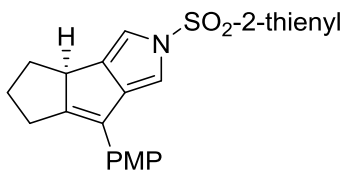

Compound **2f** was prepared in 87% yield (69.1 mg) according to the general procedure. Pale yellow oil.  $[\alpha]_{\text{D}}^{20} = -2.8^{\circ}$  ( $c = 1.0$ ,  $\text{CHCl}_3$ ). 89% ee (determined by HPLC: Chiralpak ADH Column, 15/85 *i*-PrOH/hexane, 1.0 mL/min, 254 nm; TR = 19.33 min (major), 31.46 min (minor)).  $^1\text{H}$  NMR (400 MHz,  $\text{CDCl}_3$ )  $\delta$  7.65 – 7.54 (m, 2H), 7.46 (d,  $J = 8.0$  Hz, 2H), 7.08 – 6.92 (m, 5H), 3.84 (s, 3H), 3.63 – 3.55 (m, 1H), 2.75 – 2.68 (m, 1H), 2.46 – 2.35 (m, 1H), 2.31 – 2.05 (m, 3H), 1.16 – 0.99 (m, 1H);  $^{13}\text{C}$  NMR (100 MHz,  $\text{CDCl}_3$ )  $\delta$  158.7, 158.2, 142.0, 139.8, 135.4, 133.1, 132.8, 128.4, 127.3, 113.9, 113.3, 107.7, 55.3, 49.6, 29.5, 27.8, 25.0; IR (neat): 2218, 1622, 1420, 1310, 1220, 1141, 1020, 700, 610, 510; HRESIMS Calcd for  $[\text{C}_{21}\text{H}_{19}\text{NNaO}_3\text{S}_2]^+$  ( $\text{M} + \text{Na}^+$ ) 420.0699, found 420.0702.

**(R)-7-(4-phenoxyphenyl)-2-tosyl-3b,4,5,6-tetrahydro-2H-pentaleno[1,2-*c*]pyrrole (2g)**

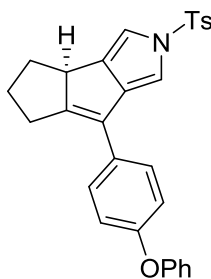

**2g**

Compound **2g** was prepared in 85% yield (79.4 mg) according to the general procedure. Pale yellow oil.  $[\alpha]_D^{20} = -52.3^\circ$  ( $c = 1.0$ ,  $\text{CHCl}_3$ ). 90% ee (determined by HPLC: Chiralpak ASH Column, 50/50 *i*-PrOH/hexane, 1.0 mL/min, 254 nm; TR = 9.79 min (major), 19.07 min (minor)).  $^1\text{H}$  NMR (400 MHz,  $\text{CDCl}_3$ )  $\delta$  7.75 (d,  $J = 8.4$  Hz, 2H), 7.48 (d,  $J = 8.8$  Hz, 2H), 7.37 – 7.29 (m, 2H), 7.27 – 7.24 (m, 2H), 7.14 – 6.96 (m, 7H), 3.62 – 3.54 (m, 1H), 2.75 – 2.65 (m, 1H), 2.45 – 2.38 (m, 1H), 2.36 (s, 3H), 2.24 – 2.05 (m, 3H), 1.11 – 0.98 (m, 1H);  $^{13}\text{C}$  NMR (100 MHz,  $\text{CDCl}_3$ )  $\delta$  158.9, 157.0, 156.3, 144.4, 141.3, 136.5, 134.8, 129.8(4), 129.8(0), 129.7, 128.6, 127.2, 126.7, 123.4, 119.0, 118.7, 113.3, 107.8, 49.8, 29.6, 27.8, 25.0, 21.5; IR (neat): 2244, 1611, 1410, 1302, 1241, 1141, 1070, 704, 652, 525; HRESIMS Calcd for  $[\text{C}_{29}\text{H}_{25}\text{NNaO}_3\text{S}]^+$  ( $\text{M} + \text{Na}^+$ ) 490.1447, found 490.1448.

**(R)-7-(4-(benzyloxy)phenyl)-2-tosyl-3b,4,5,6-tetrahydro-2H-pentaleno[1,2-c]pyrrole (2h)**

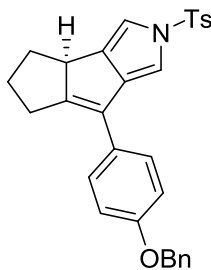

**2h**

Compound **2h** was prepared in 75% yield (72.1 mg) according to the general procedure except at 10 °C for 72 h. Pale yellow oil.  $[\alpha]_D^{20} = -87.6^\circ$  ( $c = 1.0$ ,  $\text{CHCl}_3$ ). 92% ee (determined by HPLC: Chiralpak ASH Column, 30/70 *i*-PrOH/hexane, 1.0 mL/min, 254 nm; TR = 15.97 min (major), 25.79 min (minor)).  $^1\text{H}$  NMR (400 MHz,  $\text{CDCl}_3$ )  $\delta$  7.74 (d,

$J = 8.4$  Hz, 2H), 7.47 – 7.30 (m, 7H), 7.25 – 7.22 (m, 2H), 7.08 – 6.95 (m, 4H), 5.08 (s, 2H), 3.58 – 3.51 (m, 1H), 2.74 – 2.64 (m, 1H), 2.42 – 2.37 (m, 1H), 2.35 (s, 3H), 2.21 – 2.11 (m, 2H), 2.10 – 2.03 (m, 1H), 1.09 – 0.96 (m, 1H);  $^{13}\text{C}$  NMR (100 MHz,  $\text{CDCl}_3$ )  $\delta$  157.9, 157.8, 144.4, 141.5, 136.9, 136.5, 134.9, 129.8, 128.5, 128.4, 127.9, 127.7, 127.4, 127.3, 126.7, 114.8, 113.2, 107.8, 70.0, 49.6, 29.6, 27.8, 25.0, 21.5; IR (neat): 2911, 2221, 1712, 1355, 1212, 1152, 1047, 952, 752; HRESIMS Calcd for  $[\text{C}_{30}\text{H}_{27}\text{NNaO}_3\text{S}]^+$  ( $\text{M} + \text{Na}^+$ ) 504.1604, found 504.1601.

**(*R*)-7-(4-((*tert*-butyldimethylsilyl)oxy)phenyl)-2-tosyl-3b,4,5,6-tetrahydro-2*H*-pentaleno[1,2-*c*]pyrrole (2i)**

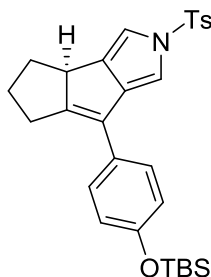

**2i**

Compound **2i** was prepared in 82% yield (82.4 mg) according to the general procedure except at 10 °C for 72 h. Pale yellow oil.  $[\alpha]_{\text{D}}^{20} = -84.7^\circ$  ( $c = 1.0$ ,  $\text{CHCl}_3$ ). 92% ee (determined by HPLC: Chiralpak ASH Column, 2/98 *i*-PrOH/hexane, 1.0 mL/min, 254 nm; TR = 9.08 min (major), 12.33 min (minor)).  $^1\text{H}$  NMR (500 MHz,  $\text{CDCl}_3$ )  $\delta$  7.74 (d,  $J = 8.5$  Hz, 2H), 7.39 (d,  $J = 8.5$  Hz, 2H), 7.26 – 7.22 (m, 2H), 7.07 – 6.95 (m, 2H), 6.90 – 6.85 (m, 2H), 3.59 – 3.52 (m, 1H), 2.73 – 2.65 (m, 1H), 2.43 – 2.37 (m, 1H), 2.36 (s, 3H), 2.21 – 2.06 (m, 3H), 1.12 – 0.98 (m, 10H), 0.22 (s, 6H);  $^{13}\text{C}$  NMR (125 MHz,  $\text{CDCl}_3$ )  $\delta$  157.9, 154.8, 144.4, 141.5, 136.5, 134.9, 129.8, 128.3, 127.9, 127.4, 126.6, 120.0, 113.2, 107.8, 49.6, 29.6, 27.8, 25.7, 25.0, 21.5, 18.2, -4.4; IR (neat): 2927, 2240, 1611, 1421, 1370, 611, 645, 575; HRESIMS Calcd for  $[\text{C}_{29}\text{H}_{35}\text{NNaO}_3\text{SSi}]^+$  ( $\text{M} + \text{Na}^+$ ) 528.1999, found 528.2007.

**(*R*)-2-tosyl-7-(4-((*triisopropylsilyl*)oxy)phenyl)-3b,4,5,6-tetrahydro-2*H*-pentaleno[1,2-*c*]pyrrole (2j)**



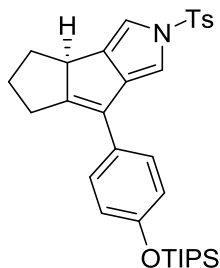

**2j**

Compound **2j** was prepared in 88% yield (96.3 mg) according to the general procedure. Pale yellow oil.  $[\alpha]_D^{20} = -75.1^\circ$  ( $c = 1.0$ ,  $\text{CHCl}_3$ ). 94% ee (determined by HPLC: Chiralpak ASH Column, 1/99 *i*-PrOH/hexane, 1.0 mL/min, 254 nm; TR = 6.23 min (minor), 10.87 min (major)).  $^1\text{H}$  NMR (400 MHz,  $\text{CDCl}_3$ )  $\delta$  7.74 (d,  $J = 8.4$  Hz, 2H), 7.38 (d,  $J = 8.4$  Hz, 2H), 7.27 – 7.22 (m, 2H), 7.05 (d,  $J = 1.2$  Hz, 1H), 6.98 – 6.88 (m, 3H), 3.60 – 3.52 (m, 1H), 2.75 – 2.65 (m, 1H), 2.45 – 2.39 (m, 1H), 2.37 (s, 3H), 2.23 – 2.14 (m, 2H), 2.13 – 2.06 (m, 1H), 1.34 – 1.21 (m, 3H), 1.13 – 1.00 (m, 19H);  $^{13}\text{C}$  NMR (100 MHz,  $\text{CDCl}_3$ )  $\delta$  157.7, 155.3, 144.4, 141.5, 136.6, 135.0, 129.8, 128.3, 127.7, 127.5, 126.7, 119.9, 113.2, 107.9, 49.7, 29.6, 27.8, 25.1, 21.5, 17.9, 12.7; IR (neat): 2925, 2214, 1612, 1310, 1242, 1110, 1041, 910, 610; HRESIMS Calcd for  $[\text{C}_{32}\text{H}_{41}\text{NNaO}_3\text{SSi}]^+$  ( $\text{M} + \text{Na}^+$ ) 570.2469, found 570.2462.

**(R)-4-(2-tosyl-3b,4,5,6-tetrahydro-2H-pentaleno[1,2-c]pyrrol-7-yl)phenyl acetate (2k)**

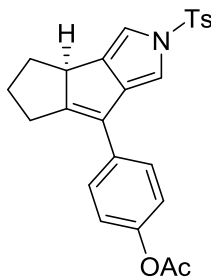

**2k**

Compound **2k** was prepared in 63% yield (54.5 mg) according to the general procedure except at 10 °C for 72 h. White solid (mp 114-115 °C).  $[\alpha]_D^{20} = -8.13^\circ$  ( $c = 1.0$ ,  $\text{CHCl}_3$ ). 84% ee (determined by HPLC: Chiralpak ASH Column, 20/80 *i*-PrOH/hexane, 1.0 mL/min, 254 nm; TR = 35.58 min (minor), 47.77 min (major)).  $^1\text{H}$  NMR (400 MHz,  $\text{CDCl}_3$ )  $\delta$  7.75 (d,  $J = 8.4$  Hz, 2H), 7.51 (d,  $J = 8.8$  Hz, 2H),

7.28 – 7.24 (m, 2H), 7.15 – 7.10 (m, 2H), 7.05 – 6.97 (m, 2H), 3.63 – 3.55 (m, 1H), 2.78 – 2.67 (m, 1H), 2.49 – 2.39 (m, 1H), 2.38 (s, 3H), 2.32 (s, 3H), 2.29 – 2.05 (m, 3H), 1.14 – 0.99 (m, 1H);  $^{13}\text{C}$  NMR (100 MHz,  $\text{CDCl}_3$ )  $\delta$  169.5, 160.0, 149.5, 144.5, 141.1, 136.4, 134.7, 132.5, 129.8, 128.2, 127.2, 126.7, 121.6, 113.3, 107.8, 49.8, 29.5, 27.8, 25.0, 21.5, 21.1; IR (neat): 2912, 2241, 1698(s), 1642, 1520, 1341, 1120, 1020, 820, 671, 542; HRESIMS Calcd for  $[\text{C}_{25}\text{H}_{23}\text{NNaO}_4\text{S}]^+$  ( $\text{M} + \text{Na}^+$ ) 456.1240, found 456.1240.

**(R)-7-(2-methoxyphenyl)-2-tosyl-3b,4,5,6-tetrahydro-2H-pentaleno[1,2-c]pyrrole (2l)**

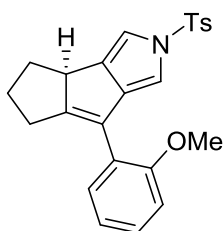

**2l**

Compound **2l** was prepared in 71% yield (57.5 mg) according to the general procedure except at 10 °C for 72 h. Pale yellow oil.  $[\alpha]_{\text{D}}^{20} = -21.3^\circ$  ( $c = 1.0$ ,  $\text{CHCl}_3$ ). 80% ee (determined by HPLC: Chiralpak ASH Column, 50/50 *i*-PrOH/hexane, 1.0 mL/min, 254 nm; TR = 6.53 min (major), 12.79 min (minor)).  $^1\text{H}$  NMR (400 MHz,  $\text{CDCl}_3$ )  $\delta$  7.71 (d,  $J = 8.4$  Hz, 2H), 7.45 – 7.40 (m, 1H), 7.30 – 7.21 (m, 3H), 7.01 – 6.91 (m, 3H), 6.83 (d,  $J = 1.2$  Hz, 1H), 3.81 (s, 3H), 3.65 – 3.57 (m, 1H), 2.57 – 2.50 (m, 1H), 2.37 (s, 3H), 2.22 – 2.05 (m, 4H), 1.19 – 1.08 (m, 1H);  $^{13}\text{C}$  NMR (100 MHz,  $\text{CDCl}_3$ )  $\delta$  161.8, 156.7, 144.3, 142.8, 136.6, 134.9, 129.7, 129.6, 128.6, 126.6, 124.2, 123.8, 120.4, 113.1, 111.0, 108.1, 55.1, 49.3, 28.8, 28.3, 25.1, 21.5; IR (neat): 2244, 1642, 1144, 1020, 1042, 777, 620, 542, 572; HRESIMS Calcd for  $[\text{C}_{24}\text{H}_{23}\text{NNaO}_3\text{S}]^+$  ( $\text{M} + \text{Na}^+$ ) 428.1291, found 428.1291.

**(R)-7-(4-methoxy-3-methylphenyl)-2-tosyl-3b,4,5,6-tetrahydro-2H-pentaleno[1,2-c]pyrrole (2m)**

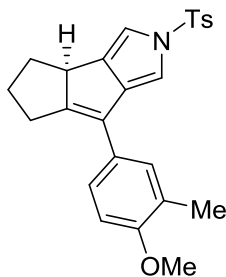

**2m**

Compound **2m** was prepared in 81% yield (67.9 mg) according to the general procedure. Pale yellow oil.  $[\alpha]_D^{20} = -7.47^\circ$  ( $c = 1.0$ ,  $\text{CHCl}_3$ ). 92% ee (determined by HPLC: Chiralpak ASH Column, 20/80 *i*-PrOH/hexane, 1.0 mL/min, 254 nm; TR = 8.85 min (major), 12.41 min (minor)).  $^1\text{H}$  NMR (400 MHz,  $\text{CDCl}_3$ )  $\delta$  7.74 (d,  $J = 8.0$  Hz, 2H), 7.34 – 7.21 (m, 4H), 7.07 – 7.03 (m, 1H), 6.98 – 6.94 (m, 1H), 6.85 (d,  $J = 8.4$  Hz, 1H), 3.84 (s, 3H), 3.58 – 3.51 (m, 1H), 2.75 – 2.65 (m, 1H), 2.41 – 2.38 (m, 1H), 2.36 (s, 3H), 2.26 (s, 3H), 2.23 – 2.14 (m, 2H), 2.12 – 2.03 (m, 1H), 1.09 – 0.96 (m, 1H);  $^{13}\text{C}$  NMR (100 MHz,  $\text{CDCl}_3$ )  $\delta$  157.5, 157.0, 144.4, 141.6, 136.5, 135.0, 129.8, 129.5, 127.5, 127.0, 126.7, 126.6, 125.8, 113.2, 109.9, 107.8, 55.3, 49.5, 29.5, 27.8, 25.0, 21.5, 16.3; IR (neat): 2220, 1610, 1320, 1149, 1024, 702, 612, 612, 548, 516; HRESIMS Calcd for  $[\text{C}_{25}\text{H}_{25}\text{NNaO}_3\text{S}]^+$  ( $\text{M} + \text{Na}^+$ ) 442.1447, found 442.1452.

**(R)-7-(3,4-dimethoxyphenyl)-2-tosyl-3b,4,5,6-tetrahydro-2H-pentaleno[1,2-c]pyrrole (2n)**

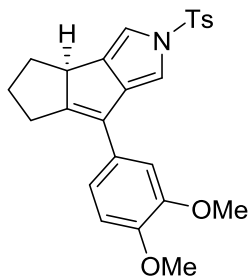

**2n**

Compound **2n** was prepared in 86% yield (74.8 mg) according to the general procedure. Pale yellow oil.  $[\alpha]_D^{20} = -8.21^\circ$  ( $c = 1.0$ ,  $\text{CHCl}_3$ ). 90% ee (determined by HPLC: Chiralpak ASH Column, 20/80 *i*-PrOH/hexane, 1.0 mL/min, 254 nm; TR = 15.67 min (major), 32.33 min (minor)).  $^1\text{H}$  NMR (400 MHz,  $\text{CDCl}_3$ )  $\delta$  7.74 (d,  $J = 8.4$  Hz, 2H), 7.24

(d,  $J = 8.4$  Hz, 2H), 7.12 – 7.02 (m, 3H), 7.00 – 6.89 (m, 2H), 3.91 (s, 3H), 3.90 (s, 3H), 3.60 – 3.53 (m, 1H), 2.77 – 2.67 (m, 1H), 2.50 – 2.39 (m, 1H), 2.36 (s, 3H), 2.26 – 2.05 (m, 3H), 1.12 – 0.98 (m, 1H);  $^{13}\text{C}$  NMR (100 MHz,  $\text{CDCl}_3$ )  $\delta$  158.1, 148.8, 148.3, 144.4, 141.4, 136.4, 134.9, 129.7, 127.7, 127.6, 126.6, 119.8, 113.3, 111.2, 110.6, 107.6, 55.9, 49.6, 29.5, 27.8, 25.0, 21.5; IR (neat): 2278, 1653, 1483, 1325, 1277, 1145, 1022, 784, 670, 577; HRESIMS Calcd for  $[\text{C}_{25}\text{H}_{25}\text{NNaO}_4\text{S}]^+$  ( $\text{M} + \text{Na}^+$ ) 458.1397, found 458.1393.

**(*R*)-7-(benzo[*d*][1,3]dioxol-5-yl)-2-tosyl-3b,4,5,6-tetrahydro-2*H*-pentaleno[1,2-*c*]pyrrole (2o)**

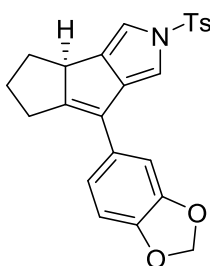

**2o**

Compound **2o** was prepared in 85% yield (71.2 mg) according to the general procedure except at 10 °C for 72 h. Pale yellow oil.  $[\alpha]_{\text{D}}^{20} = -20.3^\circ$  ( $c = 1.0$ ,  $\text{CHCl}_3$ ). 92% ee (determined by HPLC: Chiralpak ASH Column, 15/85 *i*-PrOH/hexane, 1.0 mL/min, 254 nm; TR = 18.76 min (major), 31.34 min (minor)).  $^1\text{H}$  NMR (400 MHz,  $\text{CDCl}_3$ )  $\delta$  7.75 (d,  $J = 8.4$  Hz, 2H), 7.25 (d,  $J = 8.0$  Hz, 2H), 7.04 – 6.95 (m, 4H), 6.85 (d,  $J = 8.4$  Hz, 1H), 5.98 (s, 2H), 3.60 – 3.52 (m, 1H), 2.74 – 2.64 (m, 1H), 2.43 – 2.39 (m, 1H), 2.37 (s, 3H), 2.23 – 2.04 (m, 3H), 1.11 – 0.97 (m, 1H);  $^{13}\text{C}$  NMR (100 MHz,  $\text{CDCl}_3$ )  $\delta$  158.4, 147.7, 146.6, 144.4, 141.4, 136.5, 134.7, 129.8, 129.0, 127.6, 126.7, 121.0, 113.3, 108.3, 107.7, 107.6, 101.0, 49.7, 29.5, 27.8, 25.0, 21.5; IR (neat): 2241, 1622, 1410, 1320, 1241, 1141, 1020, 740, 678, 552; HRESIMS Calcd for  $[\text{C}_{24}\text{H}_{21}\text{NNaO}_4\text{S}]^+$  ( $\text{M} + \text{Na}^+$ ) 442.1083, found 442.1080.

**(*R*)-*N,N*-dimethyl-4-(2-tosyl-3b,4,5,6-tetrahydro-2*H*-pentaleno[1,2-*c*]pyrrol-7-yl)aniline (2p)**

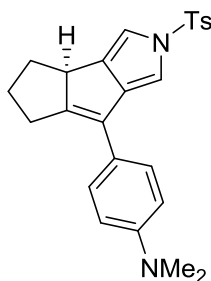

**2p**

Compound **2p** was prepared in 86% yield (71.9 mg) according to the general procedure. Pale yellow oil.  $[\alpha]_D^{20} = -12.5^\circ$  ( $c = 1.0$ ,  $\text{CHCl}_3$ ). 99% ee (determined by HPLC: Chiralpak IC Column, 20/80 *i*-PrOH/hexane, 1.0 mL/min, 254 nm; TR = 16.63 min (major), 21.24 min (minor)).  $^1\text{H NMR}$  (400 MHz,  $\text{CDCl}_3$ )  $\delta$  7.73 (d,  $J = 8.0$  Hz, 2H), 7.41 (d,  $J = 8.4$  Hz, 2H), 7.22 (d,  $J = 7.6$  Hz, 2H), 7.08 – 6.94 (m, 2H), 6.75 (d,  $J = 8.4$  Hz, 2H), 3.57 – 3.49 (m, 1H), 2.96 (s, 6H), 2.72 – 2.65 (m, 1H), 2.46 – 2.38 (m, 1H), 2.34 (s, 3H), 2.22 – 2.01 (m, 3H), 1.07 – 0.94 (m, 1H);  $^{13}\text{C NMR}$  (100 MHz,  $\text{CDCl}_3$ )  $\delta$  155.9, 149.5, 144.3, 141.8, 136.5, 135.2, 129.7, 128.1, 127.6, 126.6, 123.0, 113.1, 112.2, 107.8, 49.4, 40.4, 29.6, 27.9, 25.0, 21.5; IR (neat): 2944, 1633, 1555, 1342, 1222, 1171, 1077, 774, 574; HRESIMS Calcd for  $[\text{C}_{25}\text{H}_{26}\text{N}_2\text{NaO}_2\text{S}]^+$  ( $\text{M} + \text{Na}^+$ ) 441.1607, found 441.1601.

**(R)-N,N-dibenzyl-4-(2-tosyl-3b,4,5,6-tetrahydro-2H-pentaleno[1,2-c]pyrrol-7-yl)aniline (2q)**

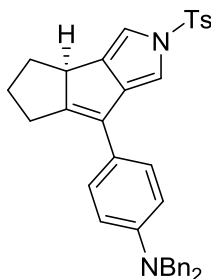

**2q**

Compound **2q** was prepared in 99% yield (112.8 mg) according to the general procedure. Pale yellow oil.  $[\alpha]_D^{20} = -17.8^\circ$  ( $c = 1.0$ ,  $\text{CHCl}_3$ ). 96% ee (determined by HPLC: Chiralpak IC Column, 30/70 *i*-PrOH/hexane, 1.0 mL/min, 254 nm; TR = 9.23 min (major), 10.45 min (minor)).  $^1\text{H NMR}$  (400 MHz,  $\text{CDCl}_3$ )  $\delta$  7.70 (d,  $J = 8.4$  Hz, 2H), 7.36 – 7.29 (m, 6H), 7.26 – 7.18 (m, 8H), 7.02 – 6.91 (m, 2H), 6.76 (d,  $J = 8.8$  Hz, 2H), 4.67

(s, 4H), 3.55 – 3.47 (m, 1H), 2.67 – 2.58 (m, 1H), 2.41 – 2.36 (m, 1H), 2.33 (s, 3H), 2.16 – 2.00 (m, 3H), 1.04 – 0.91 (m, 1H);  $^{13}\text{C}$  NMR (100 MHz,  $\text{CDCl}_3$ )  $\delta$  155.9, 148.1, 144.2, 141.7, 138.3, 136.5, 135.1, 129.7, 128.6, 128.3, 127.4, 126.9, 126.6(1), 126.5(6), 123.4, 113.1, 112.3, 107.8, 54.3, 49.5, 29.6, 27.9, 25.1, 21.5; IR (neat): 2955, 1635, 1545, 1322, 1247, 1174, 1014, 774, 578; HRESIMS Calcd for  $[\text{C}_{37}\text{H}_{34}\text{N}_2\text{NaO}_2\text{S}]^+$  ( $\text{M} + \text{Na}^+$ ) 593.2233, found 593.2238.

**(R)-N,N-bis(4-methoxybenzyl)-4-(2-tosyl-3b,4,5,6-tetrahydro-2H-pentaleno[1,2-c]pyrrol-7-yl)aniline (2r)**

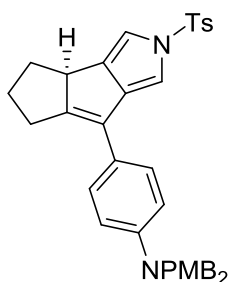

**2r**

Compound **2r** was prepared in 92% yield (116.2 mg) according to the general procedure. Pale yellow oil.  $[\alpha]_{\text{D}}^{20} = -36.8^\circ$  ( $c = 1.0$ ,  $\text{CHCl}_3$ ). 97% ee (determined by HPLC: Chiralpak IC Column, 30/70 *i*-PrOH/hexane, 1.0 mL/min, 254 nm; TR = 15.78 min (major), 16.92 min (minor)).  $^1\text{H}$  NMR (400 MHz,  $\text{CDCl}_3$ )  $\delta$  7.71 (d,  $J = 8.4$  Hz, 2H), 7.34 (d,  $J = 8.8$  Hz, 2H), 7.23 – 7.12 (m, 6H), 7.03 – 6.82 (m, 6H), 6.77 (d,  $J = 8.8$  Hz, 2H), 4.57 (s, 4H), 3.77 (s, 6H), 3.55 – 3.47 (m, 1H), 2.69 – 2.58 (m, 1H), 2.44 – 2.36 (m, 1H), 2.33 (s, 3H), 2.21 – 1.99 (m, 3H), 1.05 – 0.91 (m, 1H);  $^{13}\text{C}$  NMR (100 MHz,  $\text{CDCl}_3$ )  $\delta$  158.6, 155.8, 148.2, 144.2, 141.8, 136.5, 135.1, 130.3, 129.7, 128.2, 127.8, 127.5, 126.6, 123.2, 114.0, 113.0, 112.4, 107.8, 55.2, 53.5, 49.4, 29.6, 27.9, 25.1, 21.5; IR (neat): 2944, 1633, 1555, 1342, 1222, 1171, 1077, 774, 574; HRESIMS Calcd for  $[\text{C}_{39}\text{H}_{38}\text{N}_2\text{NaO}_4\text{S}]^+$  ( $\text{M} + \text{Na}^+$ ) 653.2444, found 653.2448.

**(R)-7-(4-(methylthio)phenyl)-2-tosyl-3b,4,5,6-tetrahydro-2H-pentaleno[1,2-c]pyrrole (2s)**

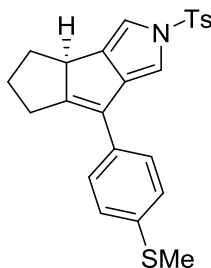

**2s**

Compound **2s** was prepared in 77% yield (64.8 mg) according to the general procedure. White solid (mp 108-109 °C).  $[\alpha]_D^{20} = -5.2^\circ$  (c = 1.0, CHCl<sub>3</sub>). 91% ee (determined by HPLC: Chiralpak ASH Column, 20/80 *i*-PrOH/hexane, 1.0 mL/min, 254 nm; TR = 14.70 min (major), 22.01 min (minor)). <sup>1</sup>H NMR (400 MHz, CDCl<sub>3</sub>) δ 7.75 (d, *J* = 8.4 Hz, 2H), 7.43 (d, *J* = 8.4 Hz, 2H), 7.30 – 7.25 (m, 4H), 7.10 – 6.96 (m, 2H), 3.62 – 3.54 (m, 1H), 2.75 – 2.70 (m, 1H), 2.50 (s, 3H), 2.45 – 2.40 (m, 1H), 2.37 (s, 3H), 2.26 – 2.02 (m, 3H), 1.12 – 0.98 (m, 1H); <sup>13</sup>C NMR (100 MHz, CDCl<sub>3</sub>) δ 159.5, 144.4, 141.1, 137.2, 136.5, 134.8, 131.6, 129.8, 127.6, 127.4, 126.7, 126.6, 113.3, 107.8, 49.8, 29.6, 27.8, 25.1, 21.5, 15.8; IR (neat): 2934, 1700, 1616, 1511, 1452, 1300, 1272, 1171, 712, 610, 577; HRESIMS Calcd for [C<sub>24</sub>H<sub>23</sub>NNaO<sub>2</sub>S<sub>2</sub>]<sup>+</sup> (M + Na<sup>+</sup>) 444.1062, found 444.1060.

**(R)-7-(*p*-tolyl)-2-tosyl-3b,4,5,6-tetrahydro-2H-pentaleno[1,2-*c*]pyrrole (2t)**

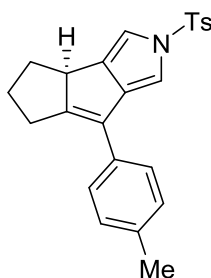

**2t**

Compound **2t** was prepared in 88% yield (68.5 mg) according to the general procedure except at 20 °C for 5 d. Pale yellow oil.  $[\alpha]_D^{20} = -38.1^\circ$  (c = 1.0, CHCl<sub>3</sub>). 73% ee (determined by HPLC: Chiralpak ASH Column, 10/90 *i*-PrOH/hexane, 1.0 mL/min, 254 nm; TR = 10.40 min (major), 15.67 min (minor)). <sup>1</sup>H NMR (400 MHz, CDCl<sub>3</sub>) δ 7.74 (d, *J* = 8.4 Hz, 2H), 7.41 (d, *J* = 8.0 Hz, 2H), 7.26 – 7.18 (m, 4H), 7.08 – 6.95 (m, 2H), 3.60 – 3.53 (m, 1H), 2.76 – 2.65 (m, 1H), 2.44 – 2.39 (m, 1H), 2.36 (s, 3H), 2.35 (s, 3H), 2.22

– 2.06 (m, 3H), 1.10 – 0.96 (m, 1H);  $^{13}\text{C}$  NMR (100 MHz,  $\text{CDCl}_3$ )  $\delta$  158.9, 144.4, 141.4, 136.8, 136.5, 134.9, 131.8, 129.8, 129.1, 127.7, 127.1, 126.7, 113.2, 107.9, 49.7, 29.5, 27.8, 25.0, 21.5, 21.2; IR (neat): 2922, 1652, 1520, 1371, 1220, 1171, 1020, 671, 622; HRESIMS Calcd for  $[\text{C}_{24}\text{H}_{23}\text{NNaO}_2\text{S}]^+$  ( $\text{M} + \text{Na}^+$ ) 412.1342, found 412.1340.

**(R)-7-phenyl-2-tosyl-3b,4,5,6-tetrahydro-2H-pentaleno[1,2-c]pyrrole (2u)**

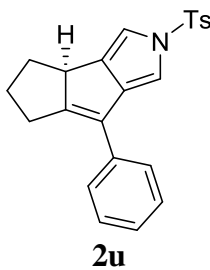

Compound **2u** was prepared in 73% yield (54.7 mg) according to the general procedure except at 20 °C for 5 d. Pale yellow oil.  $[\alpha]_{\text{D}}^{20} = -71.1^\circ$  ( $c = 1.0$ ,  $\text{CHCl}_3$ ). 64% ee (determined by HPLC: Chiralpak IC Column, 10/90 *i*-PrOH/hexane, 1.0 mL/min, 254 nm; TR = 11.65 min (minor), 12.81 min (major)).  $^1\text{H}$  NMR (400 MHz,  $\text{CDCl}_3$ )  $\delta$  7.67 (d,  $J = 8.4$  Hz, 2H), 7.43 (d,  $J = 7.6$  Hz, 2H), 7.35 – 7.28 (m, 2H), 7.22 – 7.14 (m, 3H), 7.02 – 6.98 (m, 1H), 6.92 – 6.88 (m, 1H), 3.54 – 3.46 (m, 1H), 2.69 – 2.60 (m, 1H), 2.44 – 2.30 (m, 1H), 2.27 (s, 3H), 2.17 – 1.97 (m, 3H), 1.02 – 0.90 (m, 1H);  $^{13}\text{C}$  NMR (100 MHz,  $\text{CDCl}_3$ )  $\delta$  159.9, 144.4, 141.2, 136.4, 134.8, 134.6, 129.8, 128.4, 127.9, 127.2, 127.1, 126.7, 113.2, 107.9, 49.8, 29.5, 27.7, 25.0, 21.5; IR (neat): 2912, 1744, 1614, 1520, 1371, 1141, 1020, 920, 620, 510; HRESIMS Calcd for  $[\text{C}_{23}\text{H}_{21}\text{NNaO}_2\text{S}]^+$  ( $\text{M} + \text{Na}^+$ ) 398.1185, found 398.1185.

**(R)-7-(4-bromophenyl)-2-tosyl-3b,4,5,6-tetrahydro-2H-pentaleno[1,2-c]pyrrole (2v)**

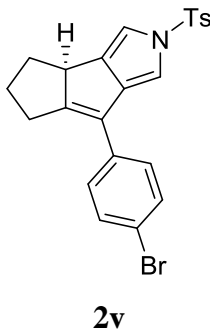



Compound **2v** was prepared in 61% yield (55.3 mg) according to the general procedure except at 20 °C for 5 d. Pale yellow oil.  $[\alpha]_{\text{D}}^{20} = -87.6^{\circ}$  ( $c = 1.0$ ,  $\text{CHCl}_3$ ). 56% ee (determined by HPLC: Chiralpak IC Column, 10/90 *i*-PrOH/hexane, 1.0 mL/min, 254 nm; TR = 11.75 min (major), 12.76 min (minor)).  $^1\text{H}$  NMR (400 MHz,  $\text{CDCl}_3$ )  $\delta$  7.76 (d,  $J = 8.4$  Hz, 2H), 7.66 – 7.60 (m, 1H), 7.48 – 7.38 (m, 2H), 7.31 – 7.26 (m, 3H), 7.07 – 6.98 (m, 2H), 3.65 – 3.56 (m, 1H), 2.78 – 2.70 (m, 1H), 2.48 – 2.43 (m, 1H), 2.38 (s, 3H), 2.26 – 2.16 (m, 2H), 2.14 – 2.09 (m, 1H), 1.13 – 0.99 (m, 1H);  $^{13}\text{C}$  NMR (100 MHz,  $\text{CDCl}_3$ )  $\delta$  161.4, 144.5, 140.7, 136.8, 134.5, 130.1, 130.0(0), 129.9(7), 129.9, 126.8, 125.8, 122.7, 113.5, 107.8, 50.0, 29.5, 27.8, 25.1, 21.5; IR (neat): 2972, 1620, 1541, 1352, 1241, 1142, 1042, 642, 610, 541; HRESIMS Calcd for  $[\text{C}_{23}\text{H}_{20}\text{BrNNaO}_2\text{S}]^+$  ( $\text{M} + \text{Na}^+$ ) 476.0290, found 476.0290.

**(*R*)-7-(thiophen-2-yl)-2-tosyl-3b,4,5,6-tetrahydro-2*H*-pentaleno[1,2-*c*]pyrrole (2w)**

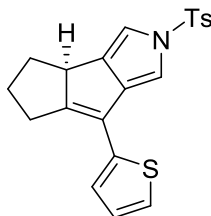

**2w**

Compound **2w** was prepared in 82% yield (62.5 mg) according to the general procedure except at 10 °C for 72 h. Pale yellow oil.  $[\alpha]_{\text{D}}^{20} = -69.0^{\circ}$  ( $c = 1.0$ ,  $\text{CHCl}_3$ ). 84% ee (determined by HPLC: Chiralpak ASH Column, 15/85 *i*-PrOH/hexane, 1.0 mL/min, 254 nm; TR = 11.63 min (major), 18.77 min (minor)).  $^1\text{H}$  NMR (400 MHz,  $\text{CDCl}_3$ )  $\delta$  7.75 (d,  $J = 8.4$  Hz, 2H), 7.29 – 7.22 (m, 3H), 7.16 (d,  $J = 3.2$  Hz, 1H), 7.12 – 7.07 (m, 2H), 6.99 – 6.95 (m, 1H), 3.65 – 3.57 (m, 1H), 2.64 – 2.51 (m, 2H), 2.37 (s, 3H), 2.27 – 2.06 (m, 3H), 1.15 – 1.00 (m, 1H);  $^{13}\text{C}$  NMR (100 MHz,  $\text{CDCl}_3$ )  $\delta$  158.6, 144.5, 141.0, 137.9, 136.4, 134.4, 129.8, 127.3, 126.7, 124.4, 124.3, 121.7, 113.3, 107.9, 50.0, 29.7, 28.1, 25.2, 21.5; IR (neat): 2278, 1675, 1485, 1312, 1220, 1148, 1055, 750, 672, 520; HRESIMS Calcd for  $[\text{C}_{21}\text{H}_{19}\text{NNaO}_2\text{S}_2]^+$  ( $\text{M} + \text{Na}^+$ ) 404.0749, found 404.0744.

**(*R*)-7-(thiophen-3-yl)-2-tosyl-3b,4,5,6-tetrahydro-2*H*-pentaleno[1,2-*c*]pyrrole (2x)**

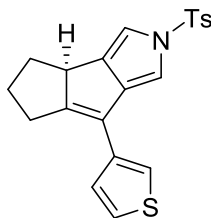

**2x**

Compound **2x** was prepared in 92% yield (70.1 mg) according to the general procedure except at 10 °C for 72 h. Pale yellow oil.  $[\alpha]_D^{20} = -104.3^\circ$  ( $c = 1.0$ ,  $\text{CHCl}_3$ ). 84% ee (determined by HPLC: Chiralpak ASH Column, 15/85 *i*-PrOH/hexane, 1.0 mL/min, 254 nm; TR = 12.51 min (major), 21.14 min (minor)).  $^1\text{H}$  NMR (400 MHz,  $\text{CDCl}_3$ )  $\delta$  7.74 (d,  $J = 8.4$  Hz, 2H), 7.37 – 7.24 (m, 5H), 7.04 (d,  $J = 1.2$  Hz, 1H), 6.99 – 6.95 (m, 1H), 3.62 – 3.53 (m, 1H), 2.66 – 2.62 (m, 1H), 2.51 – 2.42 (m, 1H), 2.37 (s, 3H), 2.25 – 2.08 (m, 3H), 1.13 – 0.99 (m, 1H);  $^{13}\text{C}$  NMR (100 MHz,  $\text{CDCl}_3$ )  $\delta$  158.5, 144.4, 141.6, 136.5, 136.0, 134.7, 129.8, 126.7, 125.6, 122.8, 121.4, 113.3, 107.6, 49.7, 29.6, 28.0, 24.9, 21.5; IR (neat): 2928, 1655, 1571, 1374, 1212, 1140, 1044, 641, 610; HRESIMS Calcd for  $[\text{C}_{21}\text{H}_{19}\text{NNaO}_2\text{S}_2]^+$  ( $\text{M} + \text{Na}^+$ ) 404.0749, found 404.0753.

**(R)-7-((4-methoxyphenyl)ethynyl)-2-tosyl-3b,4,5,6-tetrahydro-2H-pentaleno[1,2-c]pyrrole (2y)**

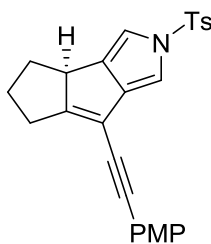

**2y**

Compound **2y** was prepared in 72% yield (61.8 mg) according to the general procedure. White solid (mp 106-108 °C).  $[\alpha]_D^{20} = -19.2^\circ$  ( $c = 1.0$ ,  $\text{CHCl}_3$ ). 90% ee (determined by HPLC: Chiralpak ADH Column, 30/70 *i*-PrOH/hexane, 1.0 mL/min, 254 nm; TR = 9.72 min (minor), 19.63 min (major)).  $^1\text{H}$  NMR (400 MHz,  $\text{CDCl}_3$ )  $\delta$  7.74 (d,  $J = 8.4$  Hz, 2H), 7.42 (d,  $J = 8.8$  Hz, 2H), 7.28 – 7.24 (m, 2H), 6.93 – 6.82 (m, 4H), 3.82 (s, 3H), 3.62 – 3.52 (m, 1H), 2.56 – 2.50 (m, 2H), 2.38 (s, 3H), 2.24 – 2.04 (m, 3H), 1.15 – 1.03 (m, 1H);  $^{13}\text{C}$  NMR (100 MHz,  $\text{CDCl}_3$ )  $\delta$  169.1, 159.6, 144.5, 141.6, 136.4, 133.9, 133.0, 129.8,

126.7, 115.3, 114.0, 113.4, 110.2, 107.6, 93.4, 81.7, 55.3, 49.2, 28.8, 28.2, 24.0, 21.5; IR (neat): 2933, 2201, 1648, 1571, 1367, 1285, 1172, 1041, 716, 625, 545; HRESIMS Calcd for  $[C_{26}H_{23}NNaO_3S]^+$  ( $M + Na^+$ ) 452.1291, found 452.1297.

**(S)-N,N-dimethyl-4-(2-tosyl-3b,4,5,6-tetrahydro-2H-pentaleno[1,2-c]pyrrol-7-yl)aniline (2z)**

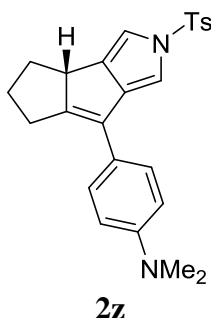

Compound **2z** was prepared in 88% yield (73.6 mg) according to the general procedure. Pale yellow oil.  $[\alpha]_D^{20} = +12.6^\circ$  ( $c = 1.0$ ,  $CHCl_3$ ). 99% ee (determined by HPLC: Chiralpak IC Column, 20/80 *i*-PrOH/hexane, 1.0 mL/min, 254 nm; TR = 16.23 min (minor), 20.33 min (major)).

**General procedure for the synthesis of chiral pyrroles 2aa-2al:**

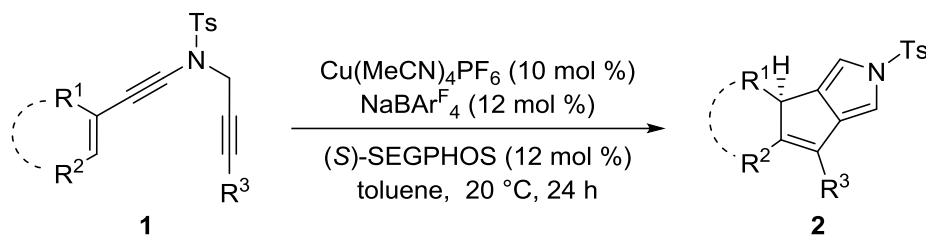

The powdered  $\text{Cu(MeCN)}_4\text{PF}_6$  (0.02 mmol, 7.5 mg), (S)-SEGPHOS (0.024 mmol, 14.6 mg) and  $\text{NaBARF}_4$  (0.024 mmol, 21.3 mg) were introduced into an oven-dried Schlenk tube under argon atmosphere. After toluene (1 mL) was injected into the Schlenk tube, the solution was stirred at rt under the argon atmosphere for 0.5 h. Then the reaction was cooled to 20 °C, *N*-propargyl ynamide **1** (0.2 mmol) in toluene (1 mL) were introduced into the system dropwise. The resulting mixture was stirred at indicating temperature and the progress of the reaction was monitored by TLC. After concentration in vacuo, the

residue was purified by flash chromatography on silica gel (eluent: hexanes/ethyl acetate) to give chiral pyrrole **2**.

**(R)-N,N-dimethyl-4-(6-methyl-2-tosyl-2,6-dihydrocyclopenta[c]pyrrol-4-yl)aniline (2aa)**

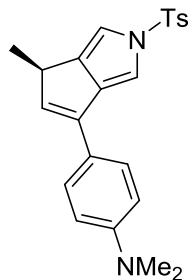

**2aa**

Compound **2aa** was prepared in 70% yield (54.9 mg) according to the general procedure. Pale yellow oil.  $[\alpha]_D^{20} = -78.4^\circ$  ( $c = 1.0$ ,  $\text{CHCl}_3$ ). 90% ee (determined by HPLC: Chiralpak ADH Column, 40/60 *i*-PrOH/hexane, 1.0 mL/min, 254 nm; TR = 14.18 min (minor), 21.69 min (major)).  $^1\text{H}$  NMR (400 MHz,  $\text{CDCl}_3$ )  $\delta$  7.74 (d,  $J = 8.4$  Hz, 2H), 7.52 – 7.45 (m, 2H), 7.24 (d,  $J = 8.0$  Hz, 2H), 7.17 (d,  $J = 1.6$  Hz, 1H), 6.98 – 6.94 (m, 1H), 6.74 (d,  $J = 8.8$  Hz, 2H), 6.32 (d,  $J = 2.4$  Hz, 1H), 3.54 – 3.46 (m, 1H), 2.98 (s, 6H), 2.36 (s, 3H), 1.25 (d,  $J = 7.2$  Hz, 3H);  $^{13}\text{C}$  NMR (100 MHz,  $\text{CDCl}_3$ )  $\delta$  150.2, 144.4, 140.4, 137.1, 136.5, 136.4, 135.5, 129.8, 127.1, 126.7, 122.8, 112.3, 111.5, 109.1, 40.5, 38.0, 21.5, 18.1; IR (neat): 2922, 1671, 1572, 1312, 1172, 1072, 1072, 620, 544; HRESIMS Calcd for  $[\text{C}_{23}\text{H}_{24}\text{N}_2\text{NaO}_2\text{S}]^+$  ( $\text{M} + \text{Na}^+$ ) 415.1451, found 415.1458.

**(R)-4-(5,6-dimethyl-2-tosyl-2,6-dihydrocyclopenta[c]pyrrol-4-yl)-N,N-dimethylaniline (2ab)**

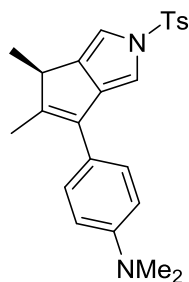

**2ab**

Compound **2ab** was prepared in 88% yield (72.7 mg) according to the general procedure. Pale yellow oil.  $[\alpha]_D^{20} = -74.0^\circ$  ( $c = 1.0$ ,  $\text{CHCl}_3$ ). 90% ee (determined by HPLC: Chiralpak ODH Column, 30/70 *i*-PrOH/hexane, 1.0 mL/min, 254 nm; TR = 6.18 min (minor), 7.55 min (major)).  $^1\text{H}$  NMR (400 MHz,  $\text{CDCl}_3$ )  $\delta$  7.71 (d,  $J = 8.4$  Hz, 2H), 7.37 – 7.31 (m, 2H), 7.21 (d,  $J = 8.0$  Hz, 2H), 6.94 – 6.88 (m, 2H), 6.79 – 6.73 (m, 2H), 3.26 (q,  $J = 7.2$  Hz, 1H), 2.97 (s, 6H), 2.34 (s, 3H), 2.02 (s, 3H), 1.26 (d,  $J = 7.6$  Hz, 3H);  $^{13}\text{C}$  NMR (100 MHz,  $\text{CDCl}_3$ )  $\delta$  149.5, 145.7, 144.2, 139.6, 138.5, 136.5, 130.3, 129.7, 128.8, 126.6, 123.4, 112.3, 112.2, 107.5, 41.9, 40.4, 21.5, 17.2, 13.8; IR (neat): 2198, 1632, 1511, 1321, 1202, 1141, 1040, 1046, 644, 510; HRESIMS Calcd for  $[\text{C}_{24}\text{H}_{26}\text{N}_2\text{NaO}_2\text{S}]^+$  ( $\text{M} + \text{Na}^+$ ) 429.1607, found 429.1608.

**(*R*)-*N,N*-dimethyl-4-(6-methyl-5-phenyl-2-tosyl-2,6-dihydrocyclopenta[*c*]pyrrol-4-yl)aniline (**2ac**)**

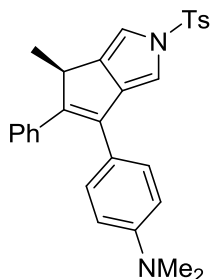

**2ac**

Compound **2ac** was prepared in 82% yield (77.2 mg) according to the general procedure. Pale yellow oil.  $[\alpha]_D^{20} = -101.0^\circ$  ( $c = 1.0$ ,  $\text{CHCl}_3$ ). 93% ee (determined by HPLC: Chiralpak ADH Column, 30/70 *i*-PrOH/hexane, 1.0 mL/min, 254 nm; TR = 8.21 min (major), 10.65 min (minor)).  $^1\text{H}$  NMR (400 MHz,  $\text{CDCl}_3$ )  $\delta$  7.74 (d,  $J = 8.4$  Hz, 2H), 7.26 – 7.17 (m, 9H), 7.07 – 7.01 (m, 2H), 6.60 (d,  $J = 8.8$  Hz, 2H), 3.92 – 3.84 (m, 1H), 2.93 (s, 6H), 2.35 (s, 3H), 1.14 (d,  $J = 7.2$  Hz, 3H);  $^{13}\text{C}$  NMR (100 MHz,  $\text{CDCl}_3$ )  $\delta$  149.5, 147.7, 144.4, 139.4, 138.2, 136.8, 136.4, 131.6, 129.8, 129.4, 129.1, 128.2, 126.7, 122.9, 112.4, 111.9, 109.1, 40.9, 40.3, 21.5, 17.6; IR (neat): 2278, 1614, 1555, 1320, 1241, 1171, 1002, 671, 602, 571; HRESIMS Calcd for  $[\text{C}_{29}\text{H}_{28}\text{N}_2\text{NaO}_2\text{S}]^+$  ( $\text{M} + \text{Na}^+$ ) 491.1764, found 491.1765.

**(R)-N,N-dimethyl-4-(2-tosyl-2,3b,4,5,6,7-hexahydroindeno[1,2-c]pyrrol-8-yl)aniline (2ad)**

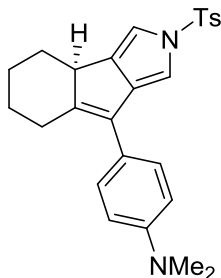

**2ad**

Compound **2ad** was prepared in 81% yield (70.2 mg) according to the general procedure except using 2-Me-THF as the solvent. Pale yellow oil.  $[\alpha]_D^{20} = -74.7^\circ$  ( $c = 1.0$ ,  $\text{CHCl}_3$ ). 83% ee (determined by HPLC: Chiralpak ODH Column, 30/70 *i*-PrOH/hexane, 1.0 mL/min, 254 nm; TR = 6.51 min (minor), 7.98 min (major)).  $^1\text{H NMR}$  (400 MHz,  $\text{CDCl}_3$ )  $\delta$  7.70 (d,  $J = 8.4$  Hz, 2H), 7.36 – 7.29 (m, 2H), 7.21 (d,  $J = 8.0$  Hz, 2H), 6.94 – 6.90 (m, 2H), 6.76 (d,  $J = 8.8$  Hz, 2H), 3.16 – 3.09 (m, 1H), 3.03 – 2.95 (m, 7H), 2.34 (s, 3H), 2.32 – 2.19 (m, 2H), 1.88 – 1.73 (m, 2H), 1.56 – 1.44 (m, 1H), 1.27 – 1.10 (m, 2H);  $^{13}\text{C NMR}$  (100 MHz,  $\text{CDCl}_3$ )  $\delta$  149.5, 148.4, 144.2, 139.9, 137.2, 136.5, 129.7, 128.9, 127.9, 126.6, 123.2, 112.2(9), 112.2(6), 107.6, 44.6, 40.5, 33.1, 27.7, 27.4, 25.5, 21.5; IR (neat): 2947, 1641, 1520, 1372, 1272, 1200, 1071, 913, 776, 516; HRESIMS Calcd for  $[\text{C}_{26}\text{H}_{28}\text{N}_2\text{NaO}_2\text{S}]^+$  ( $\text{M} + \text{Na}^+$ ) 455.1764, found 455.1775.

**(R)-N,N-dimethyl-4-(2-tosyl-3b,4,5,6,7,8-hexahydro-2H-azuleno[1,2-c]pyrrol-9-yl)aniline (2ae)**

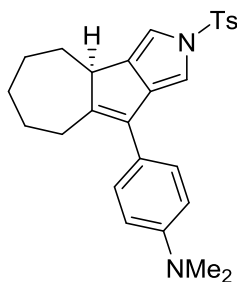

**2ae**

Compound **2ae** was prepared in 91% yield (81.1 mg) according to the general procedure except using 2-Me-THF as the solvent. Pale yellow oil.  $[\alpha]_D^{20} = -24.0^\circ$  ( $c = 1.0$ ,  $\text{CHCl}_3$ ).

95% ee (determined by HPLC: Chiralpak ADH Column, 30/70 *i*-PrOH/hexane, 1.0 mL/min, 254 nm; TR = 9.01 min (minor), 17.37 min (major)). <sup>1</sup>H NMR (400 MHz, CDCl<sub>3</sub>) δ 7.70 (d, *J* = 8.4 Hz, 2H), 7.40 – 7.35 (m, 2H), 7.22 (d, *J* = 8.4 Hz, 2H), 6.91 – 6.85 (m, 2H), 6.76 (d, *J* = 8.8 Hz, 2H), 3.47 – 3.40 (m, 1H), 2.97 (s, 6H), 2.76 – 2.71 (m, 2H), 2.35 (s, 3H), 2.17 – 2.12 (m, 1H), 1.94 – 1.74 (m, 5H), 1.65 – 1.53 (m, 2H); <sup>13</sup>C NMR (100 MHz, CDCl<sub>3</sub>) δ 151.1, 149.3, 144.2, 139.8, 138.3, 136.6, 129.8, 129.7, 128.7, 126.6, 123.8, 112.1, 107.4, 47.4, 40.4, 34.2, 30.6, 29.4, 27.0, 21.5; IR (neat): 2258, 1620, 1510, 1314, 1255, 1289, 1094, 1046, 676, 523; HRESIMS Calcd for [C<sub>27</sub>H<sub>30</sub>N<sub>2</sub>NaO<sub>2</sub>S]<sup>+</sup> (M + Na<sup>+</sup>) 469.1920, found 469.1928.

**(*R*)-*N,N*-dimethyl-4-(2-tosyl-2,3b,4,5,6,7,8,9-octahydrocycloocta[3,4]cyclopenta[1,2-*c*]pyrrol-10-yl)aniline (2af)**

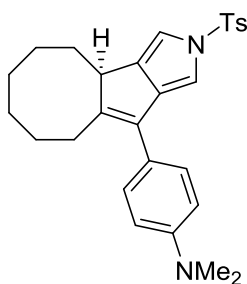

**2af**

Compound **2af** was prepared in 93% yield (85.8 mg) according to the general procedure except using 2-Me-THF as the solvent. Pale yellow oil. [ $\alpha$ ]<sub>D</sub><sup>20</sup> = -22.1 °(c = 1.0, CHCl<sub>3</sub>). 93% ee (determined by HPLC: Chiralpak ADH Column, 20/80 *i*-PrOH/hexane, 1.0 mL/min, 254 nm; TR = 14.03 min (minor), 26.78 min (major)). <sup>1</sup>H NMR (400 MHz, CDCl<sub>3</sub>) δ 7.69 (d, *J* = 8.4 Hz, 2H), 7.39 – 7.33 (m, 2H), 7.21 (d, *J* = 8.0 Hz, 2H), 6.90 – 6.85 (m, 2H), 6.79 – 6.72 (m, 2H), 3.46 – 3.41 (m, 1H), 2.97 (s, 6H), 2.94 – 2.85 (m, 1H), 2.35 (s, 3H), 2.25 – 2.16 (m, 1H), 1.85 – 1.76 (m, 1H), 1.73 – 1.56 (m, 3H), 1.52 – 1.34 (m, 6H); <sup>13</sup>C NMR (100 MHz, CDCl<sub>3</sub>) δ 150.3, 149.4, 144.2, 140.4, 137.0, 136.6, 131.6, 129.6, 128.5, 126.6, 124.0, 112.2, 107.7, 46.9, 40.4, 28.6, 28.4, 27.7, 26.7, 25.7, 24.4, 21.5; IR (neat): 2924, 1620, 1530, 1332, 1120, 1074, 920, 721, 527, 504; HRESIMS Calcd for [C<sub>28</sub>H<sub>32</sub>N<sub>2</sub>NaO<sub>2</sub>S]<sup>+</sup> (M + Na<sup>+</sup>) 483.2077, found 483.2084.

**(R)-N,N-dimethyl-4-(2-tosyl-3b,4-dihydro-2H-benzo[4,5]pentaleno[1,2-c]pyrrol-9-yl)aniline (2ag)**

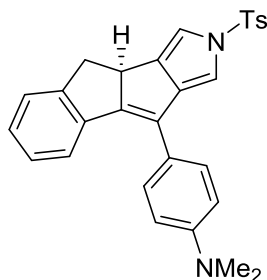

**2ag**

Compound **2ag** was prepared in 91% yield (85.0 mg) according to the general procedure except at 0 °C for 48 h. Pale yellow oil.  $[\alpha]_D^{20} = -27.5^\circ$  ( $c = 1.0$ ,  $\text{CHCl}_3$ ). 95% ee (determined by HPLC: Chiralpak IC Column, 20/80 *i*-PrOH/hexane, 1.0 mL/min, 254 nm; TR = 14.79 min (major), 16.31 min (minor)).  $^1\text{H NMR}$  (400 MHz,  $\text{CDCl}_3$ )  $\delta$  7.77 – 7.67 (m, 3H), 7.55 (d,  $J = 8.0$  Hz, 2H), 7.26 – 7.23 (m, 3H), 7.15 – 6.96 (m, 4H), 6.79 (d,  $J = 8.4$  Hz, 2H), 4.31 (t,  $J = 8.4$  Hz, 1H), 3.23 (dd,  $J = 14.8, 8.4$  Hz, 1H), 3.00 (s, 6H), 2.71 (dd,  $J = 14.4, 9.2$  Hz, 1H), 2.35 (s, 3H);  $^{13}\text{C NMR}$  (100 MHz,  $\text{CDCl}_3$ )  $\delta$  152.2, 150.1, 150.0, 144.5, 144.0, 137.1, 136.4, 134.0, 129.8, 129.1, 128.6, 127.3, 126.7(2), 126.6(7), 125.5, 122.6, 121.9, 113.3, 112.0, 109.1, 51.2, 40.4, 33.8, 21.5; IR (neat): 2921, 1640, 1574, 1320, 1220, 1141, 1075, 677, 646, 570; HRESIMS Calcd for  $[\text{C}_{29}\text{H}_{26}\text{N}_2\text{NaO}_2\text{S}]^+$  ( $\text{M} + \text{Na}^+$ ) 489.1607, found 489.1608.

**(R)-4-(6-((2,6-diisopropylphenoxy)methyl)-2-tosyl-2,6-dihydrocyclopenta[*c*]pyrrol-4-yl)-N,N-dimethylaniline (2ah)**

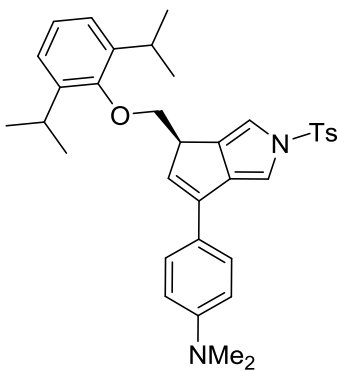

**2ah**



Compound **2ah** was prepared in 64% yield (0.1 mmol scale, 35.4 mg) according to the general procedure except using DCE as the solvent at 0 °C. Pale yellow oil.  $[\alpha]_{\text{D}}^{20} = -98.7^{\circ}$  ( $c = 1.0$ ,  $\text{CHCl}_3$ ). 78% ee (determined by HPLC: Chiralpak IC Column, 20/80 *i*-PrOH/hexane, 1.0 mL/min, 254 nm; TR = 6.19 min (minor), 8.05 min (major)).  $^1\text{H}$  NMR (400 MHz,  $\text{CDCl}_3$ )  $\delta$  7.77 (d,  $J = 8.4$  Hz, 2H), 7.54 (d,  $J = 8.8$  Hz, 2H), 7.29 – 7.25 (m, 3H), 7.14 – 7.08 (m, 4H), 6.76 (d,  $J = 8.8$  Hz, 2H), 6.48 (d,  $J = 2.4$  Hz, 1H), 4.00 (t,  $J = 7.2$  Hz, 1H), 3.79 – 3.69 (m, 2H), 3.34 – 3.26 (m, 2H), 2.99 (s, 6H), 2.38 (s, 3H), 1.20 (t,  $J = 6.8$  Hz, 12H);  $^{13}\text{C}$  NMR (100 MHz,  $\text{CDCl}_3$ )  $\delta$  153.0, 150.4, 144.6, 141.8, 138.9, 137.1, 136.5, 135.7, 129.9, 129.1, 127.3, 126.7, 124.6, 123.9, 122.4, 113.6, 112.3, 109.5, 75.5, 44.7, 40.4, 26.5, 24.1, 23.9, 21.5; IR (neat): 2974, 1707, 1612, 1547, 1312, 1212, 1185, 1074, 644, 651, 528; HRESIMS Calcd for  $[\text{C}_{35}\text{H}_{40}\text{N}_2\text{NaO}_3\text{S}]^+$  ( $\text{M} + \text{Na}^+$ ) 591.2652, found 591.2657.

**(R)-1-((6-(4-(dimethylamino)phenyl)-2-tosyl-2,4-dihydrocyclopenta[c]pyrrol-4-yl)methyl)-3,7-dimethyl-3,7-dihydro-1H-purine-2,6-dione (2ai)**

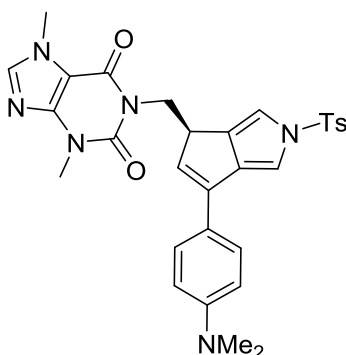

**2ai**

Compound **2ai** was prepared in 70% yield (0.1 mmol scale, 39.9 mg) according to the general procedure except at 60 °C for 4 h. Pale yellow oil.  $[\alpha]_{\text{D}}^{20} = -71.5^{\circ}$  ( $c = 1.0$ ,  $\text{CHCl}_3$ ). 76% ee (determined by HPLC: Chiralpak IC Column, 50/50 *i*-PrOH/hexane, 1.5 mL/min, 254 nm; TR = 78.28 min (major), 104.20 min (minor)).  $^1\text{H}$  NMR (400 MHz,  $\text{CDCl}_3$ )  $\delta$  7.71 (d,  $J = 8.4$  Hz, 2H), 7.53 (s, 1H), 7.48 (d,  $J = 8.8$  Hz, 2H), 7.25 (d,  $J = 8.0$  Hz, 2H), 7.15 (d,  $J = 1.6$  Hz, 1H), 6.91 (s, 1H), 6.72 (d,  $J = 8.8$  Hz, 2H), 6.32 (d,  $J = 2.4$  Hz, 1H), 4.28 – 4.14 (m, 2H), 4.04 – 3.96 (m, 4H), 3.58 (s, 3H), 2.98 (s, 6H), 2.38 (s, 3H);  $^{13}\text{C}$  NMR (100 MHz,  $\text{CDCl}_3$ )  $\delta$  155.2, 151.6, 150.3, 148.9, 144.5, 141.6, 138.0, 137.4,

136.6, 135.7, 130.9, 129.8, 127.3, 126.6, 126.4, 122.7, 113.5, 112.2, 109.3, 43.2, 42.6, 40.4, 33.6, 29.7, 21.5; IR (neat): 2934, 1704(s), 1696(s), 1611, 1530, 1363, 1222, 1132, 1025, 675, 651, 526; HRESIMS Calcd for $[C_{30}H_{30}N_6NaO_4S]^+$  ( $M + Na^+$ ) 593.1941, found 593.1948.

**(6b*S*,8a*S*,8b*R*,13a*S*,13b*S*)-12-(4-methoxyphenyl)-8a-methyl-10-tosyl-2,6b,7,8,8a,8b,10,13,13a,13b-decahydro-1*H*-phenanthro[1',2':5,6]pentaleno[1,2-c]pyrrol-4-yl acetate (2aj)**

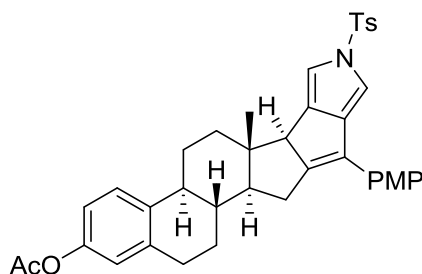

**2aj**

Compound **2aj** was prepared in 61% yield (72.2 mg) according to the general procedure except using DCE as the solvent at 40 °C. Pale yellow oil.  $[\alpha]_D^{20} = -47.8^\circ$  ( $c = 1.0$ ,  $CHCl_3$ ).  $^1H$  NMR (400 MHz,  $CDCl_3$ )  $\delta$  7.74 (d,  $J = 8.0$  Hz, 2H), 7.51 (d,  $J = 8.8$  Hz, 2H), 7.31 – 7.26 (m, 2H), 7.25 – 7.20 (m, 1H), 7.11 (s, 1H), 7.00 – 6.92 (m, 3H), 6.87 – 6.82 (m, 1H), 6.78 (s, 1H), 3.84 (s, 3H), 3.47 – 3.37 (m, 1H), 2.97 – 2.78 (m, 3H), 2.39 – 2.35 (m, 5H), 2.27 (s, 3H), 2.11 – 1.99 (m, 4H), 1.72 – 1.63 (m, 1H), 1.55 – 1.41 (m, 3H), 0.29 (s, 3H);  $^{13}C$  NMR (100 MHz,  $CDCl_3$ )  $\delta$  169.8, 158.7, 154.5, 148.5, 144.4, 142.1, 138.0, 137.8, 136.5, 132.6, 129.8, 129.4, 128.3, 127.5, 126.6, 126.2, 121.5, 118.6, 113.9, 113.1, 108.3, 62.0, 57.5, 55.3, 44.0, 41.0, 38.3, 37.6, 29.5, 28.4, 27.5, 26.2, 21.5, 21.1, 11.9; IR (neat): 2931, 2258, 2105, 1695(s), 1625, 1520, 1364, 1220, 1142, 1040, 678, 655, 521; HRESIMS Calcd for $[C_{39}H_{39}NNaO_5S]^+$  ( $M + Na^+$ ) 656.2441, found 656.2438.

**(6a*R*,6b*S*,8a*S*,8b*R*,13a*S*,13b*S*)-12-(4-methoxyphenyl)-6a,8a-dimethyl-10-tosyl-1,2,5,6,6a,6b,7,8,8a,8b,10,13,13a,13b-tetradecahydrospiro[phenanthro[1',2':5,6]pentaleno[1,2-c]pyrrole-4,2'-[1,3]dioxolane] (2ak)**

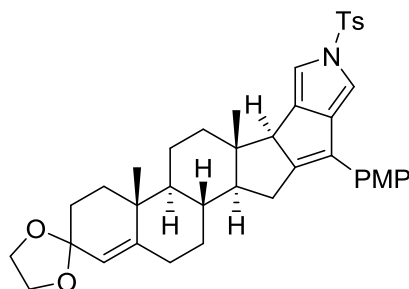

**2ak**

Compound **2ak** was prepared in 62% yield (41.0 mg, 0.1 mmol scale) according to the general procedure except using DCE as the solvent at 40 °C. Pale yellow oil.  $[\alpha]_D^{20} = -18.2$  (c = 1.0, CHCl<sub>3</sub>). <sup>1</sup>H NMR (400 MHz, CDCl<sub>3</sub>) δ 7.73 (d, *J* = 8.4 Hz, 2H), 7.49 (d, *J* = 8.8 Hz, 2H), 7.24 (d, *J* = 8.4 Hz, 2H), 7.09 (d, *J* = 1.6 Hz, 1H), 6.96 – 6.90 (m, 3H), 5.38 – 5.34 (m, 1H), 4.00 – 3.89 (m, 4H), 3.83 (s, 3H), 3.33 (s, 1H), 2.83 (dd, *J* = 17.8, 8.2 Hz, 1H), 2.57 (dd, *J* = 14.2, 2.2 Hz, 1H), 2.37 (s, 3H), 2.16 – 2.04 (m, 2H), 2.02 – 1.93 (m, 2H), 1.84 – 1.68 (m, 5H), 1.57 – 1.31 (m, 5H), 1.01 (s, 3H), 0.93 – 0.80 (m, 1H), 0.28 (s, 3H); <sup>13</sup>C NMR (100 MHz, CDCl<sub>3</sub>) δ 158.6, 155.0, 144.4, 142.2, 140.3, 136.5, 132.6, 129.8, 129.2, 128.3, 127.5, 126.6, 121.6, 113.9, 113.0, 109.4, 108.2, 64.4, 64.2, 61.9, 58.7, 55.3, 49.8, 41.8, 40.5, 37.6, 36.8, 36.2, 31.9, 31.6, 31.0, 28.7, 21.5, 20.8, 18.8, 11.8; IR (neat): 2943, 2222, 2135, 1711, 1632, 1510, 1323, 1212, 1143, 1020, 671, 635, 524; HRESIMS Calcd for[C<sub>40</sub>H<sub>45</sub>NNaO<sub>5</sub>S]<sup>+</sup> (M + Na<sup>+</sup>) 674.2911, found 674.2917.

***N,N*-dimethyl-4-((*R*)-6-(((4*S*,5'*R*,6*aR*,6*bS*,8*aS*,8*bR*,9*S*,10*R*,11*aS*,12*aS*,12*bS*)-5',6*a*,8*a*,9-tetramethyl-1,3,3',4,4',5,5',6,6*a*,6*b*,6',7,8,8*a*,8*b*,9,11*a*,12,12*a*,12*b*-icosahydrospiro[naphtho[2',1':4,5]indeno[2,1-*b*]furan-10,2'-pyran]-4-yl)oxy)methyl)-2-tosyl-2,6-dihydrocyclopenta[*c*]pyrrol-4-yl)aniline (2al)**

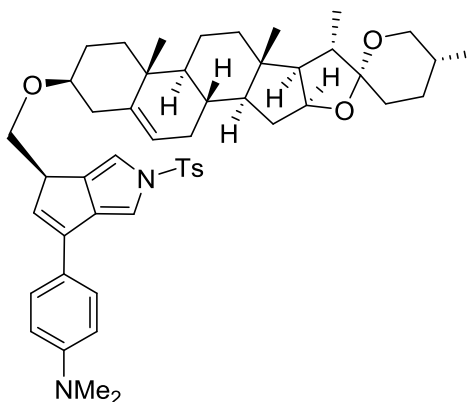

## 2al

Compound **2al** was prepared in 50% yield (40.2 mg, 0.1 mmol scale) according to the general procedure except using DCE as the solvent at 40 °C. Pale yellow oil.  $[\alpha]_D^{20} = -58.2^\circ$  ( $c = 1.0$ ,  $\text{CHCl}_3$ ).  $^1\text{H NMR}$  (400 MHz,  $\text{CDCl}_3$ )  $\delta$  7.76 (d,  $J = 8.4$  Hz, 2H), 7.51 (d,  $J = 8.8$  Hz, 2H), 7.26 – 7.24 (m, 2H), 7.20 (d,  $J = 1.6$  Hz, 1H), 7.06 (d,  $J = 1.2$  Hz, 1H), 6.75 (d,  $J = 8.8$  Hz, 2H), 6.39 (d,  $J = 2.4$  Hz, 1H), 5.34 (d,  $J = 4.8$  Hz, 1H), 4.42 (dd,  $J = 15.0, 7.4$  Hz, 1H), 3.74 – 3.54 (m, 2H), 3.53 – 3.28 (m, 3H), 3.24 – 3.12 (m, 1H), 3.00 (s, 6H), 2.43 – 2.35 (m, 4H), 2.32 – 2.18 (m, 1H), 2.07 – 1.84 (m, 5H), 1.82 – 1.68 (m, 3H), 1.65 – 1.42 (m, 9H), 1.35 – 1.26 (m, 3H), 1.22 – 1.10 (m, 2H), 1.06 (s, 3H), 1.01 – 0.95 (m, 4H), 0.94 – 0.84 (m, 2H), 0.81 (s, 3H);  $^{13}\text{C NMR}$  (100 MHz,  $\text{CDCl}_3$ )  $\delta$  150.3, 144.5, 140.9, 138.3, 137.2, 136.5, 136.4, 130.0, 129.8, 127.2, 126.7, 122.5, 121.3, 113.5, 112.2, 109.3, 80.8, 79.4, 69.8, 66.8, 62.1, 56.5, 50.1, 44.7, 41.6, 40.4, 40.2, 39.8, 39.2, 37.2, 37.0, 32.1, 31.8, 31.4(1), 31.3(6), 30.3, 28.8, 28.5, 21.5, 20.8, 19.4, 17.1, 16.3, 14.5; IR (neat): 2928, 2274, 2130, 1666, 1609, 1566, 1364, 1260, 1184, 1042, 677, 612, 561; HRESIMS Calcd for  $[\text{C}_{50}\text{H}_{64}\text{N}_2\text{NaO}_5\text{S}]^+$  ( $\text{M} + \text{Na}^+$ ) 827.4428, found 827.4438.

### (3b*R*,6a*S*,7*R*)-7-(4-methoxyphenyl)-2-tosyl-2,3,3b,4,5,6,6a,7-octahydro-1*H*-pentaleno[1,2-*c*]pyrrole (3aa)

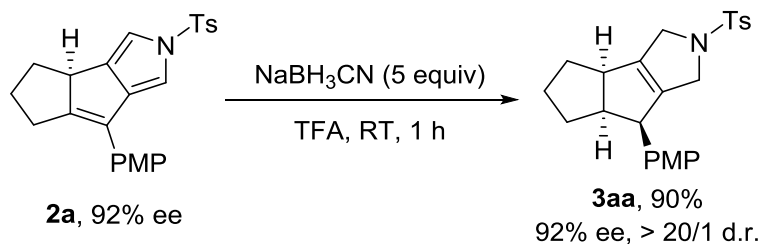

Compound **3aa** was prepared in 90% yield (73.5 mg) according to the known procedure (0.2 mmol scale).<sup>7</sup> Pale yellow oil.  $[\alpha]_D^{20} = -27.9^\circ$  ( $c = 1.0$ ,  $\text{CHCl}_3$ ). 92% ee (determined by HPLC: Chiralpak ADH Column, 15/85 *i*-PrOH/hexane, 1.0 mL/min, 254 nm; TR = 18.96 min (minor), 30.51 min (major)).  $^1\text{H NMR}$  (400 MHz,  $\text{CDCl}_3$ )  $\delta$  7.73 (d,  $J = 8.4$  Hz, 2H), 7.34 (d,  $J = 8.0$  Hz, 2H), 6.79 – 6.75 (m, 4H), 4.22 – 4.14 (m, 1H), 4.07 – 3.84 (m, 3H), 3.78 (s, 3H), 3.78 – 3.71 (m, 1H), 3.28 – 3.18 (m, 1H), 3.06 – 2.99 (m, 1H), 2.45 (s, 3H), 1.61 – 1.52 (m, 1H), 1.42 – 1.22 (m, 3H), 1.10 – 1.03 (m, 1H), 0.94 – 0.87 (m, 1H);  $^{13}\text{C NMR}$  (100 MHz,  $\text{CDCl}_3$ )  $\delta$  158.0, 144.9, 143.3, 140.8, 134.5, 131.8, 129.6, 129.4,

127.4, 113.5, 55.1, 52.5, 51.7, 51.6, 49.0, 45.9, 30.1, 29.0, 26.4, 21.5; IR (neat): 2942, 1672, 1541, 1340, 1251, 1122, 743, 676, 520; HRESIMS Calcd for  $[C_{24}H_{27}NNaO_3S]^+$  ( $M + Na^+$ ) 432.1604, found 432.1600.

***N,N*-dimethyl-4-((3*bR*,6*aS*,7*R*)-2-tosyl-2,3,3*b*,4,5,6,6*a*,7-octahydro-1*H*-pentaleno[1,2-*c*]pyrrol-7-yl)aniline (3*pa*)**

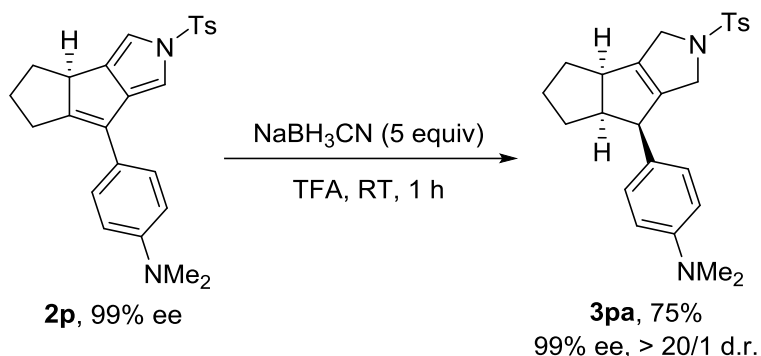

Compound **3pa** was prepared in 75% yield (63.4 mg) according to the known procedure (0.2 mmol scale)<sup>7</sup>. Pale yellow oil.  $[\alpha]_D^{20} = -39.8^\circ$  ( $c = 1.0$ , CHCl<sub>3</sub>). 99% ee (determined by HPLC: Chiralpak ASH Column, 15/85 *i*-PrOH/hexane, 1.0 mL/min, 254 nm; TR = 14.31 min (major), 21.04 min (minor)). <sup>1</sup>H NMR (400 MHz, CDCl<sub>3</sub>)  $\delta$  7.73 (d,  $J = 8.4$  Hz, 2H), 7.34 (d,  $J = 8.0$  Hz, 2H), 6.73 (d,  $J = 8.4$  Hz, 2H), 6.62 (d,  $J = 8.8$  Hz, 2H), 4.22 – 3.71 (m, 5H), 3.27 – 3.18 (m, 1H), 3.08 – 2.97 (m, 1H), 2.92 (s, 6H), 2.45 (s, 3H), 1.59 – 1.51 (m, 1H), 1.44 – 1.28 (m, 3H), 1.13 – 0.92 (m, 2H); <sup>13</sup>C NMR (100 MHz, CDCl<sub>3</sub>)  $\delta$  149.2, 144.4, 143.2, 141.3, 134.6, 129.7, 129.2, 127.7, 127.4, 112.4, 52.6, 51.8, 51.6, 49.0, 46.0, 40.6, 30.2, 29.1, 26.5, 21.5; IR (neat): 2917, 1678, 1544, 1311, 1247, 1148, 935, 744, 647, 545; HRESIMS Calcd for  $[C_{25}H_{30}N_2NaO_2S]^+$  ( $M + Na^+$ ) 445.1920, found 445.1928.

**(3*bR*,6*aS*,7*R*)-7-(4-methoxyphenyl)-2-tosyl-3*b*,4,5,6,6*a*,7-hexahydro-2*H*-pentaleno[1,2-*c*]pyrrole (3*ab*)**

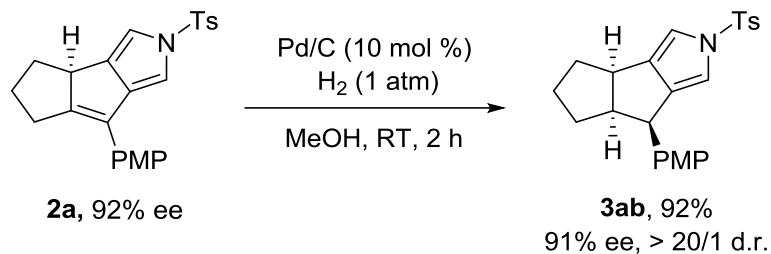

Compound **3ab** was prepared in 92% yield (37.0 mg) according to the known procedure (0.1 mmol scale)<sup>8</sup>. Pale yellow oil.  $[\alpha]_{\text{D}}^{20} = -68.1$  (c = 1.0,  $\text{CHCl}_3$ ). 91% ee (determined by HPLC: Chiralpak ASH Column, 30/70 *i*-PrOH/hexane, 1.0 mL/min, 254 nm; TR = 10.40 min (major), 15.53 min (minor)). <sup>1</sup>H NMR (400 MHz,  $\text{CDCl}_3$ )  $\delta$  7.72 (d,  $J = 8.4$  Hz, 2H), 7.27 (d,  $J = 8.0$  Hz, 2H), 7.13 (d,  $J = 8.4$  Hz, 2H), 6.86 – 6.75 (m, 4H), 4.39 (d,  $J = 8.0$  Hz, 1H), 3.79 (s, 3H), 3.43 – 3.35 (m, 1H), 3.23 – 3.12 (m, 1H), 2.40 (s, 3H), 2.01 – 1.94 (m, 1H), 1.68 – 1.63 (m, 1H), 1.48 – 1.32 (m, 2H), 1.15 – 0.94 (m, 2H); <sup>13</sup>C NMR (100 MHz,  $\text{CDCl}_3$ )  $\delta$  158.0, 144.4, 141.4, 137.2, 136.6, 133.0, 129.8, 129.1, 126.7, 113.5, 112.4, 57.0, 55.2, 45.9, 42.3, 33.1, 28.6, 26.6, 21.5; IR (neat): 2914, 1672, 1540, 1372, 1171, 1027, 810, 671, 610, 572; HRESIMS Calcd for  $[\text{C}_{24}\text{H}_{25}\text{NNaO}_3\text{S}]^+$  (M +  $\text{Na}^+$ ) 430.1447, found 430.1447.

***N,N*-dimethyl-4-((3*bR*,6*aS*,7*R*)-2-tosyl-3*b*,4,5,6,6*a*,7-hexahydro-2*H*-pentaleno[1,2-*c*]pyrrol-7-yl)aniline (3*pb*)**

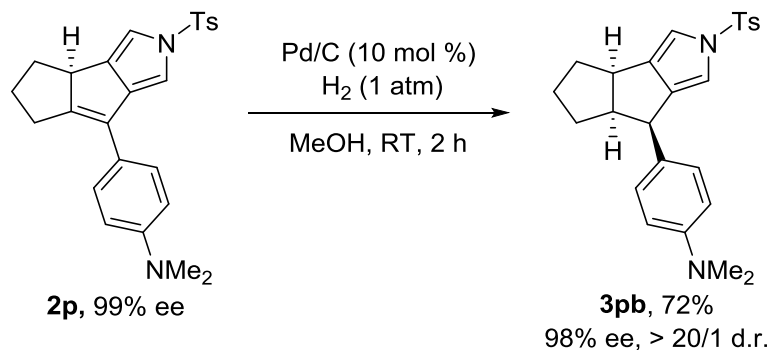

Compound **3pb** was prepared in 72% yield (30.3 mg) according to the known procedure (0.1 mmol scale)<sup>8</sup>. Pale yellow oil.  $[\alpha]_{\text{D}}^{20} = -77.5$  (c = 1.0,  $\text{CHCl}_3$ ). 98% ee (determined by HPLC: Chiralpak IC Column, 20/80 *i*-PrOH/hexane, 1.0 mL/min, 254 nm; TR = 10.24 min (major), 11.19 min (minor)). <sup>1</sup>H NMR (400 MHz,  $\text{CDCl}_3$ )  $\delta$  7.71 (d,  $J = 8.0$  Hz, 2H), 7.27 (d,  $J = 9.2$  Hz, 2H), 7.09 (d,  $J = 8.8$  Hz, 2H), 6.79 (d,  $J = 8.4$  Hz, 2H), 6.69 (d,  $J =$

8.8 Hz, 2H), 4.36 (d,  $J = 8.0$  Hz, 1H), 3.43 – 3.33 (m, 1H), 3.22 – 3.12 (m, 1H), 2.93 (s, 6H), 2.40 (s, 3H), 2.03 – 1.94 (m, 1H), 1.70 – 1.65 (m, 1H), 1.46 – 1.33 (m, 2H), 1.17 – 1.00 (m, 2H);  $^{13}\text{C}$  NMR (100 MHz,  $\text{CDCl}_3$ )  $\delta$  149.1, 144.4, 141.5, 137.7, 136.6, 129.8, 128.8, 126.7, 113.6, 112.7, 112.3, 57.1, 45.9, 42.3, 40.9, 33.2, 28.6, 26.6, 21.6; IR (neat): 2956, 1633, 1544, 1342, 1174, 1020, 971, 847, 641, 571; HRESIMS Calcd for  $[\text{C}_{25}\text{H}_{28}\text{N}_2\text{NaO}_2\text{S}]^+$  ( $\text{M} + \text{Na}^+$ ) 443.1764, found 443.1768.

**(3aR,3bR,6aS,7S,7aS)-7-(4-methoxyphenyl)-2-tosyldecahydro-1H-pentaleno[1,2-c]pyrrole (3ac)**

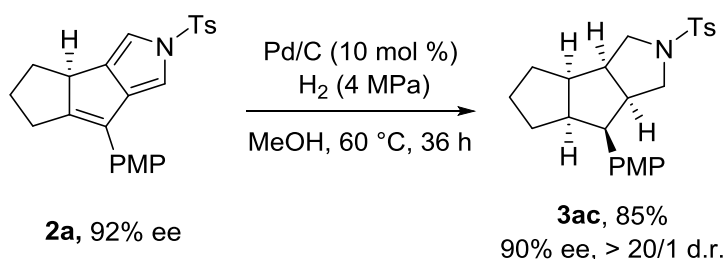

Compound **3ac** was prepared in 85% yield (35.0 mg) according to the known procedure (0.1 mmol scale)<sup>8</sup>. Pale yellow oil.  $[\alpha]_{\text{D}}^{20} = -27.1$  °( $c = 1.0$ ,  $\text{CHCl}_3$ ). 90% ee (determined by HPLC: Chiralpak ADH Column, 15/85 *i*-PrOH/hexane, 1.0 mL/min, 254 nm; TR = 14.04 min (minor), 16.38 min (major)).  $^1\text{H}$  NMR (400 MHz,  $\text{CDCl}_3$ )  $\delta$  7.70 (d,  $J = 8.0$  Hz, 2H), 7.31 (d,  $J = 7.6$  Hz, 2H), 7.14 – 7.08 (m, 2H), 6.87 – 6.81 (m, 2H), 3.80 (s, 3H), 3.51 – 3.46 (m, 1H), 3.45 – 3.37 (m, 2H), 3.26 – 3.11 (m, 2H), 3.09 – 2.87 (m, 2H), 2.84 – 2.66 (m, 2H), 2.43 (s, 3H), 1.78 – 1.67 (m, 1H), 1.67 – 1.61 (m, 1H), 1.57 – 1.52 (m, 1H), 1.38 – 1.28 (m, 2H), 1.19 – 1.04 (m, 1H);  $^{13}\text{C}$  NMR (100 MHz,  $\text{CDCl}_3$ )  $\delta$  157.6, 143.3, 133.6, 133.3, 129.5, 129.3, 127.6, 113.6, 55.2, 49.9, 49.8, 49.7, 48.5, 47.3, 45.7, 45.0, 30.8, 28.1, 27.8, 21.5; IR (neat): 2925, 1610, 1540, 1341, 1104, 1031, 875, 695, 646, 520; HRESIMS Calcd for  $[\text{C}_{24}\text{H}_{29}\text{NNaO}_3\text{S}]^+$  ( $\text{M} + \text{Na}^+$ ) 434.1760, found 434.1755.

***N,N*-dimethyl-4-((3aR,3bR,6aS,7S,7aS)-2-tosyldecahydro-1H-pentaleno[1,2-c]pyrrol-7-yl)aniline (3pc)**

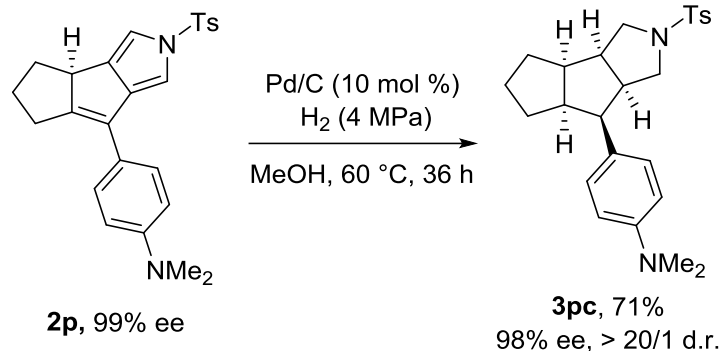

Compound **3pc** was prepared in 71% yield (30.1 mg) according to the known procedure (0.1 mmol scale)<sup>8</sup>. Pale yellow oil.  $[\alpha]_{\text{D}}^{20} = -78.9^\circ$  ( $c = 1.0$ ,  $\text{CHCl}_3$ ). 98% ee (determined by HPLC: Chiralpak IC Column, 30/70 *i*-PrOH/hexane, 1.0 mL/min, 254 nm; TR = 25.28 min (major), 34.27 min (minor)).  $^1\text{H NMR}$  (400 MHz,  $\text{CDCl}_3$ )  $\delta$  7.69 (d,  $J = 8.0$  Hz, 2H), 7.30 (d,  $J = 8.0$  Hz, 2H), 7.07 (d,  $J = 8.4$  Hz, 2H), 6.68 (d,  $J = 8.8$  Hz, 2H), 3.49 – 3.35 (m, 3H), 3.26 – 3.13 (m, 2H), 3.05 – 2.96 (m, 1H), 2.92 (s, 6H), 2.91 – 2.84 (m, 1H), 2.80 – 2.60 (m, 2H), 2.42 (s, 3H), 1.78 – 1.50 (m, 4H), 1.37 – 1.27 (m, 1H), 1.21 – 1.08 (m, 1H);  $^{13}\text{C NMR}$  (100 MHz,  $\text{CDCl}_3$ )  $\delta$  148.7, 143.2, 133.6, 129.5, 129.1, 129.0, 127.5, 112.6, 49.9, 49.8, 49.7, 48.6, 47.1, 45.6, 44.9, 40.7, 30.9, 28.1, 27.8, 21.5; IR (neat): 2926, 2874, 1634, 1522, 1345, 1114, 1067, 978, 823, 696, 522; HRESIMS Calcd for  $[\text{C}_{25}\text{H}_{32}\text{N}_2\text{NaO}_2\text{S}]^+$  ( $\text{M} + \text{Na}^+$ ) 447.2077, found 447.2078.

**(*R*)-7-([1,1'-biphenyl]-4-yl)-2-tosyl-3b,4,5,6-tetrahydro-2*H*-pentaleno[1,2-*c*]pyrrole (3pd)**

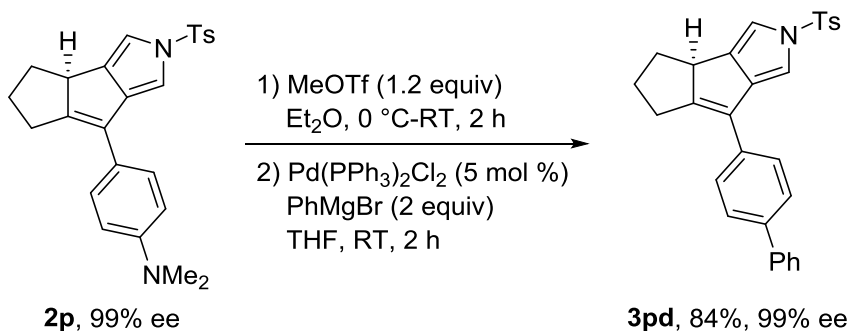

Compound **3pd** was prepared in 84% yield (37.9 mg) according to the known procedure (0.1 mmol scale)<sup>9</sup>. Pale yellow oil.  $[\alpha]_{\text{D}}^{20} = -102.4^\circ$  ( $c = 1.0$ ,  $\text{CHCl}_3$ ). 99% ee (determined by HPLC: Chiralpak IC Column, 20/80 *i*-PrOH/hexane, 1.0 mL/min, 254 nm; TR = 14.61 min (minor), 15.83 min (major)).  $^1\text{H NMR}$  (400 MHz,  $\text{CDCl}_3$ )  $\delta$  7.77 (d,  $J = 8.4$  Hz, 2H),



7.67 – 7.56 (m, 6H), 7.49 – 7.42 (m, 2H), 7.38 – 7.34 (m, 1H), 7.26 (d,  $J = 9.2$  Hz, 2H), 7.15 – 6.98 (m, 2H), 3.66 – 3.58 (m, 1H), 2.82 – 2.72 (m, 1H), 2.55 – 2.43 (m, 1H), 2.37 (s, 3H), 2.29 – 2.06 (m, 3H), 1.14 – 1.01 (m, 1H);  $^{13}\text{C}$  NMR (100 MHz,  $\text{CDCl}_3$ )  $\delta$  160.1, 144.5, 141.2, 140.7, 139.8, 136.5, 134.8, 133.7, 129.8, 128.8, 127.7, 127.6, 127.3, 127.1, 127.0, 126.7, 113.3, 108.0, 49.9, 29.6, 27.8, 25.2, 21.5; IR (neat): 2934, 1704, 1623, 1525, 1375, 1189, 1013, 934, 835, 676, 511; HRESIMS Calcd for  $[\text{C}_{29}\text{H}_{25}\text{NNaO}_2\text{S}]^+$  ( $\text{M} + \text{Na}^+$ ) 474.1498, found 474.1490.

**4-((3bR,6aS,7R)-2-tosyl-3b,4,5,6,6a,7-hexahydro-2H-pentaleno[1,2-c]pyrrol-7-yl)aniline (3qa)**

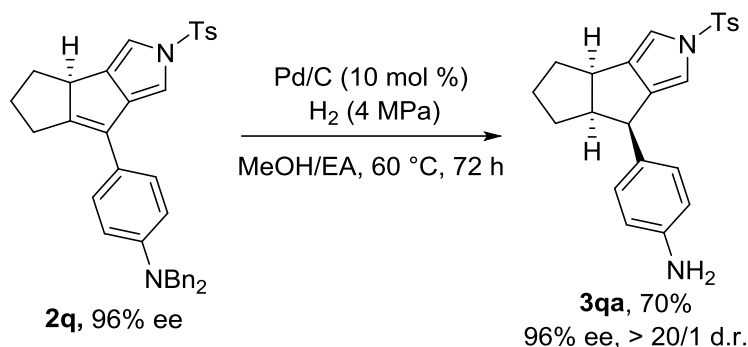

Compound **3qa** was prepared in 70% yield (27.4 mg) according to the known procedure (0.1 mmol scale)<sup>8,10</sup>. Pale yellow oil.  $[\alpha]_{\text{D}}^{20} = -48.2^\circ$  ( $c = 1.0$ ,  $\text{CHCl}_3$ ). 96% ee (determined by HPLC: Chiralpak ASH Column, 50/50 *i*-PrOH/hexane, 1.0 mL/min, 254 nm; TR = 13.87 min (major), 29.47 min (minor)).  $^1\text{H}$  NMR (400 MHz,  $\text{CDCl}_3$ )  $\delta$  7.72 (d,  $J = 8.0$  Hz, 2H), 7.27 (d,  $J = 8.4$  Hz, 2H), 7.00 (d,  $J = 8.4$  Hz, 2H), 6.79 (d,  $J = 10.8$  Hz, 2H), 6.62 (d,  $J = 8.0$  Hz, 2H), 4.34 (d,  $J = 7.6$  Hz, 1H), 3.42 – 3.33 (m, 1H), 3.21 – 3.09 (m, 1H), 2.40 (s, 3H), 2.02 – 1.94 (m, 1H), 1.65 – 1.60 (m, 1H), 1.46 – 1.35 (m, 2H), 1.11 – 0.98 (m, 2H);  $^{13}\text{C}$  NMR (100 MHz,  $\text{CDCl}_3$ )  $\delta$  144.4, 141.5, 137.5, 136.6, 131.0, 129.8, 129.0, 126.7, 115.0, 113.5, 112.3, 57.0, 46.0, 42.3, 33.2, 28.6, 26.6, 21.6; IR (neat): 3474 (br), 2913, 1635, 1556, 1487, 1367, 1214, 1055, 931, 887, 642, 574; HRESIMS Calcd for  $[\text{C}_{23}\text{H}_{24}\text{N}_2\text{NaO}_2\text{S}]^+$  ( $\text{M} + \text{Na}^+$ ) 415.1451, found 415.1457.

**4-((3aR,3bR,6aS,7S,7aS)-2-tosyldecahydro-1H-pentaleno[1,2-c]pyrrol-7-yl)aniline (3qb)**

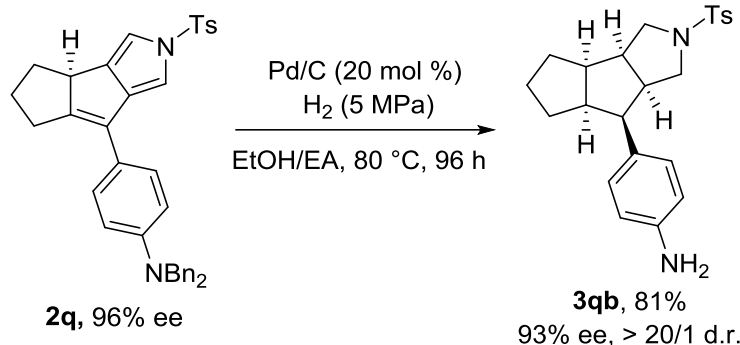

Compound **3qb** was prepared in 81% yield (32.0 mg) according to the known procedure (0.1 mmol scale)<sup>8,10</sup>. Pale yellow oil.  $[\alpha]_{\text{D}}^{20} = -79.2^\circ$  ( $c = 1.0$ ,  $\text{CHCl}_3$ ). 93% ee (determined by HPLC: Chiralpak IC Column, 50/50 *i*-PrOH/hexane, 1.0 mL/min, 254 nm; TR = 32.45 min (major), 44.83 min (minor)).  $^1\text{H NMR}$  (400 MHz,  $\text{CDCl}_3$ )  $\delta$  7.69 (d,  $J = 8.0$  Hz, 2H), 7.31 (d,  $J = 8.0$  Hz, 2H), 6.98 (d,  $J = 8.0$  Hz, 2H), 6.63 (d,  $J = 8.4$  Hz, 2H), 3.60 (s, 2H), 3.49 – 3.34 (m, 3H), 3.23 – 3.06 (m, 2H), 3.06 – 2.83 (m, 2H), 2.79 – 2.63 (m, 2H), 2.42 (s, 3H), 1.75 – 1.65 (m, 3H), 1.41 – 1.30 (m, 2H), 1.17 – 1.06 (m, 1H);  $^{13}\text{C NMR}$  (100 MHz,  $\text{CDCl}_3$ )  $\delta$  143.3, 133.7, 131.2, 129.5, 129.2, 127.5, 115.1, 49.9, 49.8, 49.7, 48.5, 47.3, 45.6, 45.0, 30.8, 28.1, 27.8, 21.5; IR (neat): 3470 (br), 2934, 1634, 1551, 1486, 1345, 1274, 1051, 928, 874, 633, 577; HRESIMS Calcd for  $[\text{C}_{23}\text{H}_{28}\text{N}_2\text{NaO}_2\text{S}]^+$  (M +  $\text{Na}^+$ ) 419.1764, found 419.1763.

**[D<sub>3</sub>]-2a (91% D)**

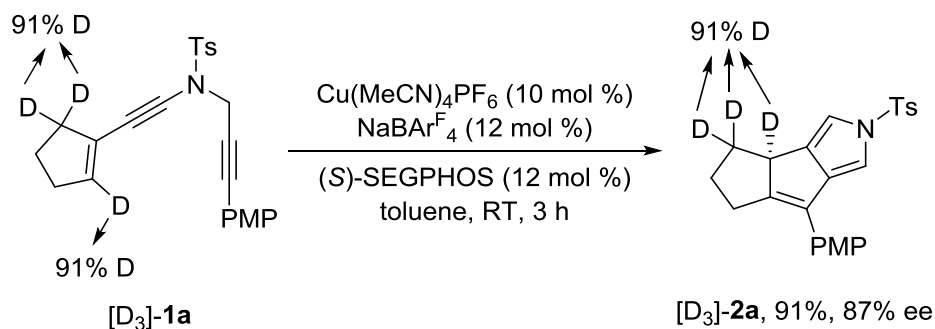

$[\alpha]_{\text{D}}^{20} = -69.0^\circ$  ( $c = 1.0$ ,  $\text{CHCl}_3$ ). 87% ee (determined by HPLC: Chiralpak ASH Column, 15/85 *i*-PrOH/hexane, 1.0 mL/min, 254 nm; TR = 15.33 min (major), 23.72 min (minor)).  $^1\text{H NMR}$  (400 MHz,  $\text{CDCl}_3$ )  $\delta$  7.75 (d,  $J = 8.4$  Hz, 2H), 7.45 (d,  $J = 8.8$  Hz, 2H), 7.28 – 7.22 (m, 2H), 7.08 – 7.03 (m, 1H), 6.98 – 6.93 (m, 3H), 3.83 (s, 3H), 3.57 – 3.53 (m, 0.09H), 2.77 – 2.64 (m, 1H), 2.46 – 2.40 (m, 1H), 2.37 (s, 3H), 2.23 – 2.13 (m, 2H), 2.06

– 2.04 (m, 0.09H), 1.05 – 1.00 (m, 0.09H);  $^{13}\text{C}$  NMR (100 MHz,  $\text{CDCl}_3$ )  $\delta$  158.7, 157.8, 144.4, 141.5, 136.5, 134.9, 129.8, 128.4, 127.4, 126.7, 113.9, 113.2, 107.8, 55.3, 29.4, 25.0, 21.5.

[D]-2a (29% D)

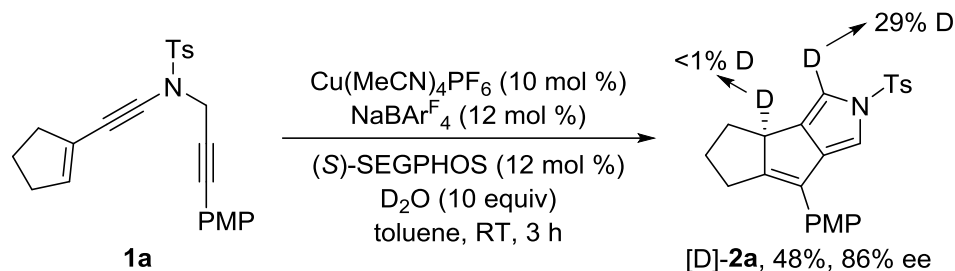

$[\alpha]_{\text{D}}^{20} = -67.5^\circ$  ( $c = 1.0$ ,  $\text{CHCl}_3$ ). 86% ee (determined by HPLC: Chiralpak ASH Column, 15/85 *i*-PrOH/hexane, 1.0 mL/min, 254 nm; TR = 15.76 min (major), 24.66 min (minor)).  $^1\text{H}$  NMR (400 MHz,  $\text{CDCl}_3$ )  $\delta$  7.77 – 7.72 (m, 2H), 7.48 – 7.42 (m, 2H), 7.26 – 7.23 (m, 2H), 7.06 – 7.02 (m, 1H), 6.99 – 6.96 (m, 0.71H), 6.96 – 6.92 (m, 2H), 3.84 (s, 3H), 3.61 – 3.53 (m, 1H), 2.76 – 2.66 (m, 1H), 2.46 – 2.39 (m, 1H), 2.37 (s, 3H), 2.25 – 2.04 (m, 3H), 1.09 – 1.01 (m, 1H).

[D]-2a (46% D)

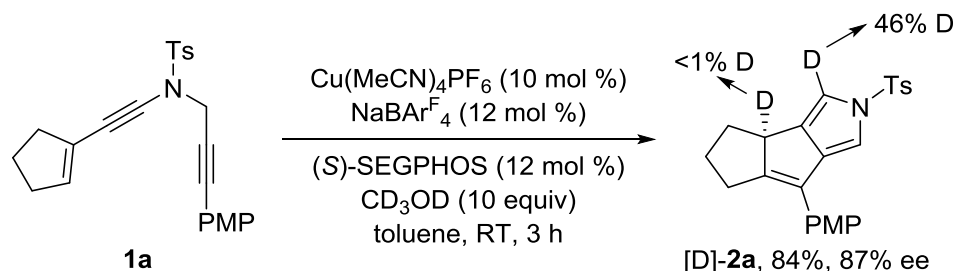

$[\alpha]_{\text{D}}^{20} = -69.5^\circ$  ( $c = 1.0$ ,  $\text{CHCl}_3$ ). 87% ee (determined by HPLC: Chiralpak ASH Column, 15/85 *i*-PrOH/hexane, 1.0 mL/min, 254 nm; TR = 15.73 min (major), 24.54 min (minor)).  $^1\text{H}$  NMR (400 MHz,  $\text{CDCl}_3$ )  $\delta$  7.75 (d,  $J = 8.4$  Hz, 2H), 7.45 (d,  $J = 8.8$  Hz, 2H), 7.25 (d,  $J = 6.0$  Hz, 2H), 7.06 – 7.03 (m, 1H), 6.98 – 6.92 (m, 2.54H), 3.84 (s, 3H), 3.60 – 3.52 (m, 1H), 2.76 – 2.66 (m, 1H), 2.46 – 2.39 (m, 1H), 2.37 (s, 3H), 2.25 – 2.03 (m, 3H), 1.11 – 0.97 (m, 1H).

[D<sub>2</sub>]-**2a** (30% D)

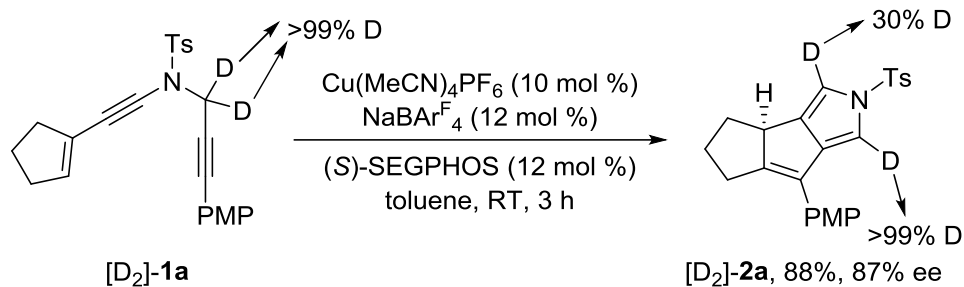

$[\alpha]_{\text{D}}^{20} = -70.2^\circ (c = 1.0, \text{CHCl}_3)$ . 87% ee (determined by HPLC: Chiralpak ASH Column, 15/85 *i*-PrOH/hexane, 1.0 mL/min, 254 nm; TR = 15.73 min (major), 24.53 min (minor)).  
<sup>1</sup>H NMR (500 MHz, CDCl<sub>3</sub>)  $\delta$  7.75 (d,  $J = 8.5$  Hz, 2H), 7.48 – 7.42 (m, 2H), 7.25 (d,  $J = 7.0$  Hz, 2H), 6.97 (d,  $J = 1.5$  Hz, 0.7H), 6.96 – 6.91 (m, 2H), 3.83 (s, 3H), 3.60 – 3.52 (m, 1H), 2.75 – 2.65 (m, 1H), 2.45 – 2.38 (m, 1H), 2.36 (s, 3H), 2.25 – 2.14 (m, 2H), 2.12 – 2.05 (m, 1H), 1.09 – 0.98 (m, 1H).

[D<sub>2</sub>]-**2a** (6% D)

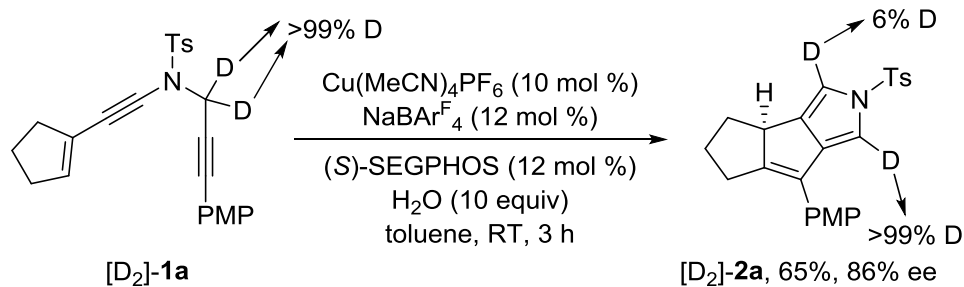

$[\alpha]_{\text{D}}^{20} = -68.2^\circ (c = 1.0, \text{CHCl}_3)$ . 86% ee (determined by HPLC: Chiralpak ASH Column, 15/85 *i*-PrOH/hexane, 1.0 mL/min, 254 nm; TR = 15.15 min (major), 23.39 min (minor)).  
<sup>1</sup>H NMR (500 MHz, CDCl<sub>3</sub>)  $\delta$  7.75 (d,  $J = 8.5$  Hz, 2H), 7.45 (d,  $J = 8.5$  Hz, 2H), 7.25 (d,  $J = 6.0$  Hz, 2H), 6.97 (d,  $J = 1.5$  Hz, 0.94H), 6.96 – 6.91 (m, 2H), 3.84 (s, 3H), 3.61 – 3.54 (m, 1H), 2.76 – 2.66 (m, 1H), 2.46 – 2.40 (m, 1H), 2.38 (s, 3H), 2.27 – 2.16 (m, 2H), 2.13 – 2.05 (m, 1H), 1.09 – 0.99 (m, 1H).

**2u'** (4-(cyclopent-1-en-1-yl)-1-tosyl-1*H*-pyrrol-3-yl)(phenyl)methanone

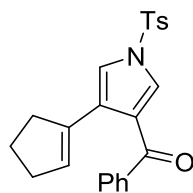

**2u'**

$^1\text{H}$  NMR (400 MHz,  $\text{CDCl}_3$ )  $\delta$  7.87 – 7.81 (m, 4H), 7.62 – 7.56 (m, 1H), 7.50 – 7.44 (m, 2H), 7.40 (d,  $J = 2.4$  Hz, 1H), 7.33 (d,  $J = 8.0$  Hz, 2H), 7.13 (d,  $J = 2.4$  Hz, 1H), 6.09 – 6.06 (m, 1H), 2.59 – 2.51 (m, 2H), 2.46 – 2.36 (m, 5H), 1.96 – 1.84 (m, 2H);  $^{13}\text{C}$  NMR (100 MHz,  $\text{CDCl}_3$ )  $\delta$  191.4, 145.8, 138.5, 135.0, 133.4, 132.8, 130.2, 129.9, 129.6, 128.3, 127.1, 126.7, 126.1, 125.9, 118.8, 34.8, 33.4, 22.9, 21.6; IR (neat): 2914, 1701(s), 1654, 1523, 1422, 1317, 1227, 1051, 971, 877; HRESIMS Calcd for  $[\text{C}_{23}\text{H}_{21}\text{NNaO}_3\text{S}]^+$  ( $\text{M} + \text{Na}^+$ ) 414.1134, found 414.1137.

**2a**/ $[\text{D}_3]$ -**2a** (41% D)

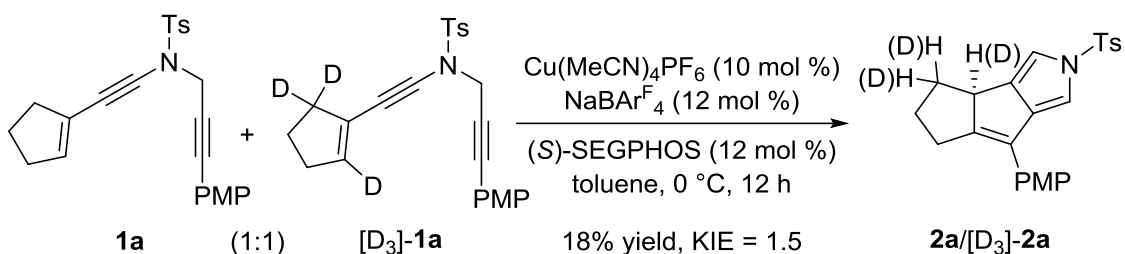

$^1\text{H}$  NMR (500 MHz,  $\text{CDCl}_3$ )  $\delta$  7.75 (d,  $J = 8.5$  Hz, 2H), 7.47 – 7.41 (m, 2H), 7.25 (d,  $J = 6.0$  Hz, 2H), 7.08 – 6.91 (m, 4H), 3.84 (s, 3H), 3.60 – 3.53 (m, 0.59H), 2.76 – 2.67 (m, 1H), 2.47 – 2.40 (m, 1H), 2.38 (s, 3H), 2.25 – 2.16 (m, 2H), 2.11 – 2.08 (m, 0.59H), 1.10 – 1.00 (m, 0.59H).

**2a**/ $[\text{D}_3]$ -**2a** (40% D)

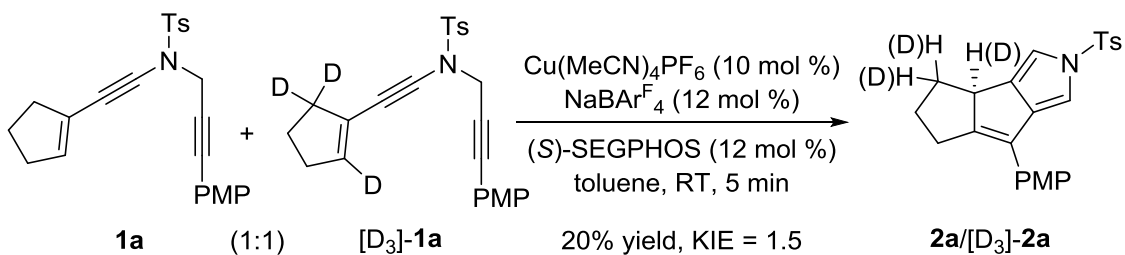

$^1\text{H}$  NMR (500 MHz,  $\text{CDCl}_3$ )  $\delta$  7.75 (d,  $J = 8.5$  Hz, 2H), 7.48 – 7.42 (m, 2H), 7.25 (d,  $J = 6.0$  Hz, 2H), 7.08 – 6.91 (m, 4H), 3.84 (s, 3H), 3.61 – 3.53 (m, 0.6H), 2.75 – 2.66 (m, 1H), 2.46 – 2.39 (m, 1H), 2.38 (s, 3H), 2.25 – 2.15 (m, 2H), 2.11 – 2.05 (m, 0.6H), 1.08 – 1.00 (m, 0.6H).

Crystal data and structure refinement for **2s**. CCDC Number = 2046032.

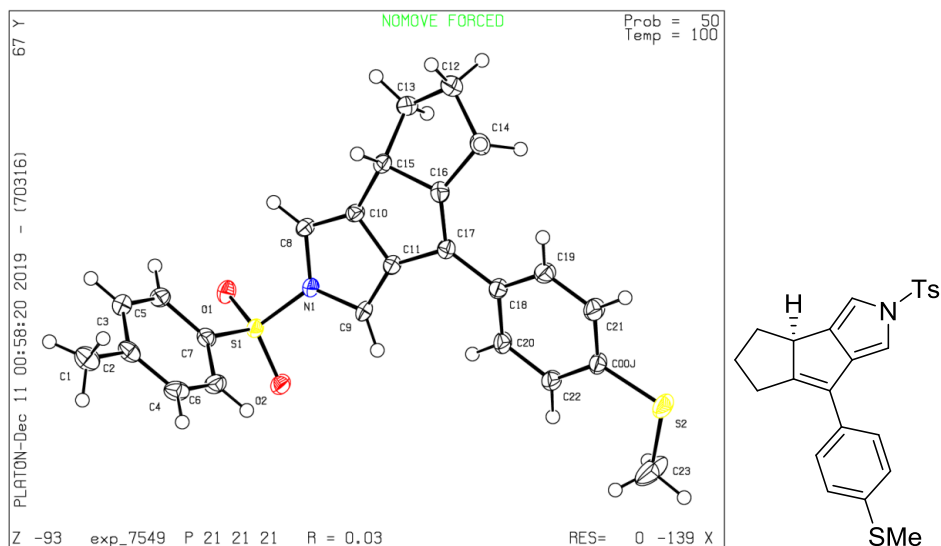

Bond precision: C-C = 0.0034 Å

Wavelength=1.54184

Cell: a=5.24790 (4) b=18.15502 (12) c=21.35505 (16)

alpha=90 beta=90 gamma=90

Temperature: 100 K

|                        | Calculated      | Reported        |
|------------------------|-----------------|-----------------|
| Volume                 | 2034.62 (3)     | 2034.62 (3)     |
| Space group            | P 21 21 21      | P 21 21 21      |
| Hall group             | P 2ac 2ab       | P 2ac 2ab       |
| Moiety formula         | C24 H23 N O2 S2 | C24 H23 N O2 S2 |
| Sum formula            | C24 H23 N O2 S2 | C24 H23 N O2 S2 |
| Mr                     | 421.55          | 421.55          |
| Dx, g cm <sup>-3</sup> | 1.376           | 1.376           |
| Z                      | 4               | 4               |
| Mu (mm <sup>-1</sup> ) | 2.535           | 2.535           |
| F000                   | 888.0           | 888.0           |
| F000'                  | 892.83          |                 |
| h, k, lmax             | 6, 22, 26       | 6, 21, 25       |
| Nref                   | 3905 [ 2290]    | 3781            |
| Tmin, Tmax             | 0.859, 0.881    | 0.534, 1.000    |
| Tmin'                  | 0.776           |                 |

Correction method= # Reported T Limits: Tmin=0.534 Tmax=1.000  
AbsCorr = MULTI-SCAN

Data completeness= 1.65/0.97 Theta (max)= 70.570

R(reflections)= 0.0281( 3719) wR2(reflections)= 0.0745( 3781)

S = 1.040

Npar= 264

Crystal data and structure refinement for **3pc**. CCDC Number = 2046033.

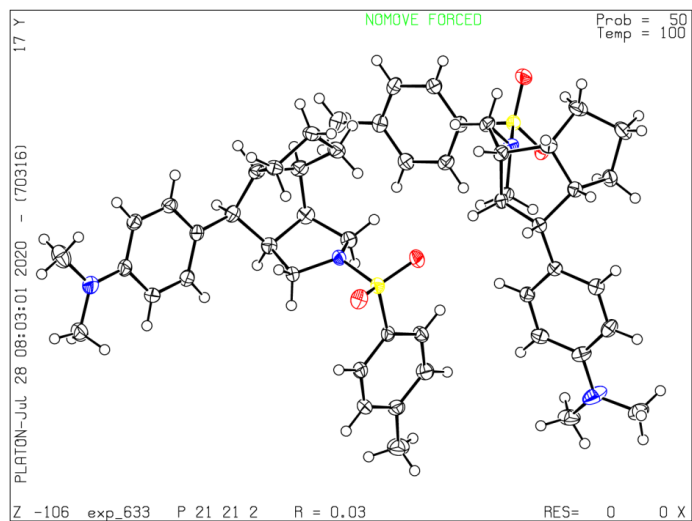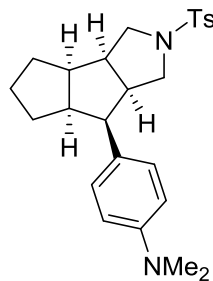

Bond precision: C-C = 0.0030 Å

Wavelength=1.54184

Cell: a=24.65475 (12)

b=20.81653 (9)

c=8.55464 (4)

alpha=90

beta=90

gamma=90

Temperature: 100 K

|                        | Calculated                                                      | Reported                                                                     |
|------------------------|-----------------------------------------------------------------|------------------------------------------------------------------------------|
| Volume                 | 4390.47 (4)                                                     | 4390.47 (4)                                                                  |
| Space group            | P 21 21 2                                                       | P 21 21 2                                                                    |
| Hall group             | P 2 2ab                                                         | P 2 2ab                                                                      |
| Moiety formula         | C <sub>25</sub> H <sub>32</sub> N <sub>2</sub> O <sub>2</sub> S | 2 (C <sub>25</sub> H <sub>32</sub> N <sub>2</sub> O <sub>2</sub> S)          |
| Sum formula            | C <sub>25</sub> H <sub>32</sub> N <sub>2</sub> O <sub>2</sub> S | C <sub>50</sub> H <sub>65</sub> N <sub>4</sub> O <sub>4</sub> S <sub>2</sub> |
| Mr                     | 424.59                                                          | 850.18                                                                       |
| Dx, g cm <sup>-3</sup> | 1.285                                                           | 1.286                                                                        |
| Z                      | 8                                                               | 4                                                                            |
| Mu (mm <sup>-1</sup> ) | 1.493                                                           | 1.493                                                                        |
| F000                   | 1824.0                                                          | 1828.0                                                                       |
| F000'                  | 1831.31                                                         |                                                                              |
| h, k, lmax             | 29, 25, 10                                                      | 29, 25, 10                                                                   |
| Nref                   | 8257 [ 4638]                                                    | 7983                                                                         |
| Tmin, Tmax             | 0.861, 0.928                                                    | 0.477, 1.000                                                                 |
| Tmin'                  | 0.861                                                           |                                                                              |

Correction method= # Reported T Limits: Tmin=0.477 Tmax=1.000

AbsCorr = MULTI-SCAN

Data completeness= 1.72/0.97

Theta(max)= 69.478

R(reflections)= 0.0270 ( 7804)

wR2(reflections)= 0.0707 ( 7983)

S = 0.983

Npar= 547



## Computational Methods.

All calculations were performed using Gaussian 09 package.<sup>11</sup> Geometry optimizations and vibration frequencies were calculated by using M06<sup>12</sup> level of density function theory with the LANL2DZ basis set<sup>13-14</sup> and pseudopotential for the Cu atom, and the 6-31G(d,p)<sup>15-16</sup> for C, H, O, N, P and S atom. All local minimums were confirmed with no imaginary frequency and all transition states had only one imaginary frequency. And every transition state was checked by intrinsic reaction coordinate (IRC). Single-point energies of the transition states [CuL8]-R TS<sub>B</sub> and [CuL8]-S TS<sub>B</sub> that are related to enantioselectivity were further computed at the M06-D3/def2TZVP<sup>17</sup> level of theory. The SMD<sup>18</sup> solvation model with toluene or DCE was used for all calculations. The ball stick models of molecules were drawn by CYLview 2.0.<sup>19</sup>

## S1. Effects of ligand coordination number on the achiral Cu(I) catalysis

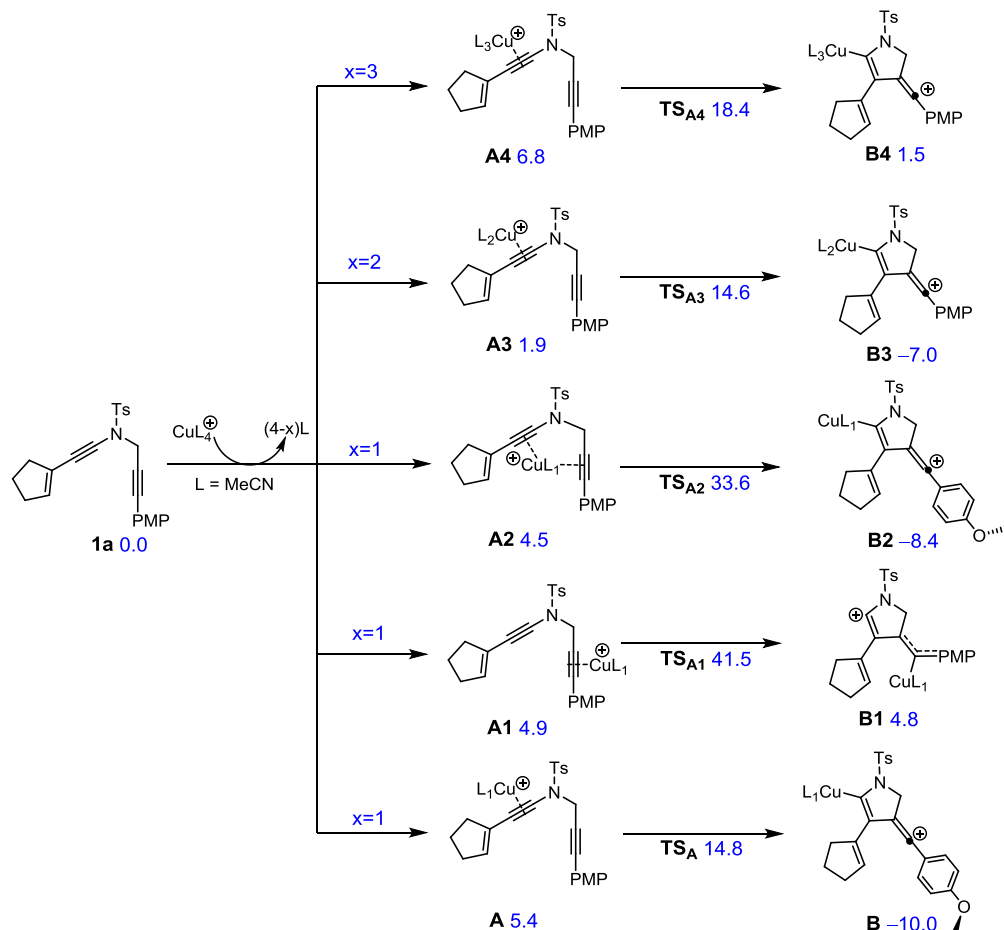

Supplementary Figure 6. Relative free energies (ΔG, in kcal/mol) of the Cu(I)-bound

precursors with different number of L ligands (L= MeCN), the transition states and intermediates of the first cyclization step induced by Cu(I) coordination from SMD(toluene)-M06/6-31G(d,p)&LANL2DZ computations.

The pristine Cu(I) species is  $[\text{Cu}(\text{L})_4]^+$  containing the achiral ligand  $\text{L}=\text{CH}_3\text{CN}$ . Upon coordination of Cu(I) to the ynamide or N-propargyl group (**Supplementary Figure 6**), the most stable Cu(I)-binding precursor is **A3** with the Cu(I) species being preferentially attached to the electron-rich ynamide  $\text{C}\equiv\text{C}$  bond, following which the subsequent cyclization has the lowest activation barrier (14.6 kcal/mol with respect to **1a**) with formation of the vinyl-cation intermediate **B3**. In such intramolecular cyclization step **A3**  $\rightarrow$  **B3** the Cu(I) center has two L ligands attached. In case that only one L ligand is attached onto the Cu(I) center, such intramolecular cyclization, i.e., **A**  $\rightarrow$  **B**, gives similar value of activation barrier (14.8 kcal/mol with respect **1a**), and the formed vinyl-cation **B** is even by 3.0 kcal/mol lower than **B3** in free energy. Accordingly, it is reasonable to assume that the catalytic Cu(I) species has one L ligand attached in the subsequent steps involving Cu(I)-C bonding.

Furthermore, it is noteworthy that the intramolecular cyclization, **A1**  $\rightarrow$  **B1**, initiated by Cu(I)-activated  $\text{C}\equiv\text{C}$  bond of the *N*-propargyl suffers a high activation barrier (41.5 kcal/mol with respect to **1a**) and the formed vinyl-cation intermediate **B1** is quite higher in free energy than **B**.

## S2. single-copper catalysis vs. dual-copper catalysis

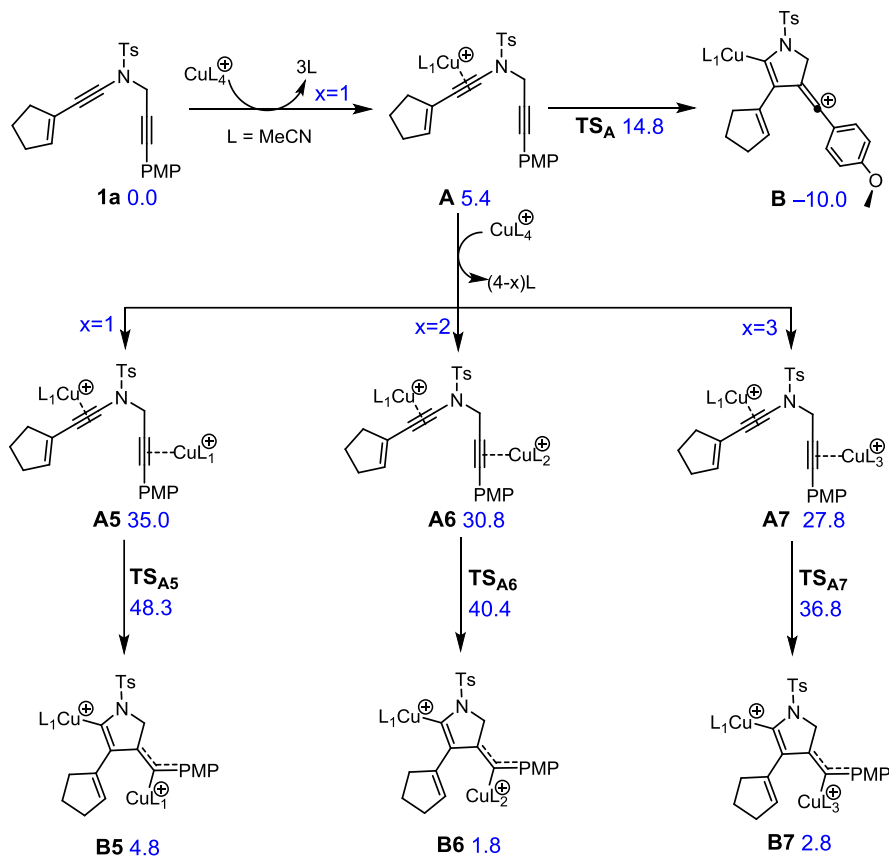

**Supplementary Figure 7.** Initiation of intramolecular cyclization in single-copper catalysis and dual-copper catalysis. Relative free energies ( $\Delta G$ , in kcal/mol) were computed at the SMD(toluene)-M06/6-31G(d,p)&LANL2DZ level of theory.

As the substrate has two  $\text{C}\equiv\text{C}$  bonds both capable of forming dative bond with Cu(I) species, the possibility of dual-copper catalysis should be considered and compared with single-copper catalysis. However, our DFT computations (**Supplementary Figure 7**) disclosed that that dual-copper catalysis is unlikely to occur. First, formation of the precursors (**A5-A7**) for dual-copper catalysis are predicted to be highly unfavorable in free energy change. Second, the transition states ( $\text{TS}_{A5}$ - $\text{TS}_{A7}$ ) of intramolecular cyclization in the dual-copper catalysis are by at least 36.8 kcal/mole higher than the isolated reactants in free energy. Third, the as-formed intermediates **B5-B7** are by at least 11.8 kcal/mol higher in free energy than the vinyl-cation intermediate **B** in single-copper catalysis.

### S3. Possible mechanisms for [1,4]-H shift within the intermediate D

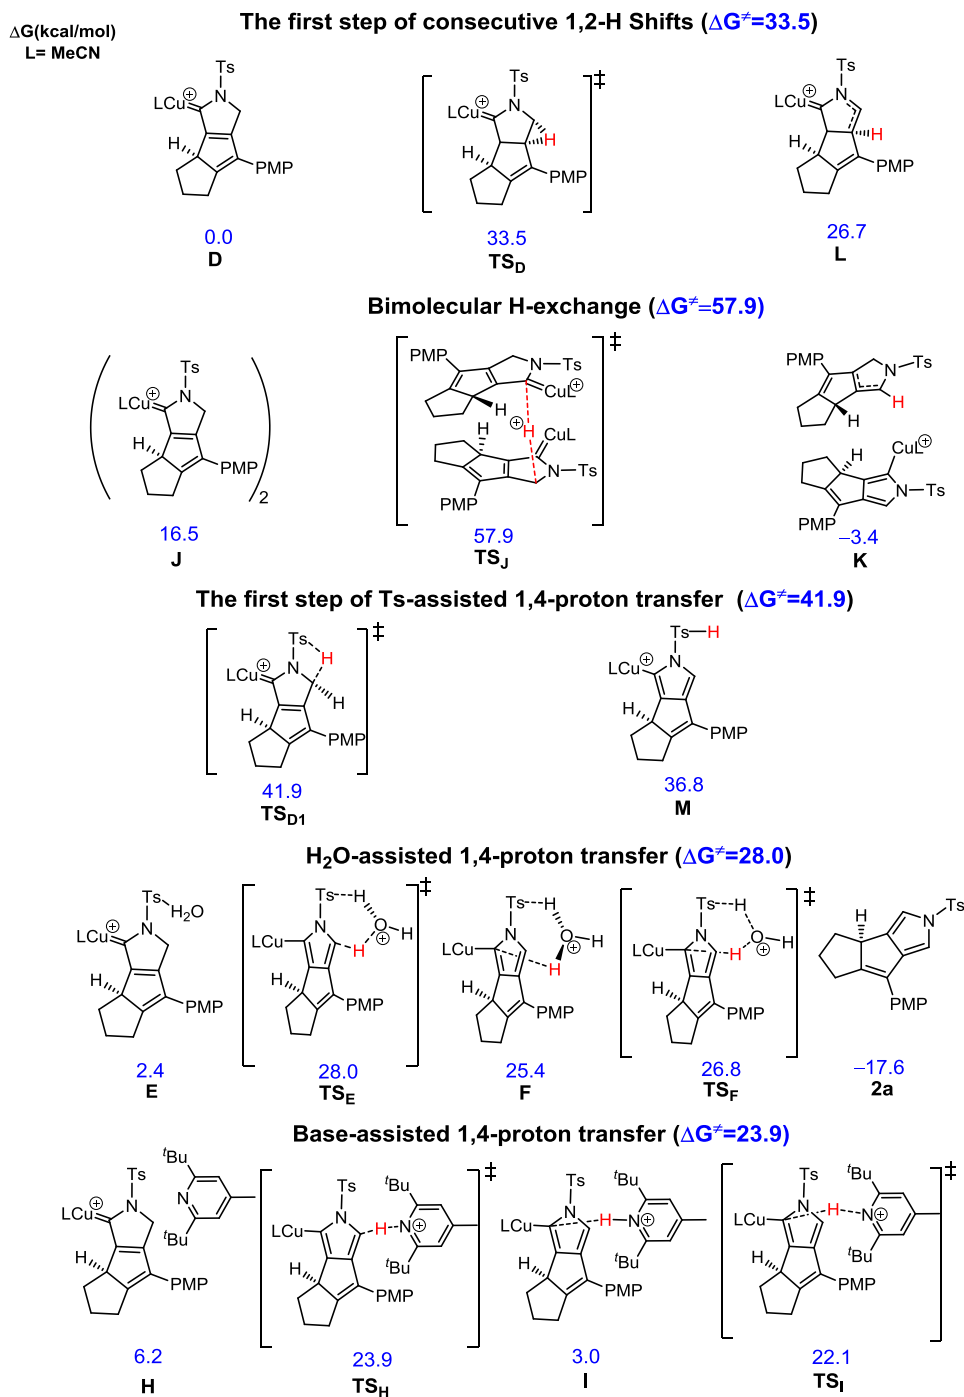

**Supplementary Figure 8.** Possible mechanisms for the [1,4]-H shift within the intermediate **D**. Relative free energies ( $\Delta G$ , in kcal/mol) were computed at the SMD(toluene)-M06/6-31G(d,p)&LANL2DZ level of theory.

Possible mechanisms concerned for the [1,4]-H shift within the intermediate **D** include consecutive [1,2]-H shifts, bimolecular H-exchange, Ts-assisted 1,4-proton transfer, H<sub>2</sub>O-assisted 1,4-proton transfer, and base-assisted 1,4-proton transfer (**Supplementary Figure 8**).

For the consecutive [1,2]-H shifts over the N-heterocycle, the first step (**D**→**L**) is predicted to be highly endothermic with a free energy change of 26.7 kcal/mol and a high activation barrier of 33.5 kcal/mol. The bimolecular H-exchange is even worse, suffering a very high activation barrier of 57.9 kcal/mol in free energy. The Ts group may work as H-bond acceptor and assist the 1,4-proton transfer. However, the Ts-assisted 1,4-proton transfer is stepwise and also suffers a high activation barrier of 41.9 kcal/mol and a highly unstable Ts-protonated intermediate **M**. As the experiments were performed in open air, it is likely that H<sub>2</sub>O may be involved in the reaction and facilitate the proton transfer process. Indeed, the H<sub>2</sub>O-assisted proton transfer is found to be stepwise via an intermediate **F** with a slightly lower activation barrier (28.0 kcal/mol). The use of a hindered base, 2,6-di-*tert*-butyl-4-methylpyridine, lowers the activation barrier by 4.1 kcal/mol and the relative energy of the protonated intermediate (**I**) by over 20.0 kcal/mol. It should be noted that the 1,4-proton transfer assisted by H<sub>2</sub>O or organic base is rate-limiting for the whole process. In accordance with such theoretical prediction, complementary experiments did disclose that the use of the organic base as additive accelerates the catalytic process significantly.

#### S4. Revised mechanism for Cu-catalyzed synthesis of 4a/6a from diyne substrate

3a/5a<sup>4,20</sup>

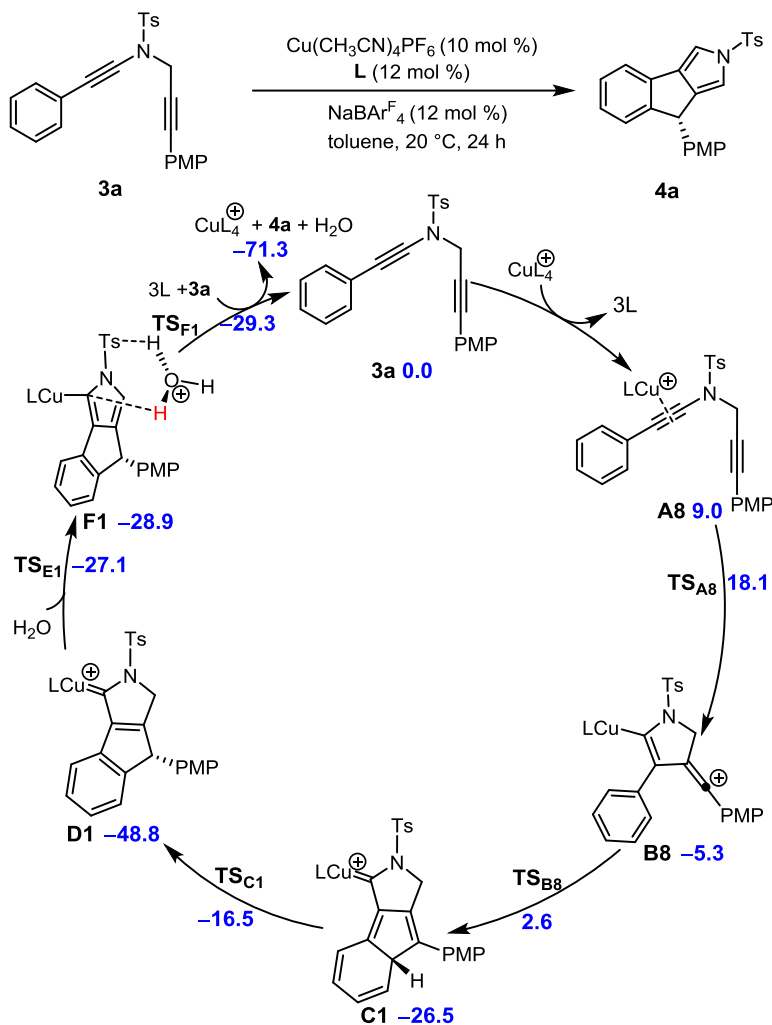

**Supplementary Figure 9.** Revised mechanism for the synthesis of **4a** (L = MeCN) from diyne substrate **3a**. Relative free energies ( $\Delta G$ , in kcal/mol) of the key intermediates and transition states are calculated at the SMD(toluene)-M06/6-31G(d,p)&LANL2DZ level of theory at 298 K.

Our DFT computations disclosed that the mechanism for Cu(I)-catalyzed synthesis of tricyclic pyrrole **4a** from *N*-propargyl ynamide **3a**<sup>4</sup> (**Supplementary Figure 9**) is quite similar to that for the synthesis of **2a** from **1a**, i.e., preferential coordination and activation of the electron-rich amide-tethered C $\equiv$ C bonds to Cu(I) catalyst, intramolecular cyclization due to electrophilic attack of the copper-activated C $\equiv$ C bonds

to the *N*-propargyl moiety to give the vinyl-cation intermediate **B8**, intramolecular cyclization due to electrophilic addition of the vinyl-cation to the phenyl group to form the cyclopentadiene intermediate **C1**, a normal suprafacial [1,5]-H shift within the cyclopentadienic ring, H<sub>2</sub>O-assisted 1,4-proton transfer with the N-heterocycle, and a final demetallation to afford **4a**. The computed activation barrier in free energy is 9.1 kcal/mol for the formation of vinyl-cation, 7.8 kcal/mol for the electrophilic addition of vinyl-cation, 10.0 kcal/mol for the suprafacial 1,5-H shift step, and 21.7 kcal/mol for the H<sub>2</sub>O-assisted 1,4-proton transfer. As such, the whole process can occur smoothly with the H<sub>2</sub>O-assisted 1,4-proton transfer being rate determining.

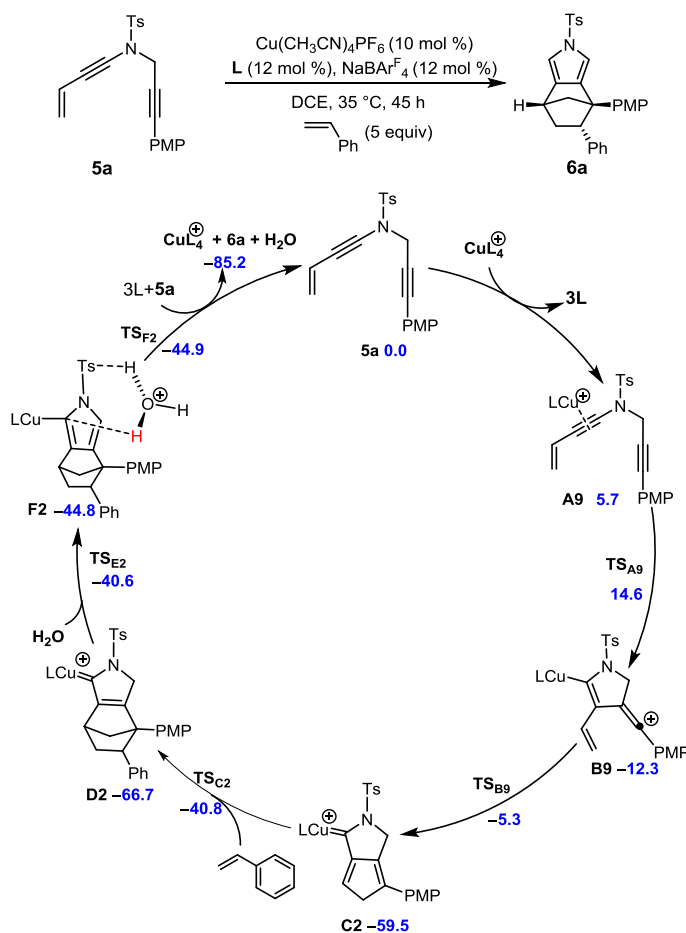

**Supplementary Figure 10.** Revised mechanism for the formation of product **6a** (**L** = MeCN). Relative free energies ( $\Delta G$ , in kcal/mol) of the key intermediates and transition states are calculated at the SMD(DCE)-M06/6-31G(d,p)/LANL2DZ level of theory at 298 K.

The vinyl-cation-based mechanism also well accounts for the Cu(I)-catalyzed synthesis of **6a** from substrate **5a** and styrene.<sup>20</sup> As shown in **Supplementary Figure 10**, following the formation of the vinyl-cation intermediate **B9** occurs readily the intramolecular cyclization with a free energy barrier of only 7.0 kcal/mol to form the cyclopentadiene intermediate **C2**. Further [4 + 2] cycloaddition of **C2** with the dienophile styrene is found to be exergonic ( $\Delta G = -7.2$  kcal/mol) with a free energy barrier of 18.7 kcal/mol. Subsequent H<sub>2</sub>O-assisted 1,4-proton transfer with a free energy barrier of 26.1 kcal/mol turns out to be rate limiting for the whole process.

### Reference:

1. R. B. Dateer, K. Pati and R.-S. Liu, *Chem. Commun.*, 2012, **48**, 7200.
2. S. Hajra and D. Sinha, *J. Org. Chem.*, 2011, **76**, 7334.
3. R. K. Shiroodi, M. Sugawara, M. Ratushnyy, D. C. Yarbrough, D. J. Wink and V. Gevorgyan, *Org. Lett.*, 2015, **17**, 4062.
4. F.-L. Hong, Z.-S. Wang, D.-D. Wei, T.-Y. Zhai, G.-C. Deng, X. Lu, R.-S. Liu and L.-W. Ye, *J. Am. Chem. Soc.*, 2019, **141**, 16961.
5. R. Sharma, K. Kumar, M. Chouhan, V. Groverb and V. A. Nair, *RSC Adv.*, 2013, **3**, 14521.
6. J. Zheng, J.-H. Lin, L.-Y. Yu, Y. Wei, X. Zheng and J.-C. Xiao, *Org. Lett.*, 2015, **17**, 6150.
7. H. T. You, A. C. Grosse, J. K. Howard, C. J. T. Hyland, J. Just, P. P. Molesworth and J. A. Smith, *Org. Biomol. Chem.*, 2011, **9**, 3948.
8. F. K. Signaigo and H. Adkins, *J. Am. Chem. Soc.*, 1936, **58**, 709.
9. J. T. Reeves, D. R. Fandrick, Z. Tan, J. J. Song, H. Lee, N. K. Yee and C. H. Senanayake, *Org. Lett.*, 2010, **12**, 4388.
10. G. Kumaraswamy, A. N. Murthy and A. Pitchaiah, *J. Org. Chem.*, 2010, **75**, 3916.
11. M. J. Frisch, G. W. Trucks, H. B. Schlegel, G. E. Scuseria, M. A. Robb, J. R. Cheeseman, G. Scalmani, V. Barone, B. Mennucci, G. A. Petersson, H. Nakatsuji, M. Caricato, X. Li, H. P. Hratchian, A. Izmaylov, F. Bloino, J. G. Zheng, J. L. Sonnenberg, M. Hada, M. Ehara, K. Toyota, R. Fukuda, J. Hasegawa, M. Ishida, T. Nakajima, Y. Honda, O. Kitao, H. Nakai, T. Vreven, Jr., J. A. Montgomery, J. E. Peralta, F. Ogliaro,



- M. Bearpark, J. J. Heyd, E. Brothers, K. N. Kudin, V. N. Staroverov, T. Keith, R. Kobayashi, J. Normand, K. Raghavachari, A. Rendell, J. C. Burant, S. S. Iyengar, J. Tomasi, M. Cossi, N. Rega, J. M. Millam, M. Klene, J. E. Knox, J. B. Cross, V. Bakken, C. Adamo, J. Jaramillo, R. Gomperts, R. E. Stratmann, O. Yazyev, A. J. Austin, R. Cammi, C. Pomelli, J. W. Ochterski, R. L. Martin, K. Morokuma, V. G. Zakrzewski, G. A. Voth, P. Salvador, J. J. Dannenberg, S. Dapprich, A. D. Daniels, O. Farkas, J. B. Foresman, J. V. Ortiz, J. Cioslowski and D. J. Fox, *Gaussian 09, Revision E.01*, Gaussian, Inc., Wallingford CT, 2013.
12. Y. Zhao and D. G. Truhlar, *Theor. Chem. Acc.*, 2008, **120**, 215.
  13. W. R. Wadt and P. J. Hay, *J. Chem. Phys.*, 1985, **82**, 284.
  14. P. J. Hay and W. R. Wadt, *J. Chem. Phys.*, 1985, **82**, 270.
  15. R. Ditchfield, W. J. Hehre and J. A. Pople, *J. Chem. Phys.*, 1971, **54**, 724.
  16. W. J. Hehre, R. Ditchfield and J. A. Pople, *J. Chem. Phys.*, 1972, **56**, 2257.
  17. F. Weigend and R. Ahlrichs, *Phys Chem Chem Phys.*, 2005, **7**, 3297.
  18. A. V. Marenich, C. J. Cramer and D. G. Truhlar, *J. Phys. Chem. B*, 2009, **113**, 6378.
  19. CYLview, b. L., C. Y., Universit de Sherbrooke, 2009, (<http://www.cylview.org>).
  20. F.-L. Hong, Y.-B. Chen, S.-H. Ye, G.-Y. Zhu, X.-Q. Zhu, X. Lu, R.-S. Liu and L.-W. Ye, *J. Am. Chem. Soc.*, 2020, **142**, 7618.

## XYZ Coordinates

1a

|   |             |             |             |
|---|-------------|-------------|-------------|
| C | -1.19241500 | 2.16063300  | 0.05411800  |
| C | -1.07325300 | 0.95436300  | -0.04549400 |
| N | -0.92766200 | -0.37611000 | -0.10345300 |
| C | -0.18735500 | -1.08933200 | 0.95924100  |
| C | 1.25106800  | -1.03484300 | 0.76126900  |
| C | 2.45135200  | -0.98316300 | 0.60138400  |
| C | 3.86042700  | -0.92691900 | 0.39453500  |
| C | 4.46002900  | -1.65412600 | -0.64934800 |
| C | 4.67703500  | -0.14491300 | 1.21841600  |
| C | 5.82334400  | -1.59380500 | -0.85692800 |
| H | 3.83460700  | -2.26443600 | -1.29674500 |
| C | 6.05031900  | -0.08044200 | 1.01832600  |
| H | 4.22326500  | 0.42260100  | 2.02788100  |
| C | 6.62907200  | -0.80568200 | -0.02604400 |
| H | 6.29904400  | -2.14772300 | -1.66240900 |
| H | 6.65750000  | 0.53634800  | 1.67434600  |
| S | -1.82087600 | -1.27192100 | -1.25329400 |
| O | -1.11442600 | -2.53477400 | -1.39146500 |
| O | -2.04441500 | -0.37783100 | -2.37274000 |
| C | -3.36377800 | -1.57014900 | -0.43997500 |
| C | -3.57641400 | -2.78558100 | 0.20247700  |
| C | -4.32408800 | -0.55894800 | -0.42024300 |
| C | -4.77593900 | -2.98794100 | 0.87427700  |
| H | -2.81939500 | -3.56463700 | 0.15670400  |
| C | -5.51223100 | -0.78135400 | 0.25772600  |
| H | -4.14273400 | 0.38081600  | -0.93636500 |
| C | -5.75647100 | -1.99471800 | 0.91252700  |
| H | -4.95800000 | -3.93768000 | 1.37433800  |
| H | -6.27316200 | -0.00263600 | 0.27957800  |

|   |             |             |             |
|---|-------------|-------------|-------------|
| C | -7.05802300 | -2.22106600 | 1.61546400  |
| H | -7.32716300 | -1.36415900 | 2.24378800  |
| H | -7.87356600 | -2.35502400 | 0.89334900  |
| H | -7.02703100 | -3.11350500 | 2.24853600  |
| H | -0.46742900 | -0.64158300 | 1.92134500  |
| H | -0.53603100 | -2.12911300 | 0.97235300  |
| C | -1.31043200 | 3.57023200  | 0.08075200  |
| C | -1.34107600 | 4.36082100  | 1.16874700  |
| C | -1.31545100 | 4.39720400  | -1.18803400 |
| C | -1.35725400 | 5.81213100  | 0.79836300  |
| H | -1.29588100 | 3.99834600  | 2.19268300  |
| C | -1.74192600 | 5.78384300  | -0.68987800 |
| H | -1.98333600 | 3.98746200  | -1.95514800 |
| H | -0.30545200 | 4.40233300  | -1.62461300 |
| H | -2.05198700 | 6.40554500  | 1.40680300  |
| H | -0.36063200 | 6.25741700  | 0.95263900  |
| H | -1.29432000 | 6.60116800  | -1.26466800 |
| H | -2.83140800 | 5.88027900  | -0.78016000 |
| O | 7.94890700  | -0.80959200 | -0.31247100 |
| C | 8.80101900  | -0.01788600 | 0.48417800  |
| H | 9.80772300  | -0.14177400 | 0.07855800  |
| H | 8.52840300  | 1.04579200  | 0.43891400  |
| H | 8.79876800  | -0.34491400 | 1.53344400  |

**Cu(MeCN)<sub>4</sub><sup>⊕</sup>**

|   |             |             |             |
|---|-------------|-------------|-------------|
| N | -1.41633300 | 0.72258900  | -0.92420500 |
| N | -1.50798800 | 0.40612600  | 2.38904000  |
| N | -3.95749900 | -0.91934900 | 0.58719500  |
| C | -0.68762800 | 0.77037700  | -1.82247300 |
| C | -0.85409000 | 0.20709300  | 3.32338600  |
| C | -4.69686200 | -1.80537300 | 0.49486400  |

|    |             |             |             |
|----|-------------|-------------|-------------|
| C  | -0.03744000 | -0.04698600 | 4.48784200  |
| C  | 0.22237000  | 0.83071900  | -2.94294300 |
| C  | -5.61941000 | -2.91108900 | 0.37878600  |
| H  | 0.72742900  | 0.72881500  | 4.58720500  |
| H  | -0.65904600 | -0.04986000 | 5.38802000  |
| H  | 0.45373100  | -1.01991600 | 4.39301200  |
| H  | 0.46552600  | 1.87256900  | -3.17160800 |
| H  | 1.14555900  | 0.29420700  | -2.70452500 |
| H  | -0.23733400 | 0.37187700  | -3.82314200 |
| H  | -5.17679600 | -3.81469400 | 0.80788700  |
| H  | -6.54679800 | -2.68217100 | 0.91220800  |
| H  | -5.85178500 | -3.09539800 | -0.67428400 |
| Cu | -2.66642300 | 0.67391200  | 0.70143200  |
| C  | -5.04182300 | 4.65079700  | 1.06436300  |
| H  | -5.88125000 | 4.66060800  | 0.36285100  |
| H  | -4.38587200 | 5.49789300  | 0.84348300  |
| H  | -5.42849000 | 4.75687900  | 2.08216300  |
| C  | -4.30888700 | 3.41208000  | 0.94051400  |
| N  | -3.72179300 | 2.41927700  | 0.84144700  |

## A

|   |             |             |             |
|---|-------------|-------------|-------------|
| C | 0.18105600  | 1.72337800  | -1.15415800 |
| C | 0.72421300  | 0.70041600  | -0.69978300 |
| N | 1.04836600  | -0.60429600 | -0.58567000 |
| C | 0.23780800  | -1.62133900 | -1.30597100 |
| C | -1.14579600 | -1.66959600 | -0.87805000 |
| C | -2.31091200 | -1.69967200 | -0.54287400 |
| C | -3.67509700 | -1.75945000 | -0.13997500 |
| C | -4.09624000 | -2.70168600 | 0.81630300  |
| C | -4.62582300 | -0.89242500 | -0.69076400 |
| C | -5.41983700 | -2.77163700 | 1.19812500  |

|   |             |             |             |
|---|-------------|-------------|-------------|
| H | -3.36576400 | -3.37979200 | 1.25124100  |
| C | -5.95953100 | -0.95427000 | -0.31021300 |
| H | -4.30962600 | -0.16028800 | -1.43090100 |
| C | -6.36307700 | -1.90020800 | 0.63716200  |
| H | -5.76045400 | -3.49663700 | 1.93286600  |
| H | -6.67643400 | -0.26976100 | -0.75372800 |
| S | 1.87722800  | -1.10255500 | 0.83187300  |
| O | 1.01039400  | -1.94888400 | 1.62724300  |
| O | 2.39068500  | 0.16229700  | 1.38600500  |
| C | 3.21035100  | -2.04663600 | 0.18585900  |
| C | 3.25733200  | -3.41255500 | 0.44290300  |
| C | 4.19784100  | -1.40006100 | -0.56044500 |
| C | 4.32431800  | -4.14493100 | -0.06322100 |
| H | 2.47587300  | -3.88624400 | 1.03174000  |
| C | 5.24962800  | -2.15057200 | -1.05278100 |
| H | 4.14020400  | -0.32971100 | -0.74788400 |
| C | 5.33029500  | -3.53037100 | -0.81105400 |
| H | 4.37952500  | -5.21426700 | 0.12938800  |
| H | 6.03270100  | -1.66655200 | -1.63384800 |
| C | 6.48327100  | -4.31520100 | -1.34788600 |
| H | 6.54789000  | -4.22438500 | -2.43875500 |
| H | 7.43204400  | -3.94301700 | -0.94261200 |
| H | 6.40248500  | -5.37717200 | -1.09873700 |
| H | 0.31911000  | -1.37866700 | -2.37272300 |
| H | 0.74102000  | -2.58814100 | -1.16597500 |
| C | -0.47716600 | 2.89610700  | -1.59278300 |
| C | -0.41697100 | 3.39997700  | -2.84135600 |
| C | -1.44543600 | 3.67803800  | -0.72959600 |
| C | -1.33288000 | 4.56818900  | -3.00063400 |
| H | 0.17744600  | 2.97697700  | -3.64734500 |
| C | -1.66658400 | 4.95602600  | -1.55039700 |

|    |             |             |             |
|----|-------------|-------------|-------------|
| H  | -1.04394000 | 3.87143500  | 0.27403400  |
| H  | -2.37129200 | 3.10032100  | -0.59311800 |
| H  | -0.88186000 | 5.38490600  | -3.57684300 |
| H  | -2.22887100 | 4.25925900  | -3.56196600 |
| H  | -2.67515900 | 5.36427700  | -1.43948600 |
| H  | -0.96335200 | 5.72832000  | -1.21505700 |
| O  | -7.62920800 | -2.04867200 | 1.07134200  |
| C  | -8.62159100 | -1.20096400 | 0.53207400  |
| H  | -9.56230800 | -1.48593500 | 1.00767200  |
| H  | -8.41634800 | -0.14465600 | 0.75414300  |
| H  | -8.71847800 | -1.33065100 | -0.55457700 |
| Cu | 1.52820100  | 2.02566900  | 0.56732600  |
| N  | 2.11573900  | 3.49648000  | 1.62712000  |
| C  | 2.48632100  | 4.32795600  | 2.34092100  |
| C  | 2.94865500  | 5.36180300  | 3.23155200  |
| H  | 2.83038600  | 6.34164800  | 2.75932200  |
| H  | 2.36810900  | 5.33845100  | 4.15860700  |
| H  | 4.00503700  | 5.20166400  | 3.46751000  |

### TSA

Number of imaginary frequencies: 1

Lowest frequency ( $\text{cm}^{-1}$ ): -482.0

|   |             |             |             |
|---|-------------|-------------|-------------|
| C | 0.38341200  | 0.74012300  | -0.25745500 |
| C | -0.86507200 | 0.65210300  | -0.61868900 |
| N | -1.31844800 | -0.36223000 | -1.42941800 |
| C | -0.35134900 | -1.43877700 | -1.74951100 |
| C | 0.96179700  | -1.00671900 | -1.28150600 |
| C | 2.18150900  | -1.09683000 | -1.10579900 |
| C | 3.53363000  | -1.01198700 | -0.75597700 |
| C | 3.95035200  | -1.35627200 | 0.54561700  |
| C | 4.49474800  | -0.53376600 | -1.67793400 |

|    |             |             |             |
|----|-------------|-------------|-------------|
| C  | 5.27401500  | -1.22951900 | 0.92522200  |
| H  | 3.21318300  | -1.72773000 | 1.25430400  |
| C  | 5.81189900  | -0.41242700 | -1.30898000 |
| H  | 4.17818600  | -0.26586000 | -2.68335500 |
| C  | 6.21425800  | -0.75876500 | -0.00430300 |
| H  | 5.57616700  | -1.50155400 | 1.93189100  |
| H  | 6.56784700  | -0.05222800 | -2.00131700 |
| S  | -2.96564200 | -0.70108700 | -1.57026700 |
| O  | -3.11233800 | -1.38418000 | -2.84284100 |
| O  | -3.64347400 | 0.56195900  | -1.28672400 |
| C  | -3.31617400 | -1.84196700 | -0.26798700 |
| C  | -3.33395400 | -3.20606600 | -0.54369800 |
| C  | -3.52489200 | -1.35882800 | 1.02470100  |
| C  | -3.56378700 | -4.09723000 | 0.49761900  |
| H  | -3.19263900 | -3.55886700 | -1.56245000 |
| C  | -3.75189900 | -2.26482900 | 2.04738300  |
| H  | -3.53112600 | -0.28847300 | 1.21894900  |
| C  | -3.77367200 | -3.64410800 | 1.80135800  |
| H  | -3.58900700 | -5.16600000 | 0.29399200  |
| H  | -3.92588100 | -1.90287100 | 3.05960300  |
| C  | -4.02934400 | -4.60255200 | 2.92076400  |
| H  | -3.29324600 | -4.47811900 | 3.72418900  |
| H  | -5.01718800 | -4.43283700 | 3.36622000  |
| H  | -3.98822800 | -5.64181300 | 2.58129700  |
| H  | -0.64394400 | -2.37207600 | -1.24179500 |
| H  | -0.35081900 | -1.62390800 | -2.82949800 |
| Cu | -2.05467300 | 2.06819000  | -0.05813300 |
| N  | -3.12325600 | 3.50800700  | 0.54420400  |
| C  | -3.83235400 | 4.37032500  | 0.84791000  |
| C  | -4.71568000 | 5.44499700  | 1.22497100  |
| H  | -5.61559300 | 5.42000400  | 0.60328200  |

|   |             |             |             |
|---|-------------|-------------|-------------|
| H | -5.00299700 | 5.33979800  | 2.27537900  |
| H | -4.21235700 | 6.40650100  | 1.08595000  |
| C | 1.49802000  | 1.45115300  | 0.25375200  |
| C | 1.91065900  | 1.43412700  | 1.53834500  |
| C | 2.39043800  | 2.33728700  | -0.58957900 |
| C | 3.09146900  | 2.32450700  | 1.74635100  |
| H | 1.41188600  | 0.88151500  | 2.33188600  |
| C | 3.60937000  | 2.55515400  | 0.31659400  |
| H | 1.86366000  | 3.27567600  | -0.82017800 |
| H | 2.64227200  | 1.87439300  | -1.55226600 |
| H | 2.76675100  | 3.26258600  | 2.22464400  |
| H | 3.84108800  | 1.88847700  | 2.41873100  |
| H | 4.36629500  | 1.79332700  | 0.08371700  |
| H | 4.07651500  | 3.53535700  | 0.18357500  |
| O | 7.51400000  | -0.60497200 | 0.25452700  |
| C | 7.99963700  | -0.94219000 | 1.54488800  |
| H | 9.07244900  | -0.74490900 | 1.52621200  |
| H | 7.53414500  | -0.32179200 | 2.32109500  |
| H | 7.83257300  | -2.00325900 | 1.76851900  |

## **B**

|   |             |             |             |
|---|-------------|-------------|-------------|
| C | -0.30970100 | -1.06588700 | -0.05156500 |
| C | 0.93916900  | -0.71769800 | -0.51919900 |
| N | 0.81853600  | 0.40758300  | -1.32110600 |
| C | -0.53405000 | 0.97840400  | -1.29505600 |
| C | -1.29467900 | -0.09642900 | -0.54438100 |
| C | -2.59511300 | -0.06123000 | -0.42854600 |
| C | -3.95001600 | 0.02541700  | -0.38916400 |
| C | -4.76077400 | -0.57949300 | -1.40770900 |
| C | -4.60350100 | 0.73313500  | 0.66955500  |
| C | -6.11819800 | -0.46818500 | -1.36987800 |



|   |             |             |             |
|---|-------------|-------------|-------------|
| H | -4.26643700 | -1.12374600 | -2.20815700 |
| C | -5.96607100 | 0.85167000  | 0.70729800  |
| H | -3.98833900 | 1.18034400  | 1.44637500  |
| C | -6.73633700 | 0.25153900  | -0.31676100 |
| H | -6.75824900 | -0.91129500 | -2.12726700 |
| H | -6.44699900 | 1.39580200  | 1.51341200  |
| S | 2.12007200  | 1.40251200  | -1.73069200 |
| O | 1.61544500  | 2.25910100  | -2.79107900 |
| O | 3.25967900  | 0.51739200  | -1.92875700 |
| C | 2.42304400  | 2.39509700  | -0.29827100 |
| C | 1.84426800  | 3.65856400  | -0.21092400 |
| C | 3.20854800  | 1.88559400  | 0.73581700  |
| C | 2.05510300  | 4.41691300  | 0.93338900  |
| H | 1.25894800  | 4.04631900  | -1.04117000 |
| C | 3.40594900  | 2.65866600  | 1.86925100  |
| H | 3.67174500  | 0.90492600  | 0.64138500  |
| C | 2.83554000  | 3.93201500  | 1.98597900  |
| H | 1.61533400  | 5.40981200  | 1.01009100  |
| H | 4.02279800  | 2.27646700  | 2.68105000  |
| C | 3.09216400  | 4.76666400  | 3.20062000  |
| H | 3.10164600  | 4.15903500  | 4.11211400  |
| H | 4.07095100  | 5.25864000  | 3.13249100  |
| H | 2.33951300  | 5.55282300  | 3.31839100  |
| H | -0.55477100 | 1.92811600  | -0.74091100 |
| H | -0.91430300 | 1.14977400  | -2.30601400 |
| C | -0.63580400 | -2.21733300 | 0.76044500  |
| C | -1.84934000 | -2.61299000 | 1.18359700  |
| C | 0.41791700  | -3.19942600 | 1.21505700  |
| C | -1.79322800 | -3.88960800 | 1.96892600  |
| H | -2.78716300 | -2.11098400 | 0.95061800  |
| C | -0.29782700 | -4.02056700 | 2.29555100  |

|    |             |             |             |
|----|-------------|-------------|-------------|
| H  | 1.32620600  | -2.70056600 | 1.58585800  |
| H  | 0.73569900  | -3.82323600 | 0.36309200  |
| H  | -2.42168000 | -3.87614400 | 2.86899300  |
| H  | -2.15124400 | -4.73554800 | 1.35969200  |
| H  | 0.04497900  | -5.05922500 | 2.34264900  |
| H  | -0.10458100 | -3.56887700 | 3.27688600  |
| O  | -8.04973200 | 0.30836100  | -0.37352100 |
| C  | -8.77848900 | 1.01963800  | 0.63017300  |
| H  | -9.82850800 | 0.93359600  | 0.35061300  |
| H  | -8.62351400 | 0.56800700  | 1.61612200  |
| H  | -8.48828500 | 2.07586800  | 0.64415800  |
| Cu | 2.63835000  | -1.58122000 | -0.34095100 |
| N  | 4.33754600  | -2.39389900 | -0.22101700 |
| C  | 5.40299600  | -2.84518000 | -0.23096400 |
| C  | 6.73131500  | -3.40576900 | -0.24609800 |
| H  | 7.13400800  | -3.43919900 | 0.77048200  |
| H  | 6.70094500  | -4.42113300 | -0.65219900 |
| H  | 7.38497400  | -2.79015400 | -0.87123500 |

### TS<sub>B</sub>

Number of imaginary frequencies: 1

Lowest frequency (cm<sup>-1</sup>): -241.9

|   |             |             |             |
|---|-------------|-------------|-------------|
| C | 0.19886400  | -1.31793200 | -0.20081700 |
| C | -1.05046000 | -0.82554700 | 0.20416600  |
| N | -0.80729200 | 0.36220900  | 0.82060500  |
| C | 0.61397600  | 0.75276300  | 0.86291700  |
| C | 1.25632200  | -0.47608000 | 0.27919900  |
| C | 2.54074400  | -0.86939200 | 0.30720600  |
| C | 3.82699400  | -0.31868600 | 0.17805100  |
| C | 4.07650800  | 0.81038000  | -0.64847700 |
| C | 4.91737000  | -0.88475700 | 0.87733900  |

|    |             |             |             |
|----|-------------|-------------|-------------|
| C  | 5.33433500  | 1.34837700  | -0.74605800 |
| H  | 3.25042600  | 1.24515500  | -1.20857000 |
| C  | 6.18368700  | -0.34445000 | 0.79746400  |
| H  | 4.73348700  | -1.76008500 | 1.49602900  |
| C  | 6.39996100  | 0.77820800  | -0.02024300 |
| H  | 5.54505200  | 2.21315500  | -1.36955800 |
| H  | 7.00059800  | -0.78868300 | 1.35740600  |
| S  | -2.00420900 | 1.33082800  | 1.57044500  |
| O  | -1.36178700 | 1.90624500  | 2.73790900  |
| O  | -3.18891200 | 0.49076900  | 1.67393200  |
| C  | -2.28911100 | 2.59427100  | 0.37399100  |
| C  | -1.66485600 | 3.82927600  | 0.52287100  |
| C  | -3.11856500 | 2.31859200  | -0.71211900 |
| C  | -1.88395200 | 4.80579100  | -0.43984300 |
| H  | -1.03342900 | 4.02286300  | 1.38672900  |
| C  | -3.32068900 | 3.30717100  | -1.66154300 |
| H  | -3.60344400 | 1.34867900  | -0.80331600 |
| C  | -2.71245500 | 4.56269500  | -1.53905600 |
| H  | -1.41011200 | 5.77992900  | -0.33381000 |
| H  | -3.96767300 | 3.10953600  | -2.51435400 |
| C  | -2.97239900 | 5.63156400  | -2.55219600 |
| H  | -3.89014900 | 6.18137400  | -2.30650700 |
| H  | -2.15760300 | 6.36138600  | -2.58863200 |
| H  | -3.10718800 | 5.21217300  | -3.55485700 |
| H  | 0.91516800  | 0.99623400  | 1.88657400  |
| H  | 0.79196800  | 1.62989100  | 0.22394400  |
| Cu | -2.79195900 | -1.61365900 | 0.16145800  |
| N  | -4.47880200 | -2.46158100 | 0.11855200  |
| C  | -5.52321800 | -2.95850900 | 0.14954700  |
| C  | -6.82446600 | -3.57741700 | 0.18865900  |
| H  | -7.01356400 | -4.10704600 | -0.74999400 |

|   |             |             |             |
|---|-------------|-------------|-------------|
| H | -6.87054200 | -4.29015400 | 1.01765100  |
| H | -7.59459200 | -2.81336700 | 0.33048900  |
| C | 0.60554700  | -2.52588300 | -0.80689100 |
| C | 1.91643000  | -2.67931800 | -1.19323500 |
| C | -0.12670400 | -3.83539100 | -0.85940800 |
| C | 2.23893500  | -4.12836400 | -1.42440500 |
| H | 2.51290700  | -1.86789900 | -1.60401800 |
| C | 0.84333400  | -4.75210000 | -1.62370100 |
| H | -1.11106900 | -3.74925800 | -1.33852900 |
| H | -0.31088000 | -4.19239100 | 0.16605900  |
| H | 2.90387200  | -4.29645900 | -2.27849700 |
| H | 2.74132900  | -4.55645800 | -0.54423500 |
| H | 0.79106700  | -5.79486700 | -1.29605300 |
| H | 0.59437400  | -4.73235600 | -2.69186400 |
| O | 7.58065300  | 1.37374500  | -0.17719500 |
| C | 8.70906800  | 0.86178500  | 0.51857800  |
| H | 8.92564700  | -0.17070600 | 0.21845600  |
| H | 9.55007200  | 1.49962000  | 0.24259100  |
| H | 8.56025700  | 0.90985300  | 1.60424000  |

**C**

|   |             |             |             |
|---|-------------|-------------|-------------|
| C | 0.07536200  | -1.40555900 | -0.31581700 |
| C | -1.20595000 | -0.92514900 | 0.10269700  |
| N | -0.95162100 | 0.25694500  | 0.66768100  |
| C | 0.48466600  | 0.68792700  | 0.73223900  |
| C | 1.13409800  | -0.48075300 | 0.07410000  |
| C | 2.35784600  | -0.98562500 | -0.22564100 |
| C | 3.67870200  | -0.41088900 | -0.02619700 |
| C | 3.86048900  | 0.76525100  | 0.72562600  |
| C | 4.82107400  | -1.00610800 | -0.57360500 |
| C | 5.11298800  | 1.30907400  | 0.92024600  |

|    |             |             |             |
|----|-------------|-------------|-------------|
| H  | 3.00261400  | 1.25784400  | 1.18018000  |
| C  | 6.08977400  | -0.46837100 | -0.39050600 |
| H  | 4.72535400  | -1.91141500 | -1.17074200 |
| C  | 6.24354300  | 0.69708500  | 0.36227600  |
| H  | 5.25220900  | 2.21447100  | 1.50569800  |
| H  | 6.94719700  | -0.96163400 | -0.83864400 |
| S  | -2.18319700 | 1.26162900  | 1.38702200  |
| O  | -1.64484700 | 1.66141100  | 2.67232500  |
| O  | -3.41424700 | 0.49230200  | 1.27158400  |
| C  | -2.21732600 | 2.63473500  | 0.29103700  |
| C  | -1.61531300 | 3.82860800  | 0.68224400  |
| C  | -2.83555000 | 2.49165600  | -0.95025800 |
| C  | -1.64397500 | 4.90168000  | -0.19649300 |
| H  | -1.14713400 | 3.91055800  | 1.66028300  |
| C  | -2.84711200 | 3.57673900  | -1.81196600 |
| H  | -3.30641600 | 1.55131300  | -1.23060800 |
| C  | -2.25776500 | 4.79413200  | -1.44884500 |
| H  | -1.18365500 | 5.84451600  | 0.09283700  |
| H  | -3.32481300 | 3.48599700  | -2.78554300 |
| C  | -2.30494100 | 5.97014700  | -2.37029100 |
| H  | -1.38296700 | 6.55882000  | -2.31891500 |
| H  | -2.46378400 | 5.66477100  | -3.40920500 |
| H  | -3.12986600 | 6.64017500  | -2.09621500 |
| H  | 0.75684900  | 0.83763200  | 1.78502200  |
| H  | 0.60505800  | 1.64397900  | 0.20168900  |
| Cu | -2.95789900 | -1.68873200 | 0.06584700  |
| N  | -4.64572500 | -2.53473000 | 0.04626600  |
| C  | -5.70289300 | -3.00220800 | 0.09564400  |
| C  | -7.02015000 | -3.58320600 | 0.15938200  |
| H  | -7.07660800 | -4.27924500 | 1.00179200  |
| H  | -7.76685700 | -2.79521400 | 0.29549400  |

|   |             |             |             |
|---|-------------|-------------|-------------|
| H | -7.23461900 | -4.12432200 | -0.76716800 |
| C | 0.61909500  | -2.50542200 | -0.90057400 |
| C | 2.10256800  | -2.30507500 | -0.92458600 |
| C | 0.25148200  | -3.92079900 | -1.16937900 |
| C | 2.55520500  | -3.66739800 | -0.36916600 |
| H | 2.43842000  | -2.24133200 | -1.97681300 |
| C | 1.62074100  | -4.64206100 | -1.10477500 |
| H | -0.25202900 | -4.05658200 | -2.13568600 |
| H | -0.44685300 | -4.28440100 | -0.40432500 |
| H | 3.61683500  | -3.87698200 | -0.53476800 |
| H | 2.37296700  | -3.69222500 | 0.71418000  |
| H | 1.55814100  | -5.62061700 | -0.62005400 |
| H | 1.99897900  | -4.80897900 | -2.12134700 |
| O | 7.42244000  | 1.30394300  | 0.60490300  |
| C | 8.59143100  | 0.71587300  | 0.07464900  |
| H | 8.56313800  | 0.67509300  | -1.02299500 |
| H | 9.42521500  | 1.34970300  | 0.38375400  |
| H | 8.74895700  | -0.29719300 | 0.46979900  |

### TSc

Number of imaginary frequencies: 1

Lowest frequency (cm<sup>-1</sup>): -1052.7

|   |             |             |             |
|---|-------------|-------------|-------------|
| C | -0.05439100 | -1.47016200 | 0.06787600  |
| C | 1.20706900  | -0.92221300 | -0.24234800 |
| N | 0.93425800  | 0.27390800  | -0.80795400 |
| C | -0.50925500 | 0.62197300  | -0.90193300 |
| C | -1.11580000 | -0.59638600 | -0.30240900 |
| C | -2.35615500 | -1.09848800 | 0.06628500  |
| C | -3.67630700 | -0.49340800 | -0.10292900 |
| C | -3.90391200 | 0.46079800  | -1.10849900 |
| C | -4.75331600 | -0.83414500 | 0.71937000  |

|    |             |             |             |
|----|-------------|-------------|-------------|
| C  | -5.14505900 | 1.04163100  | -1.28062600 |
| H  | -3.09795000 | 0.73366600  | -1.78749000 |
| C  | -6.00975900 | -0.26081500 | 0.55730000  |
| H  | -4.61021800 | -1.55096500 | 1.52587500  |
| C  | -6.21335600 | 0.68531200  | -0.44896400 |
| H  | -5.32214500 | 1.77462200  | -2.06387000 |
| H  | -6.81715600 | -0.55299000 | 1.22234000  |
| S  | 2.12870300  | 1.33360200  | -1.45395100 |
| O  | 1.56088300  | 1.84807300  | -2.68595200 |
| O  | 3.36990600  | 0.57157200  | -1.43419000 |
| C  | 2.19637000  | 2.61618600  | -0.24976900 |
| C  | 1.52891500  | 3.81202000  | -0.49383000 |
| C  | 2.89434000  | 2.39307100  | 0.93807500  |
| C  | 1.56728100  | 4.80472200  | 0.47738400  |
| H  | 1.00421200  | 3.96378600  | -1.43383300 |
| C  | 2.91505200  | 3.39510900  | 1.89248500  |
| H  | 3.42074200  | 1.45470100  | 1.10105000  |
| C  | 2.25377000  | 4.61279100  | 1.67825700  |
| H  | 1.05817800  | 5.74992900  | 0.29963100  |
| H  | 3.45655700  | 3.24178600  | 2.82456700  |
| C  | 2.30008900  | 5.68271600  | 2.72173900  |
| H  | 1.70156300  | 6.55305800  | 2.43682100  |
| H  | 1.92710100  | 5.31216200  | 3.68408400  |
| H  | 3.32973400  | 6.02136100  | 2.88968200  |
| H  | -0.76738200 | 0.78457000  | -1.95566100 |
| H  | -0.71452000 | 1.55020100  | -0.34915600 |
| Cu | 2.98443500  | -1.61989300 | -0.13566200 |
| N  | 4.69264100  | -2.41946600 | -0.07136600 |
| C  | 5.76500600  | -2.85249600 | -0.10673600 |
| C  | 7.10229700  | -3.38818400 | -0.15340600 |
| H  | 7.76004900  | -2.79744900 | 0.49124500  |

|   |             |             |             |
|---|-------------|-------------|-------------|
| H | 7.10178700  | -4.42683400 | 0.18946100  |
| H | 7.47969700  | -3.34899100 | -1.17957700 |
| C | -0.62354400 | -2.60130900 | 0.69819200  |
| C | -2.06399000 | -2.36406500 | 0.69640900  |
| C | -0.33506900 | -4.03101600 | 1.02833500  |
| C | -2.76925800 | -3.65244300 | 1.01362100  |
| H | -1.31105800 | -2.12132000 | 1.73365800  |
| C | -1.65967700 | -4.50588500 | 1.65868600  |
| H | 0.53541800  | -4.18803500 | 1.67266900  |
| H | -0.14343900 | -4.55685700 | 0.08212200  |
| H | -3.65406600 | -3.55814000 | 1.64926600  |
| H | -3.09983300 | -4.08654000 | 0.05923200  |
| H | -1.82564100 | -5.57818600 | 1.52907000  |
| H | -1.63654900 | -4.30864100 | 2.73900300  |
| O | -7.38604900 | 1.30496100  | -0.69528400 |
| C | -8.49538600 | 0.96575000  | 0.10835500  |
| H | -8.31700100 | 1.20267700  | 1.16649500  |
| H | -9.33421000 | 1.56552700  | -0.25115200 |
| H | -8.75366300 | -0.09814000 | 0.01501000  |

## **D**

|   |             |             |             |
|---|-------------|-------------|-------------|
| C | -0.09766400 | -1.39201700 | 0.22251800  |
| C | 1.16574700  | -0.91357300 | -0.18817100 |
| N | 0.91054800  | 0.26187100  | -0.81342700 |
| C | -0.51694900 | 0.63463600  | -0.83838100 |
| C | -1.10628500 | -0.51324000 | -0.11407700 |
| C | -2.39994900 | -0.98208200 | 0.32447300  |
| C | -3.69733100 | -0.36144600 | 0.06037300  |
| C | -3.87363300 | 0.54926100  | -0.99440200 |
| C | -4.81176100 | -0.66176800 | 0.85008100  |
| C | -5.10291700 | 1.12376000  | -1.24937400 |



|    |             |             |             |
|----|-------------|-------------|-------------|
| H  | -3.03834200 | 0.79847300  | -1.64556200 |
| C  | -6.05620300 | -0.09384900 | 0.60582600  |
| H  | -4.70433200 | -1.33792500 | 1.69583700  |
| C  | -6.20896700 | 0.80600500  | -0.45174200 |
| H  | -5.24118700 | 1.82478000  | -2.06867600 |
| H  | -6.89480000 | -0.35043600 | 1.24631800  |
| S  | 2.10045100  | 1.28191900  | -1.52589900 |
| O  | 1.45542600  | 1.84971200  | -2.69465500 |
| O  | 3.30239100  | 0.46742700  | -1.61869100 |
| C  | 2.32445400  | 2.53190300  | -0.30473100 |
| C  | 1.67418700  | 3.75397800  | -0.45299100 |
| C  | 3.12818700  | 2.25742700  | 0.80093700  |
| C  | 1.83820200  | 4.71749800  | 0.53291800  |
| H  | 1.06547400  | 3.94887600  | -1.33251200 |
| C  | 3.27381200  | 3.23303000  | 1.77392700  |
| H  | 3.63799300  | 1.30018200  | 0.88898900  |
| C  | 2.63506800  | 4.47373500  | 1.65558400  |
| H  | 1.34318300  | 5.68120300  | 0.42894500  |
| H  | 3.89834200  | 3.03582300  | 2.64328100  |
| C  | 2.82947600  | 5.52794500  | 2.69799500  |
| H  | 1.97178100  | 6.20563800  | 2.75264300  |
| H  | 2.98881500  | 5.09044800  | 3.68906900  |
| H  | 3.71183300  | 6.13885500  | 2.46768900  |
| H  | -0.84705300 | 0.72804400  | -1.88094400 |
| H  | -0.68245400 | 1.60051500  | -0.33949700 |
| Cu | 2.91442400  | -1.68037700 | -0.12122200 |
| N  | 4.60455000  | -2.52117700 | -0.07269900 |
| C  | 5.65148400  | -3.01278200 | -0.10258500 |
| C  | 6.95584000  | -3.62466600 | -0.14012500 |
| H  | 7.00657000  | -4.33708600 | -0.96913400 |
| H  | 7.72199300  | -2.85642000 | -0.28098900 |

|   |             |             |             |
|---|-------------|-------------|-------------|
| H | 7.14649500  | -4.15331800 | 0.79878400  |
| C | -0.68752800 | -2.51779500 | 0.98697700  |
| C | -2.14706000 | -2.17652800 | 0.95785100  |
| C | -0.72810900 | -3.97101900 | 0.49750900  |
| C | -2.96776000 | -3.37396900 | 1.29801200  |
| C | -1.93589500 | -4.52796500 | 1.26747300  |
| H | 0.19980700  | -4.52009900 | 0.68811700  |
| H | -0.91676100 | -3.98376400 | -0.58476600 |
| H | -3.46901600 | -3.29541400 | 2.27234700  |
| H | -3.76782500 | -3.49848400 | 0.55435500  |
| H | -2.33990800 | -5.44195600 | 0.82256400  |
| H | -1.62994800 | -4.77712900 | 2.29165500  |
| O | -7.36394800 | 1.41768900  | -0.77701000 |
| C | -8.51149500 | 1.12656900  | -0.00673900 |
| H | -8.37850700 | 1.41843300  | 1.04400300  |
| H | -9.32766400 | 1.71128600  | -0.43602500 |
| H | -8.77330000 | 0.06094400  | -0.05650500 |
| H | -0.32503300 | -2.51302600 | 2.03074400  |

## **E**

|   |             |             |             |
|---|-------------|-------------|-------------|
| C | -0.05789000 | -1.49681700 | -0.44585300 |
| C | -1.31881900 | -0.94836900 | -0.14201800 |
| N | -1.06063600 | 0.31587000  | 0.28843800  |
| C | 0.38079500  | 0.64783700  | 0.34835900  |
| C | 0.95983000  | -0.60415000 | -0.17937000 |
| C | 2.25509700  | -1.16490100 | -0.47717800 |
| C | 3.56134500  | -0.56556600 | -0.20588300 |
| C | 3.74114600  | 0.34918900  | 0.84448900  |
| C | 4.67752300  | -0.90435900 | -0.97532100 |
| C | 4.98064900  | 0.89768400  | 1.10893600  |
| H | 2.90269700  | 0.60596200  | 1.49008300  |

|    |             |             |             |
|----|-------------|-------------|-------------|
| C  | 5.93160700  | -0.36114100 | -0.72129000 |
| H  | 4.56207100  | -1.59389500 | -1.80996600 |
| C  | 6.08866500  | 0.54856300  | 0.32685600  |
| H  | 5.12714200  | 1.59974300  | 1.92604300  |
| H  | 6.77356300  | -0.64486900 | -1.34587100 |
| S  | -2.22946400 | 1.31494400  | 1.04930500  |
| O  | -1.77800600 | 1.52518200  | 2.42050300  |
| O  | -3.51628600 | 0.69074200  | 0.77830700  |
| C  | -2.07229000 | 2.82192200  | 0.15841000  |
| C  | -1.40241400 | 3.89359800  | 0.74405200  |
| C  | -2.60985600 | 2.90060200  | -1.12487200 |
| C  | -1.27685000 | 5.06987500  | 0.01986400  |
| H  | -0.99787500 | 3.80191700  | 1.74901300  |
| C  | -2.47125700 | 4.08659800  | -1.82878400 |
| H  | -3.13027800 | 2.04937300  | -1.55894700 |
| C  | -1.80917400 | 5.18552000  | -1.26872900 |
| H  | -0.76003800 | 5.91973800  | 0.46194800  |
| H  | -2.88627000 | 4.17005000  | -2.83129300 |
| C  | -1.69050600 | 6.47182400  | -2.02103400 |
| H  | -0.69843400 | 6.91937300  | -1.89571600 |
| H  | -1.87566700 | 6.33420900  | -3.09071400 |
| H  | -2.41996700 | 7.20352900  | -1.65095100 |
| H  | 0.61257100  | 1.53429300  | -0.25705300 |
| H  | 0.65550200  | 0.82525000  | 1.39772800  |
| Cu | -3.07155400 | -1.70105600 | -0.14150200 |
| N  | -4.76716700 | -2.53024300 | -0.14420500 |
| C  | -5.83171200 | -2.98154700 | -0.10407600 |
| C  | -7.15887900 | -3.54133000 | -0.05103100 |
| H  | -7.28378800 | -4.28323700 | -0.84525600 |
| H  | -7.31792200 | -4.02402100 | 0.91808000  |
| H  | -7.90104500 | -2.74781300 | -0.18003700 |

|   |             |             |             |
|---|-------------|-------------|-------------|
| C | 0.53130200  | -2.73271300 | -1.01795600 |
| C | 1.99733800  | -2.42421700 | -0.96188300 |
| C | 0.50882500  | -4.09594300 | -0.31435100 |
| C | 2.80142000  | -3.67310400 | -1.08106800 |
| C | 1.73975600  | -4.78902500 | -0.92235500 |
| H | -0.42318800 | -4.64899000 | -0.47058500 |
| H | 0.63922200  | -3.94459800 | 0.76601300  |
| H | 3.34130500  | -3.75312800 | -2.03431200 |
| H | 3.56877100  | -3.69591800 | -0.29456300 |
| H | 2.09713300  | -5.62729000 | -0.31716200 |
| H | 1.47809300  | -5.19364400 | -1.90864000 |
| O | 7.25354200  | 1.13901900  | 0.66023600  |
| C | 8.40345800  | 0.80854100  | -0.08942200 |
| H | 8.29278700  | 1.08838300  | -1.14607900 |
| H | 9.22867500  | 1.37807000  | 0.34306200  |
| H | 8.63757800  | -0.26261700 | -0.02138900 |
| H | 0.21322000  | -2.87333300 | -2.06646100 |
| O | 0.26777100  | -0.40625800 | 3.14078800  |
| H | 0.64612700  | -0.48141800 | 4.02164200  |
| H | -0.51170900 | 0.15610400  | 3.24679300  |

### TS<sub>E</sub>

Number of imaginary frequencies: 1

Lowest frequency (cm<sup>-1</sup>): -147.5

|   |             |             |             |
|---|-------------|-------------|-------------|
| C | -0.38298600 | -1.58173500 | -0.36731600 |
| C | -1.55577100 | -0.87450800 | -0.24624700 |
| N | -1.11469700 | 0.46038700  | -0.09701900 |
| C | 0.31049300  | 0.55551000  | -0.00069300 |
| C | 0.75870600  | -0.72772100 | -0.26146700 |
| C | 1.98530300  | -1.51300900 | -0.40473000 |
| C | 3.34825800  | -1.01491700 | -0.22327100 |

|    |             |             |             |
|----|-------------|-------------|-------------|
| C  | 3.61459200  | 0.12240000  | 0.55688600  |
| C  | 4.43777000  | -1.66298000 | -0.81313000 |
| C  | 4.90499000  | 0.57909200  | 0.74613700  |
| H  | 2.79626100  | 0.64986800  | 1.04500800  |
| C  | 5.74176000  | -1.21606700 | -0.63409200 |
| H  | 4.26068100  | -2.52474500 | -1.45359700 |
| C  | 5.98275200  | -0.08614500 | 0.15035600  |
| H  | 5.11369300  | 1.45535000  | 1.35514200  |
| H  | 6.55755900  | -1.74425300 | -1.11871900 |
| S  | -2.12964000 | 1.59421300  | 0.64420400  |
| O  | -1.93159600 | 1.46947700  | 2.11635600  |
| O  | -3.47197500 | 1.39835700  | 0.13138600  |
| C  | -1.46609500 | 3.13364200  | 0.13345500  |
| C  | -0.68730100 | 3.88712700  | 1.01065500  |
| C  | -1.72553500 | 3.55261100  | -1.17043000 |
| C  | -0.15946900 | 5.08625400  | 0.55937700  |
| H  | -0.50737500 | 3.54174500  | 2.02532000  |
| C  | -1.18608600 | 4.75604600  | -1.59729900 |
| H  | -2.33890100 | 2.94705800  | -1.83379000 |
| C  | -0.39898500 | 5.53726300  | -0.74431900 |
| H  | 0.44964300  | 5.69191400  | 1.22799900  |
| H  | -1.37743400 | 5.10057000  | -2.61137500 |
| C  | 0.16887400  | 6.84171600  | -1.20169400 |
| H  | 1.23459400  | 6.91782800  | -0.95800700 |
| H  | 0.05193700  | 6.97978100  | -2.28045500 |
| H  | -0.33278800 | 7.67929700  | -0.70102600 |
| H  | 0.80468500  | 1.51842700  | -0.07973900 |
| H  | 0.33943300  | -0.02310500 | 1.70385600  |
| Cu | -3.38157300 | -1.41317100 | -0.24301500 |
| N  | -5.16009800 | -2.04022400 | -0.25494800 |
| C  | -6.26392100 | -2.38635700 | -0.28131800 |

|   |             |             |             |
|---|-------------|-------------|-------------|
| C | -7.63971400 | -2.81642500 | -0.31650400 |
| H | -7.76629900 | -3.59587700 | -1.07386100 |
| H | -7.93133000 | -3.21496700 | 0.65967100  |
| H | -8.28530300 | -1.96867700 | -0.56453300 |
| C | 0.09068700  | -2.96485200 | -0.66272700 |
| C | 1.58883800  | -2.79767500 | -0.62811200 |
| C | -0.07881800 | -4.13058100 | 0.31607000  |
| C | 2.24909200  | -4.13039900 | -0.48053500 |
| C | 1.07614600  | -5.06370500 | -0.08191100 |
| H | -1.06236900 | -4.61096600 | 0.26640200  |
| H | 0.06451700  | -3.75904400 | 1.34310200  |
| H | 2.73857600  | -4.47597400 | -1.40108400 |
| H | 3.03560900  | -4.08512500 | 0.28556200  |
| H | 1.34865800  | -5.76494100 | 0.71280900  |
| H | 0.77197500  | -5.66545000 | -0.94789900 |
| O | 7.20335800  | 0.43911700  | 0.38363800  |
| C | 8.31908800  | -0.19540500 | -0.20374500 |
| H | 8.25036000  | -0.20389800 | -1.30034400 |
| H | 9.19636000  | 0.38450300  | 0.09105300  |
| H | 8.43578800  | -1.22639800 | 0.15800700  |
| H | -0.23716300 | -3.29689900 | -1.66291400 |
| O | -0.10296000 | -0.16640900 | 2.63339900  |
| H | -0.39128600 | -1.09446400 | 2.69420100  |
| H | -0.92731400 | 0.46242300  | 2.58452400  |

## F

|   |             |             |             |
|---|-------------|-------------|-------------|
| C | -0.30612600 | -1.60677100 | -0.34126000 |
| C | -1.49860600 | -0.93513200 | -0.25245300 |
| N | -1.06869000 | 0.43813800  | -0.17349800 |
| C | 0.34919000  | 0.55401800  | -0.14177800 |
| C | 0.82368500  | -0.71248900 | -0.28621700 |

|    |             |             |             |
|----|-------------|-------------|-------------|
| C  | 2.06249300  | -1.48588700 | -0.40165400 |
| C  | 3.41546100  | -0.95492600 | -0.24280100 |
| C  | 3.65931600  | 0.20414500  | 0.51191200  |
| C  | 4.51453300  | -1.59127000 | -0.82668900 |
| C  | 4.94054800  | 0.69331100  | 0.68231600  |
| H  | 2.82810700  | 0.71326300  | 0.99725900  |
| C  | 5.80955400  | -1.11091900 | -0.66667800 |
| H  | 4.35149500  | -2.47116300 | -1.44618900 |
| C  | 6.02913000  | 0.03954900  | 0.09327700  |
| H  | 5.13435400  | 1.58492100  | 1.27395100  |
| H  | 6.63405000  | -1.63027400 | -1.14623500 |
| S  | -2.03422200 | 1.53427300  | 0.62454200  |
| O  | -1.75111200 | 1.38288500  | 2.11560800  |
| O  | -3.41395200 | 1.34127600  | 0.22434500  |
| C  | -1.43350000 | 3.11632200  | 0.19188900  |
| C  | -0.60787100 | 3.83416600  | 1.05408400  |
| C  | -1.81816800 | 3.61228000  | -1.05617000 |
| C  | -0.16387700 | 5.08403400  | 0.64668400  |
| H  | -0.32676200 | 3.42924500  | 2.02188000  |
| C  | -1.35691400 | 4.85927700  | -1.43721500 |
| H  | -2.46928200 | 3.03461300  | -1.70810300 |
| C  | -0.52778100 | 5.61277400  | -0.59492900 |
| H  | 0.47470500  | 5.66690100  | 1.30691900  |
| H  | -1.64738700 | 5.26698200  | -2.40348100 |
| C  | -0.04491900 | 6.95765500  | -1.03075300 |
| H  | 0.62410700  | 6.86975600  | -1.89560000 |
| H  | -0.88190600 | 7.59405400  | -1.34052900 |
| H  | 0.49986400  | 7.47197300  | -0.23387500 |
| H  | 0.82271200  | 1.52730800  | -0.11110700 |
| H  | -1.08605400 | -1.31695700 | 1.77115800  |
| Cu | -3.32725100 | -1.45772500 | -0.31054900 |

|   |             |             |             |
|---|-------------|-------------|-------------|
| N | -5.13058700 | -2.00448800 | -0.39866600 |
| C | -6.24600900 | -2.29967300 | -0.48781000 |
| C | -7.63563600 | -2.66700700 | -0.59882200 |
| H | -7.75688300 | -3.43348100 | -1.37027100 |
| H | -7.99525700 | -3.06071800 | 0.35641800  |
| H | -8.22979300 | -1.78922500 | -0.87057800 |
| C | 0.20072800  | -2.99093500 | -0.58524200 |
| C | 1.69668900  | -2.78484600 | -0.56775000 |
| C | 0.06196000  | -4.11733700 | 0.44342200  |
| C | 2.38811900  | -4.09494800 | -0.36346100 |
| C | 1.23883800  | -5.03761500 | 0.07988300  |
| H | -0.90790800 | -4.62779100 | 0.41588700  |
| H | 0.20206900  | -3.70040600 | 1.45313100  |
| H | 2.88169600  | -4.47168600 | -1.26964800 |
| H | 3.17528900  | -3.99878700 | 0.39712100  |
| H | 1.52966400  | -5.69759600 | 0.90310100  |
| H | 0.94583000  | -5.68242400 | -0.75869400 |
| O | 7.24068900  | 0.59561500  | 0.30975500  |
| C | 8.36644400  | -0.03390100 | -0.26168300 |
| H | 8.30203000  | -0.06501200 | -1.35831600 |
| H | 9.23519800  | 0.56312900  | 0.02445000  |
| H | 8.49652800  | -1.05642500 | 0.11954400  |
| H | -0.13136100 | -3.36910300 | -1.56727200 |
| O | -1.14149100 | -0.87510100 | 2.65762700  |
| H | -1.77493600 | -1.36752500 | 3.20030000  |
| H | -1.47416400 | 0.28587600  | 2.43790700  |

### TS<sub>F</sub>

Number of imaginary frequencies: 1

Lowest frequency (cm<sup>-1</sup>): -79.7

|   |             |             |             |
|---|-------------|-------------|-------------|
| C | -0.19744400 | -1.65609700 | -0.29188600 |
|---|-------------|-------------|-------------|



|   |             |             |             |
|---|-------------|-------------|-------------|
| C | -1.42327300 | -1.04536000 | -0.14179900 |
| N | -1.06058500 | 0.34509300  | -0.04245800 |
| C | 0.33626900  | 0.52630000  | -0.05077700 |
| C | 0.88152800  | -0.70888600 | -0.24153900 |
| C | 2.15868000  | -1.41342900 | -0.39381900 |
| C | 3.48425600  | -0.81389400 | -0.25026200 |
| C | 3.67707300  | 0.35622100  | 0.50244700  |
| C | 4.60873600  | -1.39293000 | -0.84641800 |
| C | 4.93289400  | 0.91137600  | 0.65852000  |
| H | 2.82799300  | 0.82277700  | 0.99932300  |
| C | 5.87885800  | -0.84625100 | -0.70004900 |
| H | 4.48616600  | -2.28069800 | -1.46402100 |
| C | 6.04728300  | 0.31427200  | 0.05763400  |
| H | 5.08569800  | 1.81207400  | 1.24823200  |
| H | 6.72404500  | -1.32280300 | -1.18806700 |
| S | -2.07543100 | 1.39596300  | 0.79869400  |
| O | -1.73999800 | 1.27602400  | 2.24617000  |
| O | -3.44279800 | 1.08200300  | 0.41024700  |
| C | -1.58329600 | 2.98547500  | 0.25466000  |
| C | -0.96737000 | 3.86793700  | 1.13596500  |
| C | -1.84593900 | 3.32265900  | -1.07488600 |
| C | -0.60715200 | 5.12388000  | 0.66460400  |
| H | -0.78073200 | 3.57590000  | 2.16588700  |
| C | -1.47228200 | 4.57774900  | -1.51955500 |
| H | -2.32740700 | 2.61193700  | -1.74328300 |
| C | -0.84952900 | 5.49449600  | -0.66034200 |
| H | -0.12898900 | 5.83185000  | 1.33813700  |
| H | -1.66414600 | 4.86170400  | -2.55263600 |
| C | -0.44503100 | 6.83932700  | -1.17125500 |
| H | 0.34618300  | 6.74631300  | -1.92561900 |
| H | -1.28648400 | 7.34729900  | -1.65661400 |

|    |             |             |             |
|----|-------------|-------------|-------------|
| H  | -0.07171800 | 7.48363800  | -0.37001700 |
| H  | 0.76419000  | 1.51887300  | 0.02512500  |
| H  | -1.27576100 | -1.43381100 | 1.58848400  |
| Cu | -3.26212700 | -1.52274000 | -0.32449700 |
| N  | -5.08250900 | -1.98937800 | -0.52797700 |
| C  | -6.20761500 | -2.21701800 | -0.67463500 |
| C  | -7.60961900 | -2.50073800 | -0.85500200 |
| H  | -7.73934600 | -3.24942500 | -1.64229500 |
| H  | -8.03472200 | -2.88486100 | 0.07704200  |
| H  | -8.13988600 | -1.58676200 | -1.13921600 |
| C  | 0.37419700  | -3.00958800 | -0.55669800 |
| C  | 1.85851400  | -2.72697900 | -0.57225100 |
| C  | 0.31876400  | -4.14144100 | 0.47462100  |
| C  | 2.61989800  | -4.00110900 | -0.39249100 |
| C  | 1.53230300  | -5.00028300 | 0.08280700  |
| H  | -0.62369900 | -4.70156400 | 0.47098900  |
| H  | 0.46249800  | -3.71542500 | 1.47964000  |
| H  | 3.10354200  | -4.35317400 | -1.31386400 |
| H  | 3.42399600  | -3.86722200 | 0.34436000  |
| H  | 1.87720000  | -5.64078600 | 0.90054500  |
| H  | 1.25152000  | -5.66305300 | -0.74583400 |
| O  | 7.23102300  | 0.93149900  | 0.26167000  |
| C  | 8.38264100  | 0.35468500  | -0.31370700 |
| H  | 8.31673300  | 0.32162200  | -1.41018700 |
| H  | 9.22429100  | 0.99014000  | -0.02955200 |
| H  | 8.56008000  | -0.66108000 | 0.06640900  |
| H  | 0.03443500  | -3.40099300 | -1.53047300 |
| O  | -1.24160700 | -1.18668500 | 2.60257900  |
| H  | -1.91956700 | -1.68155400 | 3.09403800  |
| H  | -1.43890600 | -0.17185800 | 2.62915800  |

**G**

|   |             |             |             |
|---|-------------|-------------|-------------|
| C | 0.13245900  | 1.12781300  | -1.35024500 |
| C | -1.02070700 | 0.54752000  | -1.89062900 |
| N | -0.82233000 | -0.84393700 | -1.77080100 |
| C | 0.35061800  | -1.11398000 | -1.08856800 |
| C | 0.96595400  | 0.08502200  | -0.82961200 |
| C | 2.21955700  | 0.66445600  | -0.33156900 |
| C | 3.37276300  | -0.09416100 | 0.14695700  |
| C | 3.60032400  | -1.41768600 | -0.26662200 |
| C | 4.29936700  | 0.48353000  | 1.02030900  |
| C | 4.70635300  | -2.12191800 | 0.16653900  |
| H | 2.91529100  | -1.89112200 | -0.96745400 |
| C | 5.41679400  | -0.21264100 | 1.46620800  |
| H | 4.13036100  | 1.49747200  | 1.37898800  |
| C | 5.62607700  | -1.52578300 | 1.03810800  |
| H | 4.89168200  | -3.14213700 | -0.16016300 |
| H | 6.11029900  | 0.26786600  | 2.15046300  |
| S | -2.10895800 | -1.98114200 | -1.93945600 |
| O | -1.46682500 | -3.27623900 | -1.85534400 |
| O | -2.85449900 | -1.53454700 | -3.09802600 |
| C | -3.06367700 | -1.67663800 | -0.48129000 |
| C | -2.64291400 | -2.21677800 | 0.73325200  |
| C | -4.19558900 | -0.86778800 | -0.57163400 |
| C | -3.37191500 | -1.92513000 | 1.87780200  |
| H | -1.77168700 | -2.86668100 | 0.77867100  |
| C | -4.91124400 | -0.59474700 | 0.58627700  |
| H | -4.51488700 | -0.47781900 | -1.53582300 |
| C | -4.51263800 | -1.11646100 | 1.82174700  |
| H | -3.05982200 | -2.34371700 | 2.83285200  |
| H | -5.80340800 | 0.02682100  | 0.53293100  |
| C | -5.30939200 | -0.83808400 | 3.05669700  |

|    |             |             |             |
|----|-------------|-------------|-------------|
| H  | -5.84284900 | 0.11651500  | 2.98979700  |
| H  | -6.06988100 | -1.61514200 | 3.20726400  |
| H  | -4.68079200 | -0.83363900 | 3.95383200  |
| H  | 0.62079300  | -2.13974400 | -0.86979500 |
| H  | -1.72199200 | 0.92449600  | -2.63099100 |
| Cu | -1.77952500 | 1.14673800  | -0.07538800 |
| N  | -2.58754100 | 1.79040500  | 1.52491900  |
| C  | -2.99712000 | 2.25096900  | 2.50437700  |
| C  | -3.51053500 | 2.81742900  | 3.72620700  |
| H  | -2.79590500 | 3.54242500  | 4.12757100  |
| H  | -4.46100400 | 3.32388000  | 3.53197000  |
| H  | -3.66843600 | 2.02610100  | 4.46534300  |
| C  | 0.83896000  | 2.43617200  | -1.18054600 |
| C  | 2.13313700  | 2.00625700  | -0.52431500 |
| C  | 1.38916900  | 3.22849900  | -2.37411800 |
| C  | 3.14874000  | 3.09612500  | -0.65387600 |
| C  | 2.52313500  | 4.03307900  | -1.71909800 |
| H  | 0.64305500  | 3.85950300  | -2.86800000 |
| H  | 1.78881600  | 2.52455200  | -3.11684900 |
| H  | 3.34417400  | 3.63235800  | 0.28450000  |
| H  | 4.11157500  | 2.67689000  | -0.97596500 |
| H  | 3.25622700  | 4.39056300  | -2.44818300 |
| H  | 2.09967800  | 4.92071700  | -1.23107100 |
| O  | 6.66986400  | -2.29519500 | 1.40724600  |
| C  | 7.63482800  | -1.73371400 | 2.27069900  |
| H  | 7.19943200  | -1.46012900 | 3.24193100  |
| H  | 8.39475900  | -2.50220900 | 2.42745500  |
| H  | 8.11041700  | -0.84836000 | 1.82616800  |
| H  | 0.26940800  | 3.12783500  | -0.53610200 |

**H**

|   |             |             |             |
|---|-------------|-------------|-------------|
| C | 0.44732900  | -2.09813400 | -0.15963600 |
| C | 1.54706300  | -1.21665500 | -0.10965400 |
| N | 1.06790700  | -0.08167800 | 0.45478300  |
| C | -0.36619500 | -0.14029700 | 0.80546400  |
| C | -0.68254900 | -1.52010100 | 0.38412600  |
| C | -1.81439600 | -2.41547200 | 0.33820500  |
| C | -3.19078500 | -2.10935900 | 0.72907900  |
| C | -3.70534300 | -0.80829900 | 0.60853900  |
| C | -4.03471500 | -3.10285800 | 1.23206900  |
| C | -5.00178000 | -0.51456700 | 0.98267400  |
| H | -3.09308900 | -0.01754400 | 0.17526100  |
| C | -5.34466100 | -2.82397300 | 1.60638700  |
| H | -3.65438000 | -4.11444600 | 1.36510100  |
| C | -5.83494200 | -1.52156600 | 1.48602800  |
| H | -5.39976300 | 0.49373600  | 0.88631900  |
| H | -5.96904700 | -3.61952700 | 2.00239000  |
| S | 1.99096300  | 1.36019000  | 0.63506400  |
| O | 1.02817700  | 2.33114300  | 1.12165800  |
| O | 2.73326400  | 1.54581500  | -0.60064900 |
| C | 3.11554400  | 0.92810900  | 1.92401600  |
| C | 2.65450800  | 0.93455900  | 3.23962900  |
| C | 4.41750400  | 0.55106800  | 1.60798800  |
| C | 3.52027000  | 0.55123200  | 4.25072100  |
| H | 1.63756900  | 1.24912700  | 3.46482900  |
| C | 5.26899700  | 0.17133800  | 2.63861000  |
| H | 4.75970200  | 0.58046400  | 0.57568200  |
| C | 4.83612000  | 0.16338100  | 3.96703900  |
| H | 3.17805100  | 0.55655200  | 5.28406000  |
| H | 6.29497600  | -0.11390300 | 2.41285600  |
| C | 5.75996900  | -0.22632500 | 5.07640500  |
| H | 6.68928800  | -0.66115900 | 4.69597300  |

|    |             |             |             |
|----|-------------|-------------|-------------|
| H  | 6.02579100  | 0.64649300  | 5.68588400  |
| H  | 5.29085400  | -0.95268100 | 5.74982000  |
| H  | -0.91118300 | 0.64073400  | 0.24764600  |
| Cu | 3.33925200  | -1.42394500 | -0.73979400 |
| N  | 5.09824000  | -1.67768600 | -1.39210200 |
| C  | 6.15695700  | -1.81090800 | -1.83982900 |
| C  | 7.47440600  | -1.97434400 | -2.40081000 |
| H  | 7.63727300  | -1.22696100 | -3.18315200 |
| H  | 8.23096400  | -1.84754900 | -1.62066200 |
| H  | 7.57223300  | -2.97400700 | -2.83467900 |
| C  | 0.11630500  | -3.47809000 | -0.59196100 |
| C  | -1.34259900 | -3.56241800 | -0.25160100 |
| C  | 0.06699900  | -3.89284200 | -2.06941200 |
| C  | -1.99318700 | -4.67941900 | -0.99451700 |
| C  | -0.91957300 | -5.07153100 | -2.04007200 |
| H  | 1.04729200  | -4.15403300 | -2.48196500 |
| H  | -0.33996700 | -3.05737600 | -2.65814300 |
| H  | -2.27170600 | -5.52720800 | -0.35456500 |
| H  | -2.92575500 | -4.32334500 | -1.45396400 |
| H  | -1.34943700 | -5.28952100 | -3.02210900 |
| H  | -0.39346200 | -5.97689700 | -1.71105000 |
| O  | -7.08184600 | -1.13950400 | 1.82616300  |
| C  | -7.96367400 | -2.12248300 | 2.32532400  |
| H  | -7.59200400 | -2.56259100 | 3.26108600  |
| H  | -8.91080500 | -1.61656600 | 2.52420200  |
| H  | -8.13472400 | -2.92267800 | 1.59201400  |
| H  | 0.69028000  | -4.23455200 | -0.02892500 |
| H  | -0.52382300 | 0.04642900  | 1.87690400  |
| C  | -0.99117200 | 2.11584100  | -2.22386800 |
| C  | 0.04621400  | 3.03152300  | -2.42042300 |
| C  | 0.11952700  | 4.17020400  | -1.63044400 |

|   |             |             |             |
|---|-------------|-------------|-------------|
| C | -0.88497600 | 4.36620100  | -0.68215200 |
| C | -1.88067900 | 3.40988500  | -0.51882800 |
| N | -1.91090800 | 2.29061000  | -1.26835300 |
| H | 0.79470800  | 2.86749100  | -3.19386000 |
| H | -0.86399200 | 5.26609700  | -0.07196100 |
| C | 1.24103200  | 5.14829900  | -1.76840900 |
| H | 1.97731000  | 4.99826100  | -0.96776900 |
| H | 1.76474400  | 5.03476700  | -2.72325900 |
| H | 0.88588700  | 6.18192200  | -1.68794500 |
| C | -1.14398900 | 0.92959000  | -3.17601300 |
| C | -2.98410600 | 3.55860500  | 0.52720500  |
| C | 0.18903000  | 0.19591900  | -3.34846200 |
| H | 0.05585300  | -0.67483400 | -4.00509600 |
| H | 0.96251700  | 0.82847600  | -3.79991800 |
| H | 0.57513900  | -0.15833500 | -2.38201700 |
| C | -2.19414500 | -0.06407900 | -2.69231400 |
| H | -1.89461400 | -0.54801200 | -1.75347800 |
| H | -3.16363400 | 0.41768900  | -2.52387300 |
| H | -2.32755400 | -0.85336000 | -3.44445900 |
| C | -1.59580000 | 1.48348700  | -4.53401300 |
| H | -1.71697300 | 0.66761300  | -5.25920000 |
| H | -2.55944700 | 2.00058700  | -4.44189900 |
| H | -0.86996900 | 2.19549800  | -4.94559500 |
| C | -2.65886600 | 2.65567200  | 1.72160300  |
| H | -2.65548900 | 1.59694000  | 1.43744100  |
| H | -1.67547400 | 2.90245500  | 2.14518100  |
| H | -3.41429800 | 2.78120500  | 2.50951200  |
| C | -4.33071300 | 3.15059500  | -0.07405800 |
| H | -5.11870500 | 3.22171800  | 0.68777600  |
| H | -4.60782000 | 3.81119900  | -0.90597700 |
| H | -4.30816300 | 2.12573700  | -0.46075400 |

|   |             |            |            |
|---|-------------|------------|------------|
| C | -3.10268900 | 4.99460200 | 1.03566400 |
| H | -3.25975900 | 5.70633200 | 0.21508800 |
| H | -3.96222900 | 5.07329800 | 1.71286100 |
| H | -2.21775400 | 5.31093400 | 1.60193200 |

### **TS<sub>H</sub>**

Number of imaginary frequencies: 1

Lowest frequency (cm<sup>-1</sup>): -1175.9

|   |             |             |             |
|---|-------------|-------------|-------------|
| C | 0.28417700  | -1.96697700 | -0.34339800 |
| C | 1.40578500  | -1.15228900 | -0.23635100 |
| N | 0.92513000  | 0.00298600  | 0.33855700  |
| C | -0.50544600 | -0.01223100 | 0.58092900  |
| C | -0.84955800 | -1.34059800 | 0.19773700  |
| C | -2.00302400 | -2.23106600 | 0.09408800  |
| C | -3.39060100 | -1.91215300 | 0.43253700  |
| C | -3.88226500 | -0.60498000 | 0.30223500  |
| C | -4.27655900 | -2.89674400 | 0.87759100  |
| C | -5.19344700 | -0.29274200 | 0.60591700  |
| H | -3.21821800 | 0.17480500  | -0.06740900 |
| C | -5.60159400 | -2.60213700 | 1.18279800  |
| H | -3.91775600 | -3.91497500 | 1.01802100  |
| C | -6.06704300 | -1.29223000 | 1.05064200  |
| H | -5.57569300 | 0.72094900  | 0.50359200  |
| H | -6.25721300 | -3.39305800 | 1.53544700  |
| S | 1.95389400  | 1.26502000  | 0.82777800  |
| O | 1.06849400  | 2.29821800  | 1.34349000  |
| O | 2.87310000  | 1.53235400  | -0.26931000 |
| C | 2.85839300  | 0.54639400  | 2.16457800  |
| C | 2.25262200  | 0.46966800  | 3.41699300  |
| C | 4.13268100  | 0.03327500  | 1.94085100  |
| C | 2.94251000  | -0.13317300 | 4.45692800  |



|    |             |             |             |
|----|-------------|-------------|-------------|
| H  | 1.25915700  | 0.88578000  | 3.57324700  |
| C  | 4.80673100  | -0.56697400 | 2.99703800  |
| H  | 4.59160200  | 0.12116900  | 0.95776600  |
| C  | 4.22546300  | -0.65983500 | 4.26434600  |
| H  | 2.48352400  | -0.19756900 | 5.44202700  |
| H  | 5.80704700  | -0.96731500 | 2.84096300  |
| C  | 4.96185200  | -1.28368400 | 5.40694800  |
| H  | 5.82216900  | -1.86752800 | 5.06540400  |
| H  | 5.33633400  | -0.51515100 | 6.09512700  |
| H  | 4.30952000  | -1.94245800 | 5.99100200  |
| H  | -1.06277200 | 1.07241800  | -0.27962200 |
| Cu | 3.20426600  | -1.39046200 | -0.82718000 |
| N  | 4.97194000  | -1.67291300 | -1.44812000 |
| C  | 6.04229800  | -1.82080700 | -1.86262700 |
| C  | 7.37463600  | -2.00172200 | -2.38307700 |
| H  | 7.56917600  | -1.26176700 | -3.16508200 |
| H  | 8.10920700  | -1.87692600 | -1.58196500 |
| H  | 7.47563000  | -3.00526800 | -2.80705000 |
| C  | -0.07965100 | -3.33358900 | -0.80002100 |
| C  | -1.54740700 | -3.38154800 | -0.48263900 |
| C  | -0.11427200 | -3.73463900 | -2.27993200 |
| C  | -2.20454800 | -4.49591000 | -1.22881300 |
| C  | -1.13433500 | -4.88589400 | -2.28227400 |
| H  | 0.86485700  | -4.02272500 | -2.67922000 |
| H  | -0.48362000 | -2.88317700 | -2.87084500 |
| H  | -2.47096200 | -5.35010600 | -0.59172000 |
| H  | -3.14269100 | -4.14767400 | -1.68227000 |
| H  | -1.56640700 | -5.06870500 | -3.27108700 |
| H  | -0.63392400 | -5.81355400 | -1.97571300 |
| O  | -7.32667200 | -0.89433400 | 1.32785800  |
| C  | -8.24304000 | -1.86843400 | 1.77786300  |

|   |             |             |             |
|---|-------------|-------------|-------------|
| H | -7.91872200 | -2.32474800 | 2.72348700  |
| H | -9.19083100 | -1.35107500 | 1.94179500  |
| H | -8.39457000 | -2.65897900 | 1.02970300  |
| H | 0.46599700  | -4.11145900 | -0.23760100 |
| H | -0.81404000 | 0.41262100  | 1.53482900  |
| C | -0.40153100 | 2.22180300  | -2.04320900 |
| C | 0.42768600  | 3.30541600  | -2.30594700 |
| C | 0.44642500  | 4.40432700  | -1.45933500 |
| C | -0.48591500 | 4.42758000  | -0.42099000 |
| C | -1.27875200 | 3.32714000  | -0.14914800 |
| N | -1.14580200 | 2.19501400  | -0.90753800 |
| H | 1.05831700  | 3.29843300  | -3.19173400 |
| H | -0.56778800 | 5.32264400  | 0.18656600  |
| C | 1.39469500  | 5.53572400  | -1.66380300 |
| H | 2.22651600  | 5.45313800  | -0.95214600 |
| H | 1.81913100  | 5.53558600  | -2.67222300 |
| H | 0.91319500  | 6.50303900  | -1.48359400 |
| C | -0.55719900 | 1.13303600  | -3.10423600 |
| C | -2.42502600 | 3.40959000  | 0.86217500  |
| C | 0.75751000  | 0.38180000  | -3.32519900 |
| H | 0.64657500  | -0.31862900 | -4.16366200 |
| H | 1.58154000  | 1.06426300  | -3.56687700 |
| H | 1.04798800  | -0.19475800 | -2.43872000 |
| C | -1.67927300 | 0.14869300  | -2.78638600 |
| H | -1.46255500 | -0.46829600 | -1.91127100 |
| H | -2.63473100 | 0.66362900  | -2.62283400 |
| H | -1.81280700 | -0.52919000 | -3.63873600 |
| C | -0.94817200 | 1.84031500  | -4.41513200 |
| H | -1.14430000 | 1.08374700  | -5.18517300 |
| H | -1.86067700 | 2.43657200  | -4.29043200 |
| H | -0.15999600 | 2.49854600  | -4.79641000 |

|   |             |            |             |
|---|-------------|------------|-------------|
| C | -2.37686200 | 2.34420100 | 1.95811100  |
| H | -2.57497600 | 1.33834400 | 1.57888300  |
| H | -1.41232500 | 2.35441000 | 2.48130500  |
| H | -3.16193400 | 2.55559700 | 2.69436100  |
| C | -3.72993400 | 3.26451200 | 0.06379100  |
| H | -4.58982000 | 3.32975500 | 0.74305600  |
| H | -3.82774900 | 4.06462600 | -0.68112900 |
| H | -3.78238200 | 2.30668200 | -0.46814500 |
| C | -2.45203400 | 4.77034200 | 1.56004300  |
| H | -2.57261500 | 5.60022300 | 0.85385400  |
| H | -3.30833600 | 4.80125600 | 2.24339300  |
| H | -1.54719100 | 4.94364900 | 2.15629700  |

## I

|   |             |             |             |
|---|-------------|-------------|-------------|
| C | 0.52195200  | -2.04145800 | -0.17660500 |
| C | 1.56869600  | -1.15602400 | -0.22564100 |
| N | 0.99216000  | 0.03201500  | 0.28339900  |
| C | -0.34397500 | -0.14068400 | 0.69588400  |
| C | -0.65066300 | -1.43770300 | 0.39021300  |
| C | -1.75079300 | -2.41226300 | 0.37987500  |
| C | -3.14101100 | -2.12872400 | 0.73250700  |
| C | -3.62540100 | -0.81070700 | 0.77437800  |
| C | -4.04516500 | -3.14987100 | 1.04339900  |
| C | -4.94018300 | -0.52956500 | 1.09732400  |
| H | -2.94524500 | 0.00663200  | 0.53267100  |
| C | -5.37361500 | -2.88694300 | 1.36041600  |
| H | -3.69617200 | -4.18010100 | 1.06550000  |
| C | -5.83180600 | -1.56869000 | 1.38638000  |
| H | -5.30959800 | 0.49393200  | 1.14195600  |
| H | -6.03636200 | -3.71323400 | 1.60112900  |
| S | 1.88952800  | 1.41435800  | 0.60889600  |

|    |             |             |             |
|----|-------------|-------------|-------------|
| O  | 0.94263200  | 2.38556700  | 1.15006800  |
| O  | 2.66940400  | 1.75019200  | -0.57834800 |
| C  | 3.00930600  | 0.91204300  | 1.88319000  |
| C  | 2.50615600  | 0.67329500  | 3.15896200  |
| C  | 4.35745000  | 0.73029500  | 1.58728900  |
| C  | 3.37503100  | 0.24519000  | 4.15173300  |
| H  | 1.44846000  | 0.81926700  | 3.36901300  |
| C  | 5.21105900  | 0.30354900  | 2.59592800  |
| H  | 4.72517100  | 0.93274800  | 0.58382400  |
| C  | 4.73563800  | 0.05496700  | 3.88731100  |
| H  | 2.99500200  | 0.05391000  | 5.15367900  |
| H  | 6.26961500  | 0.16139100  | 2.38281100  |
| C  | 5.67129200  | -0.37881600 | 4.97145000  |
| H  | 6.45792200  | -1.03609200 | 4.58541200  |
| H  | 6.16916200  | 0.48705200  | 5.42695300  |
| H  | 5.14426900  | -0.90828000 | 5.77176000  |
| H  | -2.69053900 | 1.74432700  | -1.20879400 |
| Cu | 3.36934800  | -1.31981100 | -0.80094800 |
| N  | 5.14976100  | -1.55875700 | -1.39932400 |
| C  | 6.22777900  | -1.71267500 | -1.79183700 |
| C  | 7.56964900  | -1.90227800 | -2.28612500 |
| H  | 7.78675300  | -1.16361300 | -3.06331000 |
| H  | 8.28967700  | -1.78573900 | -1.47072100 |
| H  | 7.67159900  | -2.90588800 | -2.70974600 |
| C  | 0.21706900  | -3.46861200 | -0.48720200 |
| C  | -1.24651000 | -3.57057700 | -0.12415200 |
| C  | 0.18156300  | -4.01955500 | -1.91537100 |
| C  | -1.84675600 | -4.78479100 | -0.76311900 |
| C  | -0.75795800 | -5.22629500 | -1.77480200 |
| H  | 1.16777400  | -4.28177200 | -2.31628300 |
| H  | -0.26225400 | -3.25932800 | -2.57665700 |

|   |             |             |             |
|---|-------------|-------------|-------------|
| H | -2.07912800 | -5.58942600 | -0.05122700 |
| H | -2.79522000 | -4.53019500 | -1.25781100 |
| H | -1.17844700 | -5.55847800 | -2.72978500 |
| H | -0.19466000 | -6.07378000 | -1.36192700 |
| O | -7.09716100 | -1.19740400 | 1.68216300  |
| C | -8.03440600 | -2.21477000 | 1.95829000  |
| H | -7.75742600 | -2.79189100 | 2.85153900  |
| H | -8.98895800 | -1.71656600 | 2.14212900  |
| H | -8.14963600 | -2.90238200 | 1.10871300  |
| H | 0.81620200  | -4.16006800 | 0.13246700  |
| H | -0.88112500 | 0.68180300  | 1.14936900  |
| C | -0.93429700 | 2.06138900  | -2.17736600 |
| C | 0.16740300  | 2.89394900  | -2.23884900 |
| C | 0.26181800  | 4.01473200  | -1.41453500 |
| C | -0.79243700 | 4.29876600  | -0.54090700 |
| C | -1.88124800 | 3.45895900  | -0.45407000 |
| N | -1.89136700 | 2.37140100  | -1.26952500 |
| H | 0.97118000  | 2.67124700  | -2.93401600 |
| H | -0.73480600 | 5.17389700  | 0.09894400  |
| C | 1.48366700  | 4.86139400  | -1.42493800 |
| H | 2.18382200  | 4.46382700  | -0.67789100 |
| H | 1.99186600  | 4.83346800  | -2.39329500 |
| H | 1.26503200  | 5.90038900  | -1.16029200 |
| C | -1.17471400 | 0.91157400  | -3.13880000 |
| C | -3.03337600 | 3.63127000  | 0.51873000  |
| C | 0.10906600  | 0.10049800  | -3.32646600 |
| H | -0.07554100 | -0.69187900 | -4.06244400 |
| H | 0.93978400  | 0.70592700  | -3.70681700 |
| H | 0.43107400  | -0.37307600 | -2.38949400 |
| C | -2.27916100 | -0.02975000 | -2.66123900 |
| H | -2.03216300 | -0.48238500 | -1.69250100 |

|   |             |             |             |
|---|-------------|-------------|-------------|
| H | -3.26847900 | 0.44976000  | -2.60205400 |
| H | -2.38592600 | -0.84536000 | -3.38478100 |
| C | -1.59509300 | 1.54038100  | -4.47659300 |
| H | -1.79509900 | 0.74659600  | -5.20651700 |
| H | -2.50899600 | 2.13883900  | -4.36953400 |
| H | -0.80978800 | 2.18674100  | -4.88633000 |
| C | -2.70550600 | 2.83725800  | 1.79106500  |
| H | -2.68083100 | 1.75621100  | 1.60470400  |
| H | -1.73401600 | 3.13402300  | 2.20580200  |
| H | -3.47797700 | 3.02075700  | 2.54813600  |
| C | -4.34866600 | 3.12881400  | -0.08420600 |
| H | -5.16007300 | 3.30653000  | 0.63079000  |
| H | -4.59964100 | 3.65583400  | -1.01311000 |
| H | -4.35644600 | 2.04735000  | -0.28449200 |
| C | -3.20345100 | 5.10580300  | 0.88523800  |
| H | -3.33761400 | 5.73552100  | -0.00259900 |
| H | -4.09376700 | 5.21675700  | 1.51405600  |
| H | -2.35526900 | 5.48987600  | 1.46290100  |

### TS<sub>i</sub>

Number of imaginary frequencies: 1

Lowest frequency (cm<sup>-1</sup>): -863.2

|   |             |             |             |
|---|-------------|-------------|-------------|
| C | -0.66020400 | -0.55935200 | 1.19101300  |
| C | 0.52357700  | -0.18040400 | 0.56497200  |
| N | 0.04244600  | 0.53674800  | -0.58657300 |
| C | -1.34269700 | 0.60115800  | -0.61784900 |
| C | -1.79897200 | -0.09433600 | 0.47164100  |
| C | -3.02825100 | -0.57249300 | 1.11096400  |
| C | -4.37401300 | -0.46938700 | 0.55065200  |
| C | -4.57890900 | -0.40492700 | -0.83789700 |
| C | -5.50208800 | -0.46444100 | 1.37509400  |

|    |             |             |             |
|----|-------------|-------------|-------------|
| C  | -5.85242000 | -0.34428300 | -1.37089700 |
| H  | -3.72036800 | -0.43713400 | -1.50867200 |
| C  | -6.78995900 | -0.40339900 | 0.85399900  |
| H  | -5.36925900 | -0.48397100 | 2.45535000  |
| C  | -6.97097700 | -0.34289400 | -0.52887300 |
| H  | -6.01642900 | -0.30443400 | -2.44506600 |
| H  | -7.64001300 | -0.39434400 | 1.52984300  |
| S  | 0.99781000  | 1.59764300  | -1.52066200 |
| O  | 0.59904900  | 1.42816700  | -2.90735000 |
| O  | 2.37381100  | 1.34417600  | -1.10238700 |
| C  | 0.48793000  | 3.20377500  | -0.97952300 |
| C  | -0.31247900 | 3.97449900  | -1.81929700 |
| C  | 0.87683100  | 3.66420500  | 0.27602500  |
| C  | -0.72680500 | 5.22515400  | -1.38590500 |
| H  | -0.59539700 | 3.59823900  | -2.79885400 |
| C  | 0.44730300  | 4.91605000  | 0.69156100  |
| H  | 1.50976900  | 3.05422700  | 0.92001900  |
| C  | -0.35891200 | 5.71255900  | -0.12766200 |
| H  | -1.34781100 | 5.84024900  | -2.03498500 |
| H  | 0.74490000  | 5.29004000  | 1.66966700  |
| C  | -0.83445700 | 7.05458300  | 0.33020200  |
| H  | -0.69613500 | 7.81340800  | -0.44819300 |
| H  | -1.90649500 | 7.02935600  | 0.56286500  |
| H  | -0.30758500 | 7.38641600  | 1.23018200  |
| H  | 1.29325900  | -1.32631800 | 0.05576500  |
| Cu | 2.13924800  | 0.56111900  | 1.35846400  |
| N  | 3.52511800  | 1.50055900  | 2.25844900  |
| C  | 4.31781100  | 2.14868600  | 2.79900100  |
| C  | 5.30873900  | 2.94880400  | 3.47508400  |
| H  | 4.82376100  | 3.78154200  | 3.99320800  |
| H  | 5.84350000  | 2.33678700  | 4.20754400  |

|   |              |             |             |
|---|--------------|-------------|-------------|
| H | 6.02419000   | 3.34709200  | 2.74947500  |
| C | -1.14398500  | -1.27894000 | 2.41078600  |
| C | -2.64743800  | -1.22402400 | 2.23860200  |
| C | -0.95561900  | -2.78156100 | 2.65979800  |
| C | -3.30754200  | -2.22475700 | 3.13071200  |
| C | -2.12617400  | -3.10909500 | 3.60078900  |
| H | 0.01624900   | -3.04067100 | 3.09380100  |
| H | -1.06223100  | -3.32195500 | 1.70752700  |
| H | -3.83013300  | -1.77172100 | 3.98446900  |
| H | -4.06610600  | -2.79216700 | 2.57340700  |
| H | -2.37288000  | -4.17544300 | 3.60782900  |
| H | -1.84814700  | -2.83966800 | 4.62828900  |
| O | -8.17185600  | -0.27913600 | -1.14387800 |
| C | -9.32794500  | -0.29252500 | -0.33631100 |
| H | -9.36543900  | 0.57739300  | 0.33445400  |
| H | -10.18209400 | -0.25208800 | -1.01583100 |
| H | -9.39334900  | -1.21125100 | 0.26335400  |
| H | -0.82755200  | -0.73681600 | 3.31995400  |
| C | 3.37785200   | -1.89685900 | -0.30692500 |
| C | 4.34042100   | -1.47656000 | -1.20674100 |
| C | 3.99165300   | -1.19781100 | -2.53240900 |
| C | 2.70176500   | -1.52294700 | -2.94225500 |
| C | 1.75756600   | -1.95487400 | -2.01924700 |
| N | 2.07985400   | -2.00043800 | -0.70254300 |
| H | 5.37807600   | -1.38223600 | -0.89463600 |
| H | 2.43448200   | -1.44378000 | -3.99382200 |
| C | 4.97736200   | -0.60542100 | -3.47933100 |
| H | 4.77674400   | -0.89848900 | -4.51451000 |
| H | 4.90937100   | 0.48981700  | -3.43259200 |
| H | 6.00614600   | -0.88030400 | -3.22507000 |
| C | 3.75198800   | -2.47876200 | 1.05511900  |



|   |             |             |             |
|---|-------------|-------------|-------------|
| C | 0.43601600  | -2.56783800 | -2.47708800 |
| C | 2.58777800  | -2.55357500 | 2.04160700  |
| H | 2.89855500  | -3.14427500 | 2.91251300  |
| H | 2.26526200  | -1.57201300 | 2.41715500  |
| H | 1.71695200  | -3.05043000 | 1.59829900  |
| C | 4.17023600  | -3.92883800 | 0.74216200  |
| H | 3.34364500  | -4.48587700 | 0.28170700  |
| H | 5.02718900  | -3.96408300 | 0.05913100  |
| H | 4.45259700  | -4.44262300 | 1.67010700  |
| C | 4.93067200  | -1.75557600 | 1.70287700  |
| H | 5.14155100  | -2.20803100 | 2.67965900  |
| H | 5.84899500  | -1.83382300 | 1.11004800  |
| H | 4.71857200  | -0.69151400 | 1.86183300  |
| C | -0.46092400 | -2.98876300 | -1.31680400 |
| H | 0.06720400  | -3.65005200 | -0.61724900 |
| H | -0.85715400 | -2.13395600 | -0.76014100 |
| H | -1.32001600 | -3.54224800 | -1.71478600 |
| C | 0.84426000  | -3.84978400 | -3.22938900 |
| H | -0.05768900 | -4.39278200 | -3.53899000 |
| H | 1.43170600  | -3.63336900 | -4.12910500 |
| H | 1.43648100  | -4.51502600 | -2.58686000 |
| C | -0.34969300 | -1.66454600 | -3.42625800 |
| H | 0.23770700  | -1.35848400 | -4.29955400 |
| H | -1.22893200 | -2.20846000 | -3.79377500 |
| H | -0.69384700 | -0.75387500 | -2.92547000 |
| H | -1.86071600 | 1.12767500  | -1.41255300 |

## 2a

|   |             |             |             |
|---|-------------|-------------|-------------|
| C | -2.89584700 | -2.59628800 | -0.57211300 |
| C | -3.28315100 | -2.01712600 | -1.91602500 |
| C | -4.26784700 | -3.08919500 | -2.39678300 |

|   |             |             |             |
|---|-------------|-------------|-------------|
| C | -5.08223600 | -3.37704300 | -1.12619500 |
| C | -4.07629900 | -3.27349100 | 0.04983300  |
| H | -4.88934800 | -2.77552600 | -3.24287600 |
| H | -5.86120200 | -2.61094500 | -1.01388500 |
| H | -4.50811300 | -2.71737200 | 0.89394500  |
| C | -1.95199000 | -1.79150300 | -2.55121500 |
| C | -1.35663900 | -1.31910100 | -3.67882600 |
| N | 0.02224300  | -1.43195500 | -3.47752200 |
| C | 0.28878600  | -1.90961400 | -2.18943400 |
| C | -0.92615000 | -2.15712200 | -1.61526300 |
| C | -1.55210800 | -2.69611900 | -0.40148800 |
| C | -0.84418200 | -3.31909800 | 0.71630300  |
| C | 0.42220100  | -3.90087100 | 0.53995500  |
| C | -1.40794600 | -3.37498700 | 1.99450700  |
| C | 1.08215000  | -4.51688200 | 1.58663200  |
| H | 0.88154500  | -3.89400600 | -0.44658300 |
| C | -0.75678200 | -3.99155600 | 3.05822100  |
| H | -2.37203500 | -2.90115800 | 2.17091000  |
| C | 0.49739100  | -4.56943400 | 2.85664500  |
| H | 2.05861000  | -4.97525200 | 1.44801900  |
| H | -1.22923100 | -4.00517100 | 4.03634700  |
| S | 1.17269000  | -0.62680900 | -4.42931200 |
| O | 2.44242200  | -1.26887000 | -4.13891200 |
| O | 0.61224600  | -0.58704700 | -5.76864200 |
| C | 1.19002800  | 1.01239200  | -3.76536200 |
| C | 2.08020500  | 1.32660600  | -2.74243100 |
| C | 0.28460200  | 1.94867100  | -4.25566100 |
| C | 2.05586400  | 2.60616800  | -2.20654700 |
| H | 2.79070400  | 0.58417600  | -2.38729300 |
| C | 0.27655900  | 3.22263600  | -3.70578200 |
| H | -0.38747600 | 1.68332300  | -5.06838800 |

|   |             |             |             |
|---|-------------|-------------|-------------|
| C | 1.15436800  | 3.56788200  | -2.67381000 |
| H | 2.75193200  | 2.86957000  | -1.41192900 |
| H | -0.41950800 | 3.96822600  | -4.08641500 |
| C | 1.11870100  | 4.93489900  | -2.06584500 |
| H | 2.11665800  | 5.26455800  | -1.75719900 |
| H | 0.48412300  | 4.94652600  | -1.17005900 |
| H | 0.71232100  | 5.67566500  | -2.76231800 |
| H | -1.73469200 | -0.95163400 | -4.62362300 |
| H | 1.31224100  | -2.03385800 | -1.86180000 |
| H | -3.78956300 | -4.25796100 | 0.44549500  |
| H | -5.59170600 | -4.34570900 | -1.16049600 |
| H | -3.70205600 | -3.97998200 | -2.70390800 |
| O | 1.22061600  | -5.19137100 | 3.81713700  |
| C | 0.66028200  | -5.28554100 | 5.10562200  |
| H | -0.28871200 | -5.84058300 | 5.09893200  |
| H | 1.38173300  | -5.82981900 | 5.71965700  |
| H | 0.49255600  | -4.29509700 | 5.55265000  |
| H | -3.83509600 | -1.06960000 | -1.78928800 |

## **A1**

|   |             |             |             |
|---|-------------|-------------|-------------|
| C | 3.03307400  | 2.25510800  | 0.27444600  |
| C | 2.20307400  | 1.37170700  | 0.18998200  |
| N | 1.28063700  | 0.39331800  | 0.08185600  |
| C | 0.40537200  | 0.35331000  | -1.11023100 |
| C | -1.02169300 | 0.31418400  | -0.77203700 |
| C | -2.25456500 | 0.42802700  | -0.79694100 |
| C | -3.65250500 | 0.69884800  | -0.86616600 |
| C | -4.59488600 | -0.34584900 | -0.92962000 |
| C | -4.10488400 | 2.02515100  | -0.88443100 |
| C | -5.94087400 | -0.06576400 | -1.00899200 |
| H | -4.25222500 | -1.37914600 | -0.92049500 |

|   |             |             |             |
|---|-------------|-------------|-------------|
| C | -5.45799800 | 2.31282500  | -0.96864400 |
| H | -3.38216300 | 2.83618500  | -0.83359200 |
| C | -6.38544400 | 1.26589500  | -1.02956500 |
| H | -6.68389600 | -0.85696700 | -1.06310400 |
| H | -5.78166400 | 3.34858200  | -0.98555500 |
| S | 1.66225400  | -1.10011700 | 0.83180100  |
| O | 0.39998500  | -1.85892900 | 0.77696100  |
| O | 2.27216500  | -0.77462600 | 2.10149100  |
| C | 2.81628500  | -1.89692300 | -0.22870600 |
| C | 2.36988200  | -2.81981800 | -1.17377200 |
| C | 4.16148100  | -1.53427600 | -0.13332500 |
| C | 3.29820500  | -3.39158800 | -2.03235700 |
| H | 1.32084800  | -3.10144500 | -1.21628600 |
| C | 5.06657900  | -2.11751000 | -1.00444000 |
| H | 4.48949100  | -0.81764400 | 0.61542100  |
| C | 4.65232100  | -3.05213500 | -1.96202900 |
| H | 2.96887100  | -4.12136700 | -2.76936900 |
| H | 6.11999600  | -1.85064700 | -0.94194000 |
| C | 5.65105800  | -3.69018500 | -2.87296400 |
| H | 6.35557600  | -2.95317600 | -3.27401900 |
| H | 6.24539500  | -4.43789100 | -2.33260800 |
| H | 5.16645300  | -4.19758200 | -3.71260100 |
| H | 0.62053300  | 1.25912000  | -1.68646500 |
| H | 0.67292500  | -0.50149900 | -1.74953700 |
| C | 3.98423000  | 3.28982000  | 0.44462400  |
| C | 4.65240300  | 3.92243300  | -0.53653900 |
| C | 4.30298400  | 3.89255100  | 1.79698200  |
| C | 5.50142700  | 5.03125900  | 0.00025800  |
| H | 4.55035200  | 3.69585500  | -1.59506100 |
| C | 5.55689100  | 4.72851900  | 1.50669100  |
| H | 4.45886200  | 3.13244400  | 2.57154700  |

|    |             |             |             |
|----|-------------|-------------|-------------|
| H  | 3.45744800  | 4.51213100  | 2.13154800  |
| H  | 6.49372700  | 5.07609200  | -0.46546300 |
| H  | 5.02463400  | 6.00325300  | -0.20511700 |
| H  | 5.61957000  | 5.63076600  | 2.12274900  |
| H  | 6.44898800  | 4.12645000  | 1.71927100  |
| O  | -7.71273100 | 1.43314300  | -1.10822600 |
| C  | -8.22702300 | 2.75243200  | -1.15138600 |
| H  | -9.31125400 | 2.65489900  | -1.22771000 |
| H  | -7.98085000 | 3.31020000  | -0.23835700 |
| H  | -7.85453400 | 3.29904100  | -2.02729000 |
| Cu | -1.60074400 | -1.00925800 | 0.63522600  |
| N  | -2.55013100 | -2.13217500 | 1.88830700  |
| C  | -3.05016900 | -2.80899600 | 2.68193600  |
| C  | -3.67153500 | -3.65391200 | 3.67089600  |
| H  | -3.52396400 | -3.22665200 | 4.66735700  |
| H  | -4.74423200 | -3.73421400 | 3.47144100  |
| H  | -3.22440200 | -4.65182500 | 3.63991200  |

### TS<sub>A1</sub>

Number of imaginary frequencies: 1

Lowest frequency (cm<sup>-1</sup>): -468.6

|   |             |             |             |
|---|-------------|-------------|-------------|
| C | -0.31016200 | 0.25946100  | 0.96929900  |
| C | -1.51532600 | 0.74624700  | 0.89249800  |
| N | -2.01176300 | 1.14286900  | -0.31505100 |
| C | -1.20226200 | 0.58512700  | -1.43738800 |
| C | 0.11823900  | 0.31472700  | -0.82475600 |
| C | 1.33109400  | 0.06923600  | -1.18143800 |
| C | 2.53890600  | -0.63852600 | -1.15163600 |
| C | 2.53036100  | -2.00004900 | -0.76812000 |
| C | 3.77948400  | -0.02190300 | -1.45159500 |
| C | 3.70473500  | -2.71915700 | -0.67839700 |

|   |             |             |             |
|---|-------------|-------------|-------------|
| H | 1.57982500  | -2.47525900 | -0.53601600 |
| C | 4.94841400  | -0.73348800 | -1.36555700 |
| H | 3.79518900  | 1.02071300  | -1.76394500 |
| C | 4.92528600  | -2.08921700 | -0.97784500 |
| H | 3.67287000  | -3.76253900 | -0.38143200 |
| H | 5.91011000  | -0.28256300 | -1.59409600 |
| S | -3.69726900 | 1.27506100  | -0.54544000 |
| O | -3.83328500 | 1.59963600  | -1.95751700 |
| O | -4.17384300 | 2.15831400  | 0.50015600  |
| C | -4.32019100 | -0.35507500 | -0.26669200 |
| C | -4.60006100 | -1.17232100 | -1.35782400 |
| C | -4.49398200 | -0.80352600 | 1.04311700  |
| C | -5.06429700 | -2.46183200 | -1.12796300 |
| H | -4.47739100 | -0.78916500 | -2.36798700 |
| C | -4.95263900 | -2.09479200 | 1.24870200  |
| H | -4.28244500 | -0.14538300 | 1.88193800  |
| C | -5.24749000 | -2.93970000 | 0.17142600  |
| H | -5.30009800 | -3.10742500 | -1.97211100 |
| H | -5.09770600 | -2.45886600 | 2.26464300  |
| C | -5.77836300 | -4.31642600 | 0.41773200  |
| H | -5.74076700 | -4.93346400 | -0.48544200 |
| H | -5.21736100 | -4.82749900 | 1.20845400  |
| H | -6.82460300 | -4.27589900 | 0.74639600  |
| H | -1.63571300 | -0.37093100 | -1.77759800 |
| H | -1.15770700 | 1.26652900  | -2.29181500 |
| C | 0.74941200  | -0.24903700 | 1.80266700  |
| C | 0.81524800  | -1.49513300 | 2.30112800  |
| C | 1.94395300  | 0.56625300  | 2.24152400  |
| C | 2.03545200  | -1.69689900 | 3.14196700  |
| H | 0.04698700  | -2.25116100 | 2.15315500  |
| C | 2.92005500  | -0.49662100 | 2.76204300  |

|    |            |             |             |
|----|------------|-------------|-------------|
| H  | 1.63668500 | 1.28146900  | 3.02005600  |
| H  | 2.37598400 | 1.17029800  | 1.42552100  |
| H  | 1.76708600 | -1.68975100 | 4.20959600  |
| H  | 2.52271800 | -2.66315700 | 2.95663200  |
| H  | 3.59149800 | -0.79557400 | 1.94481000  |
| H  | 3.54495400 | -0.14334100 | 3.58751700  |
| O  | 6.11175000 | -2.68858300 | -0.92524600 |
| C  | 6.17844700 | -4.05796500 | -0.54859200 |
| H  | 7.23509200 | -4.32676200 | -0.57293500 |
| H  | 5.79096700 | -4.20889100 | 0.46645000  |
| H  | 5.62797000 | -4.68985000 | -1.25605900 |
| Cu | 1.21305900 | 2.05024400  | -0.50860500 |
| N  | 1.57807300 | 3.83341900  | 0.01684700  |
| C  | 1.68761300 | 4.92032700  | 0.39809100  |
| C  | 1.82046000 | 6.27234300  | 0.87515900  |
| H  | 2.63175300 | 6.77767500  | 0.34278000  |
| H  | 0.88550600 | 6.81477800  | 0.70418400  |
| H  | 2.04074700 | 6.26667400  | 1.94687500  |

## **B1**

|   |             |             |             |
|---|-------------|-------------|-------------|
| C | -0.21619200 | -1.25470000 | -0.17461900 |
| C | -1.56189000 | -1.49935700 | 0.35552400  |
| N | -1.82820200 | -0.37042300 | 0.99493900  |
| C | -0.80386400 | 0.68823700  | 0.97913300  |
| C | 0.29760800  | -0.02339800 | 0.25069400  |
| C | 1.64636700  | 0.37650600  | 0.15243100  |
| C | 2.08128500  | 1.71412400  | -0.03244300 |
| C | 1.24601300  | 2.75144200  | -0.53576800 |
| C | 3.43005300  | 2.04963300  | 0.24624600  |
| C | 1.72137000  | 4.02152900  | -0.72352200 |
| H | 0.21967200  | 2.52265900  | -0.81174000 |

|   |             |             |             |
|---|-------------|-------------|-------------|
| C | 3.91876100  | 3.32710400  | 0.08647900  |
| H | 4.08495000  | 1.26446500  | 0.62275700  |
| C | 3.06120500  | 4.32852600  | -0.40368600 |
| H | 1.09569900  | 4.81619800  | -1.12058700 |
| H | 4.95214300  | 3.55094000  | 0.33195300  |
| S | -3.30245300 | -0.15300400 | 1.91818400  |
| O | -3.06032000 | 1.07012200  | 2.66725300  |
| O | -3.57961000 | -1.41475800 | 2.57088300  |
| C | -4.48812700 | 0.14724200  | 0.65136100  |
| C | -4.77072300 | 1.46273300  | 0.29371300  |
| C | -5.09492100 | -0.93485200 | 0.01663900  |
| C | -5.68909400 | 1.69309600  | -0.72115300 |
| H | -4.28975800 | 2.28654200  | 0.81616500  |
| C | -6.00599600 | -0.67967000 | -0.99605800 |
| H | -4.85457300 | -1.95170400 | 0.31642000  |
| C | -6.31767000 | 0.63111700  | -1.37750400 |
| H | -5.92957500 | 2.71537300  | -1.00754000 |
| H | -6.49351200 | -1.51083900 | -1.50264200 |
| C | -7.32681500 | 0.88373600  | -2.45208900 |
| H | -7.24342600 | 0.14987100  | -3.26103500 |
| H | -8.34601500 | 0.80568700  | -2.05236800 |
| H | -7.21885400 | 1.88482100  | -2.88136900 |
| H | -1.17538100 | 1.57273800  | 0.44306300  |
| H | -0.54892200 | 1.00025300  | 1.99836300  |
| C | 0.50224300  | -2.18298100 | -0.98466600 |
| C | 1.54663100  | -1.86957200 | -1.81361000 |
| C | 0.27876500  | -3.67282300 | -0.96796500 |
| C | 2.13889400  | -3.09816400 | -2.44186500 |
| H | 1.76652300  | -0.85982700 | -2.15566500 |
| C | 1.06002500  | -4.16774800 | -2.19169800 |
| H | -0.78548300 | -3.93021200 | -0.98101000 |



|    |            |             |             |
|----|------------|-------------|-------------|
| H  | 0.68154900 | -4.08332000 | -0.02783500 |
| H  | 2.36727300 | -2.95659800 | -3.50441700 |
| H  | 3.09114800 | -3.35982700 | -1.95357700 |
| H  | 1.47513700 | -5.17140900 | -2.05960900 |
| H  | 0.38852600 | -4.20550100 | -3.05809400 |
| O  | 3.42194700 | 5.58916900  | -0.60783800 |
| C  | 4.75659100 | 5.98600700  | -0.31273300 |
| H  | 4.81399200 | 7.04830400  | -0.55297200 |
| H  | 4.98465100 | 5.84096600  | 0.75003600  |
| H  | 5.47726800 | 5.43535500  | -0.92907800 |
| Cu | 2.83480800 | -1.14542400 | 0.21066900  |
| N  | 4.04300000 | -2.58475700 | 0.59166800  |
| C  | 4.75115300 | -3.45941300 | 0.86271700  |
| C  | 5.63405100 | -4.54844700 | 1.19753300  |
| H  | 6.25802500 | -4.80063300 | 0.33491300  |
| H  | 6.27697700 | -4.26130500 | 2.03486100  |
| H  | 5.04772800 | -5.42705000 | 1.48349300  |

## A2

|   |             |             |             |
|---|-------------|-------------|-------------|
| C | 1.21966100  | 1.71487800  | 0.34059200  |
| C | 1.21388500  | 0.57411700  | 0.83087300  |
| N | 1.63070100  | -0.56774000 | 1.40839000  |
| C | 0.79253000  | -1.78253900 | 1.36662900  |
| C | -0.57598200 | -1.44622500 | 0.97569800  |
| C | -1.78047000 | -1.48584500 | 0.73566600  |
| C | -3.17745700 | -1.47384300 | 0.47333800  |
| C | -4.07245200 | -0.99135400 | 1.44775700  |
| C | -3.67755100 | -1.87245000 | -0.77330500 |
| C | -5.42112400 | -0.91200600 | 1.17574100  |
| H | -3.68862300 | -0.67666100 | 2.41593400  |
| C | -5.03398600 | -1.79839100 | -1.05282200 |

|   |             |             |             |
|---|-------------|-------------|-------------|
| H | -2.98964300 | -2.24465800 | -1.52943800 |
| C | -5.91403400 | -1.31287200 | -0.07760600 |
| H | -6.12989200 | -0.54862600 | 1.91559000  |
| H | -5.39740000 | -2.12231700 | -2.02315800 |
| S | 3.31956100  | -0.75593300 | 1.73369100  |
| O | 3.36489300  | -1.83191900 | 2.70635000  |
| O | 3.79789000  | 0.58307700  | 2.00966700  |
| C | 3.97837200  | -1.32363600 | 0.20011500  |
| C | 4.14217100  | -2.69141000 | -0.00378500 |
| C | 4.29123600  | -0.39309900 | -0.79275600 |
| C | 4.62292400  | -3.13032200 | -1.23060100 |
| H | 3.92012400  | -3.39400700 | 0.79551900  |
| C | 4.76415900  | -0.85571600 | -2.00999500 |
| H | 4.19027200  | 0.67306000  | -0.60299300 |
| C | 4.93342900  | -2.22600300 | -2.24896200 |
| H | 4.77016500  | -4.19532800 | -1.39970900 |
| H | 5.02263400  | -0.14403300 | -2.79228300 |
| C | 5.43881100  | -2.70058400 | -3.57409600 |
| H | 4.69234100  | -2.53255400 | -4.36068400 |
| H | 6.34218500  | -2.15615600 | -3.87198800 |
| H | 5.67323500  | -3.76926400 | -3.56004700 |
| H | 1.20870300  | -2.50321400 | 0.64442100  |
| H | 0.80422300  | -2.25285200 | 2.35616900  |
| C | 1.33736700  | 3.04905300  | -0.11562000 |
| C | 0.75206700  | 3.59853800  | -1.19572100 |
| C | 2.14577600  | 4.07314300  | 0.65584200  |
| C | 1.07094000  | 5.05581300  | -1.30393000 |
| H | 0.09005100  | 3.06574100  | -1.87578900 |
| C | 2.27041900  | 5.21937100  | -0.35678900 |
| H | 3.11103900  | 3.67669400  | 0.99239500  |
| H | 1.59484600  | 4.37044800  | 1.56036800  |

|    |             |             |             |
|----|-------------|-------------|-------------|
| H  | 1.28842200  | 5.36898300  | -2.33228300 |
| H  | 0.20604800  | 5.65587300  | -0.97790700 |
| H  | 2.31002000  | 6.20357700  | 0.11911000  |
| H  | 3.19812600  | 5.09489100  | -0.92851100 |
| O  | -7.23713300 | -1.17914100 | -0.24743200 |
| C  | -7.80818500 | -1.59136300 | -1.47690800 |
| H  | -8.88109600 | -1.41079000 | -1.39164600 |
| H  | -7.41216800 | -1.00779800 | -2.31891700 |
| H  | -7.63798000 | -2.65999900 | -1.66023400 |
| Cu | -0.75342800 | 0.63819500  | 0.31425900  |
| N  | -2.36905000 | 1.53871900  | -0.29386800 |
| C  | -3.44381900 | 1.87547600  | -0.56043600 |
| C  | -4.79469100 | 2.26668200  | -0.87897400 |
| H  | -4.92330600 | 3.34277300  | -0.72949000 |
| H  | -5.01812600 | 2.01908900  | -1.92135900 |
| H  | -5.48851200 | 1.72492300  | -0.22565800 |

**TS<sub>A2</sub>**

Number of imaginary frequencies: 1

Lowest frequency (cm<sup>-1</sup>): -330.5

|   |             |             |             |
|---|-------------|-------------|-------------|
| C | 0.13262300  | -1.84255600 | -1.08458200 |
| C | -1.16842700 | -2.01202300 | -1.02026800 |
| N | -2.00585400 | -0.93484200 | -1.04740100 |
| C | -1.24842900 | 0.30429600  | -1.41314600 |
| C | 0.18263000  | 0.07028000  | -1.04902800 |
| C | 1.22300600  | 0.75330400  | -0.83149600 |
| C | 2.42679200  | 1.44457100  | -0.69201600 |
| C | 3.18091200  | 1.79387900  | -1.84160800 |
| C | 2.91184200  | 1.81910300  | 0.57966400  |
| C | 4.35904600  | 2.48527700  | -1.71416800 |
| H | 2.81371000  | 1.50528600  | -2.82376300 |

|   |             |             |             |
|---|-------------|-------------|-------------|
| C | 4.09241700  | 2.52116100  | 0.70945000  |
| H | 2.33992000  | 1.54519200  | 1.46493300  |
| C | 4.82600700  | 2.86028500  | -0.43996100 |
| H | 4.95372400  | 2.76150000  | -2.58050300 |
| H | 4.44607000  | 2.80125300  | 1.69679800  |
| S | -2.90269600 | -0.81048800 | 0.43529200  |
| O | -1.93918000 | -0.32353500 | 1.43734200  |
| O | -3.56982800 | -2.08091800 | 0.63049600  |
| C | -4.05693700 | 0.46730800  | 0.07535700  |
| C | -4.02014900 | 1.65908400  | 0.79624500  |
| C | -5.01955200 | 0.22572400  | -0.90216600 |
| C | -4.97417500 | 2.62701500  | 0.52107500  |
| H | -3.26058600 | 1.81123800  | 1.55935200  |
| C | -5.95931200 | 1.21149300  | -1.16317300 |
| H | -5.03043500 | -0.71553600 | -1.44753800 |
| C | -5.95294500 | 2.41976200  | -0.45819500 |
| H | -4.96696900 | 3.56294700  | 1.07727200  |
| H | -6.71801500 | 1.04305100  | -1.92472600 |
| C | -6.96912400 | 3.48091200  | -0.73662900 |
| H | -7.53202200 | 3.73369700  | 0.16982600  |
| H | -6.48842400 | 4.40526300  | -1.07941200 |
| H | -7.68424400 | 3.16775300  | -1.50290000 |
| H | -1.32665100 | 0.43097900  | -2.49868600 |
| H | -1.67653400 | 1.19018900  | -0.93253800 |
| C | 1.31034500  | -2.60149400 | -1.39051300 |
| C | 2.56808800  | -2.17076300 | -1.59618200 |
| C | 1.20978400  | -4.09967800 | -1.58090800 |
| C | 3.48511800  | -3.30369100 | -1.94082500 |
| H | 2.87933000  | -1.12906400 | -1.59974300 |
| C | 2.67678700  | -4.54500300 | -1.53415900 |
| H | 0.73635600  | -4.30862000 | -2.55181500 |

|    |            |             |             |
|----|------------|-------------|-------------|
| H  | 0.58043400 | -4.57380600 | -0.81870200 |
| H  | 3.70339100 | -3.29352000 | -3.02067500 |
| H  | 4.45667200 | -3.23868500 | -1.43522900 |
| H  | 2.93544500 | -4.82116700 | -0.50418500 |
| H  | 2.87883100 | -5.41567600 | -2.16511300 |
| O  | 5.97627000 | 3.53284900  | -0.42604500 |
| C  | 6.51407300 | 3.95361100  | 0.81917900  |
| H  | 7.42860600 | 4.50001000  | 0.58402800  |
| H  | 5.82208300 | 4.62194500  | 1.34609800  |
| H  | 6.76218200 | 3.09513700  | 1.45542700  |
| Cu | 0.40230700 | -0.85921400 | 0.83394000  |
| N  | 0.97030100 | -1.19495200 | 2.63607300  |
| C  | 1.16711500 | -1.49183000 | 3.73687700  |
| C  | 1.40763500 | -1.86650000 | 5.10836300  |
| H  | 0.49778800 | -2.29884800 | 5.53552900  |
| H  | 2.21108600 | -2.60780300 | 5.15592600  |
| H  | 1.69424200 | -0.98746400 | 5.69324500  |

## **B2**

|   |             |             |             |
|---|-------------|-------------|-------------|
| C | 0.38982700  | -1.14248100 | -0.30061600 |
| C | -0.93239900 | -0.86700400 | -0.02196700 |
| N | -1.04727100 | 0.47513200  | 0.30046600  |
| C | 0.24431100  | 1.17323300  | 0.31593100  |
| C | 1.20200700  | 0.04901700  | -0.03119200 |
| C | 2.49716800  | 0.21502800  | -0.05443300 |
| C | 3.83737300  | 0.44350500  | -0.02642400 |
| C | 4.53163300  | 0.94964100  | -1.17497000 |
| C | 4.59300000  | 0.16921200  | 1.15671800  |
| C | 5.87745300  | 1.16316700  | -1.13394100 |
| H | 3.96188700  | 1.15364000  | -2.07809800 |
| C | 5.94146800  | 0.39931900  | 1.20688700  |

|   |             |             |             |
|---|-------------|-------------|-------------|
| H | 4.06793400  | -0.22621100 | 2.02263700  |
| C | 6.59761800  | 0.89637500  | 0.05747000  |
| H | 6.43005900  | 1.53963900  | -1.99005500 |
| H | 6.49645300  | 0.19090400  | 2.11542600  |
| S | -2.33064600 | 1.10282500  | 1.21041000  |
| O | -1.83190500 | 1.47780900  | 2.52660400  |
| O | -3.42345000 | 0.14540500  | 1.07723100  |
| C | -2.71272800 | 2.57397000  | 0.31067700  |
| C | -2.51387100 | 3.81351100  | 0.91134000  |
| C | -3.22098500 | 2.46026400  | -0.98127700 |
| C | -2.83417700 | 4.95897300  | 0.19631600  |
| H | -2.12390200 | 3.86969200  | 1.92455300  |
| C | -3.53291600 | 3.61770900  | -1.67851100 |
| H | -3.36890300 | 1.47907900  | -1.42942900 |
| C | -3.34683000 | 4.87925500  | -1.10214200 |
| H | -2.69185100 | 5.93695000  | 0.65360200  |
| H | -3.93443700 | 3.54702500  | -2.68774200 |
| C | -3.68031200 | 6.12734500  | -1.85639200 |
| H | -4.30971500 | 6.79523600  | -1.25701500 |
| H | -2.77232900 | 6.68891900  | -2.10976600 |
| H | -4.20845100 | 5.90842500  | -2.78947300 |
| H | 0.26830000  | 1.96101000  | -0.44699000 |
| H | 0.44192400  | 1.62003500  | 1.29778600  |
| C | 0.93615200  | -2.40178400 | -0.75000700 |
| C | 2.18729000  | -2.64447400 | -1.18218600 |
| C | 0.10618300  | -3.66182800 | -0.82877400 |
| C | 2.38699400  | -4.07661000 | -1.57877600 |
| H | 2.95677500  | -1.88656600 | -1.32061100 |
| C | 1.15648700  | -4.77079900 | -0.97527100 |
| H | -0.56523100 | -3.61281300 | -1.70161400 |
| H | -0.54155800 | -3.79560100 | 0.05012800  |

|    |             |             |             |
|----|-------------|-------------|-------------|
| H  | 2.41157700  | -4.17375200 | -2.67648300 |
| H  | 3.33220100  | -4.50178500 | -1.21618700 |
| H  | 1.41291800  | -5.15541800 | 0.02000500  |
| H  | 0.80514100  | -5.61983800 | -1.57051000 |
| O  | 7.89046000  | 1.14317300  | -0.00046700 |
| C  | 8.71469800  | 0.90203700  | 1.14207400  |
| H  | 9.72471100  | 1.18304700  | 0.84362200  |
| H  | 8.39830000  | 1.52080300  | 1.98897800  |
| H  | 8.69656700  | -0.15810800 | 1.41722200  |
| Cu | -2.45508900 | -2.02554700 | 0.08068500  |
| N  | -3.90267000 | -3.23099000 | 0.21693200  |
| C  | -4.81687300 | -3.92642200 | 0.35620000  |
| C  | -5.95569300 | -4.79320800 | 0.53197400  |
| H  | -6.32250400 | -5.12930000 | -0.44238200 |
| H  | -5.67066400 | -5.66638300 | 1.12646800  |
| H  | -6.75580600 | -4.25475500 | 1.04853200  |

### A3

|   |             |             |             |
|---|-------------|-------------|-------------|
| C | -1.50735000 | 1.29013200  | -0.76502400 |
| C | -1.36303600 | 0.07682600  | -0.88941800 |
| N | -1.07030000 | -1.20875600 | -1.15156000 |
| C | -0.03266900 | -1.50190800 | -2.17498300 |
| C | 1.25734900  | -0.91029400 | -1.86664800 |
| C | 2.30895100  | -0.37753200 | -1.58125400 |
| C | 3.55005800  | 0.23554800  | -1.24603300 |
| C | 3.79223200  | 1.58761600  | -1.54863400 |
| C | 4.55624600  | -0.49700600 | -0.60557500 |
| C | 4.99483500  | 2.17782700  | -1.21828800 |
| H | 3.01939400  | 2.16596200  | -2.05020800 |
| C | 5.77077800  | 0.08762200  | -0.27196100 |
| H | 4.37563500  | -1.54513200 | -0.37228100 |

|   |             |             |             |
|---|-------------|-------------|-------------|
| C | 5.99554900  | 1.43298200  | -0.57935100 |
| H | 5.19670600  | 3.22097200  | -1.44809400 |
| H | 6.53540900  | -0.50682300 | 0.22027400  |
| S | -1.23368000 | -2.32528500 | 0.15456200  |
| O | -1.47660200 | -3.61716400 | -0.46347300 |
| O | -2.22146100 | -1.69961500 | 1.03225300  |
| C | 0.34064800  | -2.32810600 | 0.93777200  |
| C | 1.20639500  | -3.39575000 | 0.71951100  |
| C | 0.72111400  | -1.21104700 | 1.68150000  |
| C | 2.47849400  | -3.34105400 | 1.27205100  |
| H | 0.88439000  | -4.25111200 | 0.13081600  |
| C | 1.99790500  | -1.17639200 | 2.21733300  |
| H | 0.02935200  | -0.38509200 | 1.83162300  |
| C | 2.89123600  | -2.23752900 | 2.02456300  |
| H | 3.16854400  | -4.16844100 | 1.11600400  |
| H | 2.31688700  | -0.31026800 | 2.79428700  |
| C | 4.25951000  | -2.19356700 | 2.62720000  |
| H | 4.62964000  | -1.16580600 | 2.70695100  |
| H | 4.25027600  | -2.61520400 | 3.64069200  |
| H | 4.97785000  | -2.77827700 | 2.04166000  |
| H | 0.02333600  | -2.59399800 | -2.26484600 |
| H | -0.42408700 | -1.12871100 | -3.12898100 |
| C | -1.62176600 | 2.69573500  | -0.60289900 |
| C | -0.64689200 | 3.49498000  | -0.13104500 |
| C | -2.83247100 | 3.50036800  | -1.02234600 |
| C | -1.05942100 | 4.93161200  | -0.15332700 |
| H | 0.33421300  | 3.14418400  | 0.18098300  |
| C | -2.58334000 | 4.85339300  | -0.34348100 |
| H | -3.77753600 | 3.03105800  | -0.71928600 |
| H | -2.85907300 | 3.58701300  | -2.11887300 |
| H | -0.76232400 | 5.47917800  | 0.74917800  |



|    |             |             |             |
|----|-------------|-------------|-------------|
| H  | -0.56739900 | 5.44337700  | -0.99580200 |
| H  | -2.99011900 | 5.69889900  | -0.90592000 |
| H  | -3.06645800 | 4.85463800  | 0.64316000  |
| O  | 7.13398800  | 2.09768200  | -0.30452300 |
| C  | 8.18382500  | 1.39181700  | 0.32372100  |
| H  | 9.00152200  | 2.10424600  | 0.44988100  |
| H  | 7.88454200  | 1.01485900  | 1.31155800  |
| H  | 8.53352500  | 0.55323600  | -0.29347000 |
| Cu | -3.43158700 | 0.19347500  | 0.02962200  |
| N  | -4.10183400 | 1.30057900  | 1.51511300  |
| C  | -4.45547300 | 1.92560100  | 2.42267400  |
| C  | -4.89444400 | 2.70727600  | 3.55344800  |
| H  | -4.68005500 | 2.16943000  | 4.48187100  |
| H  | -4.36983600 | 3.66735700  | 3.56889500  |
| H  | -5.97109600 | 2.88918700  | 3.48724500  |
| N  | -4.39133100 | -1.11723200 | -1.14099100 |
| C  | -4.80018600 | -2.05421800 | -1.68375300 |
| C  | -5.29502300 | -3.23567400 | -2.34781800 |
| H  | -4.54344800 | -4.02894400 | -2.28320900 |
| H  | -6.21575400 | -3.57665200 | -1.86535100 |
| H  | -5.50060500 | -3.02025200 | -3.40037800 |

### TS<sub>A3</sub>

Number of imaginary frequencies: 1

Lowest frequency (cm<sup>-1</sup>): -536.7

|   |             |             |             |
|---|-------------|-------------|-------------|
| C | 0.57393800  | 0.36404600  | 0.04343000  |
| C | -0.64308200 | 0.36427500  | -0.42525000 |
| N | -1.01604500 | -0.43800700 | -1.47738000 |
| C | 0.00065700  | -1.41916600 | -1.93413500 |
| C | 1.27177100  | -1.04612700 | -1.31835800 |
| C | 2.50174200  | -1.07993600 | -1.19889300 |

|   |             |             |             |
|---|-------------|-------------|-------------|
| C | 3.85126300  | -0.92829800 | -0.86246700 |
| C | 4.61120100  | 0.12895000  | -1.41663700 |
| C | 4.46200700  | -1.78557300 | 0.07478200  |
| C | 5.91751300  | 0.32111400  | -1.03593100 |
| H | 4.14608000  | 0.79022700  | -2.14405600 |
| C | 5.77926500  | -1.60604700 | 0.45197600  |
| H | 3.87945900  | -2.59851600 | 0.50270100  |
| C | 6.51512300  | -0.54659400 | -0.10211800 |
| H | 6.51926900  | 1.12792600  | -1.44537100 |
| H | 6.23166800  | -2.28115600 | 1.17155600  |
| S | -2.64509800 | -0.81745700 | -1.72166800 |
| O | -2.72406000 | -1.31412000 | -3.08486100 |
| O | -3.38990600 | 0.36242300  | -1.28940300 |
| C | -2.99121700 | -2.14795700 | -0.60965900 |
| C | -2.97221800 | -3.45687600 | -1.08884600 |
| C | -3.23141700 | -1.87063100 | 0.73480500  |
| C | -3.19993900 | -4.49824000 | -0.20145800 |
| H | -2.79876000 | -3.64600000 | -2.14534800 |
| C | -3.45594500 | -2.92816300 | 1.60493300  |
| H | -3.25087300 | -0.84159500 | 1.08874600  |
| C | -3.44417500 | -4.25147900 | 1.15355500  |
| H | -3.19550500 | -5.52498900 | -0.56361000 |
| H | -3.64958700 | -2.72767600 | 2.65730000  |
| C | -3.70727300 | -5.38752100 | 2.09054700  |
| H | -3.69148800 | -5.06321500 | 3.13555100  |
| H | -4.69006400 | -5.83525900 | 1.89610600  |
| H | -2.96538800 | -6.18502100 | 1.96811600  |
| H | -0.28332700 | -2.43810800 | -1.62499100 |
| H | 0.06379300  | -1.39971400 | -3.02703400 |
| C | 1.57635400  | 1.10207800  | 0.73044300  |
| C | 2.46450700  | 0.60382100  | 1.61519100  |

|    |             |             |             |
|----|-------------|-------------|-------------|
| C  | 1.88959500  | 2.55179400  | 0.41847700  |
| C  | 3.47587800  | 1.62453000  | 2.02129200  |
| H  | 2.47704100  | -0.43200900 | 1.94815500  |
| C  | 2.84568400  | 2.94683300  | 1.55140500  |
| H  | 0.98347500  | 3.17048600  | 0.37210800  |
| H  | 2.36695200  | 2.61910200  | -0.57227300 |
| H  | 3.70325800  | 1.60743800  | 3.09397800  |
| H  | 4.42947100  | 1.42083100  | 1.50293500  |
| H  | 3.58911800  | 3.68981100  | 1.24741700  |
| H  | 2.26830200  | 3.38099100  | 2.37708600  |
| O  | 7.78902200  | -0.28125300 | 0.19524900  |
| C  | 8.46562400  | -1.12171500 | 1.11686900  |
| H  | 9.47521200  | -0.71859600 | 1.21083700  |
| H  | 7.97973300  | -1.10772000 | 2.10058300  |
| H  | 8.52245600  | -2.15320900 | 0.74746800  |
| Cu | -1.94304800 | 1.67112000  | 0.28469500  |
| N  | -2.23787300 | 3.43276300  | -0.78402000 |
| C  | -2.48402100 | 4.27599800  | -1.53837700 |
| C  | -2.79141100 | 5.32641600  | -2.48095800 |
| H  | -2.93096200 | 4.89961300  | -3.47863300 |
| H  | -3.70933900 | 5.84194300  | -2.18378400 |
| H  | -1.97202900 | 6.05051900  | -2.51542800 |
| N  | -3.15187400 | 1.94576100  | 1.86800200  |
| C  | -3.88050500 | 2.15929600  | 2.74202400  |
| C  | -4.78784900 | 2.43003400  | 3.83216000  |
| H  | -5.45929100 | 3.25078100  | 3.56378900  |
| H  | -5.38442000 | 1.54023800  | 4.05372900  |
| H  | -4.22259800 | 2.71048600  | 4.72601400  |

**B3**

|   |             |             |             |
|---|-------------|-------------|-------------|
| C | -0.44812900 | -1.03867200 | -0.01348200 |
|---|-------------|-------------|-------------|

|   |             |             |             |
|---|-------------|-------------|-------------|
| C | 0.78550900  | -0.60074500 | -0.45912800 |
| N | 0.57786800  | 0.40635400  | -1.38151700 |
| C | -0.83537900 | 0.78225300  | -1.52936100 |
| C | -1.50464500 | -0.21033900 | -0.59981600 |
| C | -2.80005000 | -0.22713900 | -0.42490000 |
| C | -4.16004400 | -0.21766400 | -0.35434900 |
| C | -4.95671900 | -0.97712200 | -1.27348300 |
| C | -4.83021800 | 0.56261000  | 0.63816900  |
| C | -6.31830400 | -0.94400800 | -1.20389300 |
| H | -4.45061100 | -1.57930000 | -2.02368600 |
| C | -6.19785100 | 0.61605900  | 0.69722700  |
| H | -4.22508800 | 1.12352800  | 1.34596600  |
| C | -6.95438400 | -0.13869300 | -0.22757300 |
| H | -6.94676800 | -1.51082200 | -1.88486200 |
| H | -6.69060300 | 1.22202700  | 1.45068400  |
| S | 1.77202300  | 1.49023100  | -1.87315400 |
| O | 1.27602400  | 2.06579100  | -3.11363600 |
| O | 3.03309400  | 0.76440400  | -1.81365400 |
| C | 1.78035200  | 2.75543400  | -0.63522500 |
| C | 1.11001000  | 3.95094700  | -0.87742400 |
| C | 2.42592900  | 2.51903800  | 0.57882700  |
| C | 1.08900700  | 4.92271500  | 0.11550100  |
| H | 0.63100800  | 4.11782500  | -1.83926100 |
| C | 2.38992400  | 3.50052100  | 1.55635000  |
| H | 2.95273100  | 1.58115600  | 0.74609300  |
| C | 1.72538000  | 4.71446800  | 1.34115200  |
| H | 0.57580600  | 5.86585100  | -0.06487800 |
| H | 2.89061800  | 3.33209600  | 2.50888500  |
| C | 1.72619600  | 5.77376600  | 2.39804700  |
| H | 1.58323900  | 5.34504000  | 3.39634800  |
| H | 2.68476200  | 6.30814000  | 2.41364300  |

|    |              |             |             |
|----|--------------|-------------|-------------|
| H  | 0.94067000   | 6.51687800  | 2.22775300  |
| H  | -1.00706000  | 1.82257700  | -1.21965000 |
| H  | -1.16774200  | 0.66579400  | -2.56565400 |
| C  | -0.69293400  | -2.15524000 | 0.86902400  |
| C  | -1.87857400  | -2.68792200 | 1.21773600  |
| C  | 0.43376400   | -2.94242400 | 1.49734200  |
| C  | -1.72854300  | -3.86690600 | 2.13319600  |
| H  | -2.84298000  | -2.36913300 | 0.82502000  |
| C  | -0.26785900  | -3.75233700 | 2.59566200  |
| H  | 1.23846500   | -2.29771700 | 1.88130400  |
| H  | 0.89778500   | -3.59377200 | 0.73788400  |
| H  | -2.43704600  | -3.86264200 | 2.97221200  |
| H  | -1.90930300  | -4.80821800 | 1.58819100  |
| H  | 0.20352100   | -4.72310400 | 2.78200600  |
| H  | -0.23309000  | -3.18710200 | 3.53598200  |
| O  | -8.27255800  | -0.15737800 | -0.25840300 |
| C  | -9.01882900  | 0.63874100  | 0.66242800  |
| H  | -10.06832300 | 0.44699600  | 0.43724600  |
| H  | -8.80875400  | 0.34341000  | 1.69628900  |
| H  | -8.80354400  | 1.70338100  | 0.51879200  |
| Cu | 2.58021200   | -1.22834900 | -0.04689100 |
| N  | 3.71018500   | -2.54397500 | -1.17798800 |
| C  | 4.31275400   | -3.11815800 | -1.98293800 |
| C  | 5.06492700   | -3.83207800 | -2.98904400 |
| H  | 4.38667400   | -4.23647200 | -3.74601700 |
| H  | 5.77259700   | -3.15292600 | -3.47342600 |
| H  | 5.61910000   | -4.65603800 | -2.53028200 |
| N  | 3.90457100   | -0.98681600 | 1.48626400  |
| C  | 4.65212900   | -0.89501500 | 2.36600700  |
| C  | 5.58344800   | -0.78126600 | 3.46458400  |
| H  | 6.50733700   | -1.31825800 | 3.23013600  |

|   |            |             |            |
|---|------------|-------------|------------|
| H | 5.82132800 | 0.27096900  | 3.64677700 |
| H | 5.14469500 | -1.20814500 | 4.37123900 |

#### A4

|   |             |             |             |
|---|-------------|-------------|-------------|
| C | -0.44843200 | 0.28380100  | -0.21803400 |
| C | 0.57154000  | -0.12601300 | 0.37610300  |
| N | 1.08526100  | -1.09799000 | 1.17432800  |
| C | 0.33988100  | -2.39329500 | 1.31497700  |
| C | -1.08776600 | -2.21079400 | 1.19165800  |
| C | -2.27334700 | -2.02047800 | 1.02029100  |
| C | -3.65308400 | -1.77131700 | 0.77274200  |
| C | -4.41774500 | -0.98735100 | 1.65621500  |
| C | -4.26524800 | -2.26234200 | -0.38686600 |
| C | -5.73993300 | -0.70228800 | 1.37972900  |
| H | -3.95479300 | -0.60451700 | 2.56350800  |
| C | -5.59851600 | -1.99144700 | -0.66712500 |
| H | -3.68140500 | -2.86730800 | -1.07758600 |
| C | -6.34334400 | -1.20419000 | 0.21760900  |
| H | -6.34282800 | -0.09782600 | 2.05264400  |
| H | -6.04511200 | -2.39712200 | -1.56970200 |
| S | 2.77100600  | -1.20413300 | 1.43430600  |
| O | 2.91599100  | -2.11742100 | 2.55574700  |
| O | 3.25095300  | 0.16564600  | 1.50662000  |
| C | 3.40068200  | -1.97615900 | -0.02386700 |
| C | 3.68109900  | -3.34161800 | -0.00465100 |
| C | 3.56651000  | -1.21374700 | -1.17853300 |
| C | 4.14111100  | -3.94419100 | -1.16591200 |
| H | 3.55368600  | -3.91112400 | 0.91262900  |
| C | 4.02252100  | -1.83981400 | -2.33030400 |
| H | 3.35027500  | -0.14695300 | -1.16907600 |
| C | 4.31615100  | -3.20675700 | -2.34229200 |

|    |             |             |             |
|----|-------------|-------------|-------------|
| H  | 4.37386900  | -5.00784800 | -1.16473400 |
| H  | 4.16006700  | -1.25934100 | -3.24087700 |
| C  | 4.81704900  | -3.87768700 | -3.58180400 |
| H  | 5.83022500  | -4.27112700 | -3.43381700 |
| H  | 4.18401700  | -4.73073400 | -3.85376000 |
| H  | 4.84431200  | -3.19023400 | -4.43264200 |
| H  | 0.69253600  | -3.09775500 | 0.54424600  |
| H  | 0.61394100  | -2.80248100 | 2.29329500  |
| C  | -1.65674700 | 0.84265700  | -0.69137400 |
| C  | -2.32268100 | 0.45764900  | -1.79776800 |
| C  | -2.46440900 | 1.83873200  | 0.11189200  |
| C  | -3.65150100 | 1.13444300  | -1.89249800 |
| H  | -1.96809800 | -0.29824400 | -2.49469700 |
| C  | -3.52514000 | 2.29784400  | -0.89481100 |
| H  | -1.84764200 | 2.65350300  | 0.51192900  |
| H  | -2.91711700 | 1.31937900  | 0.97149300  |
| H  | -3.90654000 | 1.45231200  | -2.91070700 |
| H  | -4.43674800 | 0.42307900  | -1.58262600 |
| H  | -4.47784400 | 2.56039700  | -0.42434700 |
| H  | -3.15986600 | 3.19029500  | -1.42388600 |
| O  | -7.63747300 | -0.87681700 | 0.04370400  |
| C  | -8.30237900 | -1.35446300 | -1.10801500 |
| H  | -9.32680300 | -0.98142200 | -1.04880200 |
| H  | -7.83876700 | -0.97576400 | -2.02943200 |
| H  | -8.32532600 | -2.45208000 | -1.13776300 |
| Cu | 1.21370700  | 1.77003100  | -0.11778800 |
| N  | 1.08401500  | 2.58486000  | 2.02111300  |
| C  | 1.42137100  | 2.09548500  | 3.01859700  |
| C  | 1.84510400  | 1.46980100  | 4.25076700  |
| H  | 1.30786000  | 0.52676100  | 4.39406300  |
| H  | 2.91763400  | 1.25829500  | 4.20706200  |

|   |             |            |             |
|---|-------------|------------|-------------|
| H | 1.64087600  | 2.12553700 | 5.10223000  |
| N | 3.16053400  | 2.34725300 | -0.45306400 |
| C | 4.24761500  | 2.74320600 | -0.46894100 |
| C | 5.60713800  | 3.23117300 | -0.48025300 |
| H | 6.00161800  | 3.22251000 | -1.50036600 |
| H | 5.63933200  | 4.25490300 | -0.09626900 |
| H | 6.23489800  | 2.59471200 | 0.15036600  |
| N | 0.29251900  | 3.34280700 | -1.10374800 |
| C | -0.29187600 | 4.22049900 | -1.58071500 |
| C | -1.03131000 | 5.31498800 | -2.16590900 |
| H | -1.58089000 | 4.96863500 | -3.04643600 |
| H | -1.74083600 | 5.71647100 | -1.43584000 |
| H | -0.34609000 | 6.11259400 | -2.46755100 |

#### TS<sub>A4</sub>

Number of imaginary frequencies: 1

Lowest frequency (cm<sup>-1</sup>): -519.9

|   |             |             |             |
|---|-------------|-------------|-------------|
| C | -0.59661700 | -0.13768700 | -0.18301300 |
| C | 0.64410300  | -0.07692800 | -0.57311400 |
| N | 1.07673400  | 0.91291800  | -1.42885200 |
| C | 0.07958400  | 1.99126600  | -1.68261700 |
| C | -1.21932400 | 1.50508400  | -1.22288500 |
| C | -2.45245900 | 1.55914000  | -1.13632300 |
| C | -3.81395500 | 1.39854400  | -0.85375400 |
| C | -4.65366600 | 0.66420900  | -1.72424300 |
| C | -4.35932500 | 1.91540800  | 0.33789100  |
| C | -5.97382200 | 0.45353900  | -1.40643100 |
| H | -4.24038900 | 0.26851100  | -2.64924300 |
| C | -5.68716700 | 1.70828300  | 0.66289500  |
| H | -3.71732900 | 2.48467300  | 1.00652300  |
| C | -6.50399000 | 0.97381200  | -0.21064000 |



|   |             |             |             |
|---|-------------|-------------|-------------|
| H | -6.63633500 | -0.10697600 | -2.06026000 |
| H | -6.08495100 | 2.11865300  | 1.58558700  |
| S | 2.70231500  | 1.36957000  | -1.52556400 |
| O | 2.75137900  | 2.29544200  | -2.64752400 |
| O | 3.48433100  | 0.14391400  | -1.52344900 |
| C | 3.03064400  | 2.26902300  | -0.03658900 |
| C | 3.08953100  | 3.66082500  | -0.07757700 |
| C | 3.19671900  | 1.57165900  | 1.15859600  |
| C | 3.32380800  | 4.35691200  | 1.09946600  |
| H | 2.97134200  | 4.18086800  | -1.02495800 |
| C | 3.42465200  | 2.28866800  | 2.32510600  |
| H | 3.15408700  | 0.48412100  | 1.16944400  |
| C | 3.49394900  | 3.68486000  | 2.31435700  |
| H | 3.38204300  | 5.44407600  | 1.07909900  |
| H | 3.55806700  | 1.75817400  | 3.26647800  |
| C | 3.76082400  | 4.45518000  | 3.56890000  |
| H | 4.73878500  | 4.95035500  | 3.52344300  |
| H | 3.01350700  | 5.24335800  | 3.71809500  |
| H | 3.75476800  | 3.80813200  | 4.45149700  |
| H | 0.35404400  | 2.90312700  | -1.12794600 |
| H | 0.06519900  | 2.23575400  | -2.74932300 |
| C | -1.67799200 | -0.94213200 | 0.28892200  |
| C | -2.42118800 | -0.70004300 | 1.38431000  |
| C | -2.24022500 | -2.09987200 | -0.50553100 |
| C | -3.56330200 | -1.65571100 | 1.50937100  |
| H | -2.23934200 | 0.12241800  | 2.07338100  |
| C | -3.23819500 | -2.74380400 | 0.46799000  |
| H | -1.45170500 | -2.78651300 | -0.84203700 |
| H | -2.73256800 | -1.71386400 | -1.41268100 |
| H | -3.68427700 | -2.05315600 | 2.52556600  |
| H | -4.50691100 | -1.13213900 | 1.27821600  |

|    |             |             |             |
|----|-------------|-------------|-------------|
| H  | -4.13223700 | -3.13171000 | -0.03001700 |
| H  | -2.75727900 | -3.59515200 | 0.96838400  |
| O  | -7.79754200 | 0.71851400  | 0.00455100  |
| C  | -8.40755200 | 1.22331800  | 1.18178800  |
| H  | -9.45121100 | 0.90750100  | 1.14305800  |
| H  | -7.93992900 | 0.80746200  | 2.08338000  |
| H  | -8.36474900 | 2.31924100  | 1.21620400  |
| Cu | 1.55420200  | -1.72057500 | 0.11561300  |
| N  | 1.80315900  | -2.86635400 | -1.80591200 |
| C  | 2.27307000  | -2.49204100 | -2.79987000 |
| C  | 2.85470400  | -1.99936100 | -4.02786400 |
| H  | 2.36711600  | -1.06159900 | -4.31304500 |
| H  | 3.92087800  | -1.80455300 | -3.88094200 |
| H  | 2.72843100  | -2.73003000 | -4.83205000 |
| N  | 3.46963200  | -2.05295100 | 0.81055000  |
| C  | 4.58111600  | -2.29823200 | 1.02205400  |
| C  | 5.96989400  | -2.60242200 | 1.28137500  |
| H  | 6.20748400  | -2.41085600 | 2.33189400  |
| H  | 6.17054700  | -3.65464300 | 1.05894300  |
| H  | 6.61117600  | -1.97780300 | 0.65250300  |
| N  | 0.54819600  | -3.12985000 | 1.30601400  |
| C  | 0.00448500  | -3.85996700 | 2.02148900  |
| C  | -0.68152700 | -4.76929600 | 2.91188500  |
| H  | -1.47903000 | -4.24220500 | 3.44508900  |
| H  | -1.11880700 | -5.59434700 | 2.34166700  |
| H  | 0.02062400  | -5.18003900 | 3.64342400  |

**B4**

|   |             |             |            |
|---|-------------|-------------|------------|
| C | 0.80179100  | -0.74606000 | 0.16135100 |
| C | -0.48935900 | -0.35612400 | 0.47305300 |
| N | -0.41218500 | 0.90970400  | 1.03542200 |

|   |             |             |             |
|---|-------------|-------------|-------------|
| C | 0.92678100  | 1.51041100  | 0.95375600  |
| C | 1.73993600  | 0.33373200  | 0.46861800  |
| C | 3.04395400  | 0.36082000  | 0.36969600  |
| C | 4.40114900  | 0.43707800  | 0.29413700  |
| C | 5.22220200  | 0.04487800  | 1.40168500  |
| C | 5.04563900  | 0.91629800  | -0.88861600 |
| C | 6.58071800  | 0.14895900  | 1.33358500  |
| H | 4.73570400  | -0.32990300 | 2.29837800  |
| C | 6.41040200  | 1.00404800  | -0.96861300 |
| H | 4.42426200  | 1.20615700  | -1.73295900 |
| C | 7.18991100  | 0.62757800  | 0.14909200  |
| H | 7.22499000  | -0.13145100 | 2.16198800  |
| H | 6.88508600  | 1.36383100  | -1.87586800 |
| S | -1.69024900 | 1.87650000  | 1.53643100  |
| O | -1.12002500 | 2.77845700  | 2.52833700  |
| O | -2.79642400 | 0.99528600  | 1.87343700  |
| C | -2.11172800 | 2.83428400  | 0.10536400  |
| C | -1.79904800 | 4.19098700  | 0.07997600  |
| C | -2.72024600 | 2.20980400  | -0.98078400 |
| C | -2.11406600 | 4.93076900  | -1.05161800 |
| H | -1.32526300 | 4.65366500  | 0.94193100  |
| C | -3.02208400 | 2.96715800  | -2.10404800 |
| H | -2.95128800 | 1.14621500  | -0.94410200 |
| C | -2.72999200 | 4.33383100  | -2.15562400 |
| H | -1.88132000 | 5.99424000  | -1.08134100 |
| H | -3.49777500 | 2.49208300  | -2.96061400 |
| C | -3.08397200 | 5.15319700  | -3.35670700 |
| H | -3.94241700 | 5.80358000  | -3.14592300 |
| H | -2.25554600 | 5.80651800  | -3.65335400 |
| H | -3.34785700 | 4.52482000  | -4.21316700 |
| H | 0.94347800  | 2.32600300  | 0.21665500  |

|    |             |             |             |
|----|-------------|-------------|-------------|
| H  | 1.25319900  | 1.90279200  | 1.92114300  |
| C  | 1.24724000  | -2.04413400 | -0.31829900 |
| C  | 2.34459400  | -2.30871700 | -1.04996000 |
| C  | 0.60359000  | -3.33624500 | 0.13107100  |
| C  | 2.56958400  | -3.78338300 | -1.22143900 |
| H  | 3.01422600  | -1.55579300 | -1.46351200 |
| C  | 1.21192300  | -4.37572200 | -0.81335000 |
| H  | -0.49131100 | -3.31136600 | 0.11352300  |
| H  | 0.88807700  | -3.52105600 | 1.18065400  |
| H  | 2.86756200  | -4.06433400 | -2.24000700 |
| H  | 3.37676000  | -4.13699500 | -0.55802400 |
| H  | 1.28726100  | -5.37546500 | -0.37254800 |
| H  | 0.57723800  | -4.45457800 | -1.70825900 |
| O  | 8.50719900  | 0.68859100  | 0.17825700  |
| C  | 9.22083900  | 1.15780400  | -0.96624000 |
| H  | 10.27629600 | 1.11353100  | -0.69714700 |
| H  | 9.03702600  | 0.51238300  | -1.83214600 |
| H  | 8.94721300  | 2.19295800  | -1.19908400 |
| Cu | -2.14972100 | -1.32715400 | 0.05892000  |
| N  | -2.74784600 | -2.57683300 | 1.90352100  |
| C  | -2.76237400 | -2.03061700 | 2.92916600  |
| C  | -2.75886000 | -1.32598200 | 4.19169300  |
| H  | -1.79244500 | -0.83063800 | 4.33083000  |
| H  | -3.54118800 | -0.56156300 | 4.19213800  |
| H  | -2.92720000 | -2.02111600 | 5.01925600  |
| N  | -4.17005900 | -0.93218200 | -0.27589700 |
| C  | -5.31576800 | -0.76596800 | -0.25794800 |
| C  | -6.74583400 | -0.55687500 | -0.23087200 |
| H  | -7.13475200 | -0.47391300 | -1.24988800 |
| H  | -7.23733200 | -1.39776200 | 0.26728600  |
| H  | -6.97935300 | 0.36263800  | 0.31414800  |

|   |             |             |             |
|---|-------------|-------------|-------------|
| N | -2.26915700 | -2.90467200 | -1.48806900 |
| C | -2.27257900 | -3.76670500 | -2.26192300 |
| C | -2.26594600 | -4.85358500 | -3.21630300 |
| H | -1.53834000 | -4.65492100 | -4.00872600 |
| H | -1.99413700 | -5.78613900 | -2.71217600 |
| H | -3.25660900 | -4.97087800 | -3.66513500 |

## A5

|   |             |             |             |
|---|-------------|-------------|-------------|
| C | 0.52601000  | 2.04528900  | -1.29829100 |
| C | 1.03469700  | 1.02763200  | -0.79315200 |
| N | 1.35959200  | -0.27628600 | -0.65662000 |
| C | 0.64148900  | -1.28974400 | -1.44050400 |
| C | -0.77409900 | -1.40281400 | -1.03296200 |
| C | -1.82193800 | -0.90190000 | -0.58584400 |
| C | -3.02678600 | -0.38885600 | -0.05737900 |
| C | -3.24965500 | -0.42148100 | 1.33848300  |
| C | -4.00982800 | 0.16465600  | -0.89779400 |
| C | -4.41517500 | 0.08010300  | 1.86496800  |
| H | -2.48778100 | -0.84533400 | 1.99028500  |
| C | -5.18210000 | 0.67398600  | -0.37169500 |
| H | -3.84055400 | 0.18890900  | -1.97182900 |
| C | -5.39361300 | 0.63138600  | 1.01623200  |
| H | -4.61019500 | 0.06518900  | 2.93374900  |
| H | -5.93014300 | 1.09685500  | -1.03514100 |
| S | 2.05848800  | -0.79029800 | 0.83939800  |
| O | 1.18983700  | -1.80172300 | 1.41516600  |
| O | 2.30242400  | 0.47475200  | 1.54761900  |
| C | 3.58023900  | -1.50835500 | 0.34504700  |
| C | 3.80953800  | -2.85733800 | 0.60209600  |
| C | 4.53593800  | -0.70096100 | -0.27582100 |
| C | 5.02877000  | -3.40398900 | 0.22483800  |

|    |             |             |             |
|----|-------------|-------------|-------------|
| H  | 3.05173300  | -3.46027700 | 1.09555900  |
| C  | 5.74136400  | -1.27048700 | -0.64329400 |
| H  | 4.33840500  | 0.35105300  | -0.47309100 |
| C  | 6.00920300  | -2.62471300 | -0.39552600 |
| H  | 5.22817900  | -4.45562800 | 0.42018900  |
| H  | 6.49866100  | -0.65928500 | -1.13014900 |
| C  | 7.33156800  | -3.21116900 | -0.76770700 |
| H  | 7.71741500  | -2.77801000 | -1.69648500 |
| H  | 8.07409200  | -3.00747000 | 0.01449000  |
| H  | 7.27364900  | -4.29714100 | -0.88764800 |
| H  | 0.70380500  | -1.00295200 | -2.49668400 |
| H  | 1.18090800  | -2.23719500 | -1.33882200 |
| C  | -0.06770900 | 3.21068700  | -1.83369200 |
| C  | 0.16578700  | 3.69428800  | -3.07114000 |
| C  | -1.14475500 | 4.00361000  | -1.12410900 |
| C  | -0.72063000 | 4.85419500  | -3.37652400 |
| H  | 0.87068700  | 3.26333900  | -3.77791900 |
| C  | -1.26104300 | 5.26318600  | -1.99589500 |
| H  | -0.88060700 | 4.22485600  | -0.08145900 |
| H  | -2.07974400 | 3.42470600  | -1.09685800 |
| H  | -0.19498100 | 5.66340300  | -3.89683900 |
| H  | -1.52381400 | 4.52958300  | -4.05678000 |
| H  | -2.27957900 | 5.65860400  | -2.03751100 |
| H  | -0.62231100 | 6.05188000  | -1.58077100 |
| O  | -6.48789600 | 1.08841100  | 1.62257200  |
| C  | -7.52137100 | 1.66447900  | 0.83584500  |
| H  | -8.30013400 | 1.96980800  | 1.53577000  |
| H  | -7.16046500 | 2.54588600  | 0.29149100  |
| H  | -7.93677000 | 0.93519200  | 0.12955300  |
| Cu | 1.61291300  | 2.35519300  | 0.59447100  |
| N  | 2.10935700  | 3.88467900  | 1.61673900  |

|    |             |             |             |
|----|-------------|-------------|-------------|
| C  | 2.43857300  | 4.77884900  | 2.27315200  |
| C  | 2.84635400  | 5.89200000  | 3.09121000  |
| H  | 3.91129300  | 6.09322100  | 2.93963200  |
| H  | 2.27183900  | 6.78330700  | 2.82093800  |
| H  | 2.67326600  | 5.65935800  | 4.14645100  |
| Cu | -1.73903100 | -3.08105900 | -0.59482100 |
| N  | -2.46127700 | -4.78426900 | -0.20048100 |
| C  | -2.90211700 | -5.82246400 | 0.05814700  |
| C  | -3.45328000 | -7.11235000 | 0.38190600  |
| H  | -3.32050100 | -7.31472400 | 1.44922800  |
| H  | -4.52095700 | -7.12913600 | 0.14298200  |
| H  | -2.94500500 | -7.88986600 | -0.19645000 |

### TS<sub>A5</sub>

Number of imaginary frequencies: 1

Lowest frequency (cm<sup>-1</sup>): -460.2

|   |             |             |             |
|---|-------------|-------------|-------------|
| C | -0.23251500 | 1.23022800  | -0.77419100 |
| C | 1.06247200  | 1.08181000  | -0.84227300 |
| N | 1.65436300  | -0.18100400 | -1.00653200 |
| C | 0.65020900  | -1.18682400 | -1.40842100 |
| C | -0.65706700 | -0.83026600 | -0.81025500 |
| C | -1.86321600 | -1.14367000 | -0.60561600 |
| C | -3.25248700 | -1.24856200 | -0.59416800 |
| C | -3.96893000 | -0.89721300 | -1.76350600 |
| C | -3.97165700 | -1.65103700 | 0.56015400  |
| C | -5.34577800 | -0.94338800 | -1.78819200 |
| H | -3.41827900 | -0.59145500 | -2.65045100 |
| C | -5.33974100 | -1.69645700 | 0.53900000  |
| H | -3.42506800 | -1.92097700 | 1.46191800  |
| C | -6.04453200 | -1.34253200 | -0.63343800 |
| H | -5.87743300 | -0.67436200 | -2.69513500 |

|    |             |             |             |
|----|-------------|-------------|-------------|
| H  | -5.91486600 | -2.00154300 | 1.40892100  |
| S  | 2.54200000  | -0.60202800 | 0.40654600  |
| O  | 1.55583900  | -1.05253000 | 1.41273200  |
| O  | 3.37417500  | 0.55313000  | 0.711107500 |
| C  | 3.49516600  | -1.97290400 | -0.12413800 |
| C  | 3.27432100  | -3.22970200 | 0.43322800  |
| C  | 4.47120700  | -1.75286000 | -1.09787000 |
| C  | 4.05397900  | -4.29061400 | -0.00590700 |
| H  | 2.51196300  | -3.36756000 | 1.19598000  |
| C  | 5.23190200  | -2.82858800 | -1.52035800 |
| H  | 4.62156900  | -0.76075300 | -1.51823400 |
| C  | 5.03761400  | -4.10897500 | -0.98320400 |
| H  | 3.89912300  | -5.28127000 | 0.41658500  |
| H  | 5.99405800  | -2.68190300 | -2.28331800 |
| C  | 5.88445600  | -5.25198100 | -1.43938100 |
| H  | 6.08830500  | -5.19582300 | -2.51391100 |
| H  | 6.85555500  | -5.23791500 | -0.92829800 |
| H  | 5.41445200  | -6.21639200 | -1.22438500 |
| H  | 0.55991600  | -1.14079600 | -2.49995800 |
| H  | 0.97558900  | -2.19805400 | -1.14023800 |
| Cu | 2.15642600  | 2.63309200  | -0.50429700 |
| N  | 3.20704700  | 4.17737800  | -0.21614900 |
| C  | 3.91007600  | 5.06931300  | 0.00603100  |
| C  | 4.78740000  | 6.17694300  | 0.28658200  |
| H  | 4.76501900  | 6.89114900  | -0.54218700 |
| H  | 4.46748200  | 6.68174900  | 1.20331600  |
| H  | 5.81062900  | 5.81216400  | 0.41759000  |
| C  | -1.42065500 | 1.99392200  | -0.77046900 |
| C  | -1.85976900 | 2.77017800  | -1.78811400 |
| C  | -2.36325400 | 2.06744400  | 0.41257700  |
| C  | -3.12636400 | 3.46741400  | -1.43160300 |



|    |             |             |             |
|----|-------------|-------------|-------------|
| H  | -1.33182700 | 2.90204300  | -2.73003600 |
| C  | -3.62188200 | 2.70466700  | -0.19019200 |
| H  | -1.91256300 | 2.69160700  | 1.19937400  |
| H  | -2.55334700 | 1.08284500  | 0.86512800  |
| H  | -2.90526600 | 4.52295800  | -1.20452200 |
| H  | -3.84652300 | 3.48659500  | -2.25811100 |
| H  | -4.31499700 | 1.91184400  | -0.50429900 |
| H  | -4.15698700 | 3.34444700  | 0.51641600  |
| O  | -7.36434200 | -1.41609600 | -0.54794200 |
| C  | -8.15876800 | -1.07072900 | -1.68025900 |
| H  | -9.19471000 | -1.22890400 | -1.37970100 |
| H  | -8.01456100 | -0.01827000 | -1.95151900 |
| H  | -7.92560800 | -1.71490700 | -2.53582400 |
| Cu | -0.65399400 | -0.59035900 | 1.21533200  |
| N  | -1.13244900 | -0.39232400 | 3.07840500  |
| C  | -1.31115400 | -0.36796100 | 4.22166600  |
| C  | -1.53352200 | -0.34525200 | 5.64495000  |
| H  | -2.59878200 | -0.21107900 | 5.85582000  |
| H  | -1.19673900 | -1.28896100 | 6.08506100  |
| H  | -0.97182500 | 0.47789900  | 6.09647000  |

## **B5**

|   |             |             |             |
|---|-------------|-------------|-------------|
| C | 0.15256800  | -0.80159400 | -0.27177600 |
| C | -1.18960800 | -0.60629200 | 0.22905400  |
| N | -1.15408300 | 0.49632700  | 0.96741400  |
| C | 0.15660400  | 1.14346100  | 1.03081800  |
| C | 0.99700200  | 0.18616800  | 0.24049500  |
| C | 2.40998800  | 0.17494600  | 0.18883600  |
| C | 3.23569100  | 1.30179800  | 0.03545300  |
| C | 4.62737900  | 1.19534300  | 0.34202600  |
| C | 2.77630900  | 2.54862800  | -0.47977800 |

|   |             |             |             |
|---|-------------|-------------|-------------|
| C | 5.47883400  | 2.25078800  | 0.18589200  |
| H | 4.99426800  | 0.24723500  | 0.73351200  |
| C | 3.62198100  | 3.61362100  | -0.65965600 |
| H | 1.73613400  | 2.64705600  | -0.78261000 |
| C | 4.98711400  | 3.47736300  | -0.31750100 |
| H | 6.53388400  | 2.18776700  | 0.43633600  |
| H | 3.24699000  | 4.54506400  | -1.07202200 |
| S | -2.52722800 | 1.09124500  | 1.90395300  |
| O | -1.89559400 | 1.90747900  | 2.92004000  |
| O | -3.30512900 | -0.09553700 | 2.21001500  |
| C | -3.39101300 | 2.08819100  | 0.74715400  |
| C | -3.02451800 | 3.42513400  | 0.60156200  |
| C | -4.42466400 | 1.52229600  | -0.00017700 |
| C | -3.70839000 | 4.20165500  | -0.32191700 |
| H | -2.23841900 | 3.85343900  | 1.21879800  |
| C | -5.09269400 | 2.31939900  | -0.91554300 |
| H | -4.71542300 | 0.48560200  | 0.15780500  |
| C | -4.74850500 | 3.66586900  | -1.08921900 |
| H | -3.44469000 | 5.25048300  | -0.44260300 |
| H | -5.90900000 | 1.89963300  | -1.50017600 |
| C | -5.50863300 | 4.52148600  | -2.04871500 |
| H | -5.79040600 | 3.96618600  | -2.94942300 |
| H | -6.43853000 | 4.87842900  | -1.58780200 |
| H | -4.93398100 | 5.40304300  | -2.34804100 |
| H | 0.10893500  | 2.14272300  | 0.57327600  |
| H | 0.47652600  | 1.26920600  | 2.07144200  |
| C | 0.57435300  | -1.88645300 | -1.10503700 |
| C | 1.69947600  | -1.88938500 | -1.87800200 |
| C | -0.10152200 | -3.23446200 | -1.15934500 |
| C | 1.92986400  | -3.22603500 | -2.51636100 |
| H | 2.26038200  | -0.99510400 | -2.14445100 |

|    |             |             |             |
|----|-------------|-------------|-------------|
| C  | 0.57112000  | -3.92873600 | -2.35158000 |
| H  | -1.19269700 | -3.14944300 | -1.26800900 |
| H  | 0.07174700  | -3.76970400 | -0.21210600 |
| H  | 2.24743100  | -3.14393400 | -3.56166800 |
| H  | 2.73495100  | -3.76591700 | -1.99311700 |
| H  | 0.66182200  | -5.01033300 | -2.21923200 |
| H  | -0.02780900 | -3.76041800 | -3.25443000 |
| O  | 5.88188500  | 4.43698600  | -0.44172500 |
| C  | 5.48840200  | 5.72274400  | -0.92432300 |
| H  | 6.39316400  | 6.33071800  | -0.92287800 |
| H  | 5.09747100  | 5.65235500  | -1.94520400 |
| H  | 4.74381800  | 6.17520700  | -0.26011700 |
| Cu | -2.76048300 | -1.67668800 | 0.00209700  |
| N  | -4.31975600 | -2.70932200 | -0.26280800 |
| C  | -5.28616200 | -3.33625700 | -0.37527500 |
| C  | -6.48848000 | -4.11682200 | -0.51449100 |
| H  | -7.32765500 | -3.46512600 | -0.77582800 |
| H  | -6.35775500 | -4.86551700 | -1.30186100 |
| H  | -6.71069000 | -4.62387800 | 0.42964500  |
| Cu | 3.15527200  | -1.60458600 | 0.27939200  |
| N  | 3.95669400  | -3.29249900 | 0.69246000  |
| C  | 4.47512600  | -4.27876300 | 1.00696500  |
| C  | 5.12498900  | -5.50229500 | 1.40229700  |
| H  | 5.64655900  | -5.94133700 | 0.54652000  |
| H  | 5.85070500  | -5.29483800 | 2.19452400  |
| H  | 4.38406600  | -6.21533400 | 1.77602100  |

## A6

|   |             |             |            |
|---|-------------|-------------|------------|
| C | -1.07040800 | 2.03293700  | 1.44694500 |
| C | -1.43339600 | 1.01362300  | 0.83271000 |
| N | -1.55597900 | -0.30028200 | 0.54283600 |

|   |             |             |             |
|---|-------------|-------------|-------------|
| C | -0.57936600 | -1.25916400 | 1.09678700  |
| C | 0.78477600  | -0.98662100 | 0.63633300  |
| C | 1.73883200  | -0.35861100 | 0.18077200  |
| C | 2.87449100  | 0.26574100  | -0.39635700 |
| C | 3.09851400  | 0.16762400  | -1.78626400 |
| C | 3.77866000  | 0.99475600  | 0.39103200  |
| C | 4.18419500  | 0.78895300  | -2.36032400 |
| H | 2.39739100  | -0.39989600 | -2.39543900 |
| C | 4.87268600  | 1.62228100  | -0.18146900 |
| H | 3.60994700  | 1.07034700  | 1.46318000  |
| C | 5.07823200  | 1.52620600  | -1.56512700 |
| H | 4.37373900  | 0.73205500  | -3.42888100 |
| H | 5.55839300  | 2.18460000  | 0.44480900  |
| S | -2.31145600 | -0.72552100 | -0.94821600 |
| O | -1.33589900 | -1.41157700 | -1.77508900 |
| O | -2.91131800 | 0.54116100  | -1.39469500 |
| C | -3.56965000 | -1.83888900 | -0.44417300 |
| C | -3.50010900 | -3.16913300 | -0.84681200 |
| C | -4.61546400 | -1.35979300 | 0.34837400  |
| C | -4.50544100 | -4.03653800 | -0.43959900 |
| H | -2.67963400 | -3.51210600 | -1.47172200 |
| C | -5.60244200 | -2.24418500 | 0.74240700  |
| H | -4.65181400 | -0.31476900 | 0.64909200  |
| C | -5.56443100 | -3.59229000 | 0.35536100  |
| H | -4.47168900 | -5.07961700 | -0.74687200 |
| H | -6.42595800 | -1.89195100 | 1.36073000  |
| C | -6.65284600 | -4.52274800 | 0.78065100  |
| H | -6.86871700 | -4.41953900 | 1.85003100  |
| H | -7.58406600 | -4.29719300 | 0.24584900  |
| H | -6.39806600 | -5.56733800 | 0.57897600  |
| H | -0.64012300 | -1.19597100 | 2.18947300  |

|    |             |             |             |
|----|-------------|-------------|-------------|
| H  | -0.91293000 | -2.26741200 | 0.81946000  |
| C  | -0.62671300 | 3.21001100  | 2.09288000  |
| C  | -0.93038200 | 3.55408300  | 3.36112300  |
| C  | 0.34667100  | 4.18942800  | 1.47221800  |
| C  | -0.20532600 | 4.78831000  | 3.77921800  |
| H  | -1.58080400 | 2.97810700  | 4.01492900  |
| C  | 0.30377500  | 5.37296000  | 2.45039800  |
| H  | 0.05952400  | 4.46621400  | 0.44894000  |
| H  | 1.34541600  | 3.73308300  | 1.40455900  |
| H  | -0.84055600 | 5.48016400  | 4.34487500  |
| H  | 0.61988200  | 4.51573500  | 4.45584000  |
| H  | 1.26931000  | 5.87618800  | 2.55118600  |
| H  | -0.41403800 | 6.11793500  | 2.08693900  |
| O  | 6.09251700  | 2.10163600  | -2.21934000 |
| C  | 7.01814300  | 2.88733600  | -1.48638500 |
| H  | 7.73375500  | 3.27415400  | -2.21358500 |
| H  | 6.52031800  | 3.72976800  | -0.98939900 |
| H  | 7.55358400  | 2.28533600  | -0.74134700 |
| Cu | -2.21077800 | 2.39294400  | -0.39740000 |
| N  | -2.80274800 | 3.92002700  | -1.37268300 |
| C  | -3.22107200 | 4.79397000  | -2.00508700 |
| C  | -3.74571500 | 5.88158800  | -2.79059100 |
| H  | -4.81134500 | 6.01068700  | -2.57775700 |
| H  | -3.21601400 | 6.80740700  | -2.54633300 |
| H  | -3.61766000 | 5.66489500  | -3.85561400 |
| Cu | 2.26907100  | -2.64012600 | 0.48948200  |
| N  | 2.31554400  | -3.53932400 | -1.27123200 |
| C  | 2.37185200  | -4.09317300 | -2.28633700 |
| C  | 2.44654600  | -4.78815700 | -3.54807500 |
| H  | 1.71912300  | -4.37127200 | -4.25084400 |
| H  | 3.45085300  | -4.68450800 | -3.96979400 |

|   |            |             |             |
|---|------------|-------------|-------------|
| H | 2.23264500 | -5.85099100 | -3.39933000 |
| N | 3.10694500 | -3.13235500 | 2.21077600  |
| C | 3.64668900 | -3.45679600 | 3.18236900  |
| C | 4.32190600 | -3.86306800 | 4.39038900  |
| H | 4.13756500 | -4.92477500 | 4.58047600  |
| H | 5.39913400 | -3.70362800 | 4.28273400  |
| H | 3.95764600 | -3.27915600 | 5.24081400  |

### TS<sub>A6</sub>

Number of imaginary frequencies: 1

Lowest frequency (cm<sup>-1</sup>): -501.5

|   |             |             |             |
|---|-------------|-------------|-------------|
| C | -0.12259200 | -0.07499400 | 0.92588000  |
| C | 1.12045900  | -0.20692200 | 0.54522600  |
| N | 1.48965200  | 0.07792000  | -0.74498900 |
| C | 0.48635000  | 0.76946900  | -1.56714100 |
| C | -0.82697000 | 0.47785000  | -0.96361900 |
| C | -2.08672100 | 0.64400500  | -0.95746400 |
| C | -3.32784400 | 1.16864300  | -0.58371500 |
| C | -3.35601100 | 2.42940800  | 0.06023500  |
| C | -4.54921500 | 0.48579800  | -0.80731700 |
| C | -4.54759800 | 2.99473200  | 0.46086700  |
| H | -2.41889900 | 2.95578300  | 0.22962200  |
| C | -5.73594000 | 1.04341300  | -0.41006800 |
| H | -4.53025600 | -0.48453600 | -1.29903200 |
| C | -5.75075700 | 2.30589600  | 0.22306100  |
| H | -4.54891600 | 3.96592000  | 0.94505500  |
| H | -6.68759300 | 0.54553100  | -0.57357900 |
| S | 3.04637500  | -0.19356900 | -1.34033800 |
| O | 2.86024400  | -0.52715400 | -2.74541800 |
| O | 3.65208700  | -1.14430000 | -0.41309600 |
| C | 3.87074100  | 1.35677800  | -1.21924000 |

|    |             |             |             |
|----|-------------|-------------|-------------|
| C  | 3.88742000  | 2.20465200  | -2.32364500 |
| C  | 4.45006700  | 1.72557300  | -0.00402500 |
| C  | 4.50021300  | 3.44480400  | -2.20192300 |
| H  | 3.44567900  | 1.88756200  | -3.26526400 |
| C  | 5.05408100  | 2.96791800  | 0.09339700  |
| H  | 4.44637500  | 1.04054400  | 0.84157200  |
| C  | 5.08973700  | 3.84431100  | -0.99984700 |
| H  | 4.52958500  | 4.11518000  | -3.05861500 |
| H  | 5.52112000  | 3.26860900  | 1.02981400  |
| C  | 5.77037200  | 5.16974600  | -0.87901700 |
| H  | 5.56163200  | 5.81162400  | -1.73992900 |
| H  | 5.45818800  | 5.69832200  | 0.02888000  |
| H  | 6.85817000  | 5.04247600  | -0.81458500 |
| H  | 0.65133800  | 1.85813400  | -1.54255400 |
| H  | 0.55002500  | 0.42467900  | -2.60502800 |
| Cu | 2.30655700  | -1.04083500 | 1.81949700  |
| N  | 3.41646000  | -1.82203700 | 3.13700200  |
| C  | 4.13024900  | -2.29679800 | 3.91439700  |
| C  | 5.01791300  | -2.88799700 | 4.88313700  |
| H  | 6.05538700  | -2.76627200 | 4.55751200  |
| H  | 4.88726800  | -2.40097800 | 5.85422700  |
| H  | 4.79862500  | -3.95515300 | 4.98517000  |
| C  | -1.17764100 | -0.05110000 | 1.86835200  |
| C  | -1.40476900 | 0.94335400  | 2.75679500  |
| C  | -2.23469100 | -1.12778500 | 1.98388900  |
| C  | -2.60251800 | 0.67062100  | 3.59883600  |
| H  | -0.76542300 | 1.81662300  | 2.86776800  |
| C  | -3.31719700 | -0.47049100 | 2.85227600  |
| H  | -1.80218100 | -2.02238400 | 2.45558100  |
| H  | -2.61013300 | -1.44600100 | 0.99788900  |
| H  | -2.28299900 | 0.37166300  | 4.60960400  |

|    |             |             |             |
|----|-------------|-------------|-------------|
| H  | -3.22805800 | 1.56176200  | 3.73527000  |
| H  | -4.09652800 | -0.04563300 | 2.20565500  |
| H  | -3.80791800 | -1.17583300 | 3.52832600  |
| O  | -6.95069800 | 2.75957600  | 0.55807100  |
| C  | -7.06544900 | 4.04514100  | 1.16185200  |
| H  | -8.13133000 | 4.20557800  | 1.32669700  |
| H  | -6.53987000 | 4.07782900  | 2.12361400  |
| H  | -6.67985200 | 4.82599700  | 0.49569300  |
| Cu | -1.64723000 | -1.37359900 | -1.35991100 |
| N  | -3.15625000 | -2.68576700 | -1.50838600 |
| C  | -3.89789900 | -3.56200300 | -1.65855700 |
| N  | -0.07086800 | -2.47921700 | -1.97426400 |
| C  | 0.88960200  | -3.02194300 | -2.32661800 |
| C  | -4.82254600 | -4.65243100 | -1.84666300 |
| H  | -5.00473000 | -5.15508400 | -0.89189300 |
| H  | -5.77163300 | -4.27432800 | -2.23790200 |
| H  | -4.40677400 | -5.37382000 | -2.55642600 |
| C  | 2.09608900  | -3.68288600 | -2.75899700 |
| H  | 1.87523100  | -4.37227700 | -3.57899800 |
| H  | 2.81291400  | -2.92550600 | -3.09563600 |
| H  | 2.53146000  | -4.24217300 | -1.92516800 |

## **B6**

|   |             |             |             |
|---|-------------|-------------|-------------|
| C | 0.15340000  | -0.78323400 | 0.26496700  |
| C | 1.53896100  | -0.75643900 | -0.12201900 |
| N | 1.69227100  | 0.32864500  | -0.88102800 |
| C | 0.47655400  | 1.12545300  | -1.05265800 |
| C | -0.53038500 | 0.28926900  | -0.32007700 |
| C | -1.92544100 | 0.45670400  | -0.37474700 |
| C | -2.60342300 | 1.68531900  | -0.24712100 |
| C | -3.94064100 | 1.80722000  | -0.72747100 |



|   |             |             |             |
|---|-------------|-------------|-------------|
| C | -2.03601600 | 2.82042500  | 0.39798800  |
| C | -4.63406700 | 2.98064500  | -0.61994400 |
| H | -4.39583300 | 0.94366600  | -1.20918200 |
| C | -2.73213800 | 3.99600700  | 0.54330000  |
| H | -1.03955600 | 2.74208600  | 0.82887000  |
| C | -4.03932300 | 4.09164200  | 0.01940300  |
| H | -5.64187700 | 3.09419100  | -1.00935000 |
| H | -2.27905100 | 4.83518300  | 1.06159600  |
| S | 3.18101100  | 0.77220000  | -1.69358100 |
| O | 2.73984900  | 1.30300500  | -2.96755200 |
| O | 4.02876200  | -0.40188600 | -1.58227900 |
| C | 3.78564700  | 2.06339700  | -0.67003900 |
| C | 3.50419800  | 3.38337100  | -1.01461700 |
| C | 4.50688300  | 1.73572000  | 0.47821000  |
| C | 3.96464700  | 4.39499200  | -0.18370100 |
| H | 2.95502900  | 3.60684300  | -1.92660800 |
| C | 4.95367900  | 2.76343000  | 1.29173300  |
| H | 4.72392500  | 0.69618700  | 0.71489900  |
| C | 4.69358600  | 4.10326300  | 0.97359000  |
| H | 3.76698600  | 5.43400700  | -0.43993800 |
| H | 5.52604900  | 2.53054000  | 2.18779600  |
| C | 5.21762200  | 5.19892700  | 1.84368200  |
| H | 5.14770000  | 4.93885500  | 2.90528200  |
| H | 6.27795900  | 5.38462200  | 1.62965100  |
| H | 4.68231600  | 6.13896000  | 1.67922800  |
| H | 0.60511900  | 2.11742200  | -0.59393200 |
| H | 0.25423800  | 1.27087700  | -2.11618200 |
| C | -0.48287200 | -1.79481000 | 1.05051400  |
| C | -1.67731200 | -1.64312000 | 1.69549000  |
| C | -0.00740900 | -3.22139200 | 1.15129800  |
| C | -2.15883300 | -2.93952100 | 2.27890000  |

|    |             |             |             |
|----|-------------|-------------|-------------|
| H  | -2.12738800 | -0.67912800 | 1.93011600  |
| C  | -0.90049500 | -3.82546500 | 2.24472500  |
| H  | 1.06617000  | -3.28990100 | 1.38008500  |
| H  | -0.14093600 | -3.71944100 | 0.17749900  |
| H  | -2.57094400 | -2.81990400 | 3.28736200  |
| H  | -2.96921400 | -3.36045700 | 1.66310600  |
| H  | -1.12599400 | -4.88204400 | 2.07384200  |
| H  | -0.38743700 | -3.75544500 | 3.21135900  |
| O  | -4.79081200 | 5.17645500  | 0.08781500  |
| C  | -4.28352100 | 6.35598200  | 0.71050100  |
| H  | -5.07669800 | 7.09993400  | 0.63142400  |
| H  | -4.05877200 | 6.17470000  | 1.76748600  |
| H  | -3.39098800 | 6.72078600  | 0.18989000  |
| Cu | 2.94615500  | -2.00110300 | 0.25507900  |
| N  | 4.31084600  | -3.24233000 | 0.66839100  |
| C  | 5.19171500  | -3.97159300 | 0.84609900  |
| C  | 6.28818700  | -4.87923800 | 1.06803800  |
| H  | 7.18234000  | -4.31653800 | 1.35356000  |
| H  | 6.03540100  | -5.58178700 | 1.86739400  |
| H  | 6.49735800  | -5.43763700 | 0.15030500  |
| Cu | -2.89200400 | -1.25509200 | -0.44598200 |
| N  | -2.97177600 | -3.05172000 | -1.35651200 |
| C  | -3.07880200 | -4.03736000 | -1.95471400 |
| C  | -3.21639800 | -5.26334800 | -2.70357500 |
| H  | -4.23990300 | -5.35655800 | -3.07867800 |
| H  | -2.52564000 | -5.26241700 | -3.55207900 |
| H  | -2.99272200 | -6.12198800 | -2.06363700 |
| N  | -4.85763500 | -1.34359600 | 0.46245600  |
| C  | -5.90767700 | -1.38639400 | 0.95020400  |
| C  | -7.21820700 | -1.44232500 | 1.55541500  |
| H  | -7.98890300 | -1.31170200 | 0.78988700  |

|   |             |             |            |
|---|-------------|-------------|------------|
| H | -7.36469500 | -2.41144500 | 2.04173200 |
| H | -7.32164600 | -0.65075900 | 2.30343800 |

### A7

|   |             |             |             |
|---|-------------|-------------|-------------|
| C | 0.96582600  | -2.67200000 | 1.31941000  |
| C | 1.45407400  | -1.62079100 | 0.86451200  |
| N | 1.67895700  | -0.28608300 | 0.77510400  |
| C | 0.75135000  | 0.64380900  | 1.44919500  |
| C | -0.61955300 | 0.57389800  | 0.93421200  |
| C | -1.69617000 | 0.13795000  | 0.53246100  |
| C | -2.96540700 | -0.33349900 | 0.09656400  |
| C | -3.31124000 | -0.30716200 | -1.26807900 |
| C | -3.90633400 | -0.79163100 | 1.02793900  |
| C | -4.55828200 | -0.72615800 | -1.67810000 |
| H | -2.58466700 | 0.05579900  | -1.99237400 |
| C | -5.16339100 | -1.21647100 | 0.62165900  |
| H | -3.64646700 | -0.80861800 | 2.08421700  |
| C | -5.49629200 | -1.18343100 | -0.73812100 |
| H | -4.84526900 | -0.71680900 | -2.72637100 |
| H | -5.87267000 | -1.57501200 | 1.36157700  |
| S | 2.37208100  | 0.25507700  | -0.70933400 |
| O | 1.32556100  | 0.74815300  | -1.58713800 |
| O | 3.19628900  | -0.88998200 | -1.12663700 |
| C | 3.39073900  | 1.58139800  | -0.18166600 |
| C | 3.00689700  | 2.88369500  | -0.48984800 |
| C | 4.55613800  | 1.30159200  | 0.53416200  |
| C | 3.82266300  | 3.92787300  | -0.07315600 |
| H | 2.08893700  | 3.06886000  | -1.04480500 |
| C | 5.34974600  | 2.35962500  | 0.93954900  |
| H | 4.83421300  | 0.27454600  | 0.75981800  |
| C | 5.00002300  | 3.68446400  | 0.63945500  |

|    |             |             |             |
|----|-------------|-------------|-------------|
| H  | 3.55110000  | 4.95369100  | -0.31557800 |
| H  | 6.26557900  | 2.16333000  | 1.49396300  |
| C  | 5.88910600  | 4.80661500  | 1.06731500  |
| H  | 6.15206600  | 4.72319700  | 2.12804300  |
| H  | 6.83172200  | 4.78825800  | 0.50650300  |
| H  | 5.42333600  | 5.78283300  | 0.90209000  |
| H  | 0.76544100  | 0.38996600  | 2.51589300  |
| H  | 1.17743600  | 1.65178100  | 1.35764600  |
| C  | 0.35921400  | -3.87416000 | 1.74514500  |
| C  | 0.57395200  | -4.46763900 | 2.93775100  |
| C  | -0.71377800 | -4.59407500 | 0.95515400  |
| C  | -0.31893500 | -5.64703400 | 3.12583500  |
| H  | 1.27053800  | -4.10238500 | 3.68849600  |
| C  | -0.84495000 | -5.92636000 | 1.70761900  |
| H  | -0.44057400 | -4.71990600 | -0.10037900 |
| H  | -1.64425700 | -4.00762200 | 0.97202700  |
| H  | 0.19784700  | -6.50212600 | 3.57724800  |
| H  | -1.12877000 | -5.38156100 | 3.82368400  |
| H  | -1.86547100 | -6.31890100 | 1.70230000  |
| H  | -0.20474500 | -6.67780500 | 1.23005700  |
| O  | -6.68128800 | -1.56227500 | -1.23849600 |
| C  | -7.67724300 | -2.02211300 | -0.34286800 |
| H  | -8.54199600 | -2.28601600 | -0.95435500 |
| H  | -7.34401600 | -2.91115500 | 0.20778300  |
| H  | -7.96852200 | -1.23836500 | 0.36935900  |
| Cu | 2.42226200  | -2.85566200 | -0.37152100 |
| N  | 3.16596800  | -4.28320200 | -1.40166100 |
| C  | 3.66004800  | -5.09522100 | -2.06118500 |
| C  | 4.27689600  | -6.10411600 | -2.88435200 |
| H  | 5.33827400  | -6.18881700 | -2.63224000 |
| H  | 3.79072100  | -7.07019400 | -2.71840000 |

|    |             |             |             |
|----|-------------|-------------|-------------|
| H  | 4.18109900  | -5.83043700 | -3.93939800 |
| Cu | -1.42795700 | 2.44505300  | 0.15312500  |
| N  | -1.22545400 | 2.75239700  | -1.92108500 |
| C  | -1.05371700 | 2.92838700  | -3.05262400 |
| C  | -0.83981900 | 3.14191300  | -4.46566800 |
| H  | -0.11257600 | 2.41853600  | -4.84634400 |
| H  | -1.78127200 | 3.02040200  | -5.00931300 |
| H  | -0.45992400 | 4.15303300  | -4.63877800 |
| N  | -3.42253100 | 2.91113100  | 0.46339100  |
| C  | -4.57823500 | 2.90412700  | 0.53754400  |
| C  | -6.01922800 | 2.87855900  | 0.63366600  |
| H  | -6.41072400 | 3.89383600  | 0.74499600  |
| H  | -6.44251500 | 2.43041500  | -0.27047100 |
| H  | -6.32093300 | 2.28173200  | 1.49995000  |
| N  | -0.26955000 | 3.89086200  | 1.02886500  |
| C  | 0.13753500  | 4.82627100  | 1.57791300  |
| C  | 0.64085300  | 5.99438100  | 2.26101300  |
| H  | 0.41470300  | 6.89317200  | 1.67931100  |
| H  | 0.16913800  | 6.08339100  | 3.24428400  |
| H  | 1.72394800  | 5.91632900  | 2.39385000  |

### TS<sub>A7</sub>

Number of imaginary frequencies: 1

Lowest frequency (cm<sup>-1</sup>): -477.4

|   |             |             |             |
|---|-------------|-------------|-------------|
| C | 0.14204200  | -1.01765000 | -0.55174200 |
| C | 1.30856300  | -0.44147400 | -0.47566900 |
| N | 1.51513700  | 0.64145700  | 0.34609100  |
| C | 0.46308000  | 0.89309000  | 1.34545600  |
| C | -0.77597100 | 0.31201200  | 0.80533500  |
| C | -2.00729100 | 0.05399800  | 0.89114500  |

|    |             |             |             |
|----|-------------|-------------|-------------|
| C  | -3.19774100 | -0.65905500 | 1.08187900  |
| C  | -3.14045900 | -1.90124200 | 1.75462700  |
| C  | -4.44579300 | -0.19652000 | 0.60064900  |
| C  | -4.27980100 | -2.65742200 | 1.94606800  |
| H  | -2.18084100 | -2.25708900 | 2.12410400  |
| C  | -5.58093400 | -0.94049300 | 0.79545800  |
| H  | -4.49173500 | 0.75817800  | 0.08007400  |
| C  | -5.51198500 | -2.17706000 | 1.47181600  |
| H  | -4.21876200 | -3.60813300 | 2.46676100  |
| H  | -6.55207900 | -0.60309500 | 0.44444700  |
| S  | 2.99125000  | 1.45549300  | 0.40422900  |
| O  | 2.67076900  | 2.77002000  | 0.93812900  |
| O  | 3.57380900  | 1.30581100  | -0.92575100 |
| C  | 3.97758400  | 0.57054500  | 1.56617400  |
| C  | 4.00907600  | 0.99699500  | 2.89144500  |
| C  | 4.67211600  | -0.56555900 | 1.14828700  |
| C  | 4.75280400  | 0.26804700  | 3.80938200  |
| H  | 3.47554700  | 1.89644200  | 3.18986500  |
| C  | 5.40416600  | -1.28001100 | 2.08377500  |
| H  | 4.65489700  | -0.87268300 | 0.10217800  |
| C  | 5.45856300  | -0.87521100 | 3.42328900  |
| H  | 4.79404300  | 0.59465500  | 4.84664800  |
| H  | 5.95791600  | -2.16498200 | 1.77477800  |
| C  | 6.28387400  | -1.63362100 | 4.41259800  |
| H  | 5.90808900  | -1.50776900 | 5.43288000  |
| H  | 6.30846400  | -2.70378200 | 4.18241600  |
| H  | 7.32187300  | -1.27739900 | 4.40287500  |
| H  | 0.70708500  | 0.39204200  | 2.29602800  |
| H  | 0.35605400  | 1.96879300  | 1.52605600  |
| Cu | 2.68582400  | -1.18471800 | -1.60071700 |
| N  | 4.08309400  | -1.88017800 | -2.67430900 |

|    |             |             |             |
|----|-------------|-------------|-------------|
| C  | 4.96854900  | -2.22411000 | -3.33547500 |
| C  | 6.07280400  | -2.64843400 | -4.15781500 |
| H  | 6.26851400  | -3.71341600 | -4.00012700 |
| H  | 5.83622200  | -2.48036600 | -5.21295500 |
| H  | 6.96900100  | -2.07672700 | -3.89753900 |
| C  | -0.78459000 | -1.99452400 | -0.98069700 |
| C  | -0.80034700 | -3.28092400 | -0.56273100 |
| C  | -1.89927700 | -1.73552500 | -1.97163400 |
| C  | -1.88336800 | -4.06197100 | -1.22468000 |
| H  | -0.08059900 | -3.70173700 | 0.13675600  |
| C  | -2.79382800 | -2.97359600 | -1.81988300 |
| H  | -1.47732100 | -1.63941800 | -2.98298900 |
| H  | -2.43085500 | -0.79662500 | -1.76252400 |
| H  | -1.44902700 | -4.71168800 | -2.00094600 |
| H  | -2.40129500 | -4.73405700 | -0.52840100 |
| H  | -3.59941600 | -2.75114500 | -1.10662000 |
| H  | -3.26420700 | -3.28087300 | -2.75812000 |
| O  | -6.66900800 | -2.81472400 | 1.61385700  |
| C  | -6.69293700 | -4.06080300 | 2.30046000  |
| H  | -7.73748500 | -4.37378400 | 2.32097100  |
| H  | -6.10022600 | -4.81550500 | 1.76972700  |
| H  | -6.32715700 | -3.95329800 | 3.32864400  |
| Cu | -1.77724800 | 1.69434000  | -0.51024300 |
| N  | -3.20396000 | 1.87915500  | -1.96123100 |
| C  | -3.91250200 | 2.09763500  | -2.85038800 |
| N  | -0.21469800 | 2.79783000  | -1.22703700 |
| C  | 0.70654700  | 3.43935600  | -1.51028800 |
| C  | -4.79446400 | 2.37521400  | -3.95867700 |
| H  | -4.50073700 | 1.78059400  | -4.82885800 |
| H  | -5.82609900 | 2.12853700  | -3.69074200 |
| H  | -4.73975700 | 3.43633400  | -4.21959600 |

|   |             |            |             |
|---|-------------|------------|-------------|
| C | 1.85998600  | 4.23256600 | -1.86224900 |
| H | 1.65124800  | 4.82029700 | -2.76097600 |
| H | 2.10991600  | 4.90526200 | -1.03673800 |
| H | 2.71418100  | 3.57248900 | -2.04598400 |
| N | -2.57664200 | 3.20153300 | 0.96211700  |
| C | -3.03562800 | 3.99711300 | 1.66855500  |
| C | -3.61093600 | 4.98831400 | 2.54867800  |
| H | -2.85443900 | 5.35382400 | 3.24918200  |
| H | -3.98850000 | 5.83291400 | 1.96487300  |
| H | -4.43772600 | 4.55079000 | 3.11583800  |

### **B7**

|   |             |             |             |
|---|-------------|-------------|-------------|
| C | -0.32319800 | -0.52728700 | -0.46616600 |
| C | -1.64646900 | -0.49972500 | 0.08009900  |
| N | -1.67083800 | 0.47991600  | 0.99157000  |
| C | -0.40342400 | 1.19555500  | 1.12359500  |
| C | 0.47034200  | 0.42640200  | 0.17912900  |
| C | 1.86624800  | 0.59360500  | 0.11192800  |
| C | 2.52233000  | 1.80472400  | -0.16644200 |
| C | 3.91821500  | 1.93400500  | 0.10264800  |
| C | 1.86364900  | 2.91733700  | -0.76476300 |
| C | 4.58805200  | 3.09541000  | -0.16227200 |
| H | 4.43155200  | 1.08307700  | 0.54832300  |
| C | 2.52777900  | 4.08328300  | -1.05471200 |
| H | 0.81186500  | 2.82409900  | -1.03022600 |
| C | 3.90101000  | 4.18684100  | -0.74092800 |
| H | 5.64552900  | 3.21652300  | 0.05532900  |
| H | 2.00363300  | 4.90764400  | -1.52781400 |
| S | -3.04047400 | 0.85677700  | 2.00145300  |
| O | -2.46296400 | 1.66675100  | 3.05632600  |
| O | -3.70550600 | -0.40798700 | 2.25668800  |



|   |             |             |             |
|---|-------------|-------------|-------------|
| C | -4.04352100 | 1.84449200  | 0.94664300  |
| C | -3.80760200 | 3.21739200  | 0.87914700  |
| C | -5.04156700 | 1.23362000  | 0.19062600  |
| C | -4.59223300 | 3.98317300  | 0.03211700  |
| H | -3.04143400 | 3.67678800  | 1.49954500  |
| C | -5.81518500 | 2.02225400  | -0.64973900 |
| H | -5.22116800 | 0.16348800  | 0.27981700  |
| C | -5.60506100 | 3.40150200  | -0.74124000 |
| H | -4.43156100 | 5.05823100  | -0.02582700 |
| H | -6.60778500 | 1.56431500  | -1.23828300 |
| C | -6.45601300 | 4.25516800  | -1.62501200 |
| H | -7.10059200 | 3.65400100  | -2.27314100 |
| H | -7.10111900 | 4.90964700  | -1.02584200 |
| H | -5.84312100 | 4.90718200  | -2.25795200 |
| H | -0.51109600 | 2.24465900  | 0.80913100  |
| H | -0.06135000 | 1.19297800  | 2.16413900  |
| C | 0.15690600  | -1.44346600 | -1.46589400 |
| C | 1.31374000  | -1.30855900 | -2.15233100 |
| C | -0.48828500 | -2.77583500 | -1.75776000 |
| C | 1.65786900  | -2.54459800 | -2.92067800 |
| H | 1.91719300  | -0.40292700 | -2.17567900 |
| C | 0.33388200  | -3.32919100 | -2.93459400 |
| H | -1.55760400 | -2.67919800 | -2.00268900 |
| H | -0.43721000 | -3.41945300 | -0.86326400 |
| H | 2.04070800  | -2.33873600 | -3.92735000 |
| H | 2.45541300  | -3.09166600 | -2.39097200 |
| H | 0.47925000  | -4.41284100 | -2.87913300 |
| H | -0.19439400 | -3.12650900 | -3.87369500 |
| O | 4.63236800  | 5.26488000  | -0.96071900 |
| C | 4.02937900  | 6.42828100  | -1.52535800 |
| H | 4.82155200  | 7.17481400  | -1.58765500 |

|    |             |             |             |
|----|-------------|-------------|-------------|
| H  | 3.64486400  | 6.22218500  | -2.53062700 |
| H  | 3.22594400  | 6.80258900  | -0.88129700 |
| Cu | -3.12812700 | -1.66367000 | -0.26638900 |
| N  | -4.63395700 | -2.76501900 | -0.56588000 |
| C  | -5.56512300 | -3.43878600 | -0.70238600 |
| C  | -6.72153100 | -4.28057800 | -0.87391700 |
| H  | -6.77106800 | -4.64020900 | -1.90594300 |
| H  | -6.65876500 | -5.13781800 | -0.19672300 |
| H  | -7.63041600 | -3.71518000 | -0.64623000 |
| Cu | 2.90765500  | -1.05895700 | 0.43424100  |
| N  | 2.31139300  | -3.04680200 | 0.66363300  |
| C  | 1.96396300  | -4.14747600 | 0.75852700  |
| C  | 1.51995900  | -5.51914200 | 0.86408600  |
| H  | 1.35099600  | -5.93495200 | -0.13422300 |
| H  | 2.27724500  | -6.12249100 | 1.37322200  |
| H  | 0.58717400  | -5.56798000 | 1.43383100  |
| N  | 4.58575400  | -1.42911400 | -0.88383300 |
| C  | 5.50430100  | -1.62820900 | -1.56108900 |
| C  | 6.65079700  | -1.88069600 | -2.40410600 |
| H  | 7.57241800  | -1.65707500 | -1.85846600 |
| H  | 6.66760300  | -2.93090500 | -2.70945200 |
| H  | 6.60815900  | -1.25203900 | -3.29820400 |
| N  | 4.08537500  | -1.00328200 | 2.28346900  |
| C  | 4.60996500  | -1.02093200 | 3.31634300  |
| C  | 5.26347100  | -1.04592900 | 4.60535600  |
| H  | 6.00703700  | -0.24571400 | 4.66639800  |
| H  | 4.52578800  | -0.90652800 | 5.40113400  |
| H  | 5.76488500  | -2.00708900 | 4.75262400  |

**J**

|   |             |             |             |
|---|-------------|-------------|-------------|
| C | -1.81938300 | -0.31029700 | -2.08230300 |
|---|-------------|-------------|-------------|

|   |             |             |             |
|---|-------------|-------------|-------------|
| C | -2.66842200 | 0.42478400  | -1.22327200 |
| N | -1.85025700 | 1.30994800  | -0.60341000 |
| C | -0.43471700 | 1.21092800  | -1.00501200 |
| C | -0.51342300 | 0.12095400  | -2.00023200 |
| C | 0.37090400  | -0.66465800 | -2.83391800 |
| C | 1.83014300  | -0.56032900 | -2.88505000 |
| C | 2.53351400  | 0.31949100  | -2.04412800 |
| C | 2.58440200  | -1.33857300 | -3.77237500 |
| C | 3.91687400  | 0.39593500  | -2.07601700 |
| H | 2.01354900  | 0.97672600  | -1.34931200 |
| C | 3.97177100  | -1.27615900 | -3.81200100 |
| H | 2.08330800  | -2.00122000 | -4.47292600 |
| C | 4.65123400  | -0.40628100 | -2.95757800 |
| H | 4.45454400  | 1.09724400  | -1.43992900 |
| H | 4.50973500  | -1.89403600 | -4.52474500 |
| S | -2.36958100 | 2.52231600  | 0.50598900  |
| O | -1.29252700 | 2.59032200  | 1.48143700  |
| O | -3.72256600 | 2.13995600  | 0.88266000  |
| C | -2.39039500 | 3.99324500  | -0.45133500 |
| C | -1.26921700 | 4.82237800  | -0.43472400 |
| C | -3.51751500 | 4.28683100  | -1.21698500 |
| C | -1.29250200 | 5.97508700  | -1.20447400 |
| H | -0.40923600 | 4.56954700  | 0.18193900  |
| C | -3.51467600 | 5.44550100  | -1.97779100 |
| H | -4.38330600 | 3.62827000  | -1.20383600 |
| C | -2.40965500 | 6.30500100  | -1.98034100 |
| H | -0.43157300 | 6.64100500  | -1.19948900 |
| H | -4.38729000 | 5.69949000  | -2.57633300 |
| C | -2.42943700 | 7.57122900  | -2.77377200 |
| H | -3.16908500 | 7.53305600  | -3.57920100 |
| H | -2.68754900 | 8.42331900  | -2.13194300 |

|    |             |             |             |
|----|-------------|-------------|-------------|
| H  | -1.44887100 | 7.78608800  | -3.21159400 |
| H  | 0.17981500  | 0.95704700  | -0.12894000 |
| H  | -0.05470300 | 2.16637800  | -1.39352300 |
| Cu | -4.49662900 | 0.20147400  | -0.70275900 |
| N  | -6.33021200 | -0.02326700 | -0.28658200 |
| C  | -7.41834100 | -0.15179000 | 0.08561200  |
| C  | -8.77013200 | -0.30692500 | 0.56071600  |
| H  | -8.79647700 | -0.13317400 | 1.64078800  |
| H  | -9.42696600 | 0.41341400  | 0.06388300  |
| H  | -9.12632000 | -1.31949300 | 0.34721500  |
| C  | -1.89453800 | -1.39534300 | -3.08695500 |
| C  | -0.45076200 | -1.58407200 | -3.44759100 |
| C  | -2.32804000 | -2.83226700 | -2.78934800 |
| C  | -0.26134800 | -2.90806000 | -4.10955200 |
| C  | -1.62671600 | -3.60912300 | -3.91561200 |
| H  | -3.41448300 | -2.96552300 | -2.77919700 |
| H  | -1.94200800 | -3.12931500 | -1.80201100 |
| H  | 0.02007500  | -2.82963500 | -5.16878400 |
| H  | 0.55800100  | -3.45558100 | -3.61801600 |
| H  | -1.52198000 | -4.67718600 | -3.69720400 |
| H  | -2.21925100 | -3.52766400 | -4.83528700 |
| O  | 5.99587700  | -0.26371600 | -2.92455800 |
| C  | 6.74731800  | -0.94767900 | -3.91179800 |
| H  | 6.41406800  | -0.68075200 | -4.92285000 |
| H  | 7.78561500  | -0.63020200 | -3.79423900 |
| H  | 6.68474300  | -2.03761300 | -3.78611500 |
| C  | 1.08345400  | -1.86794700 | 1.22729800  |
| C  | 2.07204600  | -0.86548700 | 1.34875500  |
| N  | 1.47503300  | 0.13382900  | 2.04466700  |
| C  | 0.06259800  | -0.14130600 | 2.39800200  |
| C  | -0.11514100 | -1.47404500 | 1.78615100  |

|    |             |             |            |
|----|-------------|-------------|------------|
| C  | -1.13653300 | -2.48911700 | 1.62406600 |
| C  | -2.56779400 | -2.35777000 | 1.90369800 |
| C  | -3.17490700 | -1.10305200 | 2.08429400 |
| C  | -3.39308600 | -3.48655000 | 1.96356200 |
| C  | -4.53798000 | -0.98440000 | 2.29133700 |
| H  | -2.58399900 | -0.18961000 | 2.05852500 |
| C  | -4.76452100 | -3.38478800 | 2.16793800 |
| H  | -2.95514700 | -4.47775800 | 1.87176000 |
| C  | -5.34672900 | -2.12624500 | 2.32829900 |
| H  | -4.99866600 | -0.00994000 | 2.43792800 |
| H  | -5.36464000 | -4.28896100 | 2.21200300 |
| S  | 2.06183600  | 1.75987700  | 2.13634800 |
| O  | 1.30330400  | 2.33994300  | 3.22700000 |
| O  | 1.99419800  | 2.32268900  | 0.79182200 |
| C  | 3.75252900  | 1.52564900  | 2.57186500 |
| C  | 4.06479200  | 0.89582200  | 3.77775000 |
| C  | 4.74153600  | 2.00512100  | 1.71870600 |
| C  | 5.39743000  | 0.72839200  | 4.11206900 |
| H  | 3.27690000  | 0.53718700  | 4.43719100 |
| C  | 6.07262900  | 1.83953900  | 2.08285600 |
| H  | 4.46850800  | 2.51221700  | 0.79605000 |
| C  | 6.41974900  | 1.19588900  | 3.27270500 |
| H  | 5.66039100  | 0.23301600  | 5.04515400 |
| H  | 6.85859900  | 2.21760600  | 1.43088200 |
| C  | 7.85125800  | 1.01162000  | 3.66182600 |
| H  | 8.06143500  | -0.03225900 | 3.92316500 |
| H  | 8.53176400  | 1.31169100  | 2.85886500 |
| H  | 8.09632000  | 1.61231000  | 4.54638200 |
| H  | -0.57911500 | 0.66645600  | 2.02058200 |
| H  | -0.06190800 | -0.15681300 | 3.48968900 |
| Cu | 3.86125300  | -0.88483200 | 0.66159100 |

|   |             |             |             |
|---|-------------|-------------|-------------|
| N | 5.69922700  | -1.08513100 | 0.19809200  |
| C | 6.79510000  | -1.08107900 | -0.17380200 |
| C | 8.16832000  | -1.05809700 | -0.61308400 |
| H | 8.33202300  | -0.18608000 | -1.25444000 |
| H | 8.83522200  | -1.00067100 | 0.25289900  |
| H | 8.39897900  | -1.96845200 | -1.17513100 |
| C | 0.95242000  | -3.26526300 | 0.74940200  |
| C | -0.49661100 | -3.54315300 | 1.01426500  |
| C | 1.05442300  | -3.67710400 | -0.72200900 |
| C | -0.93836500 | -4.74278000 | 0.24918400  |
| C | 0.21204900  | -4.96390900 | -0.76638300 |
| H | 2.08519500  | -3.81543300 | -1.06884800 |
| H | 0.59338400  | -2.88826400 | -1.33538500 |
| H | -1.08934000 | -5.62104800 | 0.89230400  |
| H | -1.90835900 | -4.55610500 | -0.23374100 |
| H | -0.16054900 | -5.18686700 | -1.77333500 |
| H | 0.82545900  | -5.81909700 | -0.45757300 |
| O | -6.66715200 | -1.91413000 | 2.52848100  |
| C | -7.49880900 | -3.04862100 | 2.68488700  |
| H | -7.17382200 | -3.67207300 | 3.52801200  |
| H | -8.50285400 | -2.67454100 | 2.89736600  |
| H | -7.52723800 | -3.66141100 | 1.77277800  |
| H | 1.58298300  | -3.93905300 | 1.35686700  |
| H | -2.44247400 | -1.04888400 | -3.98273800 |

### TS<sub>j</sub>

Number of imaginary frequencies: 1

Lowest frequency (cm<sup>-1</sup>): -590.8

|   |             |             |             |
|---|-------------|-------------|-------------|
| C | -0.62170800 | -2.55492700 | 0.68697900  |
| C | -1.48283400 | -1.80652400 | -0.09922600 |
| N | -0.65385100 | -1.30991700 | -1.12166000 |

|   |             |             |             |
|---|-------------|-------------|-------------|
| C | 0.68786400  | -1.69826300 | -0.97307400 |
| C | 0.70023100  | -2.49752800 | 0.18564000  |
| C | 1.63310900  | -3.11098100 | 1.11439700  |
| C | 3.08611200  | -2.95320500 | 1.01692000  |
| C | 3.69294700  | -2.73720000 | -0.23427000 |
| C | 3.91189900  | -2.94932500 | 2.14521000  |
| C | 5.05229200  | -2.50787300 | -0.34659700 |
| H | 3.09390300  | -2.78927300 | -1.14078700 |
| C | 5.27938000  | -2.70895600 | 2.04965700  |
| H | 3.48224600  | -3.12474200 | 3.12914900  |
| C | 5.85356000  | -2.47294100 | 0.79965900  |
| H | 5.51968800  | -2.35362400 | -1.31682200 |
| H | 5.88604900  | -2.70920100 | 2.95074000  |
| S | -1.29618500 | -0.80736900 | -2.63331400 |
| O | -0.12474700 | -0.59720500 | -3.46277900 |
| O | -2.24675800 | 0.26119400  | -2.34446800 |
| C | -2.19902600 | -2.21240600 | -3.20188800 |
| C | -1.49186300 | -3.30063700 | -3.71162700 |
| C | -3.58912600 | -2.21262200 | -3.13241400 |
| C | -2.20028800 | -4.40757400 | -4.15000400 |
| H | -0.40650200 | -3.27377300 | -3.77920800 |
| C | -4.27858500 | -3.33121500 | -3.58279100 |
| H | -4.11837000 | -1.34122900 | -2.75308300 |
| C | -3.59984500 | -4.44040100 | -4.09394500 |
| H | -1.66485200 | -5.26400300 | -4.55620200 |
| H | -5.36634900 | -3.34303800 | -3.54801100 |
| C | -4.34335600 | -5.63563400 | -4.59734300 |
| H | -5.41012800 | -5.58058600 | -4.36078100 |
| H | -4.24703100 | -5.72251200 | -5.68671700 |
| H | -3.94378700 | -6.56226300 | -4.16956100 |
| H | 1.53799000  | -0.32365700 | -0.32203500 |

|    |             |             |             |
|----|-------------|-------------|-------------|
| H  | 1.34929900  | -1.65503700 | -1.83403000 |
| Cu | -3.28087600 | -1.20922500 | 0.09115900  |
| N  | -5.01959300 | -0.48839200 | 0.24340200  |
| C  | -6.08385700 | -0.03400700 | 0.28233100  |
| C  | -7.41031000 | 0.52886200  | 0.33171000  |
| H  | -7.35086500 | 1.61791400  | 0.44857200  |
| H  | -7.94697700 | 0.29743200  | -0.59371200 |
| H  | -7.96138600 | 0.10156200  | 1.17549100  |
| C  | -0.61334100 | -3.50845600 | 1.83385700  |
| C  | 0.86064100  | -3.65918900 | 2.10565000  |
| C  | -1.24615600 | -3.40062800 | 3.22004000  |
| C  | 1.06056200  | -4.19573600 | 3.48422000  |
| C  | -0.37498300 | -4.38312300 | 4.02220500  |
| H  | -2.30614200 | -3.67433800 | 3.22810100  |
| H  | -1.16624100 | -2.38150800 | 3.62148000  |
| H  | 1.66869500  | -5.10858000 | 3.52753000  |
| H  | 1.59594500  | -3.44521700 | 4.08875400  |
| H  | -0.44072900 | -4.23254500 | 5.10435700  |
| H  | -0.71169200 | -5.40806900 | 3.81979900  |
| O  | 7.16116400  | -2.18860000 | 0.59942200  |
| C  | 8.01427800  | -2.17629400 | 1.72779900  |
| H  | 8.03959300  | -3.15430500 | 2.22593900  |
| H  | 9.01601500  | -1.94578300 | 1.35790300  |
| H  | 7.71099100  | -1.40917300 | 2.45534000  |
| C  | 0.56795300  | 1.03322100  | 1.13853200  |
| C  | 1.31168600  | 0.83640000  | -0.03024700 |
| N  | 0.64178700  | 1.51886800  | -1.04740200 |
| C  | -0.58351600 | 2.16310000  | -0.55715800 |
| C  | -0.59672100 | 1.74836000  | 0.86203000  |
| C  | -1.48256700 | 1.78242000  | 1.99396700  |
| C  | -2.86907000 | 2.24710900  | 1.97994700  |



|    |             |            |             |
|----|-------------|------------|-------------|
| C  | -3.39182100 | 2.92880500 | 0.86507500  |
| C  | -3.73854300 | 2.00371600 | 3.05122500  |
| C  | -4.71069300 | 3.33356200 | 0.82128500  |
| H  | -2.75875500 | 3.17047500 | 0.01578200  |
| C  | -5.06916600 | 2.40128100 | 3.02148900  |
| H  | -3.38014700 | 1.49320800 | 3.94074000  |
| C  | -5.56381100 | 3.07043000 | 1.89893400  |
| H  | -5.10719400 | 3.87025900 | -0.03708400 |
| H  | -5.70386000 | 2.19456900 | 3.87835500  |
| S  | 1.47116400  | 2.11306600 | -2.42337400 |
| O  | 0.47975000  | 2.24947200 | -3.46507500 |
| O  | 2.62691400  | 1.22133800 | -2.51518500 |
| C  | 2.01171000  | 3.73131200 | -1.95575000 |
| C  | 1.23117500  | 4.82820500 | -2.32605800 |
| C  | 3.19539400  | 3.89782600 | -1.23972700 |
| C  | 1.64033200  | 6.09827700 | -1.95126300 |
| H  | 0.33101600  | 4.68368400 | -2.91829500 |
| C  | 3.58535900  | 5.17823000 | -0.87311000 |
| H  | 3.82572500  | 3.04442100 | -0.99873100 |
| C  | 2.81579400  | 6.29385600 | -1.21697700 |
| H  | 1.04601200  | 6.96241500 | -2.24317600 |
| H  | 4.51475000  | 5.32297000 | -0.32547000 |
| C  | 3.23460500  | 7.67274200 | -0.82137700 |
| H  | 2.52601300  | 8.10675300 | -0.10517100 |
| H  | 4.22631700  | 7.67908200 | -0.35949300 |
| H  | 3.25705100  | 8.34211000 | -1.68896400 |
| H  | -1.44458400 | 1.79887700 | -1.14191200 |
| H  | -0.53487100 | 3.25846200 | -0.66677000 |
| Cu | 3.31512500  | 0.64368200 | -0.13420200 |
| N  | 5.21248500  | 0.80336100 | -0.03351700 |
| C  | 6.36645800  | 0.81675500 | -0.12644100 |

|   |             |             |             |
|---|-------------|-------------|-------------|
| C | 7.80088100  | 0.81416300  | -0.26146900 |
| H | 8.11720600  | -0.16165700 | -0.64544800 |
| H | 8.11138800  | 1.60051800  | -0.95592200 |
| H | 8.27096800  | 0.98912500  | 0.71140800  |
| C | 0.61281100  | 0.77852700  | 2.59524400  |
| C | -0.77807500 | 1.15467500  | 3.00828900  |
| C | 0.88408200  | -0.51558400 | 3.34891800  |
| C | -1.08089700 | 0.54597200  | 4.32946600  |
| C | 0.20789000  | -0.21906400 | 4.69581900  |
| H | 1.95108400  | -0.75309700 | 3.43576800  |
| H | 0.39224100  | -1.34787200 | 2.83445600  |
| H | -1.40575700 | 1.26360000  | 5.09443300  |
| H | -1.92378600 | -0.15409500 | 4.19319900  |
| H | 0.00421100  | -1.12122500 | 5.28255600  |
| H | 0.85974800  | 0.42119000  | 5.30397700  |
| O | -6.83861500 | 3.48762000  | 1.75218200  |
| C | -7.72679700 | 3.33050200  | 2.84491200  |
| H | -7.37417500 | 3.87775900  | 3.72836100  |
| H | -8.68304400 | 3.74868600  | 2.52532000  |
| H | -7.86709800 | 2.27199800  | 3.10640600  |
| H | -0.94781900 | -4.48393300 | 1.42710900  |
| H | 1.28532700  | 1.55074600  | 3.02119200  |

## **K**

|   |             |             |            |
|---|-------------|-------------|------------|
| C | 0.86115800  | -1.75518300 | 1.65807800 |
| C | 1.77335100  | -0.74670700 | 1.48806300 |
| N | 0.94068600  | 0.39431800  | 1.36377000 |
| C | -0.43196500 | 0.09400900  | 1.51227900 |
| C | -0.48629500 | -1.26260300 | 1.67481100 |
| C | -1.41529800 | -2.39824400 | 1.79145400 |
| C | -2.87037100 | -2.32665700 | 1.66366700 |

|    |             |             |            |
|----|-------------|-------------|------------|
| C  | -3.50187100 | -1.17576700 | 1.16067600 |
| C  | -3.69343500 | -3.40493300 | 2.00932600 |
| C  | -4.87383100 | -1.11523300 | 0.98847900 |
| H  | -2.89995900 | -0.30677000 | 0.89988100 |
| C  | -5.07314900 | -3.36306000 | 1.83915800 |
| H  | -3.24931900 | -4.29636200 | 2.44716700 |
| C  | -5.67370100 | -2.21451100 | 1.31970400 |
| H  | -5.35321400 | -0.21496000 | 0.60676800 |
| H  | -5.67039600 | -4.22253200 | 2.12959100 |
| S  | 1.49902500  | 1.97753300  | 1.27279000 |
| O  | 0.59023000  | 2.67676900  | 0.36357800 |
| O  | 2.92206200  | 1.92013000  | 0.95596700 |
| C  | 1.28931900  | 2.64008500  | 2.89391500 |
| C  | 0.14110200  | 3.36727900  | 3.19780000 |
| C  | 2.26936500  | 2.38583300  | 3.84907900 |
| C  | -0.01176200 | 3.85735800  | 4.48626800 |
| H  | -0.61266400 | 3.54371200  | 2.43313700 |
| C  | 2.09497800  | 2.88626700  | 5.13126200 |
| H  | 3.15459800  | 1.81052800  | 3.58694600 |
| C  | 0.95954200  | 3.62900500  | 5.46740500 |
| H  | -0.90182100 | 4.43050300  | 4.74128300 |
| H  | 2.85386300  | 2.70123400  | 5.88940700 |
| C  | 0.78749300  | 4.19006900  | 6.84367400 |
| H  | 1.47648000  | 3.72875000  | 7.55808600 |
| H  | 0.97850300  | 5.27085800  | 6.85130500 |
| H  | -0.23485600 | 4.04423600  | 7.21013400 |
| H  | -1.17482600 | 0.88298900  | 1.50165400 |
| Cu | 3.63999100  | -0.66588200 | 1.14771100 |
| N  | 5.49266900  | -0.57528600 | 0.77699700 |
| C  | 6.59441900  | -0.42014400 | 0.45875800 |
| C  | 7.96515900  | -0.21744800 | 0.05626500 |

|   |             |             |             |
|---|-------------|-------------|-------------|
| H | 8.01457900  | 0.60046200  | -0.66908800 |
| H | 8.57704000  | 0.03943700  | 0.92621600  |
| H | 8.36088100  | -1.13031900 | -0.39922400 |
| C | 0.83128600  | -3.22949400 | 1.86488900  |
| C | -0.65096500 | -3.52127000 | 1.89739800  |
| C | 1.28532000  | -4.21837900 | 0.79077300  |
| C | -0.88113700 | -4.98348700 | 1.66374200  |
| C | 0.49849000  | -5.48491600 | 1.15955900  |
| H | 2.37050100  | -4.37105400 | 0.75710500  |
| H | 0.96734100  | -3.82849800 | -0.19019500 |
| H | -1.19718500 | -5.52803700 | 2.56498500  |
| H | -1.67766300 | -5.14106000 | 0.91984400  |
| H | 0.41188700  | -6.19724200 | 0.33018400  |
| H | 1.01992000  | -6.00894400 | 1.97149400  |
| O | -7.00141600 | -2.06819800 | 1.11196000  |
| C | -7.84558600 | -3.14058600 | 1.46644900  |
| H | -7.79337900 | -3.36112600 | 2.54177600  |
| H | -8.86330300 | -2.83020400 | 1.21948800  |
| H | -7.60598100 | -4.05285100 | 0.90155200  |
| C | -1.94427600 | -1.18484600 | -2.23123600 |
| C | -2.92115200 | -0.25830200 | -1.90056200 |
| N | -2.35426100 | 0.93942000  | -1.66660500 |
| C | -0.89164700 | 0.85583300  | -1.79612600 |
| C | -0.70829100 | -0.55092900 | -2.20889500 |
| C | 0.35490700  | -1.44528400 | -2.58085400 |
| C | 1.78777100  | -1.15359600 | -2.60398200 |
| C | 2.32721600  | -0.05525800 | -1.91546600 |
| C | 2.67247800  | -1.96970200 | -3.31688100 |
| C | 3.68491300  | 0.20519700  | -1.92627000 |
| H | 1.68465400  | 0.60132700  | -1.33205800 |
| C | 4.03962800  | -1.72242600 | -3.33828600 |

|   |             |             |             |
|---|-------------|-------------|-------------|
| H | 2.28783500  | -2.80642100 | -3.89618600 |
| C | 4.55435800  | -0.62928800 | -2.63762800 |
| H | 4.09118300  | 1.04937900  | -1.37345200 |
| H | 4.68782200  | -2.37687300 | -3.91318400 |
| S | -3.18867400 | 2.26128700  | -0.88897600 |
| O | -2.57787100 | 2.40894100  | 0.41762700  |
| O | -4.58731800 | 1.90907700  | -1.04583800 |
| C | -2.74548600 | 3.61057800  | -1.91811900 |
| C | -1.56600900 | 4.30999100  | -1.65230300 |
| C | -3.58736000 | 3.94715600  | -2.97540900 |
| C | -1.23529700 | 5.36881600  | -2.48301500 |
| H | -0.92389100 | 4.02559700  | -0.81904300 |
| C | -3.23324900 | 5.01520900  | -3.78635400 |
| H | -4.50766700 | 3.39441200  | -3.14626400 |
| C | -2.05937300 | 5.73839100  | -3.55403900 |
| H | -0.32170600 | 5.93005500  | -2.29462900 |
| H | -3.88047700 | 5.30115600  | -4.61282900 |
| C | -1.68435300 | 6.89789900  | -4.41983600 |
| H | -0.67600800 | 6.77372100  | -4.83210400 |
| H | -2.38145900 | 7.02519700  | -5.25337600 |
| H | -1.67719300 | 7.82943100  | -3.84080500 |
| H | -0.43059600 | 1.09094700  | -0.82285900 |
| H | -0.52053800 | 1.58912500  | -2.52605400 |
| C | -1.75824000 | -2.58930600 | -2.65736500 |
| C | -0.26954700 | -2.65153400 | -2.82822300 |
| C | -1.95670300 | -3.76768000 | -1.69535800 |
| C | 0.17832600  | -4.07065900 | -2.87134300 |
| C | -1.04603700 | -4.84145300 | -2.31132200 |
| H | -3.00154600 | -4.07805400 | -1.59037800 |
| H | -1.58731300 | -3.46446500 | -0.70448200 |
| H | 0.43880500  | -4.39542400 | -3.88876200 |

|   |             |             |             |
|---|-------------|-------------|-------------|
| H | 1.08518400  | -4.20644600 | -2.26665700 |
| H | -0.75587300 | -5.60731300 | -1.58372800 |
| H | -1.57164300 | -5.35429200 | -3.12632000 |
| O | 5.86644400  | -0.29886900 | -2.59844000 |
| C | 6.75920200  | -1.06604500 | -3.38027900 |
| H | 6.47934000  | -1.05383200 | -4.44219000 |
| H | 7.74431700  | -0.60457700 | -3.27781500 |
| H | 6.81179800  | -2.10820500 | -3.03459200 |
| H | -2.26688200 | -2.80419900 | -3.61197300 |
| H | 1.30090500  | -3.52006000 | 2.82194200  |
| H | -3.99647800 | -0.37972500 | -1.80703800 |

### TS<sub>b</sub>

Number of imaginary frequencies: 1

Lowest frequency (cm<sup>-1</sup>): -920.1

|   |             |             |             |
|---|-------------|-------------|-------------|
| C | 0.29016200  | 1.03529300  | 0.20991700  |
| C | -0.87788500 | 0.57896600  | -0.33236000 |
| N | -0.52688000 | -0.68791600 | -0.85777800 |
| C | 0.78035300  | -1.02302400 | -0.68022900 |
| C | 1.36095300  | 0.07582300  | 0.03762500  |
| C | 2.65763300  | 0.70190100  | 0.37766700  |
| C | 3.97507700  | 0.10257000  | 0.18210800  |
| C | 4.20707500  | -0.86128300 | -0.81340800 |
| C | 5.05598800  | 0.48154000  | 0.98445600  |
| C | 5.45948800  | -1.41392400 | -0.99650400 |
| H | 3.40082300  | -1.16301600 | -1.47983100 |
| C | 6.32209500  | -0.06375300 | 0.81105300  |
| H | 4.90057200  | 1.20375400  | 1.78378200  |
| C | 6.53078600  | -1.02147100 | -0.18424500 |
| H | 5.64279300  | -2.15504300 | -1.77044600 |
| H | 7.13203700  | 0.25378200  | 1.46104200  |

|    |             |             |             |
|----|-------------|-------------|-------------|
| S  | -1.68550900 | -1.81270000 | -1.53832500 |
| O  | -0.88762000 | -2.99353800 | -1.81186200 |
| O  | -2.38001200 | -1.08642100 | -2.58169600 |
| C  | -2.76954700 | -2.08359800 | -0.17978200 |
| C  | -2.32119100 | -2.84233600 | 0.90101400  |
| C  | -4.04249900 | -1.52217100 | -0.20659800 |
| C  | -3.17205200 | -3.02869100 | 1.97704200  |
| H  | -1.32939200 | -3.28997000 | 0.89030100  |
| C  | -4.87948500 | -1.72494700 | 0.88369200  |
| H  | -4.37206300 | -0.96128800 | -1.07797200 |
| C  | -4.45933700 | -2.47264300 | 1.98668900  |
| H  | -2.84434100 | -3.62281700 | 2.82837700  |
| H  | -5.88387100 | -1.30572400 | 0.87539100  |
| C  | -5.35910800 | -2.69474600 | 3.15970400  |
| H  | -4.89917700 | -2.32613900 | 4.08440400  |
| H  | -6.32275300 | -2.19198200 | 3.03496100  |
| H  | -5.55256800 | -3.76411200 | 3.30729800  |
| H  | 1.05831600  | -0.92147300 | 0.72225600  |
| Cu | -2.61985900 | 1.34353600  | -0.40691600 |
| N  | -4.31969200 | 2.16609600  | -0.46008300 |
| C  | -5.34202800 | 2.69996200  | -0.55645400 |
| C  | -6.61396500 | 3.36656900  | -0.68208800 |
| H  | -7.32694000 | 2.95251700  | 0.03701900  |
| H  | -6.49205900 | 4.43664200  | -0.48851100 |
| H  | -7.00566300 | 3.22989500  | -1.69461700 |
| C  | 0.86838900  | 2.24763200  | 0.85125900  |
| C  | 2.34551400  | 1.93848700  | 0.84595100  |
| C  | 0.86310200  | 3.61390000  | 0.15723300  |
| C  | 3.12786500  | 3.19760400  | 1.03061200  |
| C  | 2.07218500  | 4.31009700  | 0.80355800  |
| H  | -0.07425900 | 4.16559400  | 0.28693200  |

|   |            |             |             |
|---|------------|-------------|-------------|
| H | 1.02540100 | 3.46879300  | -0.92004900 |
| H | 3.58741900 | 3.27788500  | 2.02482700  |
| H | 3.95300000 | 3.23706400  | 0.30673500  |
| H | 2.45710000 | 5.13451000  | 0.19612600  |
| H | 1.77204100 | 4.73679400  | 1.76915600  |
| O | 7.71010500 | -1.62291000 | -0.43336000 |
| C | 8.82177700 | -1.25948800 | 0.35856100  |
| H | 8.65383800 | -1.48811300 | 1.42001000  |
| H | 9.66528900 | -1.85210900 | -0.00142400 |
| H | 9.06428000 | -0.19351300 | 0.25082300  |
| H | 0.50660000 | 2.37873700  | 1.88634500  |
| H | 1.20576300 | -1.95395600 | -1.03765600 |

## L

|   |             |             |             |
|---|-------------|-------------|-------------|
| C | -0.20516000 | -0.79471500 | 0.97585300  |
| C | 0.87096800  | -0.62442600 | 0.17783900  |
| N | 0.58538900  | 0.64960100  | -0.46773600 |
| C | -0.58970000 | 1.15585100  | -0.20381600 |
| C | -1.21189200 | 0.30809900  | 0.83241000  |
| C | -2.53653800 | -0.46277400 | 0.77769800  |
| C | -3.80477100 | 0.10380400  | 0.32181700  |
| C | -3.87074400 | 1.08169500  | -0.68462400 |
| C | -5.01525300 | -0.33787700 | 0.86923700  |
| C | -5.08054500 | 1.58041300  | -1.12841100 |
| H | -2.95852500 | 1.43854800  | -1.16004900 |
| C | -6.24026700 | 0.15086800  | 0.43308400  |
| H | -5.00101600 | -1.06756300 | 1.67573500  |
| C | -6.27979000 | 1.11744100  | -0.57424200 |
| H | -5.13012400 | 2.33015800  | -1.91409400 |
| H | -7.15416900 | -0.21676200 | 0.89011700  |
| S | 1.77282600  | 1.49334300  | -1.51400100 |



|    |             |             |             |
|----|-------------|-------------|-------------|
| O  | 0.98520100  | 2.53325700  | -2.14315600 |
| O  | 2.42002200  | 0.43505100  | -2.26012200 |
| C  | 2.86069200  | 2.16380500  | -0.31606400 |
| C  | 2.58052400  | 3.42365200  | 0.21106000  |
| C  | 3.97494600  | 1.42516200  | 0.08257600  |
| C  | 3.44708000  | 3.95077000  | 1.15544200  |
| H  | 1.71154700  | 3.98516300  | -0.12373800 |
| C  | 4.82470000  | 1.97500900  | 1.02855000  |
| H  | 4.17251500  | 0.44742500  | -0.35207000 |
| C  | 4.57872400  | 3.24136500  | 1.57328400  |
| H  | 3.25253700  | 4.93606800  | 1.57376700  |
| H  | 5.70381800  | 1.41886000  | 1.34837500  |
| C  | 5.53004000  | 3.83501800  | 2.56065100  |
| H  | 5.06215700  | 4.63382800  | 3.14402000  |
| H  | 5.91640100  | 3.07937800  | 3.25274100  |
| H  | 6.39525900  | 4.27002100  | 2.04401300  |
| Cu | 2.31169700  | -1.76013500 | -0.32226300 |
| N  | 3.72344300  | -2.92471600 | -0.78056400 |
| C  | 4.56737500  | -3.65171800 | -1.09445500 |
| C  | 5.61853600  | -4.55792400 | -1.48320100 |
| H  | 5.28151800  | -5.18159500 | -2.31660500 |
| H  | 6.50087400  | -3.99144700 | -1.79610800 |
| H  | 5.88662200  | -5.20035500 | -0.63919700 |
| C  | -0.85800500 | -1.96849400 | 1.61752700  |
| C  | -2.30658900 | -1.69233900 | 1.28473500  |
| C  | -0.68039400 | -3.38234700 | 1.06355400  |
| C  | -3.09191500 | -2.96539200 | 1.34845700  |
| C  | -2.00003700 | -4.05822500 | 1.46644300  |
| H  | 0.20243300  | -3.90513900 | 1.44851000  |
| H  | -0.59300900 | -3.32413900 | -0.03140900 |
| H  | -3.78347500 | -3.00280200 | 2.20067400  |

|   |             |             |             |
|---|-------------|-------------|-------------|
| H | -3.70887700 | -3.07732200 | 0.44647200  |
| H | -2.22422000 | -4.94113000 | 0.86002800  |
| H | -1.93074100 | -4.39596600 | 2.50862200  |
| O | -7.40966800 | 1.66147300  | -1.06851800 |
| C | -8.64272200 | 1.20914000  | -0.54963800 |
| H | -8.73331400 | 1.42155200  | 0.52466700  |
| H | -9.42313900 | 1.75440300  | -1.08430900 |
| H | -8.78190000 | 0.13216400  | -0.71766300 |
| H | -0.70561500 | -1.98346100 | 2.71169700  |
| H | -0.89742300 | 2.12405400  | -0.59187300 |
| H | -1.22642000 | 0.99889500  | 1.70518700  |

### TS<sub>D1</sub>

Number of imaginary frequencies: 1

Lowest frequency (cm<sup>-1</sup>): -823.9

|   |             |             |             |
|---|-------------|-------------|-------------|
| C | 0.27185700  | -1.51270600 | -0.32687900 |
| C | -1.02127900 | -1.08865900 | -0.13753100 |
| N | -0.87845500 | 0.30313200  | 0.09028200  |
| C | 0.52268000  | 0.70960300  | 0.22268600  |
| C | 1.20414600  | -0.45545000 | -0.13613500 |
| C | 2.55680800  | -0.92335600 | -0.37492100 |
| C | 3.77792500  | -0.14320500 | -0.17798600 |
| C | 3.80018100  | 0.95892500  | 0.69222100  |
| C | 4.96224200  | -0.46896800 | -0.84499800 |
| C | 4.95411000  | 1.69085600  | 0.89243100  |
| H | 2.89826300  | 1.22811500  | 1.23972400  |
| C | 6.13139400  | 0.25987400  | -0.65725400 |
| H | 4.96747600  | -1.29777700 | -1.55059300 |
| C | 6.13202000  | 1.34897200  | 0.21688600  |
| H | 4.97724100  | 2.53905400  | 1.57235800  |
| H | 7.02811200  | -0.01916800 | -1.20300200 |

|    |             |             |             |
|----|-------------|-------------|-------------|
| S  | -1.90627800 | 1.08093700  | 1.16556600  |
| O  | -0.84379900 | 1.63075900  | 2.15164800  |
| O  | -2.93022900 | 0.21752500  | 1.70710400  |
| C  | -2.60441400 | 2.47270400  | 0.37413800  |
| C  | -1.87559900 | 3.65691900  | 0.25768300  |
| C  | -3.86778900 | 2.31511800  | -0.19417600 |
| C  | -2.44711000 | 4.70763600  | -0.43984200 |
| H  | -0.89702600 | 3.76392700  | 0.71787700  |
| C  | -4.41280700 | 3.38384900  | -0.88793200 |
| H  | -4.41333300 | 1.38077900  | -0.08561400 |
| C  | -3.71662900 | 4.58993700  | -1.02010200 |
| H  | -1.90345400 | 5.64537700  | -0.53512300 |
| H  | -5.39979900 | 3.28509300  | -1.33464600 |
| C  | -4.32113900 | 5.74755300  | -1.74527300 |
| H  | -5.15461700 | 5.43661000  | -2.38207100 |
| H  | -4.70744600 | 6.48744900  | -1.03267200 |
| H  | -3.57980900 | 6.25984300  | -2.36776300 |
| H  | 0.78626400  | 1.69979700  | -0.15422000 |
| Cu | -2.68642700 | -2.00648600 | -0.09039100 |
| N  | -4.34088100 | -2.91031600 | -0.07282700 |
| C  | -5.34012000 | -3.49270800 | -0.03463500 |
| C  | -6.58251000 | -4.22242800 | 0.01149300  |
| H  | -7.14138400 | -3.94977800 | 0.91179800  |
| H  | -7.18548300 | -3.98661700 | -0.87046100 |
| H  | -6.37923500 | -5.29736300 | 0.02882500  |
| C  | 1.02041300  | -2.73252700 | -0.74202400 |
| C  | 2.44418300  | -2.24622200 | -0.70252300 |
| C  | 1.13409100  | -3.99442100 | 0.11993000  |
| C  | 3.38360600  | -3.40487500 | -0.67826800 |
| C  | 2.45319400  | -4.60747900 | -0.37801300 |
| H  | 0.27893300  | -4.67181700 | 0.02071400  |

|   |            |             |             |
|---|------------|-------------|-------------|
| H | 1.21450800 | -3.70208900 | 1.17637200  |
| H | 3.92510400 | -3.53986000 | -1.62451600 |
| H | 4.15097500 | -3.25389000 | 0.09375400  |
| H | 2.89196700 | -5.30899200 | 0.33791100  |
| H | 2.26562500 | -5.16826500 | -1.30271500 |
| O | 7.20322700 | 2.12829000  | 0.47077500  |
| C | 8.41272400 | 1.82995800  | -0.19263300 |
| H | 8.30829500 | 1.91352200  | -1.28332900 |
| H | 9.14299000 | 2.56590100  | 0.15039600  |
| H | 8.77690100 | 0.82438500  | 0.05931700  |
| H | 0.75052200 | -3.03234500 | -1.76974400 |
| H | 0.07390100 | 1.25549200  | 1.70324600  |

## M

|   |             |             |             |
|---|-------------|-------------|-------------|
| C | -0.50654300 | -1.53415500 | -0.31934900 |
| C | -1.64151400 | -0.78423500 | -0.27448900 |
| N | -1.11418100 | 0.56945100  | -0.27379000 |
| C | 0.33062100  | 0.57899000  | -0.20204500 |
| C | 0.69162800  | -0.73012900 | -0.28057900 |
| C | 1.86645900  | -1.59978500 | -0.32876300 |
| C | 3.25320700  | -1.16425100 | -0.17245500 |
| C | 3.56580100  | 0.06129100  | 0.43869800  |
| C | 4.31842000  | -1.95616300 | -0.61352700 |
| C | 4.87542500  | 0.46619700  | 0.61073500  |
| H | 2.76309600  | 0.69617000  | 0.80999600  |
| C | 5.64165100  | -1.56475400 | -0.44558600 |
| H | 4.11053500  | -2.89394800 | -1.12534900 |
| C | 5.92792100  | -0.34546700 | 0.17196300  |
| H | 5.11883200  | 1.41124900  | 1.09041000  |
| H | 6.43893500  | -2.20729600 | -0.80790000 |
| S | -1.92326600 | 1.68192300  | 0.59758600  |

|    |             |             |             |
|----|-------------|-------------|-------------|
| O  | -1.58570000 | 1.43112500  | 2.14084700  |
| O  | -3.35386400 | 1.63265600  | 0.43137100  |
| C  | -1.20044400 | 3.22145400  | 0.20572000  |
| C  | -0.77593800 | 4.08764700  | 1.21131900  |
| C  | -1.15216300 | 3.56549800  | -1.14941000 |
| C  | -0.27323900 | 5.32471800  | 0.83634400  |
| H  | -0.83319900 | 3.80680500  | 2.25891600  |
| C  | -0.64432200 | 4.80551800  | -1.49029700 |
| H  | -1.48984700 | 2.86893300  | -1.91416800 |
| C  | -0.19986800 | 5.70180400  | -0.50781400 |
| H  | 0.07216900  | 6.01484000  | 1.60285500  |
| H  | -0.58749300 | 5.09141100  | -2.53853400 |
| C  | 0.33067200  | 7.04063000  | -0.90217800 |
| H  | 0.80425200  | 7.55405400  | -0.06058000 |
| H  | 1.06401800  | 6.95349200  | -1.71178100 |
| H  | -0.47888700 | 7.68105700  | -1.27392300 |
| Cu | -3.46601200 | -1.30903700 | -0.22223600 |
| N  | -5.21426300 | -2.02033000 | -0.18468400 |
| C  | -6.29077100 | -2.44376600 | -0.15559100 |
| C  | -7.63220100 | -2.97095600 | -0.11657800 |
| H  | -7.76744100 | -3.70500000 | -0.91643600 |
| H  | -7.81212800 | -3.45590200 | 0.84774200  |
| H  | -8.35444400 | -2.15986700 | -0.24853700 |
| C  | -0.10832700 | -2.96227700 | -0.47933700 |
| C  | 1.39701400  | -2.87465000 | -0.42613000 |
| C  | -0.36918900 | -4.03210600 | 0.58562100  |
| C  | 1.97318200  | -4.22415400 | -0.14305800 |
| C  | 0.73814000  | -5.05558700 | 0.28957600  |
| H  | -1.37678100 | -4.46064300 | 0.54100600  |
| H  | -0.23274100 | -3.58877100 | 1.58251800  |
| H  | 2.47263800  | -4.67359000 | -1.01228600 |

|   |             |             |             |
|---|-------------|-------------|-------------|
| H | 2.73554200  | -4.15522000 | 0.64566500  |
| H | 0.95119100  | -5.70975100 | 1.14067000  |
| H | 0.42131400  | -5.70185800 | -0.53923500 |
| O | 7.17156600  | 0.13457100  | 0.38316200  |
| C | 8.26484600  | -0.66302900 | -0.01704600 |
| H | 8.26697600  | -0.83616200 | -1.10214500 |
| H | 9.16694900  | -0.11013800 | 0.25391500  |
| H | 8.27171800  | -1.63133900 | 0.50247100  |
| H | -0.43597700 | -3.35731300 | -1.45690900 |
| H | -0.71552600 | 0.98875300  | 2.22502800  |
| H | 0.87319600  | 1.51097700  | -0.29815300 |

**[CuL8]-R TS<sub>B</sub>**

Number of imaginary frequencies: 1

Lowest frequency (cm<sup>-1</sup>): -223.2

|   |            |             |             |
|---|------------|-------------|-------------|
| C | 2.46300400 | -0.96305000 | -0.00858200 |
| C | 1.61643200 | 0.05066500  | 0.49105400  |
| N | 2.44458400 | 0.93948300  | 1.09798400  |
| C | 3.88009200 | 0.59033500  | 1.06226800  |
| C | 3.81916500 | -0.75497800 | 0.38955600  |
| C | 4.76439700 | -1.71188600 | 0.27498200  |
| C | 6.14459100 | -1.76524500 | -0.00380300 |
| C | 6.79070500 | -0.78920200 | -0.80962700 |
| C | 6.93273100 | -2.81244100 | 0.52387000  |
| C | 8.14177000 | -0.84537900 | -1.04205300 |
| H | 6.19448300 | 0.00964500  | -1.24724400 |
| C | 8.29479300 | -2.87189400 | 0.31058600  |
| H | 6.43932400 | -3.57579500 | 1.12128900  |
| C | 8.90944200 | -1.88166000 | -0.47424800 |
| H | 8.65219500 | -0.10447500 | -1.65183400 |
| H | 8.87629900 | -3.67943400 | 0.74440200  |

|    |             |             |             |
|----|-------------|-------------|-------------|
| S  | 1.89252400  | 2.26679200  | 2.02337000  |
| O  | 2.48150800  | 2.14350800  | 3.34678200  |
| O  | 0.44534500  | 2.30001000  | 1.84436700  |
| C  | 2.64489000  | 3.62002400  | 1.17690000  |
| C  | 3.60656900  | 4.38631600  | 1.83096100  |
| C  | 2.26625000  | 3.88441000  | -0.13726700 |
| C  | 4.19342500  | 5.44040400  | 1.14607800  |
| H  | 3.88003600  | 4.15579800  | 2.85754700  |
| C  | 2.86680400  | 4.94373200  | -0.80223600 |
| H  | 1.51053900  | 3.27652600  | -0.63443400 |
| C  | 3.83480000  | 5.73413400  | -0.17422300 |
| H  | 4.94530400  | 6.05180400  | 1.64248500  |
| H  | 2.57171500  | 5.16605900  | -1.82666500 |
| C  | 4.48248000  | 6.87684900  | -0.89019300 |
| H  | 5.57191200  | 6.75605200  | -0.92260100 |
| H  | 4.12103400  | 6.96833500  | -1.91889700 |
| H  | 4.28452600  | 7.82569900  | -0.37683800 |
| H  | 4.30101400  | 0.58168800  | 2.07372900  |
| H  | 4.43411700  | 1.32069700  | 0.45568100  |
| Cu | -0.33825100 | 0.25185000  | 0.47290000  |
| C  | 2.18902900  | -2.17508600 | -0.67465600 |
| C  | 3.21926300  | -2.90974700 | -1.21386500 |
| C  | 0.91946300  | -2.97343000 | -0.63550100 |
| C  | 2.77865200  | -4.31913000 | -1.49248700 |
| H  | 4.09742000  | -2.45950900 | -1.67115200 |
| C  | 1.24061000  | -4.19481400 | -1.51140700 |
| H  | 0.04166100  | -2.40719300 | -0.98194100 |
| H  | 0.70496300  | -3.25783700 | 0.40775800  |
| H  | 3.18325400  | -4.72606600 | -2.42612500 |
| H  | 3.10931500  | -4.99202200 | -0.68720000 |
| H  | 0.73412300  | -5.10510400 | -1.17445100 |

|   |             |             |             |
|---|-------------|-------------|-------------|
| H | 0.90537400  | -4.00053000 | -2.53905600 |
| O | 10.21478700 | -1.83863900 | -0.74217200 |
| C | 11.06317900 | -2.83846400 | -0.19727300 |
| H | 10.80382400 | -3.83288000 | -0.58067300 |
| H | 12.07501500 | -2.58460000 | -0.51673400 |
| H | 11.02172100 | -2.84164300 | 0.89888800  |
| P | -1.95112700 | -0.81767200 | 1.77706000  |
| P | -1.58587400 | 1.02598600  | -1.34233200 |
| O | -3.52048400 | -4.41339100 | -2.64995500 |
| O | -4.28645400 | -2.25645200 | -2.72224300 |
| O | -6.18428900 | -1.12537700 | -0.00682900 |
| O | -7.38063700 | 0.83514500  | -0.13213600 |
| C | -2.63052400 | -2.01197000 | 0.56257100  |
| C | -2.21008500 | -3.34186500 | 0.60716900  |
| H | -1.65393500 | -3.69195100 | 1.47409200  |
| C | -2.45852400 | -4.25104500 | -0.43062300 |
| H | -2.13674700 | -5.28657800 | -0.37307400 |
| C | -3.12641500 | -3.76019100 | -1.52600200 |
| C | -3.98958000 | -3.39226100 | -3.52176100 |
| H | -4.89414900 | -3.73091400 | -4.03458800 |
| H | -3.19426300 | -3.13340800 | -4.24273900 |
| C | -3.57864500 | -2.44362600 | -1.57362400 |
| C | -3.36032500 | -1.52784500 | -0.56431800 |
| C | -1.33620000 | -1.83063900 | 3.17232000  |
| C | 0.02926700  | -1.77692000 | 3.46428800  |
| H | 0.68181200  | -1.14940500 | 2.85571500  |
| C | 0.55216900  | -2.50702800 | 4.52832200  |
| H | 1.61533600  | -2.45413000 | 4.75066900  |
| C | -0.28745800 | -3.29463100 | 5.30701200  |
| H | 0.11810900  | -3.86318700 | 6.14073900  |
| C | -1.65127400 | -3.35257100 | 5.02465800  |



|   |             |             |             |
|---|-------------|-------------|-------------|
| H | -2.30832400 | -3.96664200 | 5.63620900  |
| C | -2.17478700 | -2.62294800 | 3.96528200  |
| H | -3.24207100 | -2.67041500 | 3.75389900  |
| C | -3.37270400 | 0.09518900  | 2.46800100  |
| C | -4.61948100 | -0.49106900 | 2.70834900  |
| H | -4.79768800 | -1.53065900 | 2.43466900  |
| C | -5.64295800 | 0.26165000  | 3.27334400  |
| H | -6.60876000 | -0.19942800 | 3.47114400  |
| C | -5.43152300 | 1.60140700  | 3.59408800  |
| H | -6.23553800 | 2.18687000  | 4.03400500  |
| C | -4.19537400 | 2.19036900  | 3.35042800  |
| H | -4.02939500 | 3.23602700  | 3.59888400  |
| C | -3.16680900 | 1.43932200  | 2.78941000  |
| H | -2.19120500 | 1.89118700  | 2.60214800  |
| C | -3.39514400 | 1.02195000  | -1.07733200 |
| C | -4.01384400 | -0.19287700 | -0.67087000 |
| C | -5.36602300 | -0.11597900 | -0.40817700 |
| C | -7.47910100 | -0.55639100 | 0.14506600  |
| H | -8.17476500 | -1.02493900 | -0.56494200 |
| H | -7.82853000 | -0.70293300 | 1.17630200  |
| C | -6.09230600 | 1.06703200  | -0.48457900 |
| C | -5.50561200 | 2.24878700  | -0.86511700 |
| H | -6.07190600 | 3.17248200  | -0.93101800 |
| C | -4.13938700 | 2.19737600  | -1.17168500 |
| H | -3.65166900 | 3.11577800  | -1.48754500 |
| C | -1.18590600 | 2.75956700  | -1.76452400 |
| C | -1.18960100 | 3.69616800  | -0.72195700 |
| H | -1.43371300 | 3.37464000  | 0.29060000  |
| C | -0.88248700 | 5.02761200  | -0.97140500 |
| H | -0.89252800 | 5.74633200  | -0.15518000 |
| C | -0.54166800 | 5.43348800  | -2.26052900 |

|   |             |             |             |
|---|-------------|-------------|-------------|
| H | -0.29493800 | 6.47486400  | -2.45573400 |
| C | -0.51270100 | 4.50451100  | -3.29569900 |
| H | -0.24680300 | 4.81711400  | -4.30307900 |
| C | -0.83931000 | 3.17189200  | -3.05284400 |
| H | -0.82763100 | 2.45436300  | -3.87173300 |
| C | -1.31853300 | 0.10201500  | -2.89479300 |
| C | -0.06893700 | -0.49497400 | -3.08982300 |
| H | 0.69367800  | -0.40716500 | -2.31419100 |
| C | 0.20215700  | -1.19311000 | -4.26173900 |
| H | 1.17919200  | -1.65130400 | -4.40375500 |
| C | -0.77798900 | -1.30261200 | -5.24488500 |
| H | -0.56961100 | -1.84987000 | -6.16158000 |
| C | -2.02340500 | -0.70639600 | -5.05818000 |
| H | -2.78622900 | -0.78520300 | -5.83025300 |
| C | -2.29647200 | -0.00557200 | -3.88715900 |
| H | -3.27351000 | 0.45375500  | -3.74201400 |

**[CuL8]-S TS<sub>B</sub>**

Number of imaginary frequencies: 1

Lowest frequency (cm<sup>-1</sup>): -173.4

|   |            |             |             |
|---|------------|-------------|-------------|
| C | 2.50378700 | -0.64244500 | -0.13463800 |
| C | 1.63047300 | 0.16608100  | 0.61506300  |
| N | 2.42504000 | 0.86473300  | 1.47673900  |
| C | 3.87201700 | 0.62174500  | 1.32285600  |
| C | 3.87583700 | -0.31891300 | 0.14742900  |
| C | 4.90085400 | -0.70780000 | -0.62519600 |
| C | 6.24104800 | -1.11496500 | -0.52107600 |
| C | 7.14776100 | -0.87546200 | -1.58633100 |
| C | 6.72393500 | -1.79859900 | 0.62143500  |
| C | 8.46056800 | -1.26324100 | -1.49799600 |
| H | 6.77845200 | -0.36926700 | -2.47512900 |

|    |             |             |             |
|----|-------------|-------------|-------------|
| C  | 8.03767300  | -2.20855800 | 0.71453000  |
| H  | 6.03330700  | -2.00580300 | 1.43743800  |
| C  | 8.91721900  | -1.93702900 | -0.34804900 |
| H  | 9.17131300  | -1.07692600 | -2.29854400 |
| H  | 8.38252000  | -2.73251100 | 1.60064900  |
| S  | 1.87739100  | 2.21454200  | 2.36926100  |
| O  | 2.74345000  | 2.28029600  | 3.53397800  |
| O  | 0.43548100  | 2.04262600  | 2.49300300  |
| C  | 2.22462500  | 3.58640000  | 1.31332100  |
| C  | 3.33183600  | 4.38872400  | 1.56910500  |
| C  | 1.38935300  | 3.82291500  | 0.22175100  |
| C  | 3.59871800  | 5.44830900  | 0.70986300  |
| H  | 3.96090300  | 4.19174500  | 2.43398400  |
| C  | 1.67231900  | 4.88461100  | -0.62095000 |
| H  | 0.51827700  | 3.19524600  | 0.04823300  |
| C  | 2.77956000  | 5.71219800  | -0.39044200 |
| H  | 4.45781700  | 6.08890200  | 0.90005400  |
| H  | 1.01435000  | 5.08285300  | -1.46759800 |
| C  | 3.05951000  | 6.86416100  | -1.30228800 |
| H  | 3.04708400  | 6.55182800  | -2.35297500 |
| H  | 2.29422300  | 7.64293300  | -1.19348100 |
| H  | 4.03161600  | 7.32092700  | -1.09281700 |
| H  | 4.27723800  | 0.14261200  | 2.22309000  |
| H  | 4.41465500  | 1.56098700  | 1.15744900  |
| Cu | -0.33087000 | 0.33647900  | 0.60758200  |
| C  | 2.28469800  | -1.56301000 | -1.18272800 |
| C  | 3.31673600  | -2.34659100 | -1.64061800 |
| C  | 1.08041800  | -1.71028200 | -2.06726800 |
| C  | 2.95889000  | -2.99681500 | -2.94444000 |
| C  | 1.69560300  | -2.23300300 | -3.37552200 |
| H  | 0.51613500  | -0.77919800 | -2.19572800 |

|   |             |             |             |
|---|-------------|-------------|-------------|
| H | 0.39141600  | -2.44938800 | -1.63189100 |
| H | 3.76223900  | -2.95428300 | -3.69023800 |
| H | 2.74959600  | -4.06650700 | -2.78076700 |
| H | 1.00026900  | -2.84671400 | -3.95965000 |
| H | 1.97973200  | -1.37549400 | -4.00014900 |
| O | 10.20387600 | -2.28416700 | -0.35994400 |
| C | 10.74198500 | -2.97547100 | 0.75752900  |
| H | 10.24138700 | -3.93996300 | 0.90733100  |
| H | 11.79396500 | -3.15070300 | 0.52700500  |
| H | 10.66950900 | -2.37301700 | 1.67139100  |
| P | -1.75854400 | -1.10333100 | 1.78511000  |
| P | -1.80411400 | 1.28028900  | -0.93716400 |
| O | -2.06898400 | -4.45498600 | -3.09497500 |
| O | -3.33538200 | -2.55294800 | -3.04609500 |
| O | -5.58920700 | -2.38795400 | -0.63623300 |
| O | -7.31854300 | -0.88295300 | -0.59331700 |
| C | -2.00790700 | -2.26601100 | 0.38325100  |
| C | -1.26309600 | -3.44709900 | 0.34437900  |
| H | -0.69115700 | -3.74034200 | 1.22236900  |
| C | -1.21941800 | -4.27901100 | -0.78338700 |
| H | -0.65027900 | -5.20369400 | -0.79005000 |
| C | -1.92244700 | -3.85235800 | -1.88443400 |
| C | -2.67633000 | -3.46395100 | -3.91263400 |
| H | -3.40167300 | -3.92882200 | -4.58467500 |
| H | -1.89158600 | -2.92644700 | -4.47579000 |
| C | -2.67811100 | -2.68296900 | -1.85767700 |
| C | -2.76230000 | -1.85394100 | -0.75645000 |
| C | -1.02929000 | -2.11025600 | 3.12656800  |
| C | 0.27594900  | -1.81278100 | 3.52598000  |
| H | 0.81006900  | -0.99795000 | 3.03753600  |
| C | 0.88104800  | -2.53825700 | 4.54870600  |

|   |             |             |             |
|---|-------------|-------------|-------------|
| H | 1.89463800  | -2.29456100 | 4.85872800  |
| C | 0.18409700  | -3.56382100 | 5.17702500  |
| H | 0.65406400  | -4.12871200 | 5.97887400  |
| C | -1.12030000 | -3.86346800 | 4.78766300  |
| H | -1.66647600 | -4.66250200 | 5.28366700  |
| C | -1.72695700 | -3.13890300 | 3.76997800  |
| H | -2.74895500 | -3.37405500 | 3.47579000  |
| C | -3.42089500 | -0.66749300 | 2.40497200  |
| C | -4.51108600 | -1.54200400 | 2.36159800  |
| H | -4.40218800 | -2.52685600 | 1.90793800  |
| C | -5.74238000 | -1.14748800 | 2.87298200  |
| H | -6.58849600 | -1.83048700 | 2.83385900  |
| C | -5.89250400 | 0.11787400  | 3.43541900  |
| H | -6.85733000 | 0.42524200  | 3.83205900  |
| C | -4.81046300 | 0.99103300  | 3.48588600  |
| H | -4.92612200 | 1.97981300  | 3.92367800  |
| C | -3.57844200 | 0.60027100  | 2.97106400  |
| H | -2.72767800 | 1.28298700  | 3.00726100  |
| C | -3.52193500 | 0.64927700  | -0.86691800 |
| C | -3.76309500 | -0.75042700 | -0.78395100 |
| C | -5.09244100 | -1.12383500 | -0.74131600 |
| C | -6.99665900 | -2.25561700 | -0.78260700 |
| H | -7.29376700 | -2.56784700 | -1.79650300 |
| H | -7.50661600 | -2.86216500 | -0.02751600 |
| C | -6.14393400 | -0.21525900 | -0.71386700 |
| C | -5.92452100 | 1.13990500  | -0.76190200 |
| H | -6.74173000 | 1.85392100  | -0.73375700 |
| C | -4.58927800 | 1.54990900  | -0.85246000 |
| H | -4.38735500 | 2.61624500  | -0.91126100 |
| C | -1.99040500 | 3.08379100  | -0.70845300 |
| C | -2.05375700 | 3.55902100  | 0.60682000  |

|   |             |             |             |
|---|-------------|-------------|-------------|
| H | -1.95257800 | 2.85801600  | 1.43663100  |
| C | -2.22084300 | 4.91599600  | 0.85558400  |
| H | -2.26714300 | 5.27671800  | 1.88023200  |
| C | -2.31592200 | 5.81069900  | -0.20770300 |
| H | -2.44165300 | 6.87346700  | -0.01405800 |
| C | -2.24781000 | 5.34604800  | -1.51812100 |
| H | -2.32698800 | 6.04384900  | -2.34872000 |
| C | -2.08897100 | 3.98603800  | -1.77130500 |
| H | -2.05132000 | 3.62501200  | -2.79791400 |
| C | -1.27824800 | 1.08878200  | -2.67925100 |
| C | -0.01527800 | 1.57845700  | -3.04039800 |
| H | 0.59222100  | 2.11165200  | -2.30657400 |
| C | 0.47775700  | 1.37648500  | -4.32286500 |
| H | 1.45508700  | 1.76823000  | -4.59558300 |
| C | -0.27379000 | 0.65854100  | -5.25279300 |
| H | 0.11707700  | 0.48932700  | -6.25346600 |
| C | -1.52229100 | 0.16097600  | -4.89691600 |
| H | -2.11760400 | -0.39134400 | -5.62168400 |
| C | -2.03031300 | 0.38220200  | -3.61789900 |
| H | -3.01032800 | -0.00921400 | -3.35140300 |
| H | 4.09874400  | -2.73501500 | -0.99254500 |

### **3a**

|   |             |             |             |
|---|-------------|-------------|-------------|
| C | 2.75867400  | 1.26693600  | -0.42691600 |
| C | 2.60416700  | 0.14025900  | -0.85119300 |
| N | 2.40559300  | -1.08416700 | -1.37336600 |
| C | 1.36737500  | -1.21165700 | -2.42409500 |
| C | 0.05022700  | -0.76209300 | -1.99638900 |
| C | -1.02143800 | -0.34436200 | -1.61178400 |
| C | -2.28289600 | 0.14269700  | -1.16085800 |
| C | -3.20947500 | -0.71698600 | -0.54476600 |

|   |             |             |             |
|---|-------------|-------------|-------------|
| C | -2.62698600 | 1.48997000  | -1.31641300 |
| C | -4.42813000 | -0.24242600 | -0.10116500 |
| H | -2.94858300 | -1.76602000 | -0.41654500 |
| C | -3.85021200 | 1.97730800  | -0.87352100 |
| H | -1.91991400 | 2.16507100  | -1.79328600 |
| C | -4.75843000 | 1.10954100  | -0.26202500 |
| H | -5.15217000 | -0.89975300 | 0.37519600  |
| H | -4.08673800 | 3.02855700  | -1.00881200 |
| S | 2.63629900  | -2.43810400 | -0.33286000 |
| O | 3.72302800  | -2.06173100 | 0.55063500  |
| O | 2.72425000  | -3.58553700 | -1.22167900 |
| C | 1.12618300  | -2.54188800 | 0.57791400  |
| C | 0.87956900  | -1.61228500 | 1.58883400  |
| C | 0.17579400  | -3.48733000 | 0.20912700  |
| C | -0.34930100 | -1.63582700 | 2.22777300  |
| H | 1.63914200  | -0.88400900 | 1.86250700  |
| C | -1.04514400 | -3.50131900 | 0.87193400  |
| H | 0.39577100  | -4.19963200 | -0.58196500 |
| C | -1.32835400 | -2.57409600 | 1.87693600  |
| H | -0.56249100 | -0.91275800 | 3.01344300  |
| H | -1.79808700 | -4.23960500 | 0.59991500  |
| C | -2.65668700 | -2.56216700 | 2.56603700  |
| H | -3.12206600 | -1.57078600 | 2.49700500  |
| H | -3.34697500 | -3.29207900 | 2.12939000  |
| H | -2.55365600 | -2.79383100 | 3.63349300  |
| H | 1.71686000  | -0.62449100 | -3.28214300 |
| H | 1.36015200  | -2.26075700 | -2.74309400 |
| O | -5.97073700 | 1.47862900  | 0.20279400  |
| C | -6.34743600 | 2.83120700  | 0.06609300  |
| H | -7.34648000 | 2.92055500  | 0.49845800  |
| H | -5.66448800 | 3.49961700  | 0.60864600  |

|   |             |            |             |
|---|-------------|------------|-------------|
| H | -6.38816400 | 3.13715200 | -0.98848400 |
| C | 2.92747800  | 2.59059800 | 0.07035800  |
| C | 1.93781700  | 3.55863700 | -0.16138800 |
| C | 4.07343700  | 2.94595300 | 0.79762800  |
| C | 2.09744300  | 4.85109800 | 0.31762500  |
| H | 1.04767600  | 3.27819000 | -0.72057500 |
| C | 4.21725500  | 4.23773200 | 1.28520400  |
| H | 4.84144000  | 2.19626700 | 0.97378000  |
| C | 3.23401800  | 5.19443000 | 1.04521800  |
| H | 1.32619600  | 5.59472000 | 0.12915500  |
| H | 5.10700500  | 4.50165200 | 1.85258700  |
| H | 3.35362700  | 6.20629900 | 1.42563600  |

#### **A8**

|   |             |             |             |
|---|-------------|-------------|-------------|
| C | 1.92948000  | 1.33574200  | -0.93852800 |
| C | 1.70885600  | 0.13877000  | -1.18622900 |
| N | 1.26863300  | -0.97166500 | -1.81046200 |
| C | 0.12660400  | -0.85222200 | -2.75606500 |
| C | -1.09239200 | -0.39269300 | -2.11528500 |
| C | -2.09115500 | 0.00027400  | -1.54933400 |
| C | -3.26989000 | 0.43933000  | -0.88067500 |
| C | -4.14960500 | -0.49392200 | -0.30208400 |
| C | -3.57985800 | 1.80090900  | -0.78068600 |
| C | -5.28770400 | -0.07606200 | 0.35578600  |
| H | -3.91950500 | -1.55516000 | -0.38124400 |
| C | -4.72207900 | 2.23109300  | -0.11844100 |
| H | -2.91433300 | 2.53200200  | -1.23511300 |
| C | -5.58254200 | 1.29093800  | 0.45644700  |
| H | -5.97995500 | -0.78687400 | 0.80095200  |
| H | -4.93896800 | 3.29343500  | -0.05859300 |
| S | 1.50286200  | -2.48003800 | -1.01643100 |



|   |             |             |             |
|---|-------------|-------------|-------------|
| O | 2.63347500  | -2.21052900 | -0.11477500 |
| O | 1.59977100  | -3.47127200 | -2.06671600 |
| C | 0.05354800  | -2.75116000 | -0.06252100 |
| C | -0.12357000 | -2.03251200 | 1.12111100  |
| C | -0.92119500 | -3.61789800 | -0.54893000 |
| C | -1.30523900 | -2.19422500 | 1.82340300  |
| H | 0.65124000  | -1.36338100 | 1.48912100  |
| C | -2.09393900 | -3.76969500 | 0.17745000  |
| H | -0.75688500 | -4.16536100 | -1.47389500 |
| C | -2.30368200 | -3.06457200 | 1.36635000  |
| H | -1.46388800 | -1.64152600 | 2.74750000  |
| H | -2.86450800 | -4.44756400 | -0.18490400 |
| C | -3.56809600 | -3.23600700 | 2.14476400  |
| H | -3.89970000 | -2.28759300 | 2.58166100  |
| H | -4.37576200 | -3.63409200 | 1.52133300  |
| H | -3.42051700 | -3.93912700 | 2.97461500  |
| H | 0.45136900  | -0.16698300 | -3.54802100 |
| H | 0.00409300  | -1.83716600 | -3.22507900 |
| O | -6.71067900 | 1.59756000  | 1.12278300  |
| C | -7.06443000 | 2.96030900  | 1.24447500  |
| H | -7.99188600 | 2.98762300  | 1.81993700  |
| H | -6.29435100 | 3.53069300  | 1.78148600  |
| H | -7.23940600 | 3.42187900  | 0.26315800  |
| C | 2.02055500  | 2.71830800  | -0.59641200 |
| C | 0.87965000  | 3.38401500  | -0.11855000 |
| C | 3.22545900  | 3.42148000  | -0.75404900 |
| C | 0.94703000  | 4.73518600  | 0.18501900  |
| H | -0.04840500 | 2.82910100  | 0.00092500  |
| C | 3.28475800  | 4.76936700  | -0.43413800 |
| H | 4.10217100  | 2.89883900  | -1.13192700 |
| C | 2.14736800  | 5.42612100  | 0.03150900  |

|    |            |             |             |
|----|------------|-------------|-------------|
| H  | 0.06275900 | 5.25299000  | 0.54745100  |
| H  | 4.21779100 | 5.31334400  | -0.55519000 |
| H  | 2.19627400 | 6.48448900  | 0.27537700  |
| Cu | 3.16924100 | -0.06642200 | 0.17846200  |
| N  | 4.56364200 | -0.07525600 | 1.48020300  |
| C  | 5.44627300 | -0.18498500 | 2.21982800  |
| C  | 6.54722700 | -0.32416800 | 3.13868100  |
| H  | 7.49106600 | -0.14805600 | 2.61363600  |
| H  | 6.44874900 | 0.40220600  | 3.95100500  |
| H  | 6.55371400 | -1.33482400 | 3.55743200  |

### TS<sub>A8</sub>

Number of imaginary frequencies: 1

Lowest frequency (cm<sup>-1</sup>): -431.4

|   |             |             |             |
|---|-------------|-------------|-------------|
| C | 0.37013100  | -0.57925600 | -0.23895500 |
| C | -0.85849100 | -0.56815200 | -0.66279400 |
| N | -1.35691400 | 0.39710500  | -1.50215300 |
| C | -0.46254100 | 1.54449900  | -1.80386800 |
| C | 0.85315800  | 1.25092800  | -1.24938200 |
| C | 2.05772900  | 1.39909100  | -1.02874000 |
| C | 3.40168500  | 1.35550200  | -0.64015400 |
| C | 3.84949800  | 2.05537700  | 0.50493900  |
| C | 4.31321100  | 0.54398800  | -1.34273900 |
| C | 5.15076400  | 1.93647700  | 0.92758800  |
| H | 3.14885100  | 2.68484700  | 1.04880600  |
| C | 5.62050100  | 0.41182900  | -0.91589800 |
| H | 3.96892800  | 0.00377800  | -2.22175000 |
| C | 6.04629700  | 1.10770200  | 0.22591400  |
| H | 5.51754500  | 2.46457200  | 1.80353700  |
| H | 6.30480500  | -0.22547800 | -1.46681400 |
| S | -3.02873700 | 0.63637800  | -1.63266900 |

|   |             |             |             |
|---|-------------|-------------|-------------|
| O | -3.62220500 | -0.67835200 | -1.40052400 |
| O | -3.21743600 | 1.35585500  | -2.87897700 |
| C | -3.45364400 | 1.69762100  | -0.28544600 |
| C | -3.61148300 | 1.15356300  | 0.98876700  |
| C | -3.59339900 | 3.06493800  | -0.51376600 |
| C | -3.90906500 | 2.00090800  | 2.04492700  |
| H | -3.52523200 | 0.07983900  | 1.14426700  |
| C | -3.89351900 | 3.89451500  | 0.55797000  |
| H | -3.49165000 | 3.46182600  | -1.52098700 |
| C | -4.05070500 | 3.37967000  | 1.84796800  |
| H | -4.04620100 | 1.58885300  | 3.04314000  |
| H | -4.01865300 | 4.96292100  | 0.39146000  |
| C | -4.34898100 | 4.28727700  | 2.99887800  |
| H | -4.88596400 | 3.76485400  | 3.79725600  |
| H | -3.42076700 | 4.67960500  | 3.43444100  |
| H | -4.94783600 | 5.14937000  | 2.68745000  |
| H | -0.41363600 | 1.69188600  | -2.88848800 |
| H | -0.86310000 | 2.46565200  | -1.35216300 |
| O | 7.28301200  | 1.04574600  | 0.72541000  |
| C | 8.24745500  | 0.23939000  | 0.06731700  |
| H | 9.16998100  | 0.33981900  | 0.64114700  |
| H | 7.94538300  | -0.81556500 | 0.05446500  |
| H | 8.42382600  | 0.58634800  | -0.95844300 |
| C | 1.50714700  | -1.26221000 | 0.28807500  |
| C | 2.17146300  | -0.76972200 | 1.42473300  |
| C | 2.00509200  | -2.40947500 | -0.35703500 |
| C | 3.29774800  | -1.41646000 | 1.91114500  |
| H | 1.78581100  | 0.12272000  | 1.91411700  |
| C | 3.12129200  | -3.06187600 | 0.14545800  |
| H | 1.49502100  | -2.77592200 | -1.24582100 |
| C | 3.77055400  | -2.56193200 | 1.27350800  |

|    |             |             |             |
|----|-------------|-------------|-------------|
| H  | 3.80867900  | -1.02982700 | 2.78957300  |
| H  | 3.49382600  | -3.95698500 | -0.34636500 |
| H  | 4.65134800  | -3.07008600 | 1.65931400  |
| Cu | -1.96075700 | -2.04539000 | -0.08038300 |
| N  | -2.98432400 | -3.52376300 | 0.50349700  |
| C  | -3.67515700 | -4.41586100 | 0.75926500  |
| C  | -4.53674700 | -5.52756400 | 1.07370100  |
| H  | -5.57431300 | -5.26900300 | 0.84149900  |
| H  | -4.24576600 | -6.40104200 | 0.48232200  |
| H  | -4.45738800 | -5.77272900 | 2.13692800  |

### **B8**

|   |             |             |             |
|---|-------------|-------------|-------------|
| C | 0.32980000  | -0.91090900 | -0.22038900 |
| C | -0.95050700 | -0.61671000 | -0.63001300 |
| N | -0.92532300 | 0.55945500  | -1.35814900 |
| C | 0.39729400  | 1.19521500  | -1.37147700 |
| C | 1.23420700  | 0.15784800  | -0.65090100 |
| C | 2.52602100  | 0.28338000  | -0.48605500 |
| C | 3.85499600  | 0.46039300  | -0.27356200 |
| C | 4.33719100  | 1.10894700  | 0.91285400  |
| C | 4.81366400  | -0.02106700 | -1.22156000 |
| C | 5.67447200  | 1.26367000  | 1.12352200  |
| H | 3.61240300  | 1.47204500  | 1.63667200  |
| C | 6.15749700  | 0.11863400  | -1.00609700 |
| H | 4.44701700  | -0.51305700 | -2.11972100 |
| C | 6.59994800  | 0.76443900  | 0.17316600  |
| H | 6.06901700  | 1.75134000  | 2.01034900  |
| H | 6.86943900  | -0.26151300 | -1.73130900 |
| S | -2.29451000 | 1.46495600  | -1.74344600 |
| O | -3.36619700 | 0.50494600  | -1.96598100 |
| O | -1.85354500 | 2.38335700  | -2.78027900 |

|   |             |             |             |
|---|-------------|-------------|-------------|
| C | -2.65740000 | 2.39338600  | -0.28228300 |
| C | -3.41267300 | 1.80834500  | 0.73360200  |
| C | -2.14006500 | 3.67919900  | -0.15034100 |
| C | -3.64355200 | 2.52868700  | 1.89577100  |
| H | -3.82804600 | 0.81067000  | 0.60302900  |
| C | -2.38259600 | 4.38291000  | 1.02217800  |
| H | -1.57721200 | 4.12593300  | -0.96640000 |
| C | -3.13374200 | 3.82220200  | 2.05838900  |
| H | -4.23734700 | 2.08640200  | 2.69411600  |
| H | -1.98966700 | 5.39191900  | 1.13478300  |
| C | -3.42256400 | 4.59952000  | 3.30352500  |
| H | -3.42711400 | 3.95496500  | 4.18927500  |
| H | -2.68955100 | 5.39713700  | 3.46104400  |
| H | -4.41153600 | 5.07191000  | 3.24439400  |
| H | 0.73781700  | 1.37750600  | -2.39509600 |
| H | 0.38888100  | 2.15004000  | -0.82704300 |
| O | 7.86684900  | 0.94755700  | 0.47804200  |
| C | 8.89294500  | 0.47094200  | -0.39653700 |
| H | 9.83545000  | 0.73452400  | 0.08348500  |
| H | 8.83208900  | -0.61681500 | -0.51008700 |
| H | 8.83010900  | 0.96146300  | -1.37373000 |
| C | 0.76401100  | -2.10832100 | 0.50413400  |
| C | 2.03795800  | -2.65412100 | 0.30640700  |
| C | -0.09091600 | -2.74948800 | 1.41366000  |
| C | 2.44345200  | -3.79846900 | 0.98475900  |
| H | 2.70997800  | -2.19850300 | -0.42066700 |
| C | 0.31010700  | -3.89651500 | 2.08443600  |
| H | -1.07505900 | -2.32121500 | 1.60387200  |
| C | 1.58127700  | -4.42742500 | 1.87589100  |
| H | 3.43614100  | -4.20686100 | 0.80759400  |
| H | -0.36909100 | -4.37087100 | 2.78969600  |

|    |             |             |             |
|----|-------------|-------------|-------------|
| H  | 1.89642300  | -5.32174800 | 2.40798900  |
| Cu | -2.56223900 | -1.62356800 | -0.41028900 |
| N  | -4.15722200 | -2.61382200 | -0.19640300 |
| C  | -5.15137900 | -3.20397300 | -0.15044900 |
| C  | -6.38914400 | -3.94111200 | -0.09522200 |
| H  | -6.69426500 | -4.08089300 | 0.94603800  |
| H  | -7.17216100 | -3.39309000 | -0.62774000 |
| H  | -6.25746400 | -4.92107600 | -0.56384600 |

### TS<sub>B8</sub>

Number of imaginary frequencies: 1

Lowest frequency (cm<sup>-1</sup>): -320.3

|   |             |             |             |
|---|-------------|-------------|-------------|
| C | 0.18676900  | -1.24055900 | 0.16838800  |
| C | -1.07814100 | -0.79932300 | -0.22921700 |
| N | -0.88262400 | 0.38446800  | -0.87797700 |
| C | 0.52379400  | 0.81911200  | -0.94536100 |
| C | 1.20799000  | -0.35571900 | -0.30707000 |
| C | 2.51243100  | -0.68769300 | -0.27806900 |
| C | 3.79007500  | -0.10888900 | -0.16530900 |
| C | 4.00699400  | 1.10728800  | 0.53485800  |
| C | 4.90178600  | -0.74136400 | -0.76466200 |
| C | 5.25609300  | 1.67156000  | 0.59223300  |
| H | 3.16575200  | 1.59250800  | 1.02650000  |
| C | 6.16299600  | -0.18584900 | -0.71022500 |
| H | 4.74071700  | -1.68659100 | -1.27918300 |
| C | 6.34528000  | 1.03310600  | -0.03451600 |
| H | 5.44153100  | 2.60725100  | 1.11301200  |
| H | 6.99954100  | -0.68679300 | -1.18746300 |
| S | -2.12048600 | 1.32862500  | -1.57838300 |
| O | -3.28476100 | 0.45792300  | -1.66741800 |
| O | -1.52167100 | 1.94146000  | -2.75001700 |

|   |             |             |             |
|---|-------------|-------------|-------------|
| C | -2.41473200 | 2.56692400  | -0.35680300 |
| C | -3.23596800 | 2.26331300  | 0.72778500  |
| C | -1.79912300 | 3.80925000  | -0.48209500 |
| C | -3.43845300 | 3.22983300  | 1.69999700  |
| H | -3.71739100 | 1.29017200  | 0.79966700  |
| C | -2.01851200 | 4.76337400  | 0.50272200  |
| H | -1.17532600 | 4.02575300  | -1.34614900 |
| C | -2.83813000 | 4.49107700  | 1.60185900  |
| H | -4.07930800 | 3.00977200  | 2.55197600  |
| H | -1.55200300 | 5.74282500  | 0.41434900  |
| C | -3.09679800 | 5.53659300  | 2.63944300  |
| H | -3.23577500 | 5.09453800  | 3.63172400  |
| H | -2.27913700 | 6.26211800  | 2.69505800  |
| H | -4.01151800 | 6.09595000  | 2.40422200  |
| H | 0.81545300  | 1.02090100  | -1.98117000 |
| H | 0.67348600  | 1.73375500  | -0.35372600 |
| O | 7.51440300  | 1.66079300  | 0.07284500  |
| C | 8.66329300  | 1.08247700  | -0.53128500 |
| H | 9.48877100  | 1.76565100  | -0.32680300 |
| H | 8.88855400  | 0.10197800  | -0.09441300 |
| H | 8.53371800  | 0.98595900  | -1.61598800 |
| C | 0.66821500  | -2.45415800 | 0.74940100  |
| C | 2.03899200  | -2.42024100 | 1.11486600  |
| C | -0.01184000 | -3.68359200 | 0.77741400  |
| C | 2.73946100  | -3.61337200 | 1.37442600  |
| C | 0.68221800  | -4.84066800 | 1.06821300  |
| H | -1.06417200 | -3.72085200 | 0.49743800  |
| C | 2.06441600  | -4.81442300 | 1.34077200  |
| H | 3.79184400  | -3.57284000 | 1.64652200  |
| H | 0.16115200  | -5.79528700 | 1.05463300  |
| H | 2.58769700  | -5.74328400 | 1.55321500  |

|    |             |             |             |
|----|-------------|-------------|-------------|
| Cu | -2.81166600 | -1.60575100 | -0.14983400 |
| N  | -4.49971200 | -2.44905500 | -0.09103100 |
| C  | -5.54976300 | -2.93409000 | -0.11944100 |
| C  | -6.85802700 | -3.53814300 | -0.15575900 |
| H  | -6.91352100 | -4.25091800 | -0.98414500 |
| H  | -7.05156900 | -4.06485300 | 0.78362600  |
| H  | -7.61971400 | -2.76559100 | -0.29708400 |
| H  | 2.42200700  | -1.49758300 | 1.55788000  |

### C1

|   |             |             |             |
|---|-------------|-------------|-------------|
| C | -0.00164600 | -1.40294500 | 0.07090800  |
| C | -1.23178500 | -0.80464600 | -0.30232600 |
| N | -0.88485300 | 0.37577600  | -0.84450400 |
| C | 0.57896500  | 0.67961200  | -0.89187800 |
| C | 1.12086300  | -0.55594700 | -0.26025200 |
| C | 2.29860300  | -1.10970800 | 0.13208700  |
| C | 3.64749100  | -0.56971500 | 0.04840100  |
| C | 4.65785600  | -0.95964900 | 0.94646400  |
| C | 3.98196300  | 0.37772500  | -0.92768500 |
| C | 5.93109000  | -0.43057400 | 0.86855600  |
| H | 4.43779900  | -1.67068500 | 1.74092200  |
| C | 5.25988900  | 0.91318200  | -1.02237100 |
| H | 3.23444200  | 0.68728400  | -1.65636300 |
| C | 6.24759900  | 0.50761100  | -0.12088900 |
| H | 6.70923300  | -0.72590300 | 1.56779500  |
| H | 5.47910200  | 1.63675400  | -1.80194500 |
| S | -2.02258900 | 1.51342000  | -1.48316300 |
| O | -3.29040000 | 0.80029600  | -1.53987500 |
| O | -1.38860700 | 2.05663100  | -2.66894900 |
| C | -2.07398600 | 2.73241800  | -0.21534200 |
| C | -2.81784000 | 2.47512900  | 0.93491900  |



|    |             |             |             |
|----|-------------|-------------|-------------|
| C  | -1.34206100 | 3.90820400  | -0.36938700 |
| C  | -2.82202000 | 3.42153700  | 1.94747100  |
| H  | -3.38938800 | 1.55383900  | 1.02797400  |
| C  | -1.36484400 | 4.84188700  | 0.65618700  |
| H  | -0.77960600 | 4.08821000  | -1.28227700 |
| C  | -2.10014100 | 4.61453300  | 1.82450100  |
| H  | -3.39848200 | 3.23845800  | 2.85213000  |
| H  | -0.80487200 | 5.76940800  | 0.55150000  |
| C  | -2.13225700 | 5.64262600  | 2.90910200  |
| H  | -1.14512600 | 6.09147800  | 3.06479800  |
| H  | -2.81678500 | 6.45952800  | 2.64746900  |
| H  | -2.47353200 | 5.21944800  | 3.85894100  |
| H  | 0.86954100  | 0.83367500  | -1.93798700 |
| H  | 0.79081800  | 1.60313900  | -0.33388000 |
| O  | 7.51806600  | 0.95670600  | -0.12249900 |
| C  | 7.89918200  | 1.87222800  | -1.12766000 |
| H  | 8.95902500  | 2.08153900  | -0.96848100 |
| H  | 7.76674600  | 1.44782500  | -2.13230700 |
| H  | 7.33750500  | 2.81367400  | -1.05530000 |
| C  | 0.44617300  | -2.56763500 | 0.66404700  |
| C  | 1.92471400  | -2.39650000 | 0.84861600  |
| C  | -0.17391700 | -3.78493300 | 1.02036300  |
| C  | 2.69562100  | -3.66643600 | 0.85906900  |
| C  | 0.61803500  | -4.87584800 | 1.24989900  |
| H  | -1.25868600 | -3.86955000 | 1.00980600  |
| C  | 2.05009400  | -4.82581100 | 1.11397100  |
| H  | 3.77785300  | -3.63463100 | 0.75818300  |
| H  | 0.15507700  | -5.83196800 | 1.48346900  |
| H  | 2.61134100  | -5.75237400 | 1.20242400  |
| Cu | -3.03151500 | -1.44701700 | -0.24645800 |
| N  | -4.76035000 | -2.20013400 | -0.20726400 |

|   |             |             |             |
|---|-------------|-------------|-------------|
| C | -5.84002400 | -2.61183800 | -0.26675200 |
| C | -7.18544300 | -3.12236500 | -0.34490800 |
| H | -7.72718300 | -2.60994200 | -1.14567400 |
| H | -7.16505900 | -4.19545800 | -0.55673400 |
| H | -7.70366800 | -2.95342000 | 0.60375100  |
| H | 1.98017200  | -2.08295600 | 1.92193700  |

### TSc1

Number of imaginary frequencies: 1

Lowest frequency ( $\text{cm}^{-1}$ ): -1024.6

|   |             |             |             |
|---|-------------|-------------|-------------|
| C | 0.01759400  | -1.41897500 | 0.05704200  |
| C | -1.22803400 | -0.83023600 | -0.28672500 |
| N | -0.91991000 | 0.40005300  | -0.73409500 |
| C | 0.53084600  | 0.72970000  | -0.74887800 |
| C | 1.08492300  | -0.53244900 | -0.19842300 |
| C | 2.30464700  | -1.08101000 | 0.19135500  |
| C | 3.66191100  | -0.54067600 | 0.06805400  |
| C | 4.64474700  | -0.75703400 | 1.04691600  |
| C | 4.00456800  | 0.22422700  | -1.04836200 |
| C | 5.91588900  | -0.23511800 | 0.90671300  |
| H | 4.40511300  | -1.32282000 | 1.94724800  |
| C | 5.27982200  | 0.75777800  | -1.20000500 |
| H | 3.26877800  | 0.38739400  | -1.83456300 |
| C | 6.24707900  | 0.52753700  | -0.21955100 |
| H | 6.67729500  | -0.39303200 | 1.66625900  |
| H | 5.51192700  | 1.33854900  | -2.08771400 |
| S | -2.07865500 | 1.50906700  | -1.38489500 |
| O | -3.33927800 | 0.78076900  | -1.38783500 |
| O | -1.48045300 | 2.02069500  | -2.60344300 |
| C | -2.11559400 | 2.77270900  | -0.16187900 |
| C | -2.80099200 | 2.53955900  | 1.03145100  |

|    |             |             |             |
|----|-------------|-------------|-------------|
| C  | -1.44733300 | 3.96879900  | -0.40315800 |
| C  | -2.81020400 | 3.53385400  | 1.99383500  |
| H  | -3.32583300 | 1.60001100  | 1.19307000  |
| C  | -1.47467900 | 4.95356000  | 0.57616900  |
| H  | -0.93128300 | 4.12663000  | -1.34694800 |
| C  | -2.15103700 | 4.75327800  | 1.78154000  |
| H  | -3.34179100 | 3.37359900  | 2.93037100  |
| H  | -0.96607300 | 5.89947100  | 0.40097700  |
| C  | -2.18974700 | 5.81694200  | 2.83143400  |
| H  | -3.21810500 | 6.15646800  | 3.00540800  |
| H  | -1.81378700 | 5.44018400  | 3.79012300  |
| H  | -1.59105600 | 6.68782100  | 2.54855800  |
| H  | 0.83041700  | 0.95685000  | -1.77943000 |
| H  | 0.72808400  | 1.61554800  | -0.12948200 |
| O  | 7.51041300  | 0.99432400  | -0.26563900 |
| C  | 7.88290300  | 1.78910900  | -1.37216500 |
| H  | 8.92461900  | 2.07370400  | -1.21087400 |
| H  | 7.80889600  | 1.23156300  | -2.31592200 |
| H  | 7.27084100  | 2.69915000  | -1.44023300 |
| C  | 0.50411700  | -2.61656300 | 0.62308200  |
| C  | 1.93783600  | -2.45151600 | 0.74928100  |
| C  | -0.09365300 | -3.82534400 | 1.01032500  |
| C  | 2.74907700  | -3.56264600 | 1.13653800  |
| C  | 0.70993000  | -4.85938300 | 1.43494900  |
| H  | -1.17310100 | -3.94520500 | 0.94033000  |
| C  | 2.12193000  | -4.73065600 | 1.47875700  |
| H  | 3.83171600  | -3.47176300 | 1.16650000  |
| H  | 0.26005300  | -5.80470800 | 1.72806200  |
| H  | 2.71882300  | -5.58657600 | 1.78348900  |
| Cu | -3.00118200 | -1.53968100 | -0.31792900 |
| N  | -4.70350500 | -2.35353800 | -0.34075200 |

|   |             |             |             |
|---|-------------|-------------|-------------|
| C | -5.76966700 | -2.79647800 | -0.41622200 |
| C | -7.09909000 | -3.34448400 | -0.51256400 |
| H | -7.04635300 | -4.41673300 | -0.72304100 |
| H | -7.63390100 | -3.18922000 | 0.42916600  |
| H | -7.64439000 | -2.84725500 | -1.32041100 |
| H | 2.07358300  | -1.50278000 | 1.51953700  |

**D1**

|   |             |             |             |
|---|-------------|-------------|-------------|
| C | 0.41693700  | -0.88698000 | 0.65020500  |
| C | -0.79040200 | -0.73090600 | -0.11393900 |
| N | -0.75109800 | 0.52877200  | -0.56255700 |
| C | 0.44283000  | 1.29217500  | -0.14214600 |
| C | 1.13470200  | 0.27036200  | 0.65917800  |
| C | 2.41404000  | 0.12943800  | 1.41996900  |
| C | 3.64963900  | 0.51575000  | 0.63601700  |
| C | 4.50430300  | 1.52190500  | 1.09136800  |
| C | 3.95884500  | -0.12997500 | -0.55992400 |
| C | 5.63438200  | 1.87526400  | 0.37253100  |
| H | 4.28212400  | 2.03484300  | 2.02641000  |
| C | 5.08725300  | 0.21427000  | -1.29547100 |
| H | 3.31166300  | -0.92880500 | -0.92372600 |
| C | 5.93404100  | 1.22418800  | -0.82845300 |
| H | 6.30763300  | 2.65399200  | 0.72219300  |
| H | 5.30055100  | -0.31116400 | -2.22140200 |
| S | -1.99806400 | 1.27666700  | -1.52532600 |
| O | -2.79041600 | 0.17151100  | -2.03769300 |
| O | -1.27778400 | 2.18958700  | -2.38996200 |
| C | -2.91735600 | 2.17620100  | -0.32644000 |
| C | -3.89632900 | 1.51452500  | 0.41342800  |
| C | -2.63118000 | 3.52573900  | -0.12691300 |
| C | -4.59619800 | 2.22866500  | 1.37327200  |

|    |             |             |             |
|----|-------------|-------------|-------------|
| H  | -4.11350300 | 0.46422200  | 0.23049400  |
| C  | -3.34556700 | 4.21860500  | 0.83882500  |
| H  | -1.87605700 | 4.02287900  | -0.73089200 |
| C  | -4.33448400 | 3.58518600  | 1.59939700  |
| H  | -5.36829900 | 1.73085700  | 1.95671400  |
| H  | -3.14014700 | 5.27444600  | 1.00469400  |
| C  | -5.11872500 | 4.35385700  | 2.61337600  |
| H  | -4.50754100 | 5.12333600  | 3.09624500  |
| H  | -5.96398200 | 4.86673600  | 2.13663500  |
| H  | -5.52954800 | 3.69946800  | 3.38848900  |
| H  | 1.00884400  | 1.61686700  | -1.02604100 |
| H  | 0.14612000  | 2.19032900  | 0.41710500  |
| O  | 7.05329400  | 1.63337400  | -1.46155200 |
| C  | 7.40592900  | 0.99149900  | -2.66806300 |
| H  | 8.33201400  | 1.45966000  | -3.00846500 |
| H  | 7.58454400  | -0.08239900 | -2.51889700 |
| H  | 6.63567100  | 1.12610700  | -3.44029600 |
| C  | 1.13097900  | -1.92155500 | 1.39024800  |
| C  | 2.33033400  | -1.33422800 | 1.83820800  |
| C  | 0.83803200  | -3.25066000 | 1.66507300  |
| C  | 3.25194600  | -2.08114400 | 2.55082200  |
| C  | 1.76672600  | -3.99460600 | 2.38999300  |
| H  | -0.09125700 | -3.70038300 | 1.31847800  |
| C  | 2.95994700  | -3.41827900 | 2.82436100  |
| H  | 4.18886200  | -1.63703200 | 2.88322400  |
| H  | 1.56208400  | -5.03849000 | 2.61566800  |
| H  | 3.67404800  | -4.02045300 | 3.38086800  |
| Cu | -2.17166500 | -1.97277100 | -0.56294400 |
| N  | -3.50515900 | -3.22893100 | -1.01777900 |
| C  | -4.31715300 | -3.98289600 | -1.35059400 |
| C  | -5.32817800 | -4.92186800 | -1.76495500 |

|   |             |             |             |
|---|-------------|-------------|-------------|
| H | -5.78392400 | -4.58572300 | -2.70121500 |
| H | -4.87816800 | -5.90738700 | -1.91865500 |
| H | -6.10291800 | -4.99747000 | -0.99587300 |
| H | 2.36978500  | 0.76740300  | 2.31859700  |

### **TS<sub>E1</sub>**

Number of imaginary frequencies: 1

Lowest frequency (cm<sup>-1</sup>): -221.3

|   |             |             |             |
|---|-------------|-------------|-------------|
| C | 0.40513000  | 1.29534000  | -0.95948800 |
| C | -0.78660900 | 1.15824400  | -0.26509200 |
| N | -0.93435500 | -0.23518800 | -0.16548000 |
| C | 0.17600800  | -0.94722500 | -0.69770100 |
| C | 0.98264200  | 0.02911000  | -1.23709300 |
| C | 2.35924600  | 0.16472800  | -1.83074800 |
| C | 3.34161200  | -0.49601900 | -0.87924900 |
| C | 3.57607600  | -1.87479300 | -0.98063000 |
| C | 3.86936700  | 0.18211400  | 0.21516000  |
| C | 4.30579900  | -2.55109900 | -0.02016500 |
| H | 3.16758700  | -2.42460600 | -1.82875600 |
| C | 4.60333300  | -0.48489900 | 1.20116400  |
| H | 3.69622700  | 1.25259600  | 0.31914100  |
| C | 4.83158300  | -1.86001700 | 1.08139200  |
| H | 4.50279800  | -3.61729700 | -0.10213200 |
| H | 5.01936100  | 0.08036100  | 2.03077800  |
| S | -1.94822200 | -0.98198700 | 0.97735200  |
| O | -2.93432300 | -0.00120500 | 1.39209300  |
| O | -1.06001900 | -1.58442200 | 1.99474400  |
| C | -2.69866500 | -2.28149100 | 0.06574100  |
| C | -3.60664600 | -1.92837100 | -0.93385600 |
| C | -2.40026600 | -3.60855800 | 0.35497700  |
| C | -4.22182200 | -2.93719100 | -1.65359200 |

|    |             |             |             |
|----|-------------|-------------|-------------|
| H  | -3.81933200 | -0.88151300 | -1.14173000 |
| C  | -3.03302300 | -4.60315900 | -0.38040000 |
| H  | -1.69489700 | -3.85576600 | 1.14343900  |
| C  | -3.94856000 | -4.28605900 | -1.38638100 |
| H  | -4.93049200 | -2.68339100 | -2.43965400 |
| H  | -2.81522100 | -5.64789500 | -0.16761100 |
| C  | -4.64436400 | -5.35929700 | -2.15979200 |
| H  | -4.17989100 | -6.33774400 | -2.00505700 |
| H  | -5.69500500 | -5.43736700 | -1.85305400 |
| H  | -4.64206100 | -5.14197600 | -3.23376600 |
| H  | 1.17120800  | -0.73686900 | 0.67975200  |
| H  | 0.13525600  | -2.02304600 | -0.84030200 |
| O  | 5.54274300  | -2.59829900 | 1.95544200  |
| C  | 6.16462300  | -1.93354600 | 3.03608700  |
| H  | 6.71858000  | -2.69476400 | 3.58866500  |
| H  | 6.86552600  | -1.16386600 | 2.68644000  |
| H  | 5.42766200  | -1.47308200 | 3.70932800  |
| C  | 1.32132800  | 2.32509100  | -1.44246500 |
| C  | 2.46636900  | 1.67756800  | -1.95230400 |
| C  | 1.23537500  | 3.71284300  | -1.45882000 |
| C  | 3.52373200  | 2.41262800  | -2.46289800 |
| C  | 2.29924100  | 4.44556300  | -1.98104900 |
| H  | 0.35159300  | 4.21751700  | -1.07187100 |
| C  | 3.43383000  | 3.80517000  | -2.47721900 |
| H  | 4.41266800  | 1.91080900  | -2.84314700 |
| H  | 2.24388600  | 5.53162600  | -2.00197400 |
| H  | 4.25413800  | 4.39516800  | -2.87891000 |
| Cu | -2.03415100 | 2.39077100  | 0.47392700  |
| N  | -3.26808700 | 3.64411200  | 1.15547600  |
| C  | -4.05292300 | 4.36863700  | 1.60035700  |
| C  | -5.03119500 | 5.26910900  | 2.15773500  |

|   |             |             |             |
|---|-------------|-------------|-------------|
| H | -5.99317500 | 5.13040700  | 1.65528800  |
| H | -5.15445800 | 5.06711600  | 3.22601100  |
| H | -4.70384000 | 6.30445400  | 2.02477900  |
| H | 2.43304600  | -0.31879900 | -2.81579800 |
| O | 1.35273800  | -0.68050300 | 1.71482800  |
| H | 2.22264200  | -1.06478600 | 1.94450600  |
| H | 0.54877700  | -1.12140500 | 2.12526300  |

**F1**

|   |             |             |             |
|---|-------------|-------------|-------------|
| C | -0.27843300 | -1.42251200 | -0.99102100 |
| C | 0.94165700  | -1.18295300 | -0.38236300 |
| N | 1.04926700  | 0.23949200  | -0.47168300 |
| C | -0.10906000 | 0.82912300  | -1.02251700 |
| C | -0.92421700 | -0.19678900 | -1.36788500 |
| C | -2.33795000 | -0.45068800 | -1.82358400 |
| C | -3.27595600 | 0.20564400  | -0.82460600 |
| C | -3.65829000 | 1.54010400  | -1.00117000 |
| C | -3.65893500 | -0.43374700 | 0.35660600  |
| C | -4.38663200 | 2.21103400  | -0.03501200 |
| H | -3.37481700 | 2.06134500  | -1.91527900 |
| C | -4.38710400 | 0.23364500  | 1.34798900  |
| H | -3.43202100 | -1.49274700 | 0.49549100  |
| C | -4.75272200 | 1.56762400  | 1.15388100  |
| H | -4.69243900 | 3.24519500  | -0.17509200 |
| H | -4.68613700 | -0.30524100 | 2.24279300  |
| S | 1.89893900  | 1.06382300  | 0.74090500  |
| O | 3.10684800  | 0.31126900  | 1.02733100  |
| O | 0.93114600  | 1.28250900  | 1.84976900  |
| C | 2.26626000  | 2.61847000  | 0.02172100  |
| C | 3.26706700  | 2.66200300  | -0.95008000 |
| C | 1.57888500  | 3.75896700  | 0.42753700  |



|    |             |             |             |
|----|-------------|-------------|-------------|
| C  | 3.57516700  | 3.88358500  | -1.52342300 |
| H  | 3.79482900  | 1.75663100  | -1.24238200 |
| C  | 1.90827800  | 4.97145400  | -0.16224900 |
| H  | 0.81282300  | 3.69611600  | 1.19593700  |
| C  | 2.90265000  | 5.05229400  | -1.14151300 |
| H  | 4.35558900  | 3.94135200  | -2.27977100 |
| H  | 1.38766300  | 5.87596700  | 0.14567300  |
| C  | 3.23611900  | 6.35821100  | -1.78726900 |
| H  | 4.31263600  | 6.45345000  | -1.96487700 |
| H  | 2.74164200  | 6.44469500  | -2.76339100 |
| H  | 2.91009300  | 7.20636400  | -1.17743300 |
| H  | -0.51019300 | -1.03397600 | 1.03186400  |
| H  | -0.20382700 | 1.90608400  | -1.10294000 |
| O  | -5.45401700 | 2.30807200  | 2.03495400  |
| C  | -5.88559600 | 1.68932100  | 3.22921300  |
| H  | -6.43888600 | 2.44754100  | 3.78679500  |
| H  | -6.55156800 | 0.83928100  | 3.02712200  |
| H  | -5.03725100 | 1.34902700  | 3.83942200  |
| C  | -1.17111500 | -2.52678600 | -1.33505000 |
| C  | -2.37150200 | -1.97257000 | -1.82386200 |
| C  | -1.01690300 | -3.90613600 | -1.23591700 |
| C  | -3.42208100 | -2.79657300 | -2.19626400 |
| C  | -2.07301400 | -4.72673900 | -1.62202700 |
| H  | -0.08594600 | -4.33468800 | -0.86804900 |
| C  | -3.26511000 | -4.17905900 | -2.09598400 |
| H  | -4.35634700 | -2.37052500 | -2.55949400 |
| H  | -1.96770600 | -5.80704400 | -1.55485700 |
| H  | -4.07935100 | -4.83622600 | -2.39189800 |
| Cu | 2.35120600  | -2.25510900 | 0.32062600  |
| N  | 3.73980000  | -3.34313800 | 0.98959400  |
| C  | 4.62136200  | -3.96838400 | 1.40296300  |

|   |             |             |             |
|---|-------------|-------------|-------------|
| C | 5.71968000  | -4.74635200 | 1.91941500  |
| H | 6.64074200  | -4.15706100 | 1.88341600  |
| H | 5.51847800  | -5.02979400 | 2.95689200  |
| H | 5.85024400  | -5.65189100 | 1.31961900  |
| H | -2.54195800 | -0.04750800 | -2.82549100 |
| O | -0.91668800 | -0.47963400 | 1.77655300  |
| H | -1.79838100 | -0.15961800 | 1.46108800  |
| H | -0.25274300 | 0.29493500  | 1.92280200  |

### TS<sub>F1</sub>

Number of imaginary frequencies: 1

Lowest frequency (cm<sup>-1</sup>): -366.9

|   |             |             |             |
|---|-------------|-------------|-------------|
| C | -0.29930300 | -1.37794500 | -0.98713500 |
| C | 0.88442600  | -1.16040200 | -0.28908700 |
| N | 1.02700000  | 0.26938300  | -0.38527000 |
| C | -0.09835000 | 0.86287300  | -0.95886700 |
| C | -0.91761900 | -0.14788600 | -1.35712700 |
| C | -2.32857300 | -0.37664500 | -1.83434700 |
| C | -3.28202600 | 0.24182200  | -0.82511400 |
| C | -3.73855100 | 1.55177100  | -0.99815100 |
| C | -3.62453300 | -0.42155300 | 0.35472500  |
| C | -4.50778400 | 2.17582100  | -0.03046900 |
| H | -3.48563900 | 2.09155100  | -1.91052200 |
| C | -4.39581500 | 0.19449800  | 1.34183500  |
| H | -3.32972000 | -1.46368400 | 0.49405700  |
| C | -4.84176500 | 1.50405300  | 1.15116900  |
| H | -4.87414500 | 3.19055500  | -0.16713700 |
| H | -4.66293100 | -0.36339500 | 2.23462000  |
| S | 1.95581100  | 1.08404500  | 0.79037800  |
| O | 3.17103800  | 0.30747700  | 0.96921300  |
| O | 1.07244300  | 1.29072700  | 1.95658500  |

|   |             |             |             |
|---|-------------|-------------|-------------|
| C | 2.28875200  | 2.63665900  | 0.05150000  |
| C | 3.26378700  | 2.69171200  | -0.94559400 |
| C | 1.58703500  | 3.76598600  | 0.46436700  |
| C | 3.53094100  | 3.91379500  | -1.53770000 |
| H | 3.80054500  | 1.79393200  | -1.24395300 |
| C | 1.87437000  | 4.97926200  | -0.14559300 |
| H | 0.83800500  | 3.69082600  | 1.24873900  |
| C | 2.84502700  | 5.07202000  | -1.14742100 |
| H | 4.28780300  | 3.98052800  | -2.31706800 |
| H | 1.33865400  | 5.87489500  | 0.16228100  |
| C | 3.16848600  | 6.38592700  | -1.78161700 |
| H | 4.10877600  | 6.78599000  | -1.38129800 |
| H | 3.30078400  | 6.28554800  | -2.86443100 |
| H | 2.38760200  | 7.12945800  | -1.59589000 |
| H | 0.00550900  | -1.16746500 | 1.00431900  |
| H | -0.19255400 | 1.94127000  | -1.02646500 |
| O | -5.59479000 | 2.19384500  | 2.03328200  |
| C | -5.99939200 | 1.53555200  | 3.21488200  |
| H | -6.60902300 | 2.24841100  | 3.77377300  |
| H | -6.60414200 | 0.64486300  | 2.99489700  |
| H | -5.13852200 | 1.24370700  | 3.83268800  |
| C | -1.19627800 | -2.46846800 | -1.34229000 |
| C | -2.37466600 | -1.89672100 | -1.86292900 |
| C | -1.05895100 | -3.85001100 | -1.23761500 |
| C | -3.42385600 | -2.70753900 | -2.26600000 |
| C | -2.11373400 | -4.65644100 | -1.65272200 |
| H | -0.14315300 | -4.28870400 | -0.84474200 |
| C | -3.28395800 | -4.09123900 | -2.16193000 |
| H | -4.34406400 | -2.27108300 | -2.65120500 |
| H | -2.02616600 | -5.73793000 | -1.58260700 |
| H | -4.09711100 | -4.73868800 | -2.48151800 |

|    |             |             |             |
|----|-------------|-------------|-------------|
| Cu | 2.33095200  | -2.24909400 | 0.32667300  |
| N  | 3.75146300  | -3.33916200 | 0.91758300  |
| C  | 4.65340400  | -3.97157800 | 1.27164700  |
| C  | 5.77847900  | -4.75996600 | 1.70836700  |
| H  | 6.67873000  | -4.13868500 | 1.73245900  |
| H  | 5.59058000  | -5.15623500 | 2.71069700  |
| H  | 5.93758700  | -5.59334700 | 1.01766500  |
| H  | -2.52516400 | 0.05082800  | -2.82727900 |
| O  | -0.57120400 | -0.78397000 | 1.90210900  |
| H  | -1.46958600 | -0.52467900 | 1.60980200  |
| H  | -0.06970500 | 0.04224000  | 2.16213000  |

#### 4a

|   |             |             |             |
|---|-------------|-------------|-------------|
| C | 0.06507700  | -1.33221100 | 0.77060100  |
| C | 1.11548700  | -0.88772700 | 1.52289800  |
| N | 1.30637900  | 0.44705800  | 1.16871700  |
| C | 0.41432900  | 0.82058600  | 0.16028800  |
| C | -0.36559400 | -0.26763900 | -0.08401600 |
| C | -1.53912500 | -0.69291400 | -0.92551500 |
| C | -2.78094000 | 0.16291600  | -0.82057000 |
| C | -3.51865200 | 0.49259700  | -1.96004700 |
| C | -3.25261000 | 0.59810900  | 0.41627100  |
| C | -4.68598000 | 1.23483700  | -1.87036300 |
| H | -3.16729700 | 0.16129600  | -2.93752500 |
| C | -4.42029100 | 1.34583700  | 0.52624800  |
| H | -2.69390200 | 0.34876000  | 1.31819300  |
| C | -5.14428100 | 1.66772900  | -0.62404400 |
| H | -5.26165700 | 1.49826300  | -2.75463900 |
| H | -4.75690200 | 1.67263600  | 1.50609000  |
| S | 2.70124800  | 1.33911400  | 1.56526200  |
| O | 3.15865100  | 0.79643000  | 2.83189200  |

|   |             |             |             |
|---|-------------|-------------|-------------|
| O | 2.33101900  | 2.73351300  | 1.40492400  |
| C | 3.84741500  | 0.89887400  | 0.29373800  |
| C | 4.62017500  | -0.25072800 | 0.44318800  |
| C | 3.92534700  | 1.68633300  | -0.85019500 |
| C | 5.48495000  | -0.60907100 | -0.57912400 |
| H | 4.54969700  | -0.84532500 | 1.35089900  |
| C | 4.79883300  | 1.30960500  | -1.86159600 |
| H | 3.31882000  | 2.58473400  | -0.93540000 |
| C | 5.58664600  | 0.16198400  | -1.74291800 |
| H | 6.09777900  | -1.50337200 | -0.47809900 |
| H | 4.87319100  | 1.91719000  | -2.76172000 |
| C | 6.54083100  | -0.23059000 | -2.82662800 |
| H | 6.32228500  | 0.28843700  | -3.76532500 |
| H | 7.57343800  | 0.01451200  | -2.54661700 |
| H | 6.50882400  | -1.30943300 | -3.01607900 |
| H | 0.42481900  | 1.83035800  | -0.22803800 |
| O | -6.29046100 | 2.39049700  | -0.63058500 |
| C | -6.77811100 | 2.85656400  | 0.60523900  |
| H | -7.69356800 | 3.41259700  | 0.38887700  |
| H | -7.01960100 | 2.02986700  | 1.28863500  |
| H | -6.06322300 | 3.53034600  | 1.09891200  |
| C | -0.80226400 | -2.48099200 | 0.55775400  |
| C | -1.74806500 | -2.12116000 | -0.42325700 |
| C | -0.83205900 | -3.74732900 | 1.13448400  |
| C | -2.72285800 | -3.02126000 | -0.82121200 |
| C | -1.81127900 | -4.64851900 | 0.72470600  |
| H | -0.10542800 | -4.02664900 | 1.89516000  |
| C | -2.74947000 | -4.29077300 | -0.24304500 |
| H | -3.46361000 | -2.73356300 | -1.56672500 |
| H | -1.84809400 | -5.64132800 | 1.16804400  |
| H | -3.51086800 | -5.00619700 | -0.54593400 |

|   |             |             |             |
|---|-------------|-------------|-------------|
| H | -1.24921500 | -0.73308300 | -1.98778800 |
| H | 1.72116400  | -1.33915900 | 2.29669800  |

**5a**

|   |             |             |             |
|---|-------------|-------------|-------------|
| C | -0.74062200 | 2.23259200  | -0.48885500 |
| C | -0.87348600 | 1.04206800  | -0.69399800 |
| N | -1.01418700 | -0.27510700 | -0.93370100 |
| C | -0.39221100 | -1.22600800 | 0.02925900  |
| C | 1.03117700  | -0.98066800 | 0.15026800  |
| C | 2.21952800  | -0.76412000 | 0.25739400  |
| C | 3.61799600  | -0.51763000 | 0.38211000  |
| C | 4.52441800  | -1.05466800 | -0.54053700 |
| C | 4.11705900  | 0.27144000  | 1.43462900  |
| C | 5.88864500  | -0.82016100 | -0.42789200 |
| H | 4.14988700  | -1.66483900 | -1.35959800 |
| C | 5.47186600  | 0.50835000  | 1.55491100  |
| H | 3.42322700  | 0.69576000  | 2.15700700  |
| C | 6.36848500  | -0.03573500 | 0.62526400  |
| H | 6.56852000  | -1.24768800 | -1.15883200 |
| H | 5.86912100  | 1.11620400  | 2.36430900  |
| S | -2.51111100 | -0.75534800 | -1.63665900 |
| O | -2.33818300 | -2.16269600 | -1.96162100 |
| O | -2.79087300 | 0.23188100  | -2.66424000 |
| C | -3.69221500 | -0.59747800 | -0.33519400 |
| C | -3.95943900 | -1.69919100 | 0.47491100  |
| C | -4.30159800 | 0.63775600  | -0.11270200 |
| C | -4.86089100 | -1.55636700 | 1.52091500  |
| H | -3.47794500 | -2.65446200 | 0.27949300  |
| C | -5.19649100 | 0.75716400  | 0.93989100  |
| H | -4.08718900 | 1.48497900  | -0.75953500 |
| C | -5.49091300 | -0.33276700 | 1.76759100  |

|   |             |             |             |
|---|-------------|-------------|-------------|
| H | -5.08600400 | -2.41003000 | 2.15765600  |
| H | -5.68288700 | 1.71357000  | 1.12468400  |
| C | -6.48320900 | -0.19163900 | 2.87752600  |
| H | -6.40339900 | 0.78751200  | 3.36221700  |
| H | -7.50779800 | -0.27749100 | 2.49292500  |
| H | -6.35133300 | -0.96876300 | 3.63712900  |
| H | -0.88603600 | -1.13432300 | 1.00876900  |
| H | -0.57964500 | -2.23498500 | -0.35495500 |
| O | 7.67036900  | 0.25148600  | 0.82743100  |
| C | 8.61524000  | -0.27135300 | -0.08740100 |
| H | 8.43787000  | 0.09936700  | -1.10572700 |
| H | 9.59448800  | 0.07306000  | 0.25165700  |
| H | 8.60435300  | -1.36932400 | -0.09555500 |
| C | -0.56448100 | 3.61644400  | -0.23591800 |
| H | 0.30779700  | 3.88025600  | 0.36443000  |
| C | -1.38224800 | 4.57911400  | -0.67959900 |
| H | -2.26009200 | 4.35140800  | -1.28099300 |
| H | -1.18602900 | 5.62287500  | -0.45063000 |

## A9

|   |             |             |             |
|---|-------------|-------------|-------------|
| C | -0.44383500 | 1.79895700  | 1.67843600  |
| C | -0.71217300 | 0.79448800  | 1.00097600  |
| N | -0.73026400 | -0.49317700 | 0.60553500  |
| C | 0.16912400  | -1.48260600 | 1.24619600  |
| C | 1.56688600  | -1.26317200 | 0.92186400  |
| C | 2.73680800  | -1.06254800 | 0.67105800  |
| C | 4.11272900  | -0.83414100 | 0.37909700  |
| C | 4.67503300  | -1.28083200 | -0.82323500 |
| C | 4.93653500  | -0.15846100 | 1.29801100  |
| C | 6.01659100  | -1.06808900 | -1.11125600 |
| H | 4.04726100  | -1.80335400 | -1.54173300 |

|   |             |             |             |
|---|-------------|-------------|-------------|
| C | 6.27169300  | 0.05554400  | 1.02007800  |
| H | 4.51217000  | 0.19521400  | 2.23524800  |
| C | 6.82353000  | -0.39869200 | -0.18612000 |
| H | 6.42224600  | -1.42720900 | -2.05201700 |
| H | 6.91889600  | 0.57414800  | 1.72330500  |
| S | -1.46150000 | -0.89926500 | -0.88392100 |
| O | -0.51950700 | -1.70297700 | -1.63966800 |
| O | -1.93469400 | 0.38847700  | -1.41069100 |
| C | -2.84612100 | -1.87564100 | -0.41721300 |
| C | -2.81131500 | -3.25160500 | -0.61857500 |
| C | -3.94150900 | -1.24075800 | 0.17128800  |
| C | -3.90880100 | -4.00574200 | -0.22166600 |
| H | -1.94611200 | -3.71837900 | -1.08288600 |
| C | -5.02226400 | -2.01404500 | 0.55821500  |
| H | -3.94828700 | -0.16209400 | 0.31884100  |
| C | -5.02333400 | -3.40321200 | 0.36665200  |
| H | -3.90177800 | -5.08331400 | -0.37236400 |
| H | -5.88695900 | -1.53907300 | 1.01823200  |
| C | -6.21202200 | -4.21548100 | 0.76835600  |
| H | -6.61249200 | -3.88513100 | 1.73313700  |
| H | -7.01895500 | -4.10560700 | 0.03242800  |
| H | -5.96794700 | -5.28000800 | 0.83572900  |
| H | -0.00325700 | -1.41365500 | 2.32669300  |
| H | -0.16719000 | -2.48100400 | 0.93664700  |
| O | 8.13493800  | -0.14484000 | -0.36405700 |
| C | 8.74216300  | -0.58518100 | -1.56533800 |
| H | 8.28540100  | -0.11094900 | -2.44415300 |
| H | 9.79172300  | -0.29014100 | -1.50592700 |
| H | 8.68137400  | -1.67641200 | -1.67052400 |
| C | -0.13810700 | 2.93698300  | 2.47661000  |
| H | -0.93566700 | 3.34402700  | 3.09819800  |



|    |             |            |             |
|----|-------------|------------|-------------|
| C  | 1.09298300  | 3.46392400 | 2.51294600  |
| H  | 1.90055000  | 3.06482600 | 1.90263500  |
| H  | 1.32217800  | 4.29808100 | 3.17077200  |
| Cu | -1.77782000 | 2.16489500 | -0.03479600 |
| N  | -2.78025100 | 3.61905500 | -0.79514100 |
| C  | -3.37847200 | 4.47180000 | -1.29942600 |
| C  | -4.12146700 | 5.53308900 | -1.92743600 |
| H  | -5.18855900 | 5.40858100 | -1.72079400 |
| H  | -3.78703000 | 6.49814600 | -1.53558600 |
| H  | -3.95700700 | 5.50570000 | -3.00861000 |

### TS<sub>A9</sub>

Number of imaginary frequencies: 1

Lowest frequency (cm<sup>-1</sup>): -466.6

|   |             |             |             |
|---|-------------|-------------|-------------|
| C | 0.56403900  | -0.80642600 | 0.38147300  |
| C | -0.61361500 | -0.60906500 | 0.89740600  |
| N | -0.92541700 | 0.46408200  | 1.69519500  |
| C | 0.13142700  | 1.51342700  | 1.80573300  |
| C | 1.35546400  | 0.99425900  | 1.20808700  |
| C | 2.55212200  | 0.98106100  | 0.90628900  |
| C | 3.84445200  | 0.76685700  | 0.41511800  |
| C | 4.73337100  | -0.09270500 | 1.09187500  |
| C | 4.25296000  | 1.34817100  | -0.80911400 |
| C | 5.98496800  | -0.36899000 | 0.57602000  |
| H | 4.41575500  | -0.55034500 | 2.02607800  |
| C | 5.50085900  | 1.08539600  | -1.32093100 |
| H | 3.56662900  | 2.00501200  | -1.33862700 |
| C | 6.37756400  | 0.22557800  | -0.63361900 |
| H | 6.65184900  | -1.04084100 | 1.10732800  |
| H | 5.83651000  | 1.52287800  | -2.25750200 |
| S | -2.53830500 | 0.96358800  | 1.85067700  |

|    |             |             |             |
|----|-------------|-------------|-------------|
| O  | -2.49518200 | 2.03683200  | 2.83231600  |
| O  | -3.32152500 | -0.24096000 | 2.08711900  |
| C  | -2.98570300 | 1.63757600  | 0.27849600  |
| C  | -2.90595800 | 3.01572100  | 0.08628200  |
| C  | -3.37290100 | 0.78257000  | -0.75456600 |
| C  | -3.22151300 | 3.53937500  | -1.16015100 |
| H  | -2.61670000 | 3.66566400  | 0.90827100  |
| C  | -3.68004900 | 1.32735700  | -1.99296000 |
| H  | -3.44194800 | -0.29287100 | -0.59122500 |
| C  | -3.61239100 | 2.70778000  | -2.21406800 |
| H  | -3.16869400 | 4.61480600  | -1.32030300 |
| H  | -3.98634500 | 0.67286300  | -2.80720200 |
| C  | -3.98357500 | 3.28508600  | -3.54266600 |
| H  | -3.85487700 | 2.55437200  | -4.34778100 |
| H  | -5.03673700 | 3.59477700  | -3.54776900 |
| H  | -3.38624800 | 4.17268400  | -3.77683900 |
| H  | -0.17753000 | 2.42630100  | 1.27472800  |
| H  | 0.27836800  | 1.76653300  | 2.86068600  |
| O  | 7.56427600  | 0.03071300  | -1.21480700 |
| C  | 8.50532300  | -0.82043600 | -0.57388800 |
| H  | 8.11528700  | -1.84091900 | -0.47788500 |
| H  | 9.38980200  | -0.83055900 | -1.21276400 |
| H  | 8.77706000  | -0.43452200 | 0.41599500  |
| C  | 1.54375100  | -1.69687400 | -0.15355600 |
| H  | 1.75938000  | -2.60689200 | 0.41053900  |
| C  | 2.25183000  | -1.41175700 | -1.25706300 |
| H  | 2.06817200  | -0.50088700 | -1.82478600 |
| H  | 3.03431400  | -2.07673300 | -1.61542200 |
| Cu | -1.77801300 | -2.00161000 | 0.23385500  |
| N  | -2.88800300 | -3.37201100 | -0.47301900 |
| C  | -3.60036900 | -4.19345500 | -0.87044100 |

|   |             |             |             |
|---|-------------|-------------|-------------|
| C | -4.48731900 | -5.21423000 | -1.36409700 |
| H | -4.01747000 | -6.19604000 | -1.25304400 |
| H | -5.42104100 | -5.19595700 | -0.79424900 |
| H | -4.70532900 | -5.03487900 | -2.42106500 |

**B9**

|   |             |             |             |
|---|-------------|-------------|-------------|
| C | 0.33197100  | -1.32765700 | -0.17598300 |
| C | -0.88081200 | -1.05975700 | 0.42055400  |
| N | -0.68916700 | -0.08786200 | 1.39605000  |
| C | 0.66987300  | 0.48250000  | 1.36218700  |
| C | 1.36097800  | -0.44283500 | 0.38191400  |
| C | 2.64440100  | -0.37481700 | 0.15439400  |
| C | 3.97501700  | -0.22200800 | -0.05017300 |
| C | 4.92312400  | -0.93089800 | 0.75703100  |
| C | 4.46718000  | 0.65617100  | -1.07520000 |
| C | 6.26809800  | -0.77054800 | 0.57158900  |
| H | 4.54735300  | -1.60141800 | 1.52568400  |
| C | 5.80616200  | 0.81900900  | -1.25976000 |
| H | 3.74829200  | 1.18622000  | -1.69437400 |
| C | 6.72166200  | 0.11184900  | -0.43833300 |
| H | 6.97593300  | -1.31003600 | 1.19219700  |
| H | 6.20865900  | 1.47928900  | -2.02263100 |
| S | -1.94773500 | 0.87402800  | 1.97462600  |
| O | -1.35335400 | 1.66729400  | 3.04145800  |
| O | -3.06744700 | -0.01836600 | 2.24003700  |
| C | -2.37784300 | 1.94507600  | 0.63416100  |
| C | -1.81750800 | 3.21780200  | 0.57411300  |
| C | -3.23094200 | 1.47937600  | -0.36918900 |
| C | -2.11957500 | 4.03445200  | -0.50948300 |
| H | -1.16929800 | 3.56962600  | 1.37293100  |
| C | -3.51667900 | 2.30933200  | -1.44153700 |

|    |             |             |             |
|----|-------------|-------------|-------------|
| H  | -3.66890400 | 0.48367500  | -0.30087100 |
| C  | -2.96528100 | 3.59458500  | -1.52998800 |
| H  | -1.69526600 | 5.03538400  | -0.56336600 |
| H  | -4.18627200 | 1.96256400  | -2.22731000 |
| C  | -3.28714400 | 4.46958000  | -2.69963200 |
| H  | -2.91993800 | 4.02638100  | -3.63367700 |
| H  | -4.37085100 | 4.59342500  | -2.81271500 |
| H  | -2.83825600 | 5.46222300  | -2.59615000 |
| H  | 0.66165300  | 1.51370900  | 0.98306100  |
| H  | 1.12849800  | 0.47541600  | 2.35427000  |
| O  | 7.99132300  | 0.34096000  | -0.69149200 |
| C  | 9.00317100  | -0.32928200 | 0.06982000  |
| H  | 8.93730200  | -1.41244100 | -0.07535700 |
| H  | 9.95395600  | 0.03809600  | -0.31633400 |
| H  | 8.91338900  | -0.08107100 | 1.13230200  |
| C  | 0.54905100  | -2.33048300 | -1.19358400 |
| H  | -0.35691700 | -2.87295300 | -1.47561000 |
| C  | 1.70213800  | -2.64007900 | -1.79910400 |
| H  | 2.64458700  | -2.14712100 | -1.56353000 |
| H  | 1.74353000  | -3.41171800 | -2.56360700 |
| Cu | -2.58344700 | -1.83011000 | -0.00479600 |
| N  | -4.24727500 | -2.58776100 | -0.51288500 |
| C  | -5.27255300 | -3.04533200 | -0.79586500 |
| C  | -6.54768600 | -3.61441300 | -1.14782900 |
| H  | -6.52816100 | -3.94912700 | -2.18904300 |
| H  | -6.76248300 | -4.46826400 | -0.49851100 |
| H  | -7.33299900 | -2.86260700 | -1.02508700 |

**TS<sub>B9</sub>**

Number of imaginary frequencies: 1

Lowest frequency (cm<sup>-1</sup>): -347.6

|   |             |             |             |
|---|-------------|-------------|-------------|
| C | 0.35205700  | -1.50229400 | -0.22564400 |
| C | -0.81162700 | -1.05670000 | 0.42176400  |
| N | -0.43997900 | 0.00195800  | 1.18860600  |
| C | 0.97811600  | 0.39439700  | 1.04332500  |
| C | 1.44178500  | -0.59785800 | 0.01555800  |
| C | 2.57287600  | -0.61439000 | -0.70343500 |
| C | 3.95034100  | -0.37856800 | -0.60451300 |
| C | 4.64344500  | -0.52500000 | 0.62298500  |
| C | 4.69006000  | 0.01436200  | -1.75058400 |
| C | 5.99435200  | -0.26929300 | 0.71744000  |
| H | 4.08821200  | -0.84140000 | 1.50419800  |
| C | 6.03433600  | 0.27066600  | -1.66786100 |
| H | 4.16670500  | 0.10985500  | -2.69919000 |
| C | 6.69949700  | 0.13151600  | -0.43247000 |
| H | 6.50199700  | -0.38056800 | 1.67030400  |
| H | 6.61558600  | 0.57667600  | -2.53368400 |
| S | -1.56390800 | 1.04761500  | 1.94885600  |
| O | -0.73524700 | 1.95412000  | 2.72741200  |
| O | -2.55279900 | 0.18889900  | 2.58026400  |
| C | -2.31973400 | 1.92033700  | 0.61726400  |
| C | -1.71385200 | 3.07792100  | 0.13537300  |
| C | -3.47926700 | 1.40493200  | 0.03716800  |
| C | -2.28676600 | 3.72675200  | -0.95032700 |
| H | -0.81823900 | 3.47166700  | 0.61004200  |
| C | -4.03289000 | 2.06868300  | -1.04718700 |
| H | -3.93735300 | 0.50342600  | 0.44211300  |
| C | -3.44754300 | 3.23482000  | -1.55566800 |
| H | -1.82898700 | 4.63540300  | -1.33676700 |
| H | -4.94010500 | 1.68192600  | -1.50871100 |
| C | -4.07487100 | 3.95166500  | -2.70815700 |
| H | -3.36376000 | 4.62189000  | -3.20115000 |

|    |             |             |             |
|----|-------------|-------------|-------------|
| H  | -4.46519100 | 3.24747200  | -3.45110400 |
| H  | -4.92219400 | 4.56139300  | -2.36865800 |
| H  | 1.06453800  | 1.44414700  | 0.74095700  |
| H  | 1.51170800  | 0.26100900  | 1.99212800  |
| O  | 8.00344800  | 0.39820200  | -0.45152000 |
| C  | 8.75132200  | 0.28370300  | 0.75510100  |
| H  | 8.72226500  | -0.74169900 | 1.14169500  |
| H  | 9.77892000  | 0.54453100  | 0.49798000  |
| H  | 8.37882200  | 0.97935000  | 1.51610800  |
| C  | 0.56803800  | -2.51845300 | -1.18312600 |
| H  | -0.28490200 | -2.96476100 | -1.69603300 |
| C  | 1.85438600  | -2.78844300 | -1.55080300 |
| H  | 2.65637700  | -2.70874100 | -0.81710000 |
| H  | 2.10105000  | -3.34736900 | -2.45076900 |
| Cu | -2.59118200 | -1.70649400 | 0.13937100  |
| N  | -4.32221500 | -2.39456900 | -0.23545700 |
| C  | -5.37598100 | -2.83394600 | -0.42755900 |
| C  | -6.68552300 | -3.38383700 | -0.66331000 |
| H  | -6.61971500 | -4.18858700 | -1.40168700 |
| H  | -7.08927200 | -3.78384900 | 0.27156600  |
| H  | -7.35286200 | -2.60261500 | -1.03898100 |

## **C2**

|   |             |             |             |
|---|-------------|-------------|-------------|
| C | 0.49141400  | -1.43689800 | -0.20619500 |
| C | -0.70516000 | -0.80558900 | 0.28919900  |
| N | -0.28477500 | 0.35334900  | 0.78654300  |
| C | 1.18935800  | 0.64545600  | 0.70031500  |
| C | 1.65331600  | -0.59688200 | 0.02805400  |
| C | 2.77106400  | -1.21572300 | -0.42570400 |
| C | 4.15803300  | -0.77742300 | -0.39712300 |
| C | 4.52055000  | 0.46705900  | 0.13512900  |

|   |             |             |             |
|---|-------------|-------------|-------------|
| C | 5.18924600  | -1.59430300 | -0.89460700 |
| C | 5.84324200  | 0.88874800  | 0.18128700  |
| H | 3.75471000  | 1.13434900  | 0.52733100  |
| C | 6.50972300  | -1.18788800 | -0.85714800 |
| H | 4.95316400  | -2.56900100 | -1.31769000 |
| C | 6.85088300  | 0.05740400  | -0.31574400 |
| H | 6.07848900  | 1.86017300  | 0.60600700  |
| H | 7.30513500  | -1.82279200 | -1.24077500 |
| S | -1.35713600 | 1.48974300  | 1.57783500  |
| O | -0.50435300 | 2.64030700  | 1.82028900  |
| O | -1.99280000 | 0.77797800  | 2.67292400  |
| C | -2.53569200 | 1.83606500  | 0.31937600  |
| C | -2.13698700 | 2.61628000  | -0.76518000 |
| C | -3.82285200 | 1.31273900  | 0.41829400  |
| C | -3.05528200 | 2.86948000  | -1.77146600 |
| H | -1.12794600 | 3.02130300  | -0.81626100 |
| C | -4.72529800 | 1.57953000  | -0.60309400 |
| H | -4.10852100 | 0.71208300  | 1.27877600  |
| C | -4.35692700 | 2.35367100  | -1.70814200 |
| H | -2.76568400 | 3.48174200  | -2.62341800 |
| H | -5.73751600 | 1.18375800  | -0.53966000 |
| C | -5.32716900 | 2.61203200  | -2.81536100 |
| H | -5.19160000 | 1.88219400  | -3.62410700 |
| H | -6.36219700 | 2.52917900  | -2.46921000 |
| H | -5.18166800 | 3.60600300  | -3.25146200 |
| H | 1.33978600  | 1.57110900  | 0.12946700  |
| H | 1.58839200  | 0.79884400  | 1.71090700  |
| O | 8.16534300  | 0.36490000  | -0.31749700 |
| C | 8.55461600  | 1.60799200  | 0.23435900  |
| H | 8.27591900  | 1.68256200  | 1.29412000  |
| H | 9.64198100  | 1.65798200  | 0.14696900  |

|    |             |             |             |
|----|-------------|-------------|-------------|
| H  | 8.11218500  | 2.45005600  | -0.31473200 |
| C  | 0.84713500  | -2.59471200 | -0.81280000 |
| H  | 0.20948100  | -3.42006100 | -1.11118400 |
| C  | 2.32547600  | -2.54495600 | -0.99915600 |
| H  | 2.81118900  | -3.39627600 | -0.49608900 |
| H  | 2.59544100  | -2.65230200 | -2.06167900 |
| Cu | -2.47468300 | -1.51887900 | 0.24655100  |
| N  | -4.20235300 | -2.30838900 | 0.21382500  |
| C  | -5.27195800 | -2.75143500 | 0.20485700  |
| C  | -6.60285800 | -3.30030900 | 0.19360000  |
| H  | -6.98602000 | -3.31587400 | -0.83091400 |
| H  | -6.58415500 | -4.32065000 | 0.58747200  |
| H  | -7.25943400 | -2.68500500 | 0.81597100  |

### TSc<sub>2</sub>

Number of imaginary frequencies: 1

Lowest frequency (cm<sup>-1</sup>): -455.5

|   |             |             |             |
|---|-------------|-------------|-------------|
| C | 0.16531500  | -1.86422200 | 0.13128500  |
| C | -1.05382700 | -1.33793600 | 0.61800800  |
| N | -0.68860300 | -0.26737000 | 1.36241300  |
| C | 0.75992800  | 0.10062800  | 1.29516400  |
| C | 1.28306500  | -1.06264500 | 0.53046600  |
| C | 2.45300900  | -1.62660400 | 0.10560100  |
| C | 3.81172600  | -1.13350100 | 0.23384400  |
| C | 4.07443400  | 0.19894800  | 0.58540600  |
| C | 4.91604000  | -1.96982500 | -0.01586800 |
| C | 5.37175300  | 0.68431800  | 0.69797500  |
| H | 3.24949500  | 0.88719400  | 0.76269400  |
| C | 6.21072600  | -1.50117100 | 0.09684000  |
| H | 4.75451500  | -3.01104600 | -0.28921800 |
| C | 6.45173100  | -0.16887000 | 0.45669500  |



|   |             |             |             |
|---|-------------|-------------|-------------|
| H | 5.53038500  | 1.72398800  | 0.96856100  |
| H | 7.06345400  | -2.15040200 | -0.08808700 |
| S | -1.79543700 | 0.66214800  | 2.28399900  |
| O | -0.96570400 | 1.36037400  | 3.25180400  |
| O | -2.84145500 | -0.25624400 | 2.70601600  |
| C | -2.47340700 | 1.82616600  | 1.14632800  |
| C | -2.00509700 | 3.13627000  | 1.16706100  |
| C | -3.48605200 | 1.42206000  | 0.27370700  |
| C | -2.57329700 | 4.06174900  | 0.30067500  |
| H | -1.22077600 | 3.42781700  | 1.86088800  |
| C | -4.03134100 | 2.36027000  | -0.58865000 |
| H | -3.84716700 | 0.39345800  | 0.27971000  |
| C | -3.58770800 | 3.69039900  | -0.58632500 |
| H | -2.22667200 | 5.09339800  | 0.31344500  |
| H | -4.82670900 | 2.06643000  | -1.27143100 |
| C | -4.16981700 | 4.68018400  | -1.54361100 |
| H | -5.25005900 | 4.53932400  | -1.65804800 |
| H | -3.98316700 | 5.70951900  | -1.22209100 |
| H | -3.72260400 | 4.55854100  | -2.53913500 |
| H | 0.85382200  | 1.06241400  | 0.76307400  |
| H | 1.17473600  | 0.21526600  | 2.30235600  |
| O | 7.74890100  | 0.19523400  | 0.54215500  |
| C | 8.04017500  | 1.52763800  | 0.91778900  |
| H | 7.64866700  | 1.75938500  | 1.91736700  |
| H | 9.12867300  | 1.61308600  | 0.93366700  |
| H | 7.63547500  | 2.24948600  | 0.19556200  |
| C | 0.60372100  | -2.91347000 | -0.67993100 |
| H | 0.00811600  | -3.78435200 | -0.94310300 |
| C | 2.09336700  | -2.98153100 | -0.46676000 |
| H | 2.26723700  | -3.75232000 | 0.30598100  |
| H | 2.67397700  | -3.28673400 | -1.34281700 |

|    |             |             |             |
|----|-------------|-------------|-------------|
| Cu | -2.82534600 | -1.96753000 | 0.28316000  |
| N  | -4.52321500 | -2.67071700 | -0.18171700 |
| C  | -5.55421100 | -3.11724600 | -0.46132400 |
| C  | -6.83454000 | -3.67463200 | -0.81093100 |
| H  | -6.85562600 | -4.73762300 | -0.55328500 |
| H  | -7.62582800 | -3.15482800 | -0.26274300 |
| H  | -7.00492500 | -3.56020700 | -1.88563800 |
| C  | 0.59803800  | -2.09936100 | -2.65372700 |
| H  | 0.94607500  | -3.03732200 | -3.08151600 |
| C  | 1.46072600  | -1.03335800 | -2.60399300 |
| H  | 2.52460800  | -1.21379300 | -2.76960900 |
| H  | -0.47913700 | -1.94385700 | -2.69473800 |
| C  | 1.09809600  | 0.33796500  | -2.32845300 |
| C  | 2.11442500  | 1.31156600  | -2.26694100 |
| C  | -0.23098700 | 0.74722700  | -2.10781700 |
| C  | 1.81776400  | 2.63988400  | -2.00112300 |
| H  | 3.14623100  | 1.00498800  | -2.43658100 |
| C  | -0.52288600 | 2.08017100  | -1.84678400 |
| H  | -1.04225800 | 0.02133600  | -2.16177100 |
| C  | 0.49477100  | 3.03087000  | -1.79225000 |
| H  | 2.61783800  | 3.37574900  | -1.96044300 |
| H  | -1.55675700 | 2.38191800  | -1.68697700 |
| H  | 0.25538900  | 4.07322900  | -1.59052600 |

## D2

|   |             |             |             |
|---|-------------|-------------|-------------|
| C | 0.07030500  | -1.67967400 | -0.28628300 |
| C | -1.13089900 | -1.24170400 | 0.35203400  |
| N | -0.72323100 | -0.34568900 | 1.27080500  |
| C | 0.73315000  | -0.09119400 | 1.26815200  |
| C | 1.15384200  | -1.01782900 | 0.20608800  |
| C | 2.33844600  | -1.34986200 | -0.64292200 |

|   |             |             |             |
|---|-------------|-------------|-------------|
| C | 3.71849800  | -1.08083800 | -0.12926900 |
| C | 3.99352300  | 0.01166600  | 0.69299800  |
| C | 4.79733800  | -1.87788100 | -0.53383900 |
| C | 5.28828900  | 0.30937600  | 1.11289600  |
| H | 3.18791200  | 0.67130600  | 1.01253900  |
| C | 6.09073200  | -1.59858600 | -0.12650200 |
| H | 4.62429700  | -2.73539900 | -1.18201000 |
| C | 6.34749900  | -0.50016400 | 0.70186600  |
| H | 5.45753300  | 1.16983200  | 1.75388200  |
| H | 6.92664300  | -2.22122500 | -0.43758300 |
| S | -1.78430400 | 0.46422700  | 2.37405200  |
| O | -0.90040600 | 1.36221700  | 3.09800800  |
| O | -2.55540200 | -0.55438100 | 3.06627500  |
| C | -2.83774700 | 1.36417600  | 1.28796800  |
| C | -2.31702900 | 2.46014800  | 0.59840900  |
| C | -4.15513700 | 0.94979100  | 1.11925100  |
| C | -3.14432900 | 3.14484800  | -0.27648300 |
| H | -1.28433200 | 2.77402300  | 0.74772500  |
| C | -4.96556400 | 1.64924500  | 0.23257800  |
| H | -4.53808000 | 0.10194800  | 1.68158500  |
| C | -4.47566500 | 2.74937600  | -0.47488300 |
| H | -2.76270200 | 4.01002600  | -0.81653600 |
| H | -5.99949500 | 1.33883400  | 0.09130200  |
| C | -5.34366300 | 3.50454000  | -1.42898500 |
| H | -4.95029000 | 3.43791500  | -2.45080400 |
| H | -6.36859000 | 3.12186700  | -1.43247800 |
| H | -5.37455300 | 4.56970900  | -1.17082200 |
| H | 0.92910300  | 0.96428100  | 1.02602900  |
| H | 1.17251200  | -0.30084600 | 2.25247100  |
| O | 7.64042500  | -0.30635500 | 1.04716000  |
| C | 7.94238500  | 0.80239600  | 1.87040200  |

|    |             |             |             |
|----|-------------|-------------|-------------|
| H  | 7.44007600  | 0.73184900  | 2.84480000  |
| H  | 9.02322400  | 0.78726400  | 2.02638100  |
| H  | 7.66406100  | 1.75039000  | 1.39014400  |
| C  | 0.51348700  | -2.46151400 | -1.48627300 |
| H  | -0.11948800 | -3.29370900 | -1.80250900 |
| C  | 1.94924000  | -2.79511500 | -1.04957400 |
| H  | 2.00052200  | -3.49074000 | -0.20360900 |
| H  | 2.56443200  | -3.17299400 | -1.87520300 |
| Cu | -2.93601100 | -1.74907100 | -0.01775900 |
| N  | -4.73507000 | -2.20598600 | -0.41558800 |
| C  | -5.83849200 | -2.47216300 | -0.64351600 |
| C  | -7.21056000 | -2.80439700 | -0.92705700 |
| H  | -7.42524600 | -2.61473400 | -1.98299400 |
| H  | -7.38562400 | -3.86196300 | -0.70783700 |
| H  | -7.87340200 | -2.19301300 | -0.30747400 |
| C  | 0.79369000  | -1.40104200 | -2.58440000 |
| H  | 1.03555000  | -1.89449700 | -3.53210700 |
| C  | 2.02534300  | -0.63193700 | -2.05315200 |
| H  | 2.90409200  | -0.88828800 | -2.66099600 |
| H  | -0.07397400 | -0.75606700 | -2.76252200 |
| C  | 1.94691300  | 0.86460500  | -1.95995500 |
| C  | 3.12065700  | 1.61254200  | -2.10978700 |
| C  | 0.76440900  | 1.54858800  | -1.65378900 |
| C  | 3.12153700  | 2.99372900  | -1.94629200 |
| H  | 4.04820900  | 1.09447500  | -2.35426300 |
| C  | 0.76240800  | 2.93144500  | -1.48844600 |
| H  | -0.17170500 | 1.00015900  | -1.53808300 |
| C  | 1.94067500  | 3.65945200  | -1.63017700 |
| H  | 4.04780400  | 3.55098800  | -2.06857400 |
| H  | -0.16999700 | 3.44221600  | -1.25194700 |
| H  | 1.93616600  | 4.73955600  | -1.50273100 |

**TS<sub>E2</sub>**

Number of imaginary frequencies: 1

Lowest frequency (cm<sup>-1</sup>): -251.0

|   |             |             |             |
|---|-------------|-------------|-------------|
| C | -0.37029800 | -1.90272900 | -0.34501100 |
| C | -1.53237700 | -1.40656500 | 0.21575100  |
| N | -1.05439700 | -0.38573500 | 1.05428200  |
| C | 0.36741600  | -0.23138100 | 1.00283400  |
| C | 0.76766300  | -1.18098900 | 0.08662800  |
| C | 1.94702500  | -1.67337300 | -0.69753900 |
| C | 3.32014800  | -1.38561400 | -0.17100200 |
| C | 3.65108400  | -0.12088300 | 0.32000500  |
| C | 4.32818300  | -2.35719600 | -0.19354500 |
| C | 4.92985800  | 0.17608400  | 0.78682500  |
| H | 2.90003200  | 0.66858700  | 0.32743400  |
| C | 5.60533300  | -2.08085900 | 0.26735900  |
| H | 4.11171600  | -3.35414900 | -0.57369700 |
| C | 5.91634700  | -0.81117100 | 0.76449800  |
| H | 5.14252900  | 1.17349300  | 1.16094300  |
| H | 6.38506500  | -2.83935100 | 0.25543800  |
| S | -2.00414100 | 0.60329800  | 2.02812500  |
| O | -1.21673600 | 0.80452900  | 3.26325000  |
| O | -3.32768400 | 0.01527700  | 2.12454400  |
| C | -2.07604700 | 2.13911500  | 1.17361800  |
| C | -1.28524900 | 3.20954300  | 1.58389000  |
| C | -2.91482400 | 2.22346300  | 0.06267800  |
| C | -1.35369500 | 4.39479500  | 0.86558400  |
| H | -0.63737900 | 3.11834100  | 2.45162200  |
| C | -2.96282300 | 3.41779000  | -0.64090300 |
| H | -3.52089000 | 1.37170400  | -0.24136200 |
| C | -2.18996500 | 4.51786000  | -0.24981500 |
| H | -0.74622800 | 5.24434100  | 1.17257800  |

|    |             |             |             |
|----|-------------|-------------|-------------|
| H  | -3.61115300 | 3.50305900  | -1.51070200 |
| C  | -2.25308400 | 5.80530300  | -1.00731300 |
| H  | -1.25379000 | 6.23394600  | -1.14469300 |
| H  | -2.71313400 | 5.67093200  | -1.99126500 |
| H  | -2.84702100 | 6.54886500  | -0.46051800 |
| H  | 0.81481400  | 0.71850900  | 1.29010000  |
| H  | 0.79116400  | -0.90280500 | 2.53985200  |
| O  | 7.18680700  | -0.63892900 | 1.19853700  |
| C  | 7.54394800  | 0.63124600  | 1.70367000  |
| H  | 6.95111200  | 0.89728100  | 2.59002100  |
| H  | 8.59667600  | 0.56763200  | 1.98785600  |
| H  | 7.42662100  | 1.41713800  | 0.94501400  |
| C  | 0.10317900  | -2.84699700 | -1.41314400 |
| H  | -0.53576200 | -3.70586200 | -1.63669200 |
| C  | 1.51811400  | -3.15112400 | -0.89020100 |
| H  | 1.52671000  | -3.71287700 | 0.05238700  |
| H  | 2.14045000  | -3.67094800 | -1.63027000 |
| Cu | -3.36413800 | -1.85990300 | -0.05778100 |
| N  | -5.16370500 | -2.31190500 | -0.43550500 |
| C  | -6.26777700 | -2.57382200 | -0.66614700 |
| C  | -7.64133300 | -2.89847100 | -0.95397000 |
| H  | -7.75511500 | -3.10809000 | -2.02177100 |
| H  | -7.93995000 | -3.78044700 | -0.37954100 |
| H  | -8.28361100 | -2.05586900 | -0.68133200 |
| C  | 0.44800800  | -1.96831200 | -2.64052500 |
| H  | 0.69595700  | -2.59451900 | -3.50580900 |
| C  | 1.69783200  | -1.16337300 | -2.19101700 |
| H  | 2.57604300  | -1.52355100 | -2.74554300 |
| H  | -0.39025400 | -1.32441000 | -2.92942700 |
| C  | 1.64951800  | 0.33198300  | -2.32854700 |
| C  | 2.79635200  | 1.02110000  | -2.73691800 |

|   |             |             |             |
|---|-------------|-------------|-------------|
| C | 0.51556100  | 1.08290800  | -1.99111700 |
| C | 2.82154000  | 2.41144900  | -2.79655700 |
| H | 3.68691100  | 0.45102000  | -3.00251700 |
| C | 0.53925500  | 2.47291100  | -2.04209500 |
| H | -0.39845300 | 0.57861600  | -1.67421600 |
| C | 1.69234100  | 3.14394200  | -2.44282100 |
| H | 3.72652400  | 2.92257000  | -3.11867600 |
| H | -0.35334500 | 3.03465800  | -1.76813800 |
| H | 1.70714100  | 4.23104800  | -2.48484300 |
| O | 0.69186100  | -0.91103500 | 3.58373700  |
| H | -0.11092900 | -0.31538500 | 3.72738300  |
| H | 0.52910500  | -1.81411900 | 3.92315100  |

## **F2**

|   |             |             |             |
|---|-------------|-------------|-------------|
| C | 0.92165200  | -1.71293500 | -0.34969500 |
| C | 1.98140000  | -0.83161500 | -0.31802100 |
| N | 1.30773200  | 0.43942800  | -0.33311300 |
| C | -0.08829700 | 0.30066100  | -0.44346100 |
| C | -0.33525700 | -1.03509300 | -0.41490400 |
| C | -1.41305000 | -2.07901900 | -0.32680000 |
| C | -2.79893100 | -1.70750000 | -0.75676200 |
| C | -3.35695200 | -0.48193300 | -0.38842500 |
| C | -3.60547800 | -2.59758600 | -1.47641000 |
| C | -4.66435300 | -0.13775500 | -0.72454000 |
| H | -2.76633400 | 0.22432000  | 0.19444000  |
| C | -4.90781100 | -2.27217600 | -1.82150300 |
| H | -3.20870500 | -3.56606500 | -1.77746600 |
| C | -5.44885500 | -1.03804400 | -1.44713400 |
| H | -5.05677900 | 0.82647700  | -0.41501100 |
| H | -5.53103100 | -2.96261700 | -2.38576000 |
| S | 2.12891000  | 1.82377600  | -0.83983800 |

|    |             |             |             |
|----|-------------|-------------|-------------|
| O  | 2.22627000  | 1.77539100  | -2.32249500 |
| O  | 3.37486000  | 1.89948200  | -0.09444900 |
| C  | 1.04368900  | 3.12766500  | -0.40189300 |
| C  | 0.31883700  | 3.79118100  | -1.38684700 |
| C  | 0.91450200  | 3.43929100  | 0.95305200  |
| C  | -0.54906100 | 4.80263100  | -0.99738900 |
| H  | 0.43121000  | 3.51994900  | -2.43303200 |
| C  | 0.03712500  | 4.44689100  | 1.31557600  |
| H  | 1.48632100  | 2.89935000  | 1.70506400  |
| C  | -0.70155600 | 5.14427500  | 0.34938800  |
| H  | -1.12201200 | 5.33718300  | -1.75231200 |
| H  | -0.08237900 | 4.70439200  | 2.36637900  |
| C  | -1.62204500 | 6.24682200  | 0.76201900  |
| H  | -2.21100500 | 5.96461400  | 1.64186400  |
| H  | -1.04992500 | 7.14266300  | 1.03552200  |
| H  | -2.30797000 | 6.52344700  | -0.04432300 |
| H  | 1.49995900  | -0.97505800 | -3.57878000 |
| O  | -6.72823600 | -0.81000900 | -1.82740800 |
| C  | -7.31642700 | 0.42115100  | -1.46069600 |
| H  | -6.78425600 | 1.27370600  | -1.90494000 |
| H  | -8.33879700 | 0.40289100  | -1.84498900 |
| H  | -7.34833600 | 0.54706500  | -0.36980800 |
| C  | 0.60955300  | -3.17398100 | -0.23233500 |
| H  | 1.40669900  | -3.87309300 | -0.50021500 |
| C  | -0.68821800 | -3.23627500 | -1.06104400 |
| H  | -0.53889300 | -3.02400200 | -2.12795600 |
| H  | -1.20917200 | -4.19606100 | -0.95010400 |
| Cu | 3.86536900  | -1.05488000 | -0.09135300 |
| N  | 5.71709000  | -1.36889700 | 0.15340000  |
| C  | 6.84935800  | -1.54180800 | 0.32328900  |
| C  | 8.25773100  | -1.75565700 | 0.53582800  |



|   |             |             |             |
|---|-------------|-------------|-------------|
| H | 8.44432000  | -2.81491500 | 0.73633300  |
| H | 8.81629600  | -1.45348500 | -0.35508900 |
| H | 8.59444800  | -1.16244100 | 1.39130700  |
| C | 0.03750000  | -3.37369900 | 1.19293600  |
| H | -0.08797800 | -4.44220400 | 1.40329100  |
| C | -1.34593700 | -2.67048800 | 1.15150700  |
| H | -2.13506000 | -3.43599800 | 1.17287600  |
| H | 0.70414700  | -2.96410700 | 1.95994000  |
| C | -1.65206700 | -1.67294700 | 2.23227800  |
| C | -2.95169800 | -1.60084200 | 2.74571800  |
| C | -0.70577900 | -0.75584200 | 2.70604400  |
| C | -3.30162700 | -0.64552300 | 3.69481600  |
| H | -3.70089000 | -2.30605200 | 2.38522900  |
| C | -1.05253600 | 0.20421400  | 3.65240600  |
| H | 0.31784400  | -0.78760100 | 2.33411800  |
| C | -2.35177700 | 0.26429200  | 4.15038500  |
| H | -4.31893200 | -0.61298600 | 4.07955600  |
| H | -0.30077200 | 0.90822600  | 4.00479200  |
| H | -2.62014300 | 1.01250100  | 4.89313300  |
| O | 2.28121100  | -0.67454400 | -3.07158100 |
| H | 2.26307500  | 0.34123500  | -2.95303300 |
| H | 2.24083900  | -1.03793300 | -2.10429200 |
| H | -0.73242200 | 1.17130600  | -0.47893600 |

## TS<sub>F2</sub>

Number of imaginary frequencies: 1

Lowest frequency (cm<sup>-1</sup>): -77.9

|   |             |             |             |
|---|-------------|-------------|-------------|
| C | 0.92006500  | -1.70616400 | -0.39363800 |
| C | 1.98026700  | -0.82320400 | -0.37960400 |
| N | 1.30364400  | 0.44771500  | -0.37237700 |
| C | -0.09082500 | 0.30630500  | -0.45788600 |

|   |             |             |             |
|---|-------------|-------------|-------------|
| C | -0.33690300 | -1.03087200 | -0.43460700 |
| C | -1.41244700 | -2.07747000 | -0.34354900 |
| C | -2.80310600 | -1.70506300 | -0.75688800 |
| C | -3.36025500 | -0.48318900 | -0.37508300 |
| C | -3.61324300 | -2.59057600 | -1.47815300 |
| C | -4.66982800 | -0.13775700 | -0.70128700 |
| H | -2.76706700 | 0.21886500  | 0.21033500  |
| C | -4.91782000 | -2.26395400 | -1.81321900 |
| H | -3.21726400 | -3.55620300 | -1.78920700 |
| C | -5.45742800 | -1.03288400 | -1.42694600 |
| H | -5.06152600 | 0.82368200  | -0.38228400 |
| H | -5.54353900 | -2.95060000 | -2.37932800 |
| S | 2.12059600  | 1.84423700  | -0.85917500 |
| O | 2.22035900  | 1.82008100  | -2.33970500 |
| O | 3.36393400  | 1.90823400  | -0.10750700 |
| C | 1.02912000  | 3.13521100  | -0.39905600 |
| C | 0.29772900  | 3.80628400  | -1.37401900 |
| C | 0.90042900  | 3.42833200  | 0.95996300  |
| C | -0.57668600 | 4.80627000  | -0.96990000 |
| H | 0.41035300  | 3.54904300  | -2.42375700 |
| C | 0.01647300  | 4.42483200  | 1.33731900  |
| H | 1.47819700  | 2.88281800  | 1.70332700  |
| C | -0.72911200 | 5.12916300  | 0.38161200  |
| H | -1.15517100 | 5.34648600  | -1.71655200 |
| H | -0.10289900 | 4.66782600  | 2.39160800  |
| C | -1.65672300 | 6.21979300  | 0.80978000  |
| H | -2.23300800 | 5.92764700  | 1.69468700  |
| H | -1.09110200 | 7.12055600  | 1.08071500  |
| H | -2.35425900 | 6.49282700  | 0.01220400  |
| H | 1.58439700  | -0.98978900 | -3.57693000 |
| O | -6.73864700 | -0.80233500 | -1.79940500 |

|    |             |             |             |
|----|-------------|-------------|-------------|
| C  | -7.32439500 | 0.42711900  | -1.42319500 |
| H  | -6.79233600 | 1.28184700  | -1.86338300 |
| H  | -8.34780900 | 0.41254600  | -1.80486600 |
| H  | -7.35329700 | 0.54611200  | -0.33145200 |
| C  | 0.61354600  | -3.16832100 | -0.28588900 |
| H  | 1.40915400  | -3.86294100 | -0.56932700 |
| C  | -0.69465900 | -3.22648500 | -1.09761500 |
| H  | -0.56033600 | -3.00476000 | -2.16445100 |
| H  | -1.21179800 | -4.18843700 | -0.98781700 |
| Cu | 3.85884700  | -1.04758400 | -0.09601500 |
| N  | 5.70639500  | -1.36145700 | 0.17868900  |
| C  | 6.83625900  | -1.53218900 | 0.36585000  |
| C  | 8.24169700  | -1.74308700 | 0.59973600  |
| H  | 8.42728800  | -2.80173300 | 0.80437700  |
| H  | 8.81282400  | -1.44099900 | -0.28319800 |
| H  | 8.56439300  | -1.14818100 | 1.45944700  |
| C  | 0.06053300  | -3.38060100 | 1.14591600  |
| H  | -0.05746900 | -4.45123600 | 1.34938200  |
| C  | -1.32638200 | -2.68300300 | 1.12741300  |
| H  | -2.11163700 | -3.45241600 | 1.15029200  |
| H  | 0.73571800  | -2.97427700 | 1.90721400  |
| C  | -1.62564200 | -1.69722200 | 2.22090100  |
| C  | -2.92086800 | -1.63588900 | 2.74689600  |
| C  | -0.67910900 | -0.78037000 | 2.69481100  |
| C  | -3.26636000 | -0.69165300 | 3.70854100  |
| H  | -3.67016300 | -2.34091700 | 2.38634000  |
| C  | -1.02147100 | 0.16828000  | 3.65426000  |
| H  | 0.34127900  | -0.80311000 | 2.31329000  |
| C  | -2.31629200 | 0.21763200  | 4.16467700  |
| H  | -4.28029000 | -0.66746400 | 4.10268800  |
| H  | -0.26965900 | 0.87179900  | 4.00739400  |

|   |             |             |             |
|---|-------------|-------------|-------------|
| H | -2.58090100 | 0.95691600  | 4.91762900  |
| O | 2.35764600  | -0.65455600 | -3.07991800 |
| H | 2.31087000  | 0.35614400  | -3.00352100 |
| H | 2.31266000  | -0.97630200 | -2.07759200 |
| H | -0.73770200 | 1.17558000  | -0.48081900 |

**6a**

|   |             |             |             |
|---|-------------|-------------|-------------|
| S | 2.75001900  | -1.77354800 | -1.63736400 |
| O | -6.11926400 | 0.89540100  | -1.97847200 |
| O | 3.65266700  | -2.86741300 | -1.31648100 |
| O | 2.23869000  | -1.58173200 | -2.98492900 |
| N | 1.39409100  | -2.00548200 | -0.65316300 |
| C | 0.21002700  | -1.27073100 | -0.79296300 |
| H | 0.02871300  | -0.70124500 | -1.69612400 |
| C | -0.51488300 | -1.50753200 | 0.33334000  |
| C | -2.70182900 | 0.36612200  | -0.71892700 |
| H | -1.69131000 | 0.74609700  | -0.86701900 |
| C | -0.79009100 | 1.04639800  | 1.94209000  |
| C | -5.04040700 | 0.44802000  | -1.29168600 |
| C | 0.23709000  | -2.37263400 | 1.18972000  |
| C | -2.92820600 | -0.63650200 | 0.22613600  |
| C | -3.73644500 | 0.91050700  | -1.47700600 |
| H | -3.51634200 | 1.68643800  | -2.20510800 |
| C | 3.19612500  | 0.91897300  | -1.78116400 |
| H | 2.58036200  | 0.89401200  | -2.67680000 |
| C | 1.07774200  | 2.40837600  | 1.19809300  |
| H | 2.12701000  | 2.47799300  | 0.91416800  |
| C | 3.44925400  | -0.25232100 | -1.07044100 |
| C | 3.76277800  | 2.10406100  | -1.33541200 |
| H | 3.58337000  | 3.02670000  | -1.88531300 |
| C | 4.23551400  | -0.25439100 | 0.07902200  |

|   |             |             |             |
|---|-------------|-------------|-------------|
| H | 4.43008200  | -1.18033500 | 0.61617300  |
| C | -4.24542300 | -1.07590000 | 0.40386200  |
| H | -4.46219200 | -1.85495900 | 1.13300400  |
| C | 0.55554700  | 1.17458900  | 1.57435600  |
| H | 1.21033900  | 0.30240100  | 1.57592000  |
| C | 4.55918200  | 2.13611100  | -0.18454900 |
| C | -1.41070800 | -0.27490600 | 2.29295300  |
| H | -2.36976200 | -0.06928100 | 2.79035300  |
| C | -1.58700700 | 2.19622000  | 1.92672900  |
| H | -2.63667600 | 2.11352300  | 2.21011400  |
| C | -1.06840500 | 3.43183300  | 1.55074900  |
| H | -1.71098200 | 4.31005200  | 1.54830500  |
| C | 4.78151500  | 0.94564800  | 0.51537500  |
| H | 5.40186300  | 0.96059100  | 1.40962700  |
| C | 0.26916800  | 3.54195700  | 1.18207500  |
| H | 0.68106600  | 4.50533300  | 0.88828700  |
| C | -5.28761900 | -0.54727400 | -0.34165800 |
| H | -6.30908700 | -0.89802200 | -0.21053400 |
| C | -0.59322900 | -2.57921400 | 2.42128600  |
| H | -0.36258000 | -3.45172000 | 3.03690900  |
| C | 1.42800100  | -2.64820700 | 0.59313500  |
| H | 2.27727900  | -3.26260400 | 0.86136100  |
| C | -5.90579200 | 1.88209200  | -2.96576300 |
| H | -6.88069500 | 2.08999300  | -3.41285100 |
| H | -5.22201400 | 1.52937500  | -3.75027400 |
| H | -5.50627000 | 2.81048500  | -2.53443800 |
| C | -2.00363300 | -2.52167700 | 1.79948700  |
| H | -2.79302800 | -2.46078000 | 2.56084700  |
| H | -2.21649000 | -3.35461100 | 1.11828300  |
| C | -1.79887400 | -1.18336200 | 1.04524200  |
| C | -0.57663600 | -1.23365900 | 3.18643100  |

|   |             |             |             |
|---|-------------|-------------|-------------|
| H | 0.44290300  | -0.87203400 | 3.35970400  |
| H | -1.05450300 | -1.34960900 | 4.16649700  |
| C | 5.13015300  | 3.43175900  | 0.29767500  |
| H | 5.61424500  | 3.98099200  | -0.51806300 |
| H | 5.86403800  | 3.27849200  | 1.09481600  |
| H | 4.33753000  | 4.08167700  | 0.69201400  |

2a: ASH, *n*-hexane/2-propanol = 85/15,  $v = 1.0 \text{ mL min}^{-1}$ ,  $\lambda = 254 \text{ nm}$

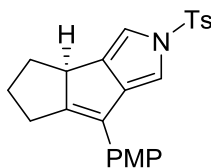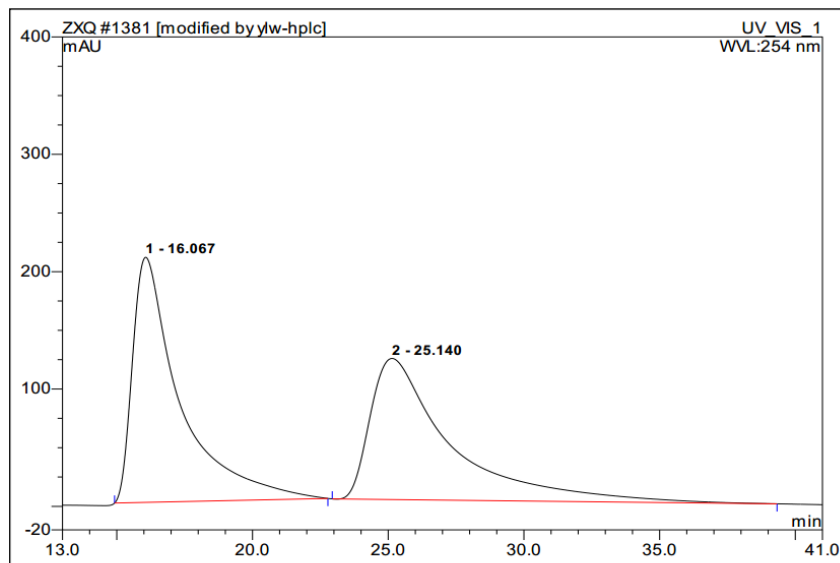

| No.           | Ret.Time<br>min | Peak Name | Height<br>mAU | Area<br>mAU*min | Rel.Area<br>% | Amount<br>n.a. | Type |
|---------------|-----------------|-----------|---------------|-----------------|---------------|----------------|------|
| 1             | 16.07           | n.a.      | 208.818       | 422.123         | 50.90         | n.a.           | BMB* |
| 2             | 25.14           | n.a.      | 120.205       | 407.222         | 49.10         | n.a.           | BMB* |
| <b>Total:</b> |                 |           | 329.023       | 829.345         | 100.00        | 0.000          |      |

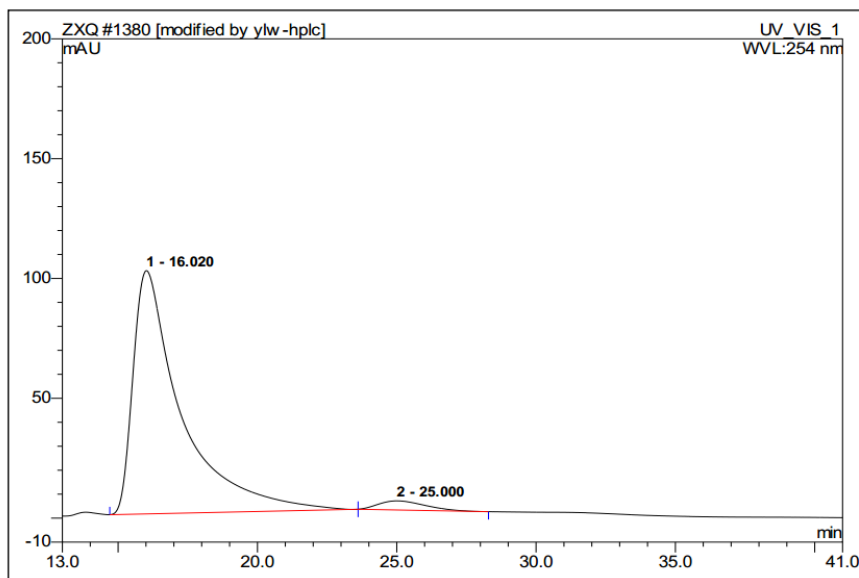

| No.           | Ret.Time<br>min | Peak Name | Height<br>mAU | Area<br>mAU*min | Rel.Area<br>% | Amount<br>n.a. | Type |
|---------------|-----------------|-----------|---------------|-----------------|---------------|----------------|------|
| 1             | 16.02           | n.a.      | 101.471       | 203.430         | 96.51         | n.a.           | BMB* |
| 2             | 25.00           | n.a.      | 3.791         | 7.346           | 3.49          | n.a.           | bMB* |
| <b>Total:</b> |                 |           | 105.262       | 210.776         | 100.00        | 0.000          |      |

2b: ADH, *n*-hexane/2-propanol = 85/15,  $v = 1.0 \text{ mL min}^{-1}$ ,  $\lambda = 254 \text{ nm}$

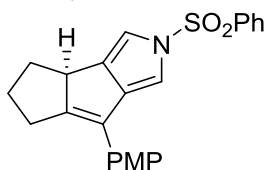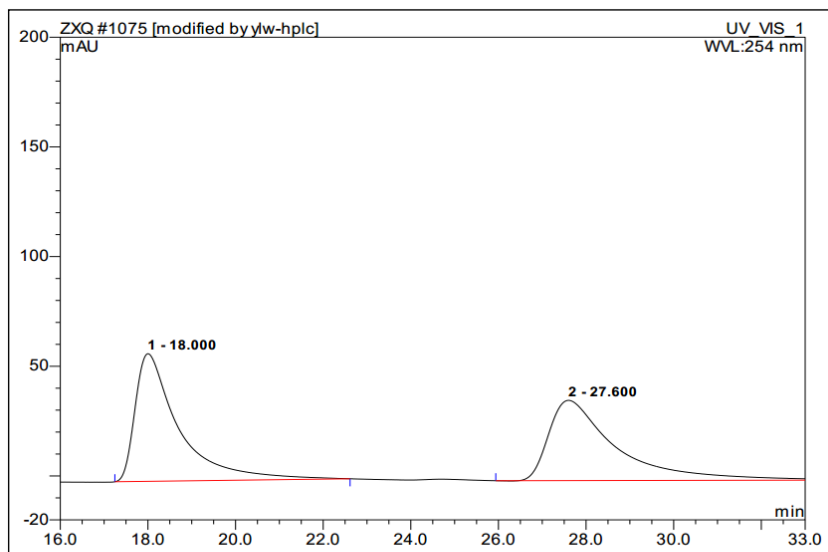

| No.           | Ret.Time<br>min | Peak Name | Height<br>mAU | Area<br>mAU*min | Rel.Area<br>% | Amount<br>n.a. | Type |
|---------------|-----------------|-----------|---------------|-----------------|---------------|----------------|------|
| 1             | 18.00           | n.a.      | 58.158        | 67.162          | 50.81         | n.a.           | BMB* |
| 2             | 27.60           | n.a.      | 36.574        | 65.013          | 49.19         | n.a.           | BMB* |
| <b>Total:</b> |                 |           | 94.732        | 132.175         | 100.00        | 0.000          |      |

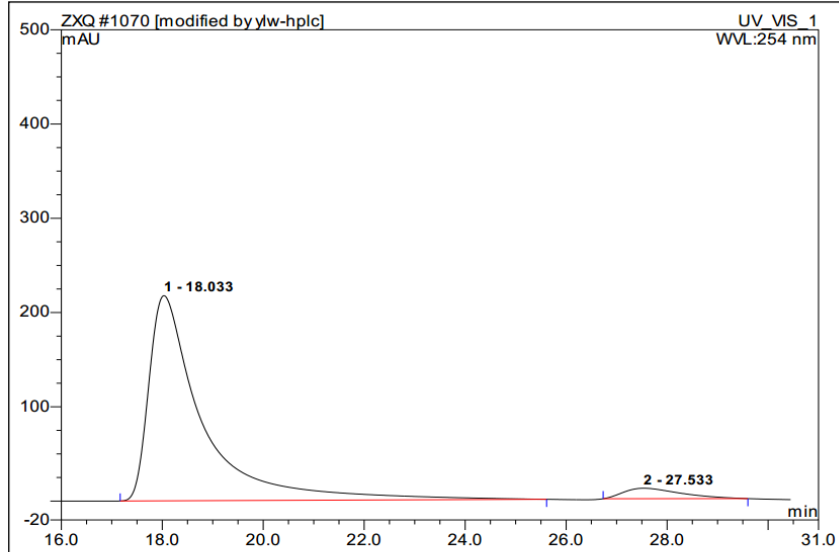

| No.           | Ret.Time<br>min | Peak Name | Height<br>mAU | Area<br>mAU*min | Rel.Area<br>% | Amount<br>n.a. | Type |
|---------------|-----------------|-----------|---------------|-----------------|---------------|----------------|------|
| 1             | 18.03           | n.a.      | 217.635       | 269.093         | 94.88         | n.a.           | BMB* |
| 2             | 27.53           | n.a.      | 11.090        | 14.508          | 5.12          | n.a.           | BMB* |
| <b>Total:</b> |                 |           | 228.725       | 283.601         | 100.00        | 0.000          |      |



2c: IC, *n*-hexane/2-propanol = 70/30,  $v = 1.0 \text{ mL min}^{-1}$ ,  $\lambda = 254 \text{ nm}$

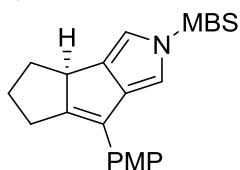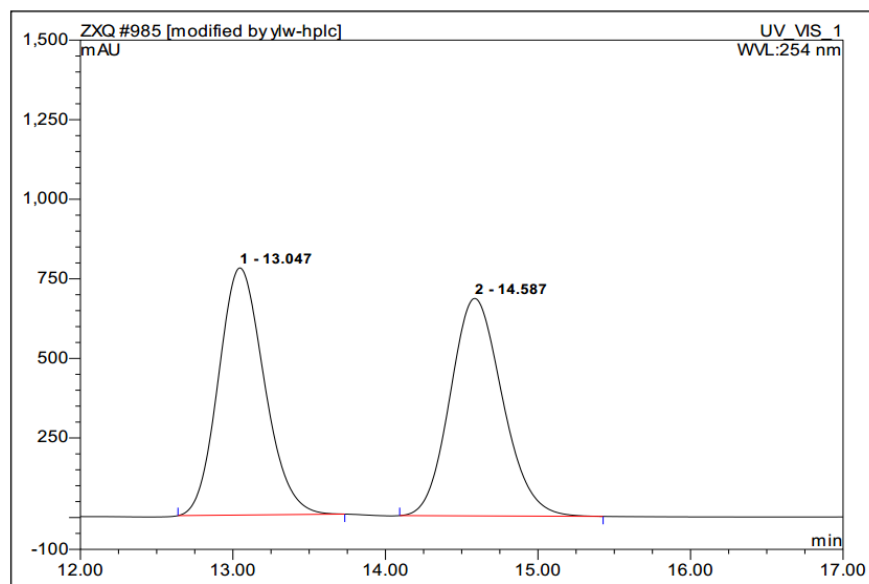

| No.           | Ret.Time<br>min | Peak Name | Height<br>mAU | Area<br>mAU*min | Rel.Area<br>% | Amount<br>n.a. | Type |
|---------------|-----------------|-----------|---------------|-----------------|---------------|----------------|------|
| 1             | 13.05           | n.a.      | 776.578       | 270.480         | 49.89         | n.a.           | BMB* |
| 2             | 14.59           | n.a.      | 683.281       | 271.708         | 50.11         | n.a.           | BMB* |
| <b>Total:</b> |                 |           | 1459.859      | 542.188         | 100.00        | 0.000          |      |

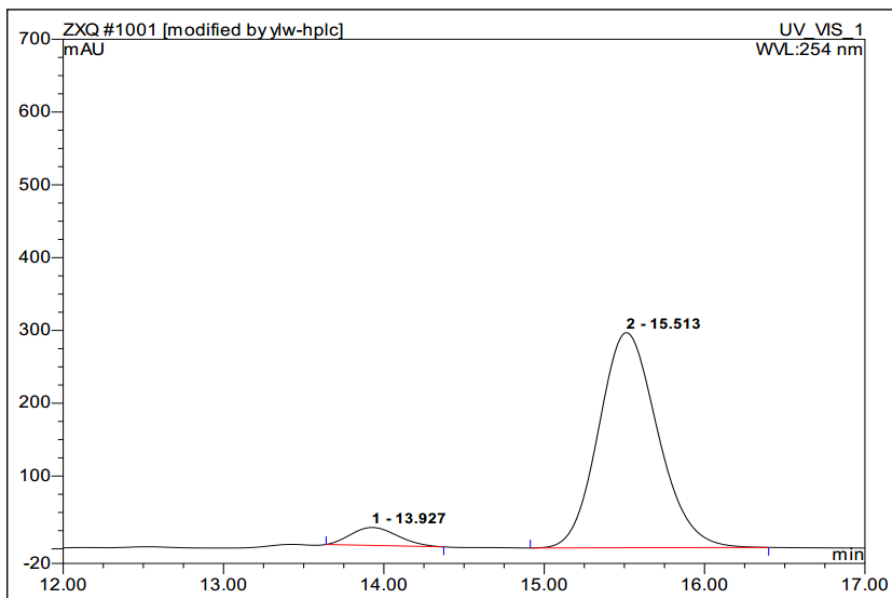

| No.           | Ret.Time<br>min | Peak Name | Height<br>mAU | Area<br>mAU*min | Rel.Area<br>% | Amount<br>n.a. | Type |
|---------------|-----------------|-----------|---------------|-----------------|---------------|----------------|------|
| 1             | 13.93           | n.a.      | 24.603        | 8.303           | 6.17          | n.a.           | BMB* |
| 2             | 15.51           | n.a.      | 295.475       | 126.192         | 93.83         | n.a.           | BMB* |
| <b>Total:</b> |                 |           | 320.078       | 134.496         | 100.00        | 0.000          |      |

2d: ASH, *n*-hexane/2-propanol = 85/15,  $v = 1.0 \text{ mL min}^{-1}$ ,  $\lambda = 254 \text{ nm}$

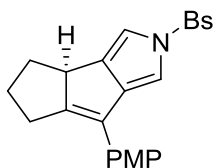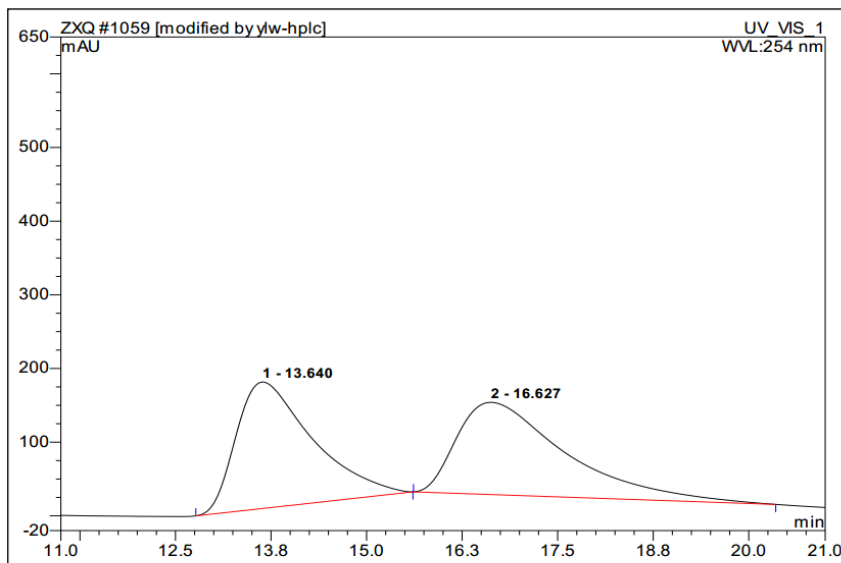

| No.           | Ret.Time min | Peak Name | Height mAU | Area mAU*min | Rel.Area % | Amount n.a. | Type |
|---------------|--------------|-----------|------------|--------------|------------|-------------|------|
| 1             | 13.64        | n.a.      | 171.672    | 198.084      | 49.11      | n.a.        | BMB* |
| 2             | 16.63        | n.a.      | 125.112    | 205.303      | 50.89      | n.a.        | BMB* |
| <b>Total:</b> |              |           | 296.785    | 403.387      | 100.00     | 0.000       |      |

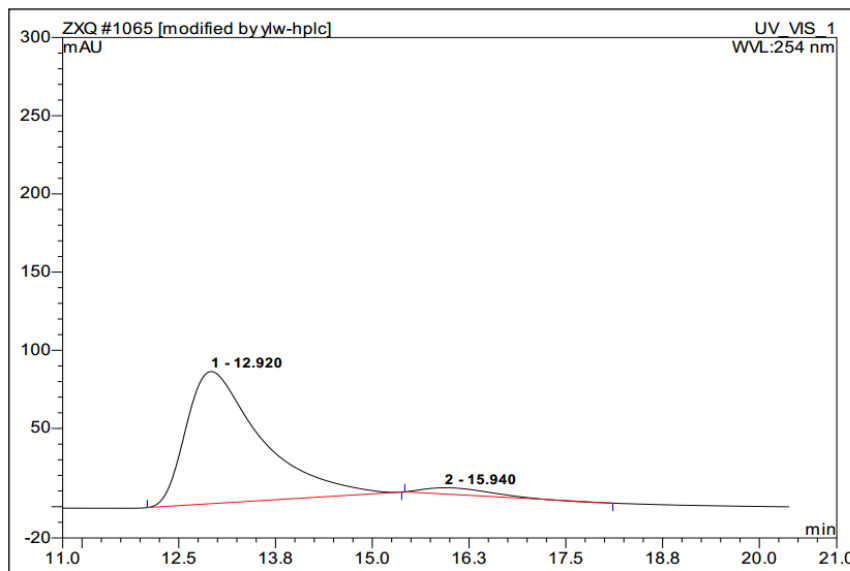

| No.           | Ret.Time min | Peak Name | Height mAU | Area mAU*min | Rel.Area % | Amount n.a. | Type |
|---------------|--------------|-----------|------------|--------------|------------|-------------|------|
| 1             | 12.92        | n.a.      | 84.469     | 94.677       | 96.01      | n.a.        | BMB* |
| 2             | 15.94        | n.a.      | 3.973      | 3.939        | 3.99       | n.a.        | BMB* |
| <b>Total:</b> |              |           | 88.441     | 98.616       | 100.00     | 0.000       |      |

2e: ASH, *n*-hexane/2-propanol = 85/15,  $v = 1.0 \text{ mL min}^{-1}$ ,  $\lambda = 254 \text{ nm}$

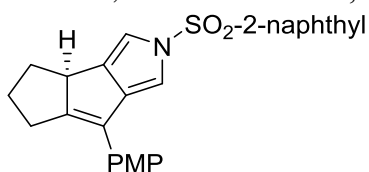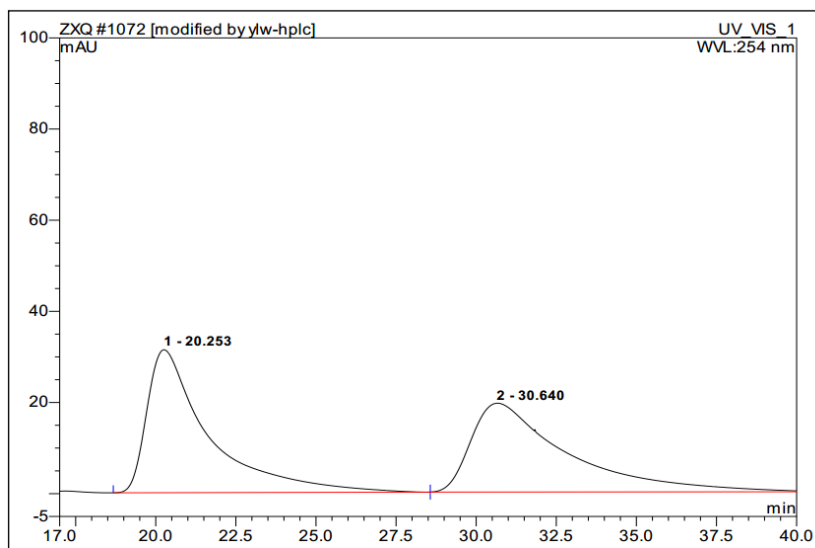

| No.           | Ret.Time<br>min | Peak Name | Height<br>mAU | Area<br>mAU*min | Rel.Area<br>% | Amount<br>n.a. | Type |
|---------------|-----------------|-----------|---------------|-----------------|---------------|----------------|------|
| 1             | 20.25           | n.a.      | 31.365        | 69.632          | 50.90         | n.a.           | BMB* |
| 2             | 30.64           | n.a.      | 19.484        | 67.160          | 49.10         | n.a.           | bMB* |
| <b>Total:</b> |                 |           | 50.848        | 136.793         | 100.00        | 0.000          |      |

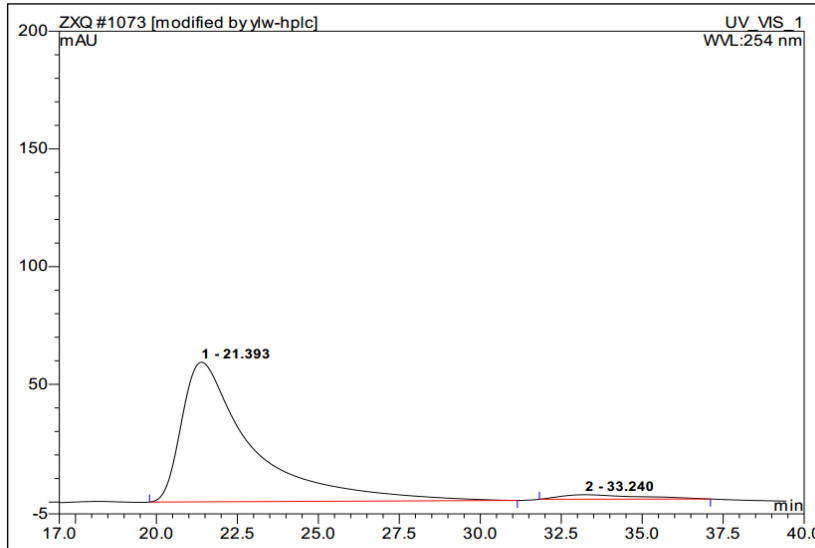

| No.           | Ret.Time<br>min | Peak Name | Height<br>mAU | Area<br>mAU*min | Rel.Area<br>% | Amount<br>n.a. | Type |
|---------------|-----------------|-----------|---------------|-----------------|---------------|----------------|------|
| 1             | 21.39           | n.a.      | 59.301        | 148.437         | 96.50         | n.a.           | BMB* |
| 2             | 33.24           | n.a.      | 1.900         | 5.390           | 3.50          | n.a.           | BMB* |
| <b>Total:</b> |                 |           | 61.201        | 153.827         | 100.00        | 0.000          |      |

2f: ADH, *n*-hexane/2-propanol = 85/15,  $v = 1.0 \text{ mL min}^{-1}$ ,  $\lambda = 254 \text{ nm}$

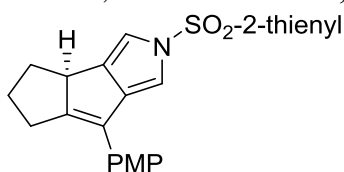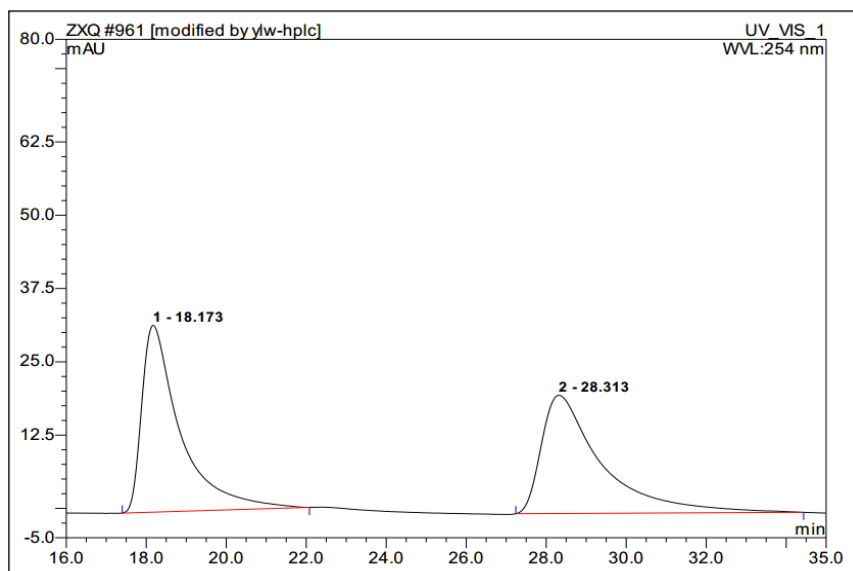

| No.           | Ret.Time min | Peak Name | Height mAU | Area mAU*min | Rel.Area % | Amount n.a. | Type |
|---------------|--------------|-----------|------------|--------------|------------|-------------|------|
| 1             | 18.17        | n.a.      | 31.850     | 35.527       | 50.37      | n.a.        | BMB* |
| 2             | 28.31        | n.a.      | 20.168     | 35.006       | 49.63      | n.a.        | BMB* |
| <b>Total:</b> |              |           | 52.018     | 70.533       | 100.00     | 0.000       |      |

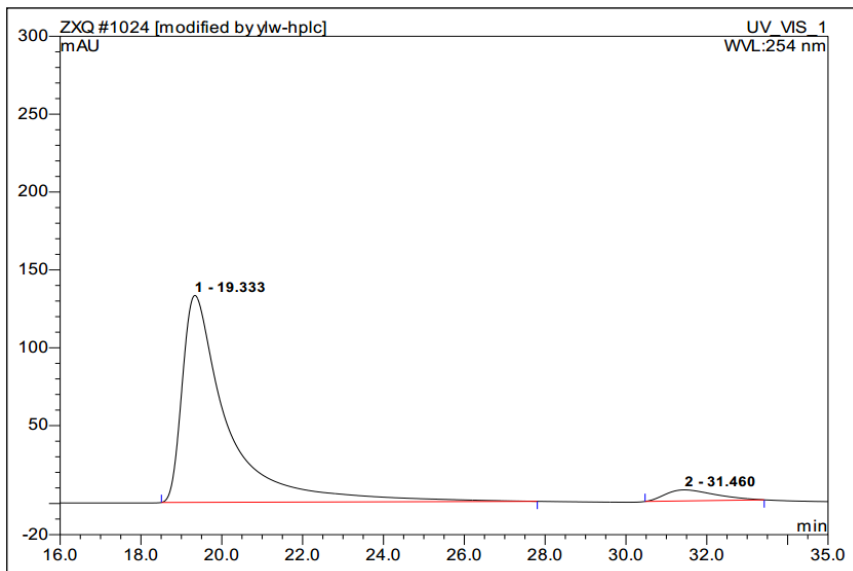

| No.           | Ret.Time min | Peak Name | Height mAU | Area mAU*min | Rel.Area % | Amount n.a. | Type |
|---------------|--------------|-----------|------------|--------------|------------|-------------|------|
| 1             | 19.33        | n.a.      | 132.876    | 173.074      | 94.48      | n.a.        | BMB* |
| 2             | 31.46        | n.a.      | 7.070      | 10.108       | 5.52       | n.a.        | BMB* |
| <b>Total:</b> |              |           | 139.947    | 183.182      | 100.00     | 0.000       |      |

2g: ASH, *n*-hexane/2-propanol = 50/50,  $v = 1.0 \text{ mL min}^{-1}$ ,  $\lambda = 254 \text{ nm}$

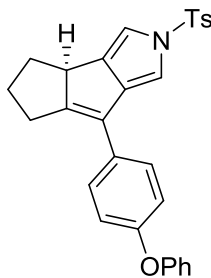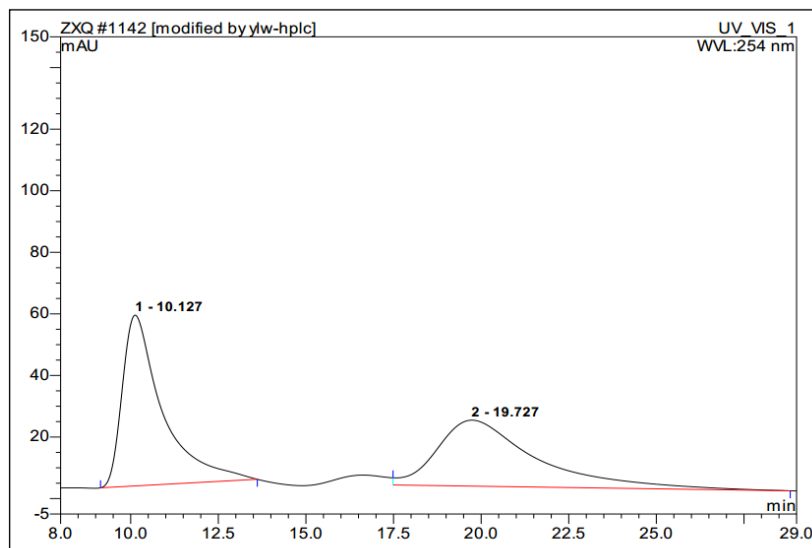

| No.           | Ret.Time<br>min | Peak Name | Height<br>mAU | Area<br>mAU*min | Rel.Area<br>% | Amount<br>n.a. | Type |
|---------------|-----------------|-----------|---------------|-----------------|---------------|----------------|------|
| 1             | 10.13           | n.a.      | 55.480        | 73.674          | 51.28         | n.a.           | BMB* |
| 2             | 19.73           | n.a.      | 21.430        | 69.996          | 48.72         | n.a.           | MB*  |
| <b>Total:</b> |                 |           | 76.910        | 143.670         | 100.00        | 0.000          |      |

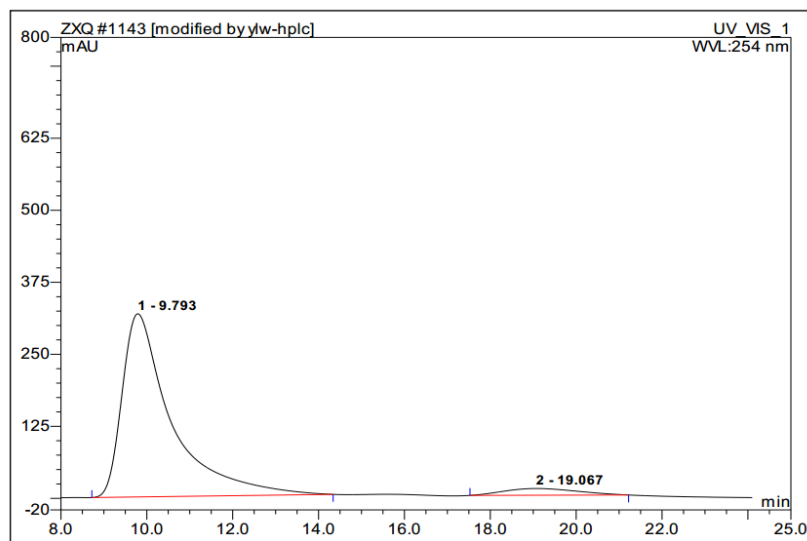

| No.           | Ret.Time<br>min | Peak Name | Height<br>mAU | Area<br>mAU*min | Rel.Area<br>% | Amount<br>n.a. | Type |
|---------------|-----------------|-----------|---------------|-----------------|---------------|----------------|------|
| 1             | 9.79            | n.a.      | 317.848       | 422.696         | 94.85         | n.a.           | BMB* |
| 2             | 19.07           | n.a.      | 11.676        | 22.974          | 5.15          | n.a.           | BMB* |
| <b>Total:</b> |                 |           | 329.524       | 445.670         | 100.00        | 0.000          |      |

**2h:** ASH, *n*-hexane/2-propanol = 70/30,  $v = 1.0 \text{ mL min}^{-1}$ ,  $\lambda = 254 \text{ nm}$

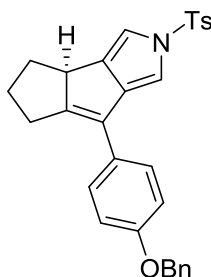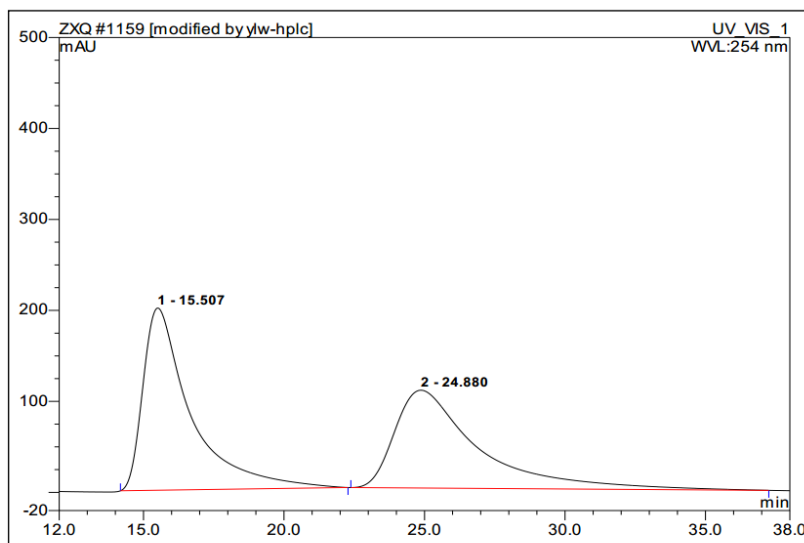

| No.           | Ret.Time<br>min | Peak Name | Height<br>mAU | Area<br>mAU*min | Rel.Area<br>% | Amount<br>n.a. | Type |
|---------------|-----------------|-----------|---------------|-----------------|---------------|----------------|------|
| 1             | 15.51           | n.a.      | 200.286       | 394.761         | 51.82         | n.a.           | BMB* |
| 2             | 24.88           | n.a.      | 107.519       | 367.019         | 48.18         | n.a.           | BMB* |
| <b>Total:</b> |                 |           | 307.805       | 761.780         | 100.00        | 0.000          |      |

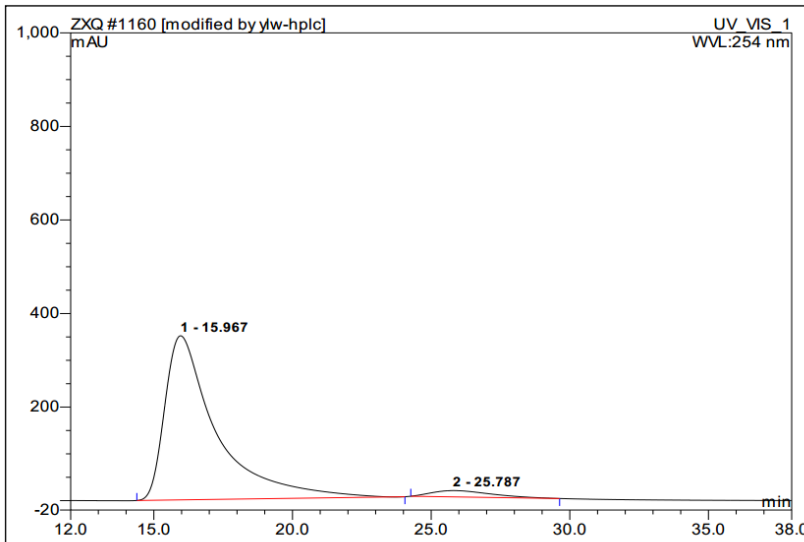

| No.           | Ret.Time<br>min | Peak Name | Height<br>mAU | Area<br>mAU*min | Rel.Area<br>% | Amount<br>n.a. | Type |
|---------------|-----------------|-----------|---------------|-----------------|---------------|----------------|------|
| 1             | 15.97           | n.a.      | 350.786       | 756.062         | 95.77         | n.a.           | BMB* |
| 2             | 25.79           | n.a.      | 13.421        | 33.395          | 4.23          | n.a.           | BMB* |
| <b>Total:</b> |                 |           | 364.208       | 789.457         | 100.00        | 0.000          |      |

2i: ASH, *n*-hexane/2-propanol = 98/2,  $\nu = 1.0 \text{ mL min}^{-1}$ ,  $\lambda = 254 \text{ nm}$

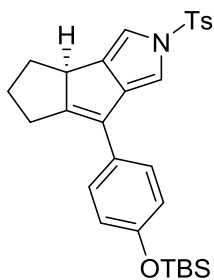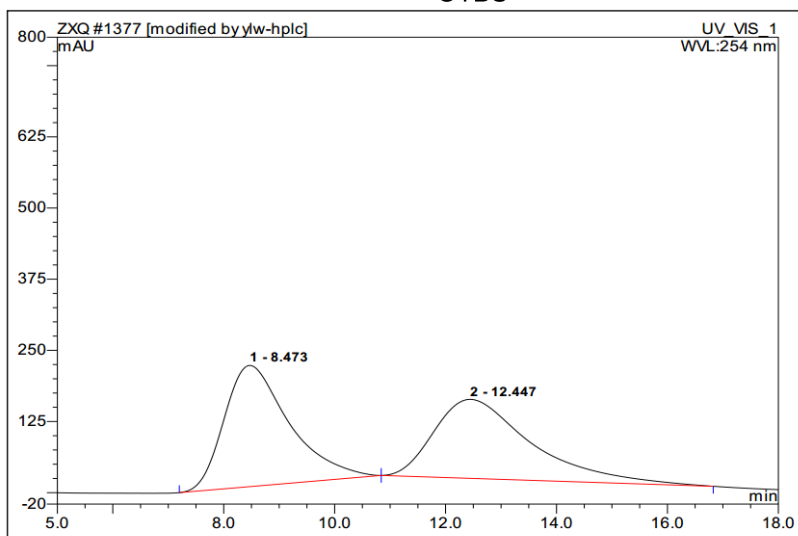

| No.           | Ret.Time<br>min | Peak Name | Height<br>mAU | Area<br>mAU*min | Rel.Area<br>% | Amount<br>n.a. | Type |
|---------------|-----------------|-----------|---------------|-----------------|---------------|----------------|------|
| 1             | 8.47            | n.a.      | 212.818       | 288.667         | 50.74         | n.a.           | BMb* |
| 2             | 12.45           | n.a.      | 138.685       | 280.194         | 49.26         | n.a.           | bMB* |
| <b>Total:</b> |                 |           | 351.502       | 568.861         | 100.00        | 0.000          |      |

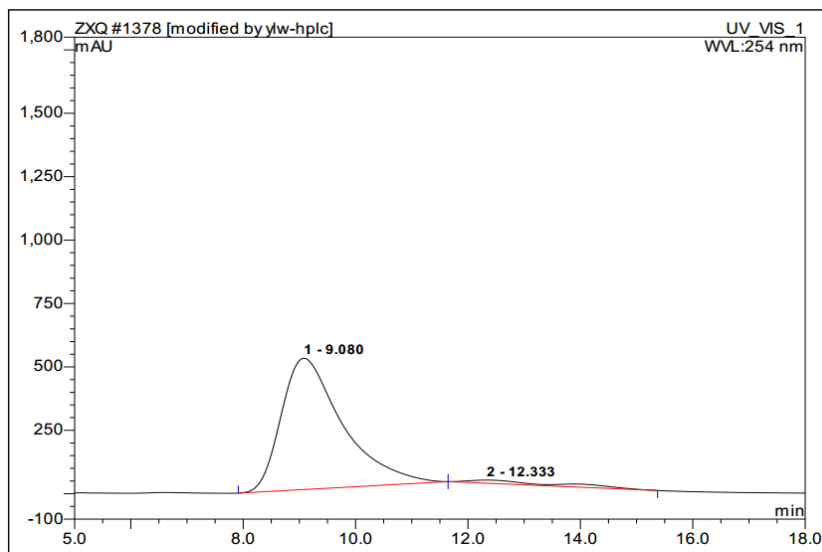

| No.           | Ret.Time<br>min | Peak Name | Height<br>mAU | Area<br>mAU*min | Rel.Area<br>% | Amount<br>n.a. | Type |
|---------------|-----------------|-----------|---------------|-----------------|---------------|----------------|------|
| 1             | 9.08            | n.a.      | 517.614       | 653.385         | 96.09         | n.a.           | BMb* |
| 2             | 12.33           | n.a.      | 12.494        | 26.573          | 3.91          | n.a.           | bMB* |
| <b>Total:</b> |                 |           | 530.108       | 679.957         | 100.00        | 0.000          |      |

2j: ASH, *n*-hexane/2-propanol = 99/1,  $v = 1.0 \text{ mL min}^{-1}$ ,  $\lambda = 254 \text{ nm}$

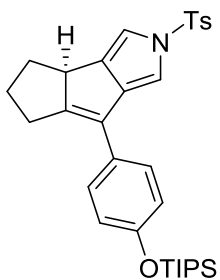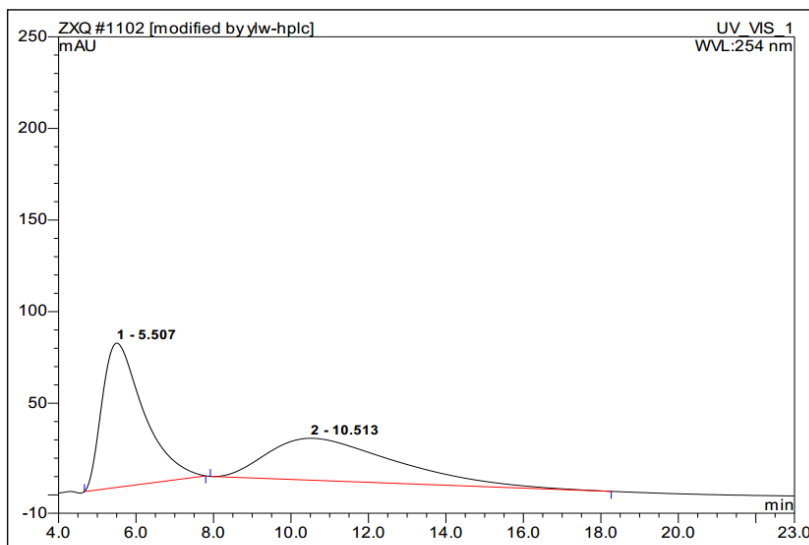

| No.           | Ret.Time min | Peak Name | Height mAU | Area mAU*min | Rel.Area % | Amount n.a. | Type |
|---------------|--------------|-----------|------------|--------------|------------|-------------|------|
| 1             | 5.51         | n.a.      | 78.713     | 98.058       | 52.68      | n.a.        | BMB* |
| 2             | 10.51        | n.a.      | 22.841     | 88.072       | 47.32      | n.a.        | BMB* |
| <b>Total:</b> |              |           | 101.554    | 186.130      | 100.00     | 0.000       |      |

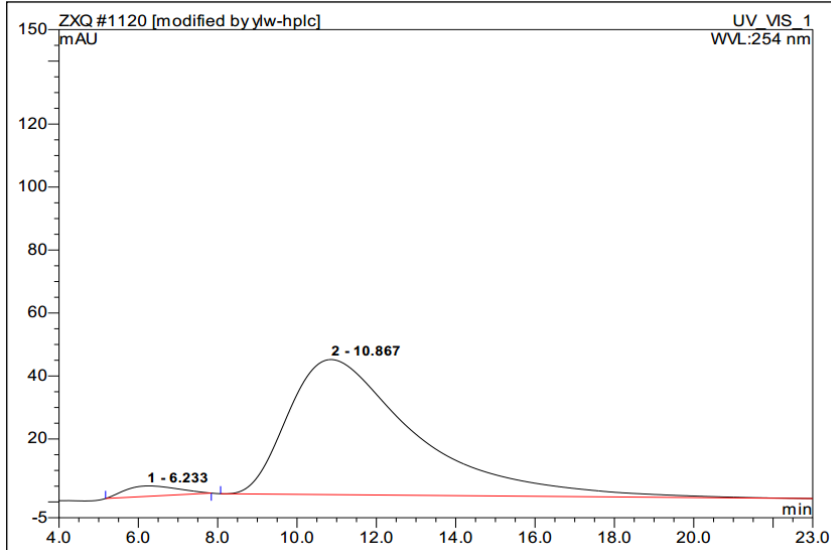

| No.           | Ret.Time min | Peak Name | Height mAU | Area mAU*min | Rel.Area % | Amount n.a. | Type |
|---------------|--------------|-----------|------------|--------------|------------|-------------|------|
| 1             | 6.23         | n.a.      | 3.309      | 5.082        | 3.10       | n.a.        | BMB* |
| 2             | 10.87        | n.a.      | 42.897     | 158.894      | 96.90      | n.a.        | BMB* |
| <b>Total:</b> |              |           | 46.206     | 163.976      | 100.00     | 0.000       |      |



**2k:** ASH, *n*-hexane/2-propanol = 80/20,  $v = 1.0 \text{ mL min}^{-1}$ ,  $\lambda = 254 \text{ nm}$

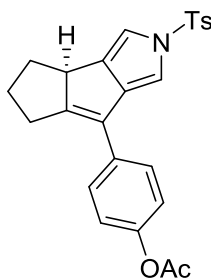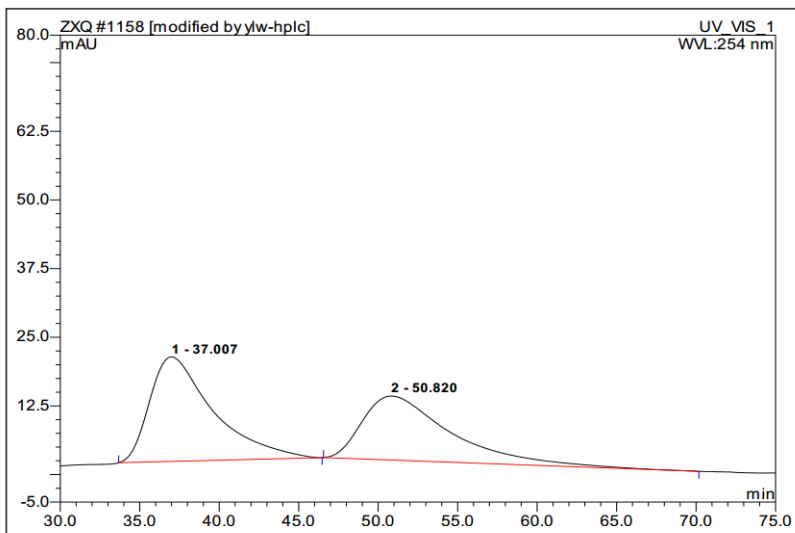

| No.           | Ret.Time<br>min | Peak Name | Height<br>mAU | Area<br>mAU*min | Rel.Area<br>% | Amount<br>n.a. | Type |
|---------------|-----------------|-----------|---------------|-----------------|---------------|----------------|------|
| 1             | 37.01           | n.a.      | 19.027        | 87.679          | 54.01         | n.a.           | BMB* |
| 2             | 50.82           | n.a.      | 11.652        | 74.664          | 45.99         | n.a.           | BMB* |
| <b>Total:</b> |                 |           | 30.678        | 162.343         | 100.00        | 0.000          |      |

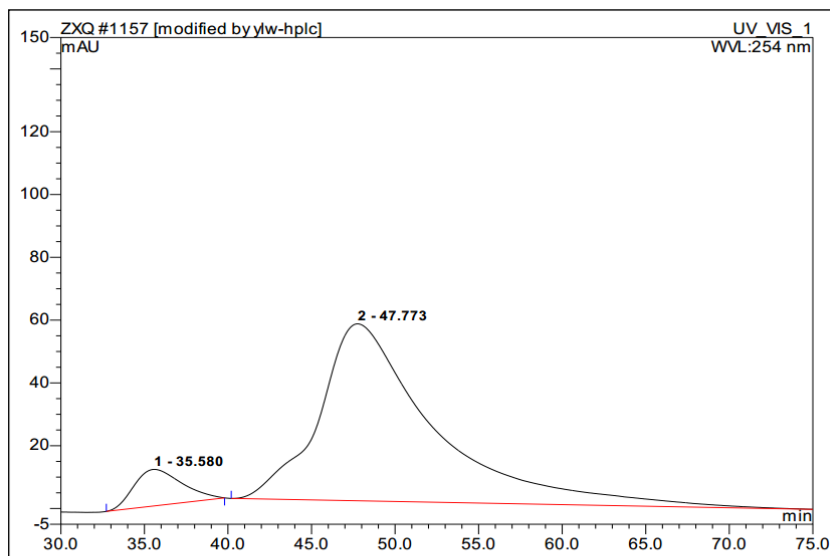

| No.           | Ret.Time<br>min | Peak Name | Height<br>mAU | Area<br>mAU*min | Rel.Area<br>% | Amount<br>n.a. | Type |
|---------------|-----------------|-----------|---------------|-----------------|---------------|----------------|------|
| 1             | 35.58           | n.a.      | 11.632        | 38.534          | 7.91          | n.a.           | BMB* |
| 2             | 47.77           | n.a.      | 56.353        | 448.628         | 92.09         | n.a.           | BMB* |
| <b>Total:</b> |                 |           | 67.986        | 487.162         | 100.00        | 0.000          |      |

2l: ASH, *n*-hexane/2-propanol = 50/50,  $v = 1.0 \text{ mL min}^{-1}$ ,  $\lambda = 254 \text{ nm}$

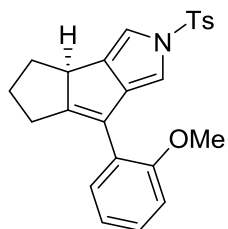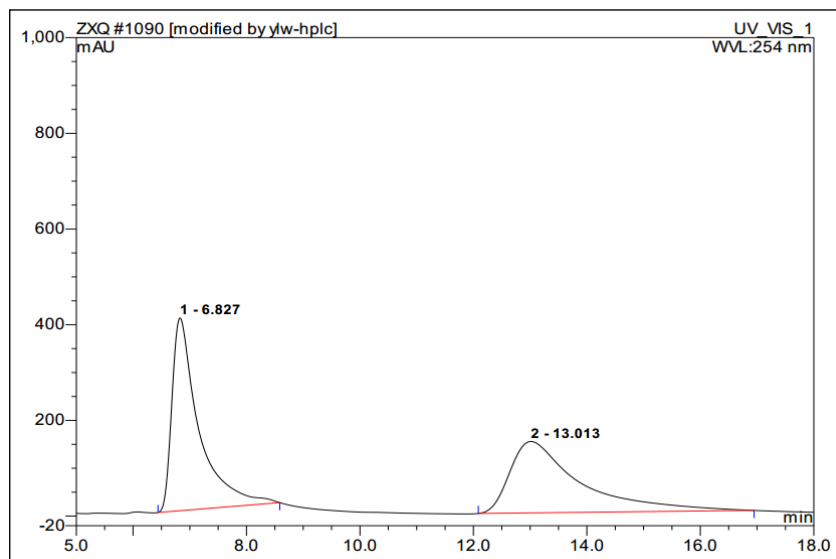

| No.           | Ret.Time min | Peak Name | Height mAU | Area mAU*min | Rel.Area % | Amount n.a. | Type |
|---------------|--------------|-----------|------------|--------------|------------|-------------|------|
| 1             | 6.83         | n.a.      | 402.794    | 222.206      | 51.12      | n.a.        | BMB* |
| 2             | 13.01        | n.a.      | 149.220    | 212.441      | 48.88      | n.a.        | BMB* |
| <b>Total:</b> |              |           | 552.014    | 434.647      | 100.00     | 0.000       |      |

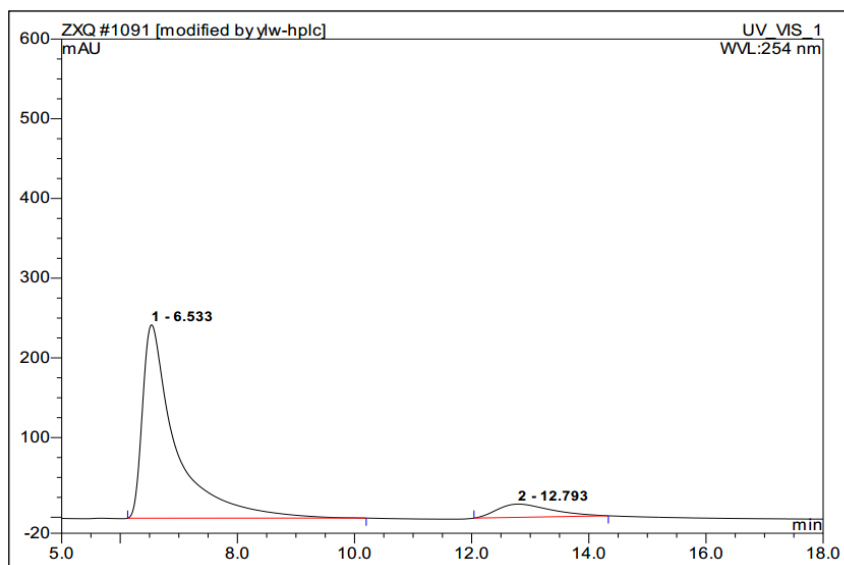

| No.           | Ret.Time min | Peak Name | Height mAU | Area mAU*min | Rel.Area % | Amount n.a. | Type |
|---------------|--------------|-----------|------------|--------------|------------|-------------|------|
| 1             | 6.53         | n.a.      | 242.594    | 160.414      | 90.09      | n.a.        | BMB* |
| 2             | 12.79        | n.a.      | 16.628     | 17.639       | 9.91       | n.a.        | BMB* |
| <b>Total:</b> |              |           | 259.222    | 178.053      | 100.00     | 0.000       |      |

**2m:** ASH, *n*-hexane/2-propanol = 80/20,  $v = 1.0 \text{ mL min}^{-1}$ ,  $\lambda = 254 \text{ nm}$

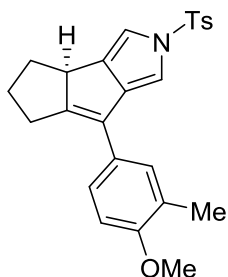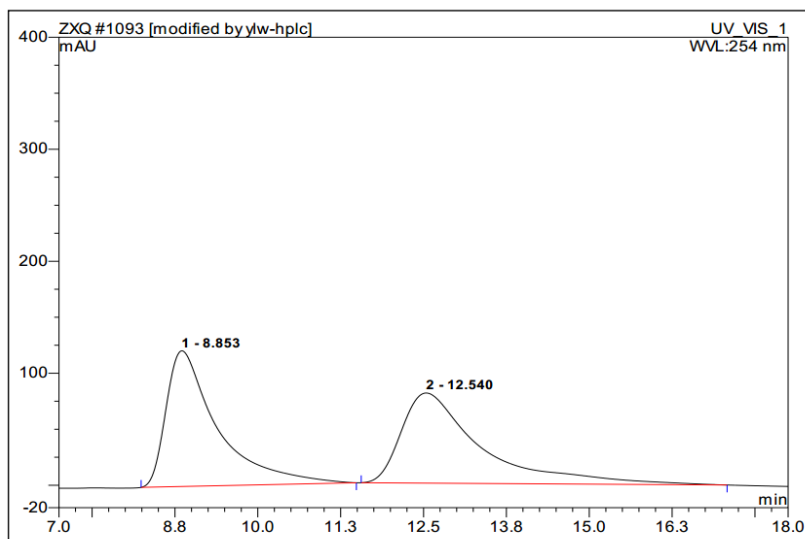

| No.           | Ret.Time min | Peak Name | Height mAU | Area mAU*min | Rel.Area % | Amount n.a. | Type |
|---------------|--------------|-----------|------------|--------------|------------|-------------|------|
| 1             | 8.85         | n.a.      | 121.132    | 108.500      | 49.43      | n.a.        | BMB* |
| 2             | 12.54        | n.a.      | 80.474     | 110.987      | 50.57      | n.a.        | BMB* |
| <b>Total:</b> |              |           | 201.606    | 219.487      | 100.00     | 0.000       |      |

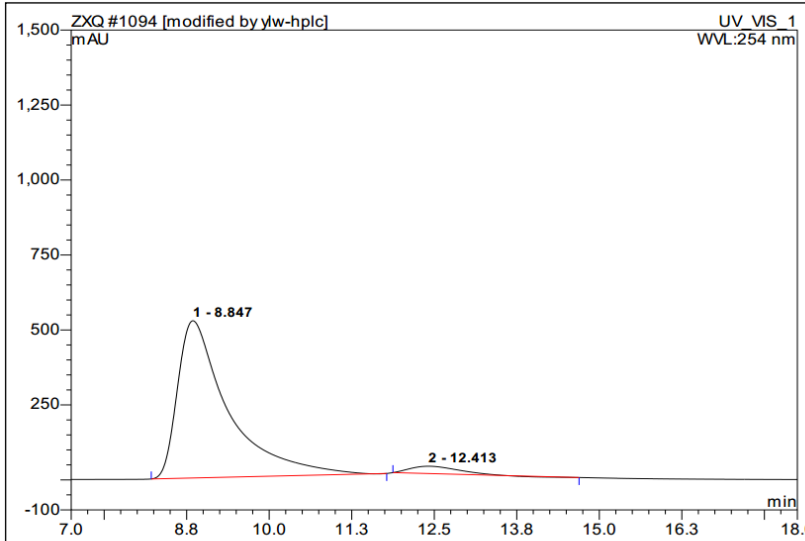

| No.           | Ret.Time min | Peak Name | Height mAU | Area mAU*min | Rel.Area % | Amount n.a. | Type |
|---------------|--------------|-----------|------------|--------------|------------|-------------|------|
| 1             | 8.85         | n.a.      | 524.266    | 466.048      | 95.90      | n.a.        | BMB* |
| 2             | 12.41        | n.a.      | 24.443     | 19.931       | 4.10       | n.a.        | BMB* |
| <b>Total:</b> |              |           | 548.710    | 485.979      | 100.00     | 0.000       |      |

**2n**: ASH, *n*-hexane/2-propanol = 80/20,  $v = 1.0 \text{ mL min}^{-1}$ ,  $\lambda = 254 \text{ nm}$

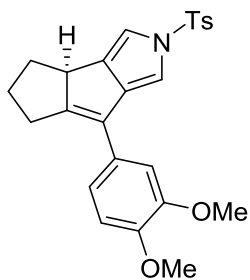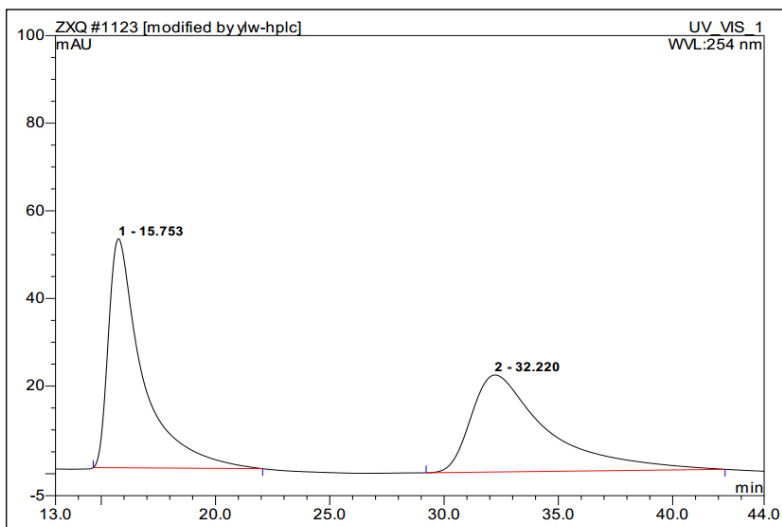

| No.           | Ret.Time<br>min | Peak Name | Height<br>mAU | Area<br>mAU*min | Rel.Area<br>% | Amount<br>n.a. | Type |
|---------------|-----------------|-----------|---------------|-----------------|---------------|----------------|------|
| 1             | 15.75           | n.a.      | 52.254        | 90.423          | 51.65         | n.a.           | BMB* |
| 2             | 32.22           | n.a.      | 22.132        | 84.659          | 48.35         | n.a.           | BMB* |
| <b>Total:</b> |                 |           | 74.385        | 175.082         | 100.00        | 0.000          |      |

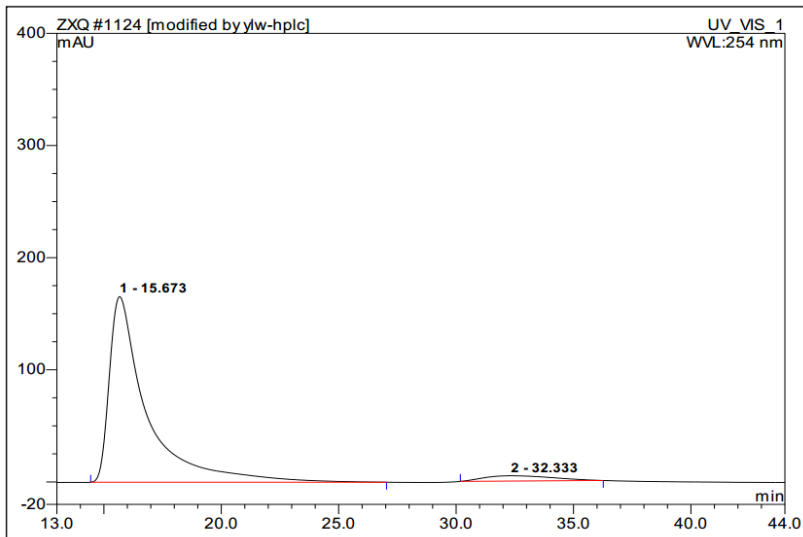

| No.           | Ret.Time<br>min | Peak Name | Height<br>mAU | Area<br>mAU*min | Rel.Area<br>% | Amount<br>n.a. | Type |
|---------------|-----------------|-----------|---------------|-----------------|---------------|----------------|------|
| 1             | 15.67           | n.a.      | 165.442       | 306.673         | 95.06         | n.a.           | BMB* |
| 2             | 32.33           | n.a.      | 4.705         | 15.925          | 4.94          | n.a.           | BMB* |
| <b>Total:</b> |                 |           | 170.148       | 322.598         | 100.00        | 0.000          |      |

2o: ASH, *n*-hexane/2-propanol = 85/15,  $v = 1.0 \text{ mL min}^{-1}$ ,  $\lambda = 254 \text{ nm}$

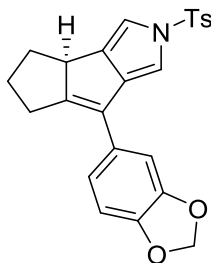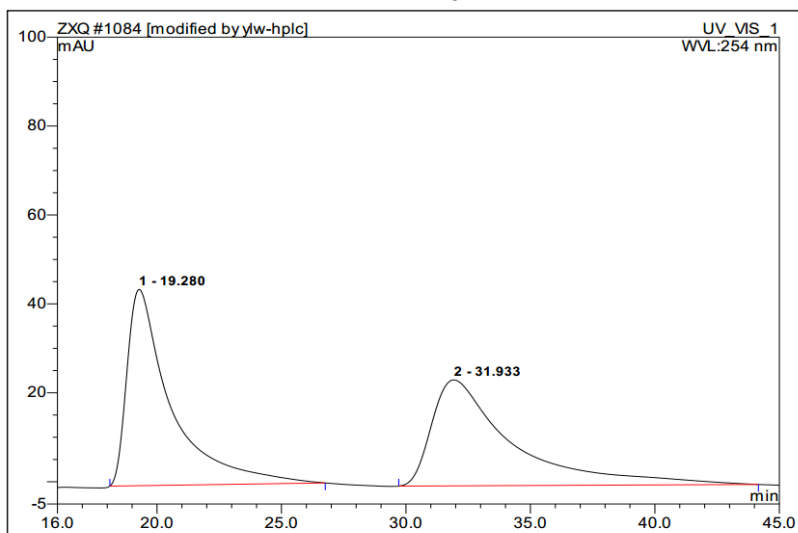

| No.           | Ret.Time<br>min | Peak Name | Height<br>mAU | Area<br>mAU*min | Rel.Area<br>% | Amount<br>n.a. | Type |
|---------------|-----------------|-----------|---------------|-----------------|---------------|----------------|------|
| 1             | 19.28           | n.a.      | 44.143        | 90.668          | 50.53         | n.a.           | BMB* |
| 2             | 31.93           | n.a.      | 23.827        | 88.751          | 49.47         | n.a.           | BMB* |
| <b>Total:</b> |                 |           | 67.971        | 179.419         | 100.00        | 0.000          |      |

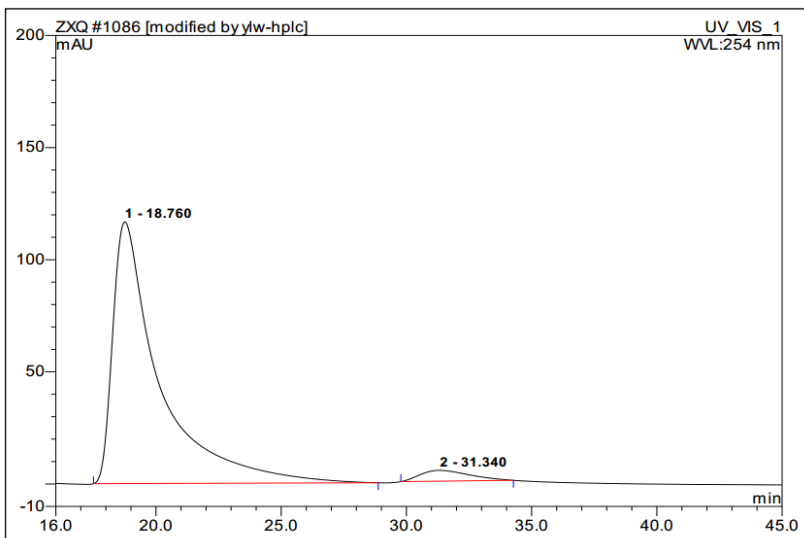

| No.           | Ret.Time<br>min | Peak Name | Height<br>mAU | Area<br>mAU*min | Rel.Area<br>% | Amount<br>n.a. | Type |
|---------------|-----------------|-----------|---------------|-----------------|---------------|----------------|------|
| 1             | 18.76           | n.a.      | 116.710       | 251.741         | 95.82         | n.a.           | BMB* |
| 2             | 31.34           | n.a.      | 4.824         | 10.979          | 4.18          | n.a.           | BMB* |
| <b>Total:</b> |                 |           | 121.534       | 262.720         | 100.00        | 0.000          |      |

**2p:** IC, *n*-hexane/2-propanol = 80/20,  $v = 1.0 \text{ mL min}^{-1}$ ,  $\lambda = 254 \text{ nm}$

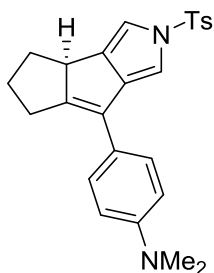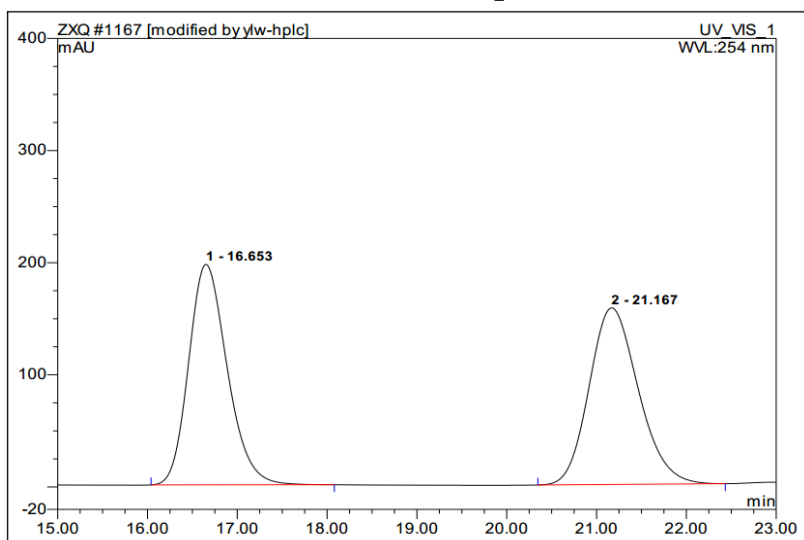

| No.           | Ret.Time<br>min | Peak Name | Height<br>mAU | Area<br>mAU*min | Rel.Area<br>% | Amount<br>n.a. | Type |
|---------------|-----------------|-----------|---------------|-----------------|---------------|----------------|------|
| 1             | 16.65           | n.a.      | 196.581       | 97.908          | 49.48         | n.a.           | BMB* |
| 2             | 21.17           | n.a.      | 157.504       | 99.951          | 50.52         | n.a.           | BMB* |
| <b>Total:</b> |                 |           | 354.085       | 197.859         | 100.00        | 0.000          |      |

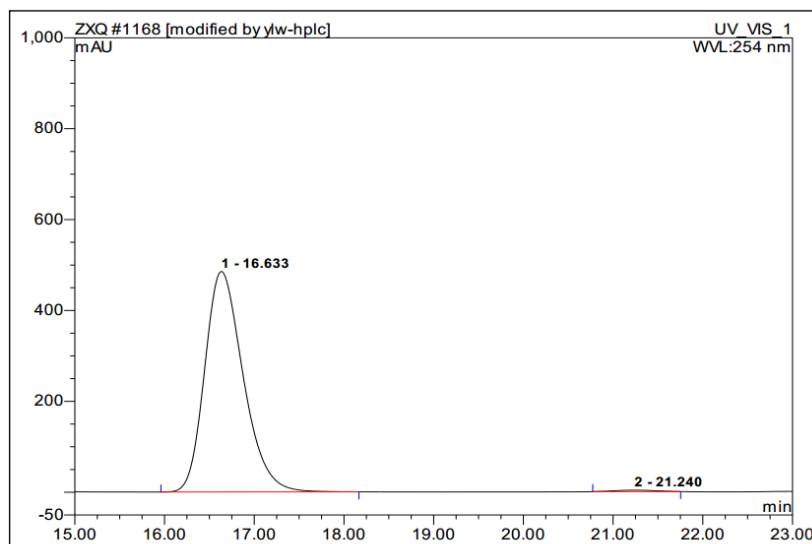

| No.           | Ret.Time<br>min | Peak Name | Height<br>mAU | Area<br>mAU*min | Rel.Area<br>% | Amount<br>n.a. | Type |
|---------------|-----------------|-----------|---------------|-----------------|---------------|----------------|------|
| 1             | 16.63           | n.a.      | 485.274       | 241.175         | 99.32         | n.a.           | BMB* |
| 2             | 21.24           | n.a.      | 3.124         | 1.659           | 0.68          | n.a.           | BMB* |
| <b>Total:</b> |                 |           | 488.397       | 242.834         | 100.00        | 0.000          |      |

2q: IC, *n*-hexane/2-propanol = 70/30,  $v = 1.0 \text{ mL min}^{-1}$ ,  $\lambda = 254 \text{ nm}$

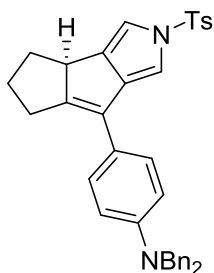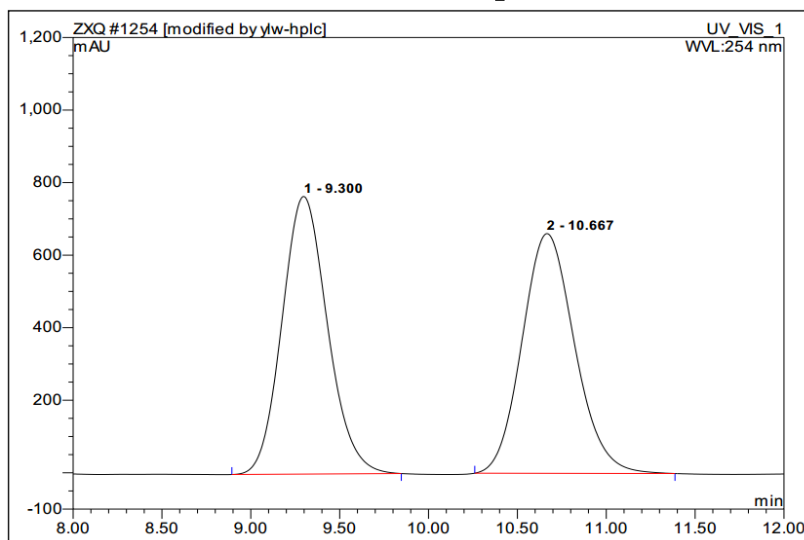

| No.           | Ret.Time min | Peak Name | Height mAU | Area mAU*min | Rel.Area % | Amount n.a. | Type |
|---------------|--------------|-----------|------------|--------------|------------|-------------|------|
| 1             | 9.30         | n.a.      | 765.335    | 227.052      | 50.06      | n.a.        | BMB* |
| 2             | 10.67        | n.a.      | 660.933    | 226.507      | 49.94      | n.a.        | BMB* |
| <b>Total:</b> |              |           | 1426.269   | 453.558      | 100.00     | 0.000       |      |

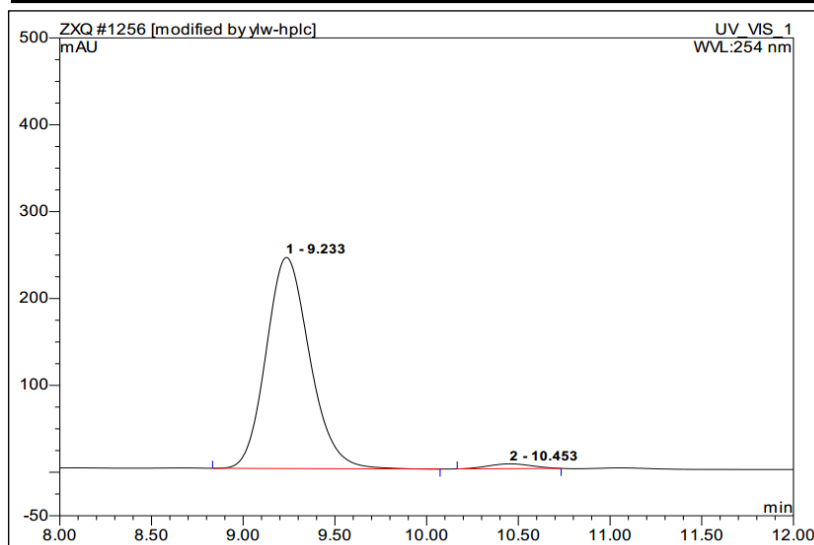

| No.           | Ret.Time min | Peak Name | Height mAU | Area mAU*min | Rel.Area % | Amount n.a. | Type |
|---------------|--------------|-----------|------------|--------------|------------|-------------|------|
| 1             | 9.23         | n.a.      | 242.999    | 67.084       | 97.79      | n.a.        | BMB* |
| 2             | 10.45        | n.a.      | 5.495      | 1.518        | 2.21       | n.a.        | BMB* |
| <b>Total:</b> |              |           | 248.494    | 68.601       | 100.00     | 0.000       |      |

2r: IC, *n*-hexane/2-propanol = 70/30,  $v = 1.0 \text{ mL min}^{-1}$ ,  $\lambda = 254 \text{ nm}$

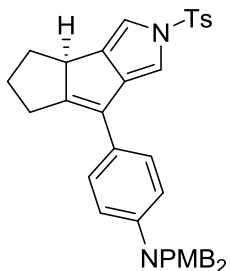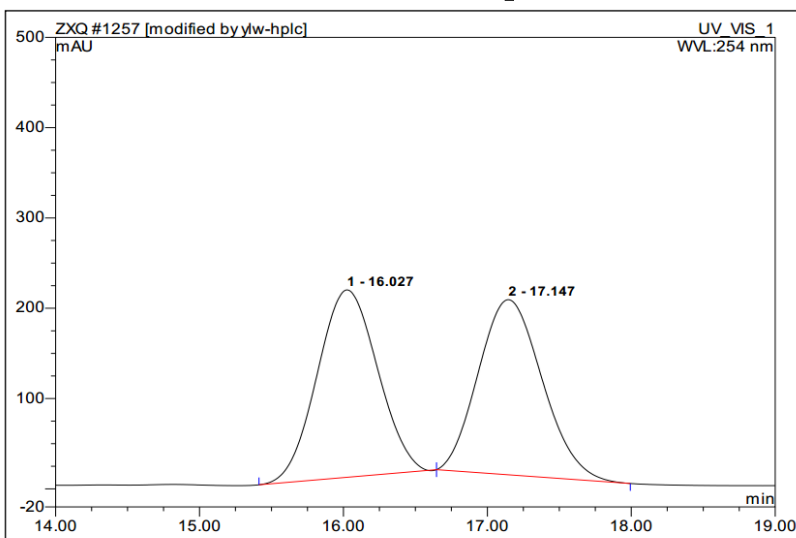

| No.           | Ret.Time<br>min | Peak Name | Height<br>mAU | Area<br>mAU*min | Rel.Area<br>% | Amount<br>n.a. | Type |
|---------------|-----------------|-----------|---------------|-----------------|---------------|----------------|------|
| 1             | 16.03           | n.a.      | 207.465       | 100.403         | 50.16         | n.a.           | BMb* |
| 2             | 17.15           | n.a.      | 193.899       | 99.774          | 49.84         | n.a.           | bMB* |
| <b>Total:</b> |                 |           | 401.363       | 200.176         | 100.00        | 0.000          |      |

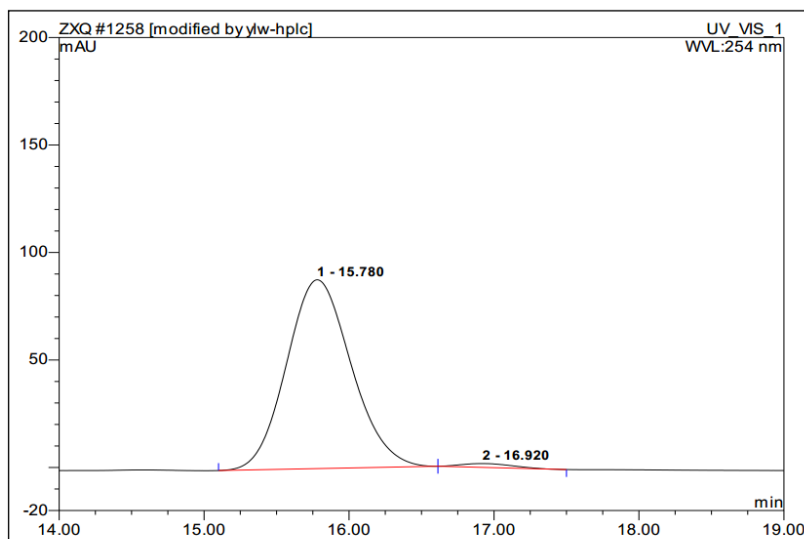

| No.           | Ret.Time<br>min | Peak Name | Height<br>mAU | Area<br>mAU*min | Rel.Area<br>% | Amount<br>n.a. | Type |
|---------------|-----------------|-----------|---------------|-----------------|---------------|----------------|------|
| 1             | 15.78           | n.a.      | 87.824        | 45.464          | 98.41         | n.a.           | BMb* |
| 2             | 16.92           | n.a.      | 1.780         | 0.734           | 1.59          | n.a.           | bMB* |
| <b>Total:</b> |                 |           | 89.603        | 46.198          | 100.00        | 0.000          |      |



2s: ASH, *n*-hexane/2-propanol = 80/20,  $v = 1.0 \text{ mL min}^{-1}$ ,  $\lambda = 254 \text{ nm}$

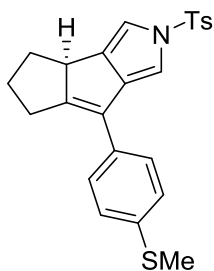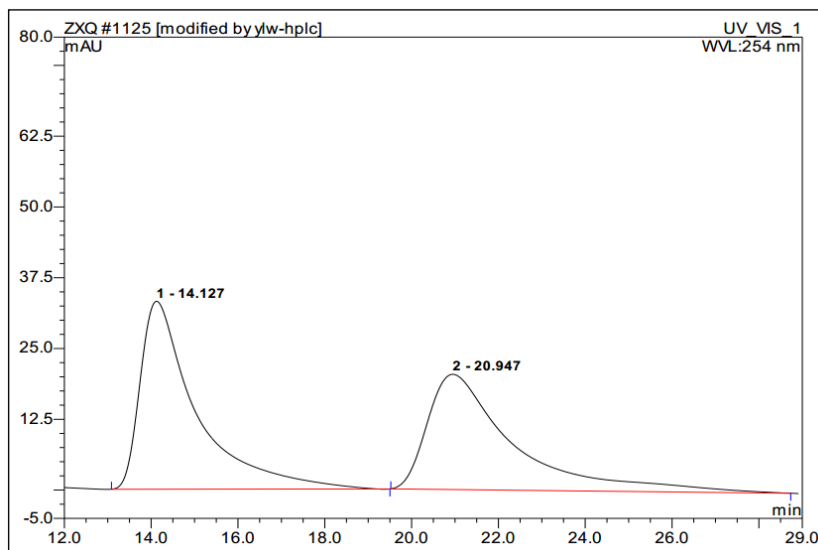

| No.           | Ret.Time<br>min | Peak Name | Height<br>mAU | Area<br>mAU*min | Rel.Area<br>% | Amount<br>n.a. | Type |
|---------------|-----------------|-----------|---------------|-----------------|---------------|----------------|------|
| 1             | 14.13           | n.a.      | 33.190        | 49.631          | 51.84         | n.a.           | BMB* |
| 2             | 20.95           | n.a.      | 20.349        | 46.105          | 48.16         | n.a.           | BMB* |
| <b>Total:</b> |                 |           | 53.539        | 95.736          | 100.00        | 0.000          |      |

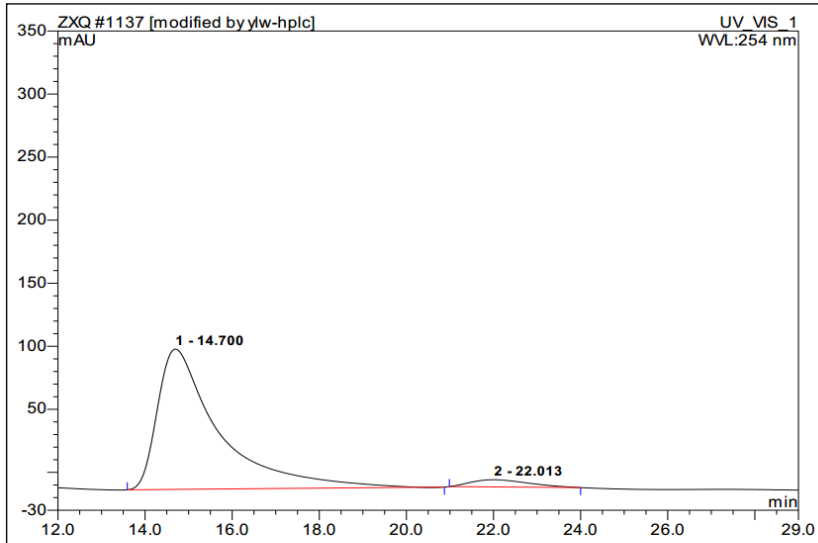

| No.           | Ret.Time<br>min | Peak Name | Height<br>mAU | Area<br>mAU*min | Rel.Area<br>% | Amount<br>n.a. | Type |
|---------------|-----------------|-----------|---------------|-----------------|---------------|----------------|------|
| 1             | 14.70           | n.a.      | 111.242       | 180.955         | 95.39         | n.a.           | BMB* |
| 2             | 22.01           | n.a.      | 5.700         | 8.753           | 4.61          | n.a.           | BMB* |
| <b>Total:</b> |                 |           | 116.942       | 189.708         | 100.00        | 0.000          |      |

2t: ASH, *n*-hexane/2-propanol = 90/10,  $v = 1.0 \text{ mL min}^{-1}$ ,  $\lambda = 254 \text{ nm}$

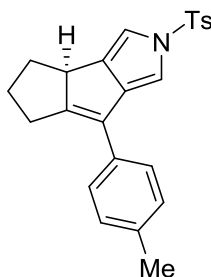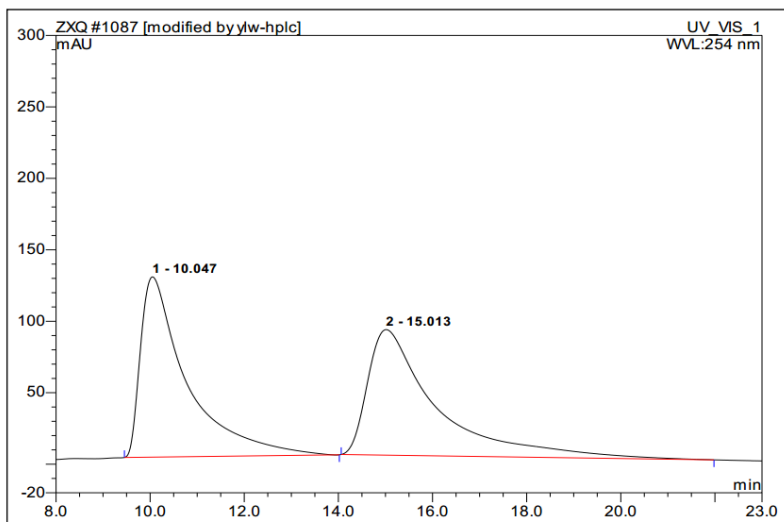

| No.           | Ret.Time<br>min | Peak Name | Height<br>mAU | Area<br>mAU*min | Rel.Area<br>% | Amount<br>n.a. | Type |
|---------------|-----------------|-----------|---------------|-----------------|---------------|----------------|------|
| 1             | 10.05           | n.a.      | 126.117       | 143.579         | 49.45         | n.a.           | BMB* |
| 2             | 15.01           | n.a.      | 87.815        | 146.752         | 50.55         | n.a.           | BMB* |
| <b>Total:</b> |                 |           | 213.932       | 290.331         | 100.00        | 0.000          |      |

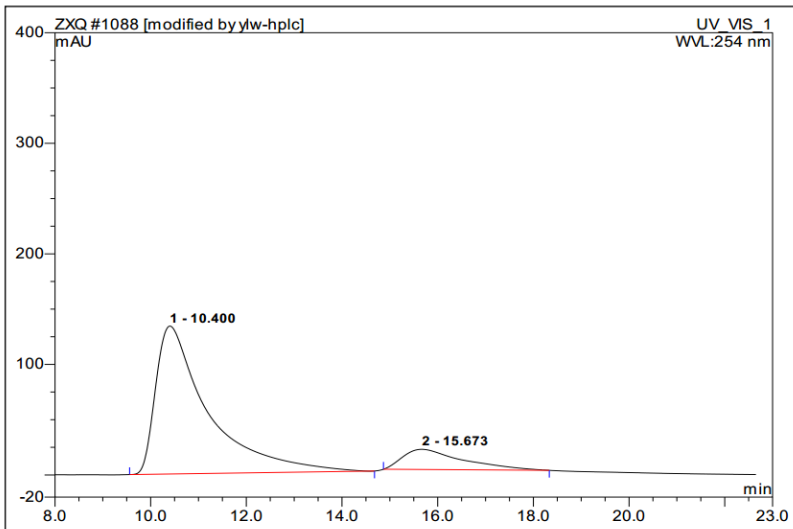

| No.           | Ret.Time<br>min | Peak Name | Height<br>mAU | Area<br>mAU*min | Rel.Area<br>% | Amount<br>n.a. | Type |
|---------------|-----------------|-----------|---------------|-----------------|---------------|----------------|------|
| 1             | 10.40           | n.a.      | 133.773       | 169.413         | 86.42         | n.a.           | BMB* |
| 2             | 15.67           | n.a.      | 18.255        | 26.611          | 13.58         | n.a.           | BMB* |
| <b>Total:</b> |                 |           | 152.028       | 196.024         | 100.00        | 0.000          |      |

**2u:** IC, *n*-hexane/2-propanol = 90/10,  $v = 1.0 \text{ mL min}^{-1}$ ,  $\lambda = 254 \text{ nm}$

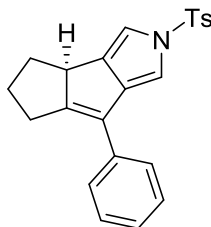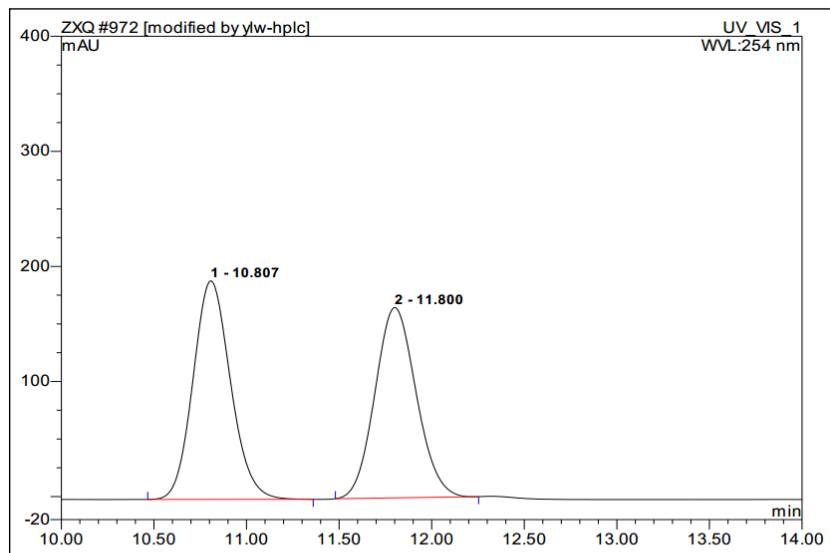

| No.           | Ret.Time min | Peak Name | Height mAU     | Area mAU*min  | Rel.Area %    | Amount n.a.  | Type |
|---------------|--------------|-----------|----------------|---------------|---------------|--------------|------|
| 1             | 10.81        | n.a.      | 189.939        | 44.554        | 51.08         | n.a.         | BMB* |
| 2             | 11.80        | n.a.      | 165.423        | 42.667        | 48.92         | n.a.         | BMB* |
| <b>Total:</b> |              |           | <b>355.362</b> | <b>87.221</b> | <b>100.00</b> | <b>0.000</b> |      |

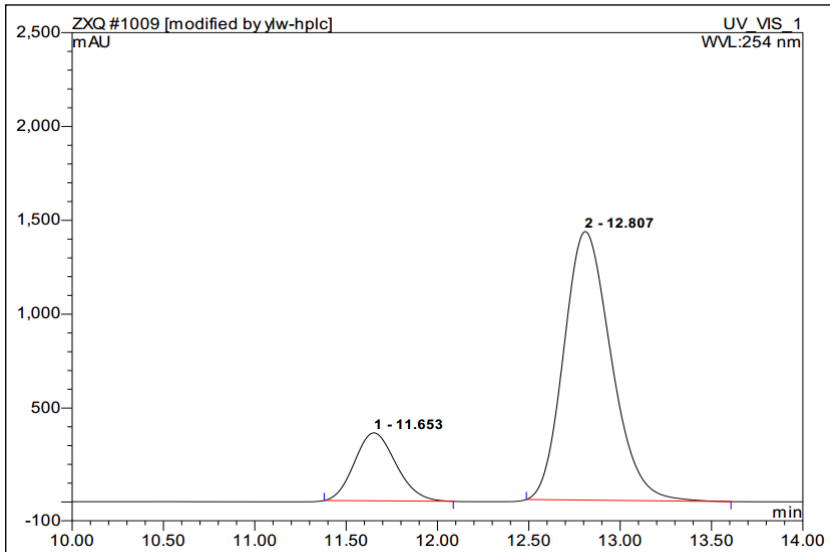

| No.           | Ret.Time min | Peak Name | Height mAU      | Area mAU*min   | Rel.Area %    | Amount n.a.  | Type |
|---------------|--------------|-----------|-----------------|----------------|---------------|--------------|------|
| 1             | 11.65        | n.a.      | 361.887         | 95.392         | 18.15         | n.a.         | BMB* |
| 2             | 12.81        | n.a.      | 1430.263        | 430.212        | 81.85         | n.a.         | BMB* |
| <b>Total:</b> |              |           | <b>1792.150</b> | <b>525.604</b> | <b>100.00</b> | <b>0.000</b> |      |

2v: IC, *n*-hexane/2-propanol = 90/10,  $v = 1.0 \text{ mL min}^{-1}$ ,  $\lambda = 254 \text{ nm}$

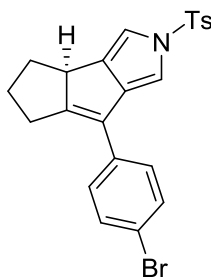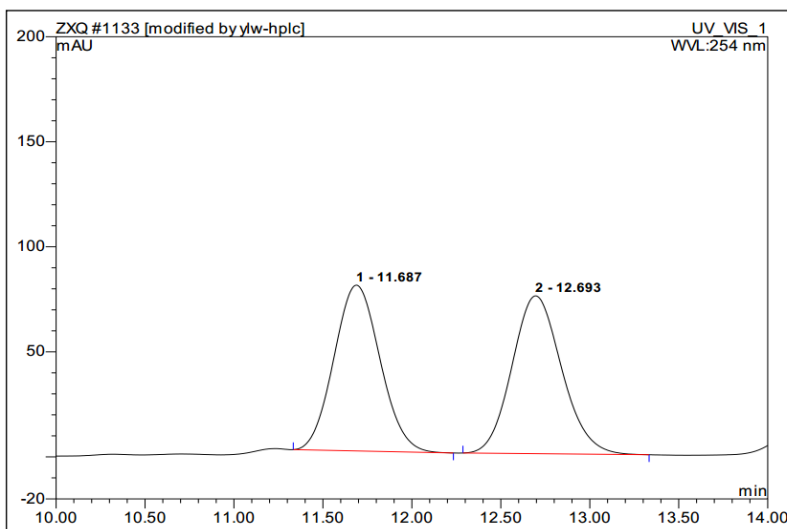

| No.           | Ret.Time<br>min | Peak Name | Height<br>mAU | Area<br>mAU*min | Rel.Area<br>% | Amount<br>n.a. | Type |
|---------------|-----------------|-----------|---------------|-----------------|---------------|----------------|------|
| 1             | 11.69           | n.a.      | 78.918        | 23.701          | 49.36         | n.a.           | BMB* |
| 2             | 12.69           | n.a.      | 75.121        | 24.316          | 50.64         | n.a.           | BMB* |
| <b>Total:</b> |                 |           | 154.039       | 48.017          | 100.00        | 0.000          |      |

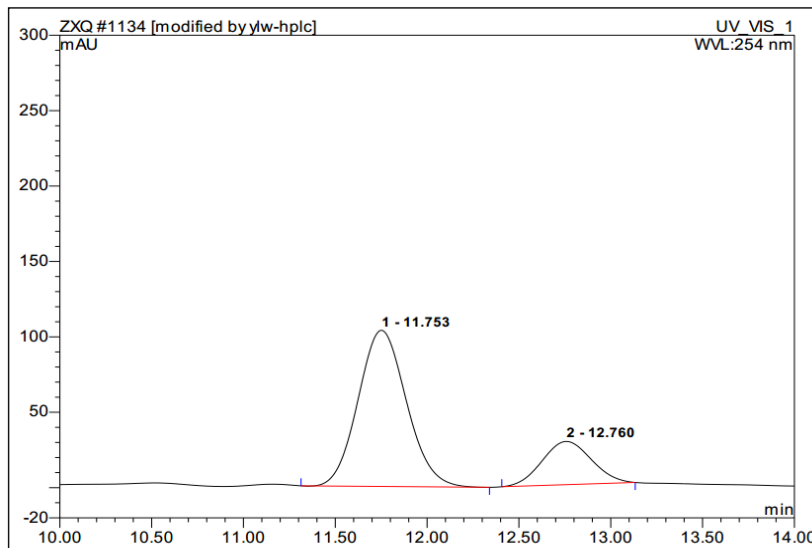

| No.           | Ret.Time<br>min | Peak Name | Height<br>mAU | Area<br>mAU*min | Rel.Area<br>% | Amount<br>n.a. | Type |
|---------------|-----------------|-----------|---------------|-----------------|---------------|----------------|------|
| 1             | 11.75           | n.a.      | 103.540       | 31.580          | 77.99         | n.a.           | BMB* |
| 2             | 12.76           | n.a.      | 28.643        | 8.912           | 22.01         | n.a.           | BMB* |
| <b>Total:</b> |                 |           | 132.183       | 40.492          | 100.00        | 0.000          |      |

2w: ASH, *n*-hexane/2-propanol = 85/15,  $v = 1.0 \text{ mL min}^{-1}$ ,  $\lambda = 254 \text{ nm}$

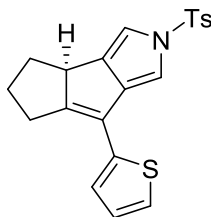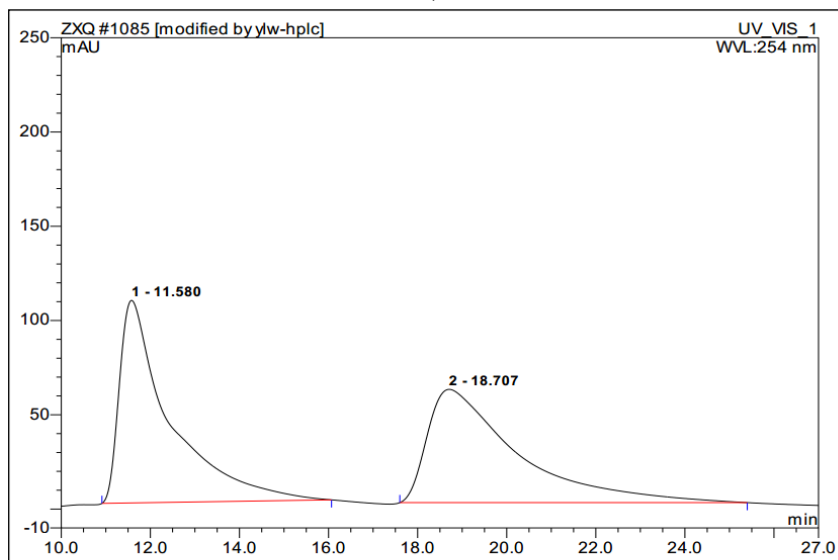

| No.           | Ret.Time min | Peak Name | Height mAU | Area mAU*min | Rel.Area % | Amount n.a. | Type |
|---------------|--------------|-----------|------------|--------------|------------|-------------|------|
| 1             | 11.58        | n.a.      | 107.410    | 140.577      | 50.32      | n.a.        | BMB* |
| 2             | 18.71        | n.a.      | 60.069     | 138.779      | 49.68      | n.a.        | BMB* |
| <b>Total:</b> |              |           | 167.479    | 279.356      | 100.00     | 0.000       |      |

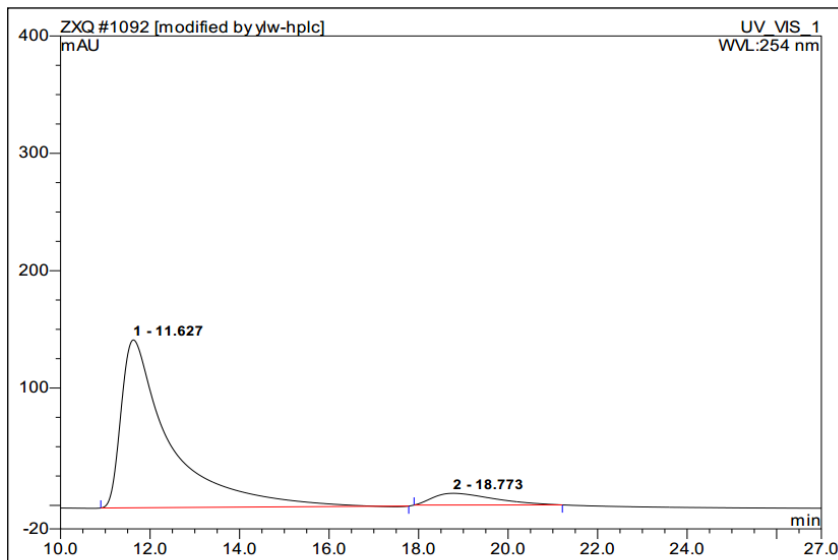

| No.           | Ret.Time min | Peak Name | Height mAU | Area mAU*min | Rel.Area % | Amount n.a. | Type |
|---------------|--------------|-----------|------------|--------------|------------|-------------|------|
| 1             | 11.63        | n.a.      | 143.051    | 181.003      | 91.99      | n.a.        | BMB* |
| 2             | 18.77        | n.a.      | 9.979      | 15.759       | 8.01       | n.a.        | BMB* |
| <b>Total:</b> |              |           | 153.029    | 196.762      | 100.00     | 0.000       |      |

2x: ASH, *n*-hexane/2-propanol = 85/15,  $v = 1.0 \text{ mL min}^{-1}$ ,  $\lambda = 254 \text{ nm}$

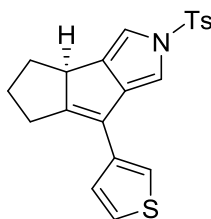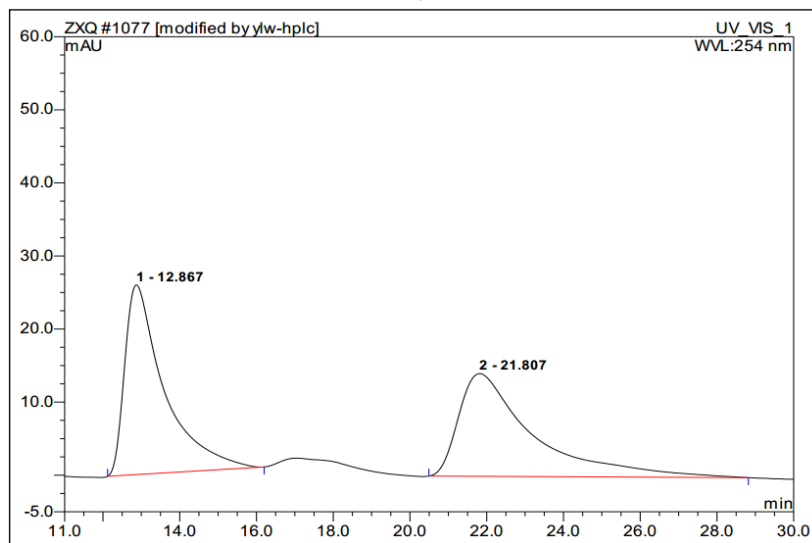

| No.           | Ret.Time<br>min | Peak Name | Height<br>mAU | Area<br>mAU*min | Rel.Area<br>% | Amount<br>n.a. | Type |
|---------------|-----------------|-----------|---------------|-----------------|---------------|----------------|------|
| 1             | 12.87           | n.a.      | 25.942        | 30.873          | 49.74         | n.a.           | BMB* |
| 2             | 21.81           | n.a.      | 14.052        | 31.193          | 50.26         | n.a.           | BMB* |
| <b>Total:</b> |                 |           | 39.994        | 62.066          | 100.00        | 0.000          |      |

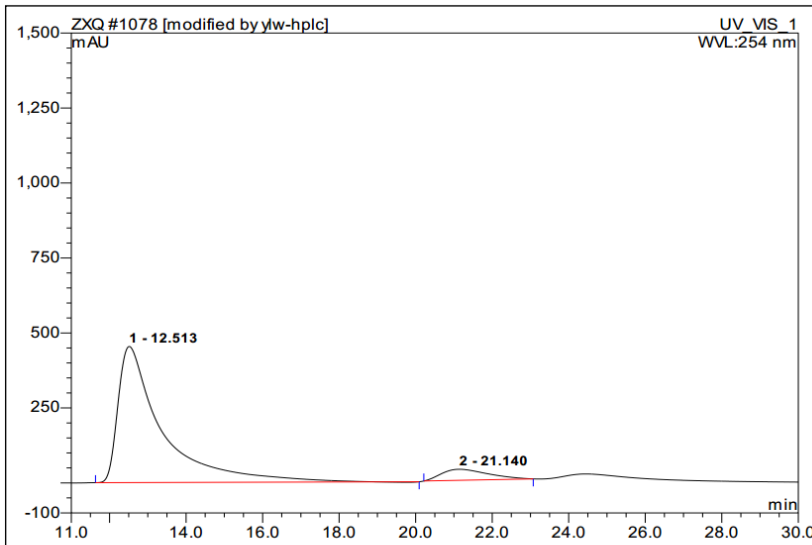

| No.           | Ret.Time<br>min | Peak Name | Height<br>mAU | Area<br>mAU*min | Rel.Area<br>% | Amount<br>n.a. | Type |
|---------------|-----------------|-----------|---------------|-----------------|---------------|----------------|------|
| 1             | 12.51           | n.a.      | 453.705       | 604.053         | 92.13         | n.a.           | BMB* |
| 2             | 21.14           | n.a.      | 36.789        | 51.627          | 7.87          | n.a.           | BMB* |
| <b>Total:</b> |                 |           | 490.494       | 655.680         | 100.00        | 0.000          |      |

2y: ADH, *n*-hexane/2-propanol = 70/30,  $v = 1.0 \text{ mL min}^{-1}$ ,  $\lambda = 254 \text{ nm}$

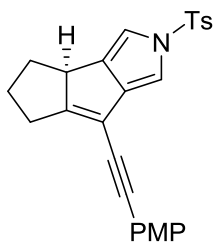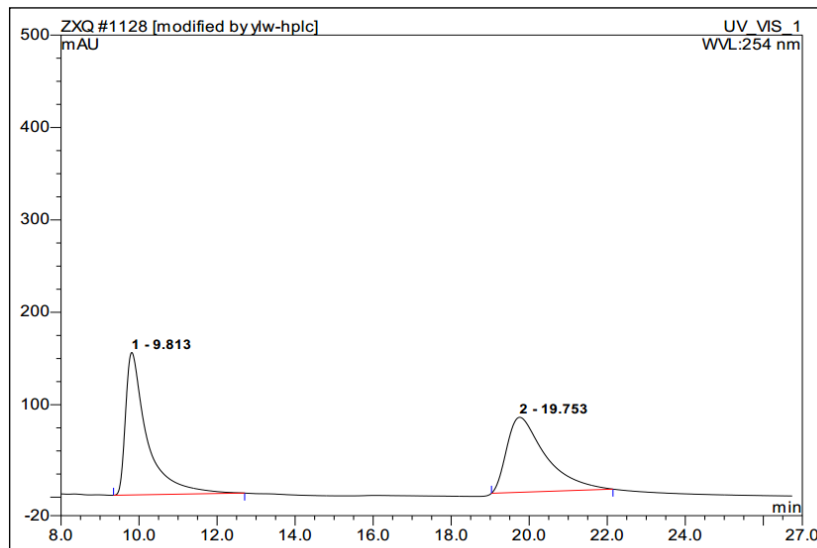

| No.           | Ret.Time<br>min | Peak Name | Height<br>mAU | Area<br>mAU*min | Rel.Area<br>% | Amount<br>n.a. | Type |
|---------------|-----------------|-----------|---------------|-----------------|---------------|----------------|------|
| 1             | 9.81            | n.a.      | 154.146       | 98.126          | 51.23         | n.a.           | BMB* |
| 2             | 19.75           | n.a.      | 81.175        | 93.417          | 48.77         | n.a.           | BMB* |
| <b>Total:</b> |                 |           | 235.321       | 191.543         | 100.00        | 0.000          |      |

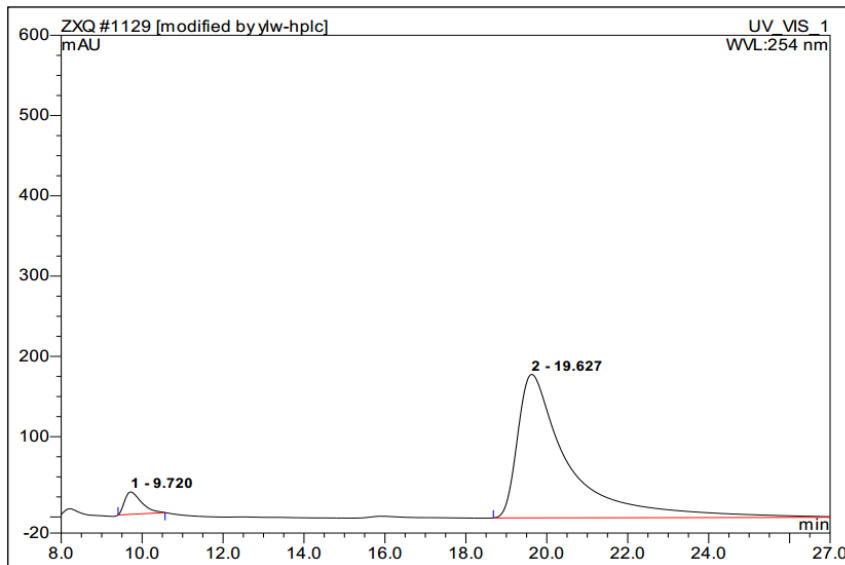

| No.           | Ret.Time<br>min | Peak Name | Height<br>mAU | Area<br>mAU*min | Rel.Area<br>% | Amount<br>n.a. | Type |
|---------------|-----------------|-----------|---------------|-----------------|---------------|----------------|------|
| 1             | 9.72            | n.a.      | 27.877        | 13.464          | 4.90          | n.a.           | BMB* |
| 2             | 19.63           | n.a.      | 178.713       | 261.385         | 95.10         | n.a.           | BMB* |
| <b>Total:</b> |                 |           | 206.591       | 274.848         | 100.00        | 0.000          |      |

2z: IC, *n*-hexane/2-propanol = 80/20,  $v = 1.0 \text{ mL min}^{-1}$ ,  $\lambda = 254 \text{ nm}$

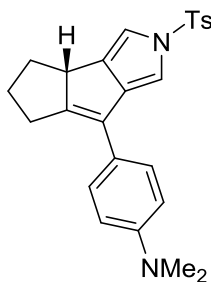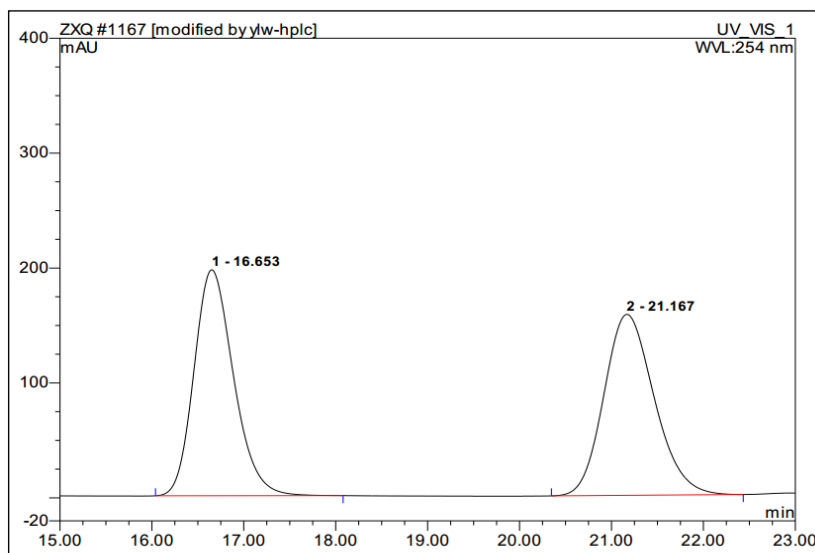

| No.           | Ret.Time<br>min | Peak Name | Height<br>mAU | Area<br>mAU*min | Rel.Area<br>% | Amount<br>n.a. | Type |
|---------------|-----------------|-----------|---------------|-----------------|---------------|----------------|------|
| 1             | 16.65           | n.a.      | 196.581       | 97.908          | 49.48         | n.a.           | BMB* |
| 2             | 21.17           | n.a.      | 157.504       | 99.951          | 50.52         | n.a.           | BMB* |
| <b>Total:</b> |                 |           | 354.085       | 197.859         | 100.00        | 0.000          |      |

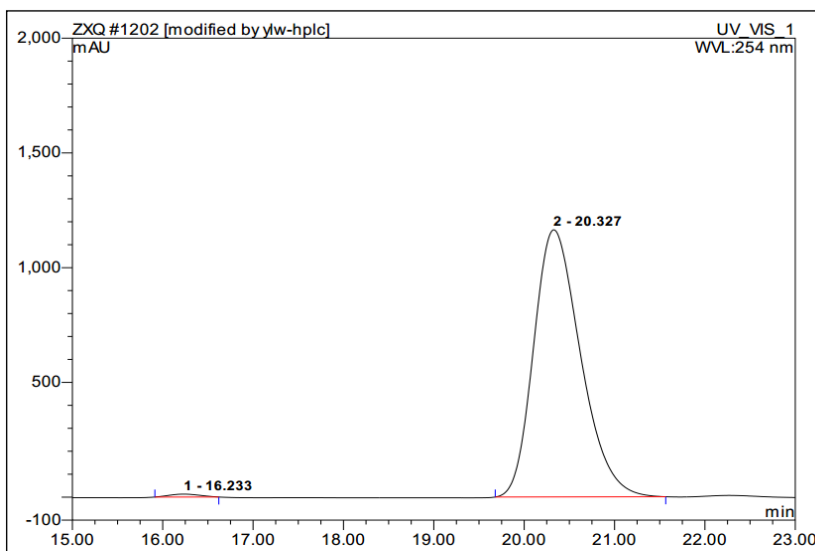

| No.           | Ret.Time<br>min | Peak Name | Height<br>mAU | Area<br>mAU*min | Rel.Area<br>% | Amount<br>n.a. | Type |
|---------------|-----------------|-----------|---------------|-----------------|---------------|----------------|------|
| 1             | 16.23           | n.a.      | 12.570        | 4.879           | 0.69          | n.a.           | BMB* |
| 2             | 20.33           | n.a.      | 1163.953      | 699.593         | 99.31         | n.a.           | BMB* |
| <b>Total:</b> |                 |           | 1176.523      | 704.472         | 100.00        | 0.000          |      |



**2aa:** ADH, *n*-hexane/2-propanol = 60/40,  $v = 1.0 \text{ mL min}^{-1}$ ,  $\lambda = 254 \text{ nm}$

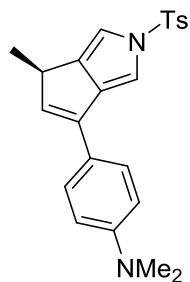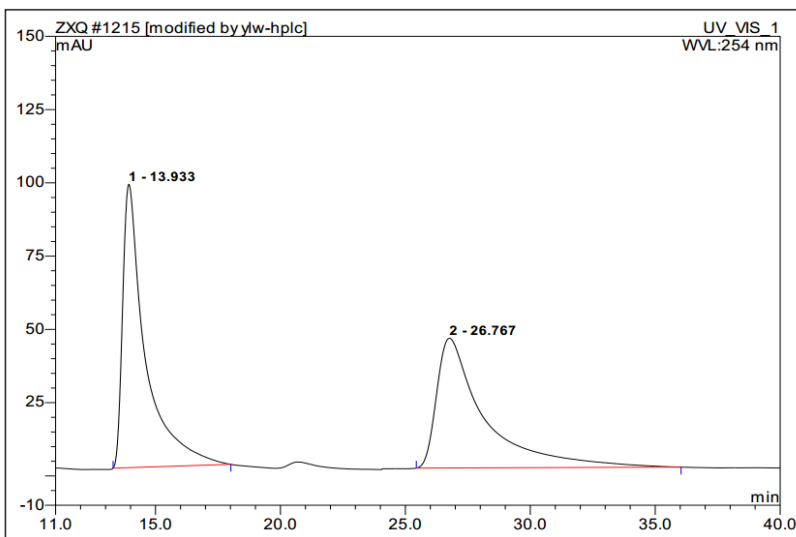

| No.           | Ret.Time<br>min | Peak Name | Height<br>mAU | Area<br>mAU*min | Rel.Area<br>% | Amount<br>n.a. | Type |
|---------------|-----------------|-----------|---------------|-----------------|---------------|----------------|------|
| 1             | 13.93           | n.a.      | 96.689        | 101.581         | 50.89         | n.a.           | BMB* |
| 2             | 26.77           | n.a.      | 44.268        | 98.046          | 49.11         | n.a.           | BMB* |
| <b>Total:</b> |                 |           | 140.957       | 199.628         | 100.00        | 0.000          |      |

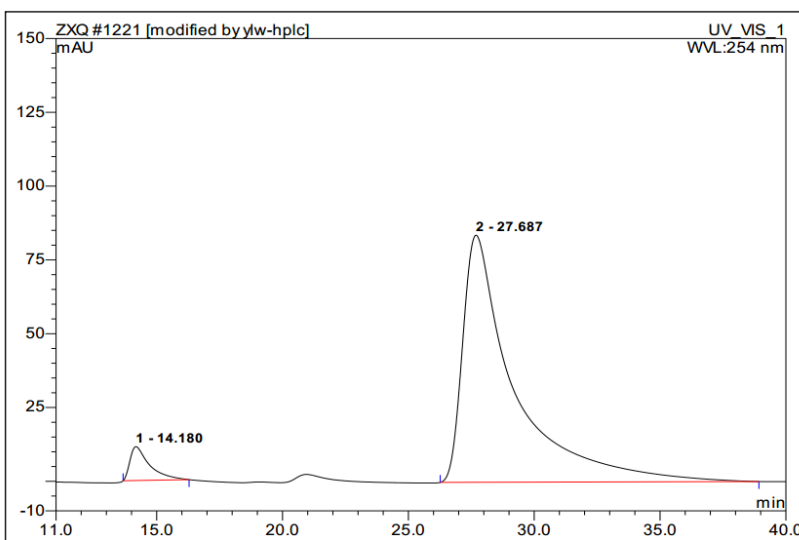

| No.           | Ret.Time<br>min | Peak Name | Height<br>mAU | Area<br>mAU*min | Rel.Area<br>% | Amount<br>n.a. | Type |
|---------------|-----------------|-----------|---------------|-----------------|---------------|----------------|------|
| 1             | 14.18           | n.a.      | 11.465        | 10.320          | 4.95          | n.a.           | BMB* |
| 2             | 27.69           | n.a.      | 83.722        | 198.068         | 95.05         | n.a.           | BMB* |
| <b>Total:</b> |                 |           | 95.187        | 208.388         | 100.00        | 0.000          |      |

**2ab:** ODH, *n*-hexane/2-propanol = 70/30,  $v = 1.0 \text{ mL min}^{-1}$ ,  $\lambda = 254 \text{ nm}$

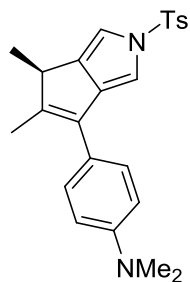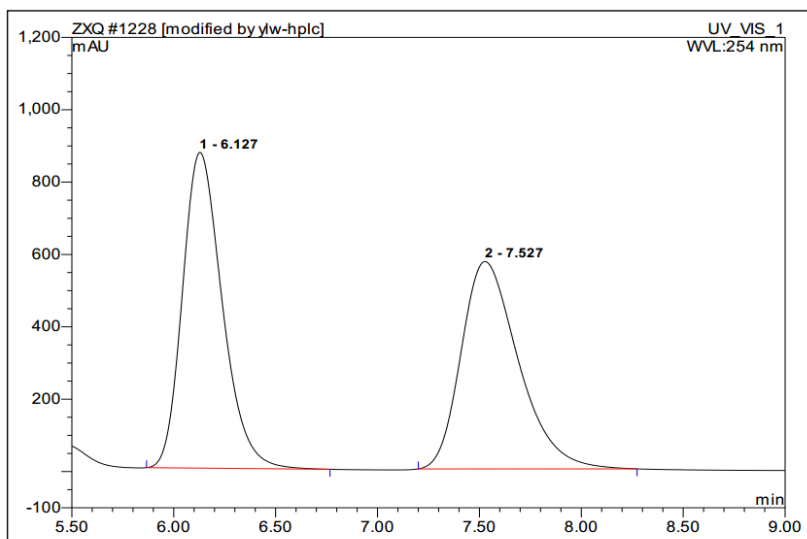

| No.           | Ret.Time<br>min | Peak Name | Height<br>mAU | Area<br>mAU*min | Rel.Area<br>% | Amount<br>n.a. | Type |
|---------------|-----------------|-----------|---------------|-----------------|---------------|----------------|------|
| 1             | 6.13            | n.a.      | 872.811       | 197.332         | 51.37         | n.a.           | BMB* |
| 2             | 7.53            | n.a.      | 573.107       | 186.821         | 48.63         | n.a.           | BMB* |
| <b>Total:</b> |                 |           | 1445.918      | 384.153         | 100.00        | 0.000          |      |

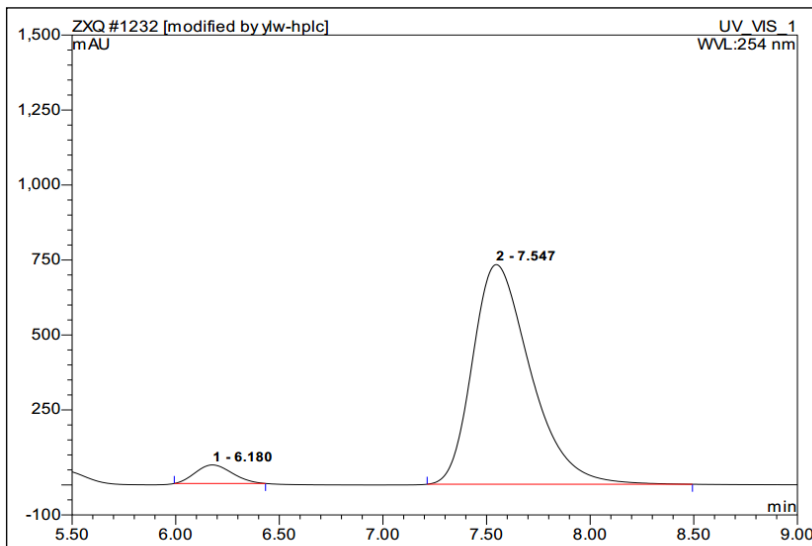

| No.           | Ret.Time<br>min | Peak Name | Height<br>mAU | Area<br>mAU*min | Rel.Area<br>% | Amount<br>n.a. | Type |
|---------------|-----------------|-----------|---------------|-----------------|---------------|----------------|------|
| 1             | 6.18            | n.a.      | 61.808        | 12.719          | 5.07          | n.a.           | BMB* |
| 2             | 7.55            | n.a.      | 732.558       | 237.928         | 94.93         | n.a.           | BMB* |
| <b>Total:</b> |                 |           | 794.365       | 250.647         | 100.00        | 0.000          |      |

**2ac:** ADH, *n*-hexane/2-propanol = 70/30,  $v = 1.0 \text{ mL min}^{-1}$ ,  $\lambda = 254 \text{ nm}$

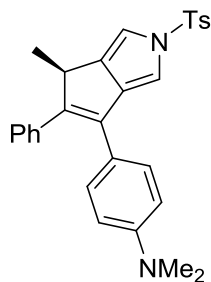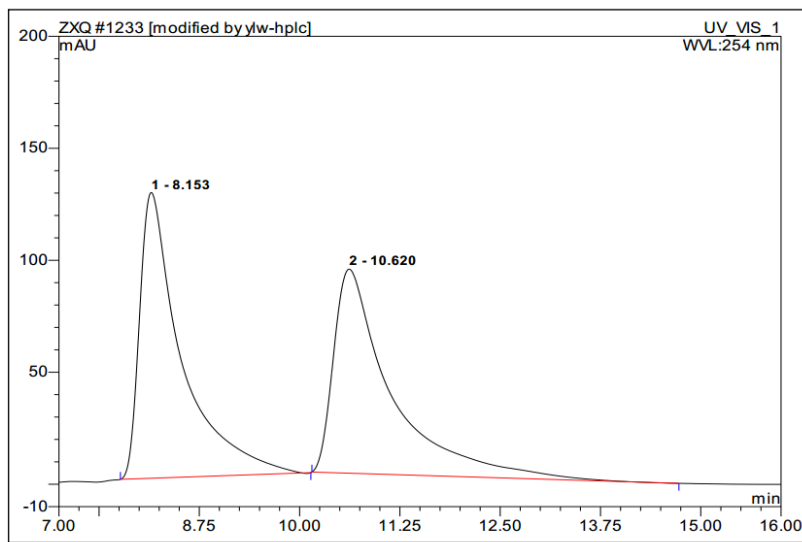

| No.           | Ret.Time<br>min | Peak Name | Height<br>mAU | Area<br>mAU*min | Rel.Area<br>% | Amount<br>n.a. | Type |
|---------------|-----------------|-----------|---------------|-----------------|---------------|----------------|------|
| 1             | 8.15            | n.a.      | 127.565       | 76.852          | 50.45         | n.a.           | BMB* |
| 2             | 10.62           | n.a.      | 91.103        | 75.473          | 49.55         | n.a.           | BMB* |
| <b>Total:</b> |                 |           | 218.668       | 152.325         | 100.00        | 0.000          |      |

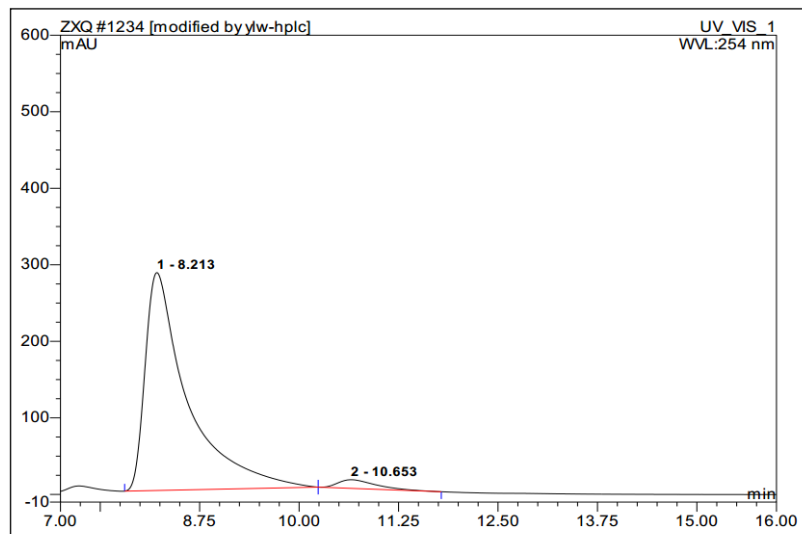

| No.           | Ret.Time<br>min | Peak Name | Height<br>mAU | Area<br>mAU*min | Rel.Area<br>% | Amount<br>n.a. | Type |
|---------------|-----------------|-----------|---------------|-----------------|---------------|----------------|------|
| 1             | 8.21            | n.a.      | 284.655       | 175.764         | 96.55         | n.a.           | BMB* |
| 2             | 10.65           | n.a.      | 11.274        | 6.272           | 3.45          | n.a.           | bMB* |
| <b>Total:</b> |                 |           | 295.929       | 182.036         | 100.00        | 0.000          |      |

2ad: ODH, *n*-hexane/2-propanol = 70/30,  $v = 1.0 \text{ mL min}^{-1}$ ,  $\lambda = 254 \text{ nm}$

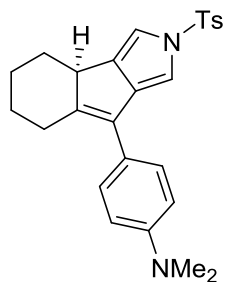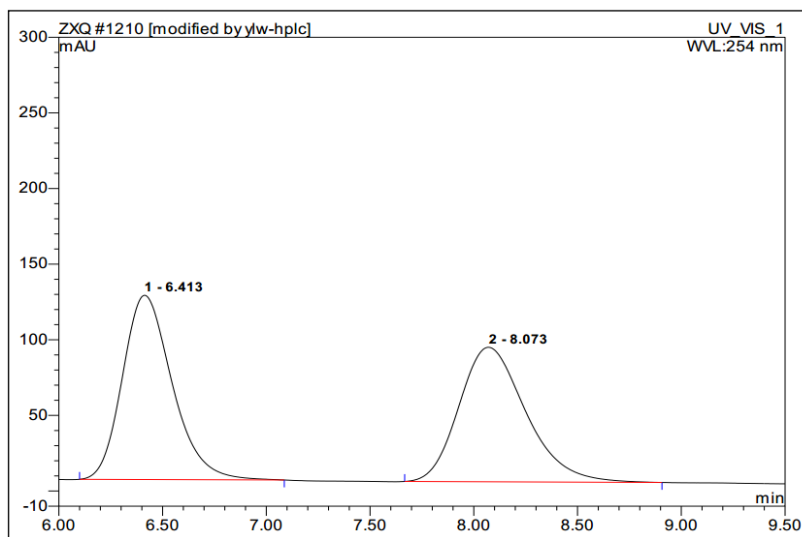

| No.           | Ret.Time min | Peak Name | Height mAU     | Area mAU*min  | Rel.Area %    | Amount n.a.  | Type |
|---------------|--------------|-----------|----------------|---------------|---------------|--------------|------|
| 1             | 6.41         | n.a.      | 121.824        | 33.883        | 50.51         | n.a.         | BMB* |
| 2             | 8.07         | n.a.      | 88.915         | 33.198        | 49.49         | n.a.         | BMB* |
| <b>Total:</b> |              |           | <b>210.739</b> | <b>67.081</b> | <b>100.00</b> | <b>0.000</b> |      |

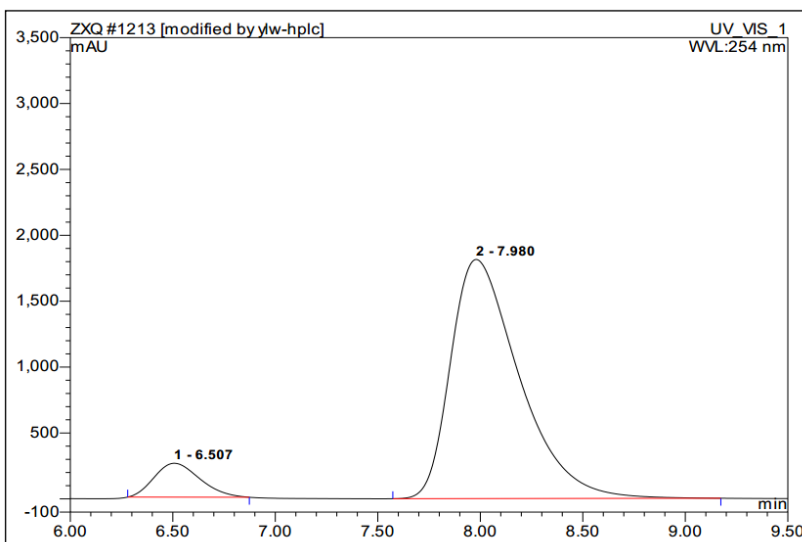

| No.           | Ret.Time min | Peak Name | Height mAU      | Area mAU*min   | Rel.Area %    | Amount n.a.  | Type |
|---------------|--------------|-----------|-----------------|----------------|---------------|--------------|------|
| 1             | 6.51         | n.a.      | 257.274         | 66.278         | 8.60          | n.a.         | BMB* |
| 2             | 7.98         | n.a.      | 1814.616        | 704.338        | 91.40         | n.a.         | BMB* |
| <b>Total:</b> |              |           | <b>2071.891</b> | <b>770.616</b> | <b>100.00</b> | <b>0.000</b> |      |

**2ae**: ADH, *n*-hexane/2-propanol = 70/30,  $v = 1.0 \text{ mL min}^{-1}$ ,  $\lambda = 254 \text{ nm}$

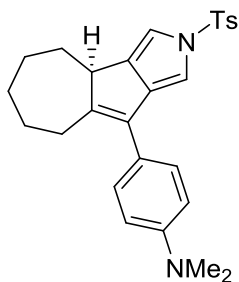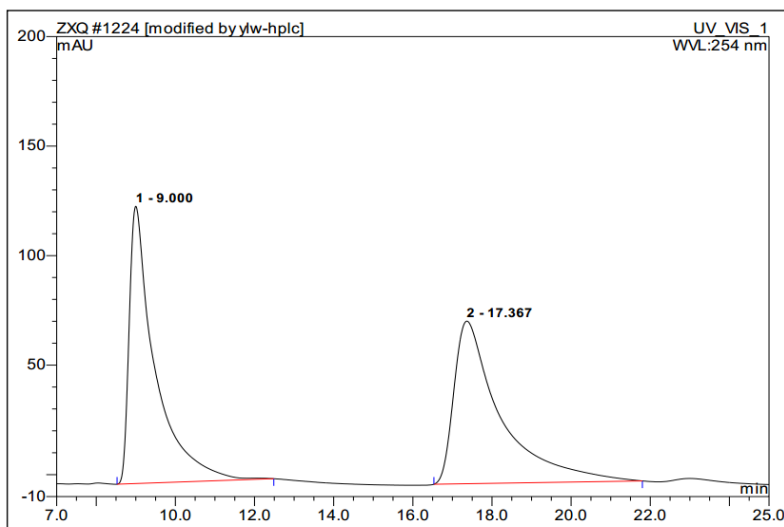

| No.           | Ret.Time<br>min | Peak Name | Height<br>mAU | Area<br>mAU*min | Rel.Area<br>% | Amount<br>n.a. | Type |
|---------------|-----------------|-----------|---------------|-----------------|---------------|----------------|------|
| 1             | 9.00            | n.a.      | 126.585       | 95.483          | 48.55         | n.a.           | BMB* |
| 2             | 17.37           | n.a.      | 74.224        | 101.172         | 51.45         | n.a.           | BMB* |
| <b>Total:</b> |                 |           | 200.809       | 196.654         | 100.00        | 0.000          |      |

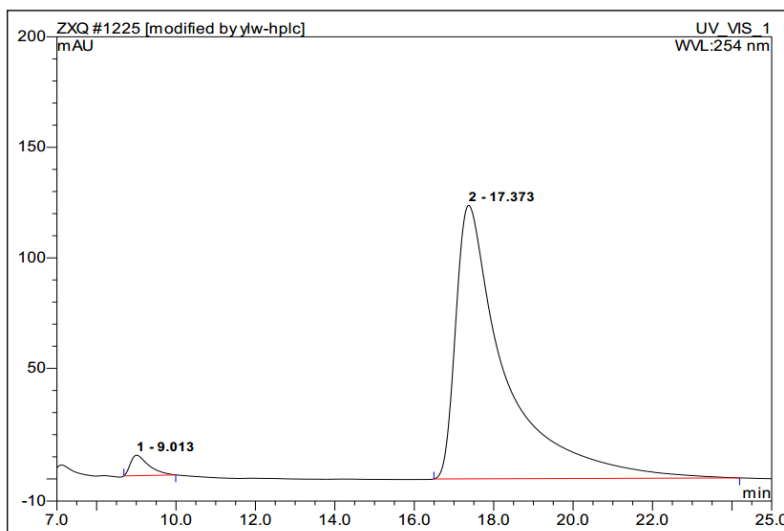

| No.           | Ret.Time<br>min | Peak Name | Height<br>mAU | Area<br>mAU*min | Rel.Area<br>% | Amount<br>n.a. | Type |
|---------------|-----------------|-----------|---------------|-----------------|---------------|----------------|------|
| 1             | 9.01            | n.a.      | 9.239         | 4.930           | 2.69          | n.a.           | BMB* |
| 2             | 17.37           | n.a.      | 123.727       | 178.626         | 97.31         | n.a.           | BMB* |
| <b>Total:</b> |                 |           | 132.966       | 183.556         | 100.00        | 0.000          |      |

**2af:** ADH, *n*-hexane/2-propanol = 80/20,  $v = 1.0 \text{ mL min}^{-1}$ ,  $\lambda = 254 \text{ nm}$

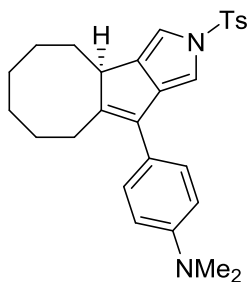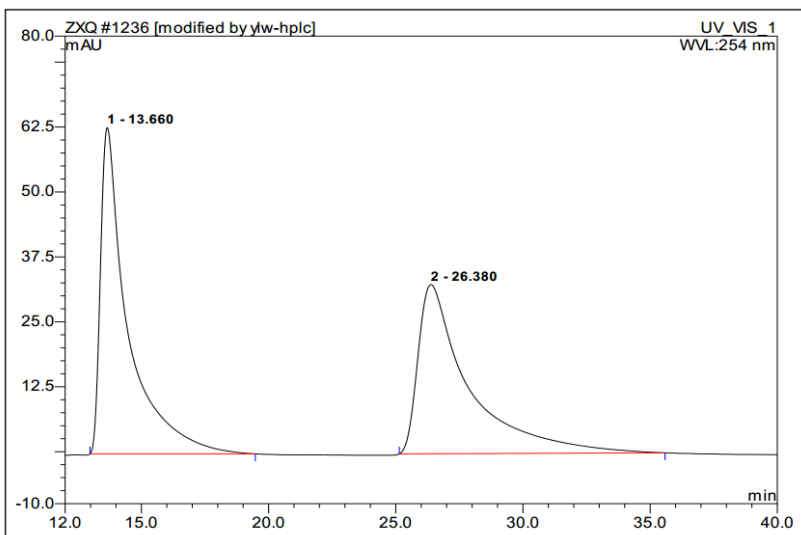

| No.           | Ret.Time<br>min | Peak Name | Height<br>mAU | Area<br>mAU*min | Rel.Area<br>% | Amount<br>n.a. | Type |
|---------------|-----------------|-----------|---------------|-----------------|---------------|----------------|------|
| 1             | 13.66           | n.a.      | 62.809        | 77.758          | 50.82         | n.a.           | BMB* |
| 2             | 26.38           | n.a.      | 32.565        | 75.245          | 49.18         | n.a.           | BMB* |
| <b>Total:</b> |                 |           | 95.375        | 153.003         | 100.00        | 0.000          |      |

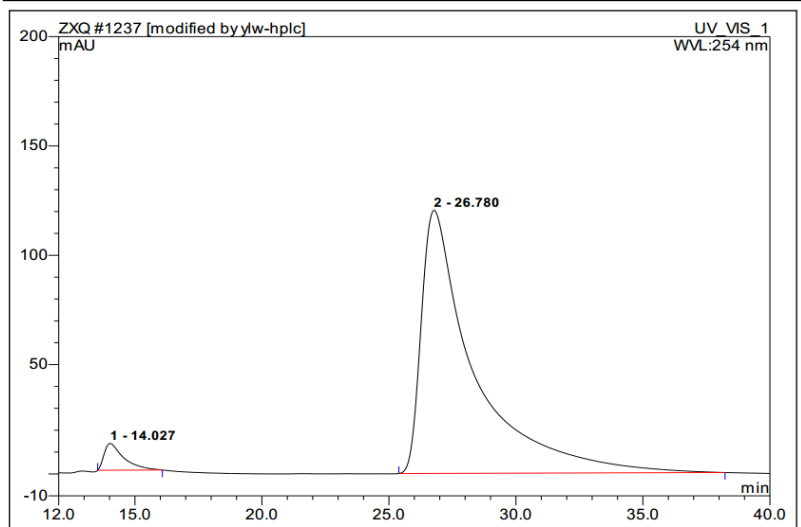

| No.           | Ret.Time<br>min | Peak Name | Height<br>mAU | Area<br>mAU*min | Rel.Area<br>% | Amount<br>n.a. | Type |
|---------------|-----------------|-----------|---------------|-----------------|---------------|----------------|------|
| 1             | 14.03           | n.a.      | 12.233        | 10.939          | 3.64          | n.a.           | BMB* |
| 2             | 26.78           | n.a.      | 120.336       | 289.943         | 96.36         | n.a.           | BMB* |
| <b>Total:</b> |                 |           | 132.569       | 300.882         | 100.00        | 0.000          |      |

**2ag**: IC, *n*-hexane/2-propanol = 80/20,  $v = 1.0 \text{ mL min}^{-1}$ ,  $\lambda = 254 \text{ nm}$

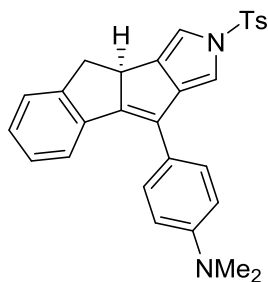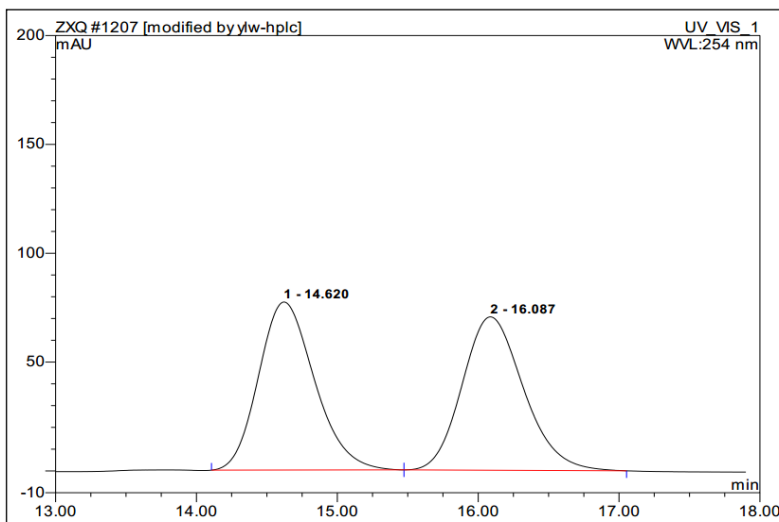

| No.           | Ret.Time<br>min | Peak Name | Height<br>mAU | Area<br>mAU*min | Rel.Area<br>% | Amount<br>n.a. | Type |
|---------------|-----------------|-----------|---------------|-----------------|---------------|----------------|------|
| 1             | 14.62           | n.a.      | 77.171        | 35.528          | 49.99         | n.a.           | BMB* |
| 2             | 16.09           | n.a.      | 70.456        | 35.537          | 50.01         | n.a.           | bMB* |
| <b>Total:</b> |                 |           | 147.627       | 71.065          | 100.00        | 0.000          |      |

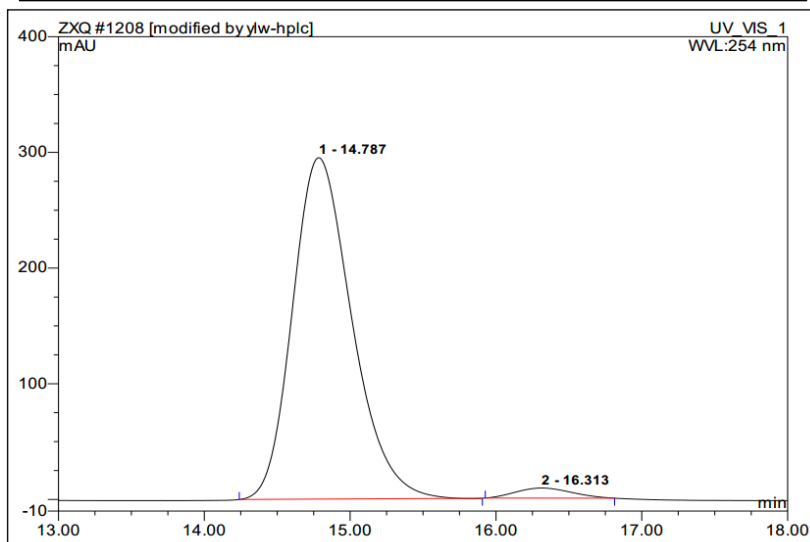

| No.           | Ret.Time<br>min | Peak Name | Height<br>mAU | Area<br>mAU*min | Rel.Area<br>% | Amount<br>n.a. | Type |
|---------------|-----------------|-----------|---------------|-----------------|---------------|----------------|------|
| 1             | 14.79           | n.a.      | 295.110       | 138.853         | 97.30         | n.a.           | BMB* |
| 2             | 16.31           | n.a.      | 8.714         | 3.852           | 2.70          | n.a.           | BMB* |
| <b>Total:</b> |                 |           | 303.824       | 142.705         | 100.00        | 0.000          |      |

**2ah**: IC, *n*-hexane/2-propanol = 80/20,  $v = 1.0 \text{ mL min}^{-1}$ ,  $\lambda = 254 \text{ nm}$

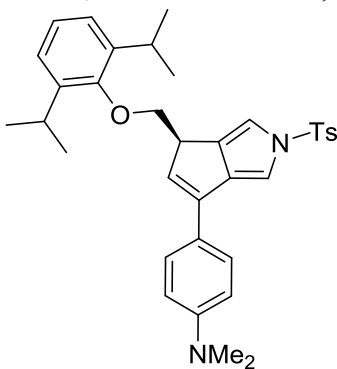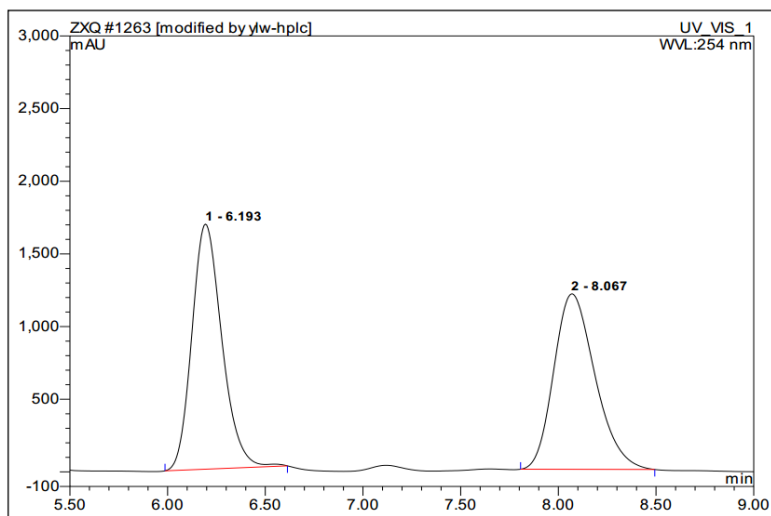

| No.           | Ret.Time<br>min | Peak Name | Height<br>mAU | Area<br>mAU*min | Rel.Area<br>% | Amount<br>n.a. | Type |
|---------------|-----------------|-----------|---------------|-----------------|---------------|----------------|------|
| 1             | 6.19            | n.a.      | 1686.820      | 300.387         | 50.38         | n.a.           | BMB* |
| 2             | 8.07            | n.a.      | 1207.037      | 295.909         | 49.62         | n.a.           | BMB* |
| <b>Total:</b> |                 |           | 2893.857      | 596.296         | 100.00        | 0.000          |      |

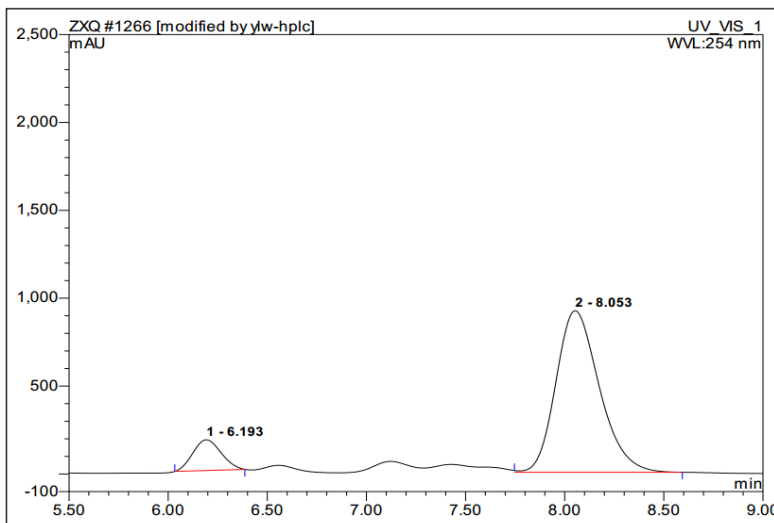

| No.           | Ret.Time<br>min | Peak Name | Height<br>mAU | Area<br>mAU*min | Rel.Area<br>% | Amount<br>n.a. | Type |
|---------------|-----------------|-----------|---------------|-----------------|---------------|----------------|------|
| 1             | 6.19            | n.a.      | 174.542       | 28.813          | 10.99         | n.a.           | BMB* |
| 2             | 8.05            | n.a.      | 919.355       | 233.249         | 89.01         | n.a.           | MB*  |
| <b>Total:</b> |                 |           | 1093.897      | 262.062         | 100.00        | 0.000          |      |



2ai: IC, *n*-hexane/2-propanol = 50/50,  $v = 1.5 \text{ mL min}^{-1}$ ,  $\lambda = 254 \text{ nm}$

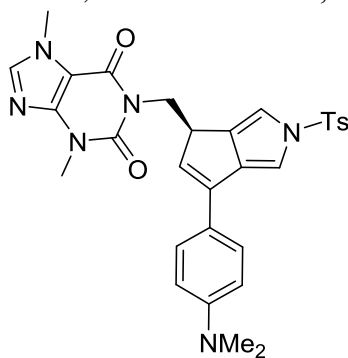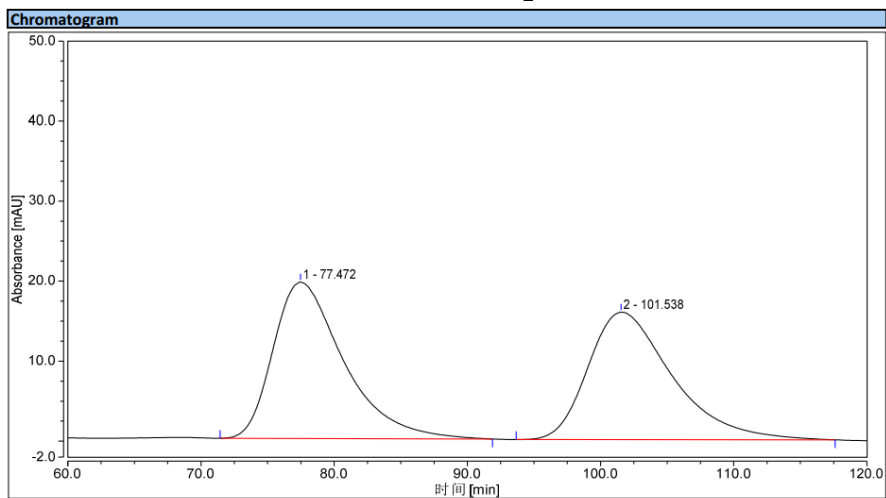

**Integration Results**

| No.           | Peak Name | Retention Time<br>min | Area<br>mAU*min | Height<br>mAU | Relative Area<br>% | Relative Height<br>% | Amount<br>n.a. |
|---------------|-----------|-----------------------|-----------------|---------------|--------------------|----------------------|----------------|
| 1             |           | 77.472                | 120.126         | 19.572        | 50.77              | 55.10                | n.a.           |
| 2             |           | 101.538               | 116.498         | 15.946        | 49.23              | 44.90                | n.a.           |
| <b>Total:</b> |           |                       | <b>236.624</b>  | <b>35.517</b> | <b>100.00</b>      | <b>100.00</b>        |                |

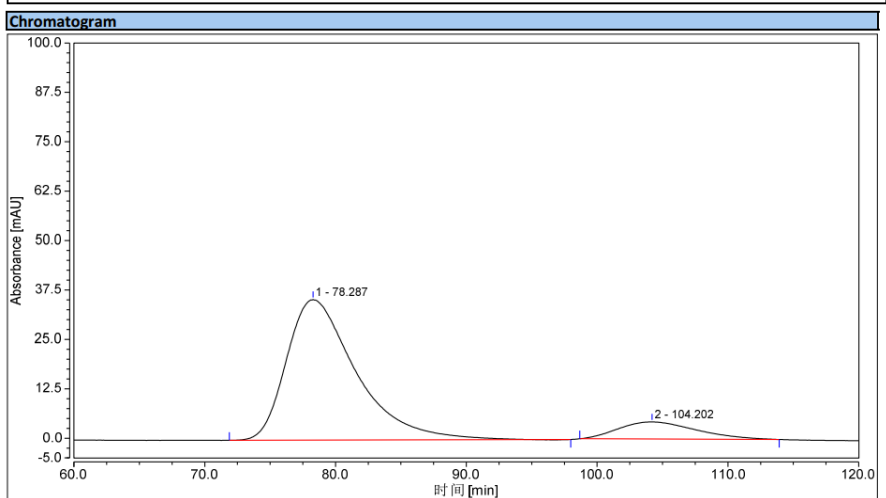

**Integration Results**

| No.           | Peak Name | Retention Time<br>min | Area<br>mAU*min | Height<br>mAU | Relative Area<br>% | Relative Height<br>% | Amount<br>n.a. |
|---------------|-----------|-----------------------|-----------------|---------------|--------------------|----------------------|----------------|
| 1             |           | 78.287                | 218.884         | 35.579        | 88.03              | 89.14                | n.a.           |
| 2             |           | 104.202               | 29.774          | 4.334         | 11.97              | 10.86                | n.a.           |
| <b>Total:</b> |           |                       | <b>248.659</b>  | <b>39.913</b> | <b>100.00</b>      | <b>100.00</b>        |                |

**3aa:** ADH, *n*-hexane/2-propanol = 85/15,  $v = 1.0 \text{ mL min}^{-1}$ ,  $\lambda = 254 \text{ nm}$

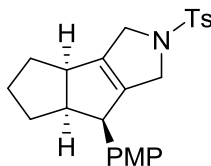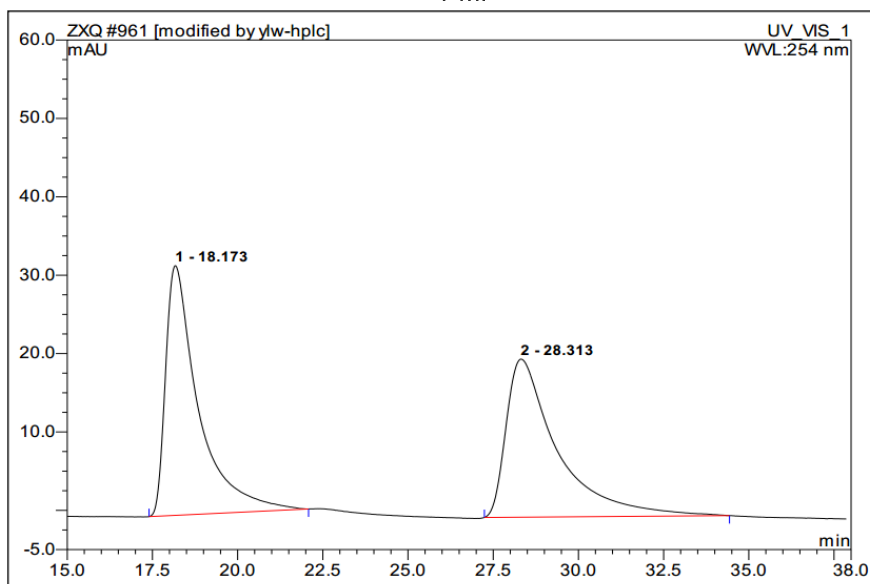

| No.           | Ret.Time<br>min | Peak Name | Height<br>mAU | Area<br>mAU*min | Rel.Area<br>% | Amount<br>n.a. | Type |
|---------------|-----------------|-----------|---------------|-----------------|---------------|----------------|------|
| 1             | 18.17           | n.a.      | 31.850        | 35.527          | 50.37         | n.a.           | BMB* |
| 2             | 28.31           | n.a.      | 20.168        | 35.006          | 49.63         | n.a.           | BMB* |
| <b>Total:</b> |                 |           | 52.018        | 70.533          | 100.00        | 0.000          |      |

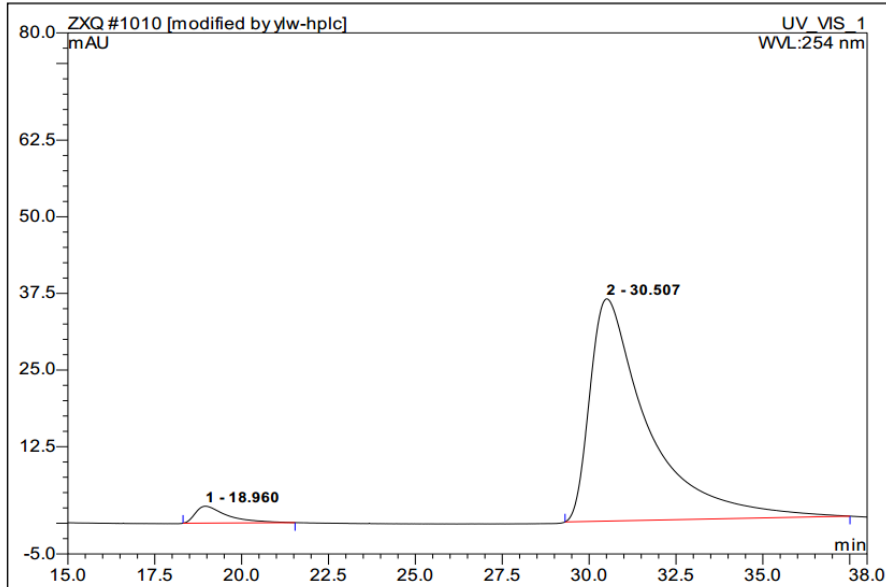

| No.           | Ret.Time<br>min | Peak Name | Height<br>mAU | Area<br>mAU*min | Rel.Area<br>% | Amount<br>n.a. | Type |
|---------------|-----------------|-----------|---------------|-----------------|---------------|----------------|------|
| 1             | 18.96           | n.a.      | 2.754         | 2.929           | 3.98          | n.a.           | BMB* |
| 2             | 30.51           | n.a.      | 36.255        | 70.581          | 96.02         | n.a.           | BMB* |
| <b>Total:</b> |                 |           | 39.008        | 73.509          | 100.00        | 0.000          |      |

3pa: ASH, *n*-hexane/2-propanol = 85/15,  $v = 1.0 \text{ mL min}^{-1}$ ,  $\lambda = 254 \text{ nm}$

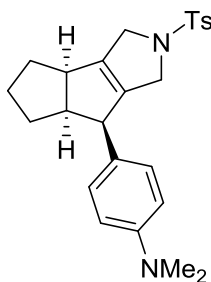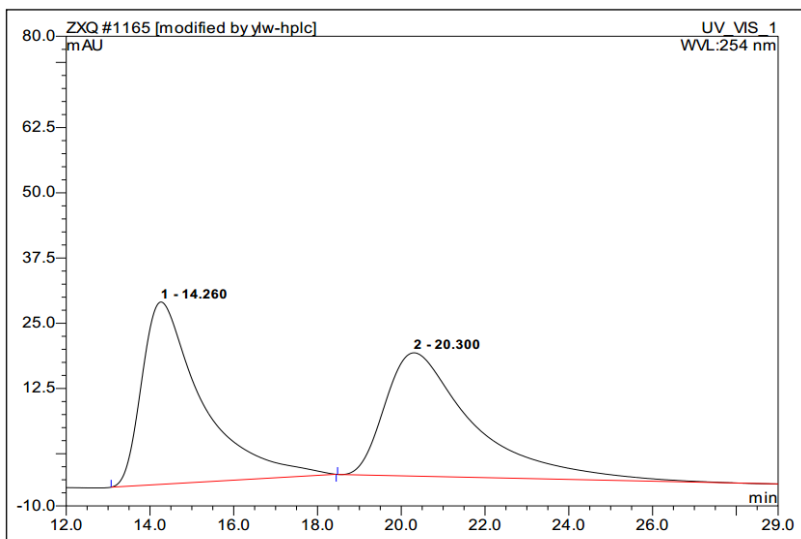

| No.           | Ret.Time min | Peak Name | Height mAU    | Area mAU*min   | Rel.Area %    | Amount n.a.  | Type |
|---------------|--------------|-----------|---------------|----------------|---------------|--------------|------|
| 1             | 14.26        | n.a.      | 34.948        | 58.253         | 50.44         | n.a.         | BMB* |
| 2             | 20.30        | n.a.      | 23.625        | 57.226         | 49.56         | n.a.         | BMB* |
| <b>Total:</b> |              |           | <b>58.573</b> | <b>115.479</b> | <b>100.00</b> | <b>0.000</b> |      |

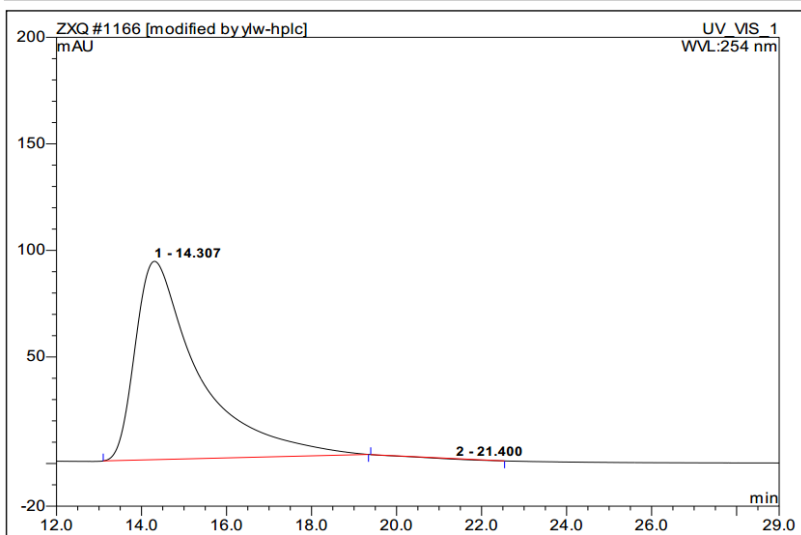

| No.           | Ret.Time min | Peak Name | Height mAU    | Area mAU*min   | Rel.Area %    | Amount n.a.  | Type |
|---------------|--------------|-----------|---------------|----------------|---------------|--------------|------|
| 1             | 14.31        | n.a.      | 93.070        | 161.692        | 99.68         | n.a.         | BMB* |
| 2             | 21.40        | n.a.      | 0.289         | 0.514          | 0.32          | n.a.         | BMB* |
| <b>Total:</b> |              |           | <b>93.359</b> | <b>162.206</b> | <b>100.00</b> | <b>0.000</b> |      |

**3ab**: ASH, *n*-hexane/2-propanol = 70/30,  $v = 1.0 \text{ mL min}^{-1}$ ,  $\lambda = 254 \text{ nm}$

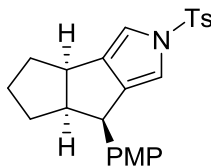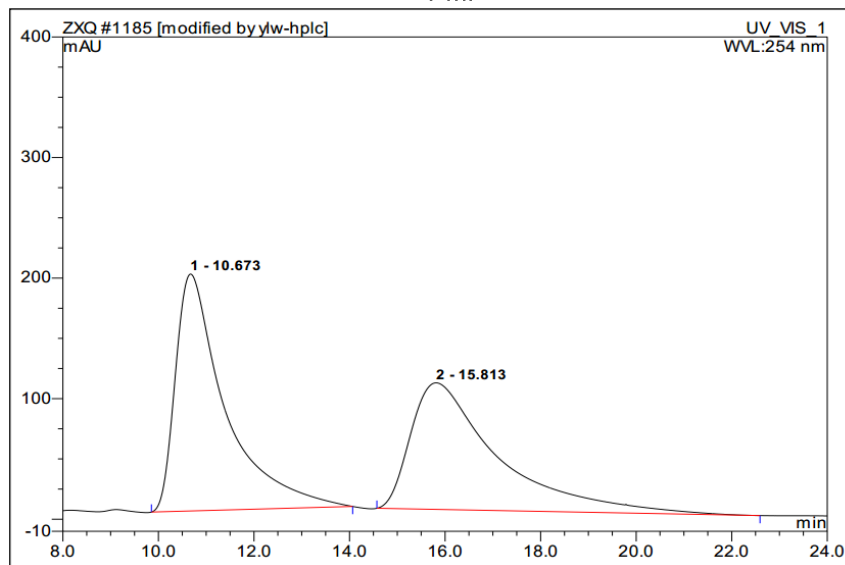

| No.           | Ret.Time<br>min | Peak Name | Height<br>mAU | Area<br>mAU*min | Rel.Area<br>% | Amount<br>n.a. | Type |
|---------------|-----------------|-----------|---------------|-----------------|---------------|----------------|------|
| 1             | 10.67           | n.a.      | 196.502       | 236.457         | 51.83         | n.a.           | BMB* |
| 2             | 15.81           | n.a.      | 104.987       | 219.755         | 48.17         | n.a.           | BMB* |
| <b>Total:</b> |                 |           | 301.490       | 456.212         | 100.00        | 0.000          |      |

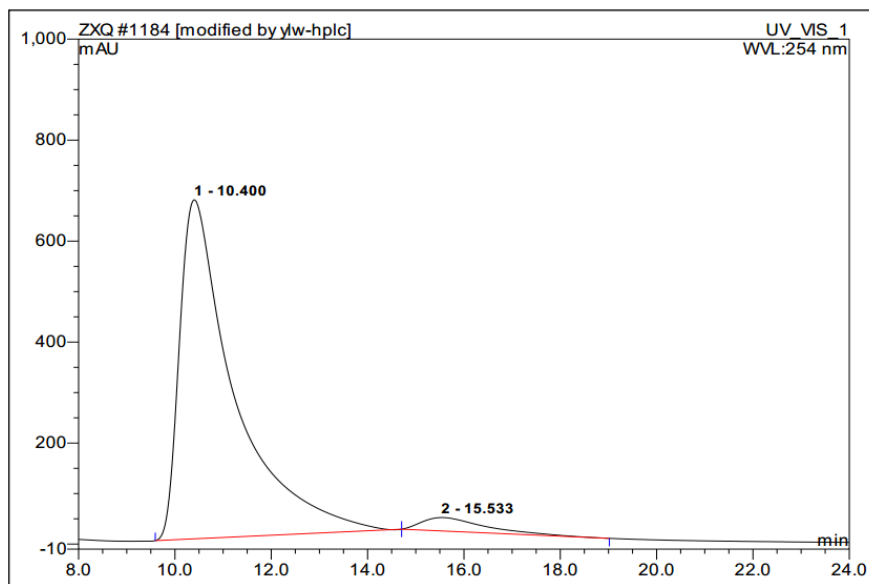

| No.           | Ret.Time<br>min | Peak Name | Height<br>mAU | Area<br>mAU*min | Rel.Area<br>% | Amount<br>n.a. | Type |
|---------------|-----------------|-----------|---------------|-----------------|---------------|----------------|------|
| 1             | 10.40           | n.a.      | 671.279       | 881.395         | 95.57         | n.a.           | BMB* |
| 2             | 15.53           | n.a.      | 26.483        | 40.877          | 4.43          | n.a.           | bMB* |
| <b>Total:</b> |                 |           | 697.762       | 922.272         | 100.00        | 0.000          |      |

**3pb**: IC, *n*-hexane/2-propanol = 80/20,  $v = 1.0 \text{ mL min}^{-1}$ ,  $\lambda = 254 \text{ nm}$

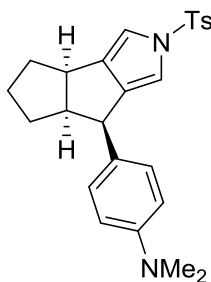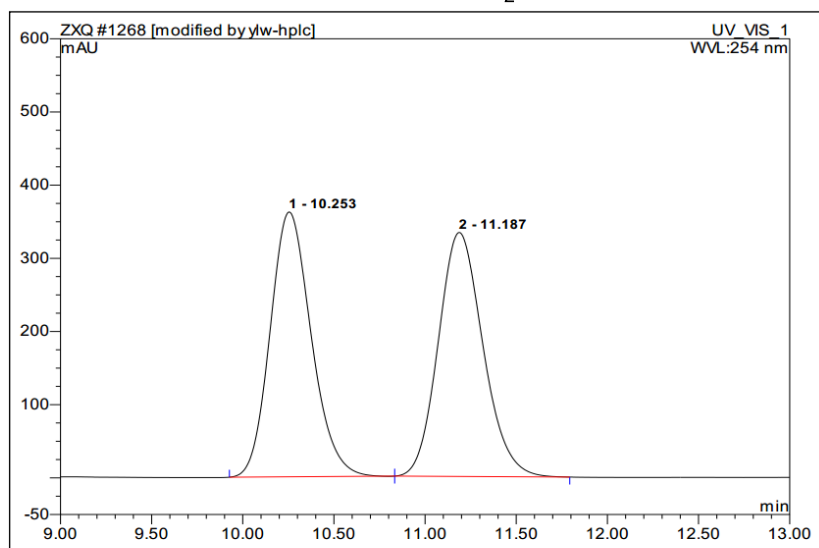

| No.           | Ret.Time<br>min | Peak Name | Height<br>mAU | Area<br>mAU*min | Rel.Area<br>% | Amount<br>n.a. | Type |
|---------------|-----------------|-----------|---------------|-----------------|---------------|----------------|------|
| 1             | 10.25           | n.a.      | 361.943       | 94.293          | 49.91         | n.a.           | BMB* |
| 2             | 11.19           | n.a.      | 333.497       | 94.624          | 50.09         | n.a.           | bMB* |
| <b>Total:</b> |                 |           | 695.440       | 188.918         | 100.00        | 0.000          |      |

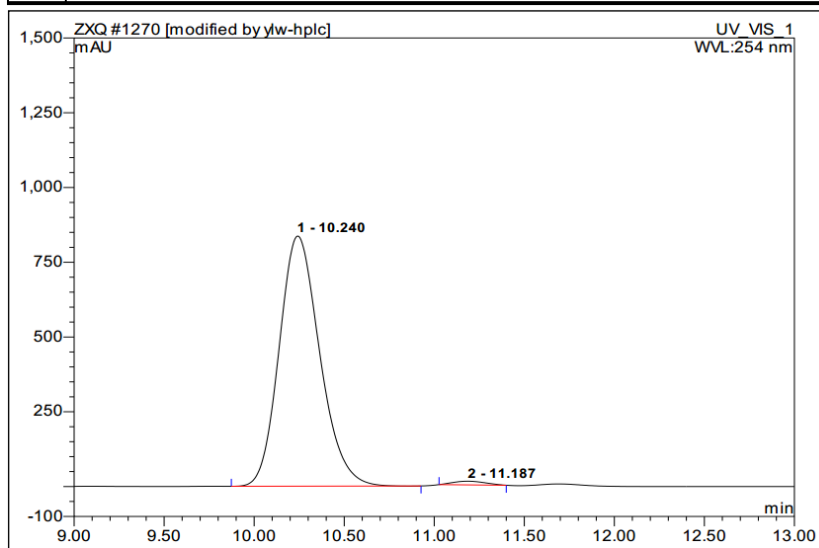

| No.           | Ret.Time<br>min | Peak Name | Height<br>mAU | Area<br>mAU*min | Rel.Area<br>% | Amount<br>n.a. | Type |
|---------------|-----------------|-----------|---------------|-----------------|---------------|----------------|------|
| 1             | 10.24           | n.a.      | 836.631       | 218.272         | 98.84         | n.a.           | BMB* |
| 2             | 11.19           | n.a.      | 12.310        | 2.569           | 1.16          | n.a.           | BMB* |
| <b>Total:</b> |                 |           | 848.941       | 220.841         | 100.00        | 0.000          |      |

**3ac:** ADH, *n*-hexane/2-propanol = 85/15,  $v = 1.0 \text{ mL min}^{-1}$ ,  $\lambda = 254 \text{ nm}$

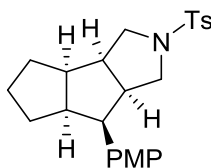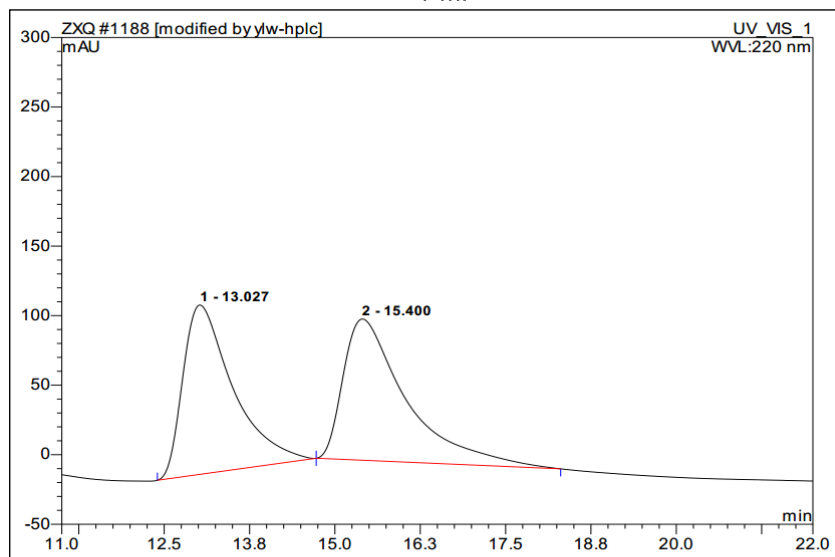

| No.           | Ret.Time<br>min | Peak Name | Height<br>mAU | Area<br>mAU*min | Rel.Area<br>% | Amount<br>n.a. | Type |
|---------------|-----------------|-----------|---------------|-----------------|---------------|----------------|------|
| 1             | 13.03           | n.a.      | 121.754       | 103.037         | 48.80         | n.a.           | BMB* |
| 2             | 15.40           | n.a.      | 101.551       | 108.107         | 51.20         | n.a.           | bMB* |
| <b>Total:</b> |                 |           | 223.305       | 211.144         | 100.00        | 0.000          |      |

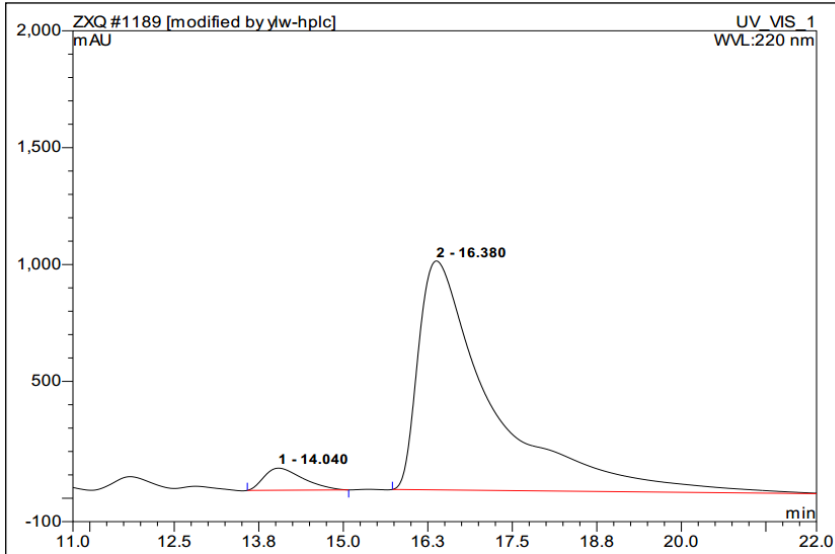

| No.           | Ret.Time<br>min | Peak Name | Height<br>mAU | Area<br>mAU*min | Rel.Area<br>% | Amount<br>n.a. | Type |
|---------------|-----------------|-----------|---------------|-----------------|---------------|----------------|------|
| 1             | 14.04           | n.a.      | 94.501        | 62.737          | 4.80          | n.a.           | BMB* |
| 2             | 16.38           | n.a.      | 979.294       | 1244.434        | 95.20         | n.a.           | BMB* |
| <b>Total:</b> |                 |           | 1073.795      | 1307.171        | 100.00        | 0.000          |      |

**3pc**: IC, *n*-hexane/2-propanol = 70/30,  $v = 1.0 \text{ mL min}^{-1}$ ,  $\lambda = 254 \text{ nm}$

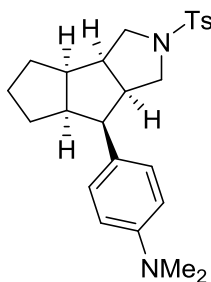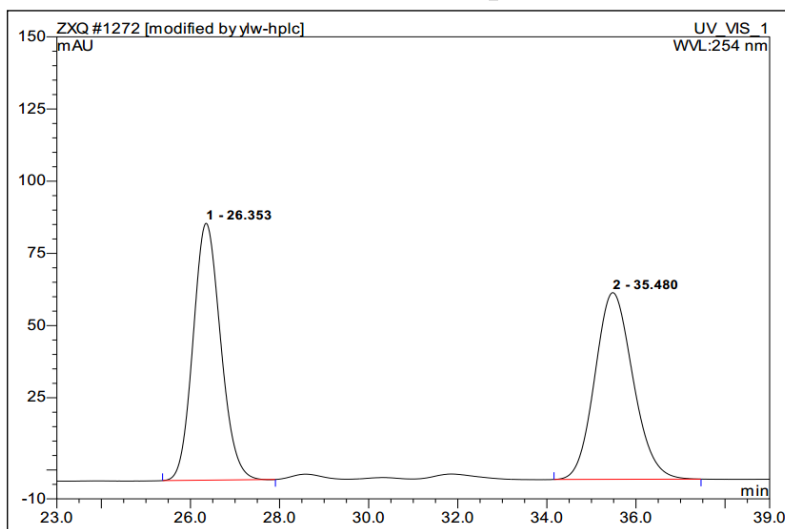

| No.           | Ret.Time<br>min | Peak Name | Height<br>mAU | Area<br>mAU*min | Rel.Area<br>% | Amount<br>n.a. | Type |
|---------------|-----------------|-----------|---------------|-----------------|---------------|----------------|------|
| 1             | 26.35           | n.a.      | 88.947        | 63.703          | 49.82         | n.a.           | BMB* |
| 2             | 35.48           | n.a.      | 64.641        | 64.158          | 50.18         | n.a.           | BMB* |
| <b>Total:</b> |                 |           | 153.588       | 127.861         | 100.00        | 0.000          |      |

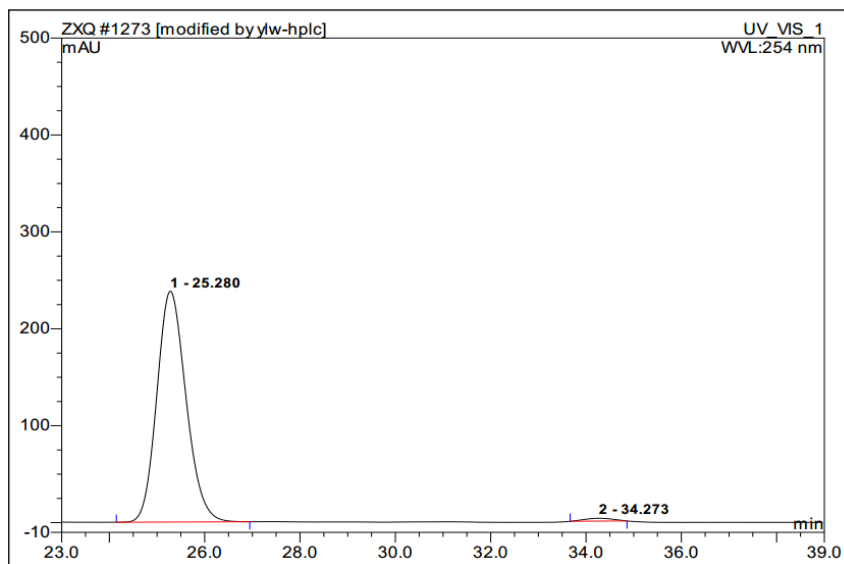

| No.           | Ret.Time<br>min | Peak Name | Height<br>mAU | Area<br>mAU*min | Rel.Area<br>% | Amount<br>n.a. | Type |
|---------------|-----------------|-----------|---------------|-----------------|---------------|----------------|------|
| 1             | 25.28           | n.a.      | 238.185       | 168.961         | 98.81         | n.a.           | BMB* |
| 2             | 34.27           | n.a.      | 2.924         | 2.036           | 1.19          | n.a.           | BMB* |
| <b>Total:</b> |                 |           | 241.109       | 170.996         | 100.00        | 0.000          |      |

3pd: IC, *n*-hexane/2-propanol = 80/20,  $v = 1.0 \text{ mL min}^{-1}$ ,  $\lambda = 254 \text{ nm}$

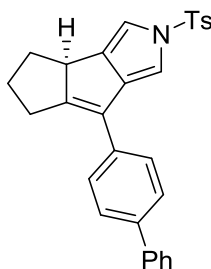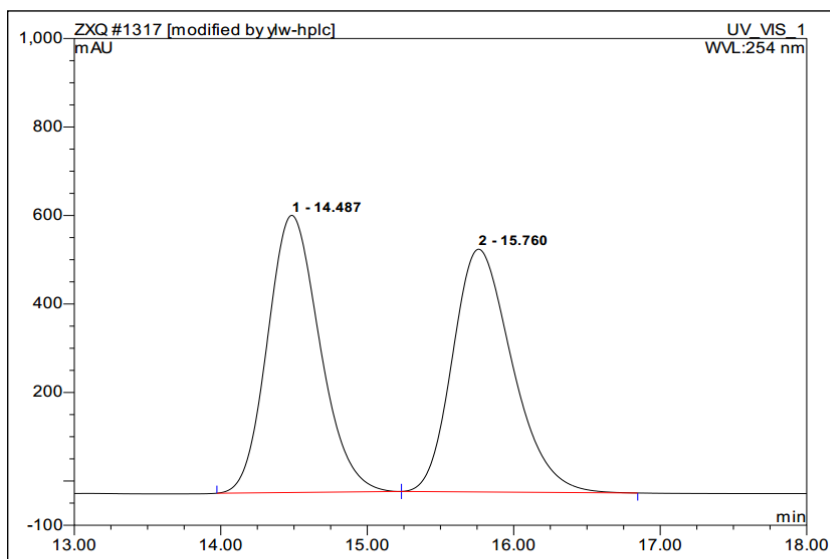

| No.           | Ret.Time min | Peak Name | Height mAU | Area mAU*min | Rel.Area % | Amount n.a. | Type |
|---------------|--------------|-----------|------------|--------------|------------|-------------|------|
| 1             | 14.49        | n.a.      | 626.332    | 258.369      | 49.99      | n.a.        | BMB* |
| 2             | 15.76        | n.a.      | 548.630    | 258.507      | 50.01      | n.a.        | bMB* |
| <b>Total:</b> |              |           | 1174.962   | 516.876      | 100.00     | 0.000       |      |

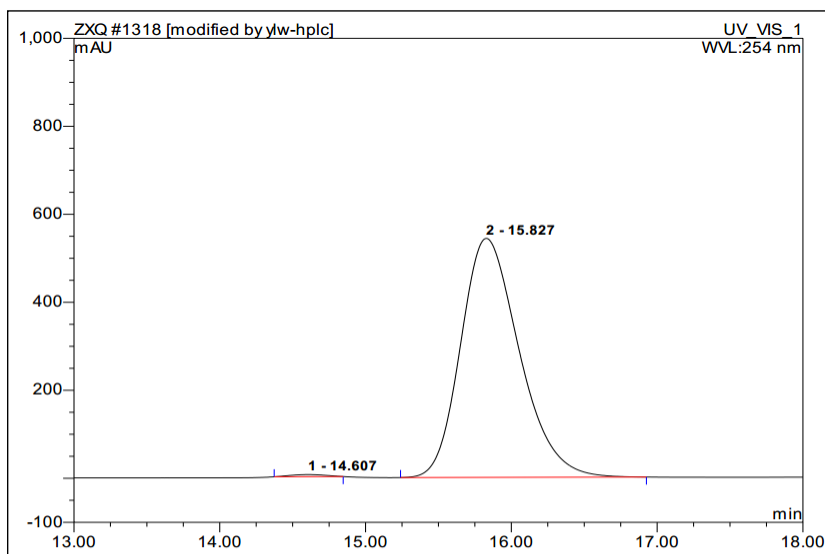

| No.           | Ret.Time min | Peak Name | Height mAU | Area mAU*min | Rel.Area % | Amount n.a. | Type |
|---------------|--------------|-----------|------------|--------------|------------|-------------|------|
| 1             | 14.61        | n.a.      | 4.756      | 1.328        | 0.52       | n.a.        | BMB* |
| 2             | 15.83        | n.a.      | 543.225    | 252.893      | 99.48      | n.a.        | BMB* |
| <b>Total:</b> |              |           | 547.981    | 254.221      | 100.00     | 0.000       |      |



3qa: ASH, *n*-hexane/2-propanol = 50/50,  $v = 1.0 \text{ mL min}^{-1}$ ,  $\lambda = 254 \text{ nm}$

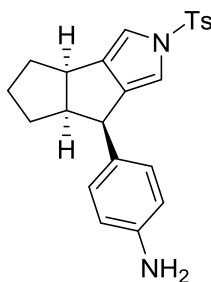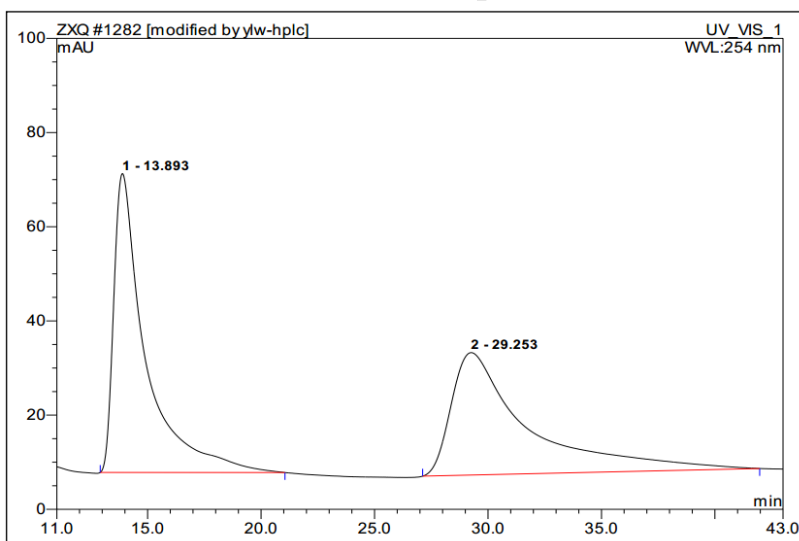

| No.           | Ret.Time<br>min | Peak Name | Height<br>mAU | Area<br>mAU*min | Rel.Area<br>% | Amount<br>n.a. | Type |
|---------------|-----------------|-----------|---------------|-----------------|---------------|----------------|------|
| 1             | 13.89           | n.a.      | 63.466        | 102.959         | 50.45         | n.a.           | BMB* |
| 2             | 29.25           | n.a.      | 25.999        | 101.110         | 49.55         | n.a.           | BMB* |
| <b>Total:</b> |                 |           | 89.466        | 204.069         | 100.00        | 0.000          |      |

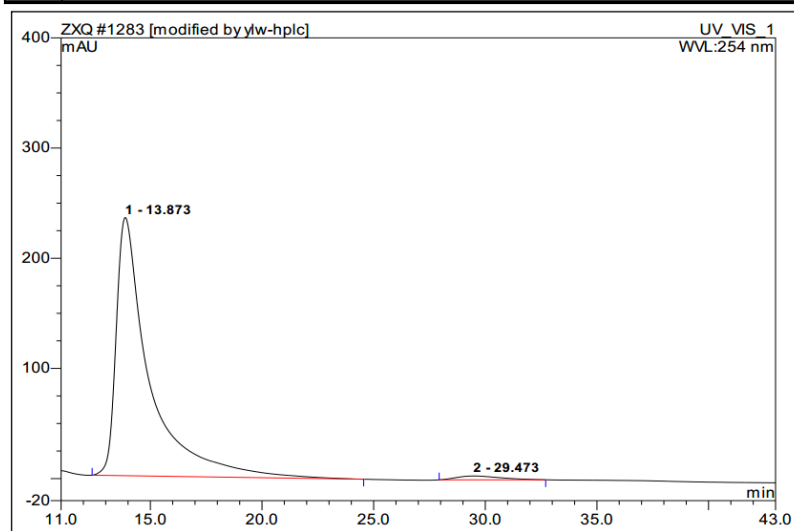

| No.           | Ret.Time<br>min | Peak Name | Height<br>mAU | Area<br>mAU*min | Rel.Area<br>% | Amount<br>n.a. | Type |
|---------------|-----------------|-----------|---------------|-----------------|---------------|----------------|------|
| 1             | 13.87           | n.a.      | 234.278       | 403.800         | 98.07         | n.a.           | BMB* |
| 2             | 29.47           | n.a.      | 3.508         | 7.958           | 1.93          | n.a.           | BMB* |
| <b>Total:</b> |                 |           | 237.786       | 411.758         | 100.00        | 0.000          |      |

**3qb:** IC, *n*-hexane/2-propanol = 50/50,  $v = 1.0 \text{ mL min}^{-1}$ ,  $\lambda = 254 \text{ nm}$

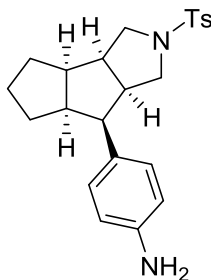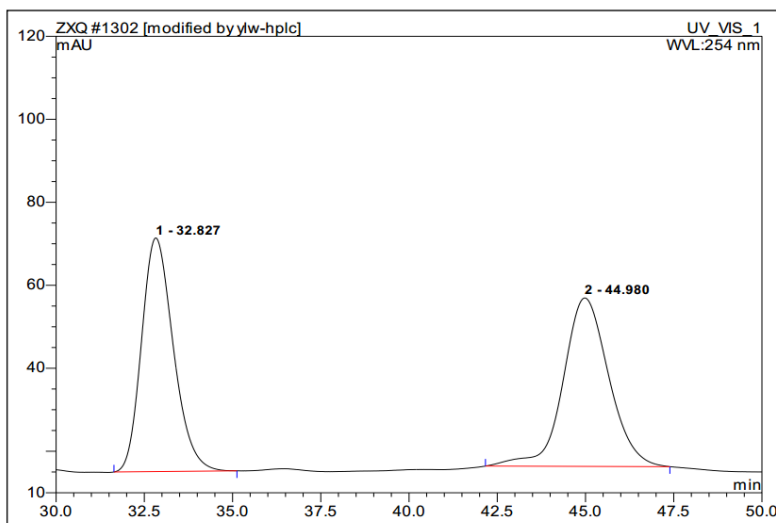

| No.           | Ret.Time<br>min | Peak Name | Height<br>mAU | Area<br>mAU*min | Rel.Area<br>% | Amount<br>n.a. | Type |
|---------------|-----------------|-----------|---------------|-----------------|---------------|----------------|------|
| 1             | 32.83           | n.a.      | 56.300        | 58.798          | 49.12         | n.a.           | BMB* |
| 2             | 44.98           | n.a.      | 40.590        | 60.901          | 50.88         | n.a.           | BMB* |
| <b>Total:</b> |                 |           | 96.890        | 119.699         | 100.00        | 0.000          |      |

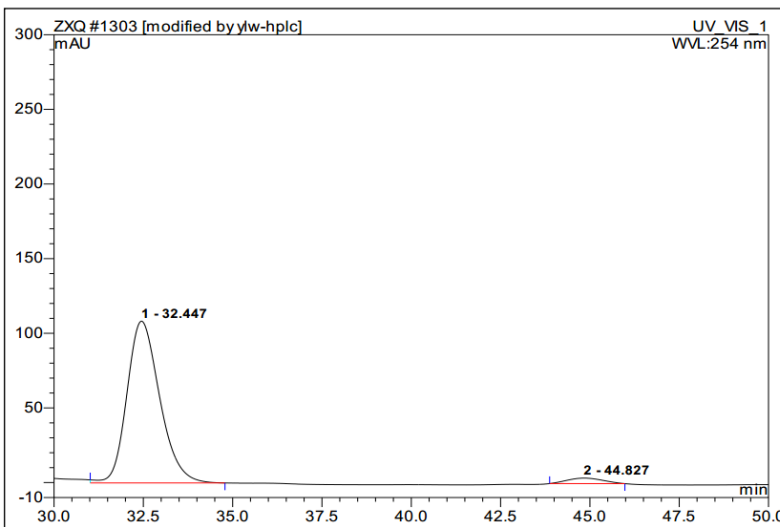

| No.           | Ret.Time<br>min | Peak Name | Height<br>mAU | Area<br>mAU*min | Rel.Area<br>% | Amount<br>n.a. | Type |
|---------------|-----------------|-----------|---------------|-----------------|---------------|----------------|------|
| 1             | 32.45           | n.a.      | 108.382       | 115.588         | 96.46         | n.a.           | MB*  |
| 2             | 44.83           | n.a.      | 3.676         | 4.241           | 3.54          | n.a.           | BMB* |
| <b>Total:</b> |                 |           | 112.058       | 119.829         | 100.00        | 0.000          |      |

[D<sub>3</sub>]-2a: ASH, *n*-hexane/2-propanol = 85/15,  $v = 1.0 \text{ mL min}^{-1}$ ,  $\lambda = 254 \text{ nm}$

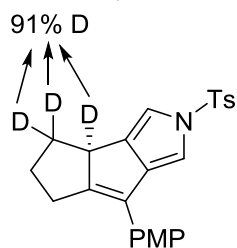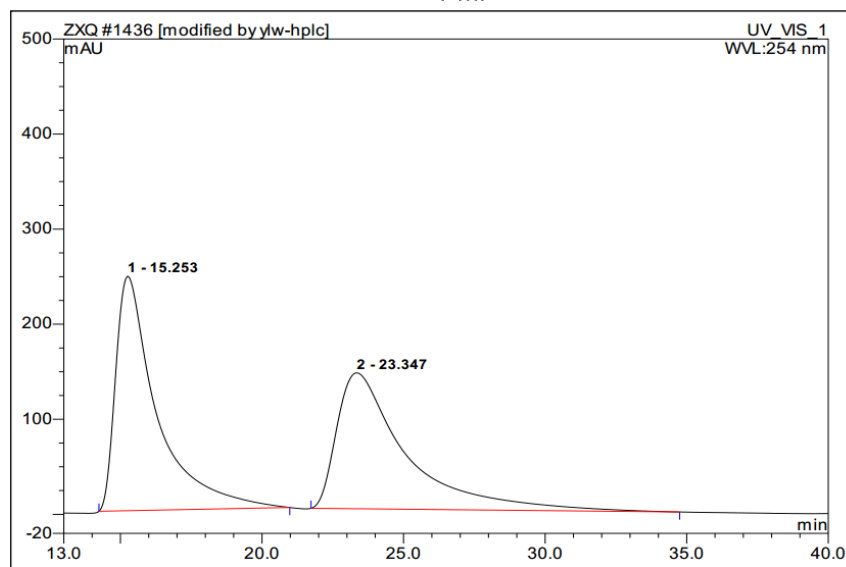

| No.           | Ret.Time<br>min | Peak Name | Height<br>mAU | Area<br>mAU*min | Rel.Area<br>% | Amount<br>n.a. | Type |
|---------------|-----------------|-----------|---------------|-----------------|---------------|----------------|------|
| 1             | 15.25           | n.a.      | 246.552       | 414.671         | 50.79         | n.a.           | BMB* |
| 2             | 23.35           | n.a.      | 142.874       | 401.720         | 49.21         | n.a.           | BMB* |
| <b>Total:</b> |                 |           | 389.426       | 816.391         | 100.00        | 0.000          |      |

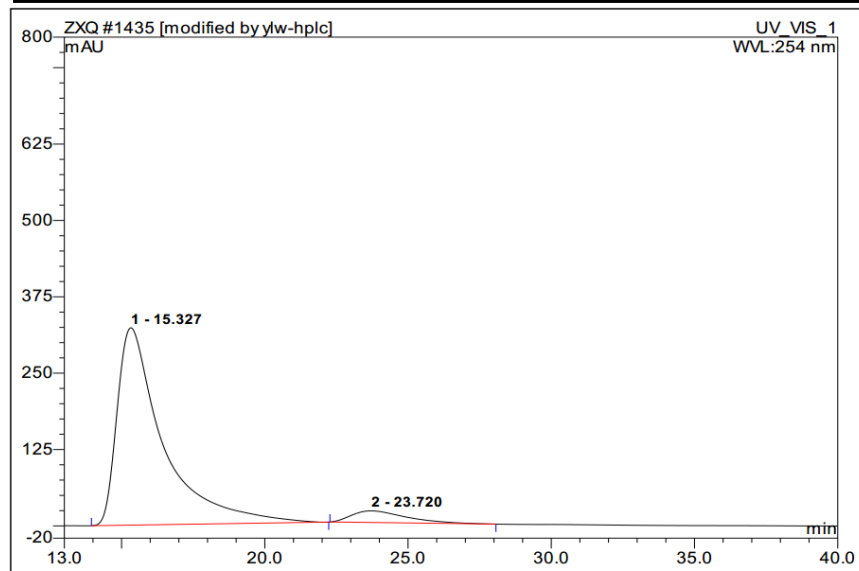

| No.           | Ret.Time<br>min | Peak Name | Height<br>mAU | Area<br>mAU*min | Rel.Area<br>% | Amount<br>n.a. | Type |
|---------------|-----------------|-----------|---------------|-----------------|---------------|----------------|------|
| 1             | 15.33           | n.a.      | 322.927       | 600.385         | 93.46         | n.a.           | BMB* |
| 2             | 23.72           | n.a.      | 19.020        | 41.980          | 6.54          | n.a.           | BMB* |
| <b>Total:</b> |                 |           | 341.947       | 642.365         | 100.00        | 0.000          |      |

[D]-2a (29% D): ASH, *n*-hexane/2-propanol = 85/15,  $v = 1.0 \text{ mL min}^{-1}$ ,  $\lambda = 254 \text{ nm}$

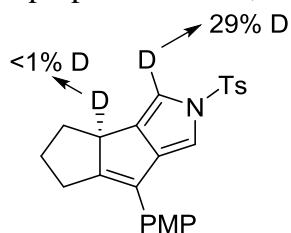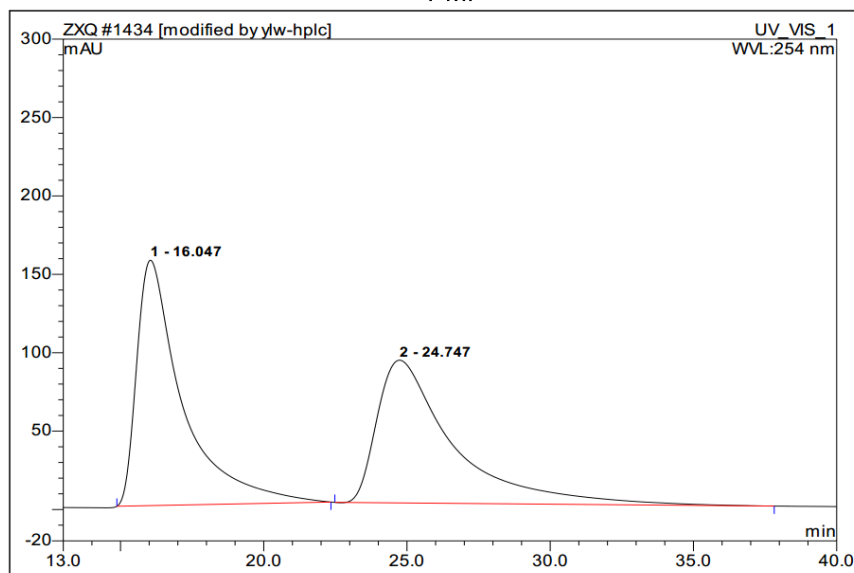

| No.           | Ret.Time<br>min | Peak Name | Height<br>mAU | Area<br>mAU*min | Rel.Area<br>% | Amount<br>n.a. | Type |
|---------------|-----------------|-----------|---------------|-----------------|---------------|----------------|------|
| 1             | 16.05           | n.a.      | 156.485       | 289.613         | 50.92         | n.a.           | BMB* |
| 2             | 24.75           | n.a.      | 91.036        | 279.095         | 49.08         | n.a.           | BMB* |
| <b>Total:</b> |                 |           | 247.520       | 568.708         | 100.00        | 0.000          |      |

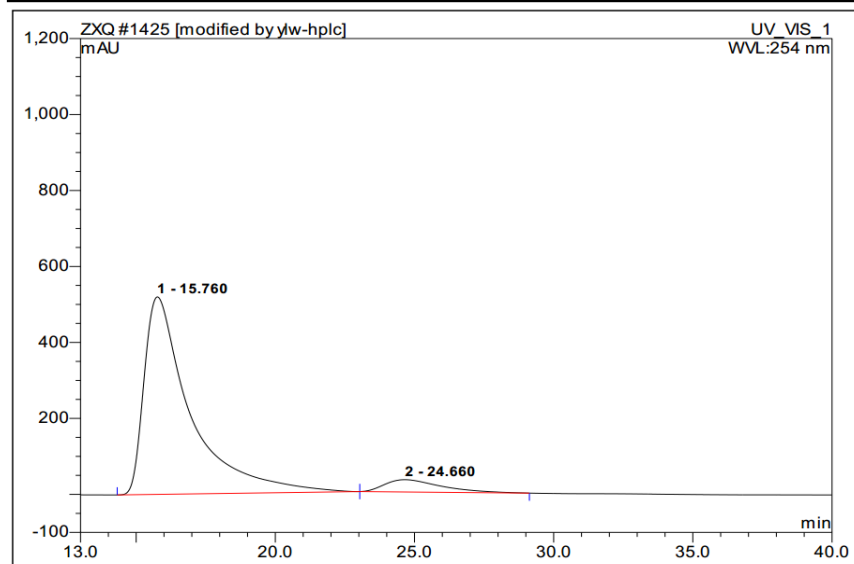

| No.           | Ret.Time<br>min | Peak Name | Height<br>mAU | Area<br>mAU*min | Rel.Area<br>% | Amount<br>n.a. | Type |
|---------------|-----------------|-----------|---------------|-----------------|---------------|----------------|------|
| 1             | 15.76           | n.a.      | 519.832       | 1001.240        | 92.99         | n.a.           | BMB* |
| 2             | 24.66           | n.a.      | 32.292        | 75.525          | 7.01          | n.a.           | bMB* |
| <b>Total:</b> |                 |           | 552.124       | 1076.765        | 100.00        | 0.000          |      |

[D]-2a (46% D): ASH, *n*-hexane/2-propanol = 85/15,  $v = 1.0 \text{ mL min}^{-1}$ ,  $\lambda = 254 \text{ nm}$

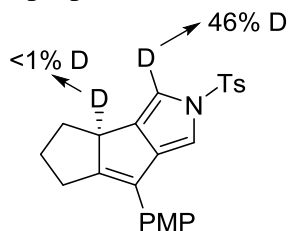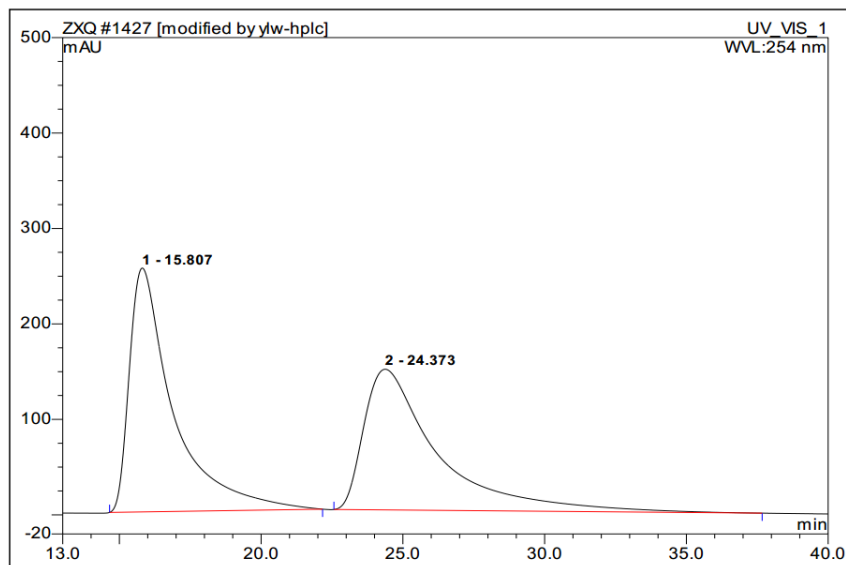

| No.           | Ret.Time<br>min | Peak Name | Height<br>mAU | Area<br>mAU*min | Rel.Area<br>% | Amount<br>n.a. | Type |
|---------------|-----------------|-----------|---------------|-----------------|---------------|----------------|------|
| 1             | 15.81           | n.a.      | 255.473       | 457.902         | 50.89         | n.a.           | BMB* |
| 2             | 24.37           | n.a.      | 147.365       | 441.908         | 49.11         | n.a.           | BMB* |
| <b>Total:</b> |                 |           | 402.838       | 899.810         | 100.00        | 0.000          |      |

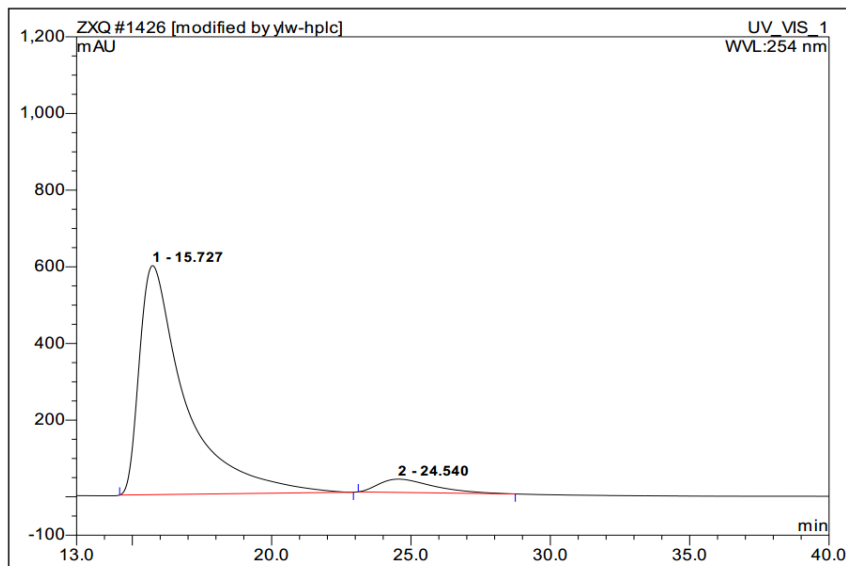

| No.           | Ret.Time<br>min | Peak Name | Height<br>mAU | Area<br>mAU*min | Rel.Area<br>% | Amount<br>n.a. | Type |
|---------------|-----------------|-----------|---------------|-----------------|---------------|----------------|------|
| 1             | 15.73           | n.a.      | 597.314       | 1141.499        | 93.57         | n.a.           | BMB* |
| 2             | 24.54           | n.a.      | 34.434        | 78.410          | 6.43          | n.a.           | BMB* |
| <b>Total:</b> |                 |           | 631.748       | 1219.909        | 100.00        | 0.000          |      |

[D<sub>2</sub>]-**2a** (30% D): ASH, *n*-hexane/2-propanol = 85/15,  $v = 1.0 \text{ mL min}^{-1}$ ,  $\lambda = 254 \text{ nm}$

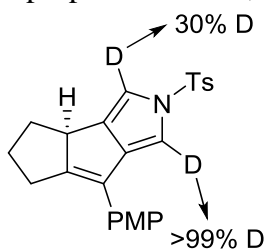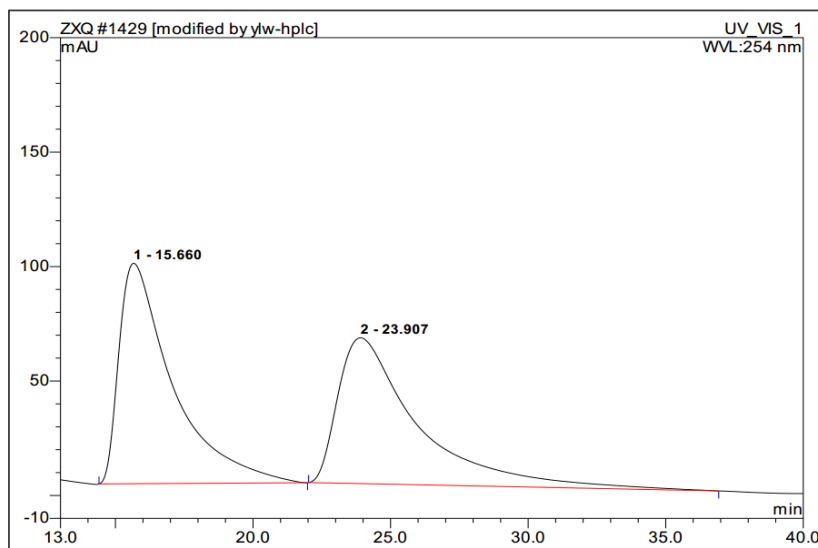

| No.           | Ret.Time min | Peak Name | Height mAU | Area mAU*min | Rel.Area % | Amount n.a. | Type |
|---------------|--------------|-----------|------------|--------------|------------|-------------|------|
| 1             | 15.66        | n.a.      | 96.311     | 217.085      | 50.58      | n.a.        | BMB* |
| 2             | 23.91        | n.a.      | 63.714     | 212.107      | 49.42      | n.a.        | BMB* |
| <b>Total:</b> |              |           | 160.024    | 429.192      | 100.00     | 0.000       |      |

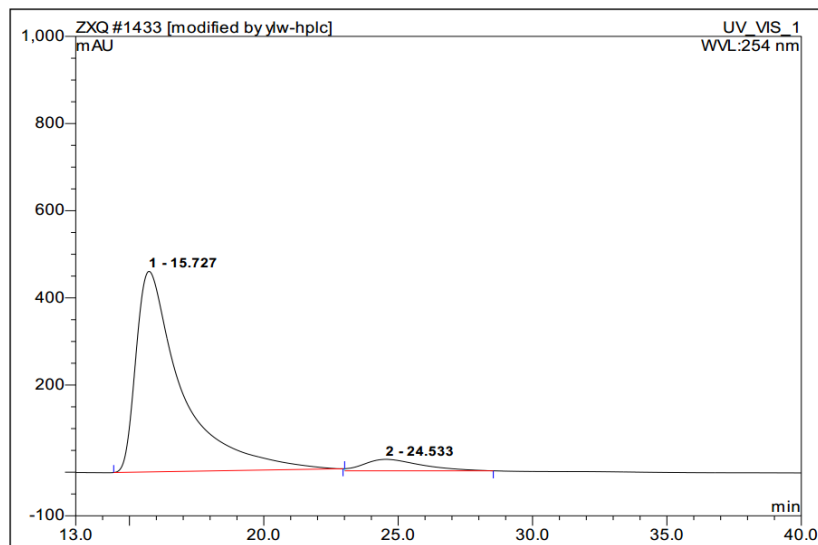

| No.           | Ret.Time min | Peak Name | Height mAU | Area mAU*min | Rel.Area % | Amount n.a. | Type |
|---------------|--------------|-----------|------------|--------------|------------|-------------|------|
| 1             | 15.73        | n.a.      | 460.148    | 911.268      | 93.33      | n.a.        | BMB* |
| 2             | 24.53        | n.a.      | 26.270     | 65.136       | 6.67       | n.a.        | MB*  |
| <b>Total:</b> |              |           | 486.418    | 976.404      | 100.00     | 0.000       |      |

[D<sub>2</sub>]-**2a** (6% D): ASH, *n*-hexane/2-propanol = 85/15,  $v = 1.0 \text{ mL min}^{-1}$ ,  $\lambda = 254 \text{ nm}$

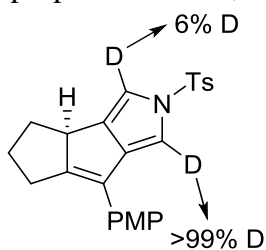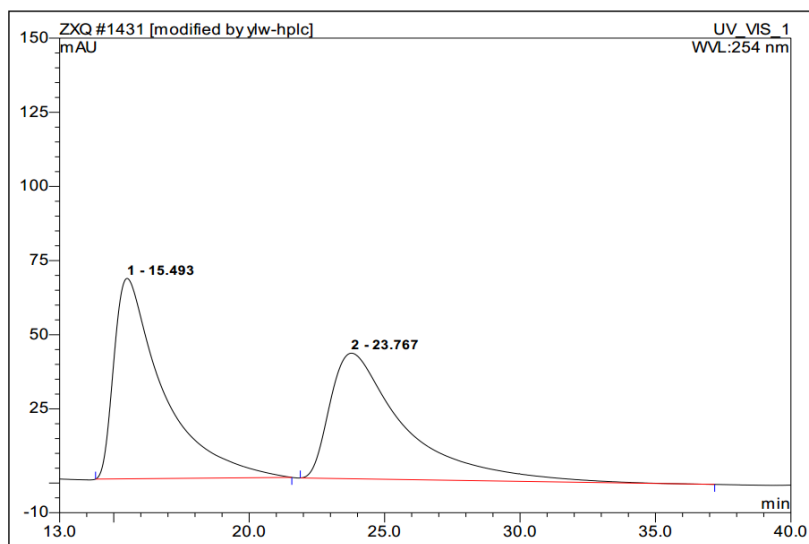

| No.           | Ret.Time<br>min | Peak Name | Height<br>mAU | Area<br>mAU*min | Rel.Area<br>% | Amount<br>n.a. | Type |
|---------------|-----------------|-----------|---------------|-----------------|---------------|----------------|------|
| 1             | 15.49           | n.a.      | 67.562        | 142.198         | 51.41         | n.a.           | BMB* |
| 2             | 23.77           | n.a.      | 42.332        | 134.401         | 48.59         | n.a.           | BMB* |
| <b>Total:</b> |                 |           | 109.893       | 276.599         | 100.00        | 0.000          |      |

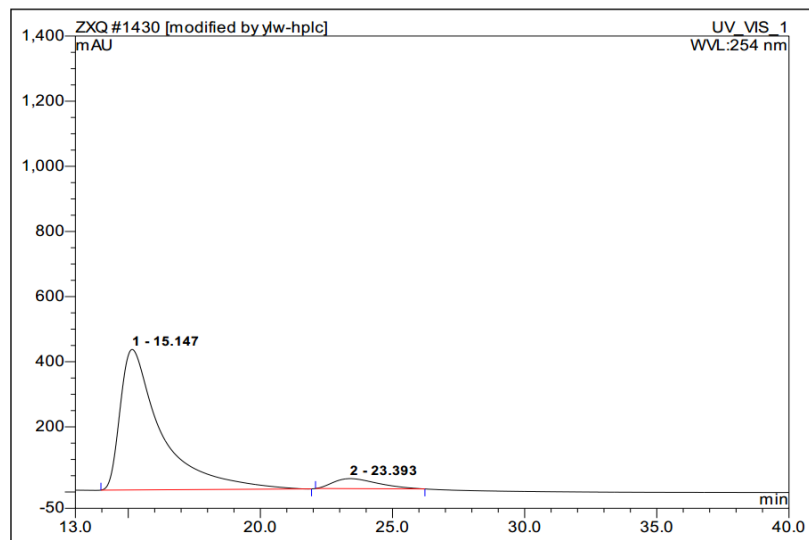

| No.           | Ret.Time<br>min | Peak Name | Height<br>mAU | Area<br>mAU*min | Rel.Area<br>% | Amount<br>n.a. | Type |
|---------------|-----------------|-----------|---------------|-----------------|---------------|----------------|------|
| 1             | 15.15           | n.a.      | 431.362       | 782.915         | 92.82         | n.a.           | BMB* |
| 2             | 23.39           | n.a.      | 30.812        | 60.600          | 7.18          | n.a.           | BMB* |
| <b>Total:</b> |                 |           | 462.174       | 843.514         | 100.00        | 0.000          |      |

| Parameter                | Value               |
|--------------------------|---------------------|
| 1 Title                  | CDQ-1-120           |
| 2 Origin                 | Bruker BioSpin GmbH |
| 3 Solvent                | CDC13               |
| 4 Temperature            | 300.2               |
| 5 Number of Scans        | 7                   |
| 6 Acquisition Time       | 3.9846              |
| 7 Acquisition Date       | 2019-09-03T22:15:27 |
| 8 Spectrometer Frequency | 400.03              |
| 9 Spectral Width         | 8223.7              |

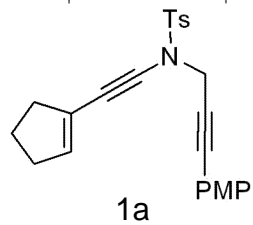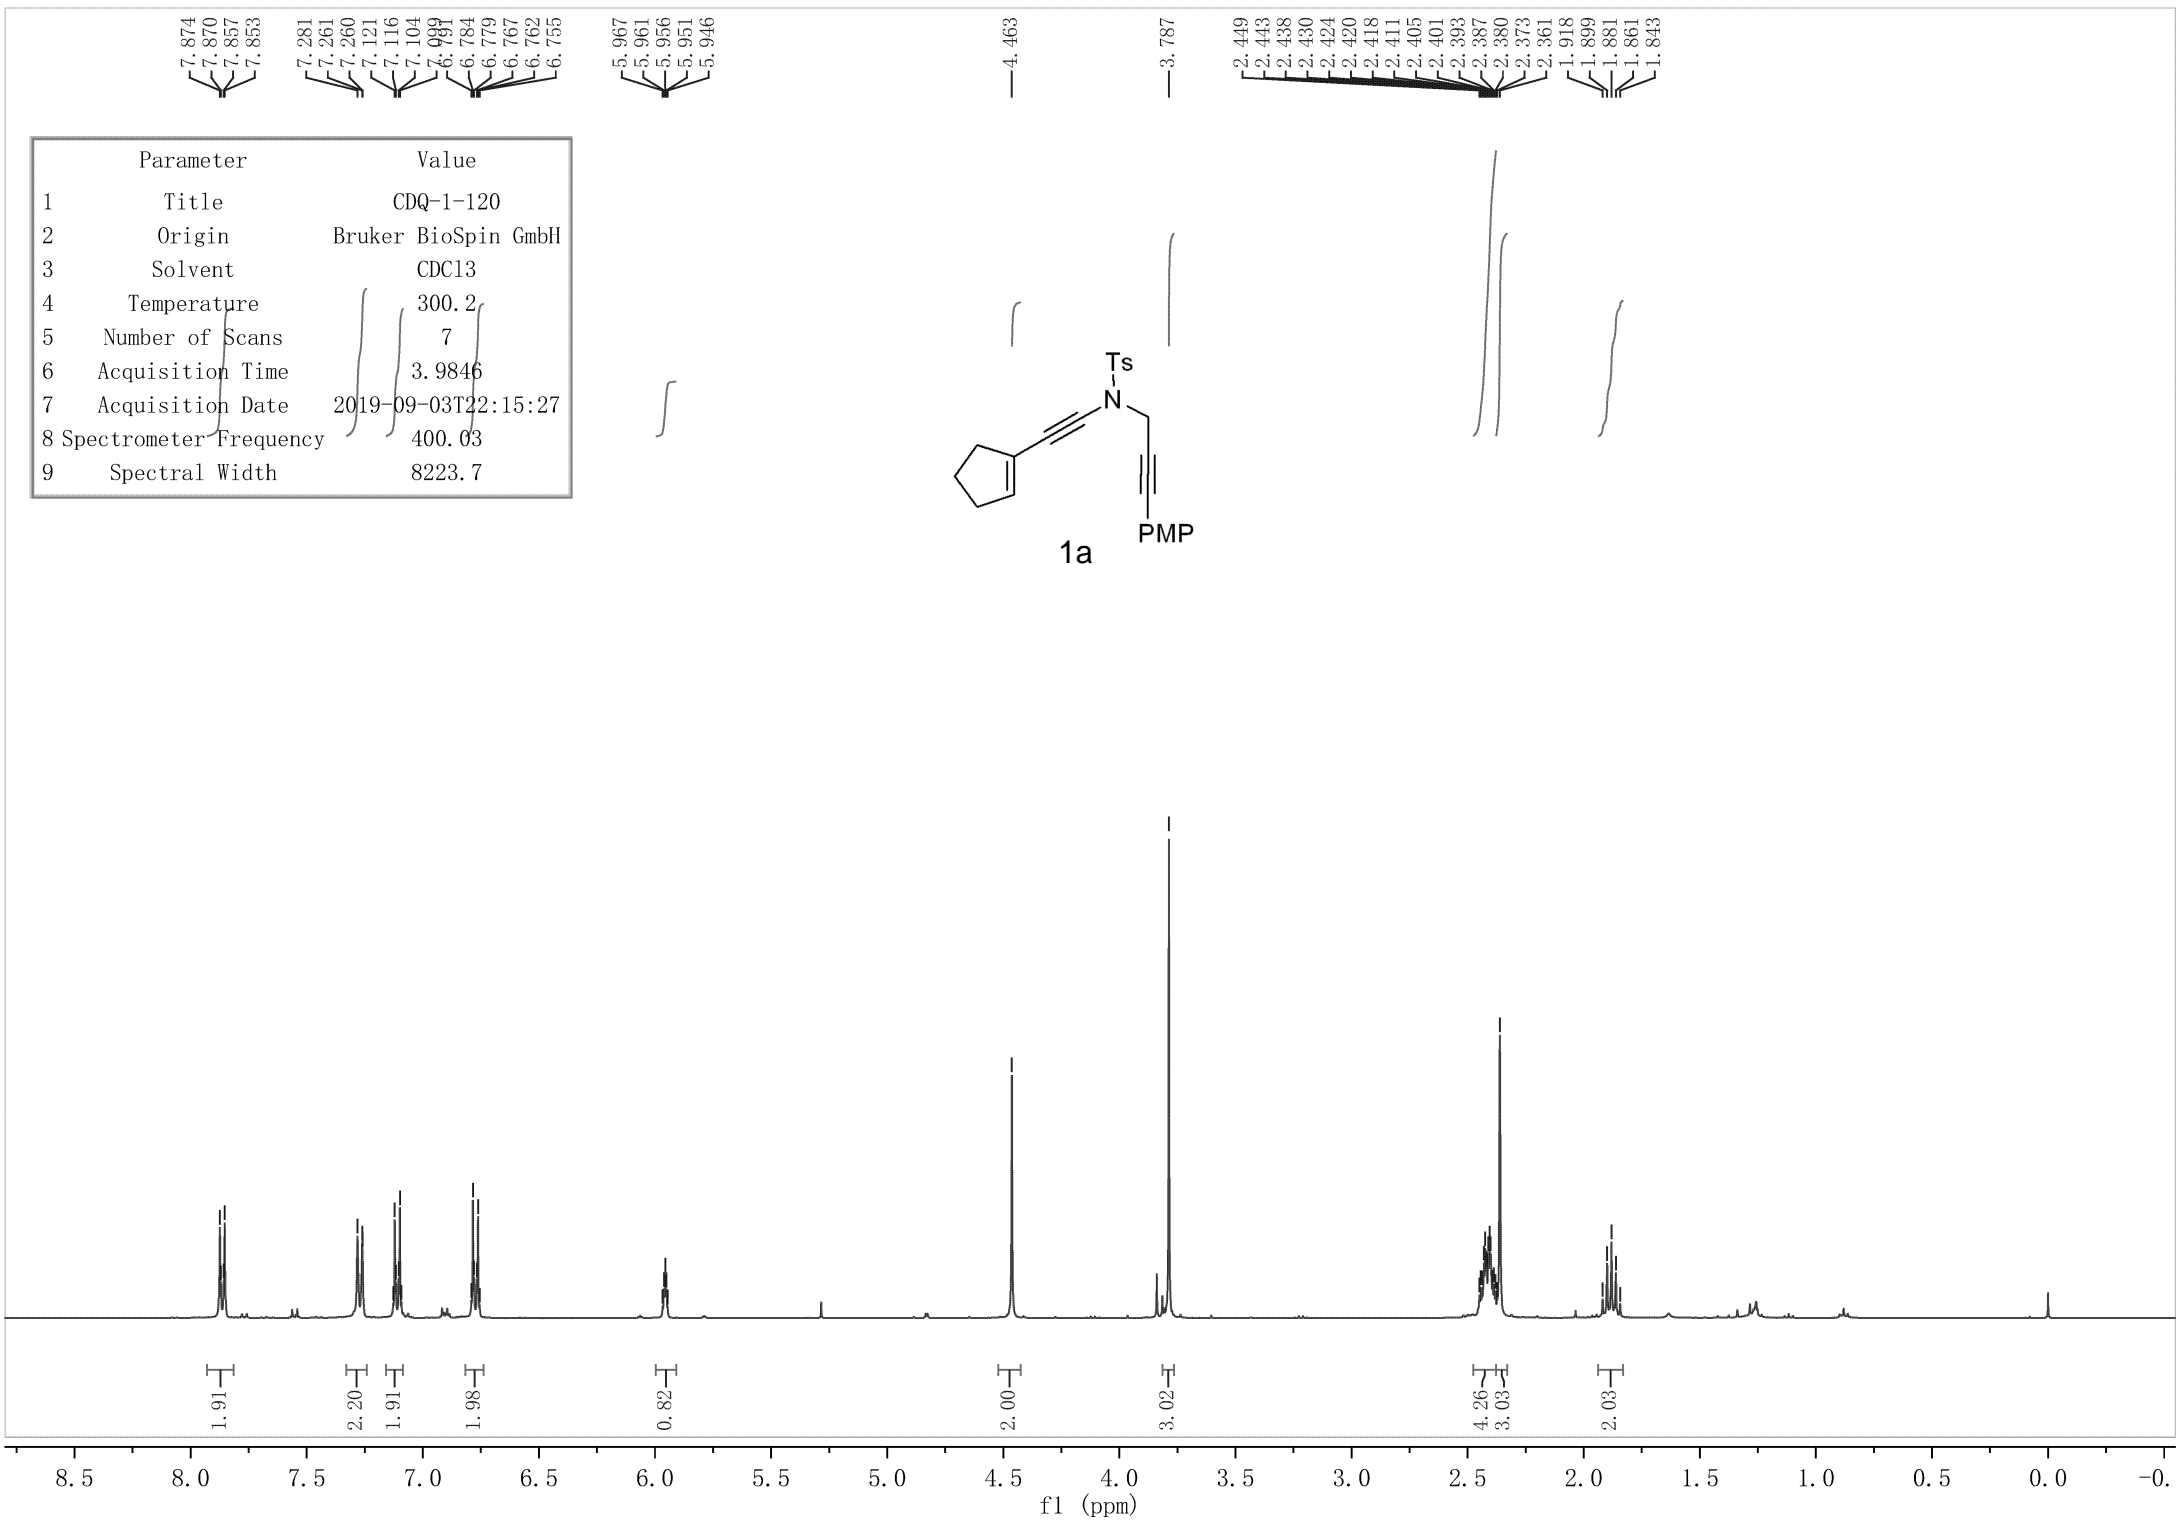

7.874  
7.870  
7.857  
7.853

7.281  
7.261  
7.260  
7.121  
7.116  
7.104

6.989  
6.981  
6.784  
6.779  
6.767  
6.762  
6.755

5.967  
5.961  
5.956  
5.951  
5.946

4.463

3.787

2.449  
2.443  
2.438  
2.430  
2.424  
2.420  
2.418  
2.411  
2.405  
2.401

2.393  
2.387  
2.380  
2.373  
2.361

1.918  
1.899  
1.881  
1.861  
1.843



| Parameter                | Value               |
|--------------------------|---------------------|
| 1 Title                  | CDQ-1-120-C         |
| 2 Origin                 | Bruker BioSpin GmbH |
| 3 Solvent                | CDC13               |
| 4 Temperature            | 300.5               |
| 5 Number of Scans        | 23                  |
| 6 Acquisition Time       | 1.3631              |
| 7 Acquisition Date       | 2019-09-03T22:19:26 |
| 8 Spectrometer Frequency | 100.59              |
| 9 Spectral Width         | 24038.5             |

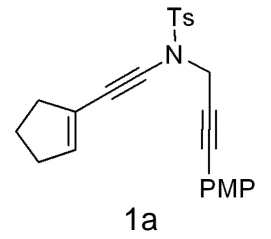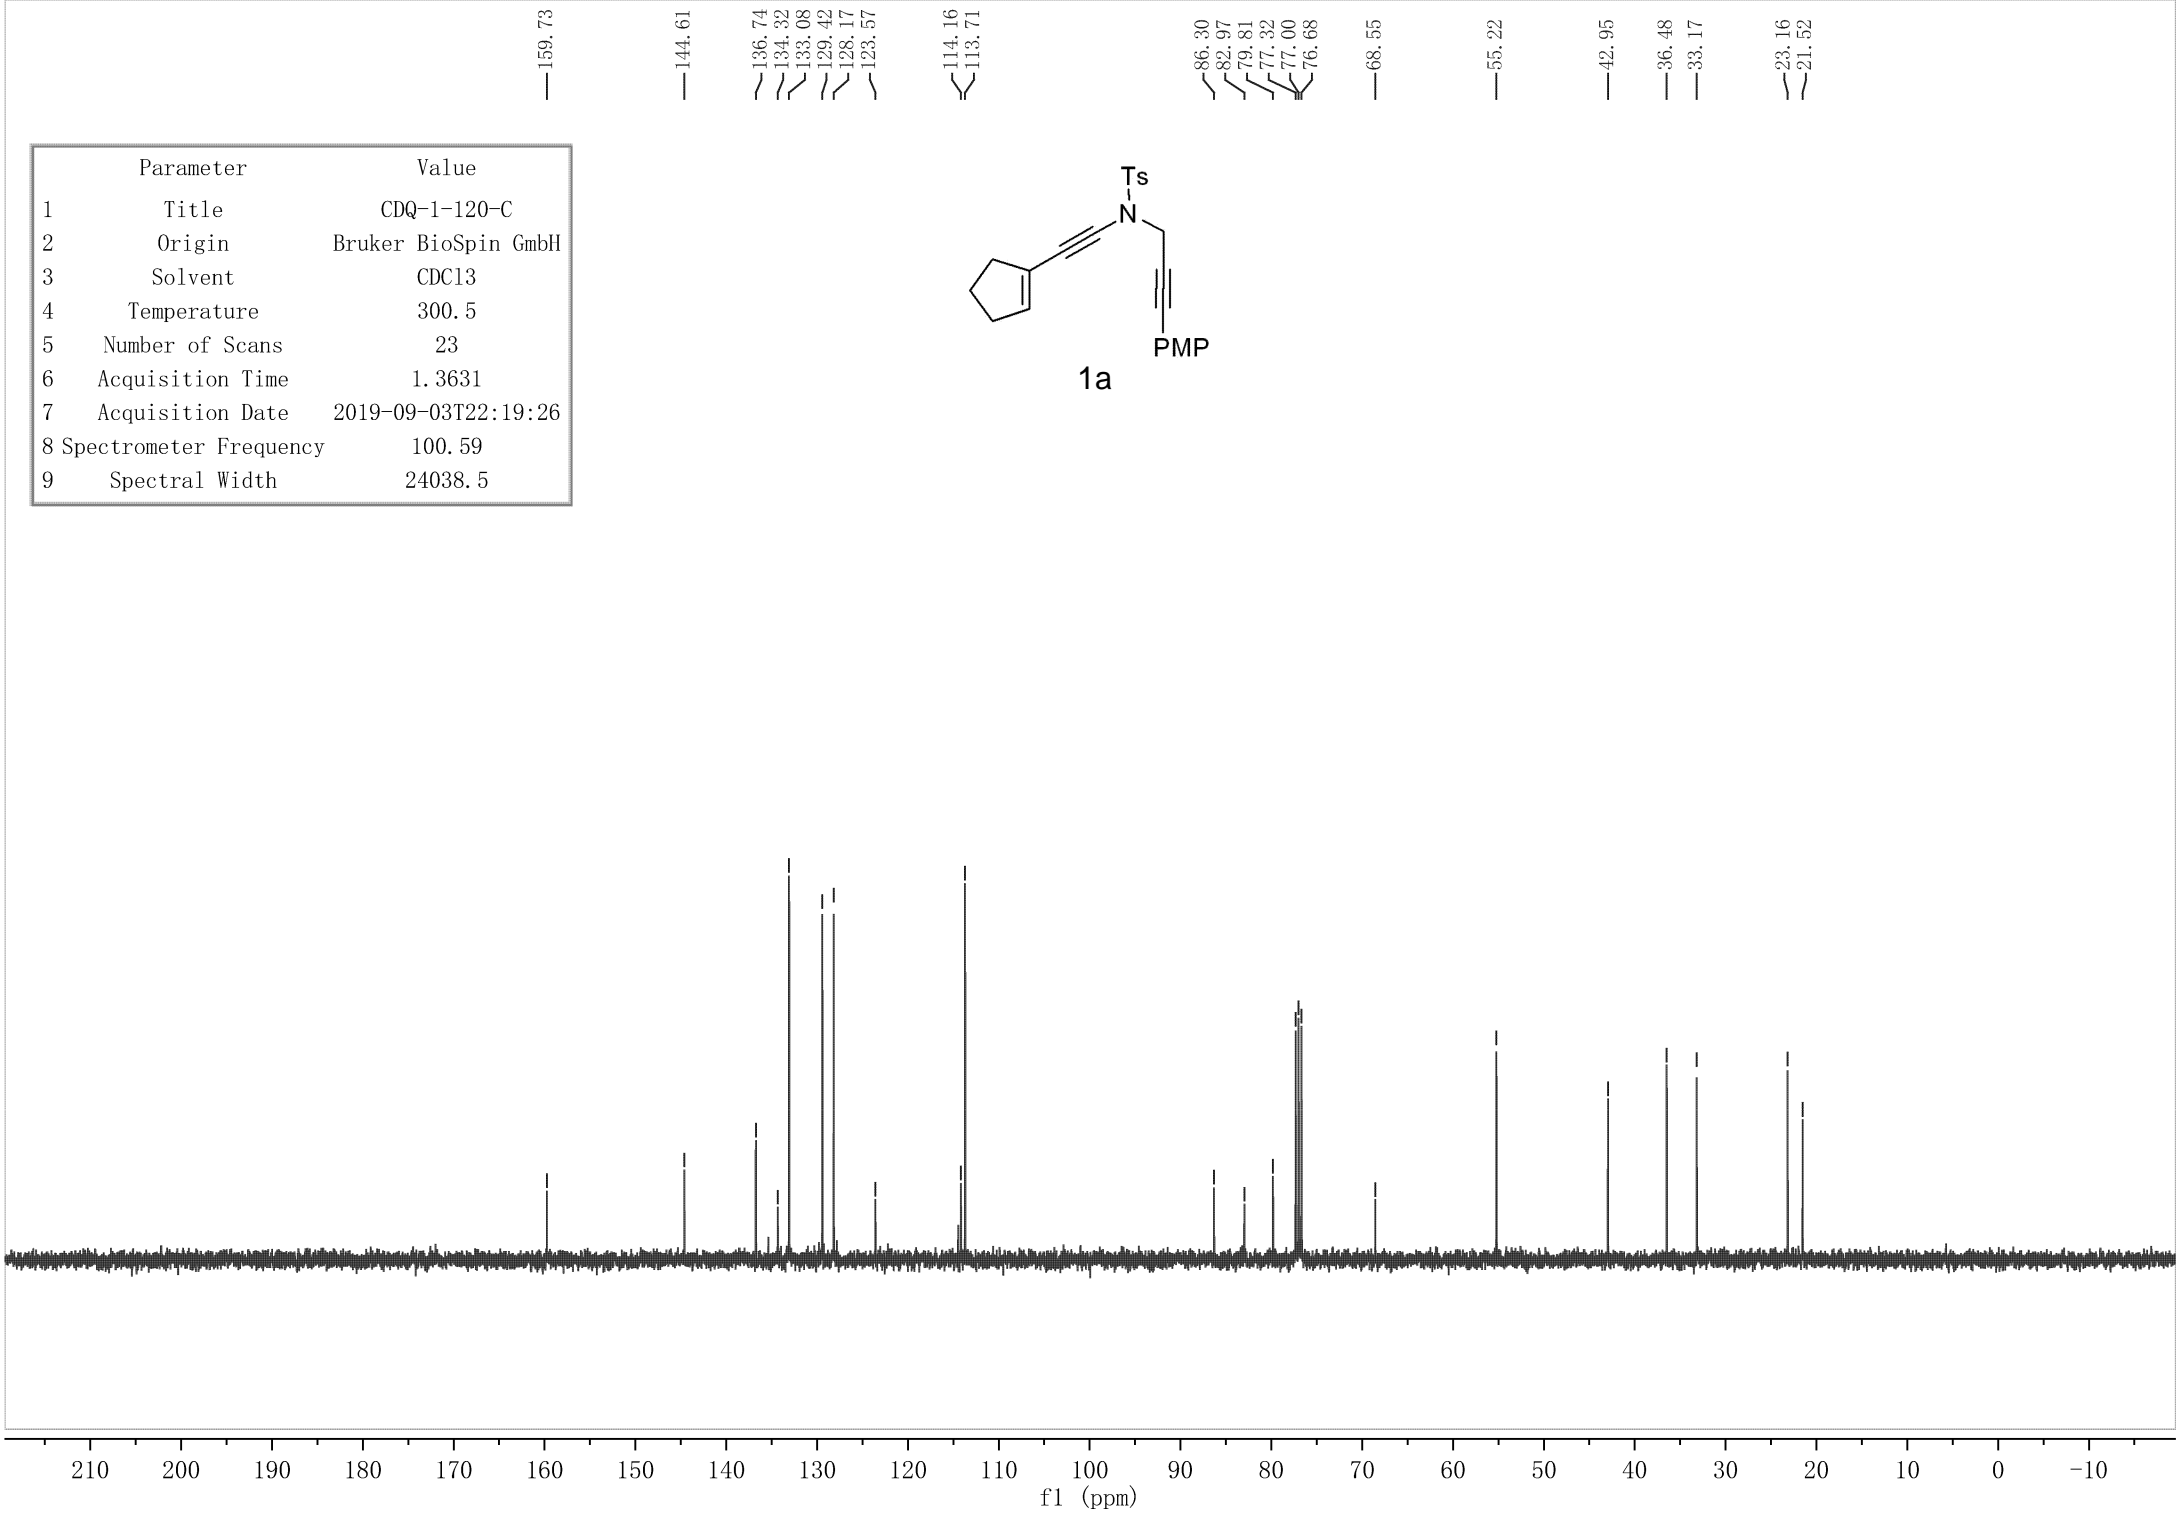

| Parameter                | Value               |
|--------------------------|---------------------|
| 1 Title                  | ZXQ-20-9            |
| 2 Origin                 | Bruker BioSpin GmbH |
| 3 Solvent                | CDC13               |
| 4 Temperature            | 298.0               |
| 5 Number of Scans        | 7                   |
| 6 Acquisition Time       | 4.0894              |
| 7 Acquisition Date       | 2020-04-06T14:16:15 |
| 8 Spectrometer Frequency | 400.13              |
| 9 Spectral Width         | 8012.8              |

8.000  
7.981  
7.978  
7.584  
7.510  
7.510  
7.490  
7.478  
7.458  
7.133  
7.111  
6.783  
6.761

5.964  
5.959  
5.954

4.493

3.784

2.442  
2.437  
2.432  
2.422  
2.417  
2.409  
2.404  
2.399  
2.385  
2.379  
1.916  
1.896  
1.878  
1.859  
1.840

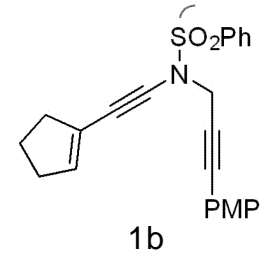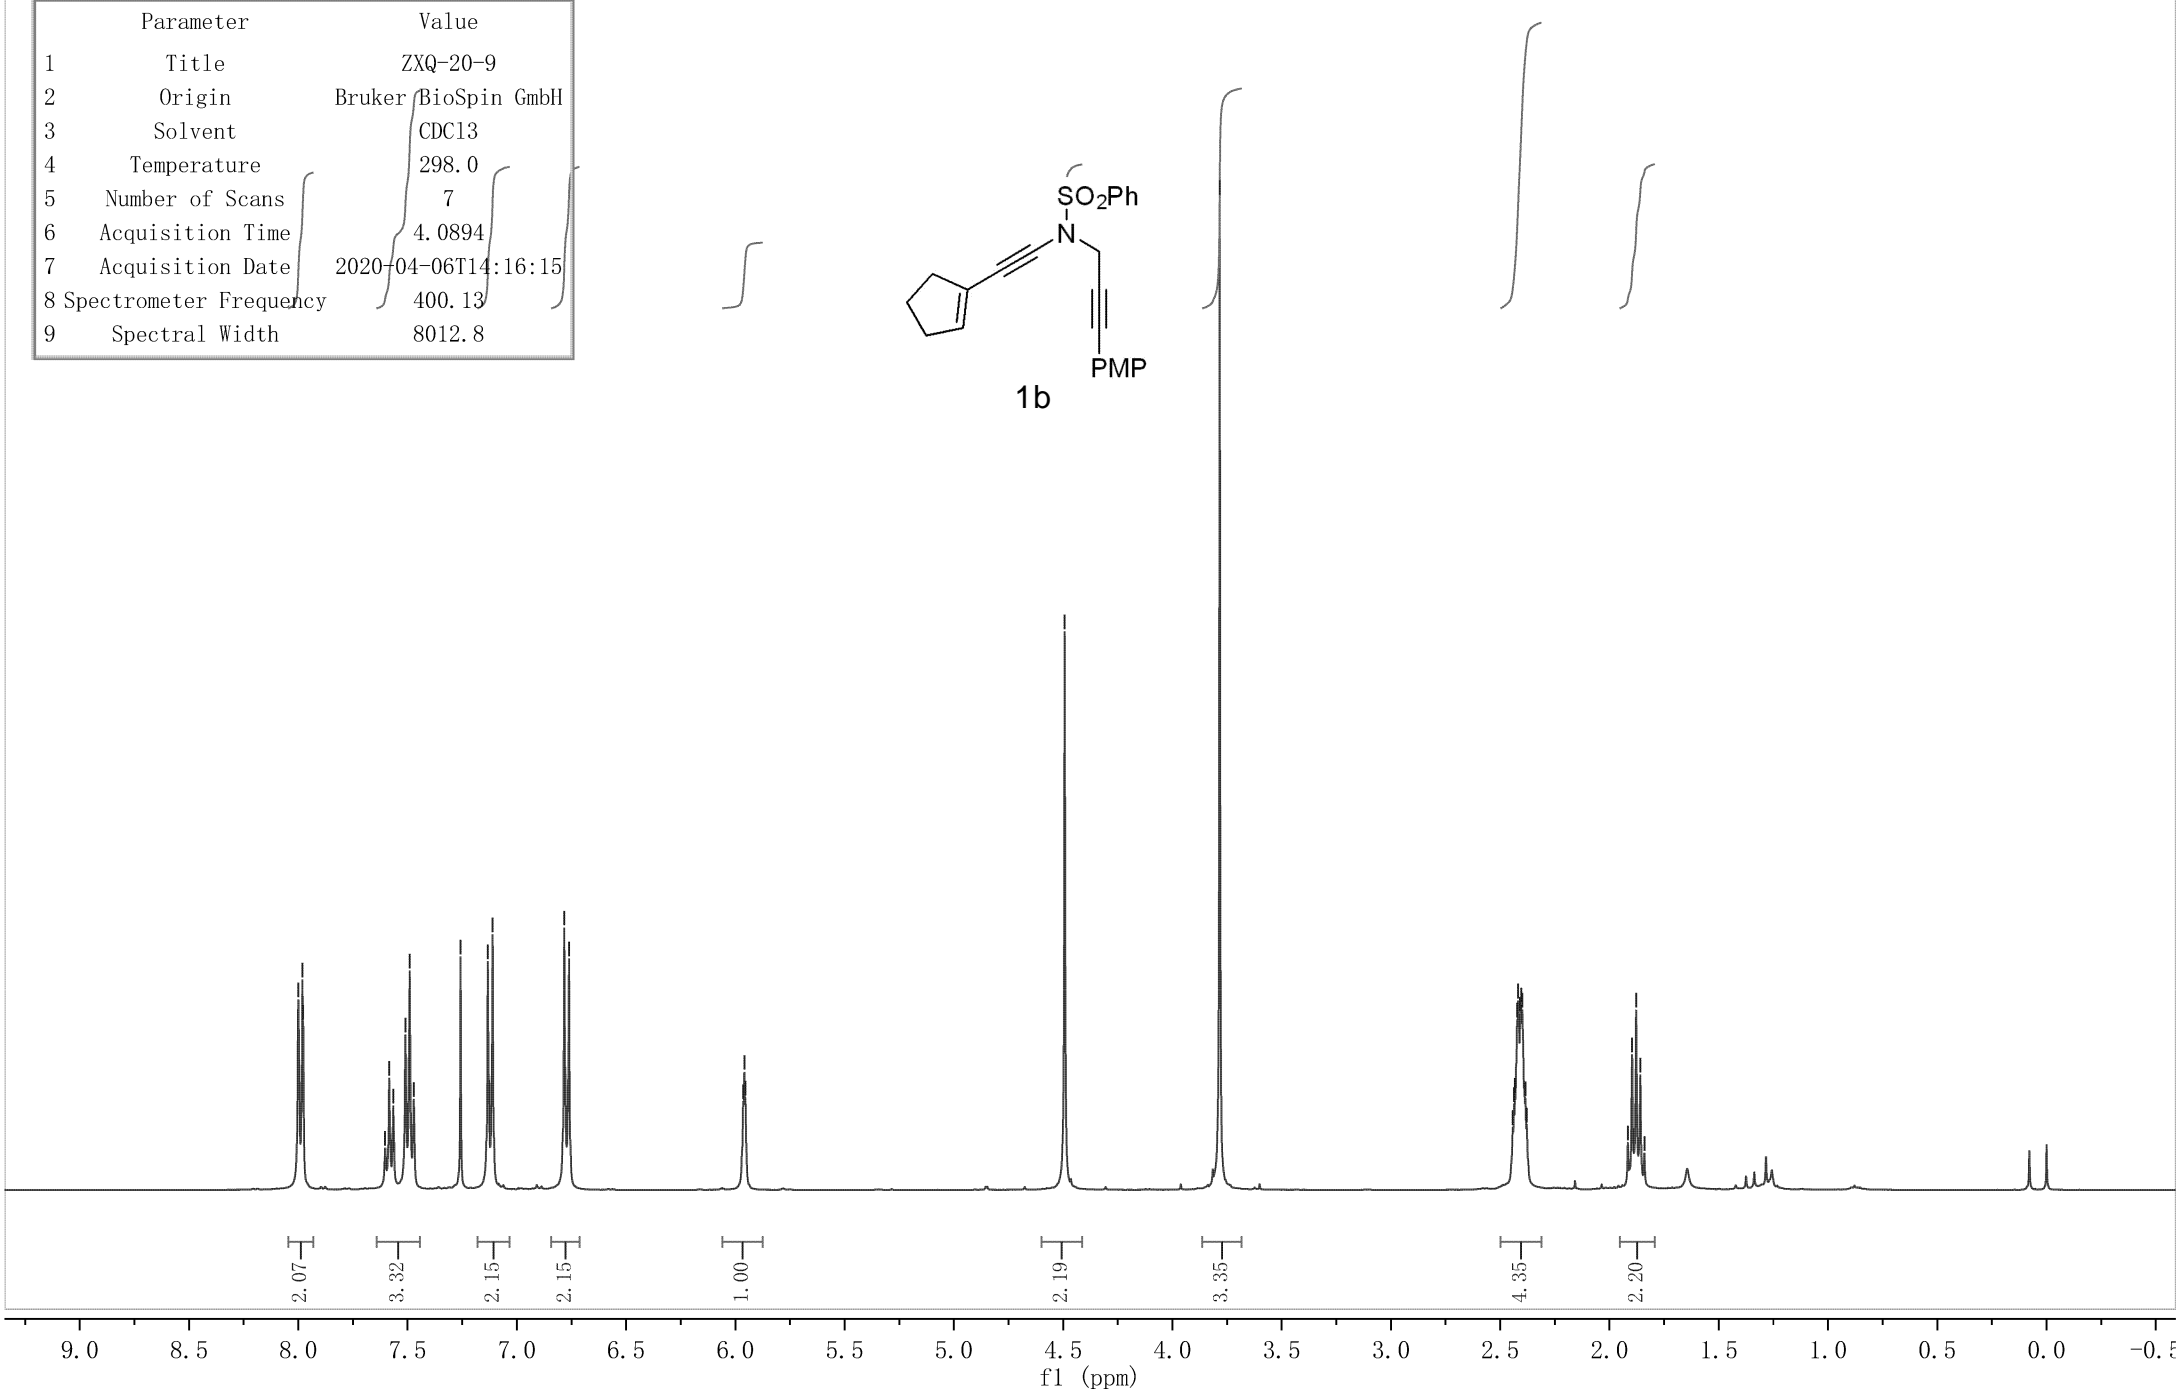

| Parameter                | Value               |
|--------------------------|---------------------|
| 1 Title                  | ZXQ-20-9-C          |
| 2 Origin                 | Bruker BioSpin GmbH |
| 3 Solvent                | CDC13               |
| 4 Temperature            | 300.0               |
| 5 Number of Scans        | 20                  |
| 6 Acquisition Time       | 1.3631              |
| 7 Acquisition Date       | 2020-04-06T14:17:37 |
| 8 Spectrometer Frequency | 100.61              |
| 9 Spectral Width         | 24038.5             |

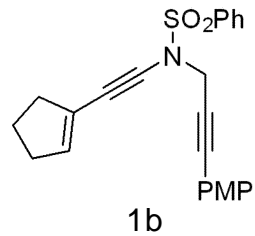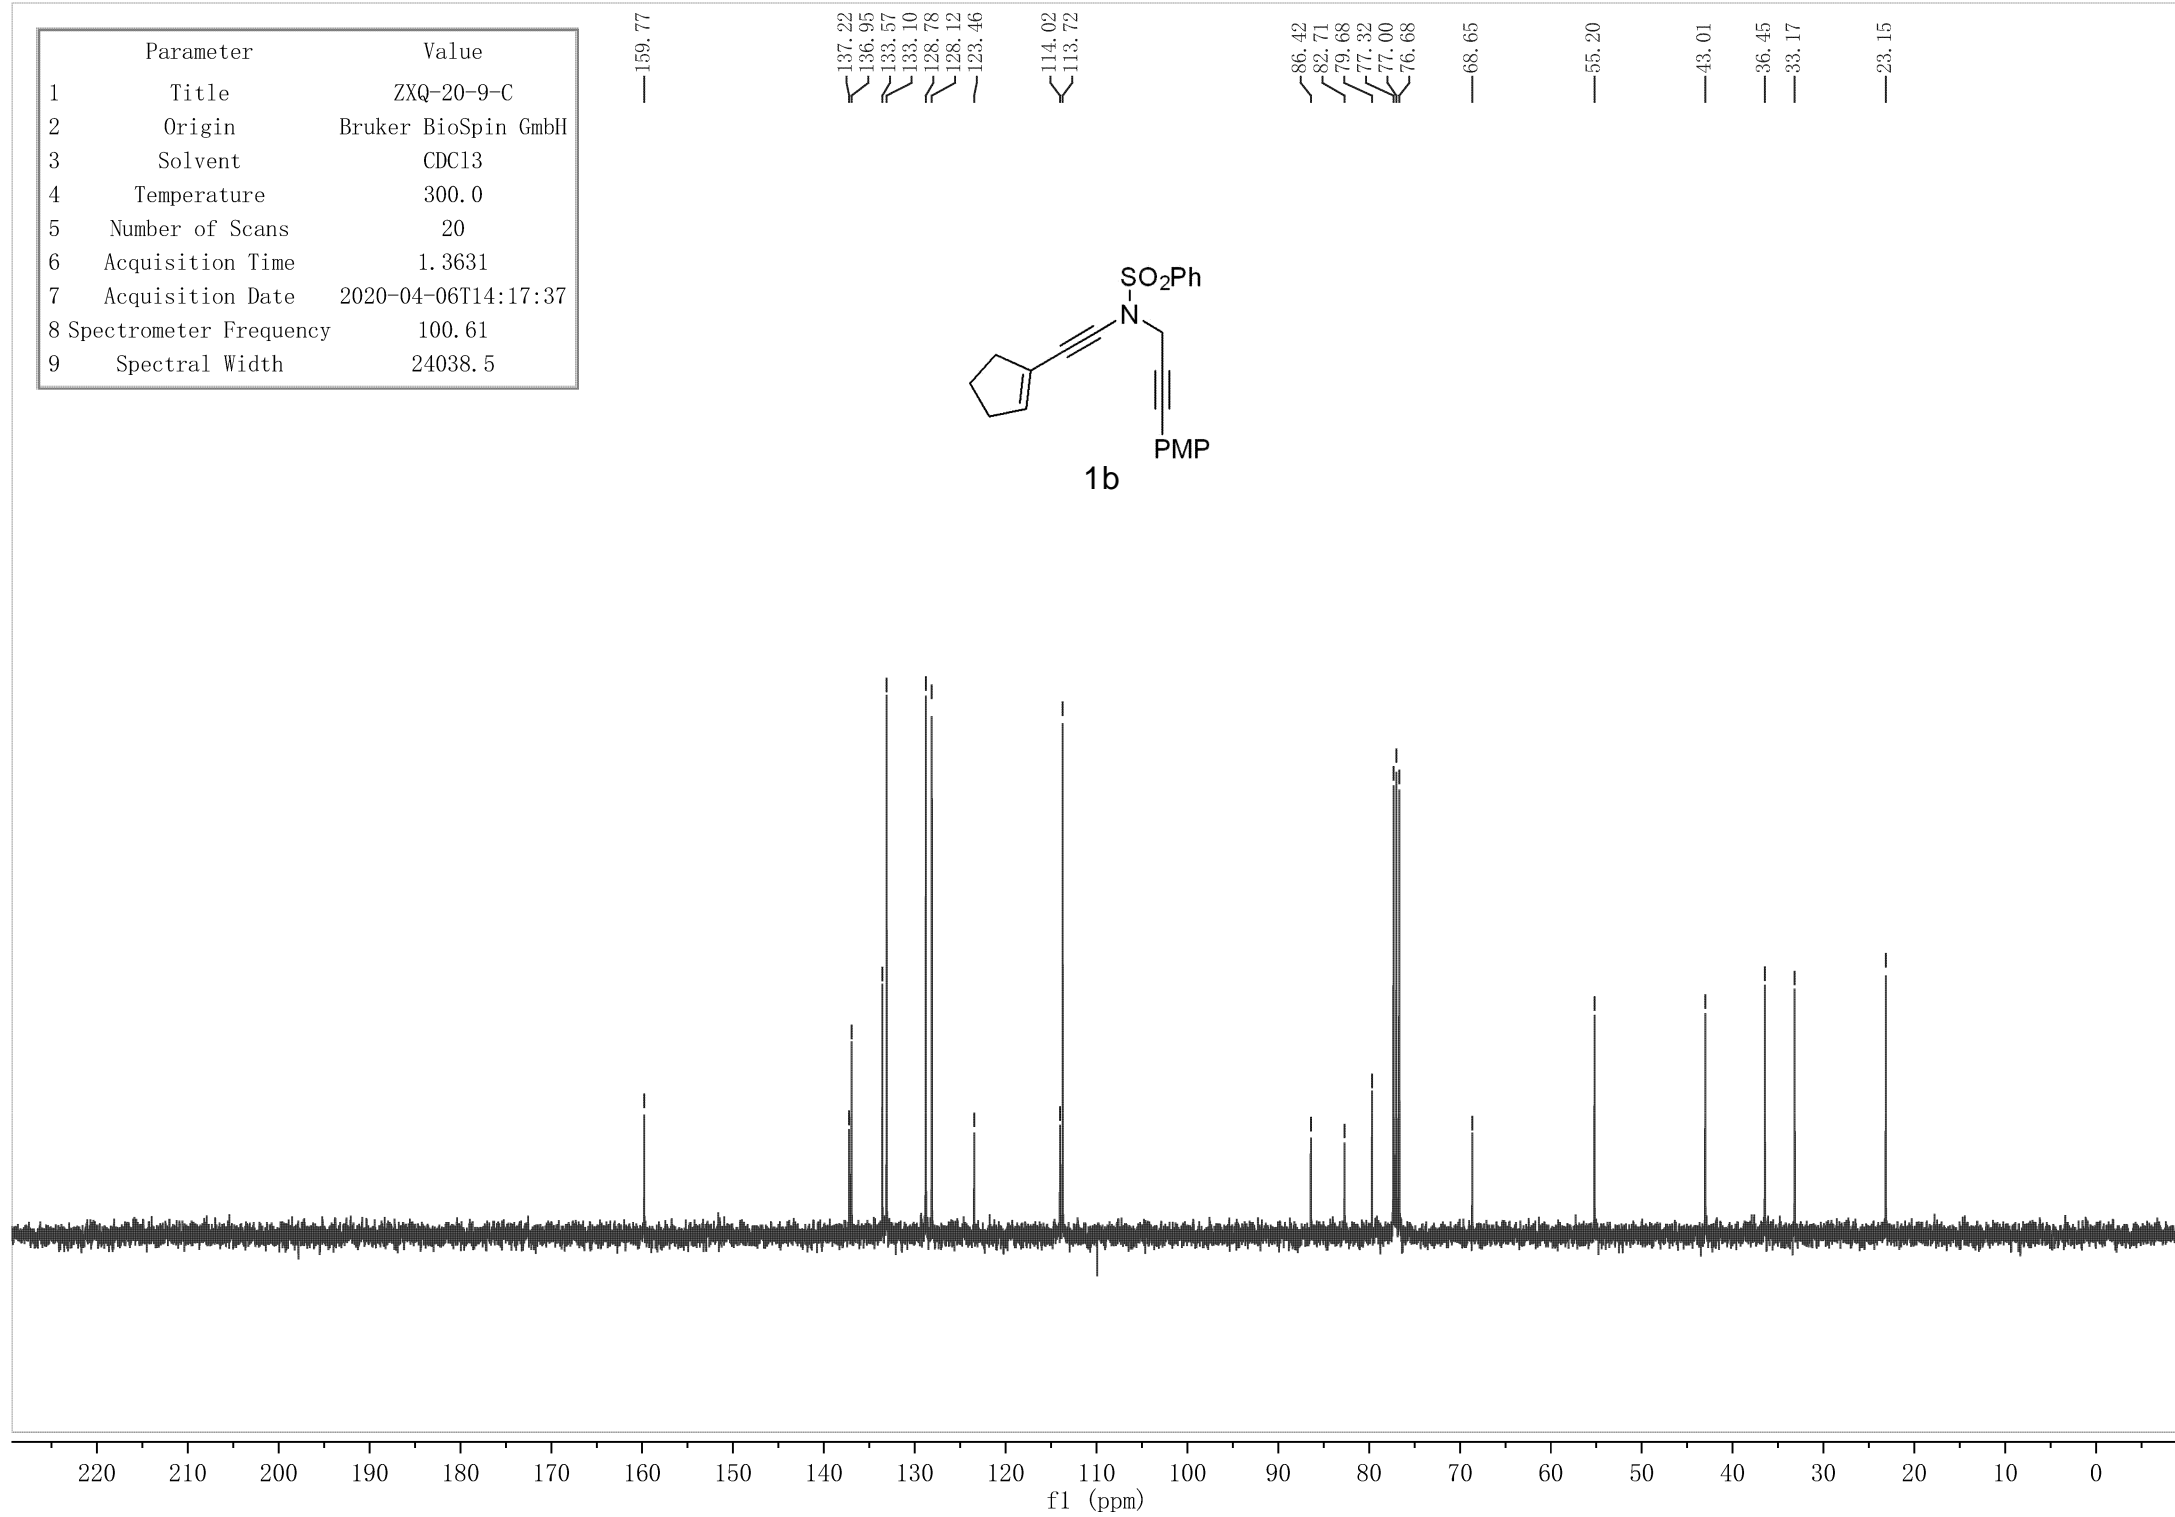



163.68  
 159.75  
 136.69  
 133.12  
 130.43  
 128.80  
 123.60  
 114.22  
 113.96  
 113.72  
 86.29  
 83.13  
 79.95  
 77.32  
 77.00  
 76.68  
 68.54  
 55.52  
 55.25  
 42.92  
 36.50  
 33.18  
 23.18

| Parameter                | Value               |
|--------------------------|---------------------|
| 1 Title                  | ZXQ-20-202-C        |
| 2 Origin                 | Bruker BioSpin GmbH |
| 3 Solvent                | CDC13               |
| 4 Temperature            | 299.4               |
| 5 Number of Scans        | 49                  |
| 6 Acquisition Time       | 1.3631              |
| 7 Acquisition Date       | 2020-05-19T14:09:07 |
| 8 Spectrometer Frequency | 100.59              |
| 9 Spectral Width         | 24038.5             |

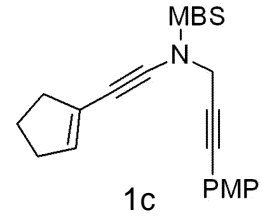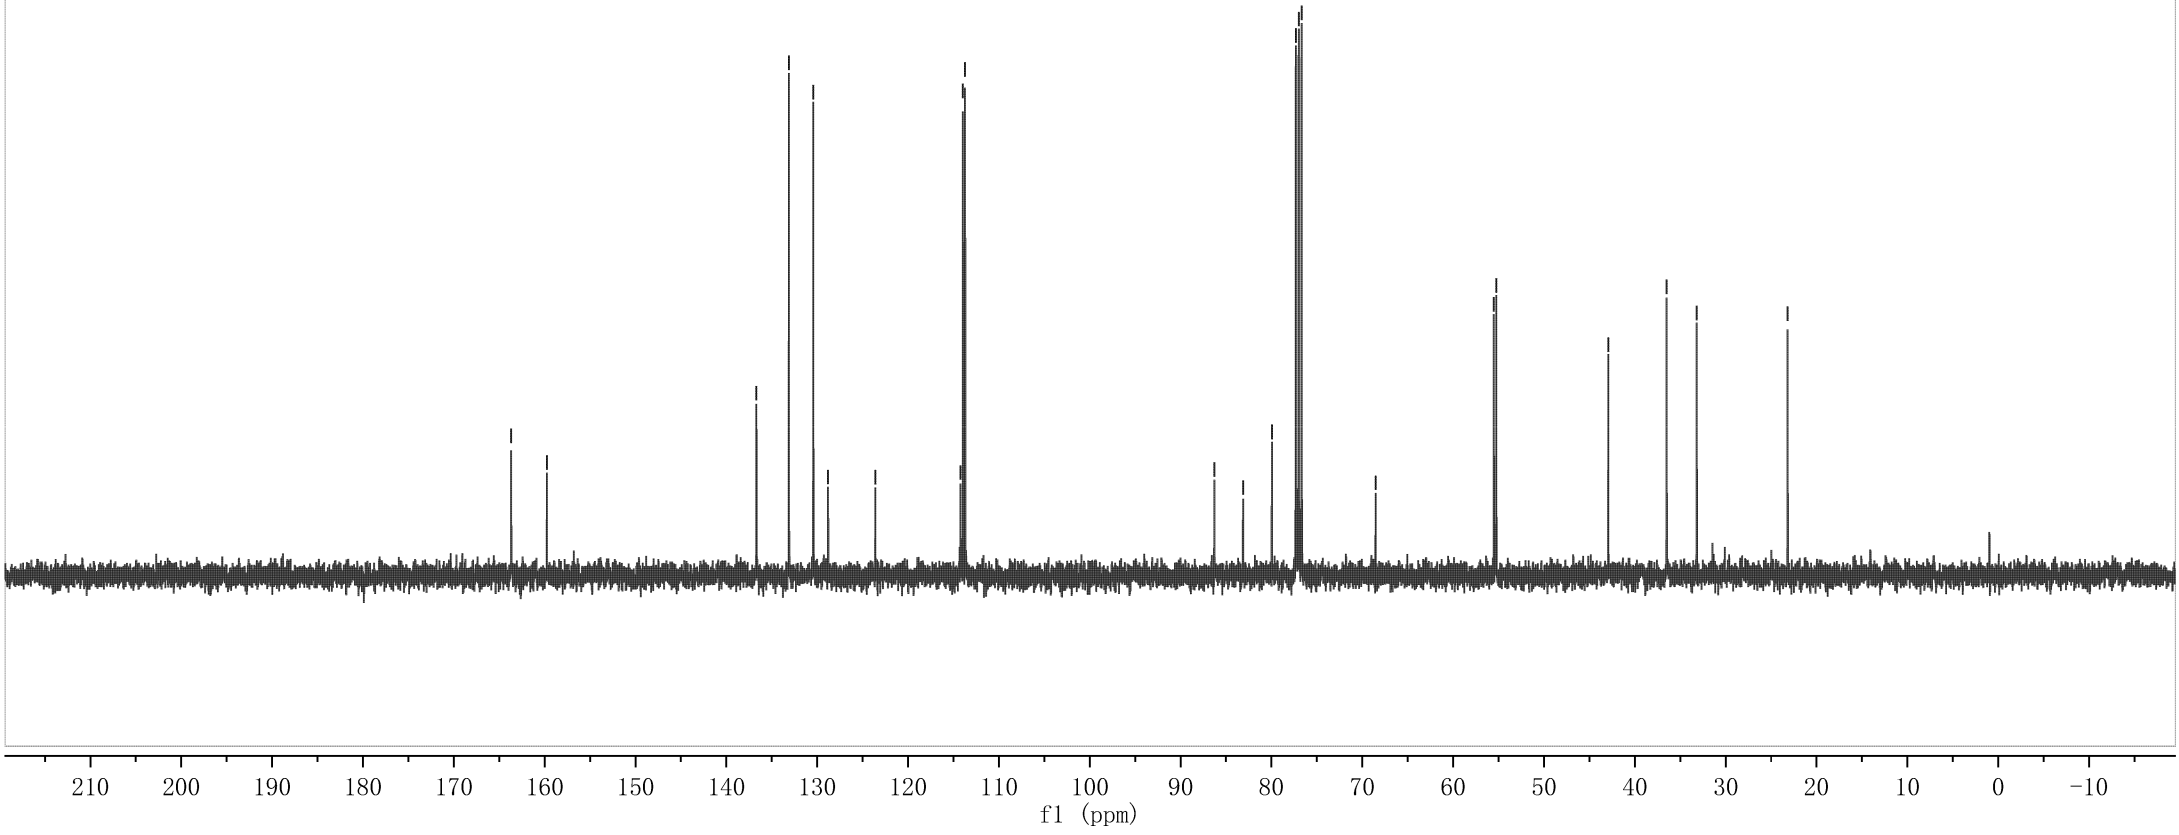

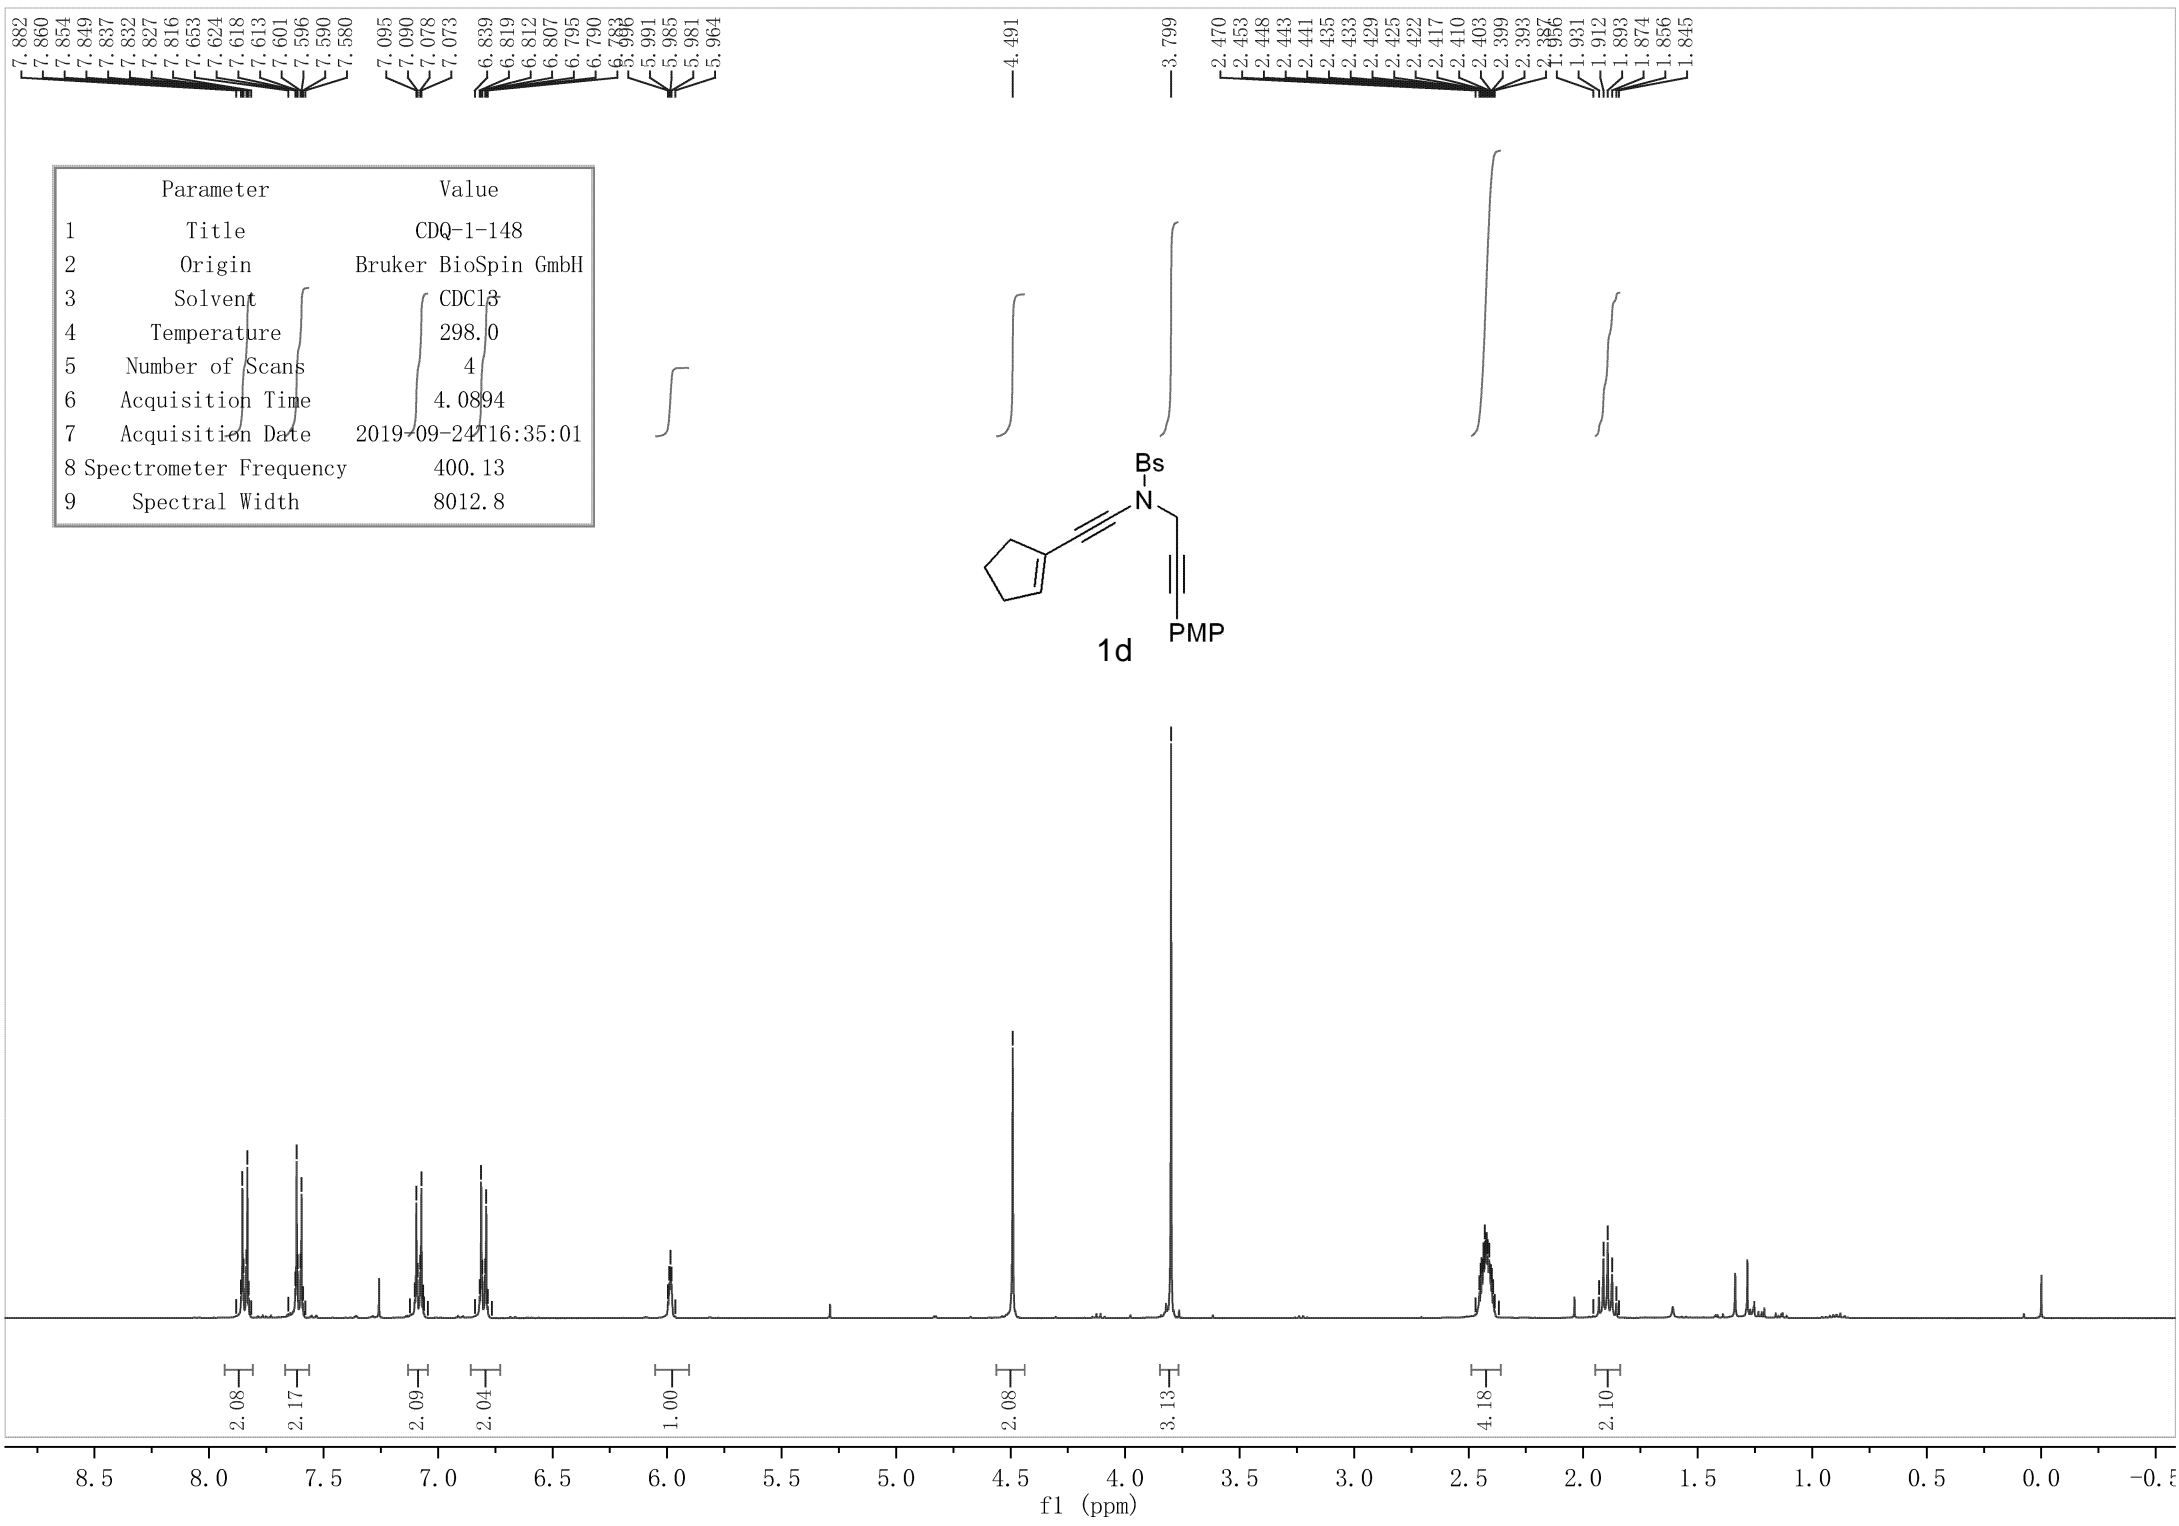

| Parameter                | Value               |
|--------------------------|---------------------|
| 1 Title                  | ZXQ-18-189-C        |
| 2 Origin                 | Bruker BioSpin GmbH |
| 3 Solvent                | CDC13               |
| 4 Temperature            | 300.0               |
| 5 Number of Scans        | 34                  |
| 6 Acquisition Time       | 1.3631              |
| 7 Acquisition Date       | 2019-10-28T15:11:19 |
| 8 Spectrometer Frequency | 100.61              |
| 9 Spectral Width         | 24038.5             |

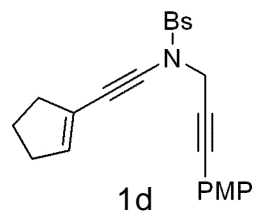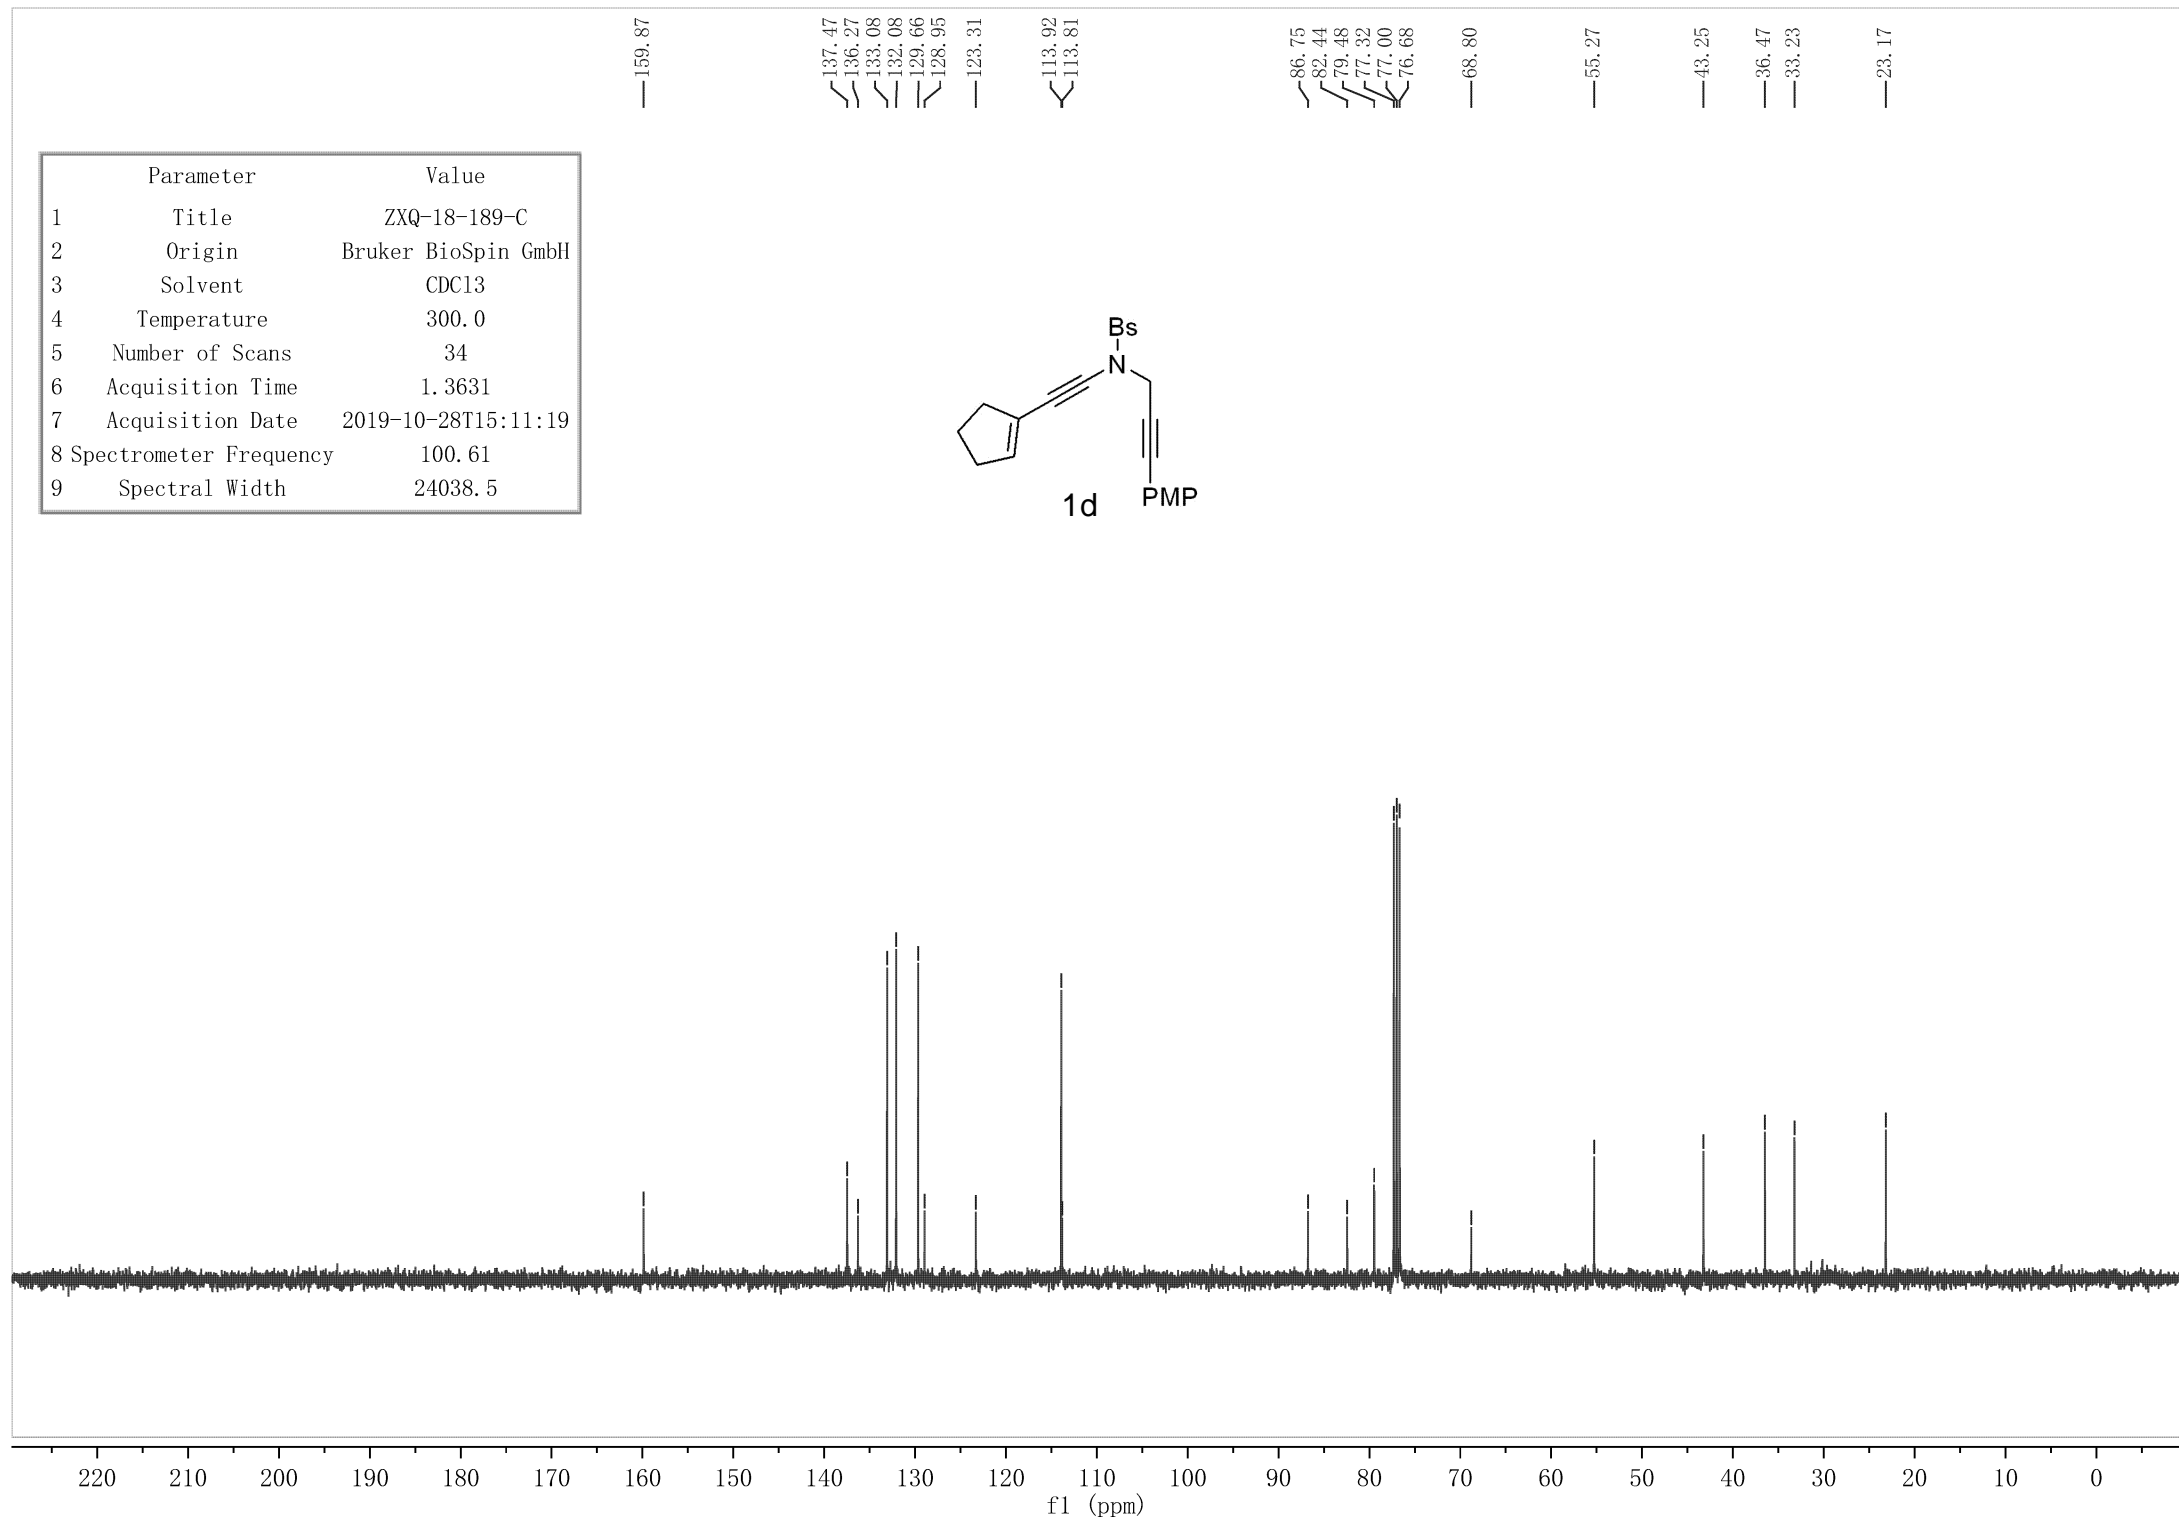

8.547  
 7.991  
 7.970  
 7.901  
 7.880  
 7.845  
 7.825  
 7.827  
 7.610  
 7.590  
 7.590  
 7.563  
 7.544  
 7.536  
 6.808  
 6.600  
 6.578  
 6.033  
 5.954  
 5.900  
 4.533  
 3.716  
 2.480  
 2.433  
 2.415  
 2.408  
 2.400  
 2.395  
 2.389  
 2.382  
 2.364  
 2.314  
 1.918  
 1.894  
 1.875  
 1.856  
 1.837  
 1.819  
 1.767

| Parameter                | Value               |
|--------------------------|---------------------|
| 1 Title                  | ZXQ-18-188          |
| 2 Origin                 | Bruker BioSpin GmbH |
| 3 Solvent                | CDC13               |
| 4 Temperature            | 298.0               |
| 5 Number of Scans        | 8                   |
| 6 Acquisition Time       | 4.0894              |
| 7 Acquisition Date       | 2019-10-28T15:00:10 |
| 8 Spectrometer Frequency | 400.13              |
| 9 Spectral Width         | 8012.8              |

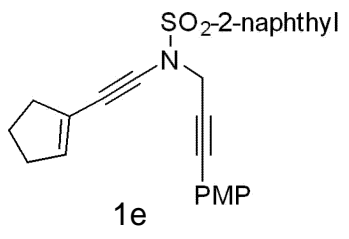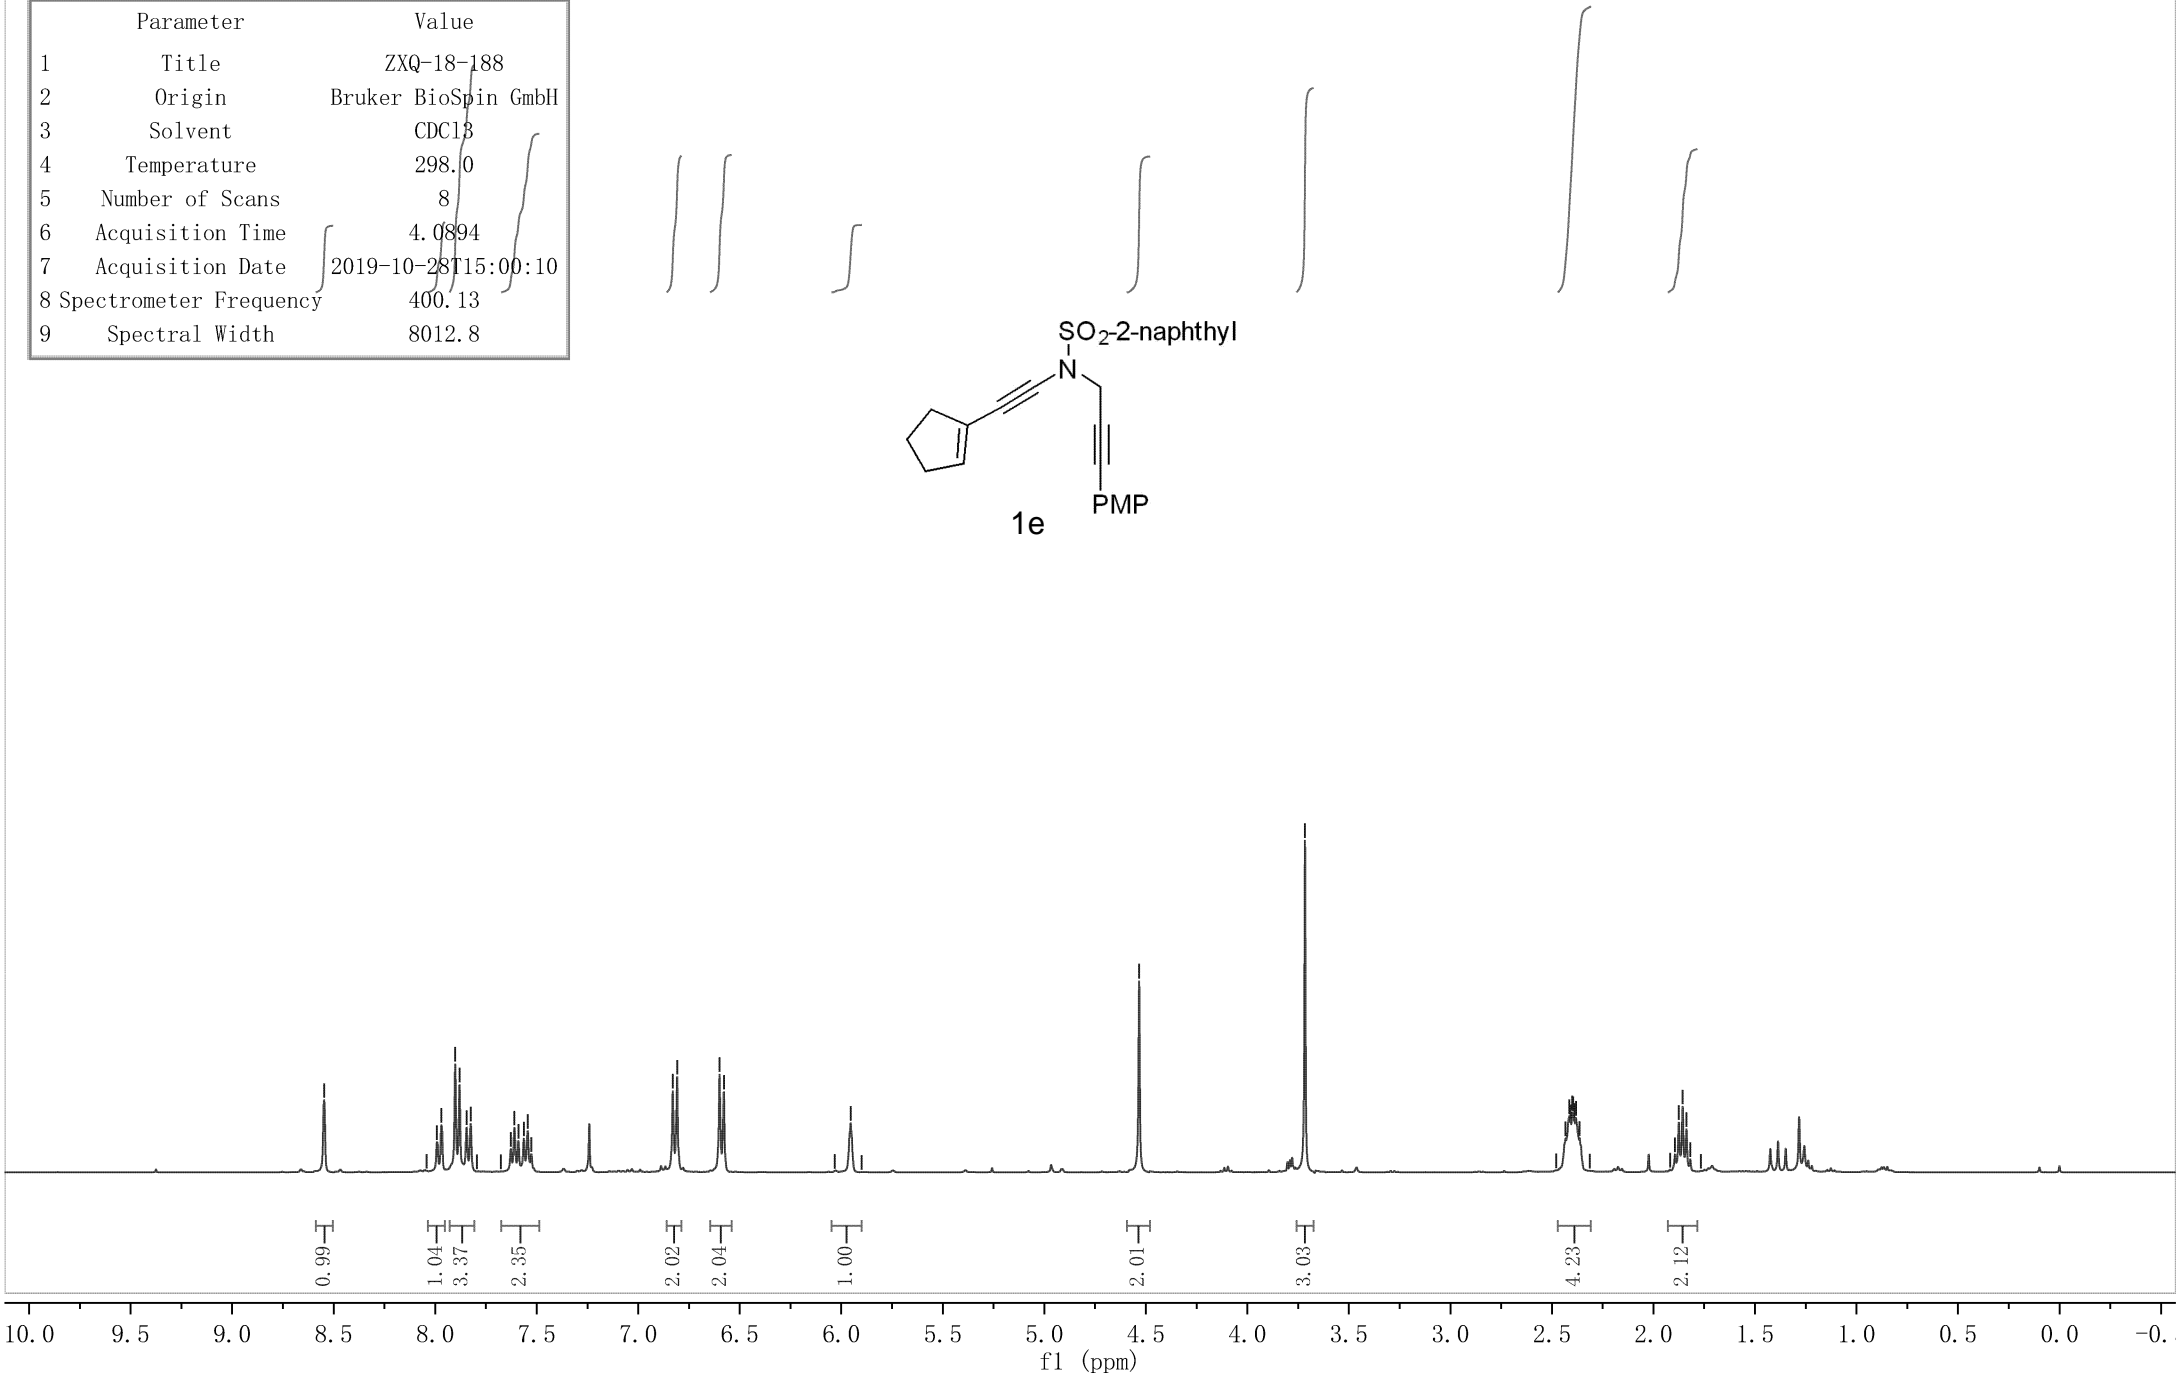



| Parameter                | Value               |
|--------------------------|---------------------|
| 1 Title                  | ZXQ-18-188-C-1      |
| 2 Origin                 | Bruker BioSpin GmbH |
| 3 Solvent                | CDC13               |
| 4 Temperature            | 300.0               |
| 5 Number of Scans        | 9                   |
| 6 Acquisition Time       | 1.3631              |
| 7 Acquisition Date       | 2019-10-28T15:04:06 |
| 8 Spectrometer Frequency | 100.61              |
| 9 Spectral Width         | 24038.5             |

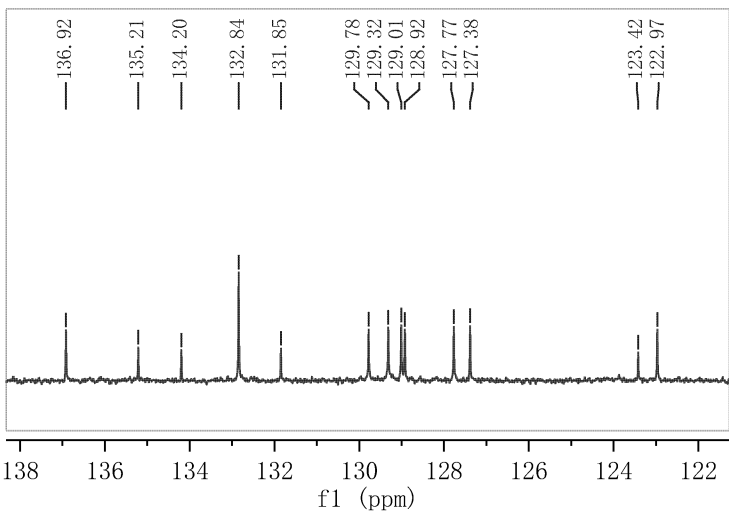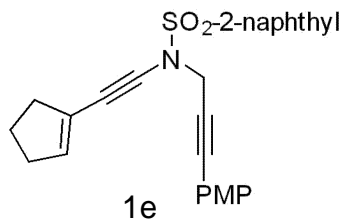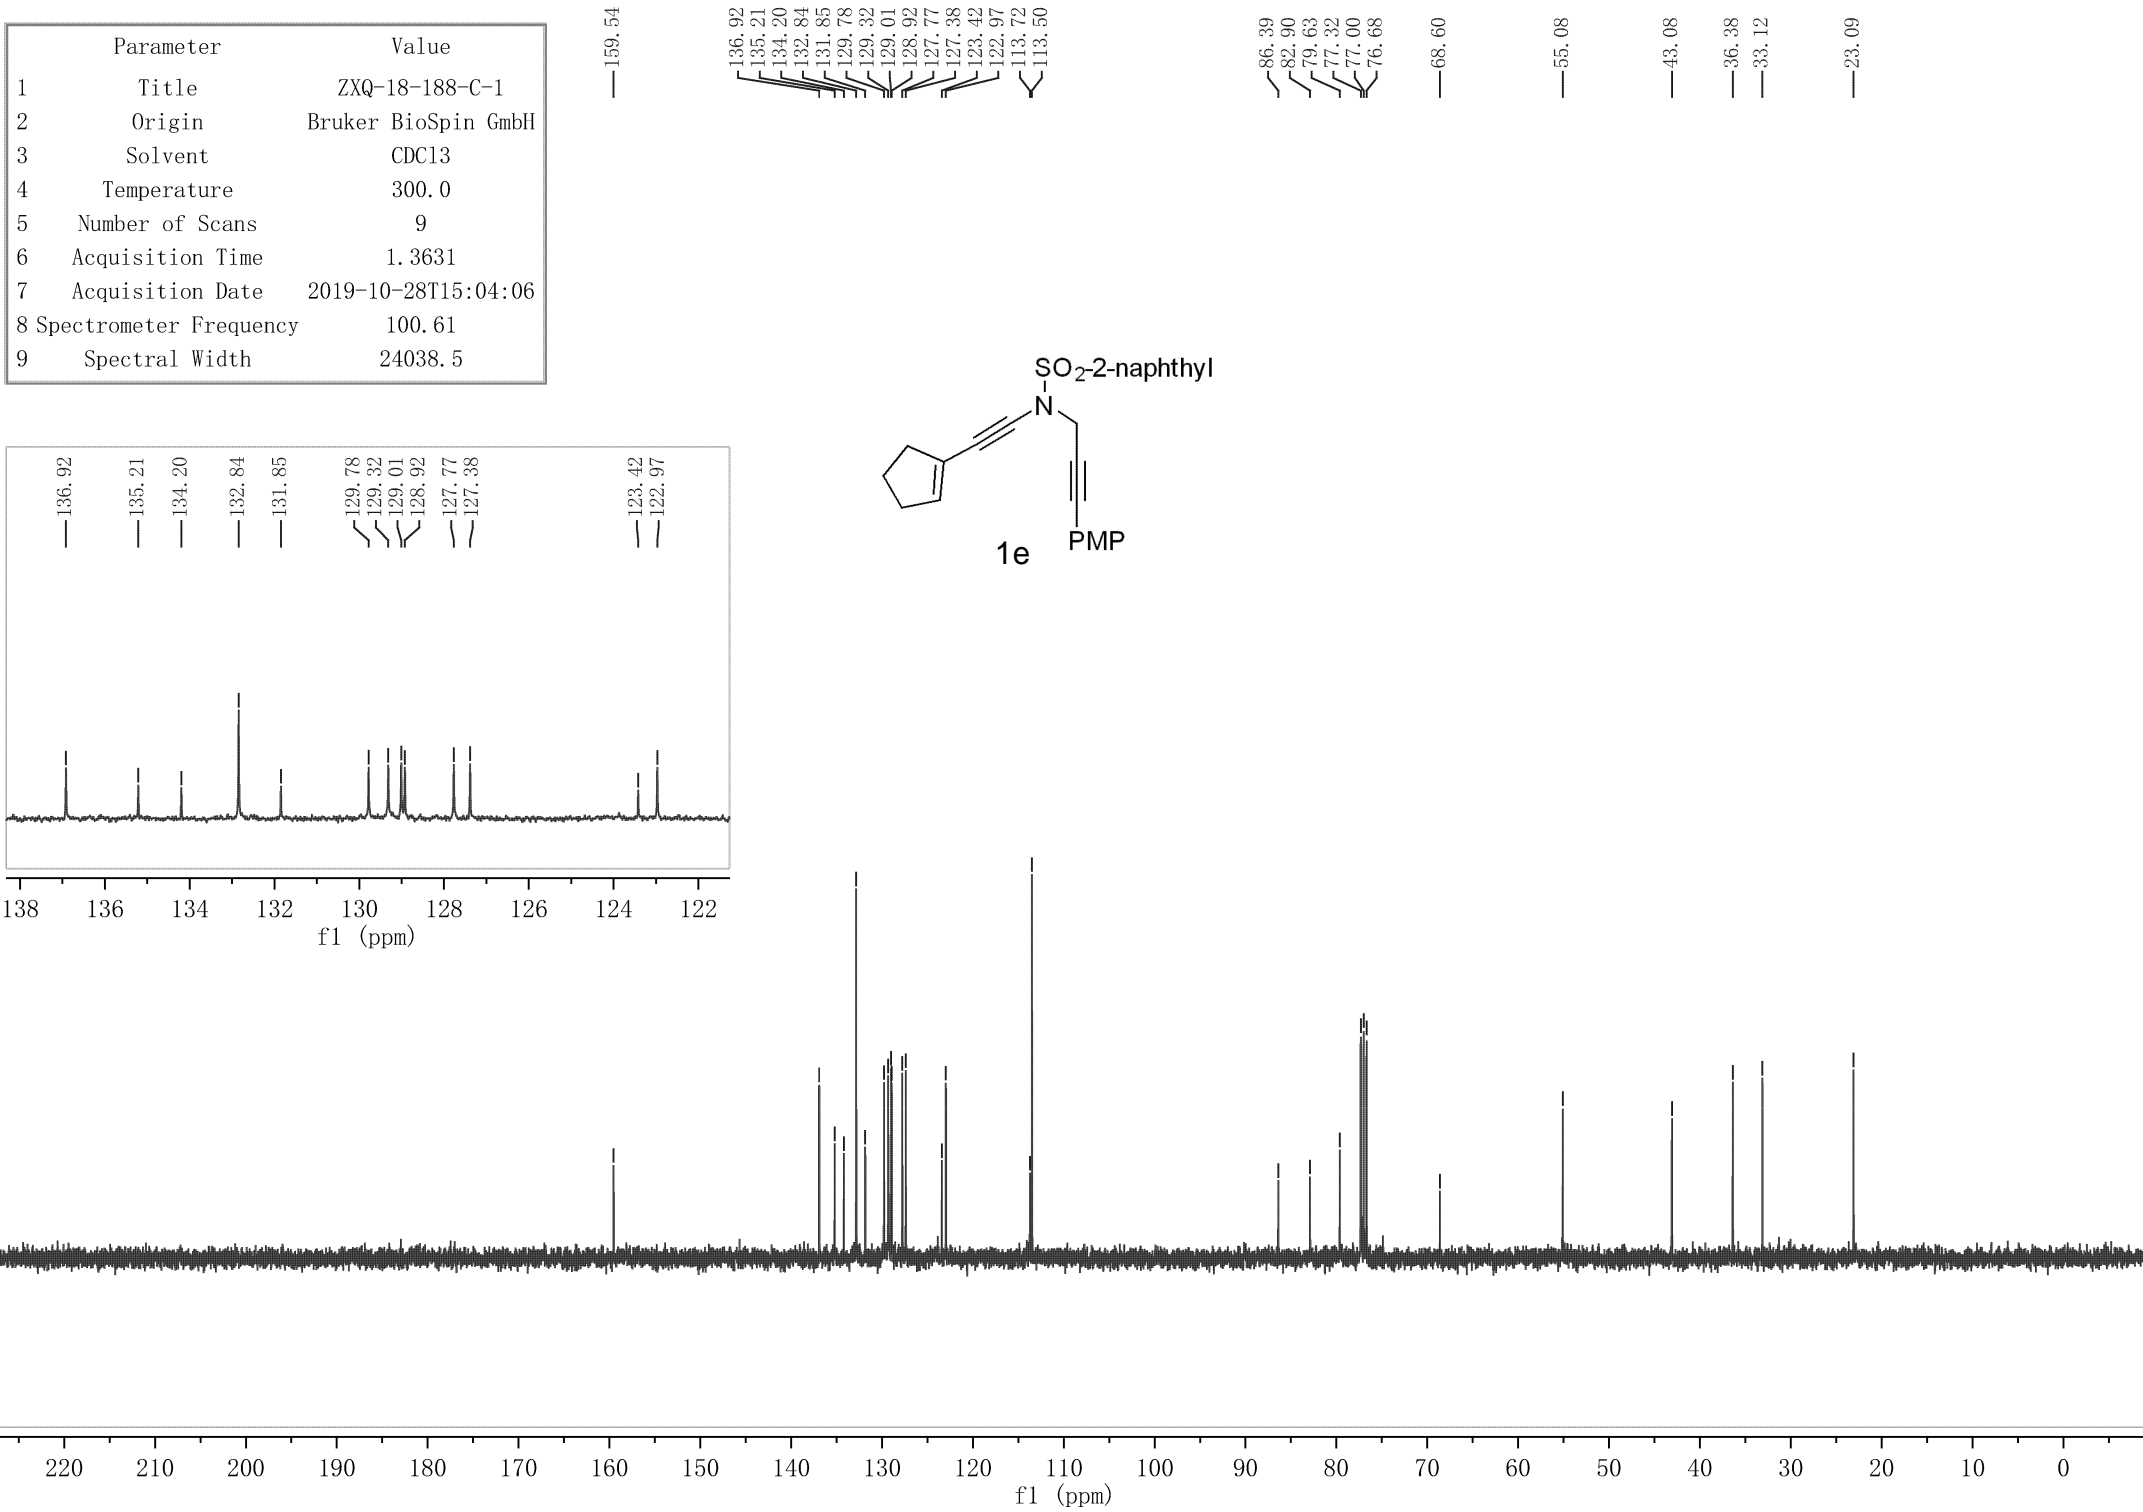

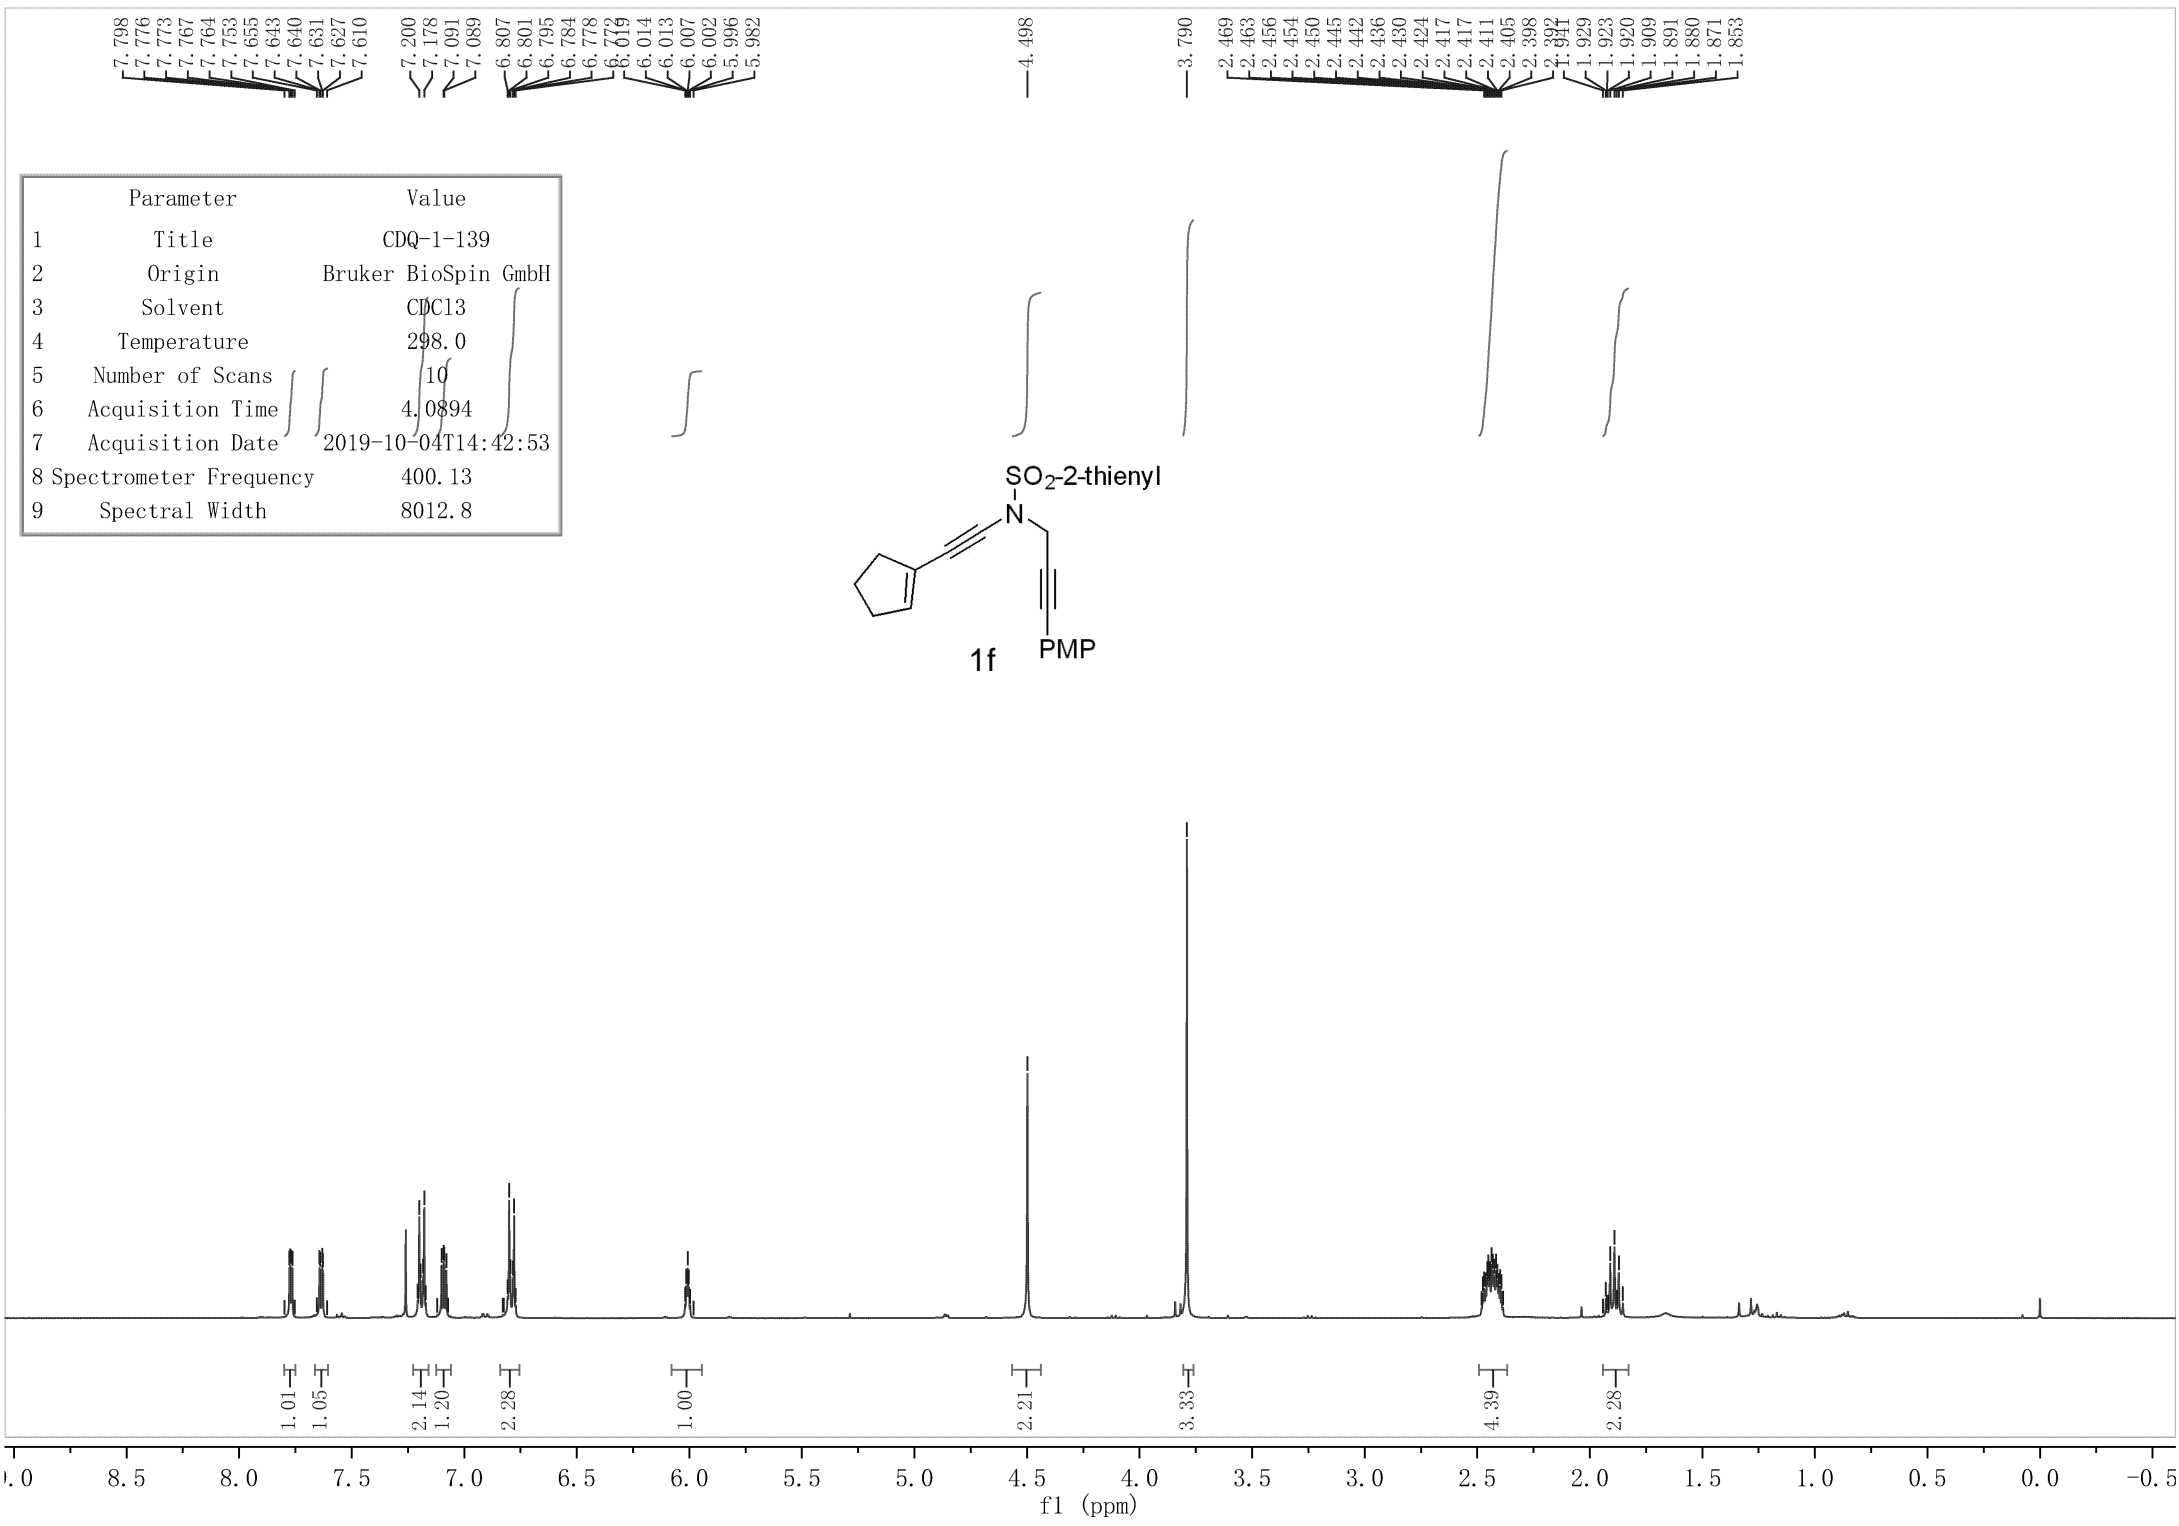

| Parameter                | Value               |
|--------------------------|---------------------|
| 1 Title                  | CDQ-1-139-C         |
| 2 Origin                 | Bruker BioSpin GmbH |
| 3 Solvent                | CDC13               |
| 4 Temperature            | 300.0               |
| 5 Number of Scans        | 20                  |
| 6 Acquisition Time       | 1.3631              |
| 7 Acquisition Date       | 2019-10-04T14:45:45 |
| 8 Spectrometer Frequency | 100.61              |
| 9 Spectral Width         | 24038.5             |

159.80  
 137.37  
 136.61  
 133.99  
 133.52  
 133.15  
 127.30  
 123.38  
 114.06  
 113.78  
 86.50  
 82.19  
 79.30  
 77.32  
 77.00  
 76.68  
 69.50  
 55.23  
 43.22  
 36.48  
 33.21  
 23.16

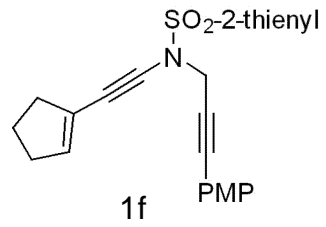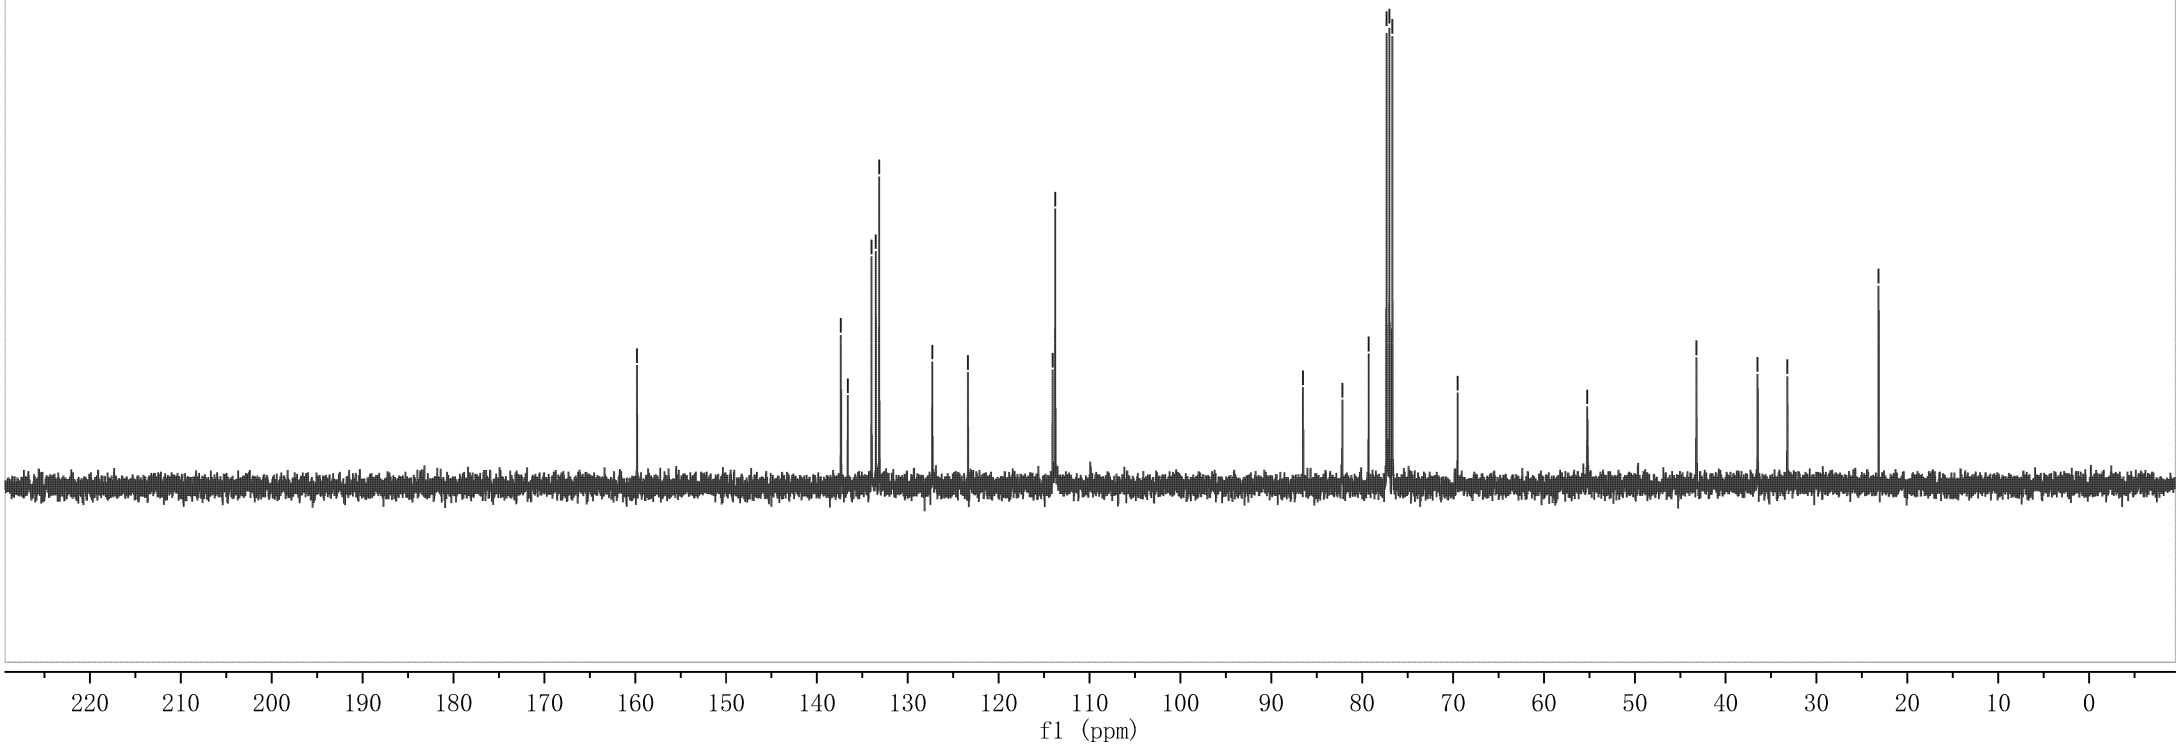

| Parameter                | Value               |
|--------------------------|---------------------|
| 1 Title                  | ZXQ-19-66           |
| 2 Origin                 | Bruker BioSpin GmbH |
| 3 Solvent                | CDCl3               |
| 4 Temperature            | 301.5               |
| 5 Number of Scans        | 11                  |
| 6 Acquisition Time       | 3.9846              |
| 7 Acquisition Date       | 2019-11-27T14:01:03 |
| 8 Spectrometer Frequency | 400.03              |
| 9 Spectral Width         | 8223.7              |

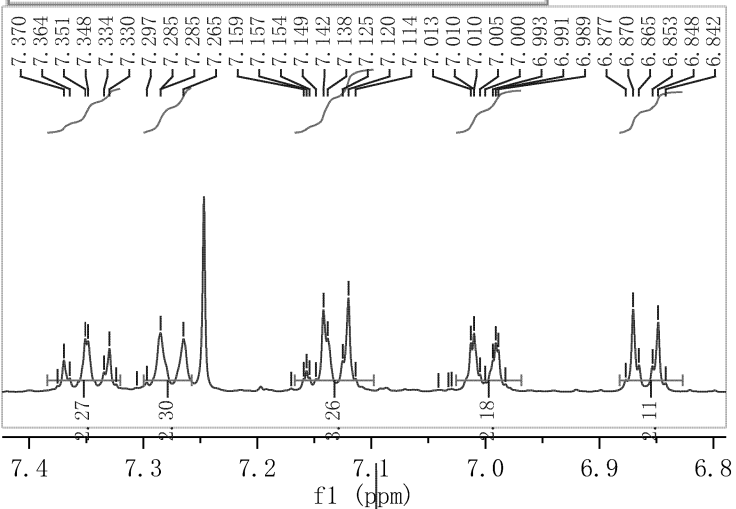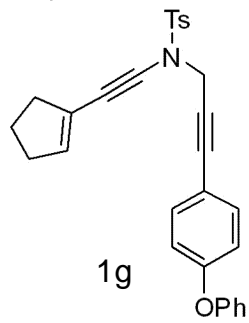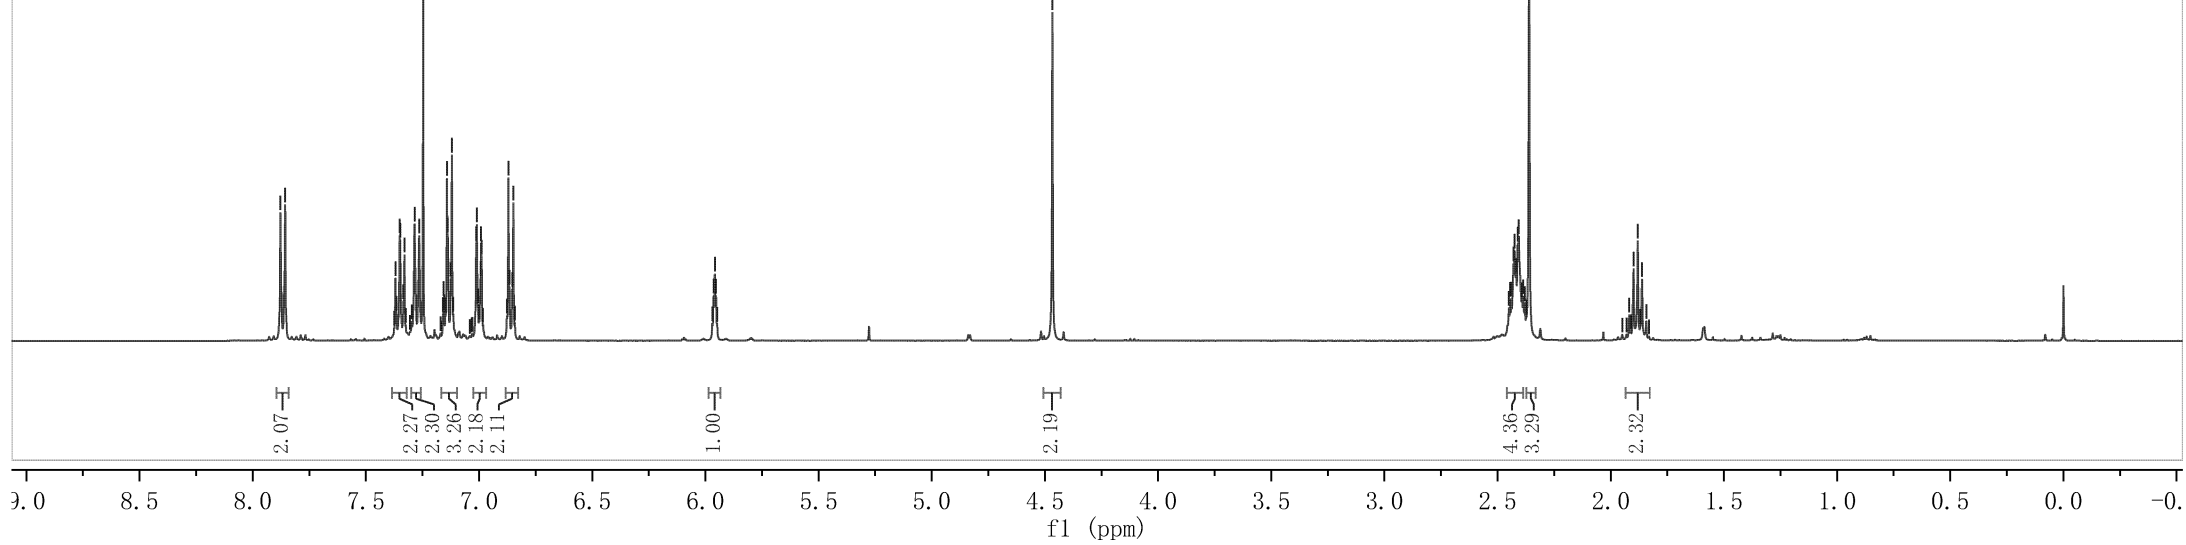

7.878  
7.857  
7.351  
7.348  
7.330  
7.285  
7.265  
7.142  
7.138  
7.120  
7.013  
7.010  
7.010  
6.991  
6.989  
6.870  
6.869  
6.863  
5.958  
5.953  
5.948

4.467

2.450  
2.444  
2.439  
2.430  
2.425  
2.418  
2.411  
2.406  
2.392  
2.387  
2.380  
2.373  
2.361  
1.949  
1.930  
1.919  
1.912  
1.899  
1.881  
1.870  
1.862  
1.843  
1.831

| Parameter                | Value               |
|--------------------------|---------------------|
| 1 Title                  | ZXQ-19-66-C         |
| 2 Origin                 | Bruker BioSpin GmbH |
| 3 Solvent                | CDC13               |
| 4 Temperature            | 301.7               |
| 5 Number of Scans        | 30                  |
| 6 Acquisition Time       | 1.3631              |
| 7 Acquisition Date       | 2019-11-27T14:03:58 |
| 8 Spectrometer Frequency | 100.59              |
| 9 Spectral Width         | 24038.5             |

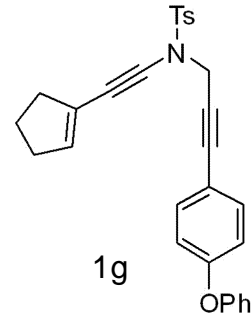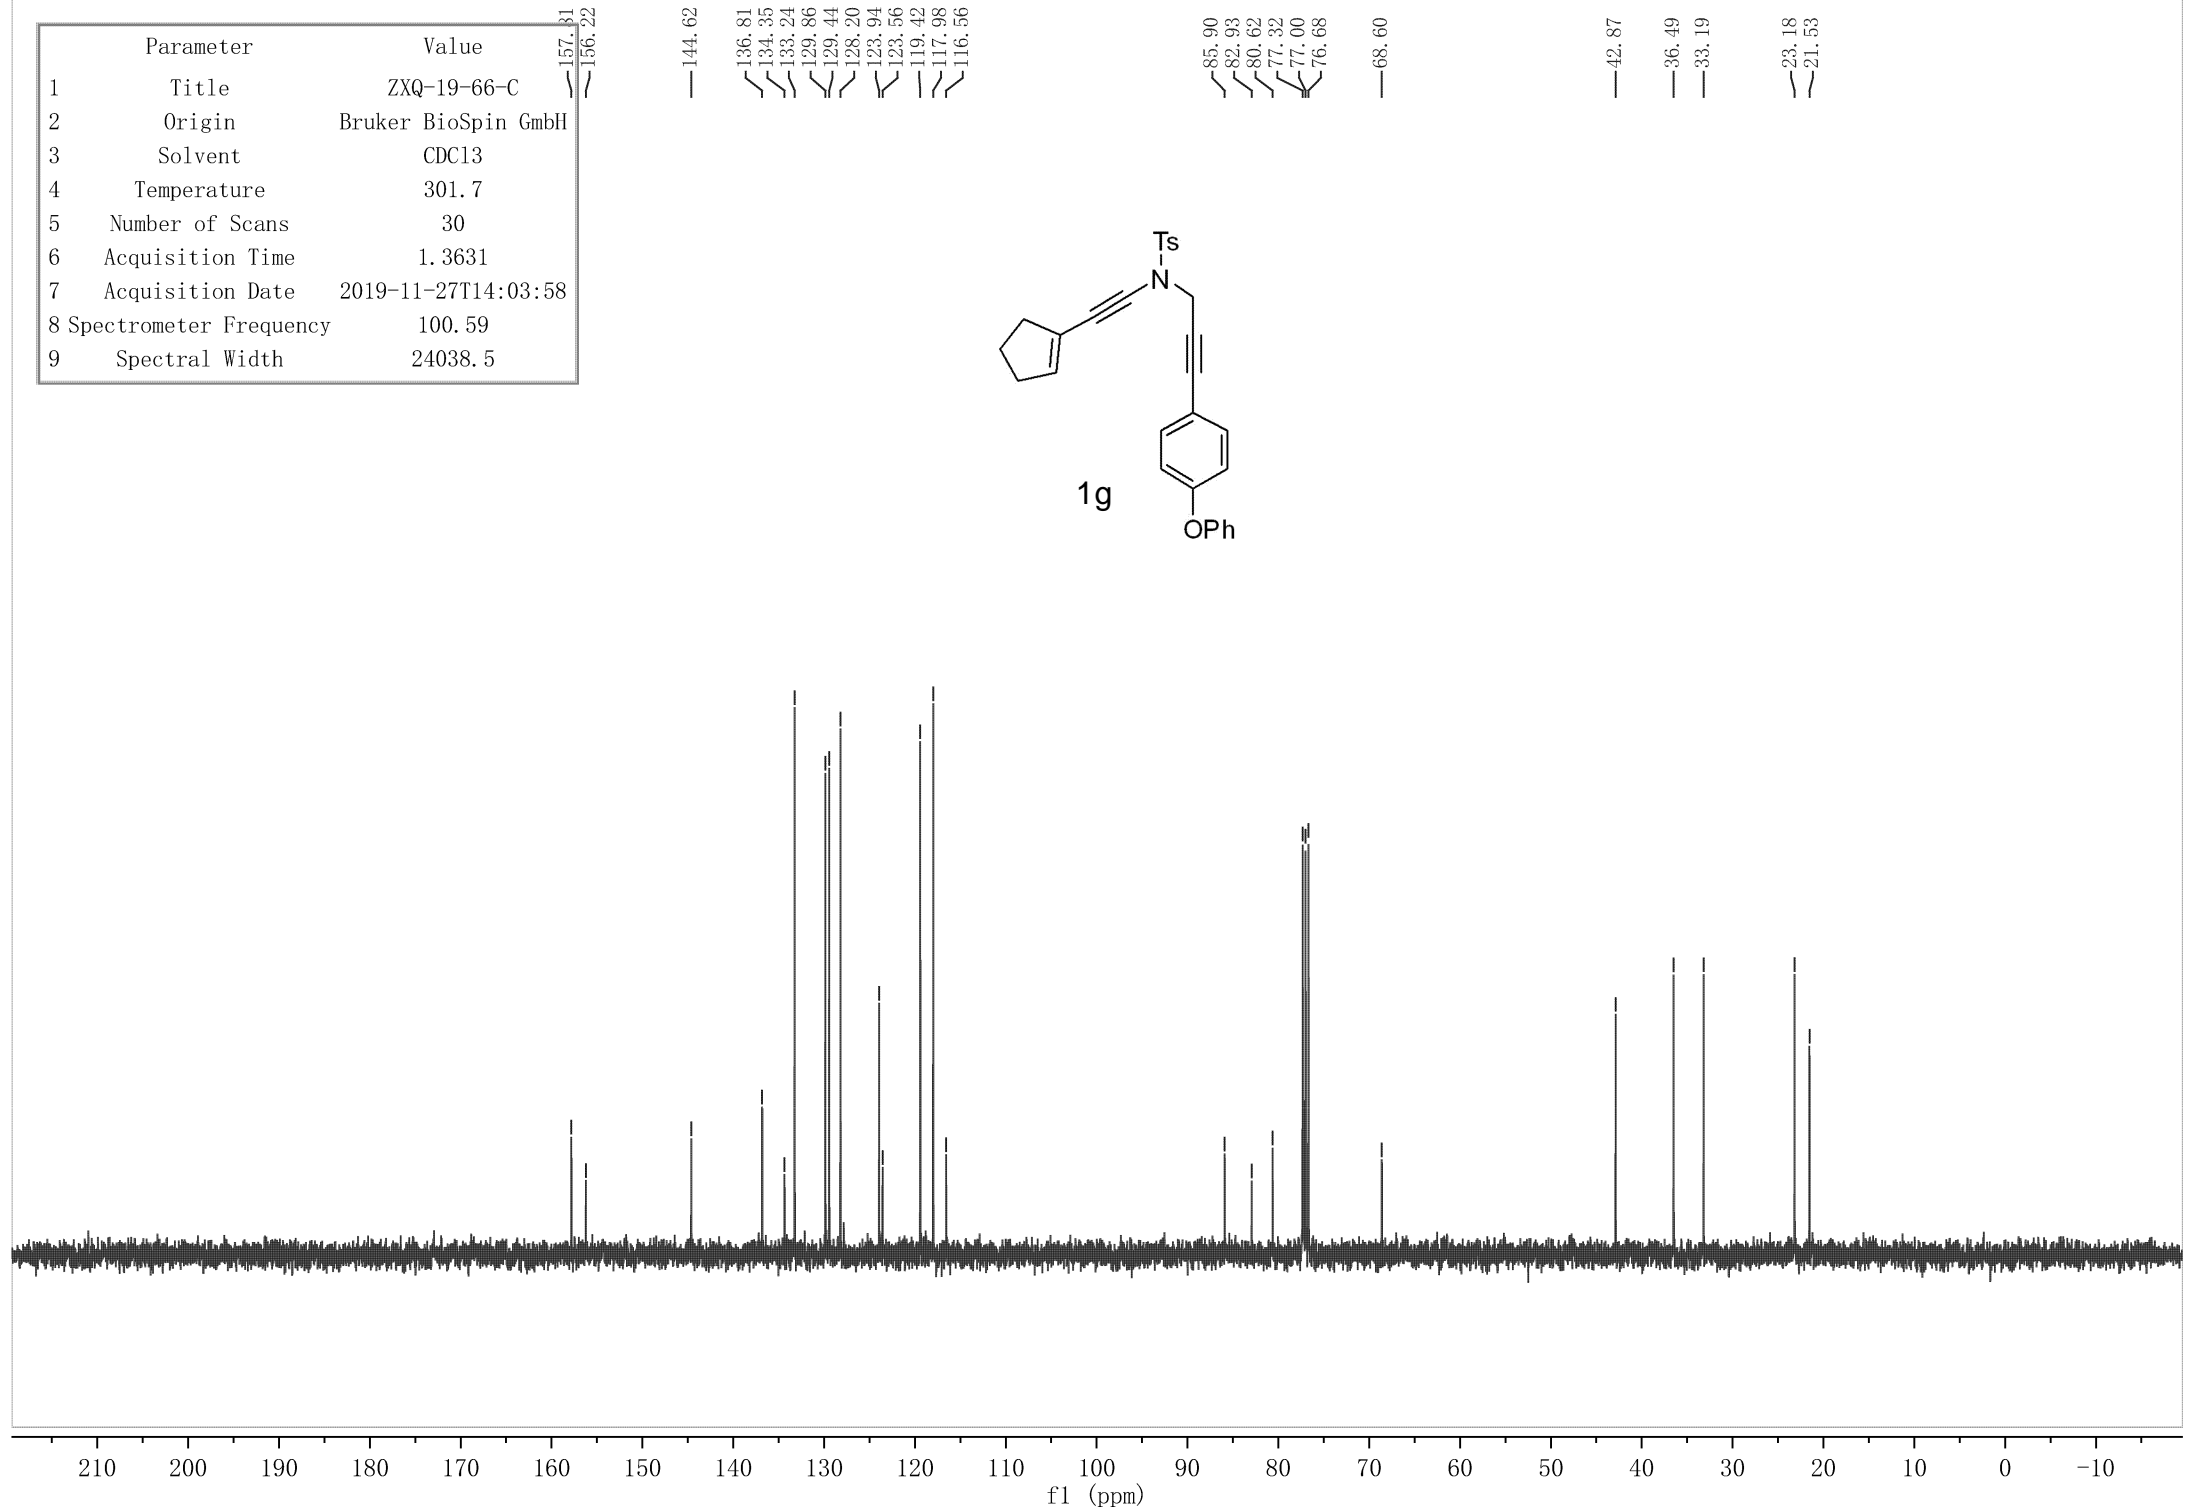

| Parameter                | Value               |
|--------------------------|---------------------|
| 1 Title                  | ZXQ-19-127          |
| 2 Origin                 | Bruker BioSpin GmbH |
| 3 Solvent                | CDC13               |
| 4 Temperature            | 298.0               |
| 5 Number of Scans        | 9                   |
| 6 Acquisition Time       | 4.0894              |
| 7 Acquisition Date       | 2019-12-13T16:24:24 |
| 8 Spectrometer Frequency | 400.13              |
| 9 Spectral Width         | 8012.8              |

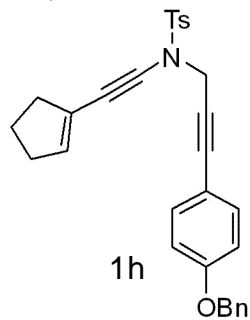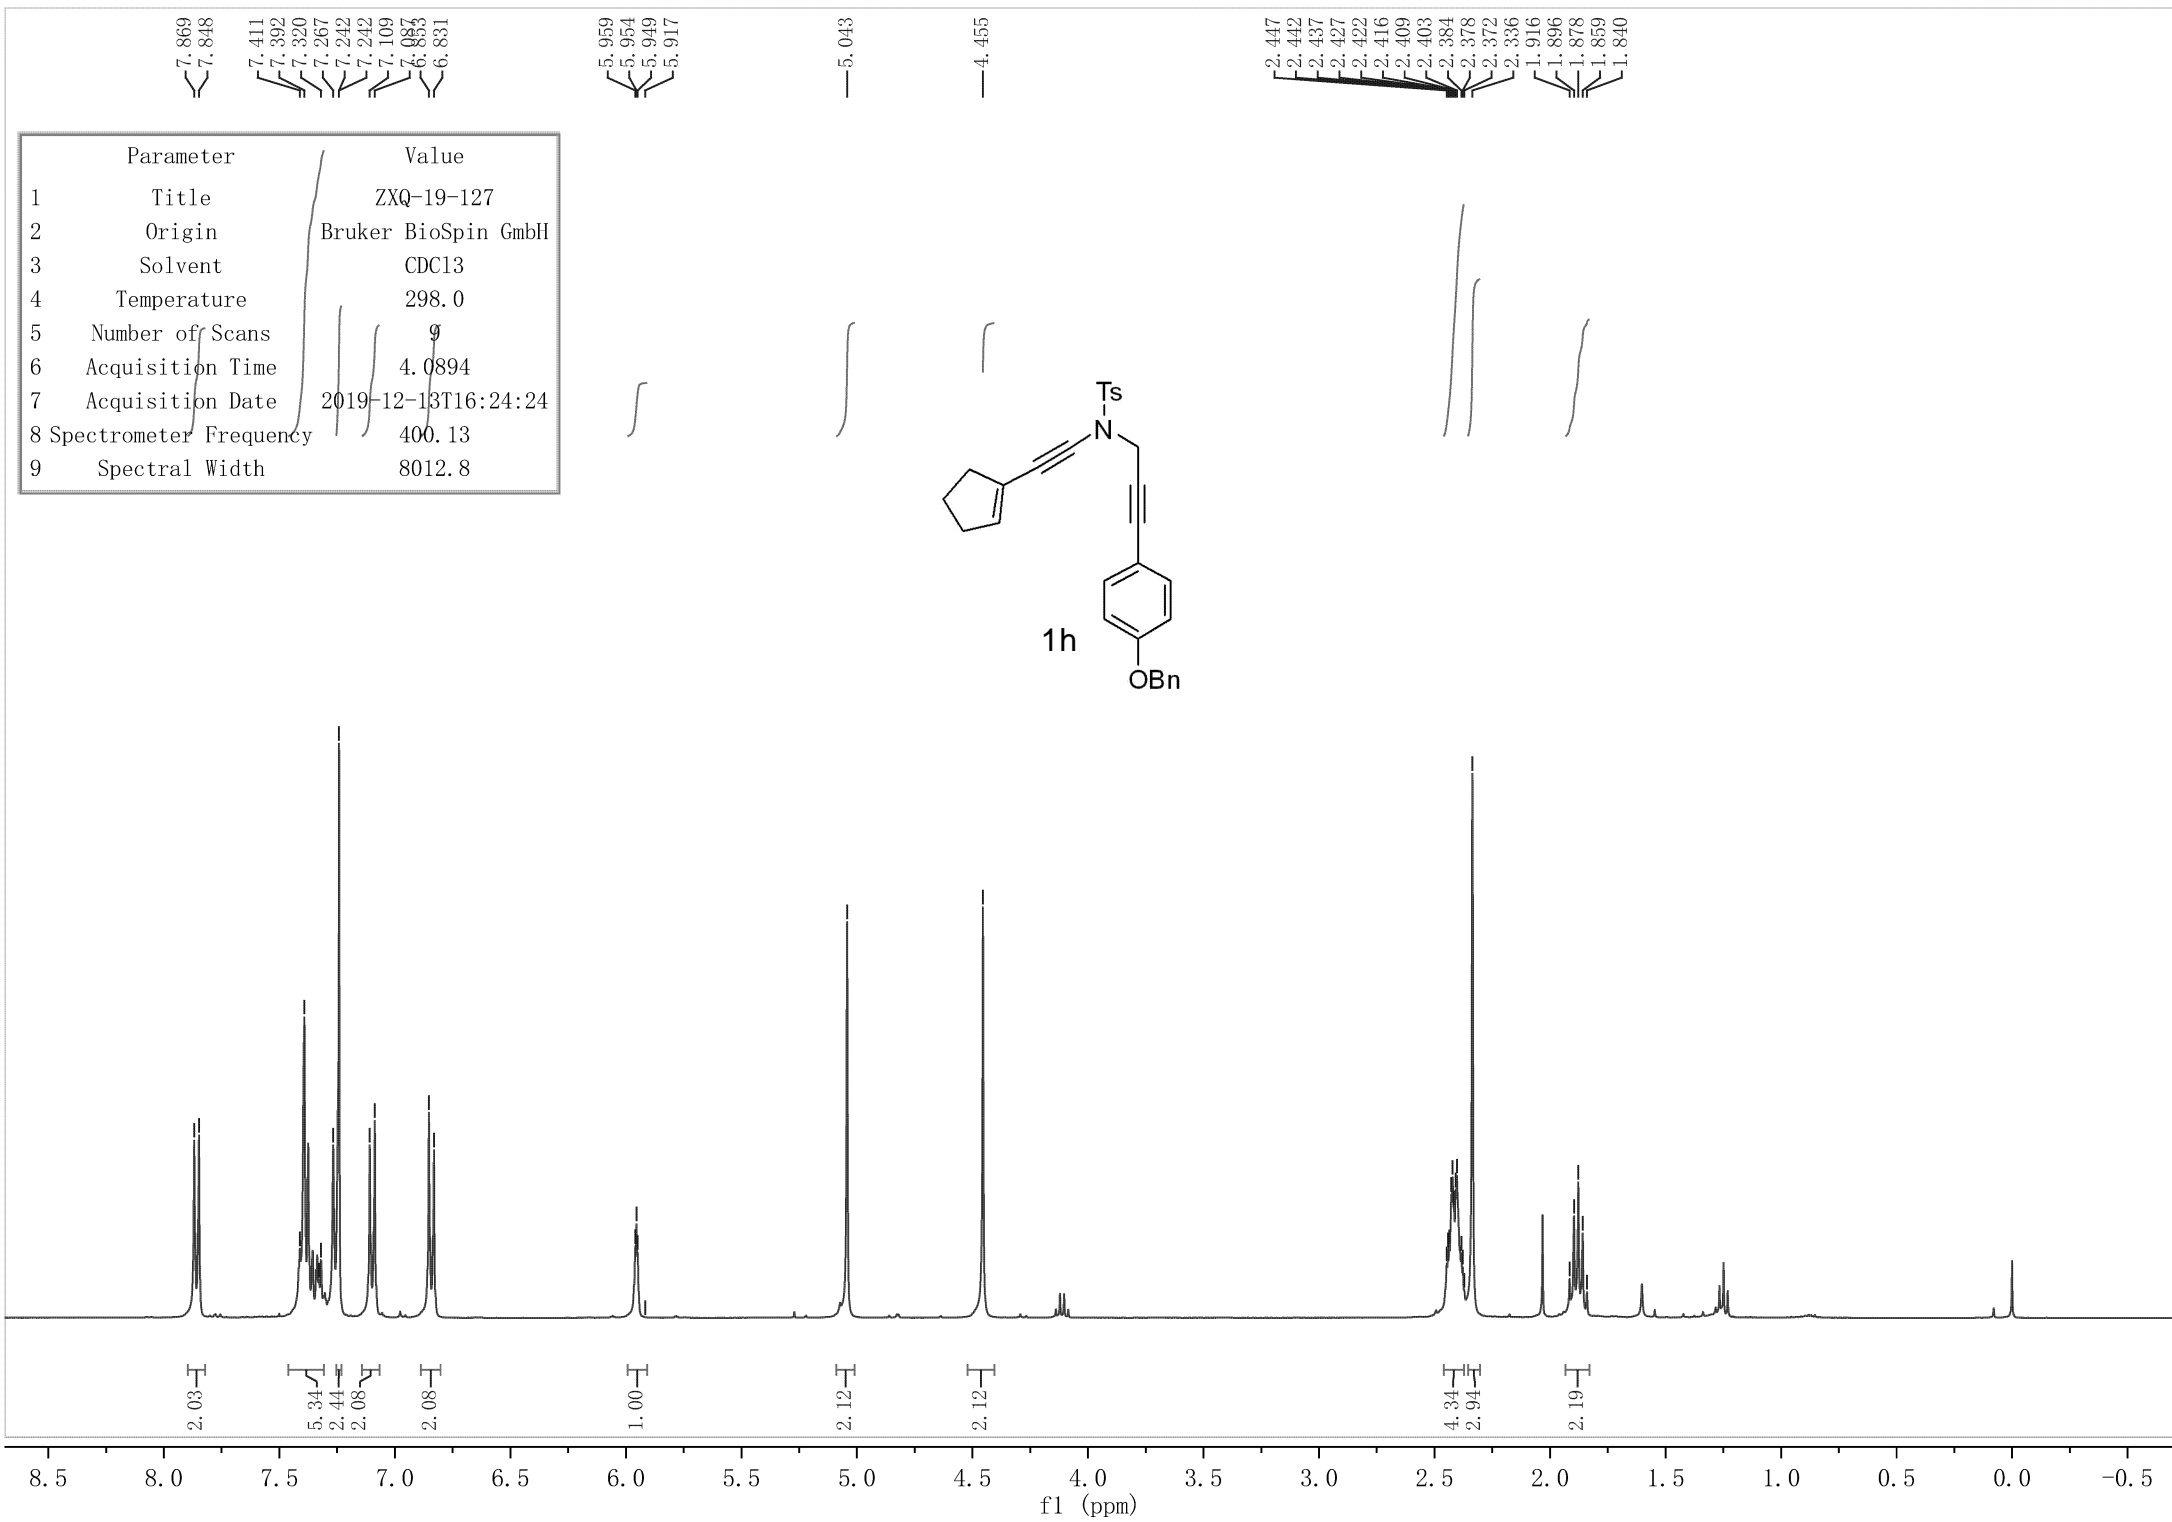

| Parameter                | Value               |
|--------------------------|---------------------|
| 1 Title                  | ZXQ-19-127-C        |
| 2 Origin                 | Bruker BioSpin GmbH |
| 3 Solvent                | CDC13               |
| 4 Temperature            | 300.0               |
| 5 Number of Scans        | 31                  |
| 6 Acquisition Time       | 1.3631              |
| 7 Acquisition Date       | 2019-12-13T16:25:48 |
| 8 Spectrometer Frequency | 100.61              |
| 9 Spectral Width         | 24038.5             |

158.85  
 144.60  
 136.76  
 136.43  
 134.30  
 133.09  
 129.41  
 128.57  
 128.16  
 128.05  
 127.36  
 123.55  
 114.61  
 114.43  
 86.23  
 82.95  
 79.90  
 77.32  
 77.00  
 76.68  
 69.94  
 68.52  
 42.93  
 36.47  
 33.17  
 23.16  
 21.52

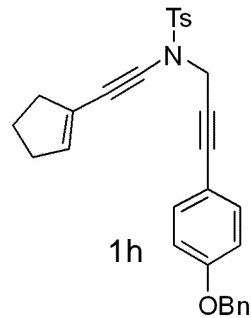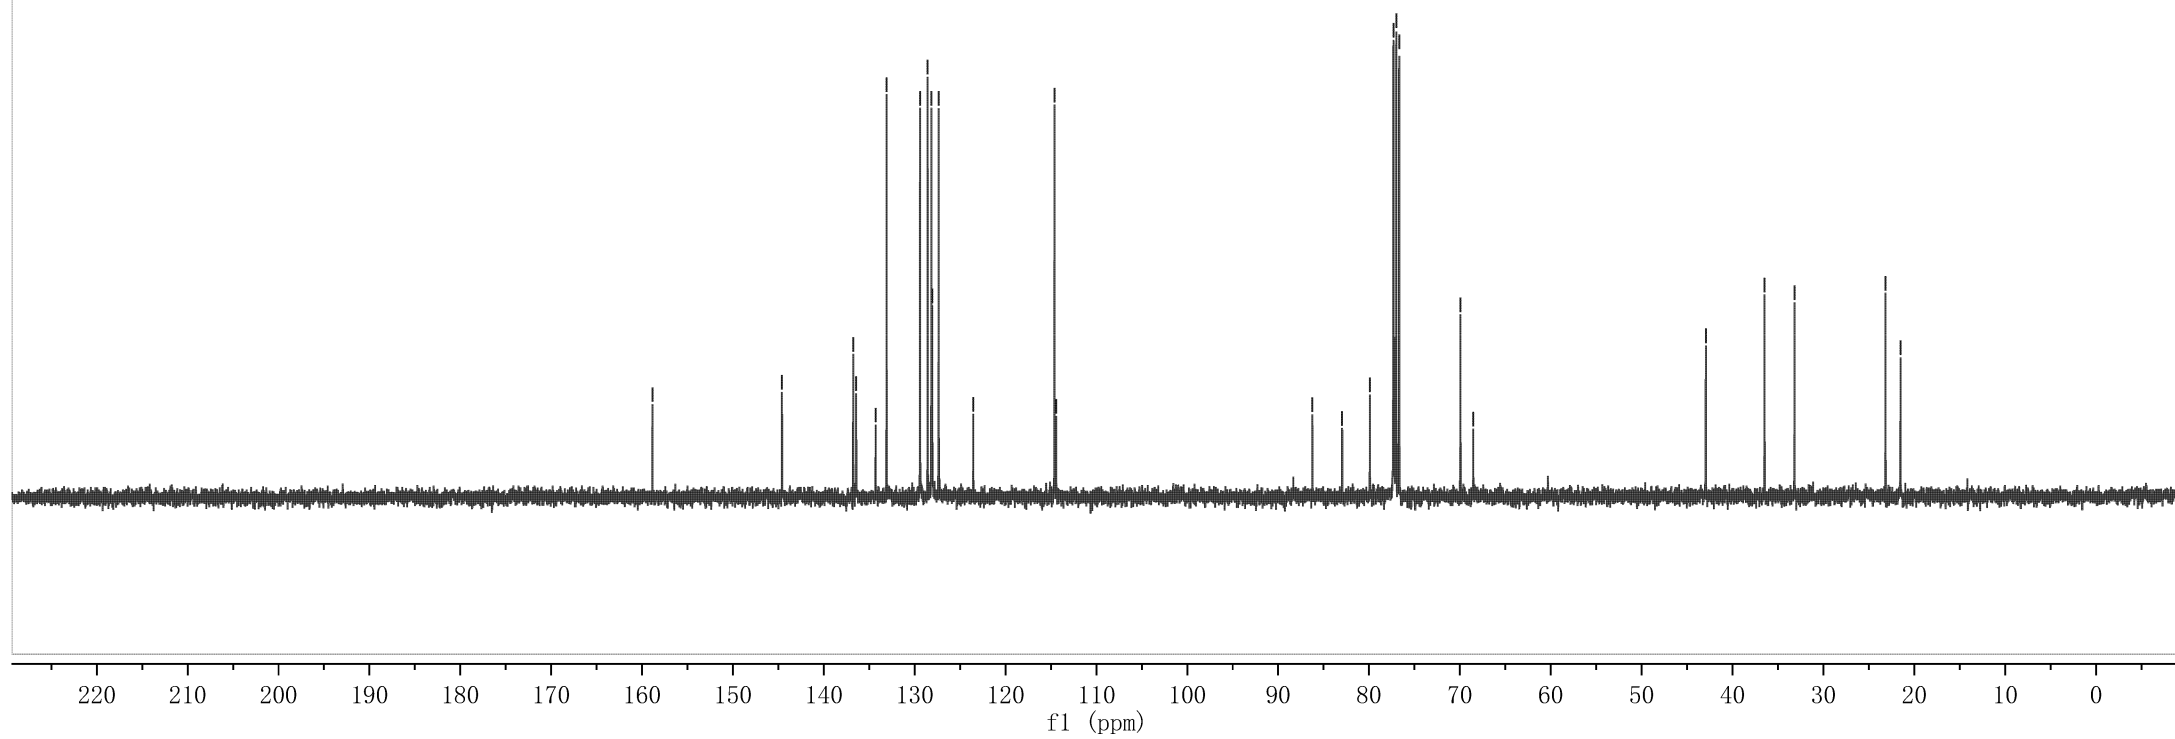

| Parameter                | Value               |
|--------------------------|---------------------|
| 1 Title                  | ZXQ-23-91           |
| 2 Origin                 | Bruker BioSpin GmbH |
| 3 Solvent                | CDC13               |
| 4 Temperature            | 298.0               |
| 5 Number of Scans        | 4                   |
| 6 Acquisition Time       | 4.0894              |
| 7 Acquisition Date       | 2020-11-19T21:57:33 |
| 8 Spectrometer Frequency | 400.13              |
| 9 Spectral Width         | 8012.8              |

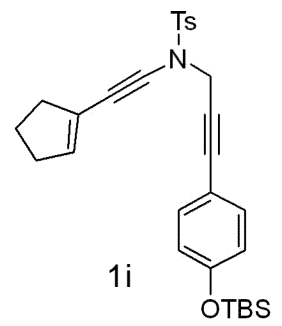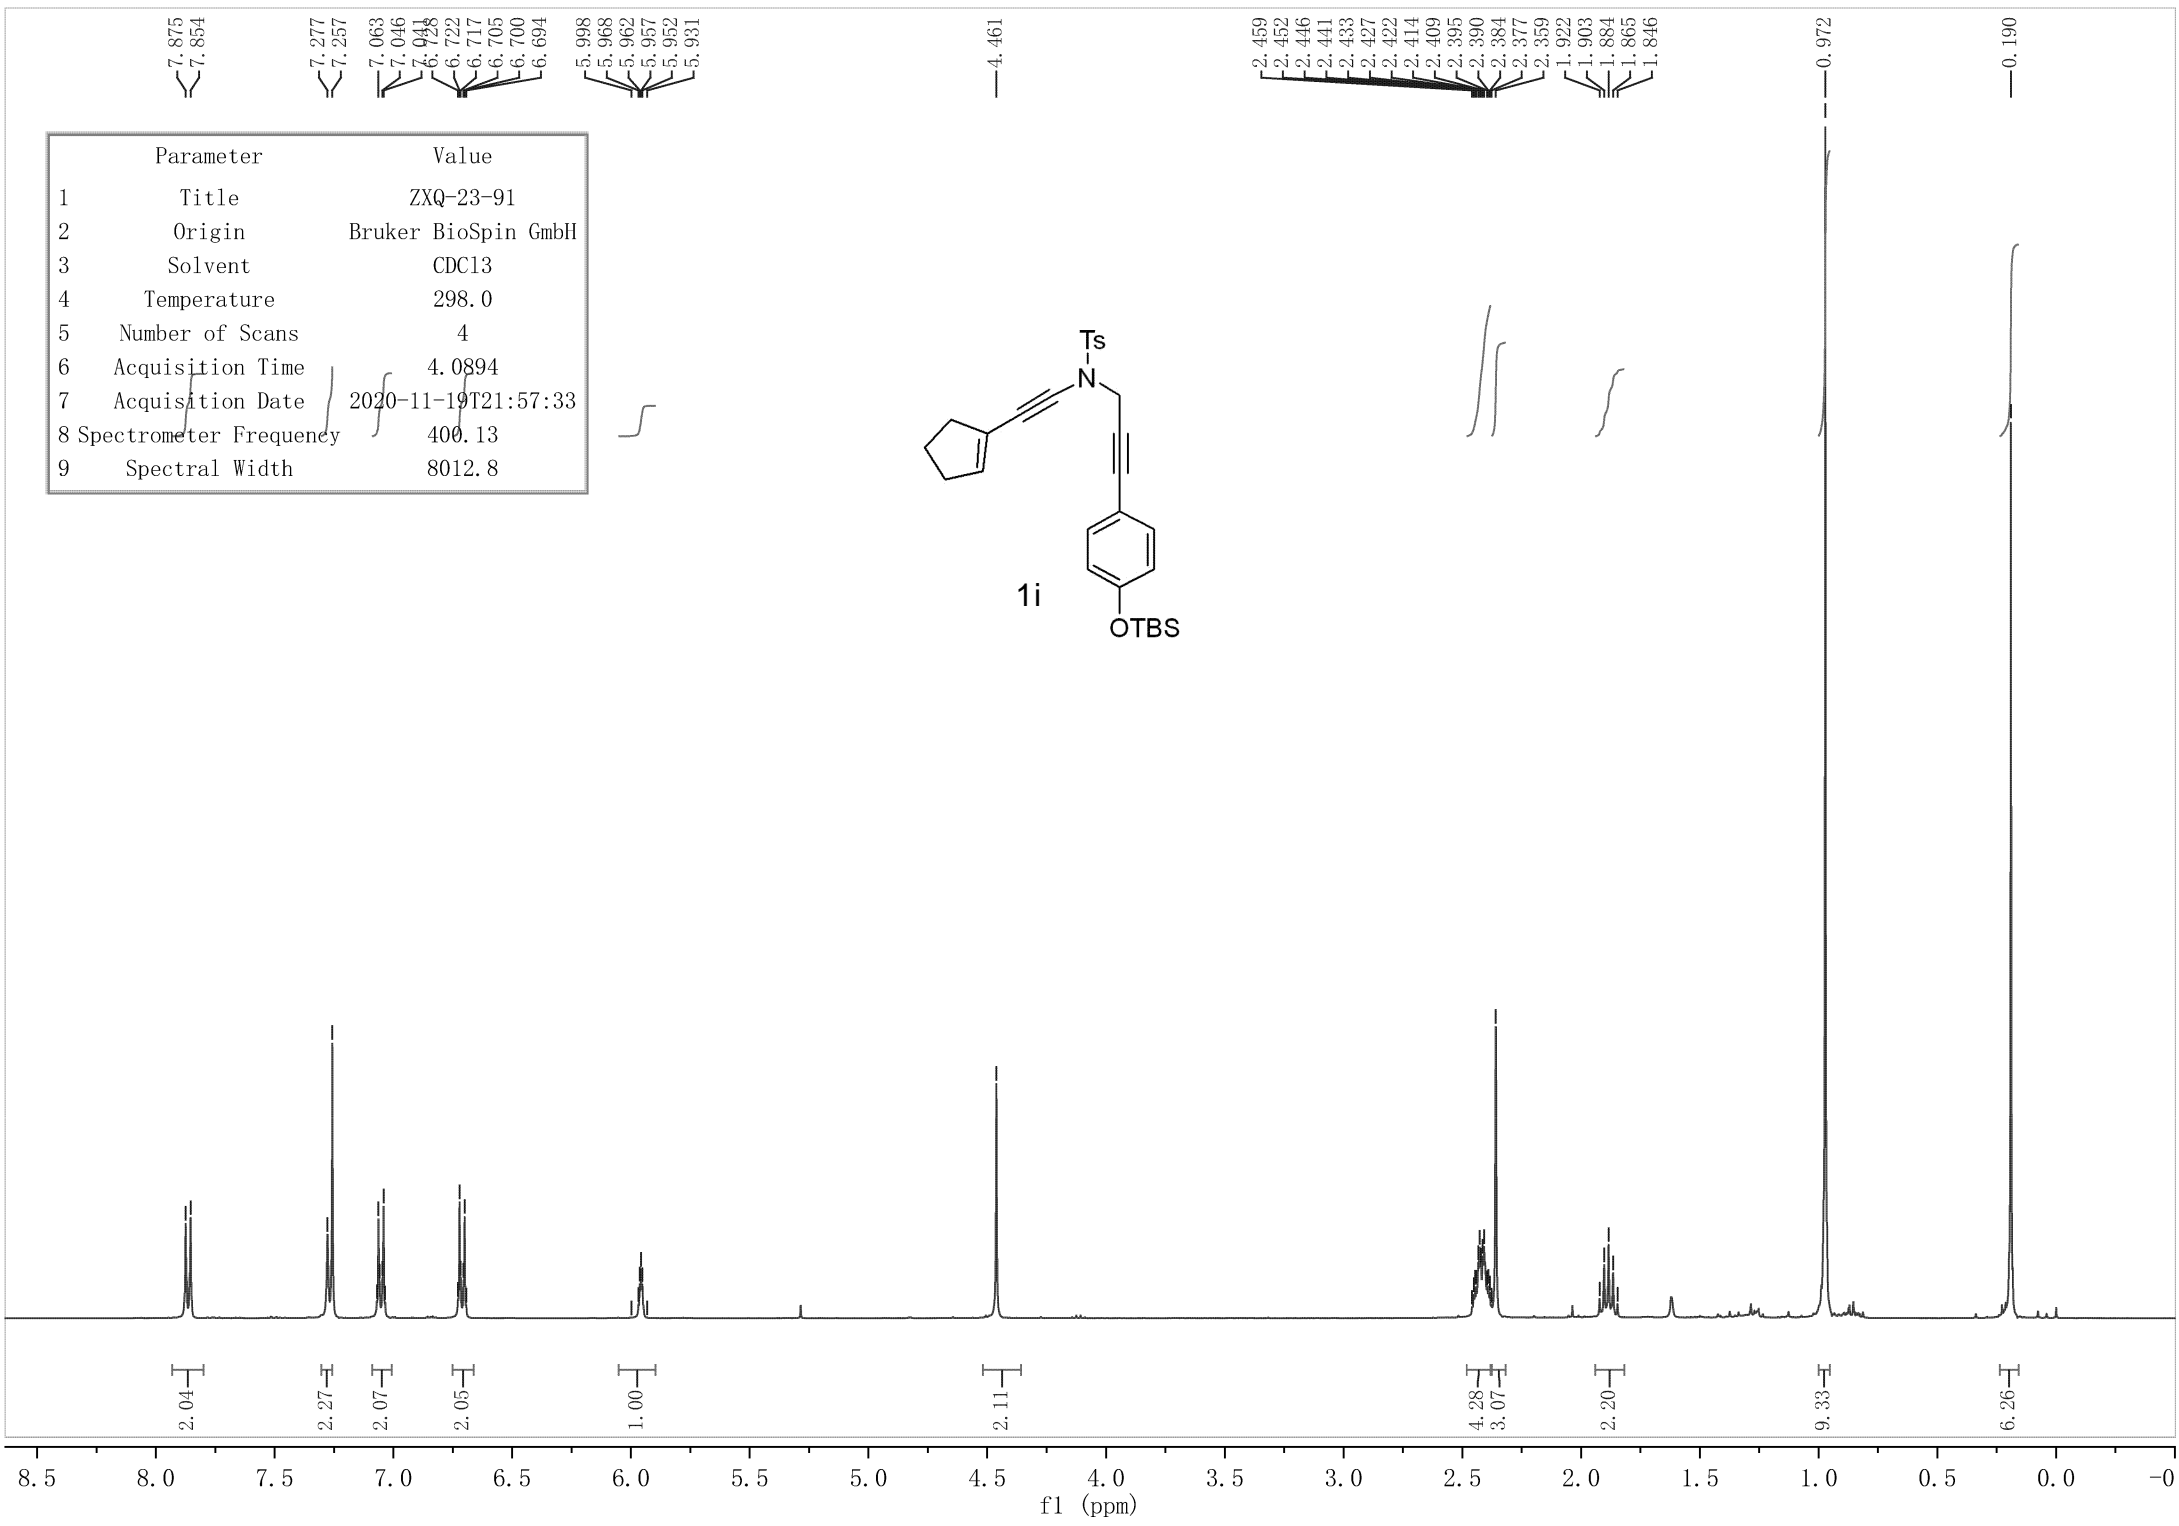

7.875  
7.854  
7.277  
7.257  
7.063  
7.046  
6.928  
6.928  
6.722  
6.717  
6.705  
6.700  
6.694  
5.998  
5.968  
5.962  
5.957  
5.952  
5.931

4.461

2.459  
2.452  
2.446  
2.441  
2.433  
2.427  
2.422  
2.414  
2.409  
2.395  
2.390  
2.384  
2.377  
2.359  
1.922  
1.903  
1.884  
1.865  
1.846

0.972

0.190



| Parameter                | Value               |
|--------------------------|---------------------|
| 1 Title                  | ZXQ-23-91-C         |
| 2 Origin                 | Bruker BioSpin GmbH |
| 3 Solvent                | CDC13               |
| 4 Temperature            | 300.0               |
| 5 Number of Scans        | 14                  |
| 6 Acquisition Time       | 1.3631              |
| 7 Acquisition Date       | 2020-11-19T21:58:36 |
| 8 Spectrometer Frequency | 100.61              |
| 9 Spectral Width         | 24038.5             |

- 156.09
- 144.57
- 136.73
- 134.33
- 133.07
- 129.41
- 128.20
- 123.59
- 119.91
- 114.84
- 86.34
- 82.97
- 79.95
- 77.32
- 77.00
- 76.68
- 68.53
- 42.95
- 36.48
- 33.18
- 25.56
- 23.18
- 21.53
- 18.16
- 4.47

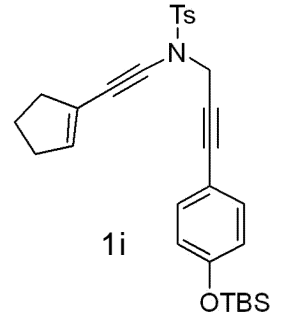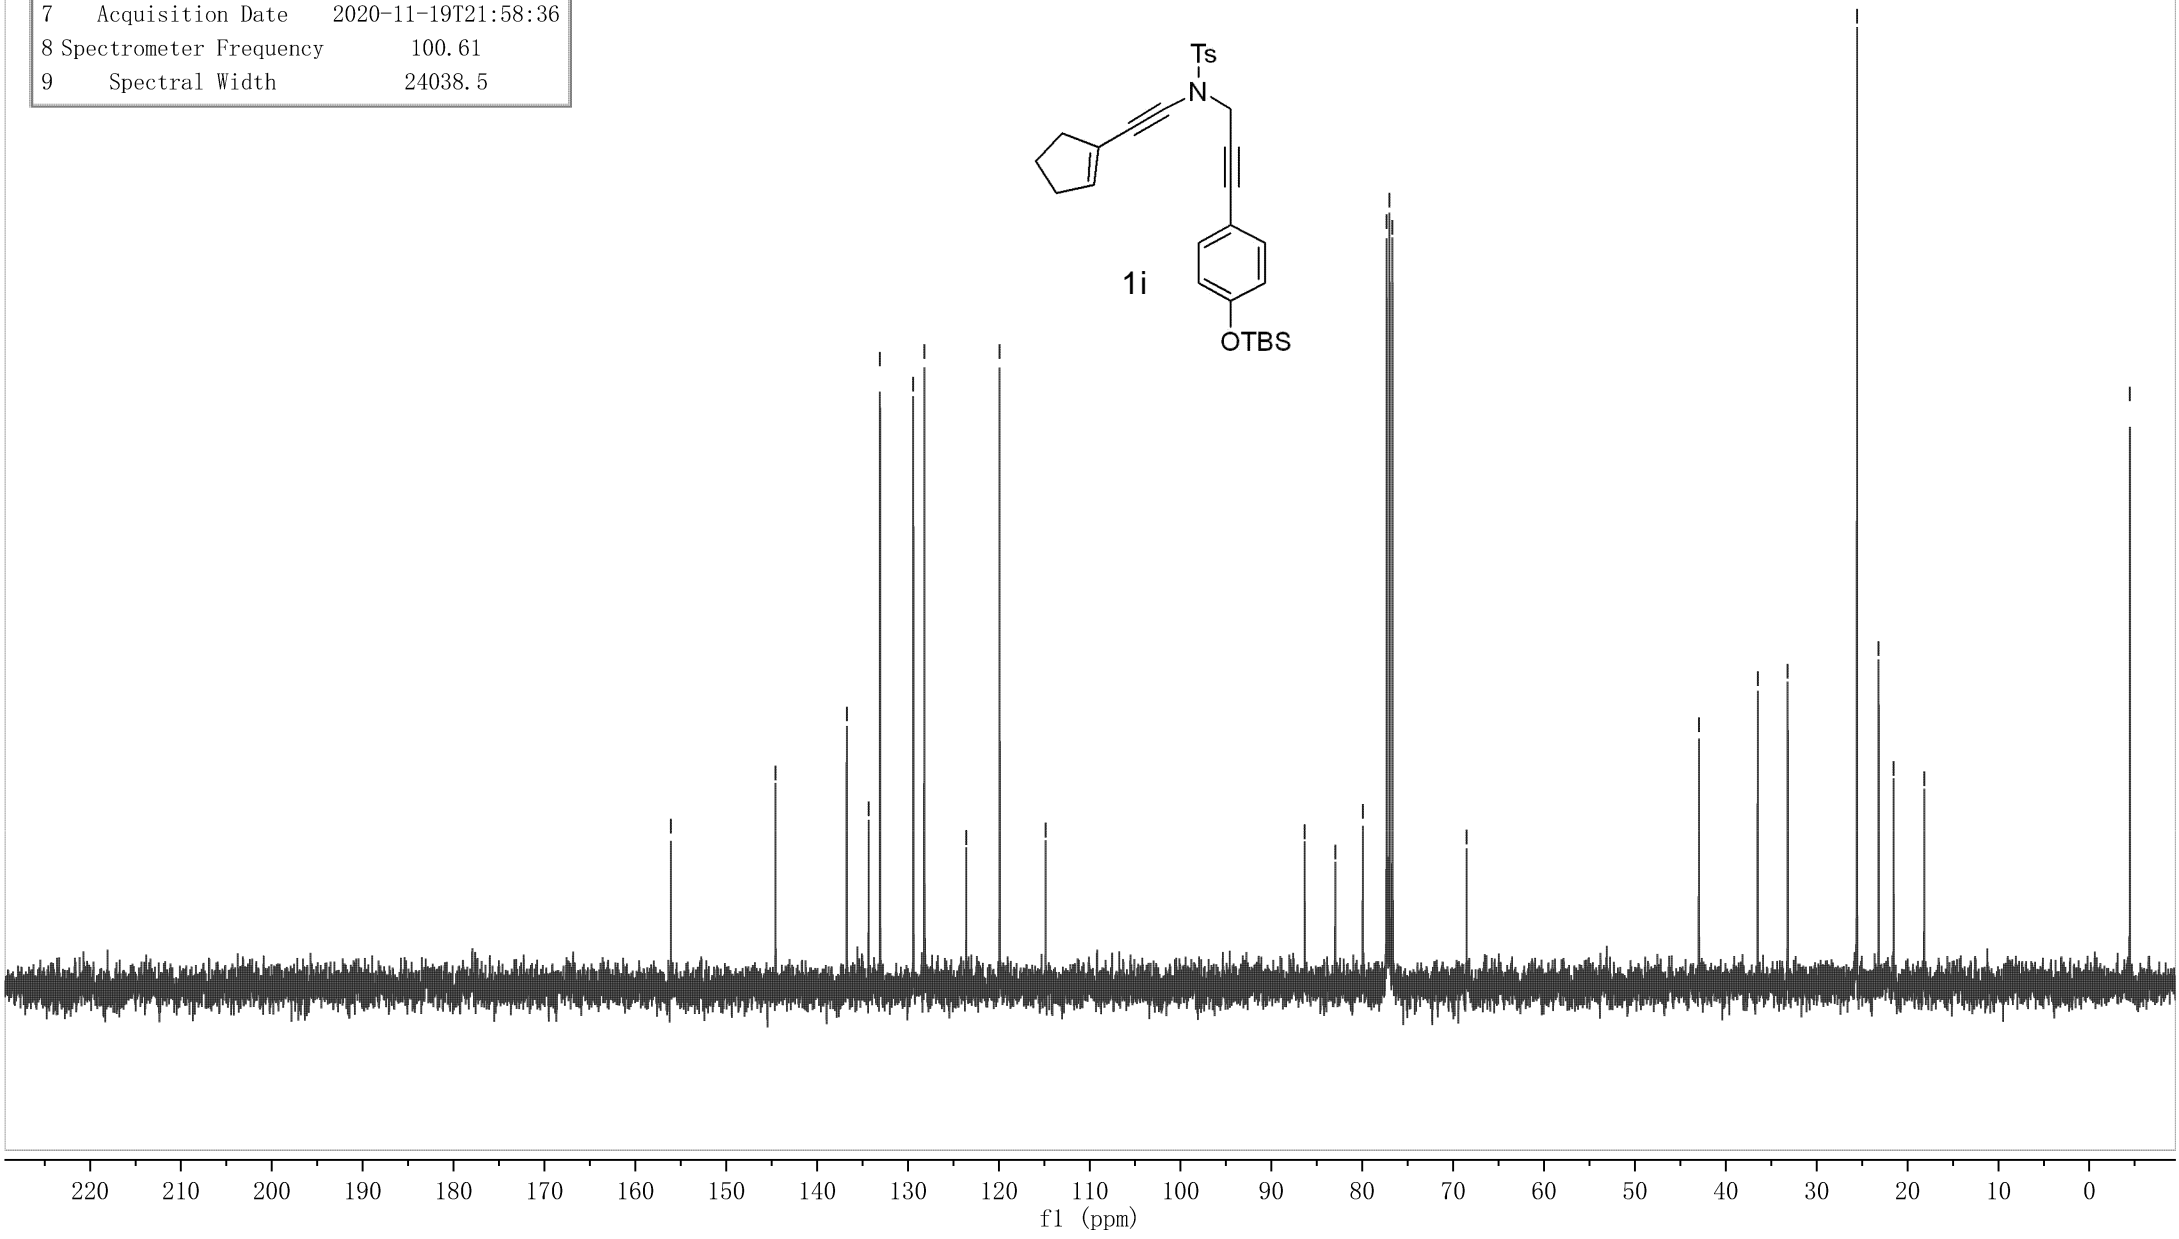

| Parameter                | Value               |
|--------------------------|---------------------|
| 1 Title                  | ZXQ-19-17           |
| 2 Origin                 | Bruker BioSpin GmbH |
| 3 Solvent                | CDCl3               |
| 4 Temperature            | 298.0               |
| 5 Number of Scans        | 4                   |
| 6 Acquisition Time       | 4.0894              |
| 7 Acquisition Date       | 2019-11-13T11:33:35 |
| 8 Spectrometer Frequency | 400.13              |
| 9 Spectral Width         | 8012.8              |

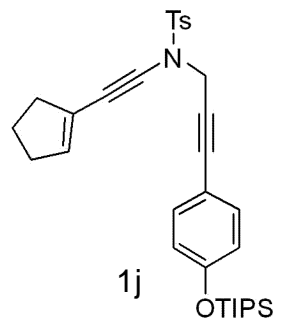

7.876  
7.855  
7.299  
7.274  
7.274  
7.057  
6.986  
6.760  
6.755  
6.743  
6.738  
6.732  
5.967  
5.961  
5.956  
5.951  
5.930  
4.463  
2.451  
2.446  
2.441  
2.432  
2.427  
2.422  
2.415  
2.408  
2.396  
2.391  
2.358  
1.922  
1.903  
1.884  
1.866  
1.847  
1.803  
1.284  
1.272  
1.268  
1.264  
1.254  
1.251  
1.246  
1.236  
1.232  
1.227  
1.218  
1.209  
1.192  
1.098  
1.080

2.07  
2.35  
2.17  
2.09  
1.00  
2.11  
4.35  
2.89  
2.16  
3.20  
18.17

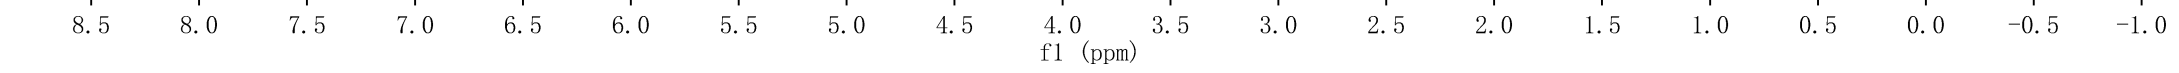

| Parameter                | Value               |
|--------------------------|---------------------|
| 1 Title                  | ZXQ-19-17-C         |
| 2 Origin                 | Bruker BioSpin GmbH |
| 3 Solvent                | CDC13               |
| 4 Temperature            | 300.0               |
| 5 Number of Scans        | 26                  |
| 6 Acquisition Time       | 1.3631              |
| 7 Acquisition Date       | 2019-11-13T11:30:07 |
| 8 Spectrometer Frequency | 100.61              |
| 9 Spectral Width         | 24038.5             |

- 156.53
- 144.56
- 136.71
- 134.85
- 133.08
- 129.41
- 128.22
- 123.61
- 119.72
- 114.50
- 86.44
- 83.00
- 79.89
- 77.32
- 77.00
- 76.68
- 68.54
- 42.99
- 36.50
- 33.19
- 23.19
- 21.53
- 17.82
- 12.61

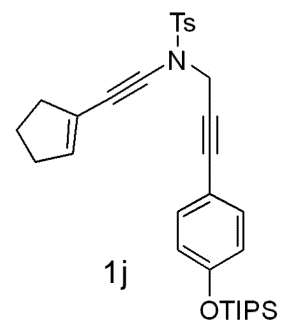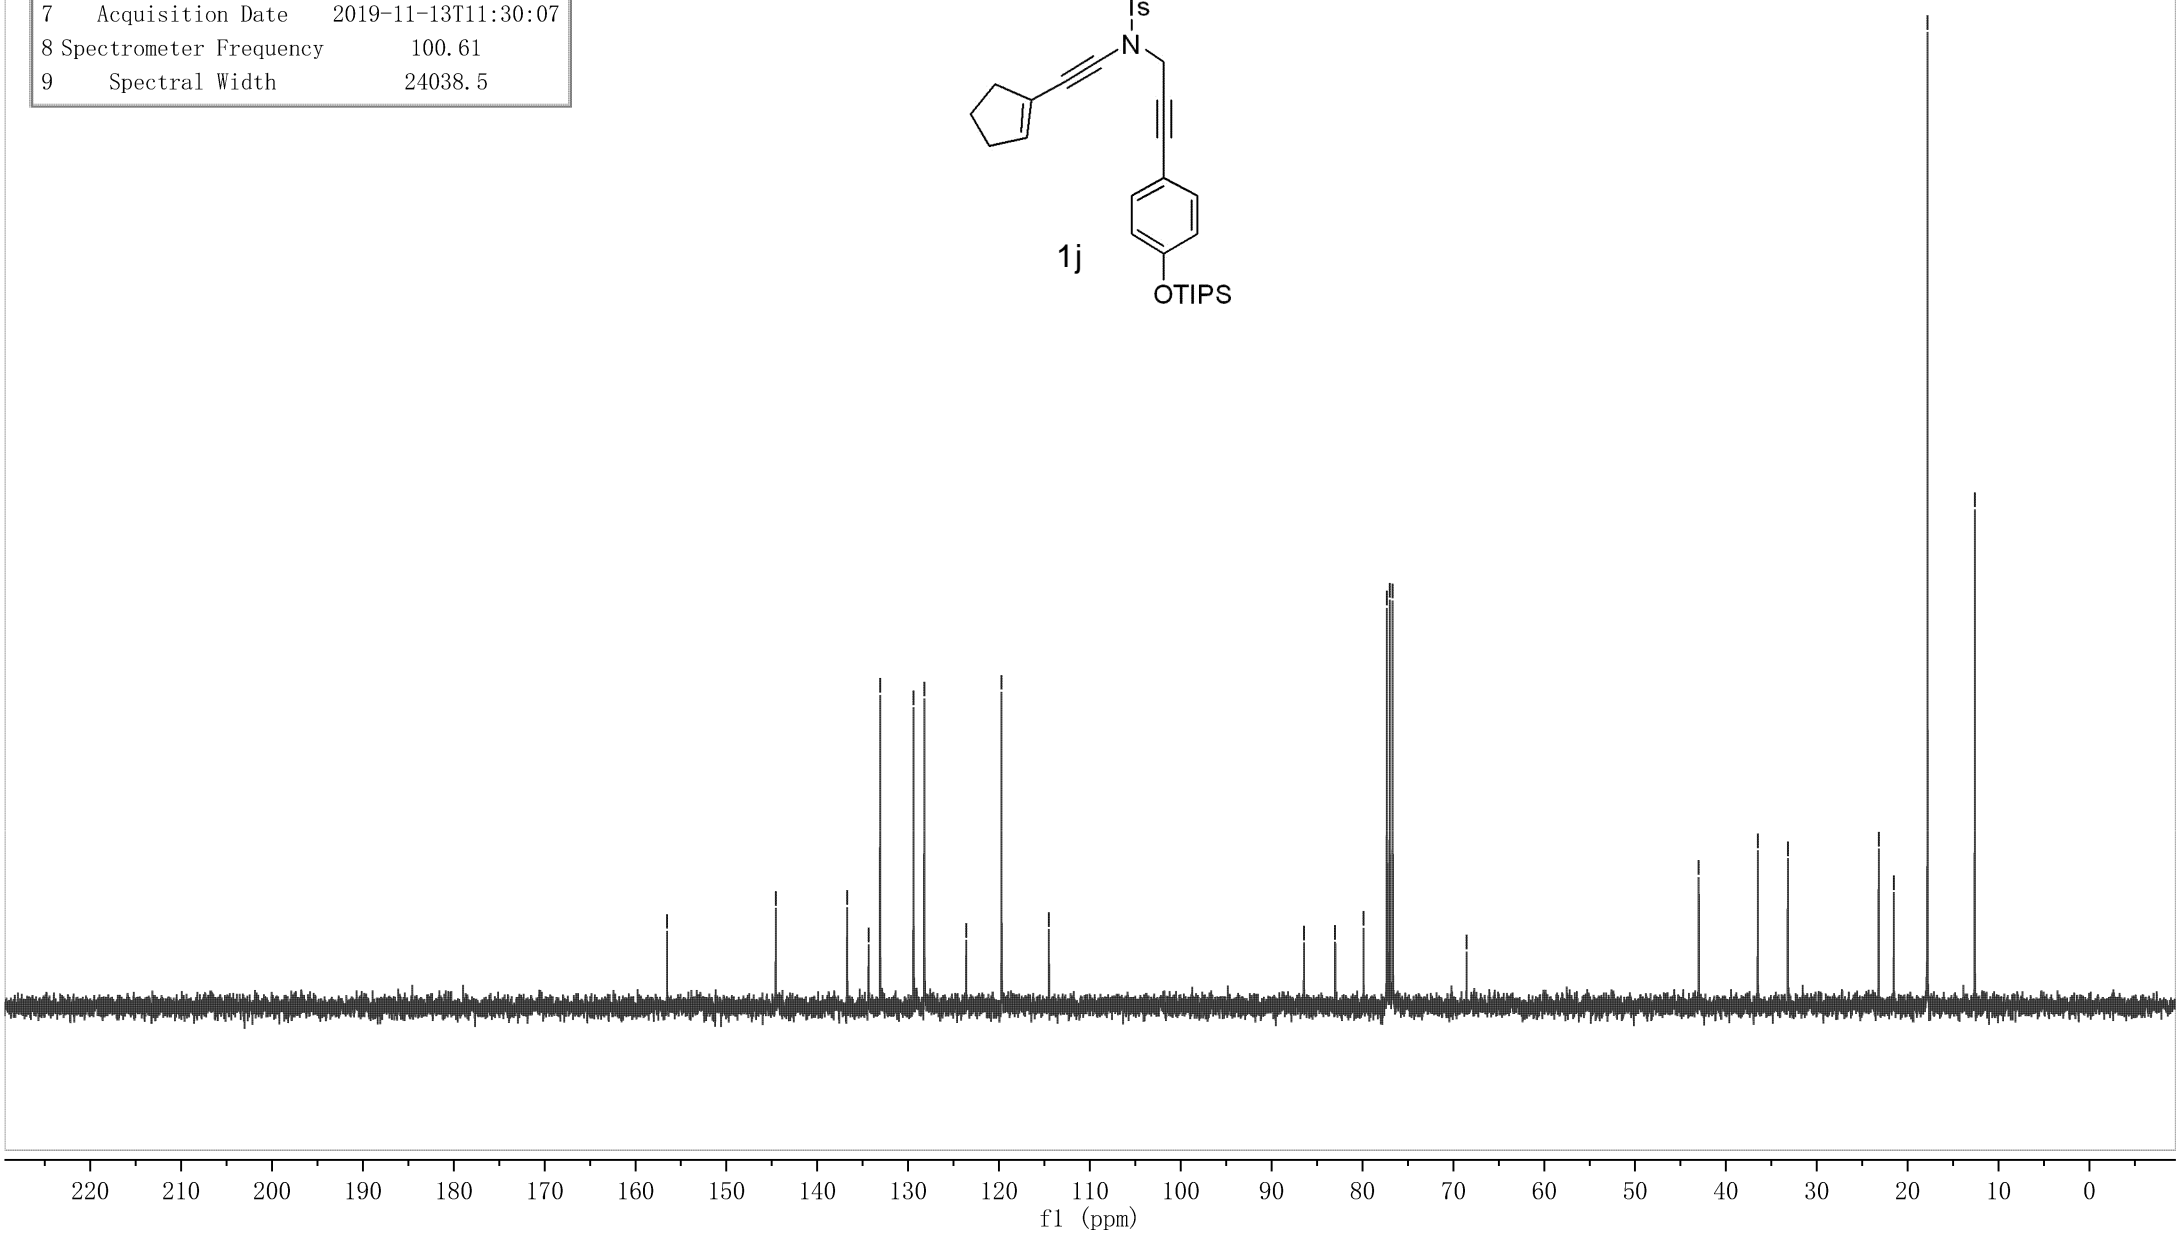

| Parameter                | Value               |
|--------------------------|---------------------|
| 1 Title                  | ZXQ-19-87           |
| 2 Origin                 | Bruker BioSpin GmbH |
| 3 Solvent                | CDC13               |
| 4 Temperature            | 298.0               |
| 5 Number of Scans        | 9                   |
| 6 Acquisition Time       | 4.0894              |
| 7 Acquisition Date       | 2019-12-03T11:35:55 |
| 8 Spectrometer Frequency | 400.13              |
| 9 Spectral Width         | 8012.8              |

7.870  
7.849  
7.282  
7.262  
7.171  
7.166  
7.154  
7.149  
7.143  
7.000  
6.995  
6.983  
6.978  
6.973

5.978  
5.973  
5.968  
5.963  
5.963  
5.931

4.470

2.453  
2.447  
2.442  
2.433  
2.429  
2.423  
2.416  
2.410  
2.406  
2.397  
2.392  
2.352  
2.283  
1.924  
1.924  
1.904  
1.886  
1.886  
1.867  
1.848

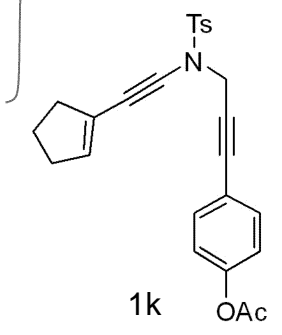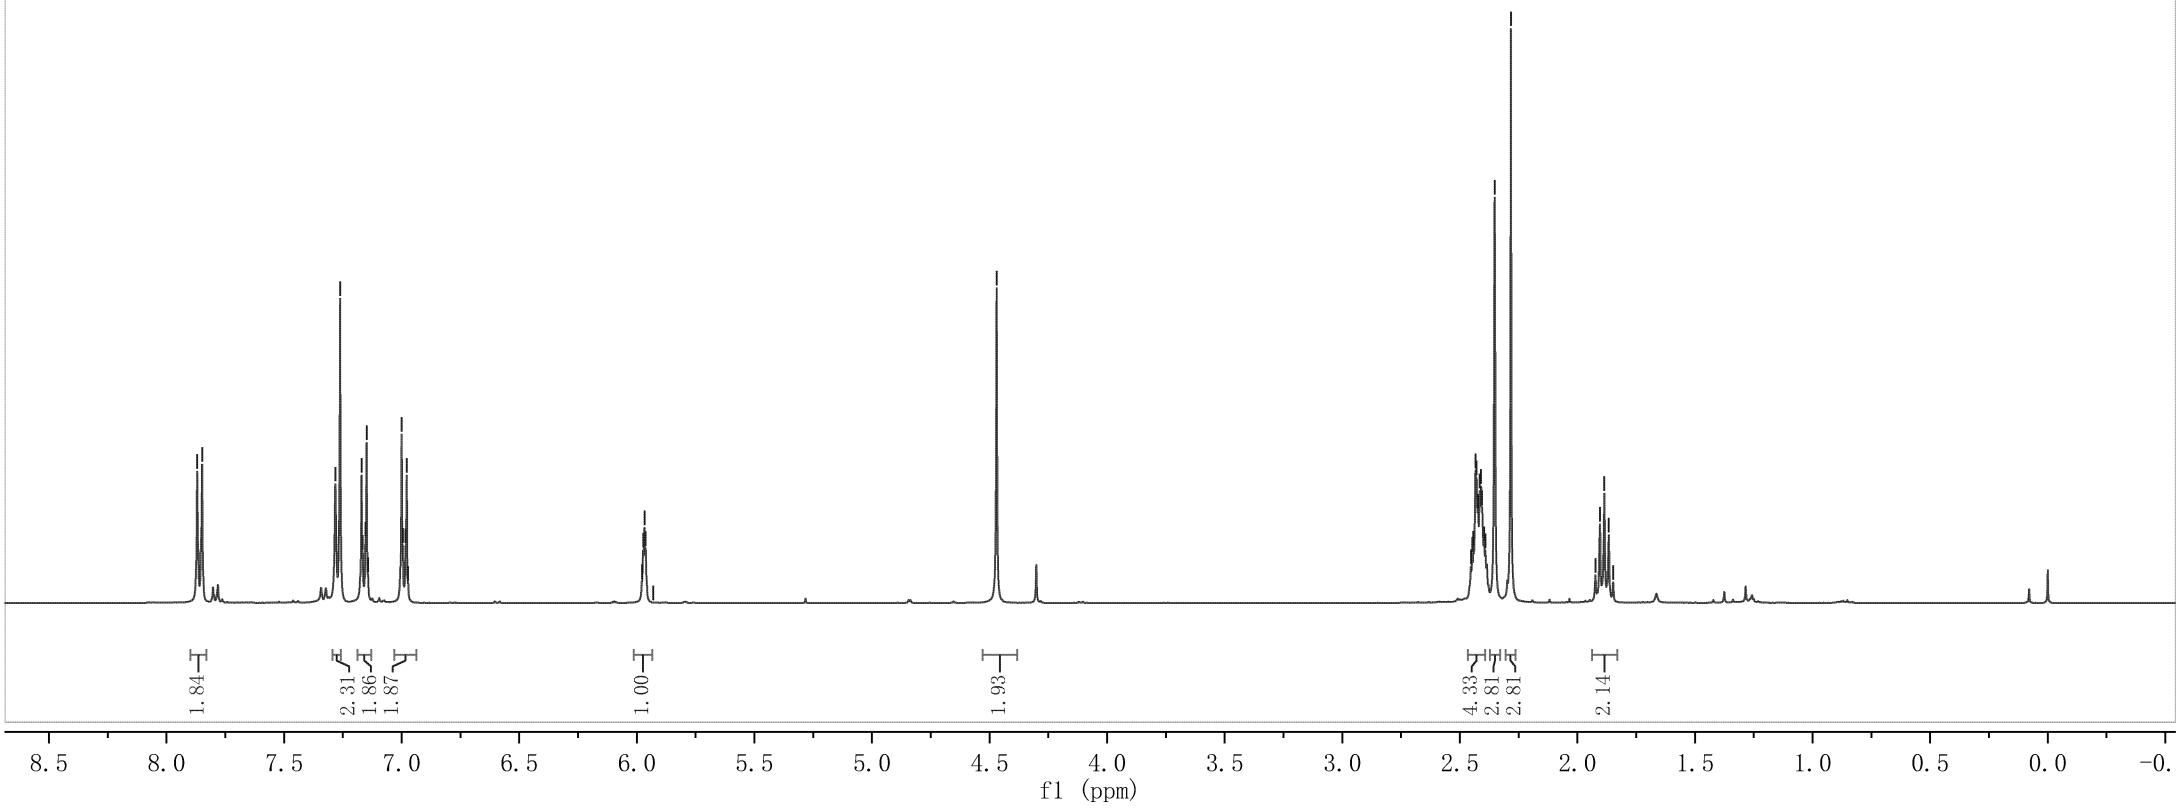

| Parameter                | Value               |
|--------------------------|---------------------|
| 1 Title                  | ZXQ-19-87-C         |
| 2 Origin                 | Bruker BioSpin GmbH |
| 3 Solvent                | CDC13               |
| 4 Temperature            | 300.0               |
| 5 Number of Scans        | 16                  |
| 6 Acquisition Time       | 1.3631              |
| 7 Acquisition Date       | 2019-12-03T11:37:47 |
| 8 Spectrometer Frequency | 100.61              |
| 9 Spectral Width         | 24038.5             |

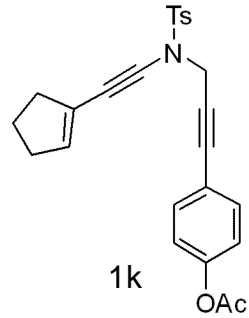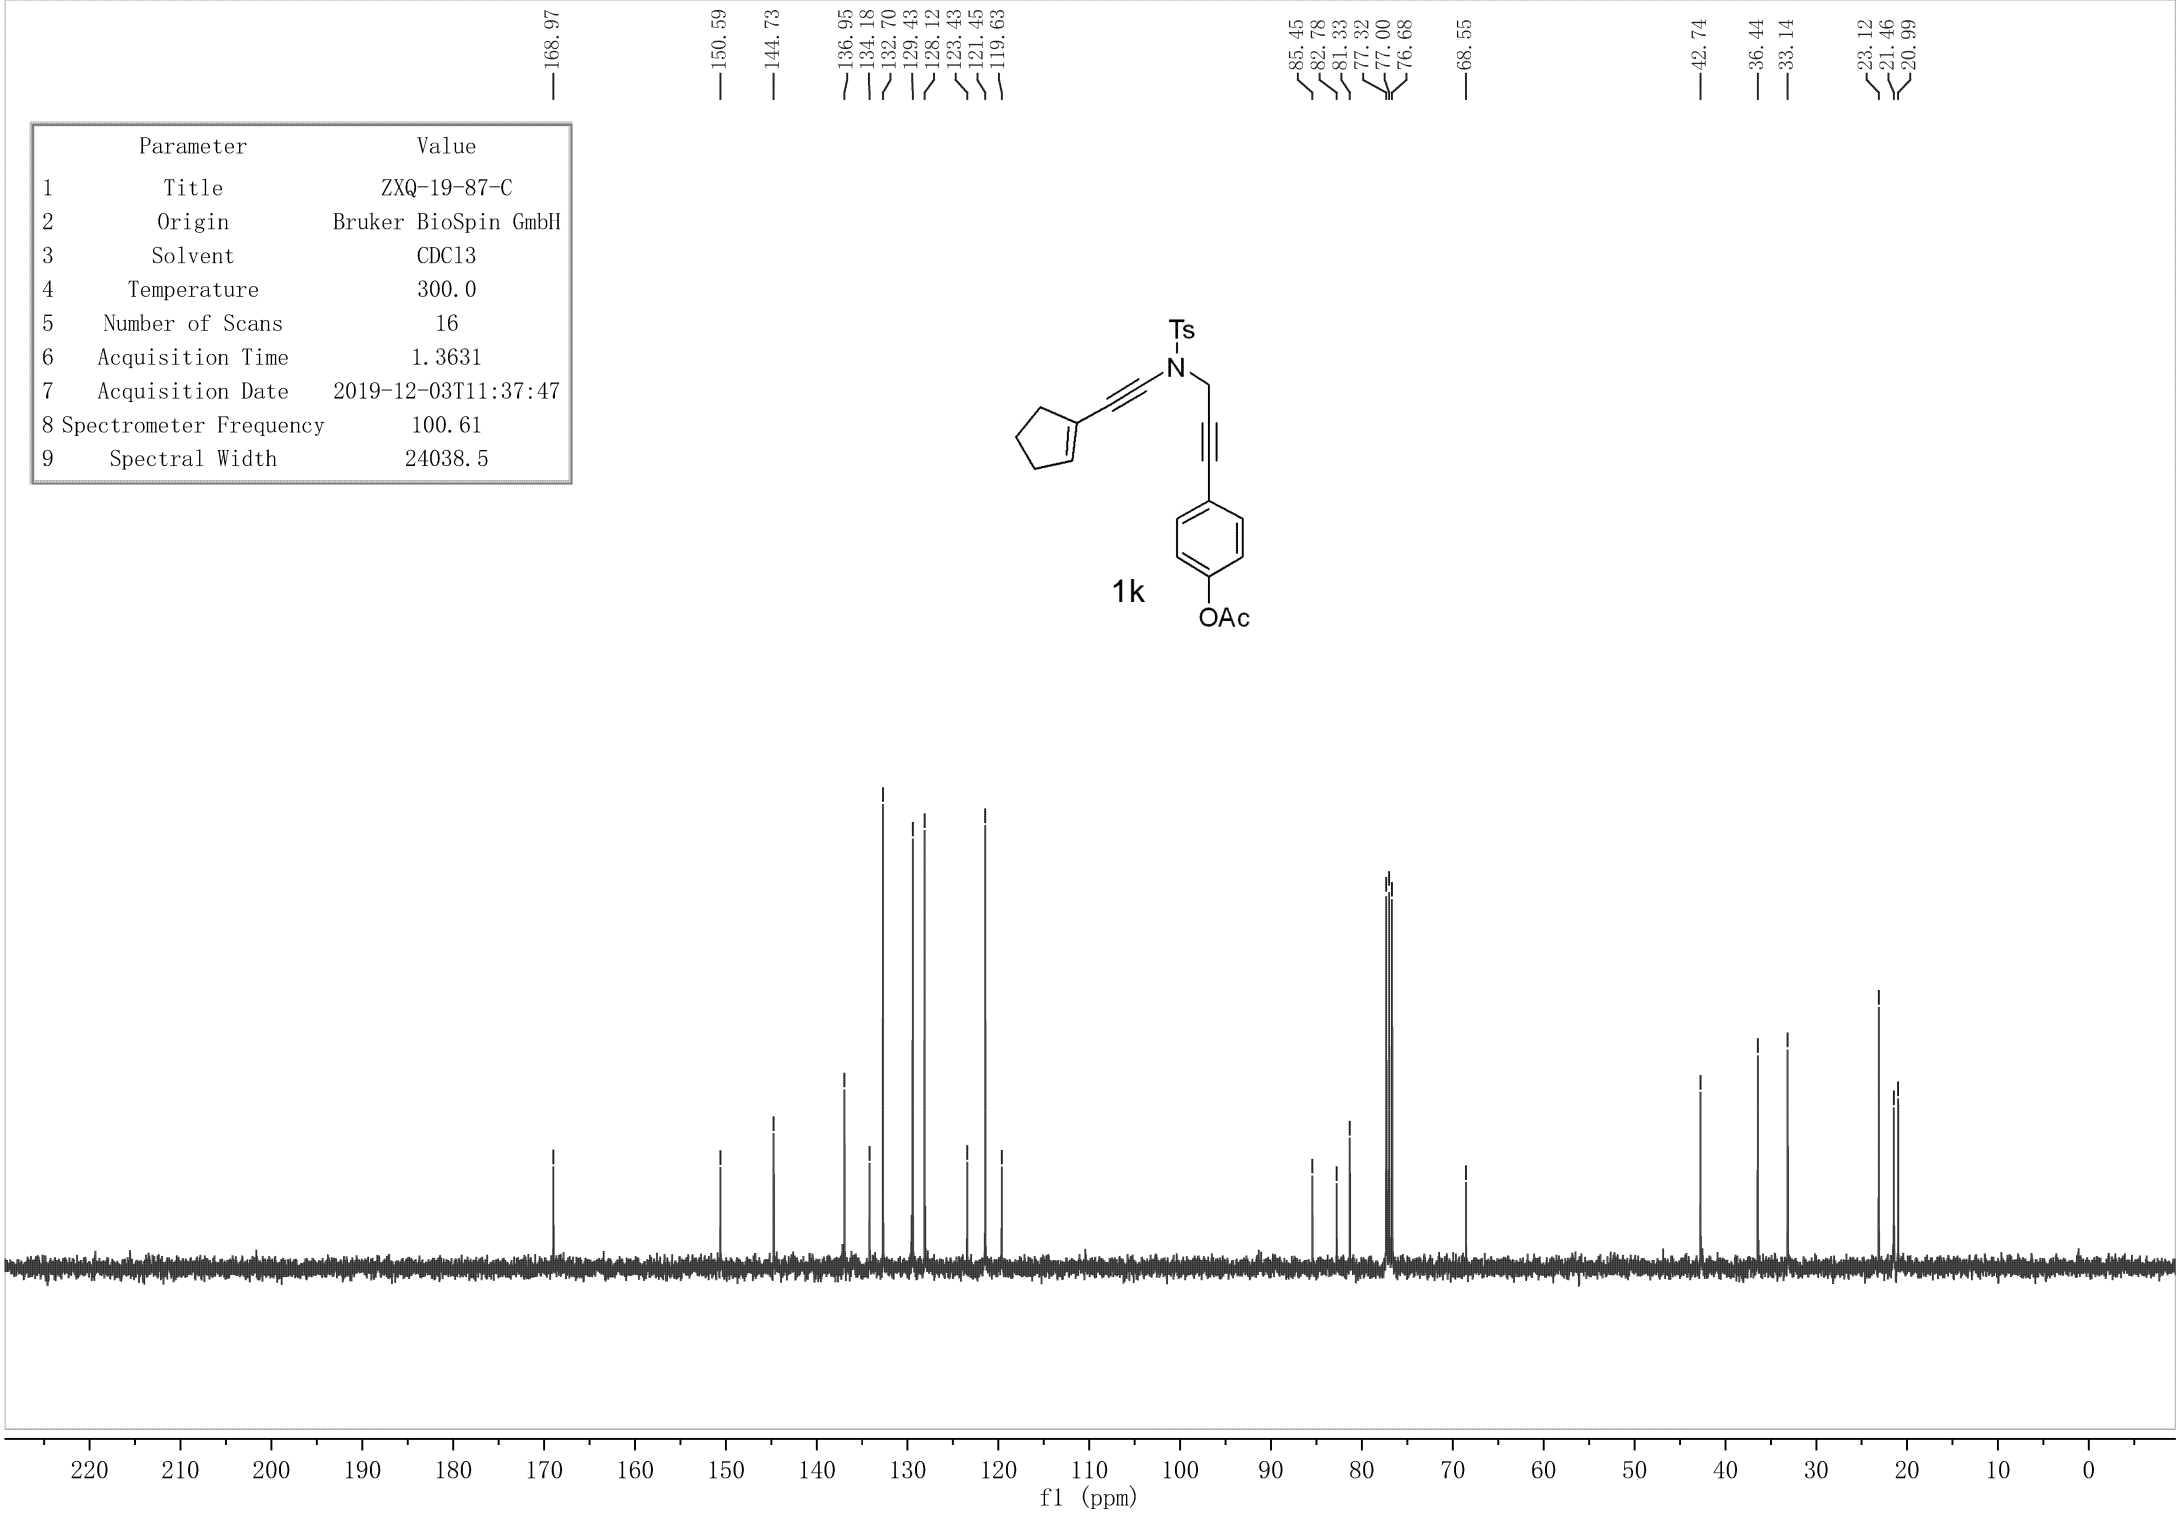

| Parameter                | Value               |
|--------------------------|---------------------|
| 1 Title                  | ZXQ-18-203-1        |
| 2 Origin                 | Bruker BioSpin GmbH |
| 3 Solvent                | CDCl3               |
| 4 Temperature            | 298.0               |
| 5 Number of Scans        | 7                   |
| 6 Acquisition Time       | 4.0894              |
| 7 Acquisition Date       | 2019-11-01T18:58:12 |
| 8 Spectrometer Frequency | 400.13              |
| 9 Spectral Width         | 8012.8              |

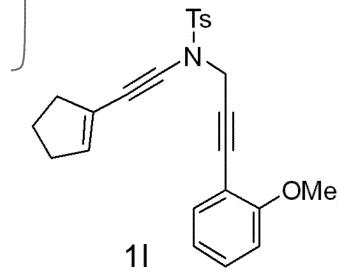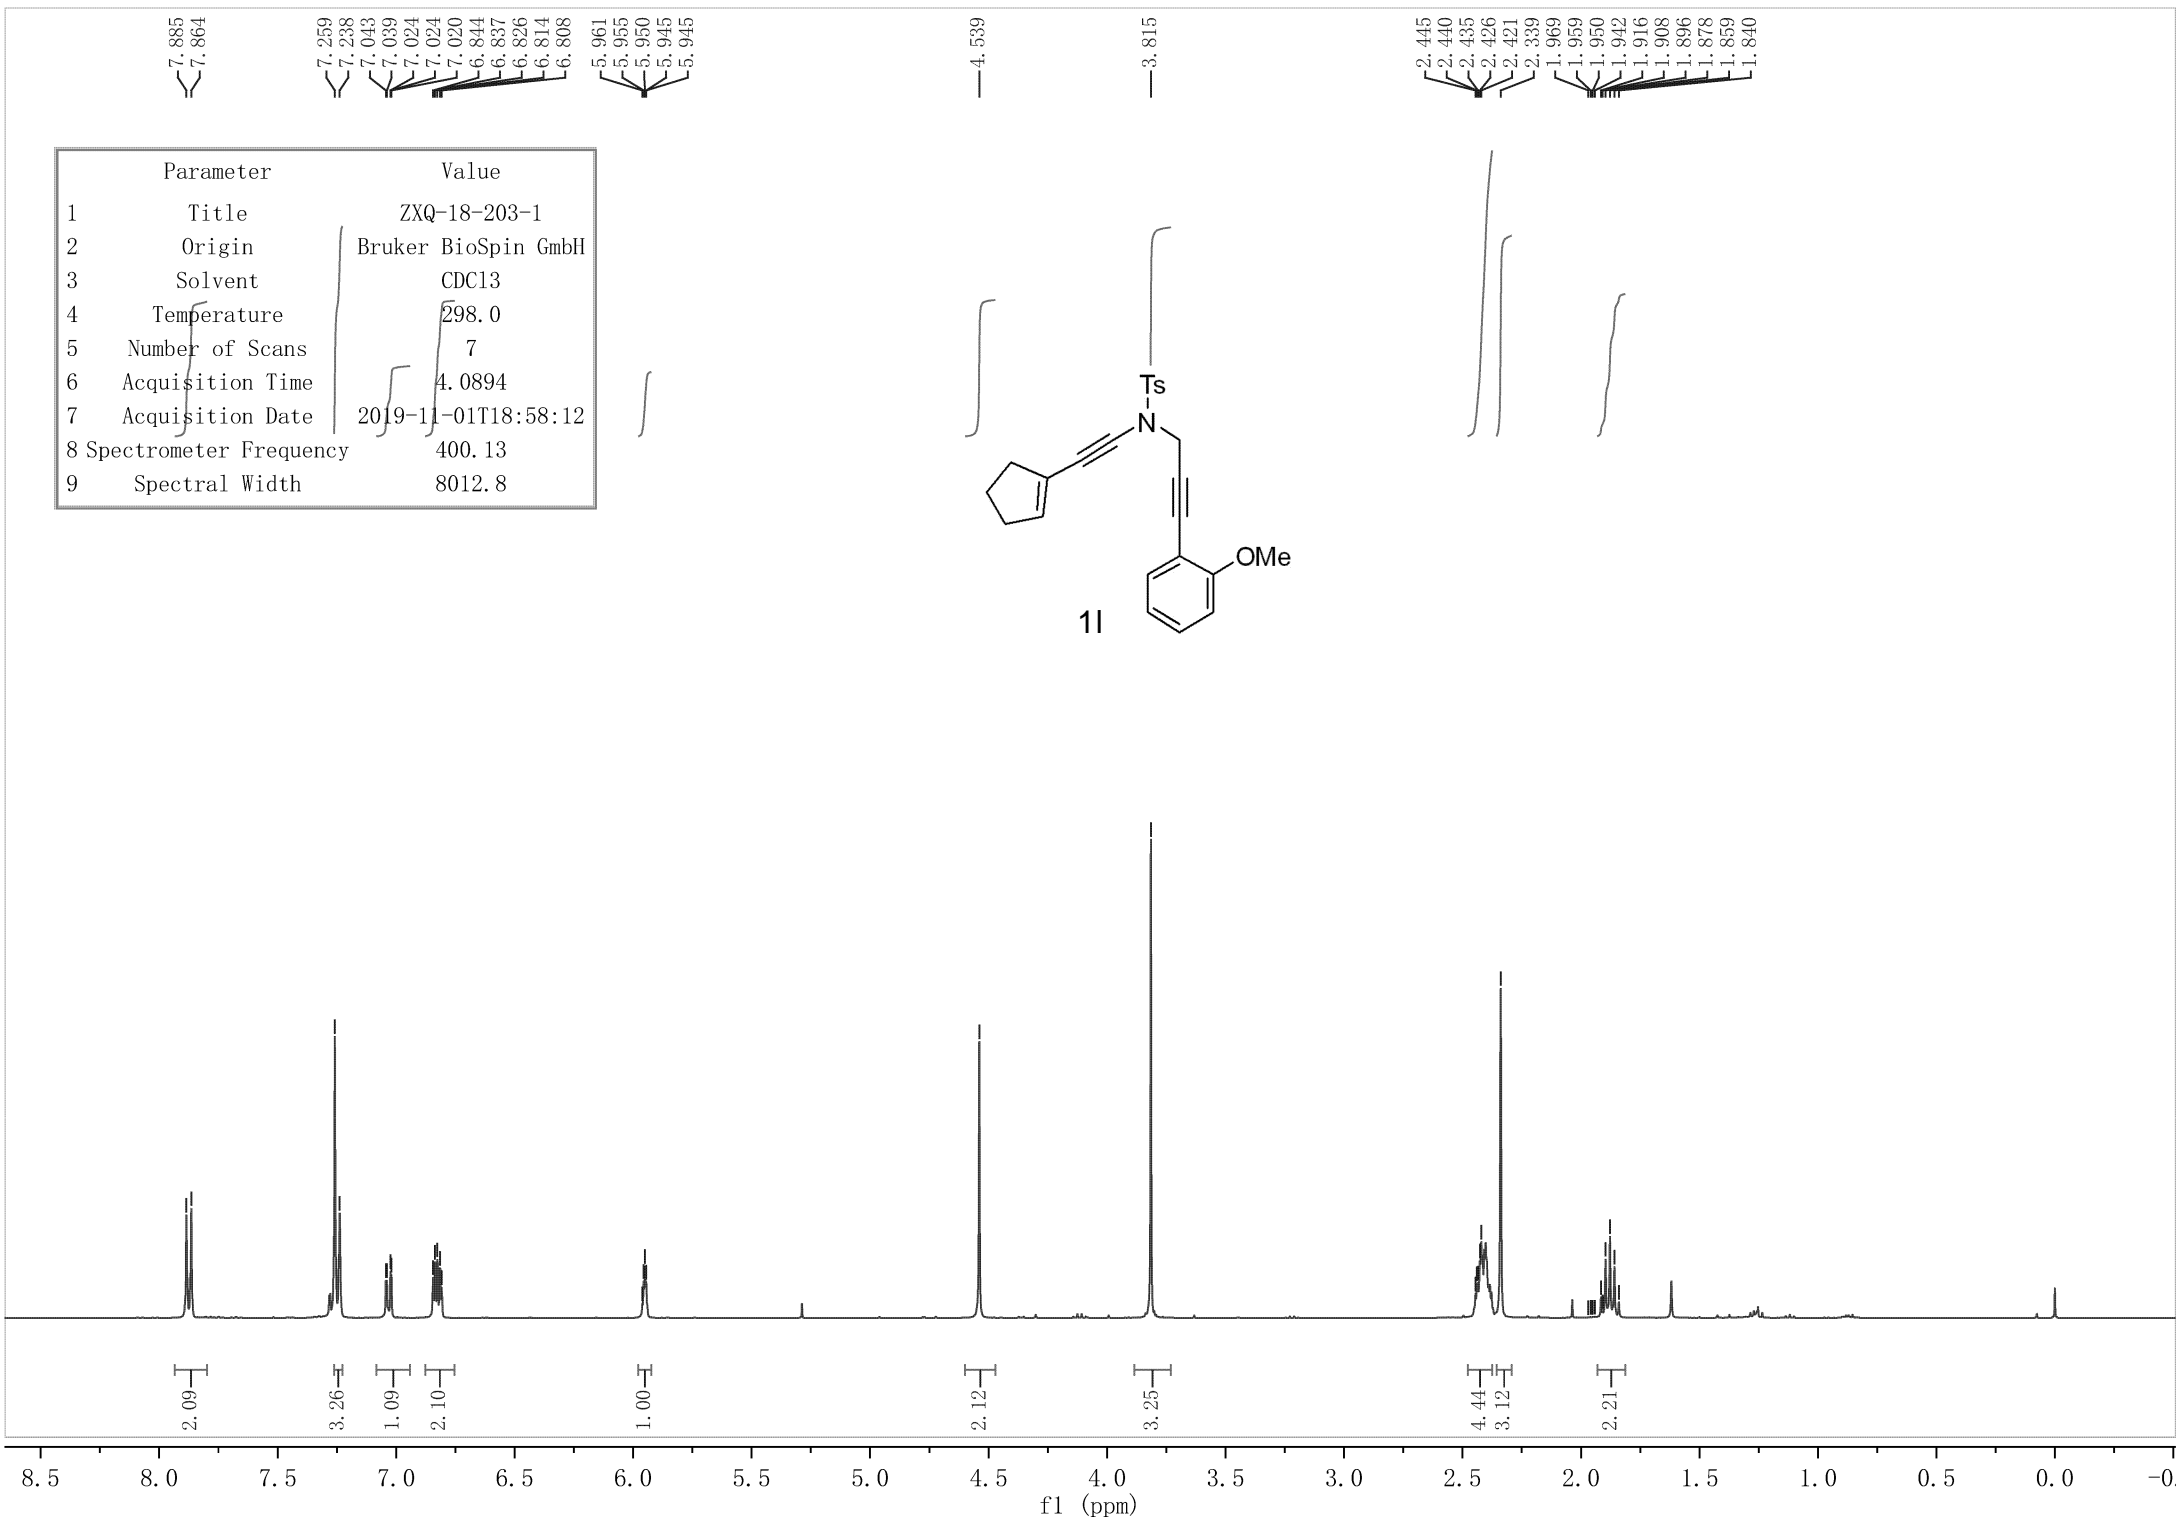

7.885  
7.864

7.259  
7.238  
7.043  
7.039  
7.024  
7.024  
7.020  
6.844  
6.837  
6.826  
6.814  
6.808

5.961  
5.955  
5.950  
5.945  
5.945

4.539

3.815

2.445  
2.440  
2.435  
2.426  
2.421  
2.339  
1.969  
1.959  
1.950  
1.942  
1.916  
1.908  
1.896  
1.878  
1.859  
1.840

| Parameter                | Value               |
|--------------------------|---------------------|
| 1 Title                  | ZXQ-18-203-C        |
| 2 Origin                 | Bruker BioSpin GmbH |
| 3 Solvent                | CDC13               |
| 4 Temperature            | 300.0               |
| 5 Number of Scans        | 34                  |
| 6 Acquisition Time       | 1.3631              |
| 7 Acquisition Date       | 2019-11-01T18:55:17 |
| 8 Spectrometer Frequency | 100.61              |
| 9 Spectral Width         | 24038.5             |

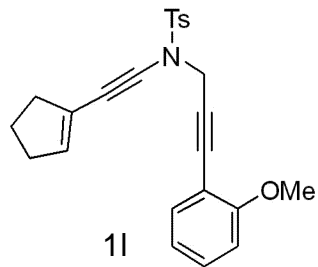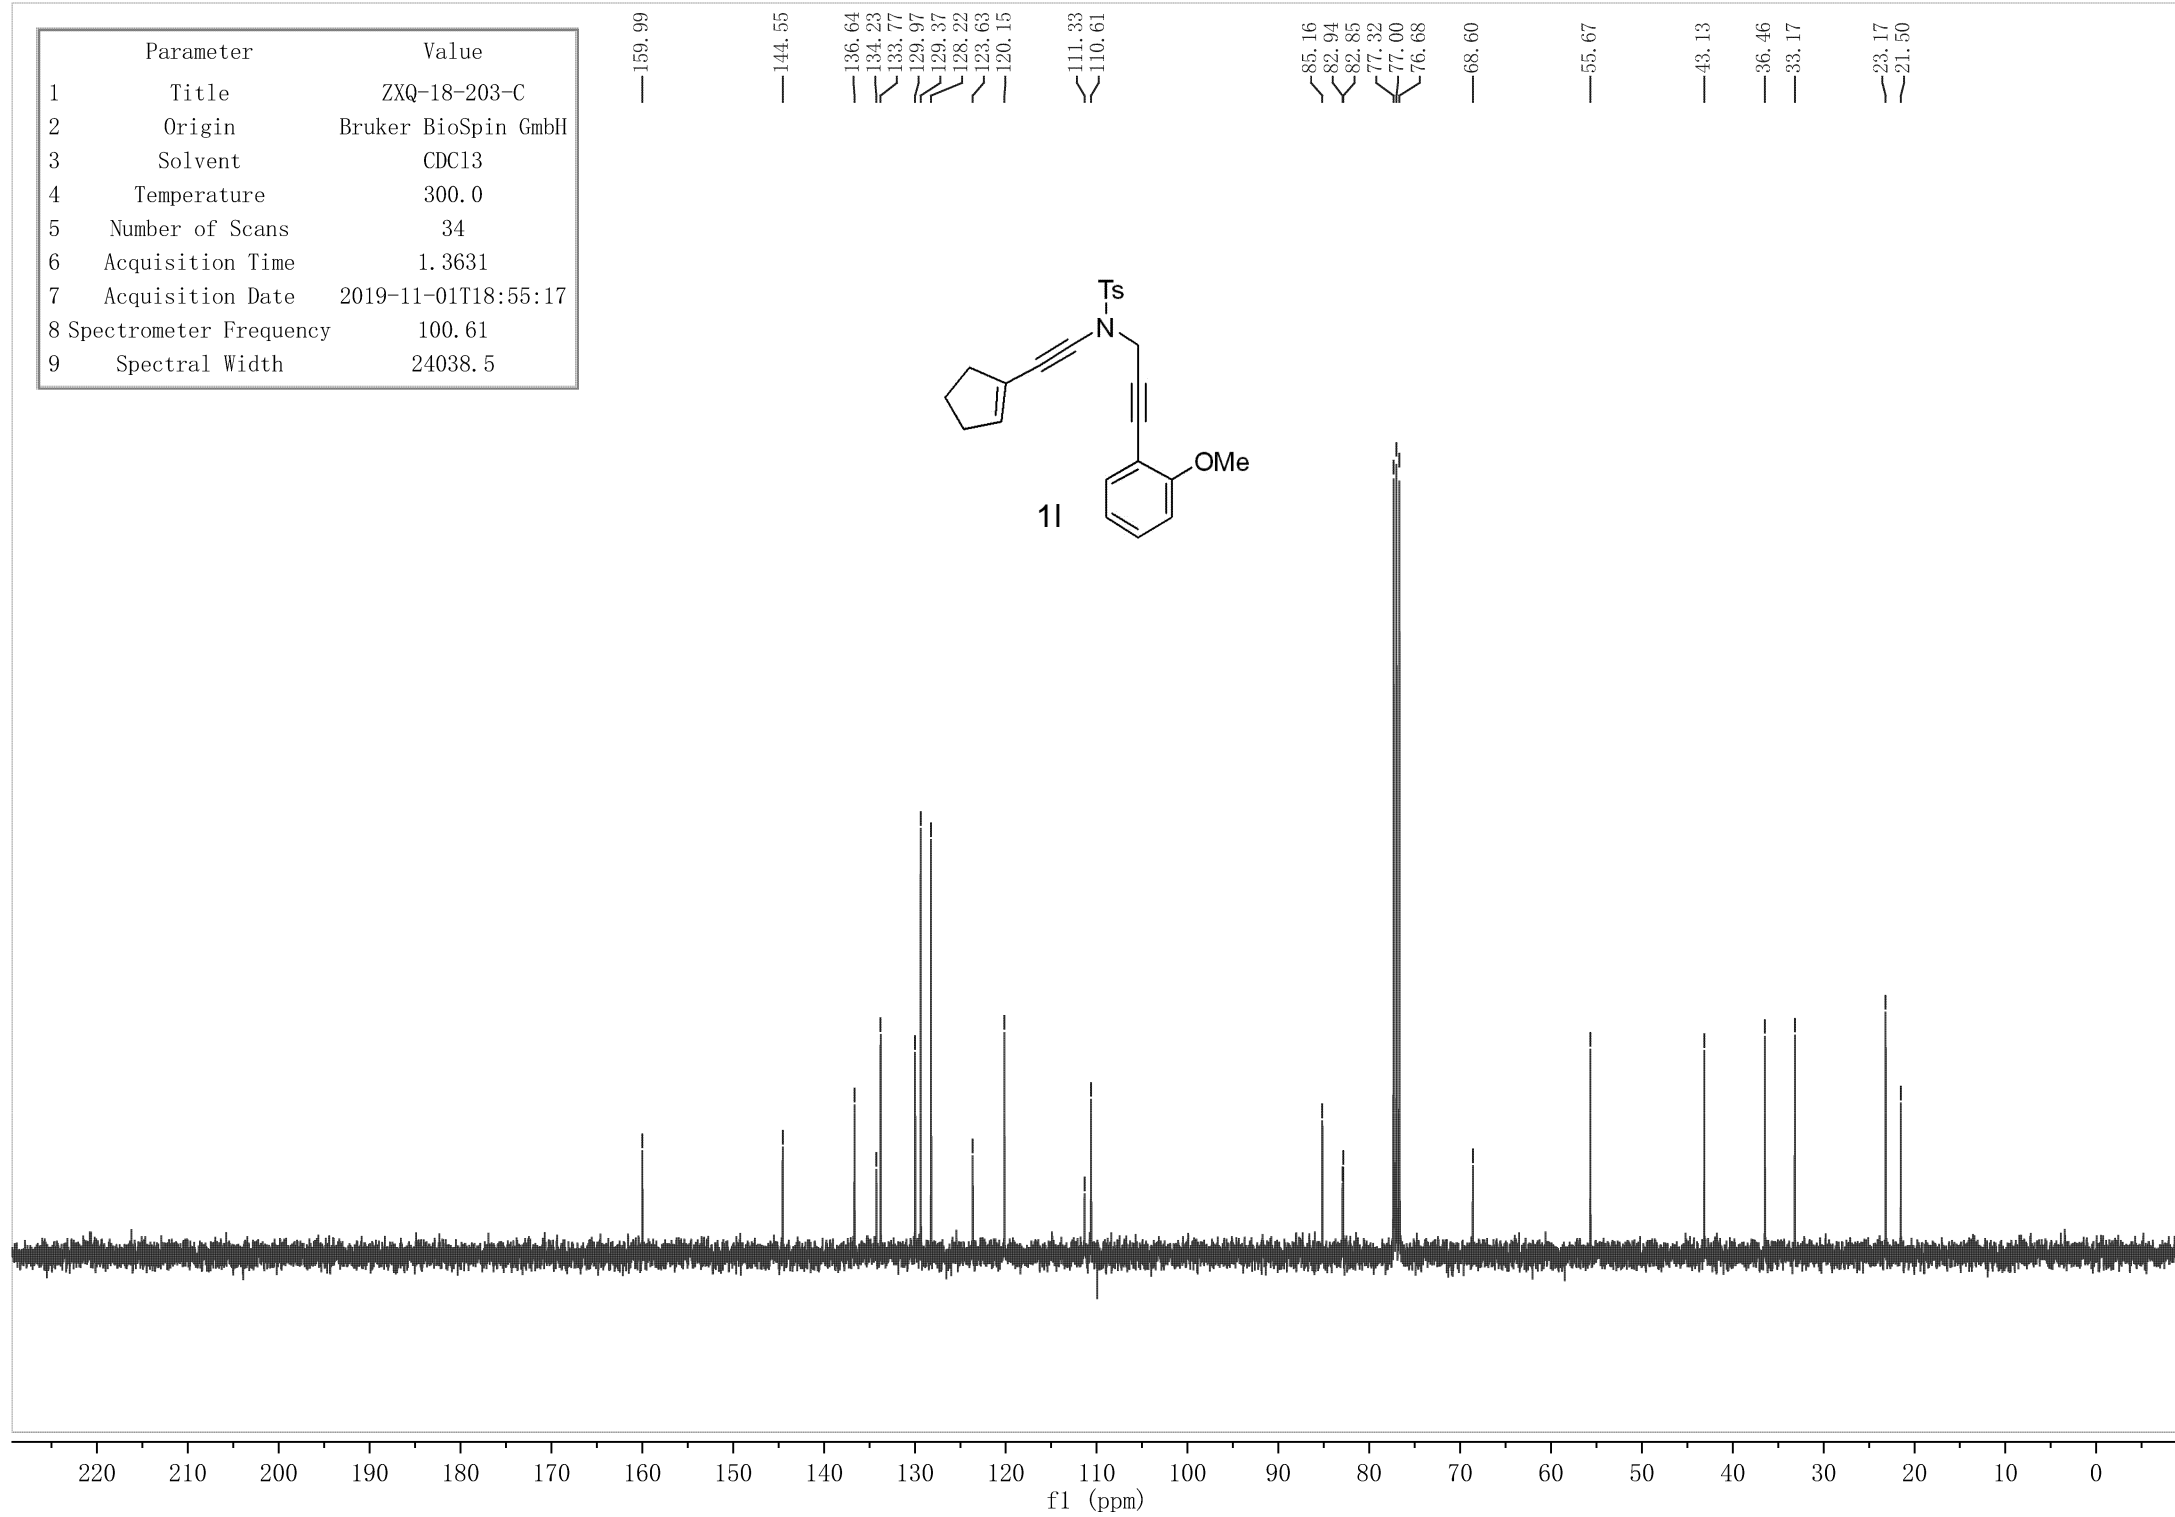

7.879  
7.858

7.289  
7.269  
7.255

7.008  
6.939  
6.937  
6.672

5.969  
5.963  
5.958  
5.953  
5.947

4.463

3.808  
2.452  
2.447  
2.442  
2.431  
2.428  
2.425  
2.412  
2.412  
2.409  
2.406  
2.404  
2.394  
2.388  
2.380  
2.371  
2.145  
1.919  
1.900  
1.881  
1.881  
1.871  
1.862  
1.844

| Parameter                | Value               |
|--------------------------|---------------------|
| 1 Title                  | ZXQ-18-241-H2       |
| 2 Origin                 | Bruker BioSpin GmbH |
| 3 Solvent                | CDC13               |
| 4 Temperature            | 298.0               |
| 5 Number of Scans        | 4                   |
| 6 Acquisition Time       | 4.0894              |
| 7 Acquisition Date       | 2019-11-09T18:49:24 |
| 8 Spectrometer Frequency | 400.13              |
| 9 Spectral Width         | 8012.8              |

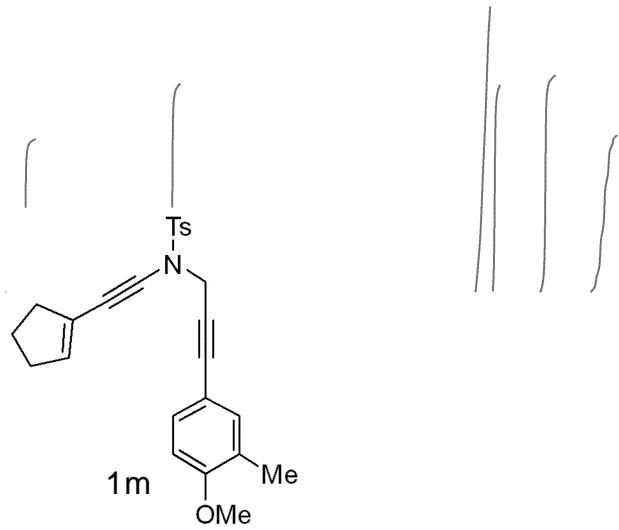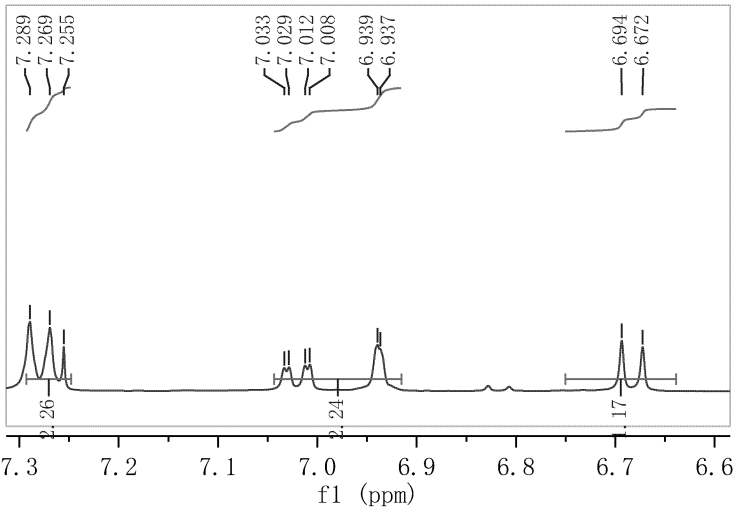

2.21

2.26

2.24

1.17

1.00

2.32

3.16

4.34

3.14

3.29

2.38

8.5 8.0 7.5 7.0 6.5 6.0 5.5 5.0 4.5 4.0 3.5 3.0 2.5 2.0 1.5 1.0 0.5 0.0 -0.5

f1 (ppm)



| Parameter                | Value               |
|--------------------------|---------------------|
| 1 Title                  | ZXQ-18-241          |
| 2 Origin                 | Bruker BioSpin GmbH |
| 3 Solvent                | CDC13               |
| 4 Temperature            | 300.0               |
| 5 Number of Scans        | 42                  |
| 6 Acquisition Time       | 1.3631              |
| 7 Acquisition Date       | 2019-11-09T17:47:18 |
| 8 Spectrometer Frequency | 100.61              |
| 9 Spectral Width         | 24038.5             |

- 158.02
- 144.54
- 136.69
- 134.36
- 133.82
- 130.63
- 129.41
- 128.19
- 126.51
- 123.60
- 113.61
- 109.47
- 86.60
- 83.00
- 79.42
- 77.32
- 77.00
- 76.68
- 68.52
- 55.27
- 42.98
- 36.47
- 33.17
- 23.17
- 21.54
- 15.94

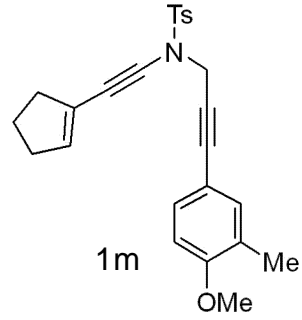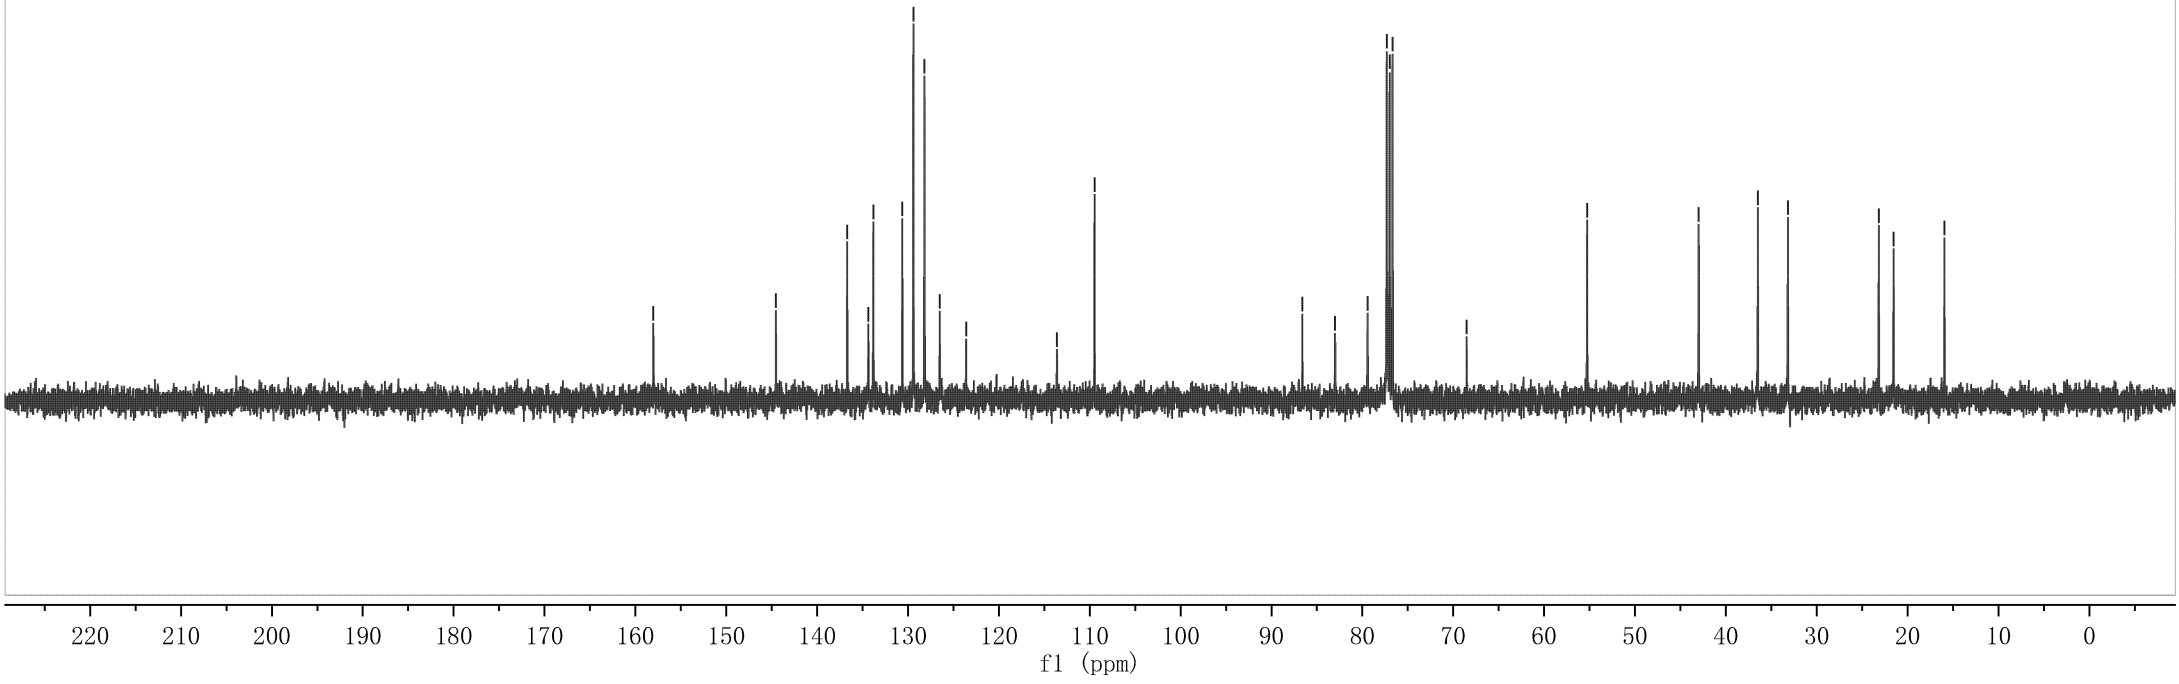

7.878  
7.857  
7.292  
7.278  
7.272  
6.814  
6.814  
6.798  
6.793  
6.755  
6.744  
6.739  
6.734  
6.734  
5.962  
5.957  
5.952  
5.946

4.470

3.866  
3.829

2.452  
2.446  
2.441  
2.428  
2.422  
2.415  
2.409  
2.404  
2.391  
2.385  
2.378  
2.365  
1.917  
1.908  
1.898  
1.879  
1.868  
1.860  
1.860  
1.841

| Parameter                | Value               |
|--------------------------|---------------------|
| 1 Title                  | ZXQ-19-41           |
| 2 Origin                 | Bruker BioSpin GmbH |
| 3 Solvent                | CDC13               |
| 4 Temperature            | 298.0               |
| 5 Number of Scans        | 6                   |
| 6 Acquisition Time       | 4.0894              |
| 7 Acquisition Date       | 2019-11-19T23:17:36 |
| 8 Spectrometer Frequency | 400.13              |
| 9 Spectral Width         | 8012.8              |

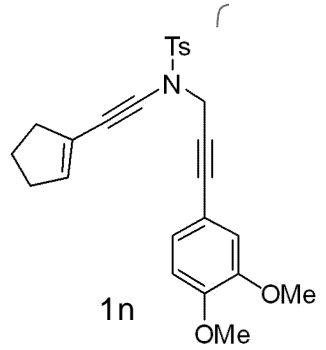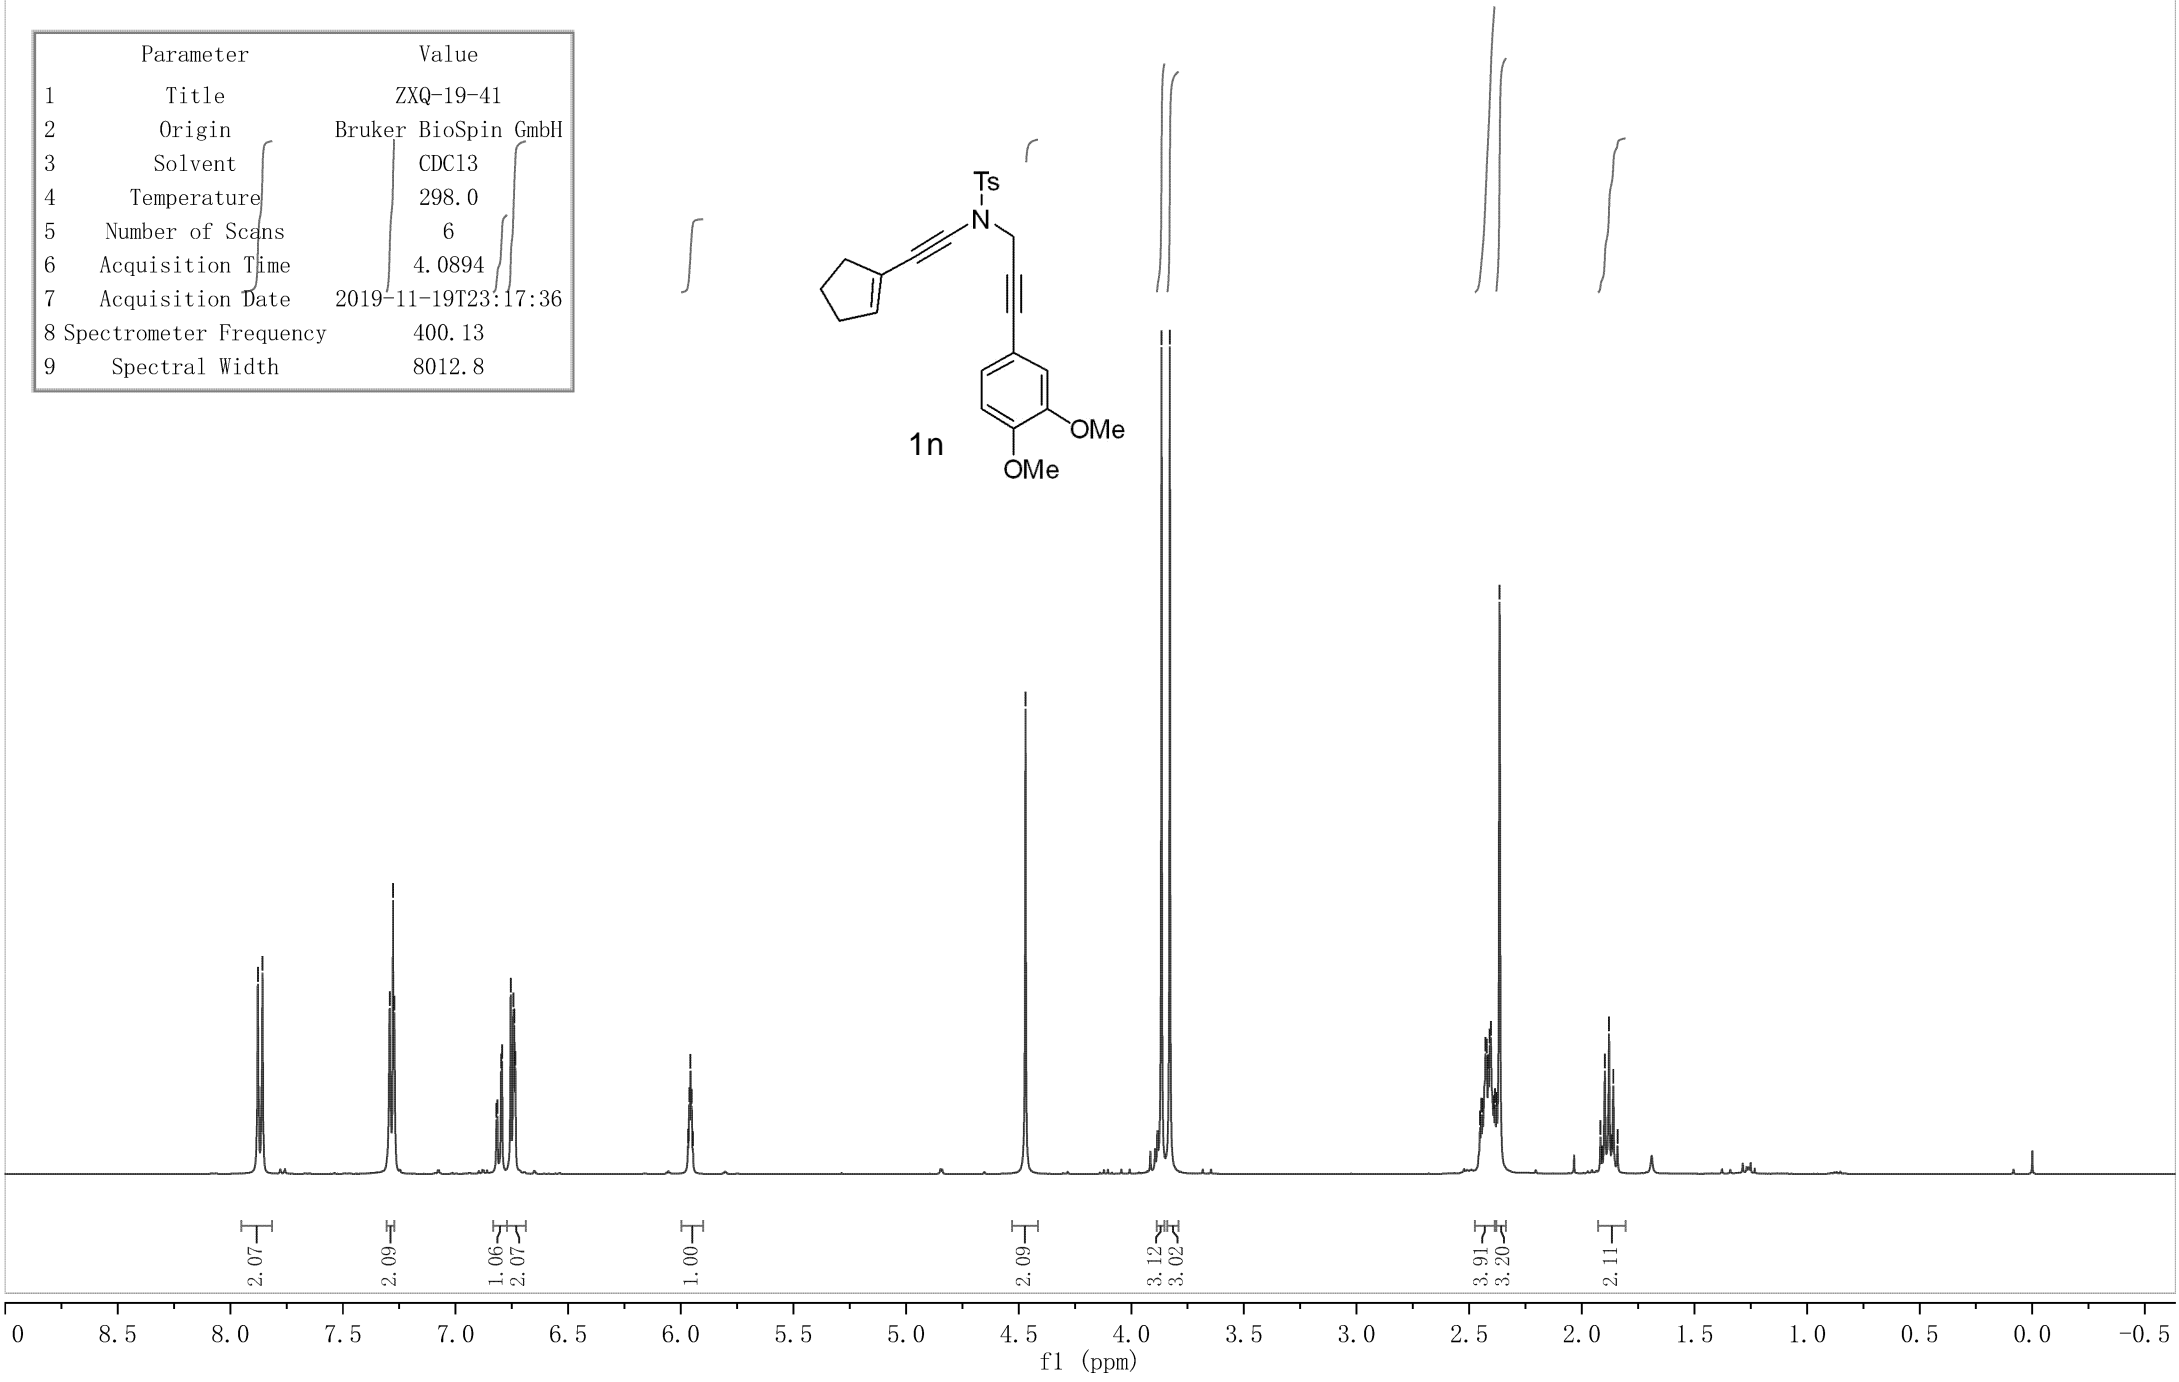

0 8.5 8.0 7.5 7.0 6.5 6.0 5.5 5.0 4.5 4.0 3.5 3.0 2.5 2.0 1.5 1.0 0.5 0.0 -0.5

| Parameter                | Value               |
|--------------------------|---------------------|
| 1 Title                  | ZXQ-19-41-C         |
| 2 Origin                 | Bruker BioSpin GmbH |
| 3 Solvent                | CDC13               |
| 4 Temperature            | 300.0               |
| 5 Number of Scans        | 17                  |
| 6 Acquisition Time       | 1.3631              |
| 7 Acquisition Date       | 2019-11-19T23:19:11 |
| 8 Spectrometer Frequency | 100.61              |
| 9 Spectral Width         | 24038.5             |

- 149.61
- 148.36
- 144.56
- 136.66
- 134.18
- 129.35
- 128.09
- 124.97
- 123.49
- 114.33
- 114.19
- 110.73
- 86.39
- 82.89
- 79.72
- 77.32
- 77.00
- 76.68
- 68.55
- 55.77
- 42.85
- 36.42
- 33.10
- 23.09
- 21.48

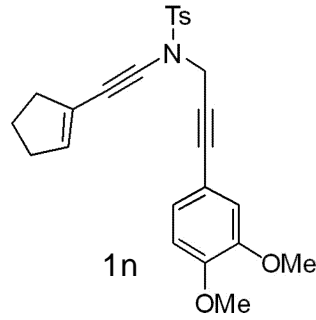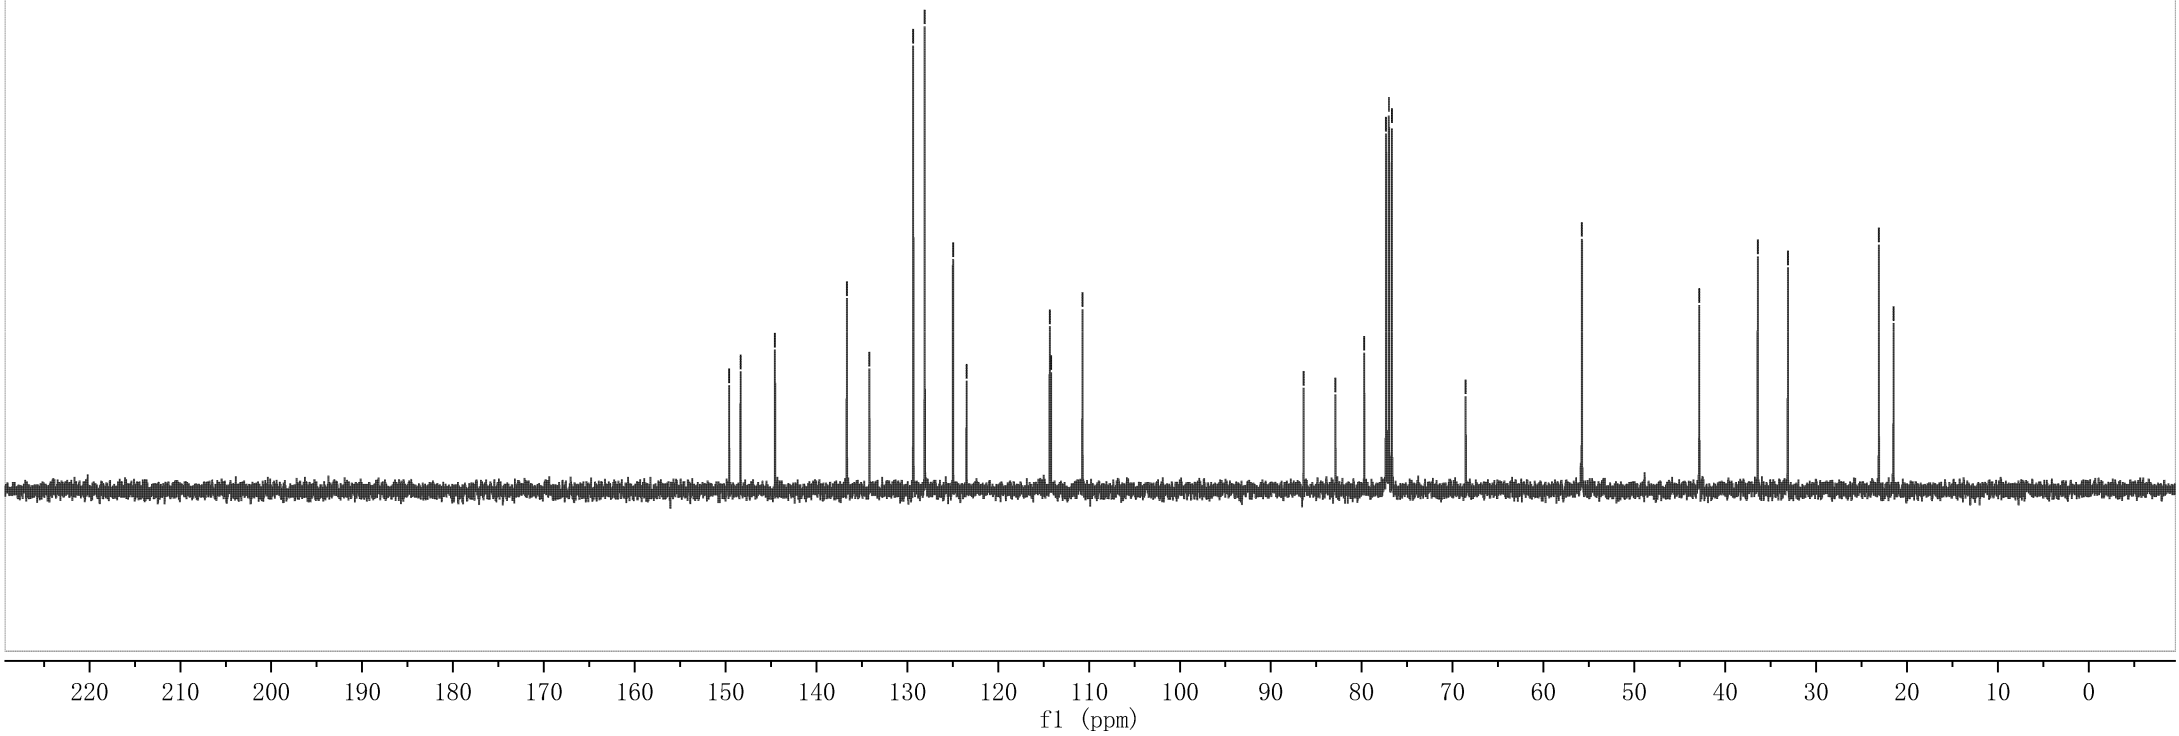

7.873  
7.852  
7.301  
7.281  
6.718  
6.715  
6.698  
6.695  
6.689  
6.669  
6.553  
6.550  
5.967  
5.961  
5.956  
5.949

4.451

2.488  
2.451  
2.446  
2.441  
2.428  
2.422  
2.416  
2.412  
2.408  
2.388  
2.347  
2.323  
1.924  
1.904  
1.886  
1.867  
1.848

| Parameter                | Value               |
|--------------------------|---------------------|
| 1 Title                  | ZXQ-18-215-2        |
| 2 Origin                 | Bruker BioSpin GmbH |
| 3 Solvent                | CDC13               |
| 4 Temperature            | 298.0               |
| 5 Number of Scans        | 8                   |
| 6 Acquisition Time       | 4.0894              |
| 7 Acquisition Date       | 2019-11-04T16:21:23 |
| 8 Spectrometer Frequency | 400.13              |
| 9 Spectral Width         | 8012.8              |

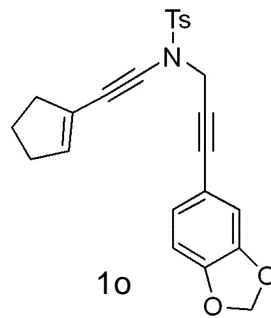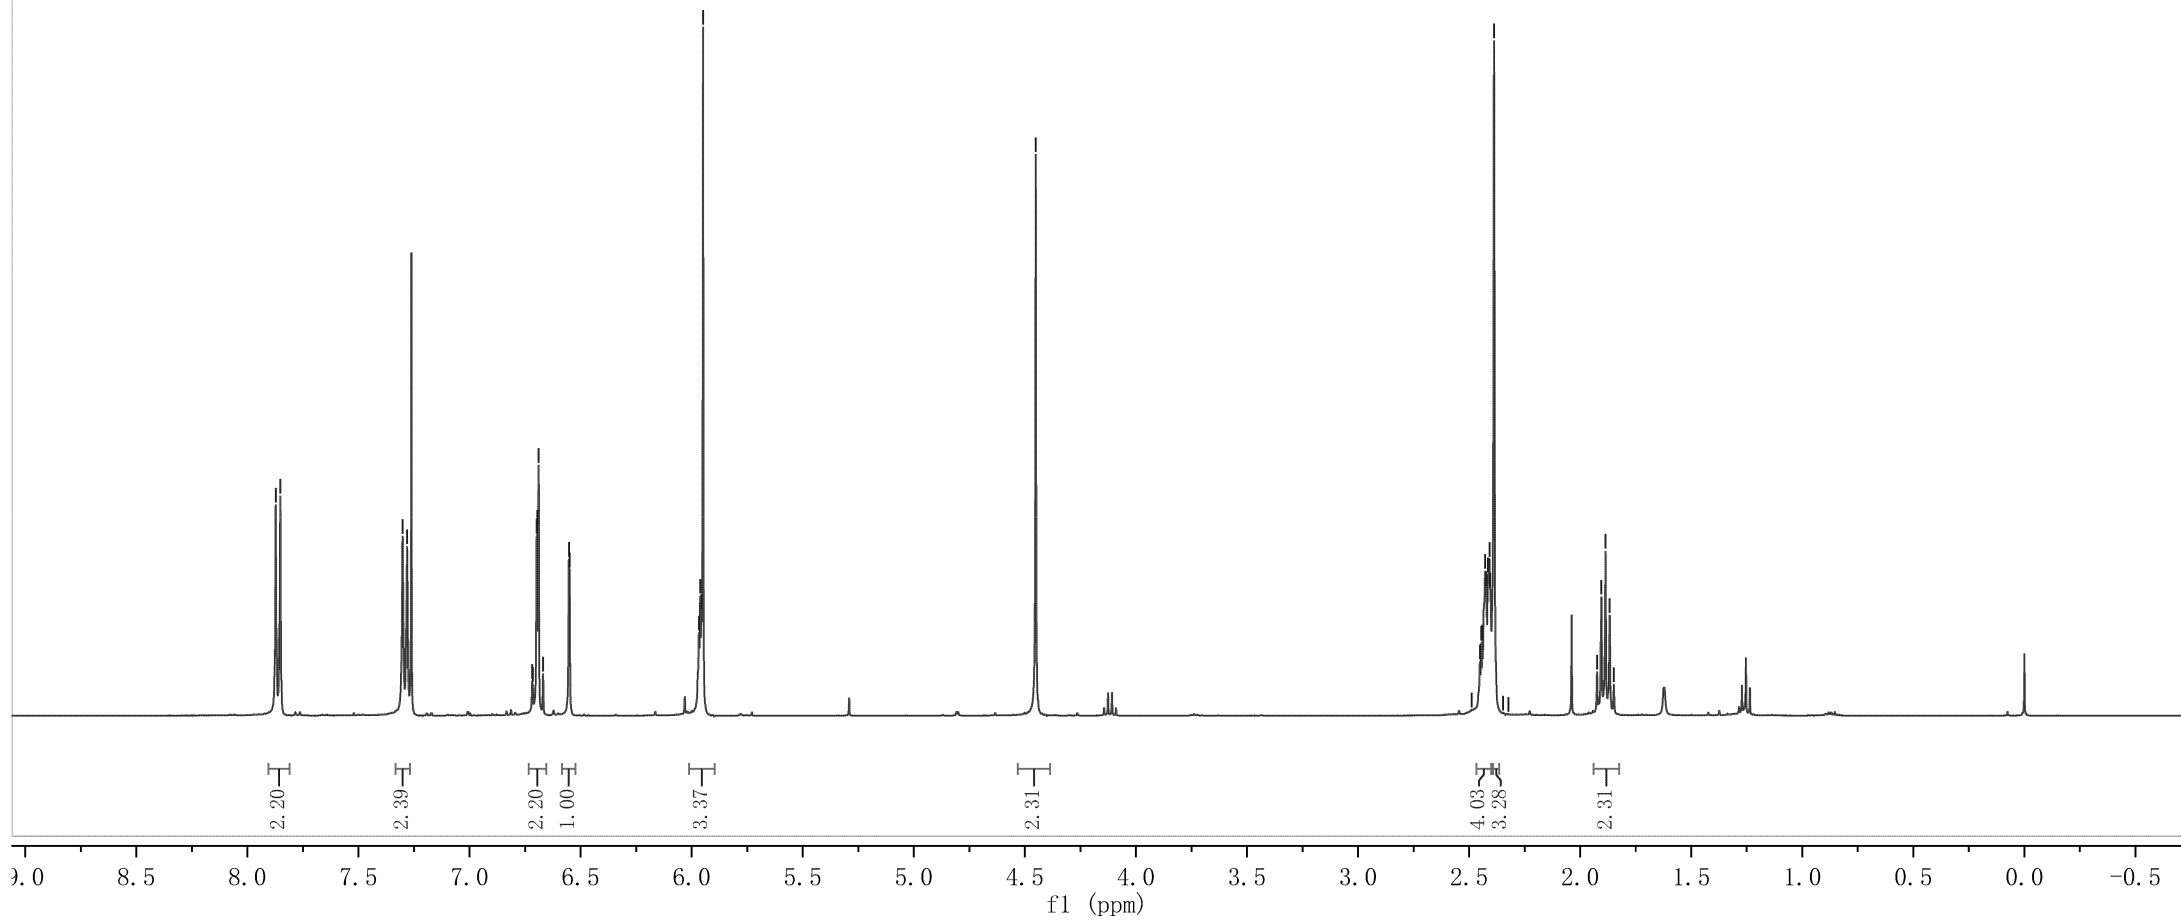

| Parameter                | Value               |
|--------------------------|---------------------|
| 1 Title                  | ZXQ-18-215-C-1      |
| 2 Origin                 | Bruker BioSpin GmbH |
| 3 Solvent                | CDC13               |
| 4 Temperature            | 300.0               |
| 5 Number of Scans        | 26                  |
| 6 Acquisition Time       | 1.3631              |
| 7 Acquisition Date       | 2019-11-04T16:23:53 |
| 8 Spectrometer Frequency | 100.61              |
| 9 Spectral Width         | 24038.5             |

148.02 147.18 144.68 136.86 134.34 129.46 128.18 126.27 123.54 115.27 111.58 108.19 101.28 86.20 82.91 79.59 77.32 77.00 76.68 68.55 42.86 36.48 33.18 23.17 21.51

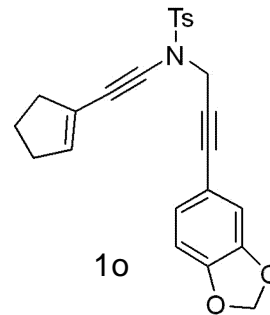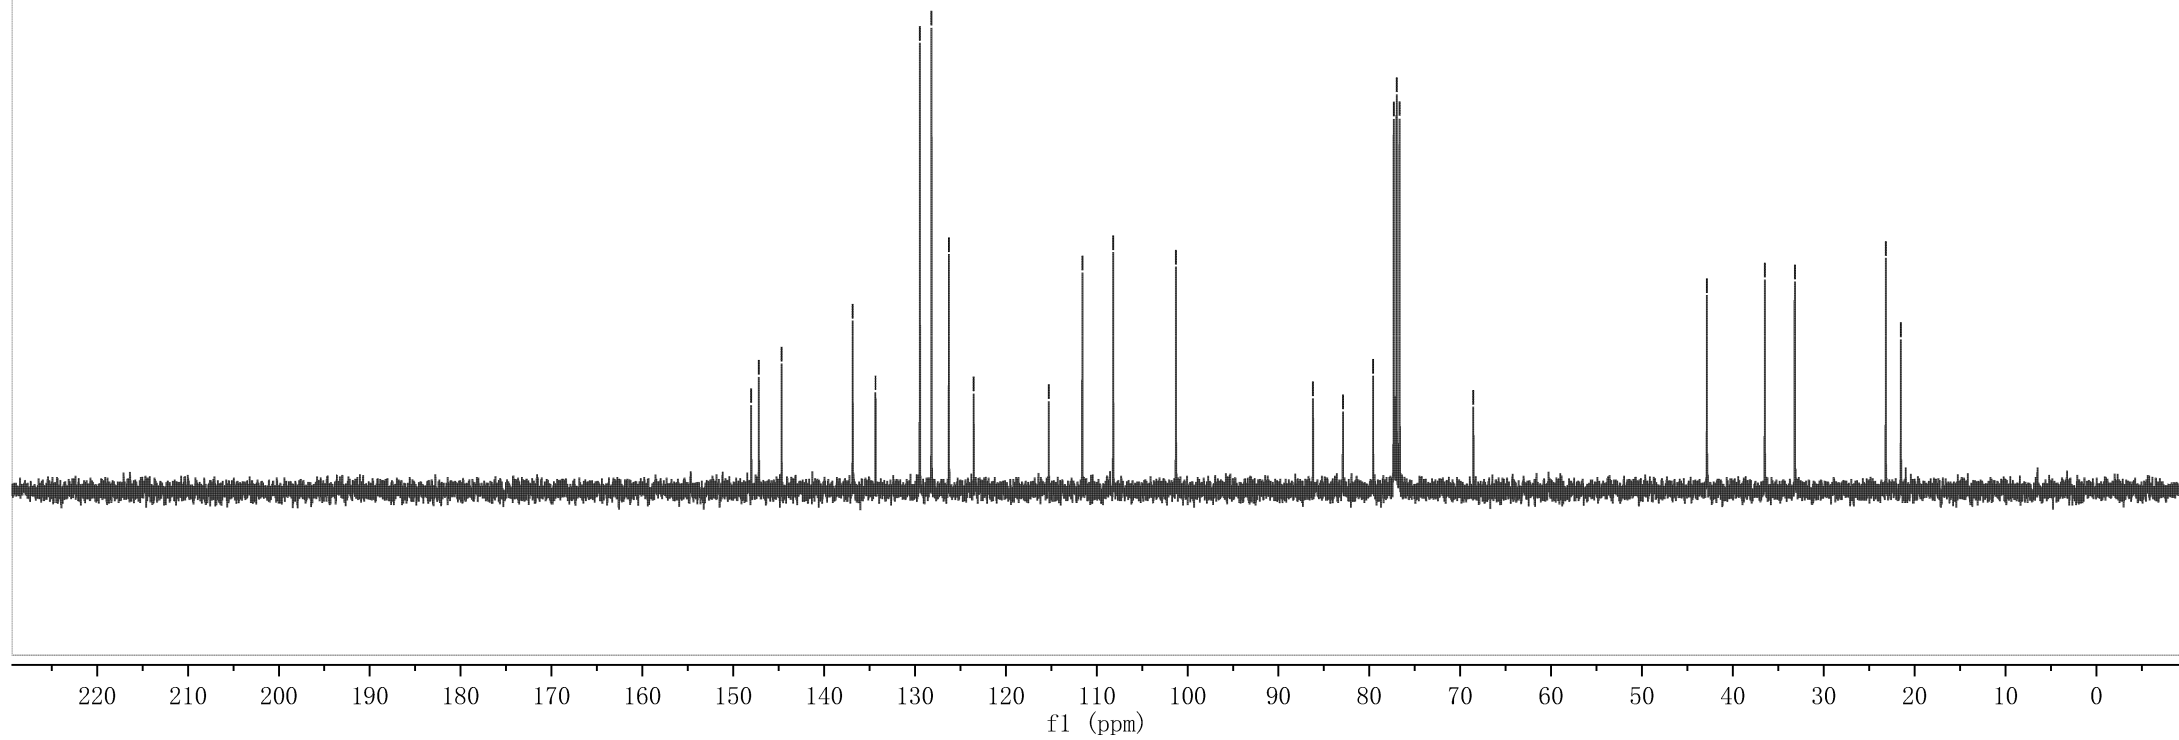

| Parameter                | Value               |
|--------------------------|---------------------|
| 1 Title                  | ZXQ-19-161          |
| 2 Origin                 | Bruker BioSpin GmbH |
| 3 Solvent                | CDC13               |
| 4 Temperature            | 298.0               |
| 5 Number of Scans        | 6                   |
| 6 Acquisition Time       | 4.0894              |
| 7 Acquisition Date       | 2019-12-25T16:31:51 |
| 8 Spectrometer Frequency | 400.13              |
| 9 Spectral Width         | 8012.8              |

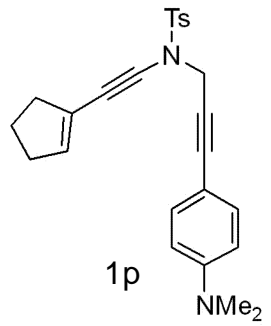

7.872  
7.851  
7.278  
7.258  
7.247  
7.060  
7.055  
7.043  
7.038  
6.550  
6.545  
6.533  
6.528  
5.950  
5.945  
5.940  
4.466  
2.942  
2.422  
2.416  
2.408  
2.403  
2.398  
2.385  
2.379  
2.365  
1.904  
1.891  
1.873  
1.862  
1.853  
1.835

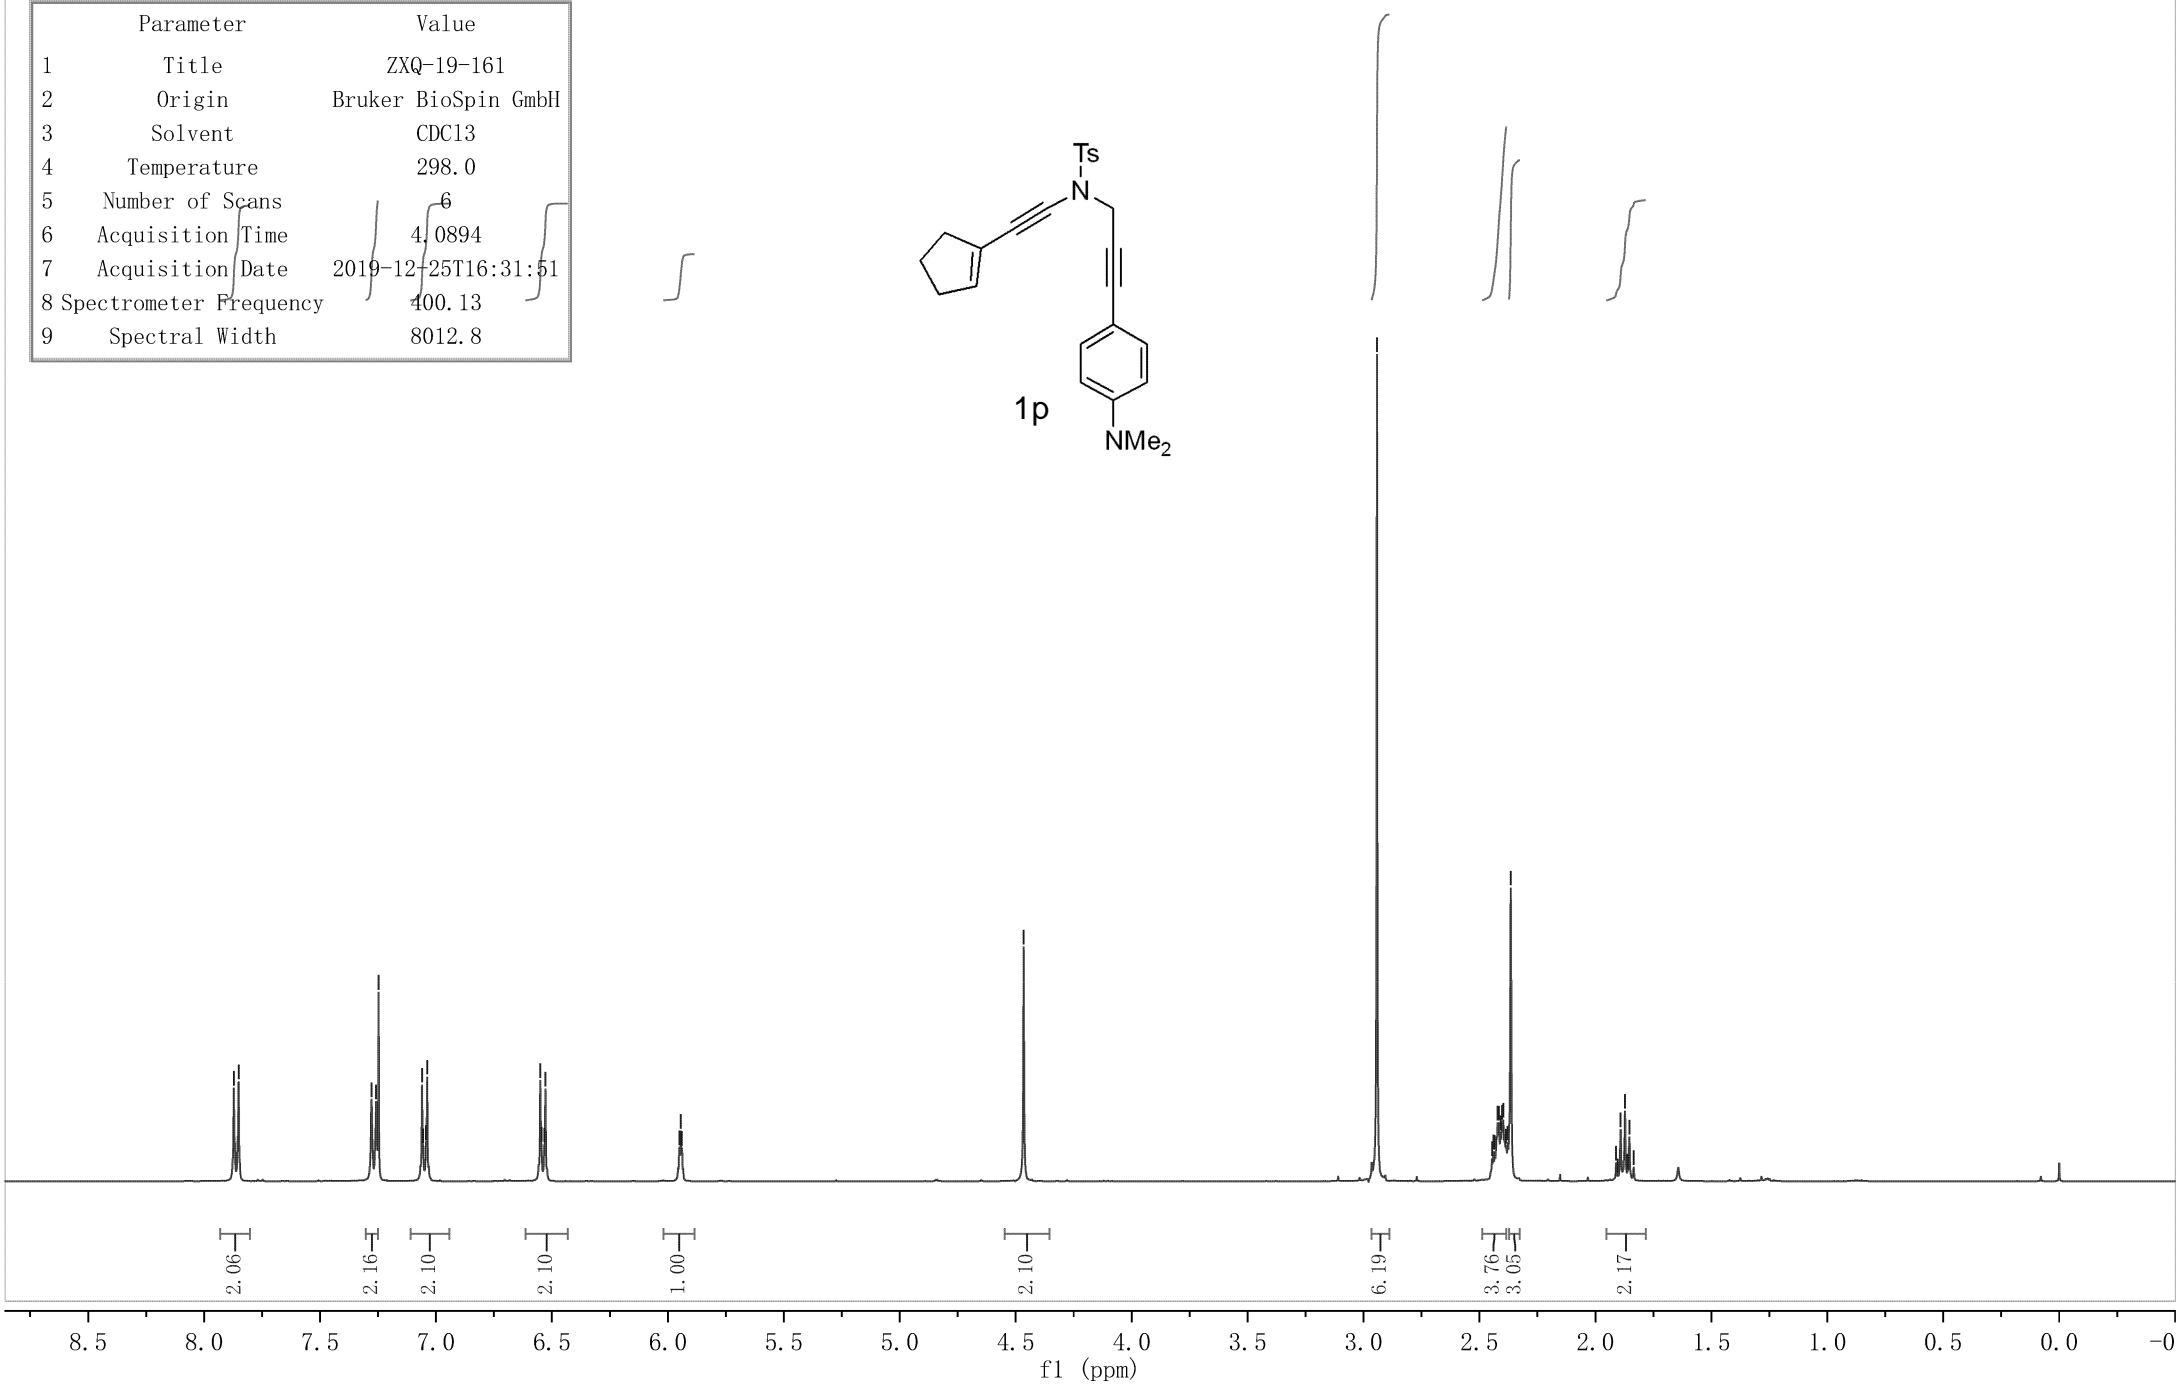

| Parameter                | Value               |
|--------------------------|---------------------|
| 1 Title                  | ZXQ-19-161-C        |
| 2 Origin                 | Bruker BioSpin GmbH |
| 3 Solvent                | CDC13               |
| 4 Temperature            | 300.0               |
| 5 Number of Scans        | 26                  |
| 6 Acquisition Time       | 1.3631              |
| 7 Acquisition Date       | 2019-12-25T16:33:25 |
| 8 Spectrometer Frequency | 100.61              |
| 9 Spectral Width         | 24038.5             |

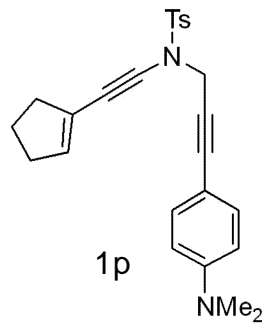

150.14    144.52    136.54    134.30    132.71    129.38    128.12    123.61    111.41    108.74    87.44    83.07    78.76    77.32    77.00    76.68    68.46    43.17    40.05    36.45    33.14    23.14    21.53

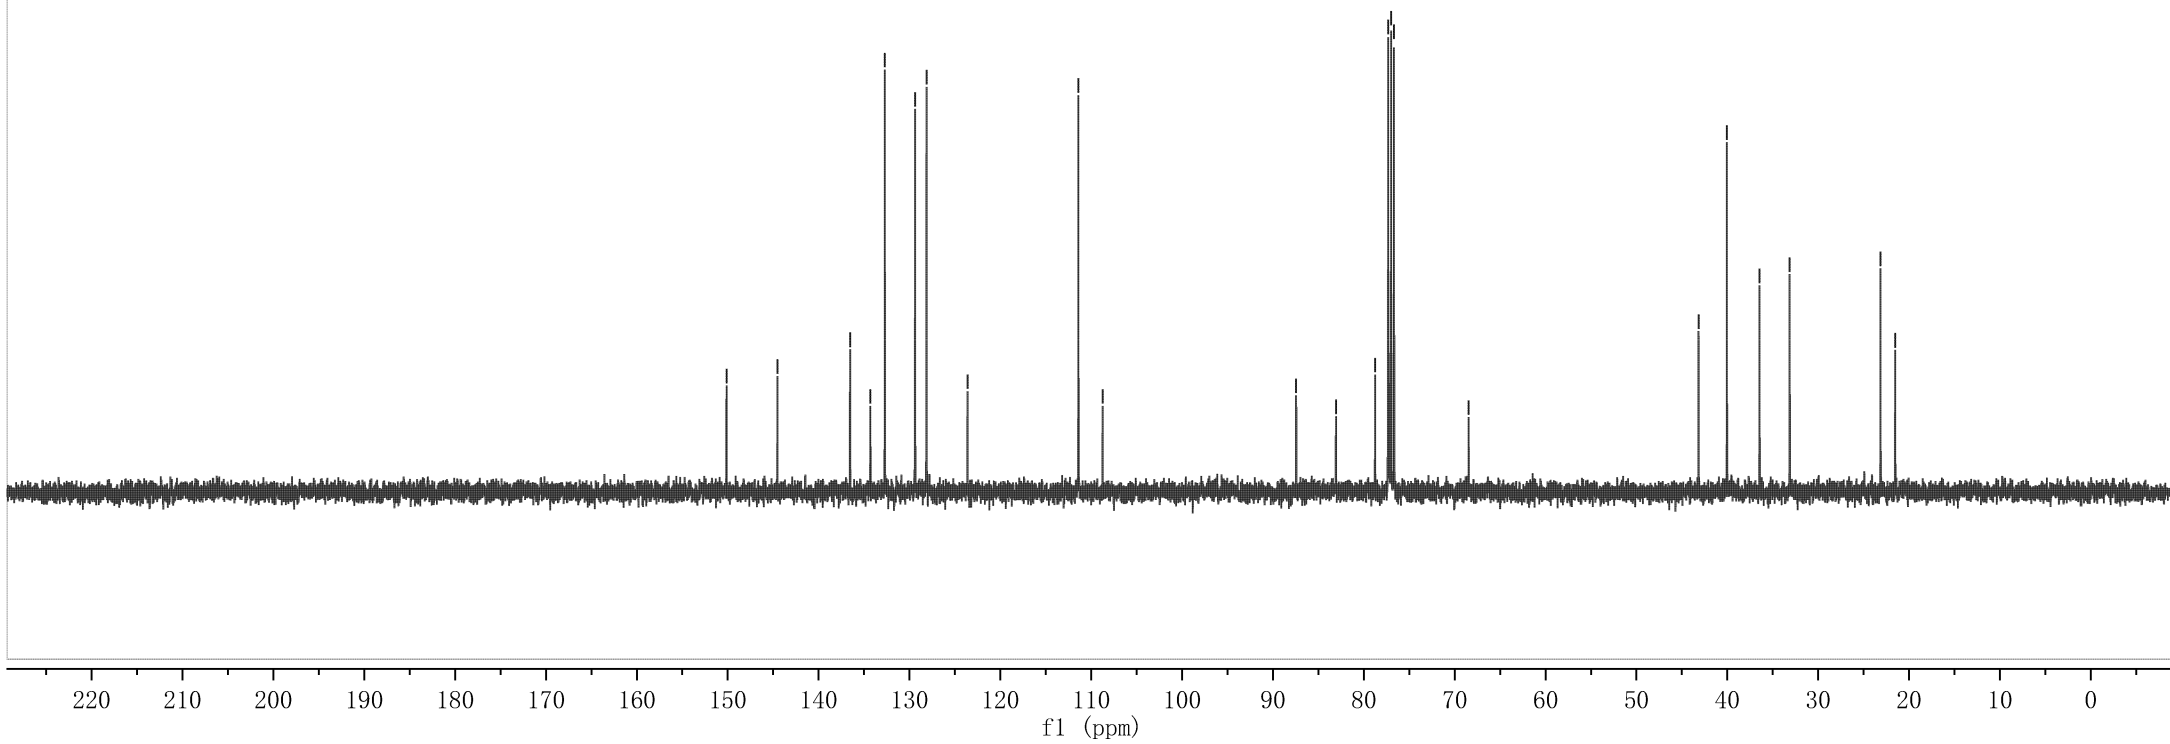

| Parameter                | Value               |
|--------------------------|---------------------|
| 1 Title                  | ZXQ-21-46           |
| 2 Origin                 | Bruker BioSpin GmbH |
| 3 Solvent                | CDC13               |
| 4 Temperature            | 298.0               |
| 5 Number of Scans        | 6                   |
| 6 Acquisition Time       | 4.0894              |
| 7 Acquisition Date       | 2020-06-18 11:02:27 |
| 8 Spectrometer Frequency | 400.13              |
| 9 Spectral Width         | 8012.8              |

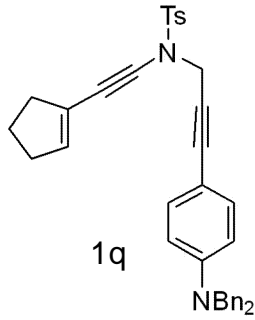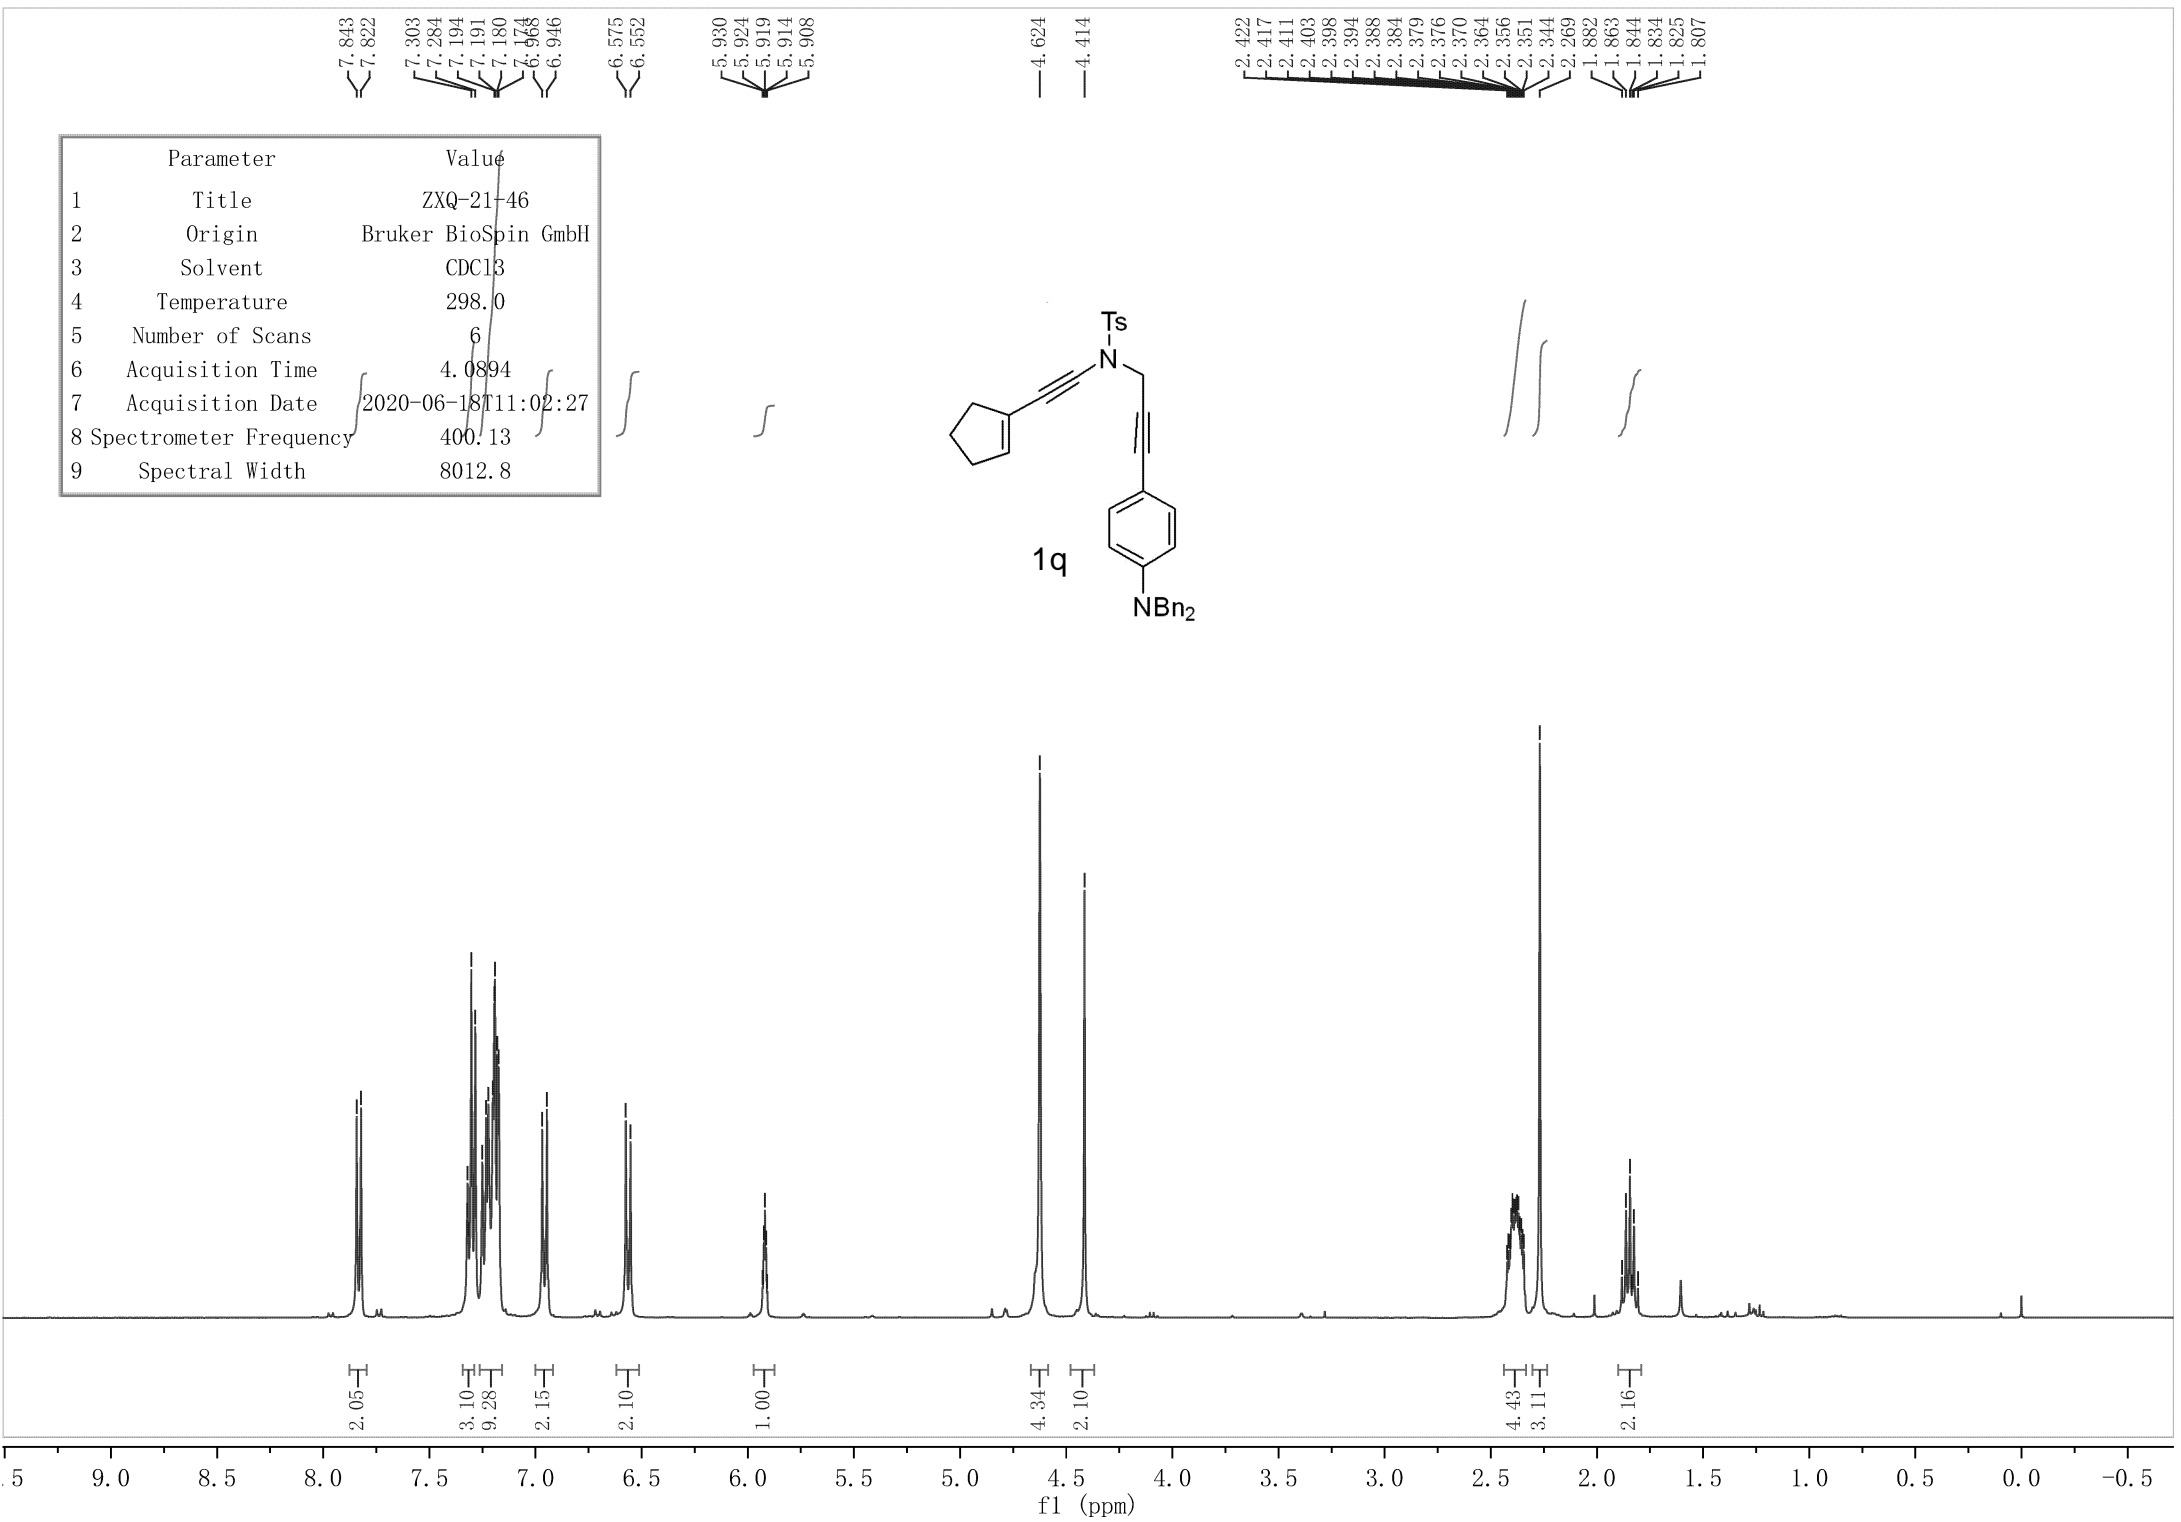



| Parameter                | Value               |
|--------------------------|---------------------|
| 1 Title                  | ZXQ-21-46-C         |
| 2 Origin                 | Bruker BioSpin GmbH |
| 3 Solvent                | CDC13               |
| 4 Temperature            | 300.0               |
| 5 Number of Scans        | 10                  |
| 6 Acquisition Time       | 1.3631              |
| 7 Acquisition Date       | 2020-06-18T11:03:43 |
| 8 Spectrometer Frequency | 100.61              |
| 9 Spectral Width         | 24038.5             |

- 148.88
- 144.46
- 137.71
- 136.51
- 134.26
- 132.84
- 129.32
- 128.62
- 128.05
- 126.99
- 126.35
- 123.55
- 111.71
- 109.39
- 87.16
- 83.05
- 78.87
- 77.32
- 77.00
- 76.68
- 68.40
- 54.03
- 43.06
- 36.41
- 33.09
- 23.09
- 21.42

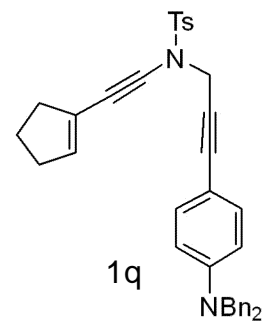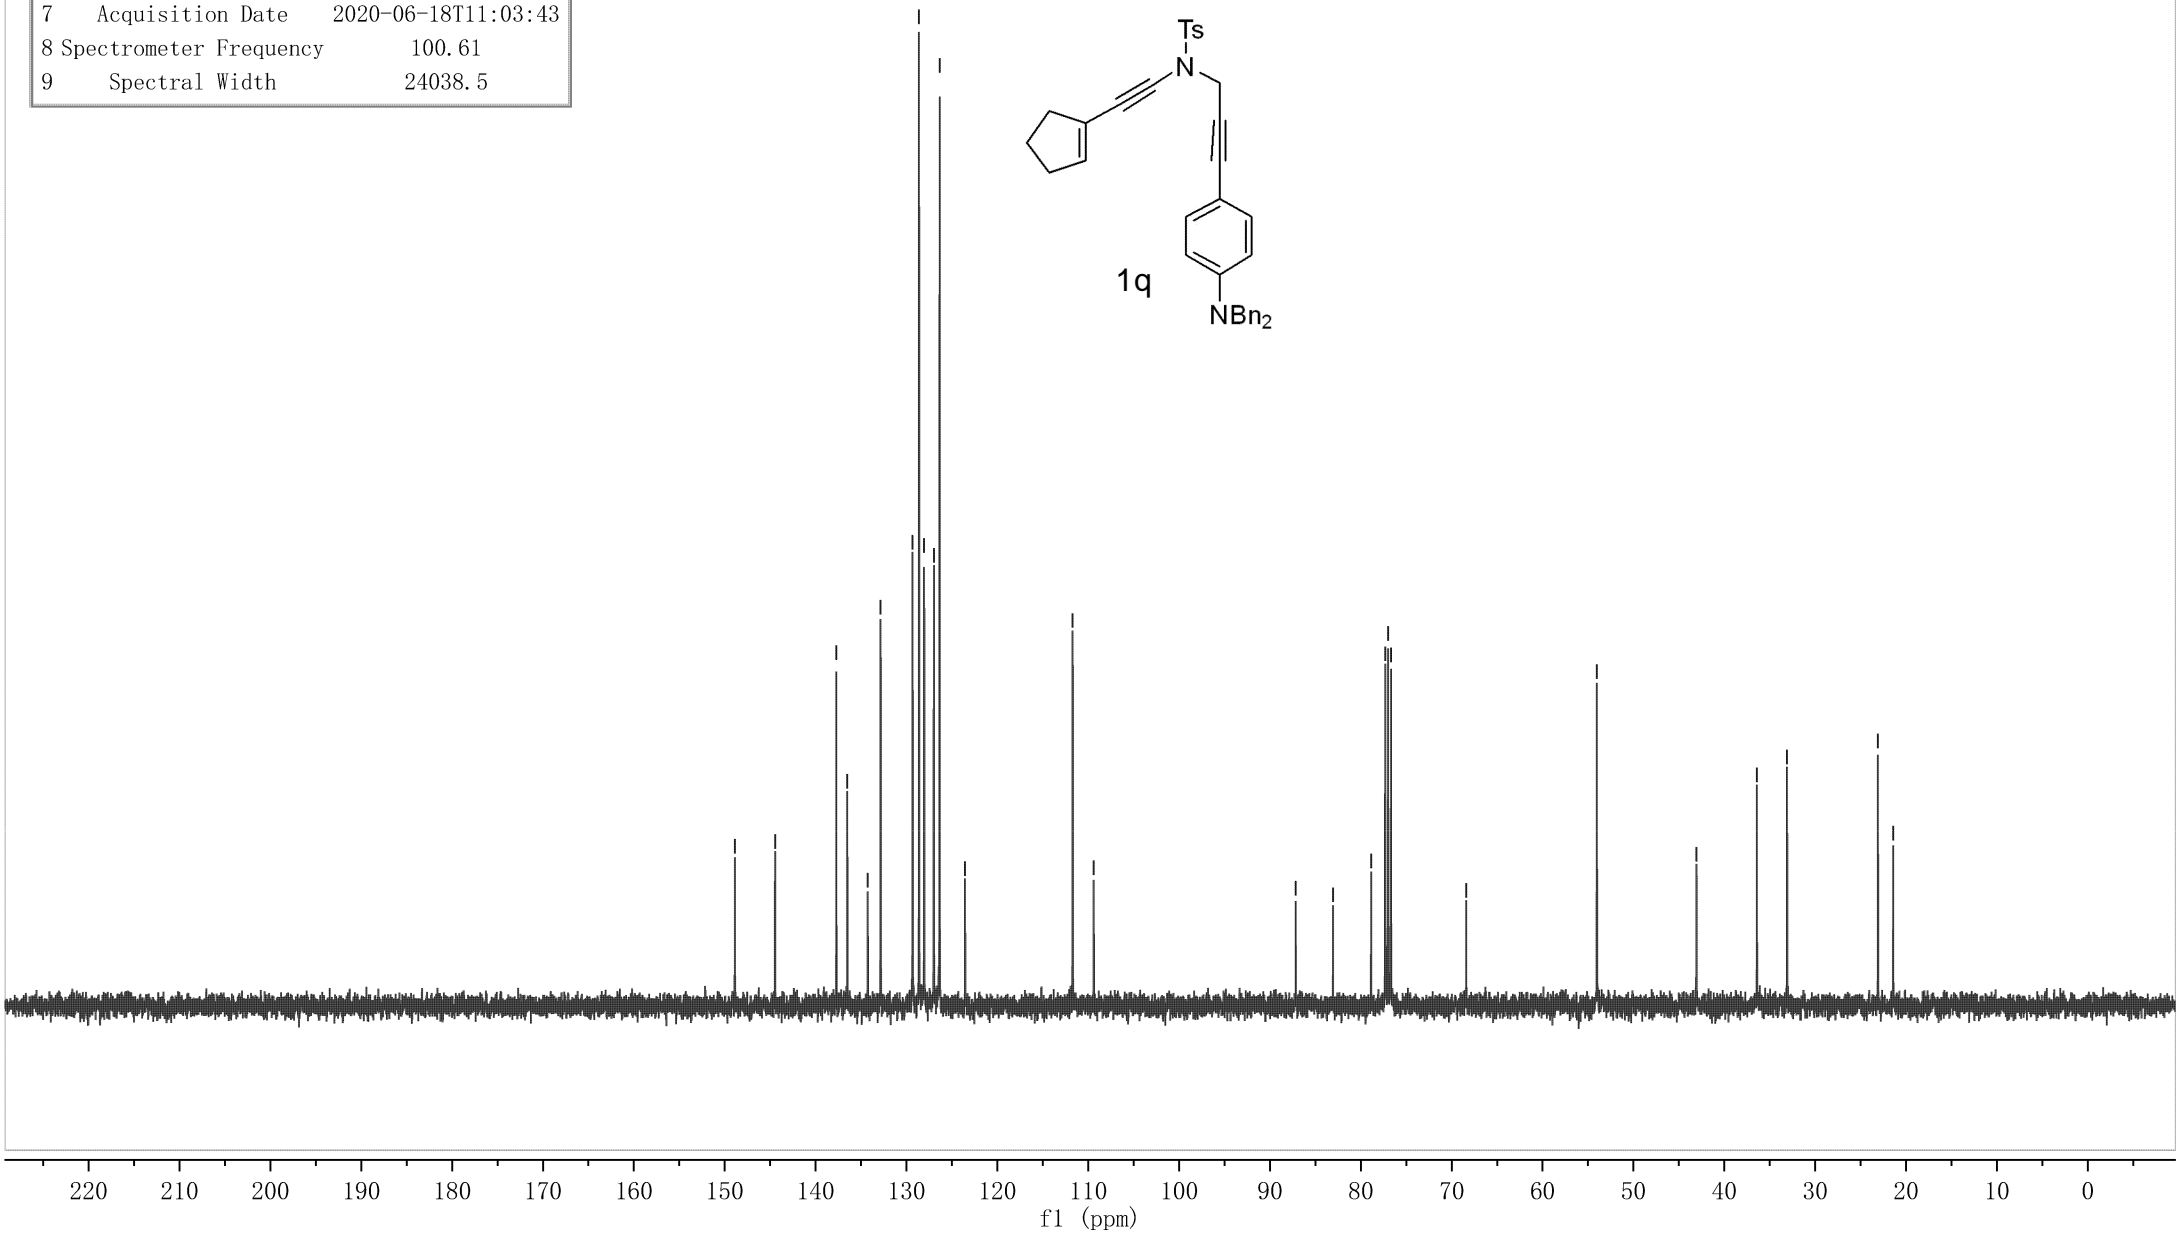

| Parameter                | Value               |
|--------------------------|---------------------|
| 1 Title                  | ZXQ-21-84           |
| 2 Origin                 | Bruker BioSpin GmbH |
| 3 Solvent                | CDC13               |
| 4 Temperature            | 300.9               |
| 5 Number of Scans        | 7                   |
| 6 Acquisition Time       | 3.9846              |
| 7 Acquisition Date       | 2020-06-27T16:35:35 |
| 8 Spectrometer Frequency | 400.03              |
| 9 Spectral Width         | 8223.7              |

7.844  
7.824  
7.235  
7.214  
7.138  
7.103  
7.082  
6.975  
6.953  
6.854  
6.847  
6.826  
6.593  
6.570

5.932  
5.926  
5.921  
5.916  
5.910

4.535  
4.421

3.751

2.425  
2.419  
2.414  
2.404  
2.400  
2.397  
2.391  
2.386  
2.379  
2.373  
2.367  
2.361  
2.354  
2.347  
2.286  
1.886  
1.866  
1.848  
1.829  
1.810

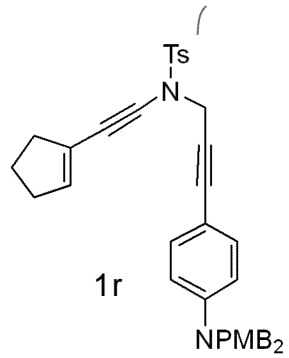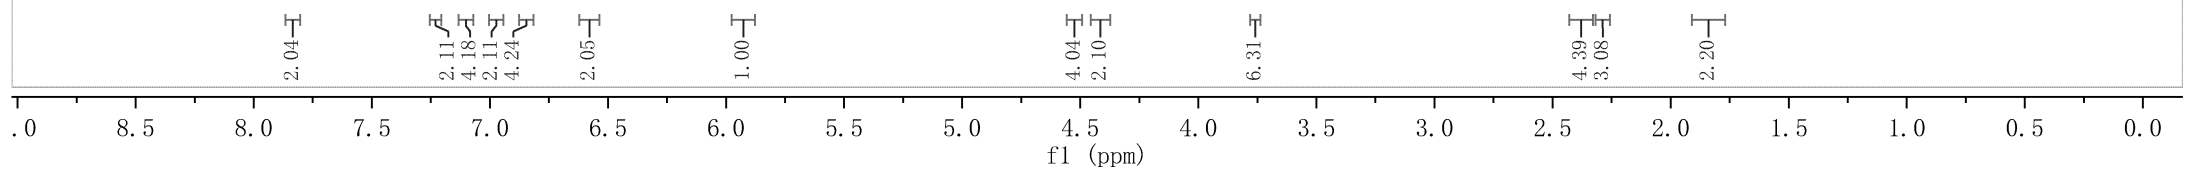

| Parameter                | Value               |
|--------------------------|---------------------|
| 1 Title                  | ZXQ-21-84-C         |
| 2 Origin                 | Bruker BioSpin GmbH |
| 3 Solvent                | CDC13               |
| 4 Temperature            | 301.0               |
| 5 Number of Scans        | 20                  |
| 6 Acquisition Time       | 1.3631              |
| 7 Acquisition Date       | 2020-06-27T16:38:36 |
| 8 Spectrometer Frequency | 100.59              |
| 9 Spectral Width         | 24038.5             |

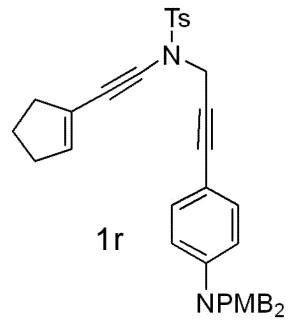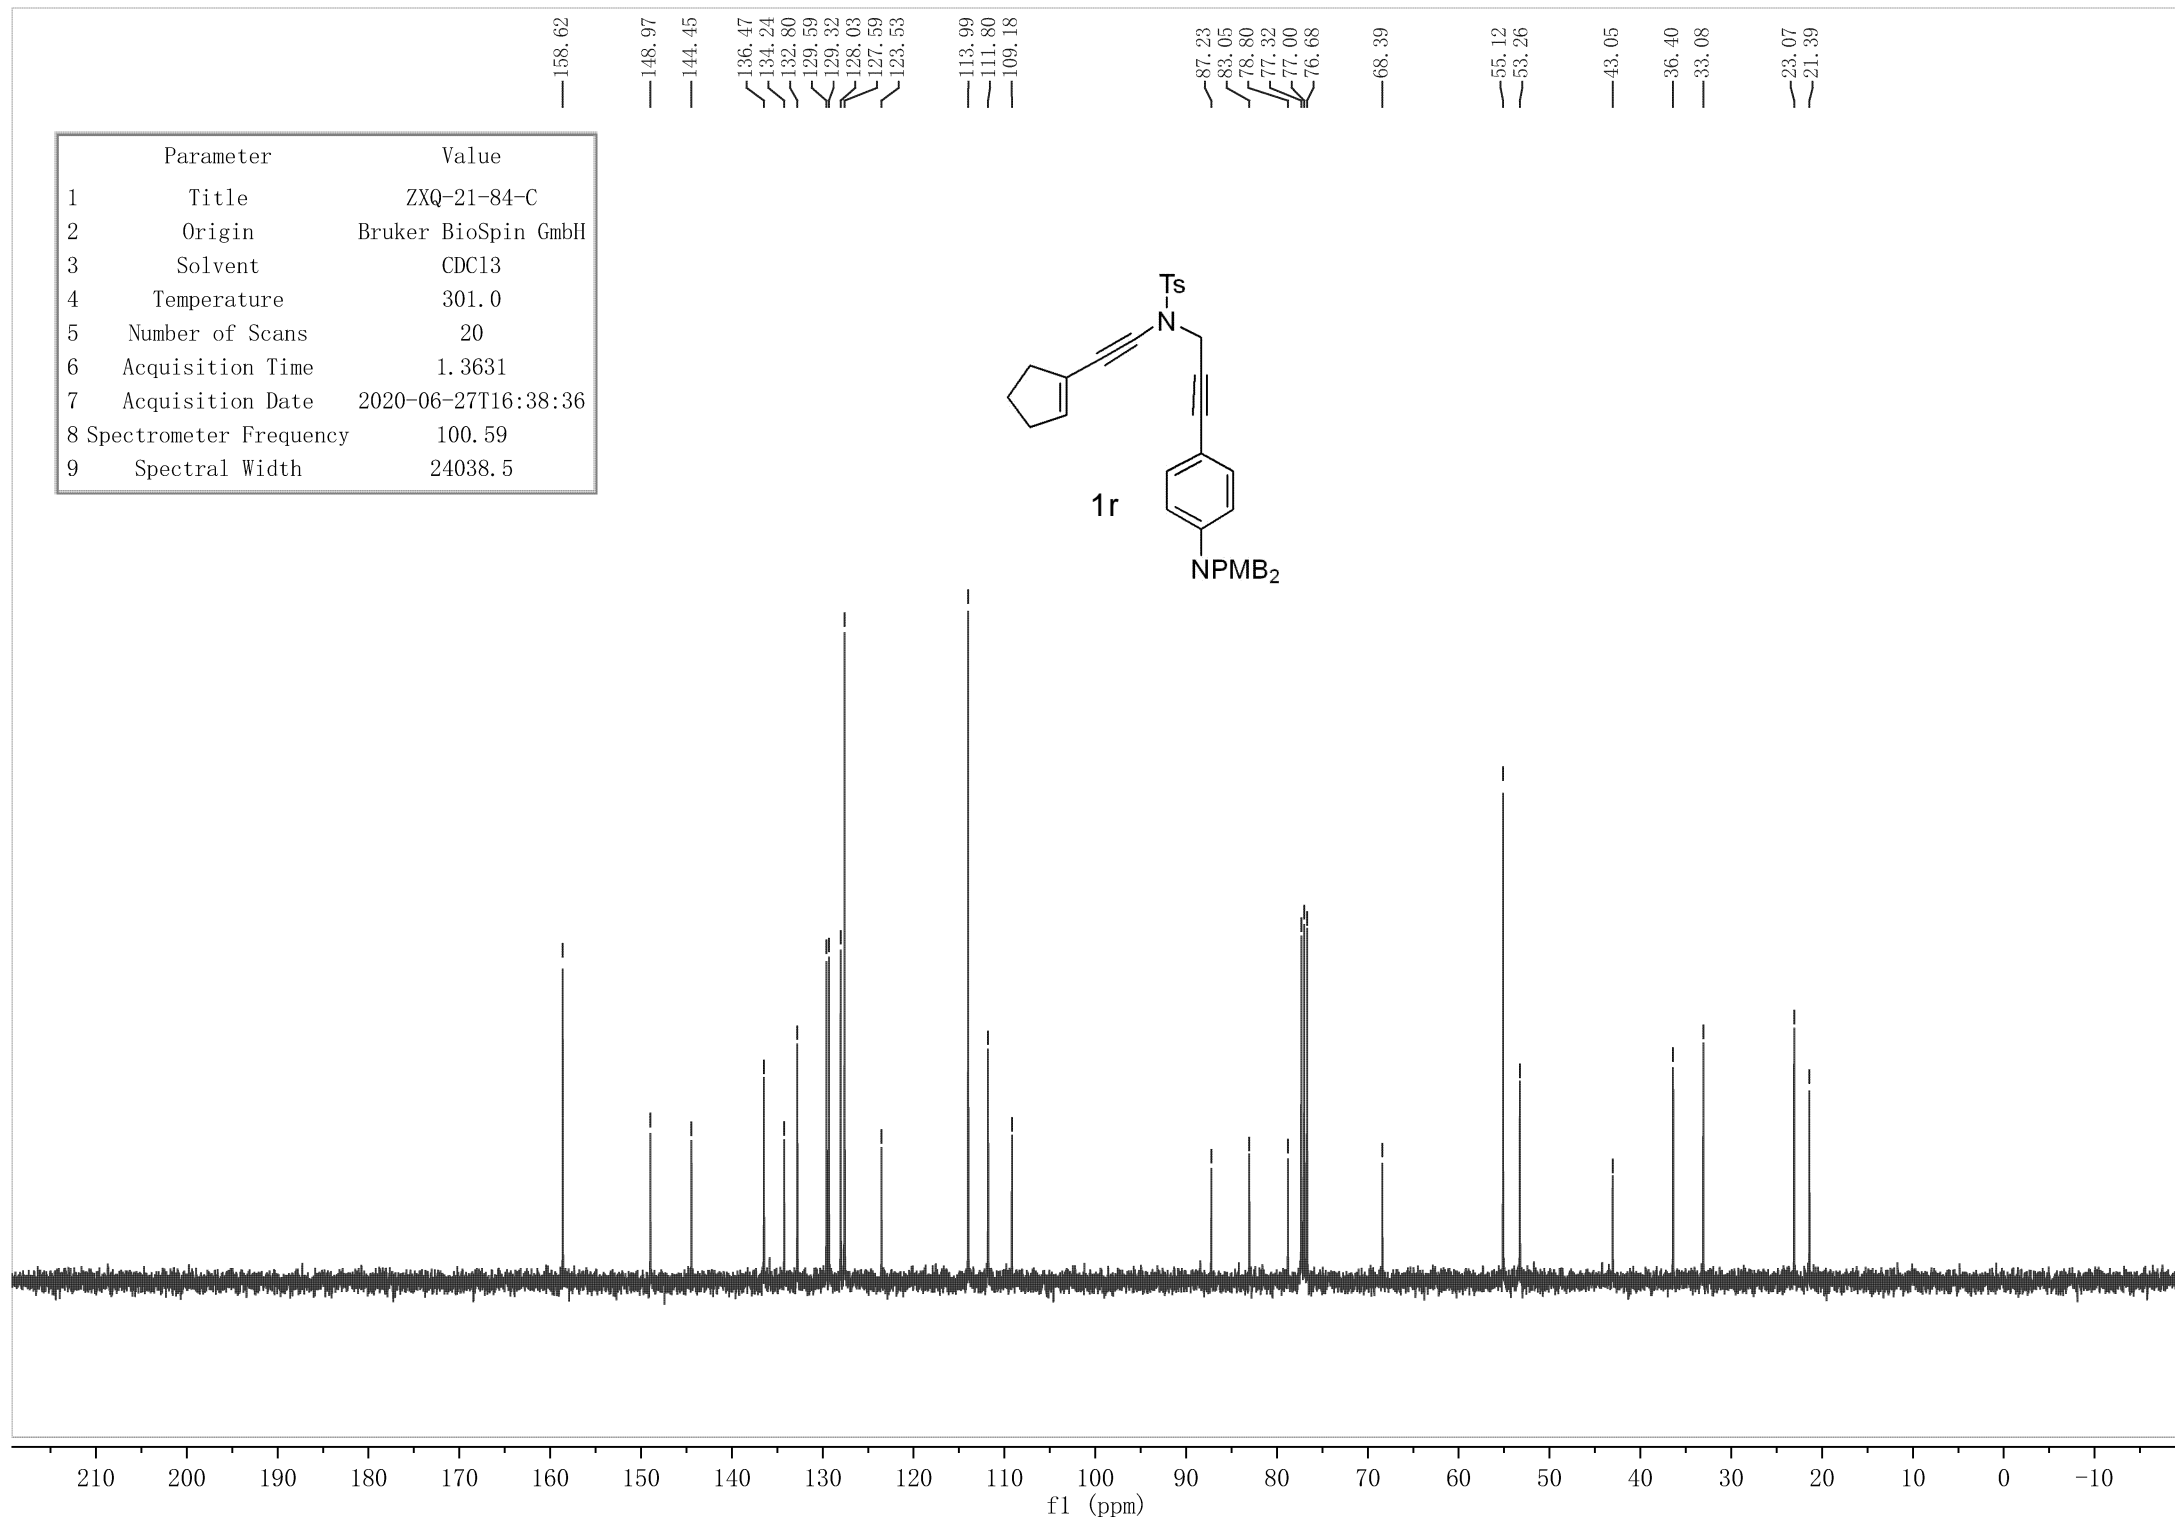

7.869  
7.848  
7.281  
7.260  
7.113  
7.108  
7.091  
7.076  
7.059  
7.055

5.963  
5.958  
5.954

4.468

2.488  
2.462  
2.455  
2.441  
2.436  
2.428  
2.422  
2.417  
2.409  
2.404  
2.391  
2.385  
2.379  
2.356  
1.917  
1.898  
1.879  
1.860  
1.842

| Parameter                | Value               |
|--------------------------|---------------------|
| 1 Title                  | ZXQ-19-39           |
| 2 Origin                 | Bruker BioSpin GmbH |
| 3 Solvent                | CDC13               |
| 4 Temperature            | 298.0               |
| 5 Number of Scans        | 11                  |
| 6 Acquisition Time       | 4.0894              |
| 7 Acquisition Date       | 2019-11-19T16:14:26 |
| 8 Spectrometer Frequency | 400.13              |
| 9 Spectral Width         | 8012.8              |

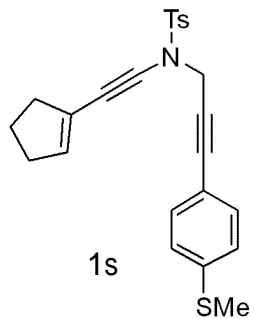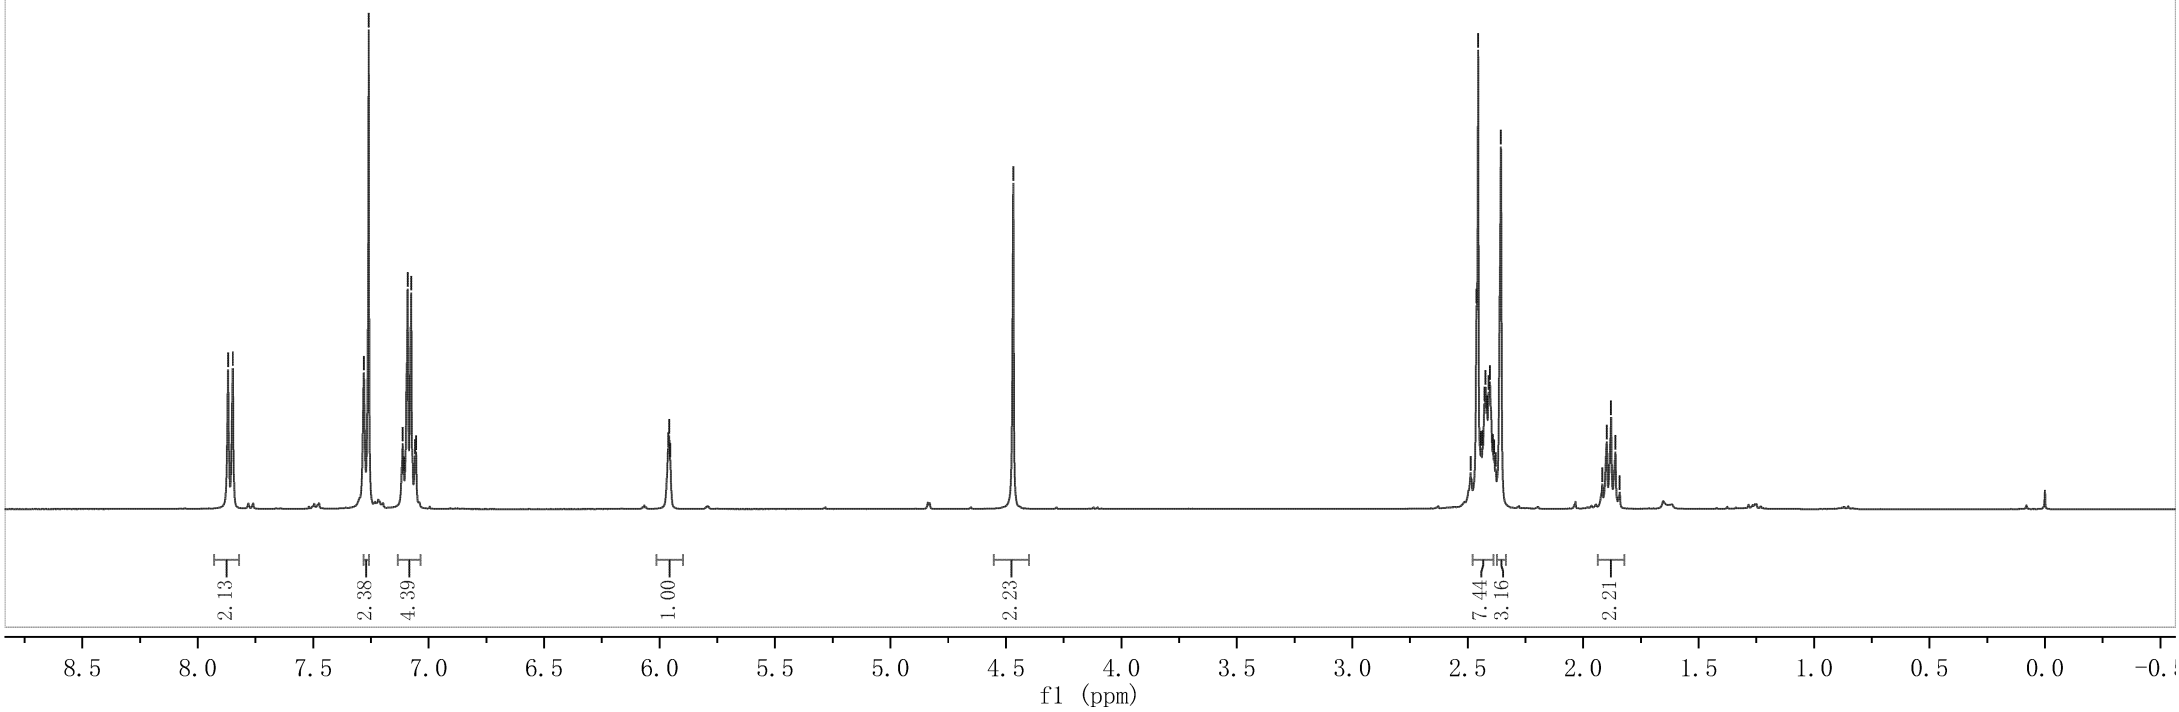

| Parameter                | Value               |
|--------------------------|---------------------|
| 1 Title                  | ZXQ-19-39-C         |
| 2 Origin                 | Bruker BioSpin GmbH |
| 3 Solvent                | CDC13               |
| 4 Temperature            | 300.0               |
| 5 Number of Scans        | 29                  |
| 6 Acquisition Time       | 1.3631              |
| 7 Acquisition Date       | 2019-11-19T16:16:28 |
| 8 Spectrometer Frequency | 100.61              |
| 9 Spectral Width         | 24038.5             |

144.64  
139.75  
136.84  
134.20  
131.82  
129.40  
128.12  
125.45  
123.47  
118.21

86.06  
82.86  
81.25  
77.32  
77.00  
76.68  
68.55

42.84  
36.44  
33.14

23.12  
21.49  
15.17

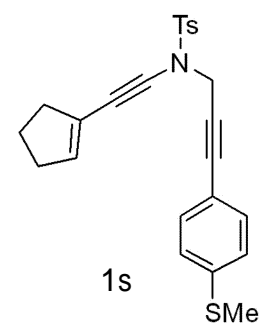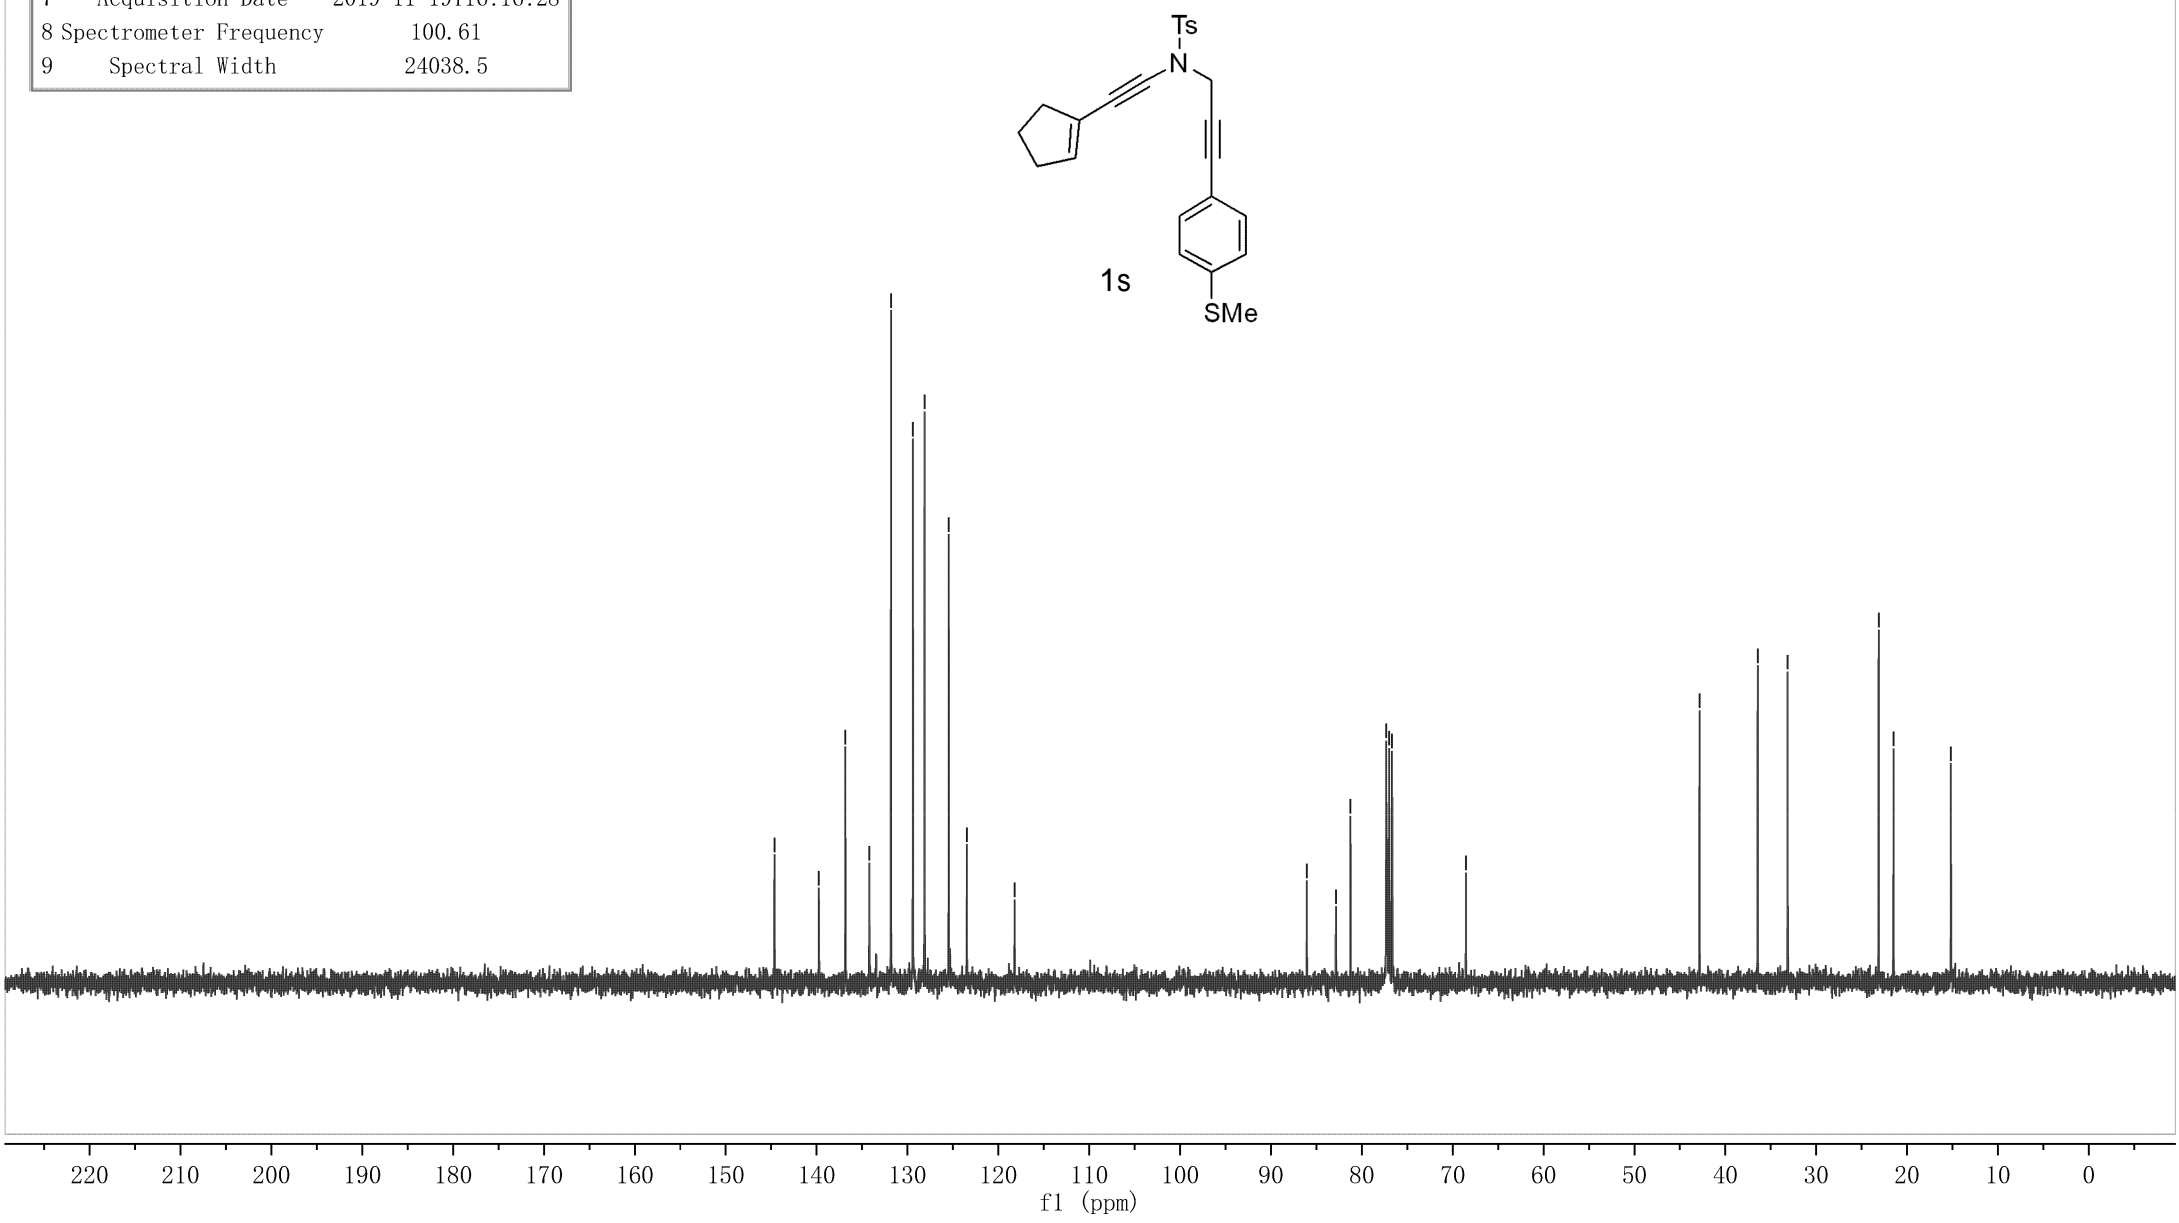

| Parameter                | Value               |
|--------------------------|---------------------|
| 1 Title                  | ZXQ-18-225          |
| 2 Origin                 | Bruker BioSpin GmbH |
| 3 Solvent                | CDCl3               |
| 4 Temperature            | 298.0               |
| 5 Number of Scans        | 5                   |
| 6 Acquisition Time       | 4.0894              |
| 7 Acquisition Date       | 2019-11-06T11:26:18 |
| 8 Spectrometer Frequency | 400.13              |
| 9 Spectral Width         | 8012.8              |

7.876  
7.855

7.281  
7.260  
7.255  
7.094  
7.055  
7.055  
7.036

5.971  
5.965  
5.960  
5.955  
5.950

4.472

2.451  
2.446  
2.441  
2.433  
2.427  
2.421  
2.414  
2.408  
2.404  
2.395  
2.390  
2.383  
2.377  
2.359  
2.325  
1.922  
1.914  
1.902  
1.884  
1.873  
1.865  
1.846

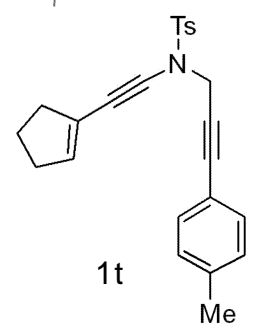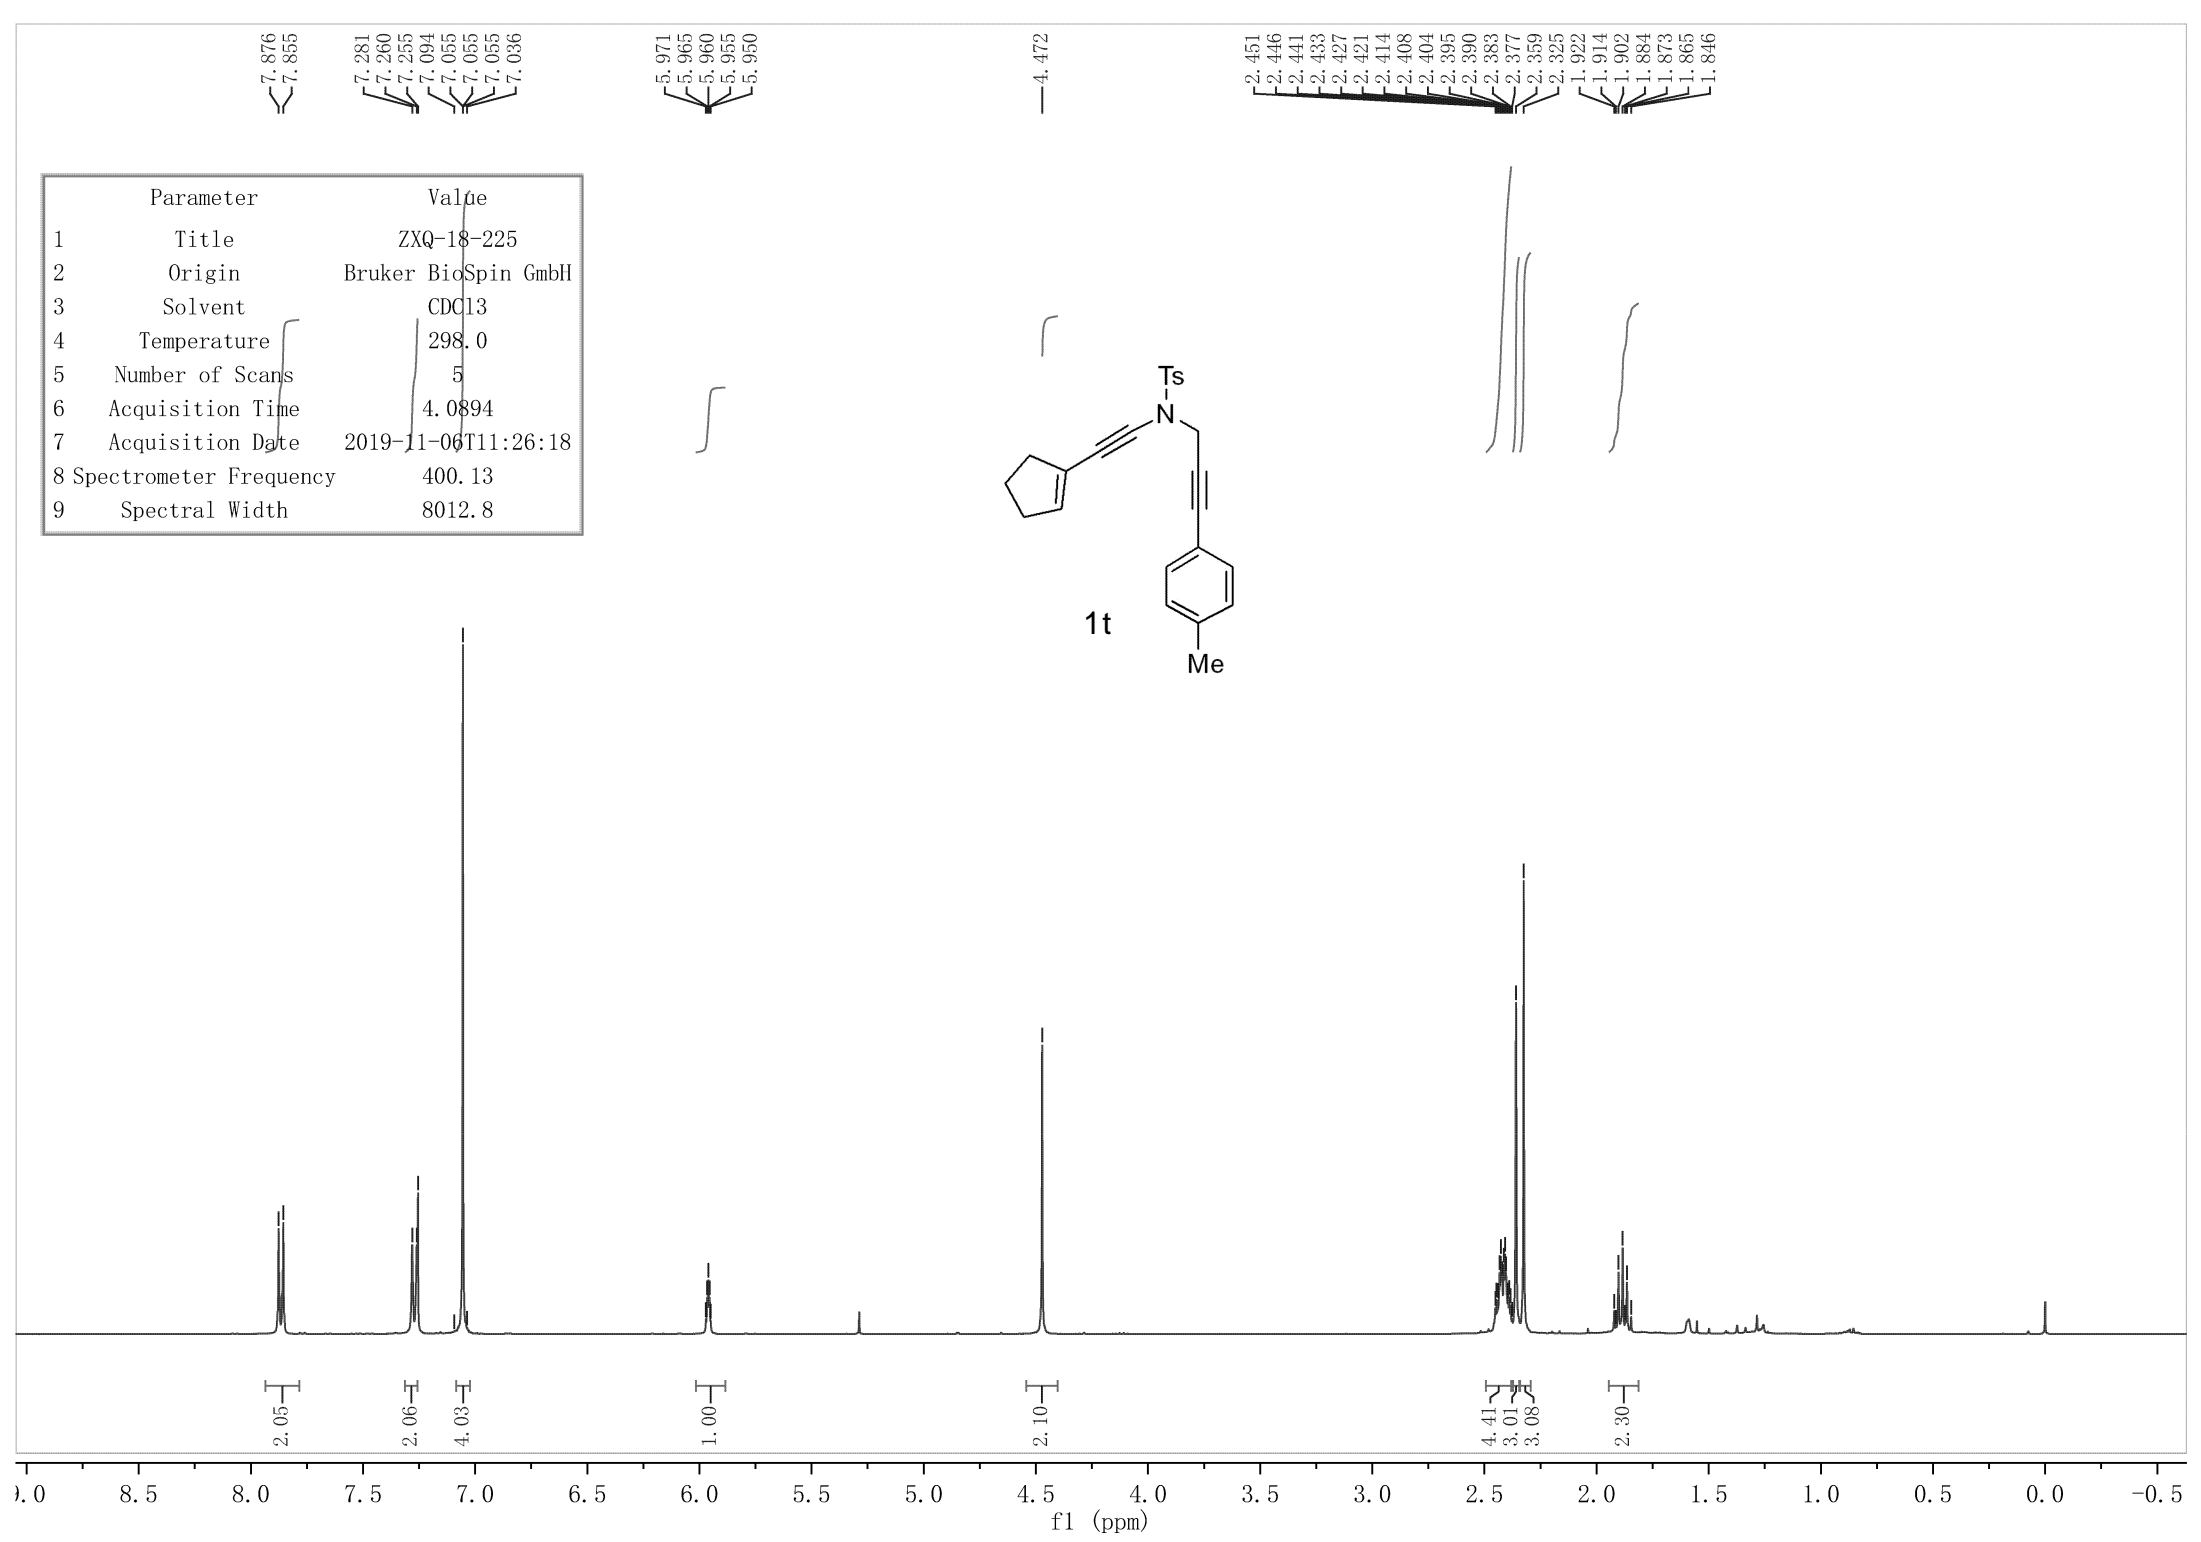

| Parameter                | Value               |
|--------------------------|---------------------|
| 1 Title                  | ZXQ-18-225-C-1      |
| 2 Origin                 | Bruker BioSpin GmbH |
| 3 Solvent                | CDC13               |
| 4 Temperature            | 300.0               |
| 5 Number of Scans        | 38                  |
| 6 Acquisition Time       | 1.3631              |
| 7 Acquisition Date       | 2019-11-06T11:28:28 |
| 8 Spectrometer Frequency | 100.61              |
| 9 Spectral Width         | 24038.5             |

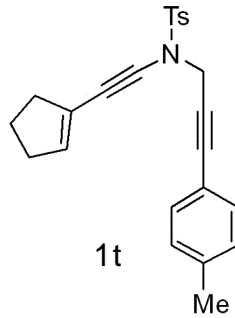

144.63  
138.65  
136.81  
134.32  
131.51  
129.45  
128.83  
128.20  
123.58  
119.03

86.48  
82.93  
80.52  
77.32  
77.00  
76.68  
68.56

42.91  
36.49  
33.19

23.19  
21.53  
21.41

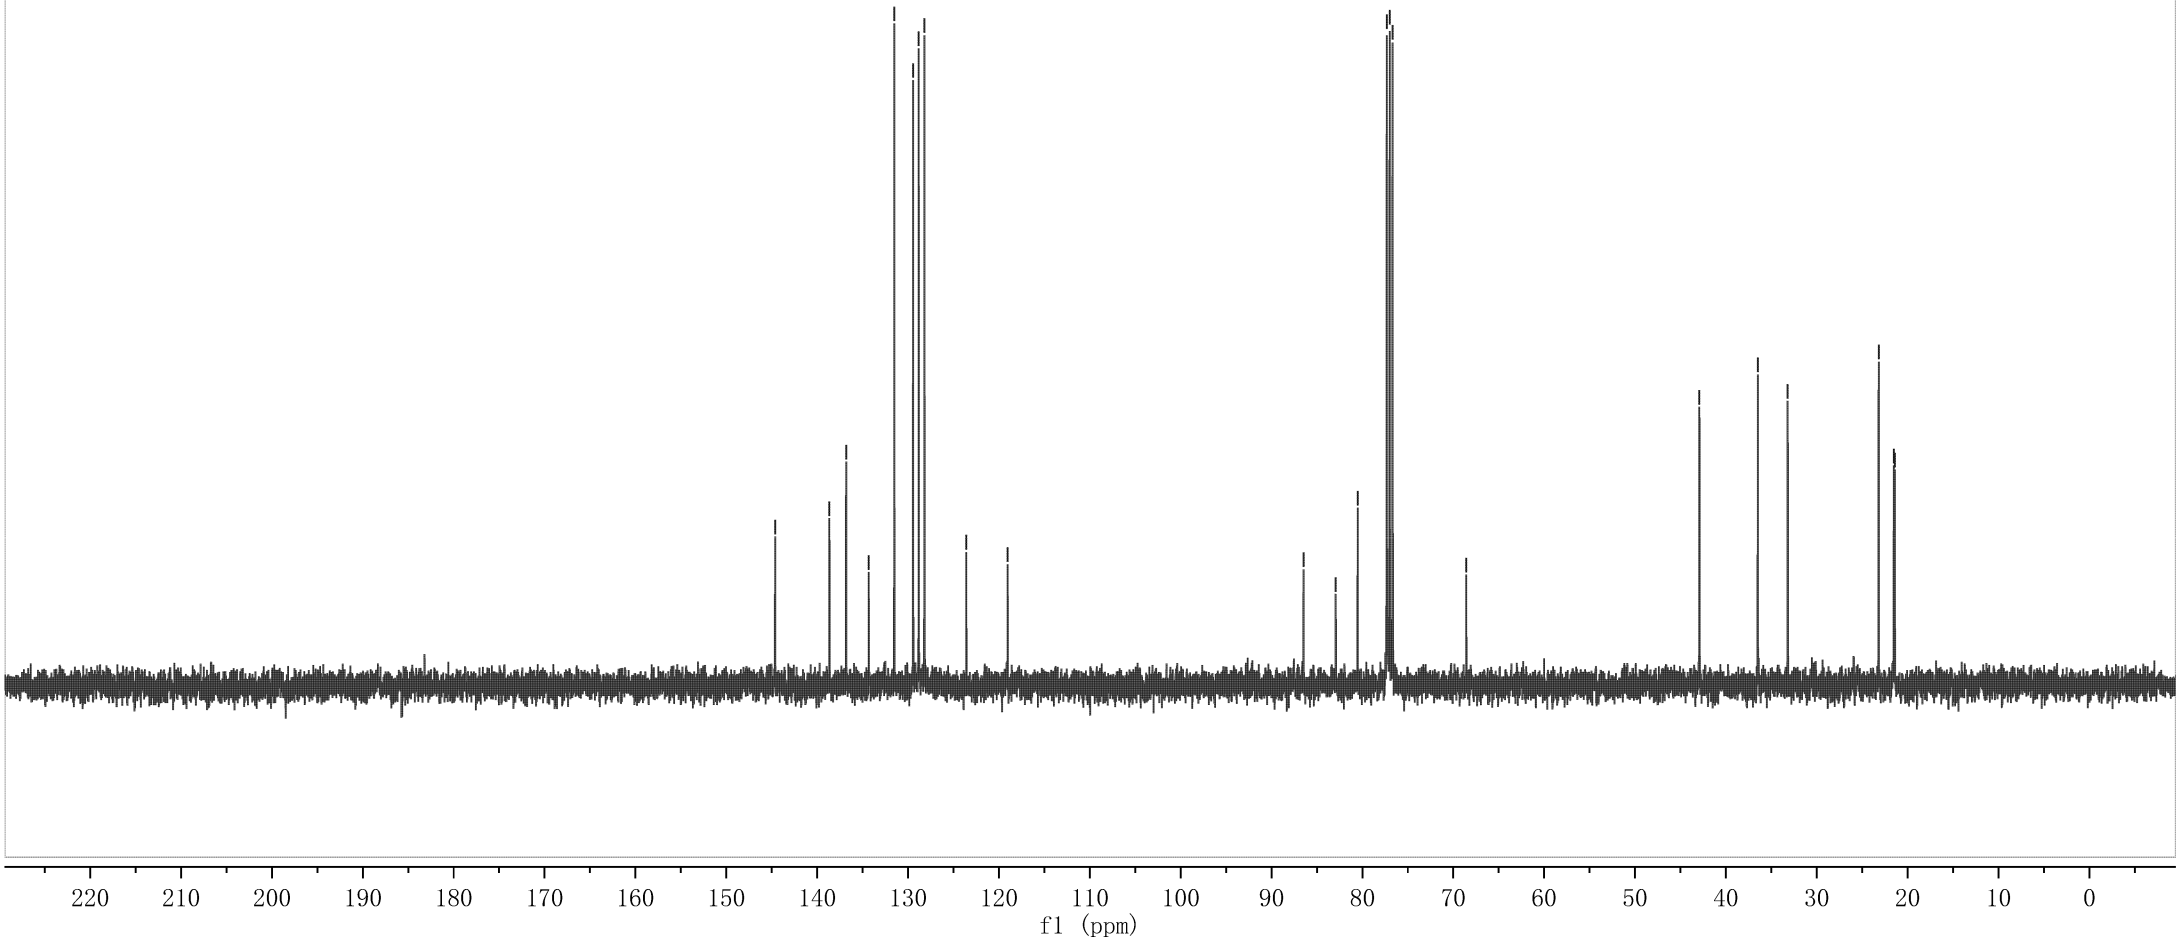

| Parameter                | Value               |
|--------------------------|---------------------|
| 1 Title                  | ZXQ-20-4.1u         |
| 2 Origin                 | Bruker BioSpin GmbH |
| 3 Solvent                | CDC13               |
| 4 Temperature            | 298.0               |
| 5 Number of Scans        | 7                   |
| 6 Acquisition Time       | 4.0894              |
| 7 Acquisition Date       | 2020-04-06T11:55:33 |
| 8 Spectrometer Frequency | 400.13              |
| 9 Spectral Width         | 8012.8              |

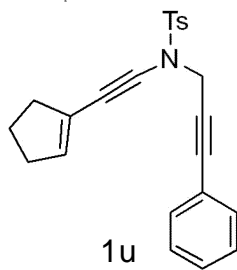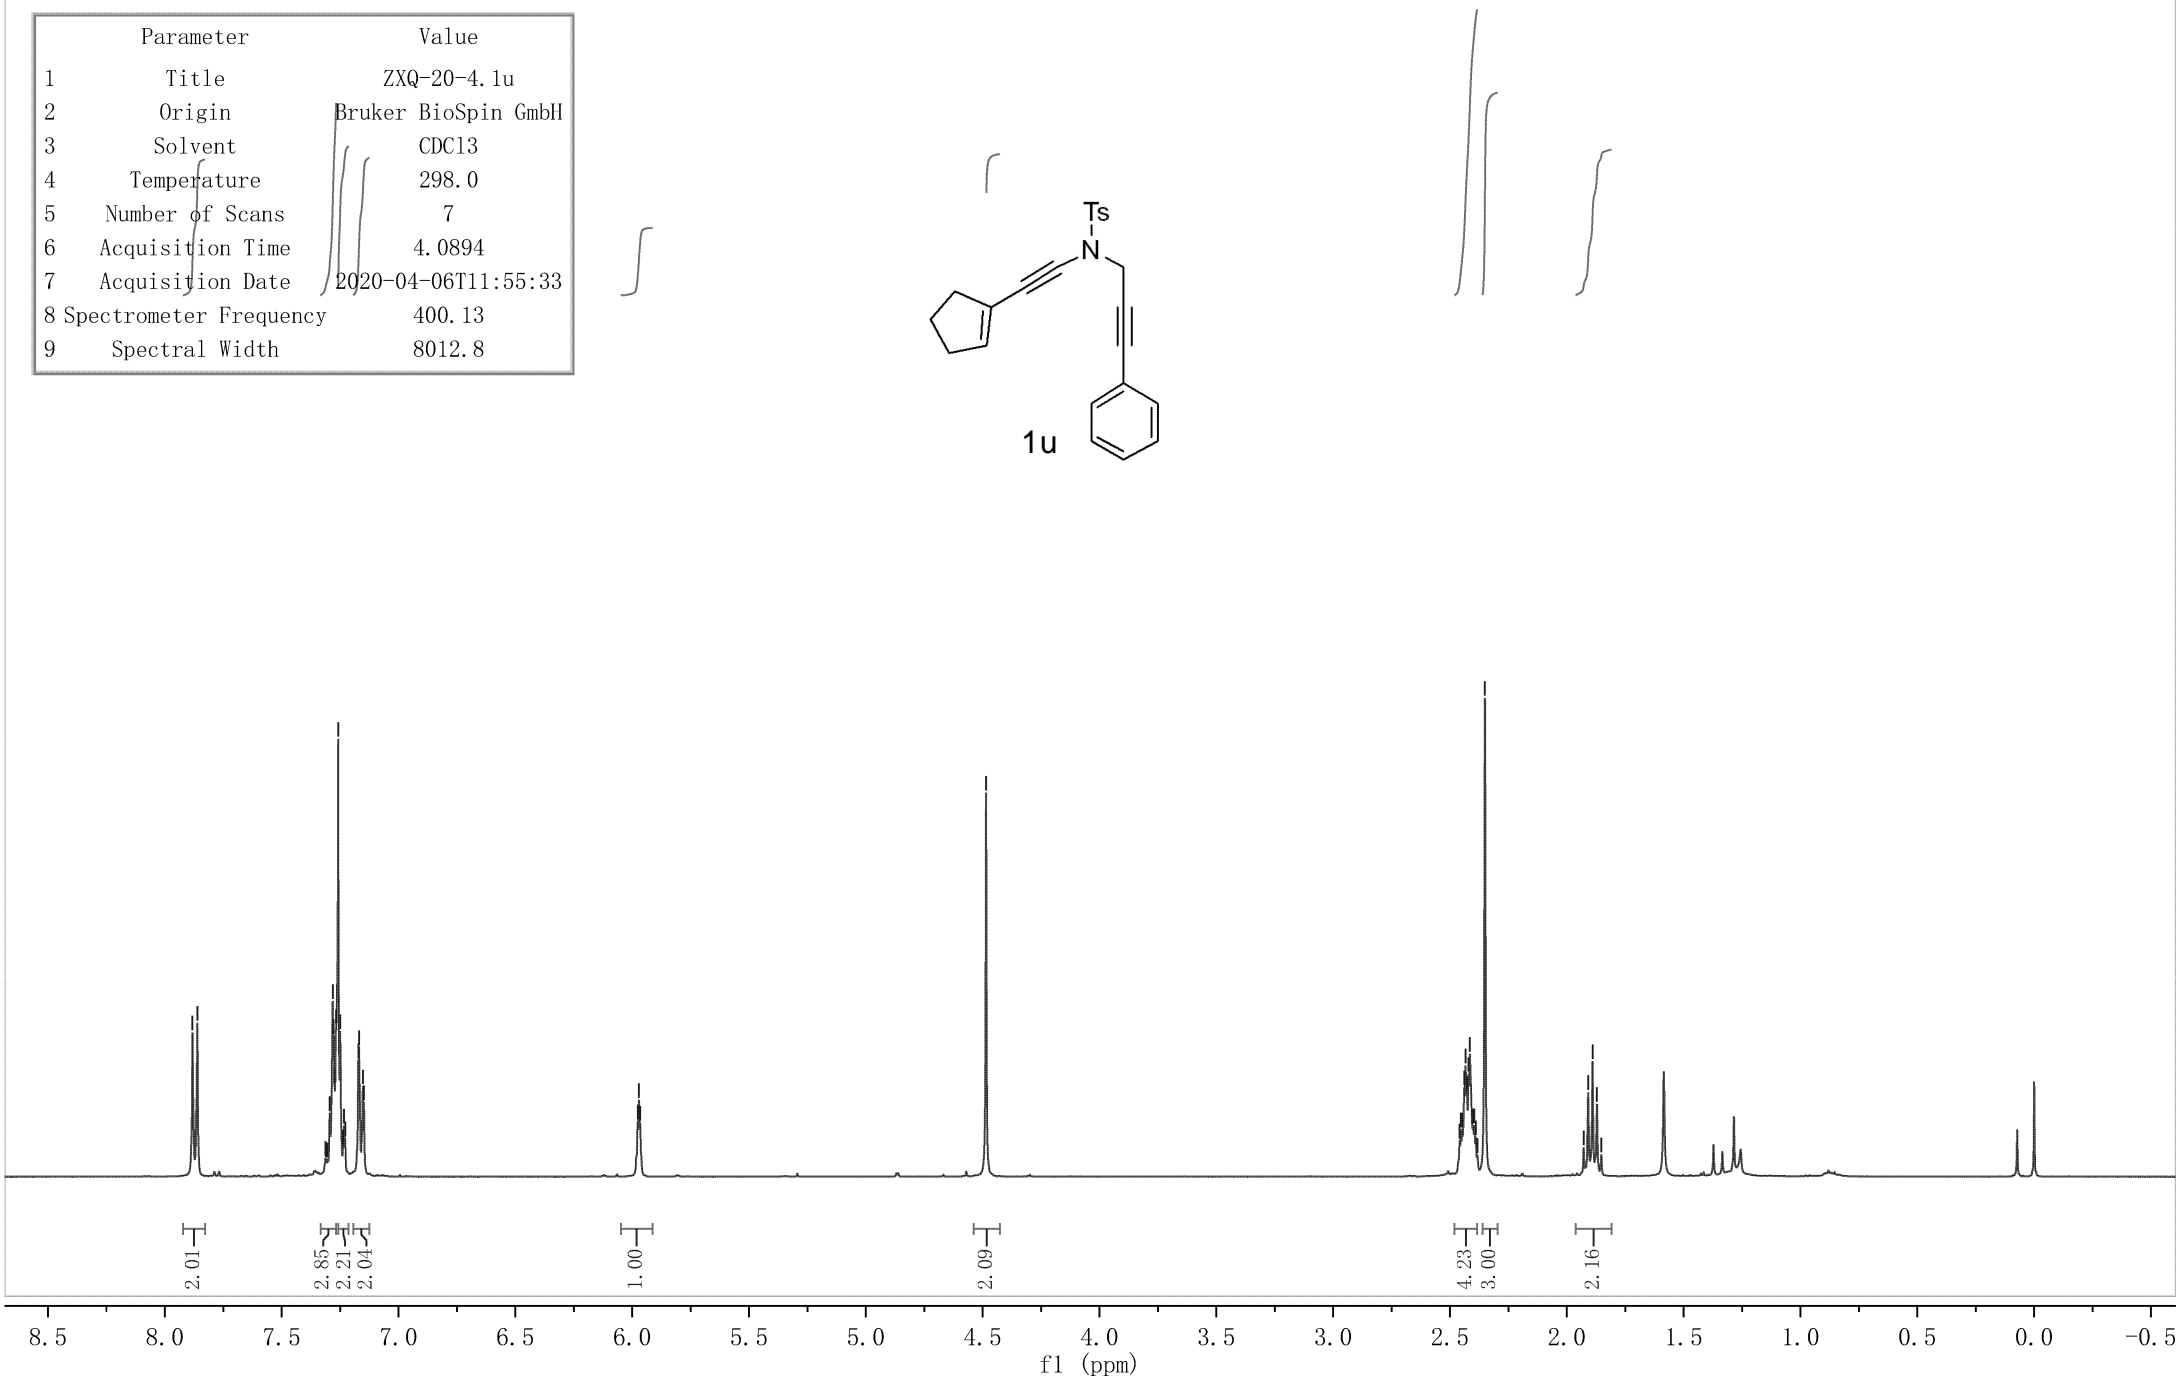



| Parameter                | Value               |
|--------------------------|---------------------|
| 1 Title                  | ZXQ-20-4. 1u-C      |
| 2 Origin                 | Bruker BioSpin GmbH |
| 3 Solvent                | CDC13               |
| 4 Temperature            | 300.0               |
| 5 Number of Scans        | 112                 |
| 6 Acquisition Time       | 1.3631              |
| 7 Acquisition Date       | 2020-04-06T14:20:02 |
| 8 Spectrometer Frequency | 100.61              |
| 9 Spectral Width         | 24038.5             |

144.70  
136.92  
134.32  
131.62  
129.47  
128.51  
128.22  
128.09  
123.58  
122.13

86.33  
82.89  
81.26  
77.32  
77.00  
76.68

68.60

42.87  
36.51  
33.21

23.20  
21.53

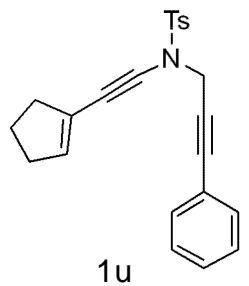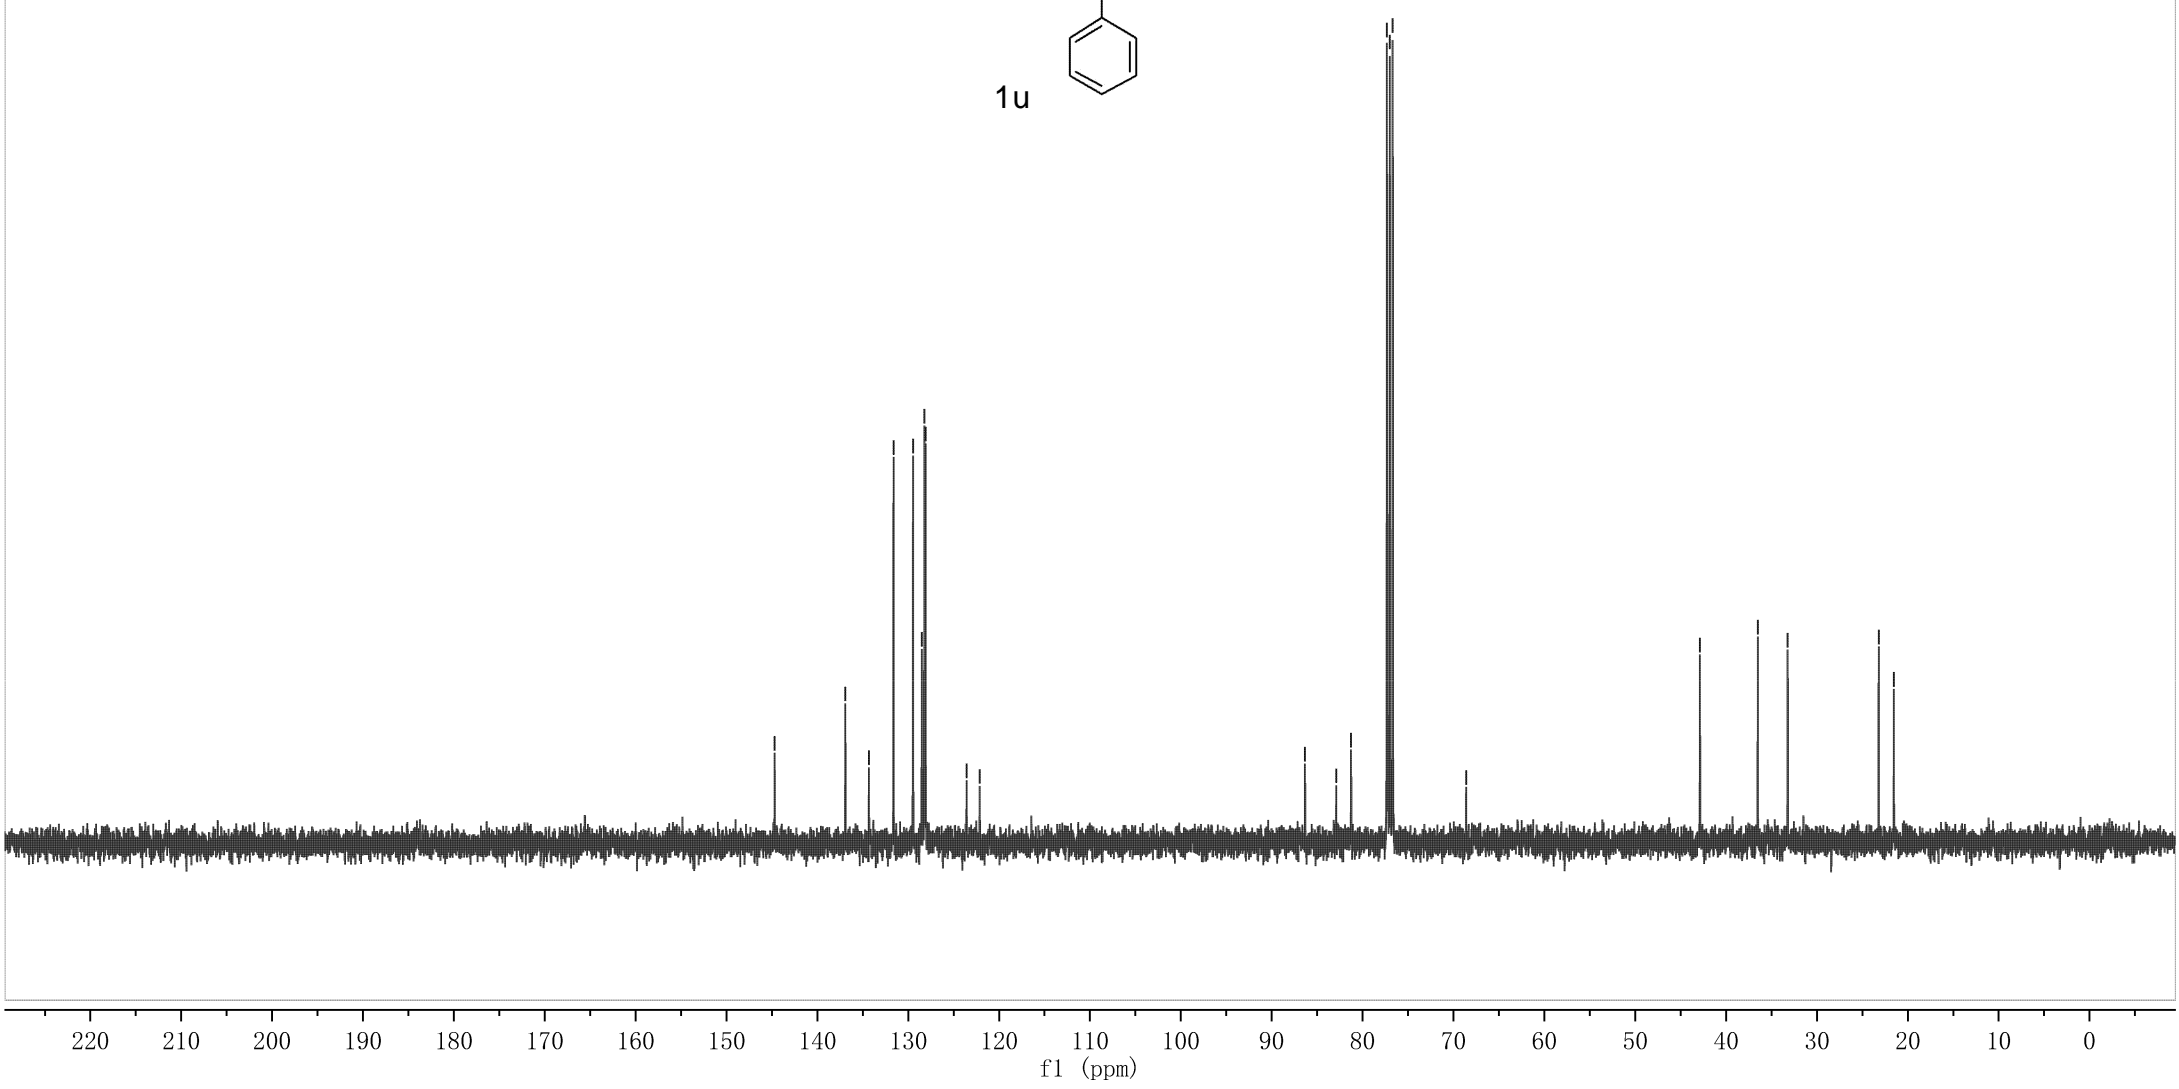

7.878  
7.857  
7.431  
7.431  
7.426  
7.420  
7.415  
7.409  
7.404  
7.309  
7.289  
7.221  
7.221  
7.144  
7.125  
7.115  
7.108  
5.994  
5.994  
5.982  
5.977

4.479

2.463  
2.457  
2.452  
2.444  
2.438  
2.433  
2.425  
2.419  
2.406  
2.393  
1.933  
1.913  
1.895  
1.876  
1.857

| Parameter                | Value               |
|--------------------------|---------------------|
| 1 Title                  | ZXQ-19-10           |
| 2 Origin                 | Bruker BioSpin GmbH |
| 3 Solvent                | CDC13               |
| 4 Temperature            | 298.0               |
| 5 Number of Scans        | 5                   |
| 6 Acquisition Time       | 4.0894              |
| 7 Acquisition Date       | 2019-11-12T11:31:46 |
| 8 Spectrometer Frequency | 400.13              |
| 9 Spectral Width         | 8012.8              |

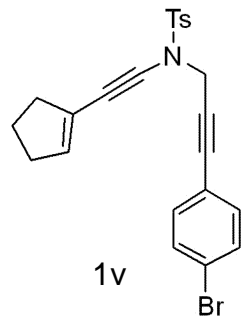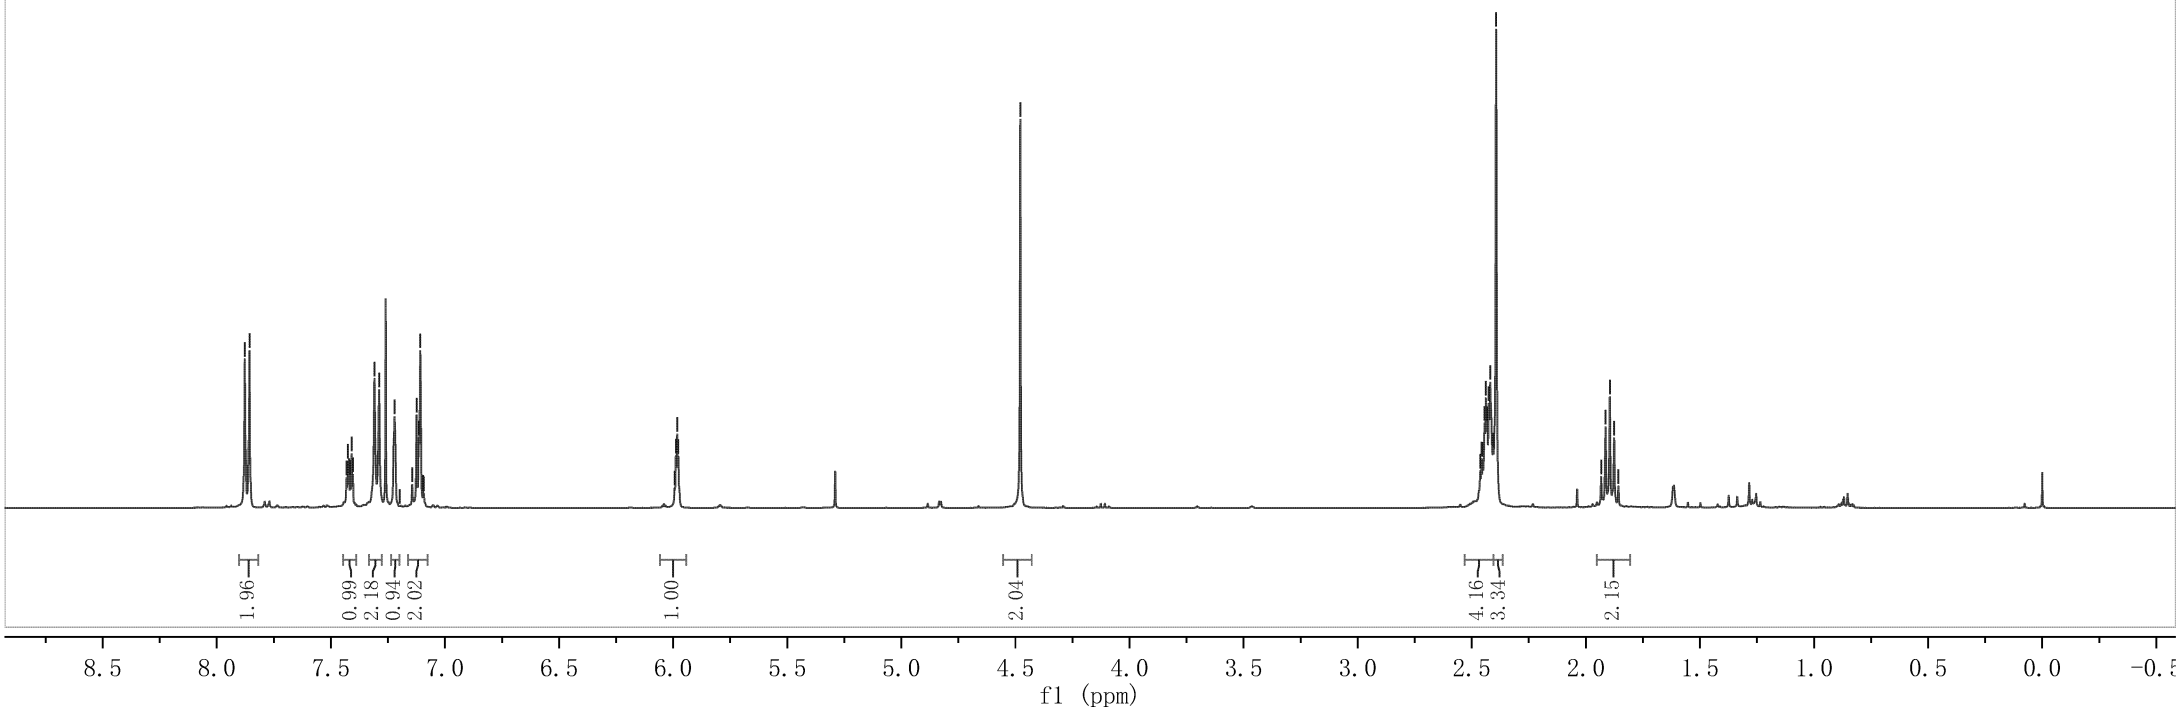

| Parameter                | Value               |
|--------------------------|---------------------|
| 1 Title                  | ZXQ-19-10-C         |
| 2 Origin                 | Bruker BioSpin GmbH |
| 3 Solvent                | CDC13               |
| 4 Temperature            | 300.0               |
| 5 Number of Scans        | 25                  |
| 6 Acquisition Time       | 1.3631              |
| 7 Acquisition Date       | 2019-11-12T11:33:12 |
| 8 Spectrometer Frequency | 100.61              |
| 9 Spectral Width         | 24038.5             |

144.88  
 137.15  
 134.38  
 131.65  
 130.03  
 129.48  
 128.21  
 124.00  
 123.43  
 121.82  
 84.74  
 82.75  
 82.71  
 77.32  
 77.00  
 76.68  
 68.62  
 42.70  
 36.48  
 33.20  
 23.16  
 21.61

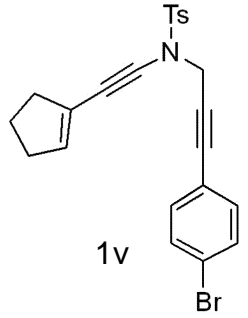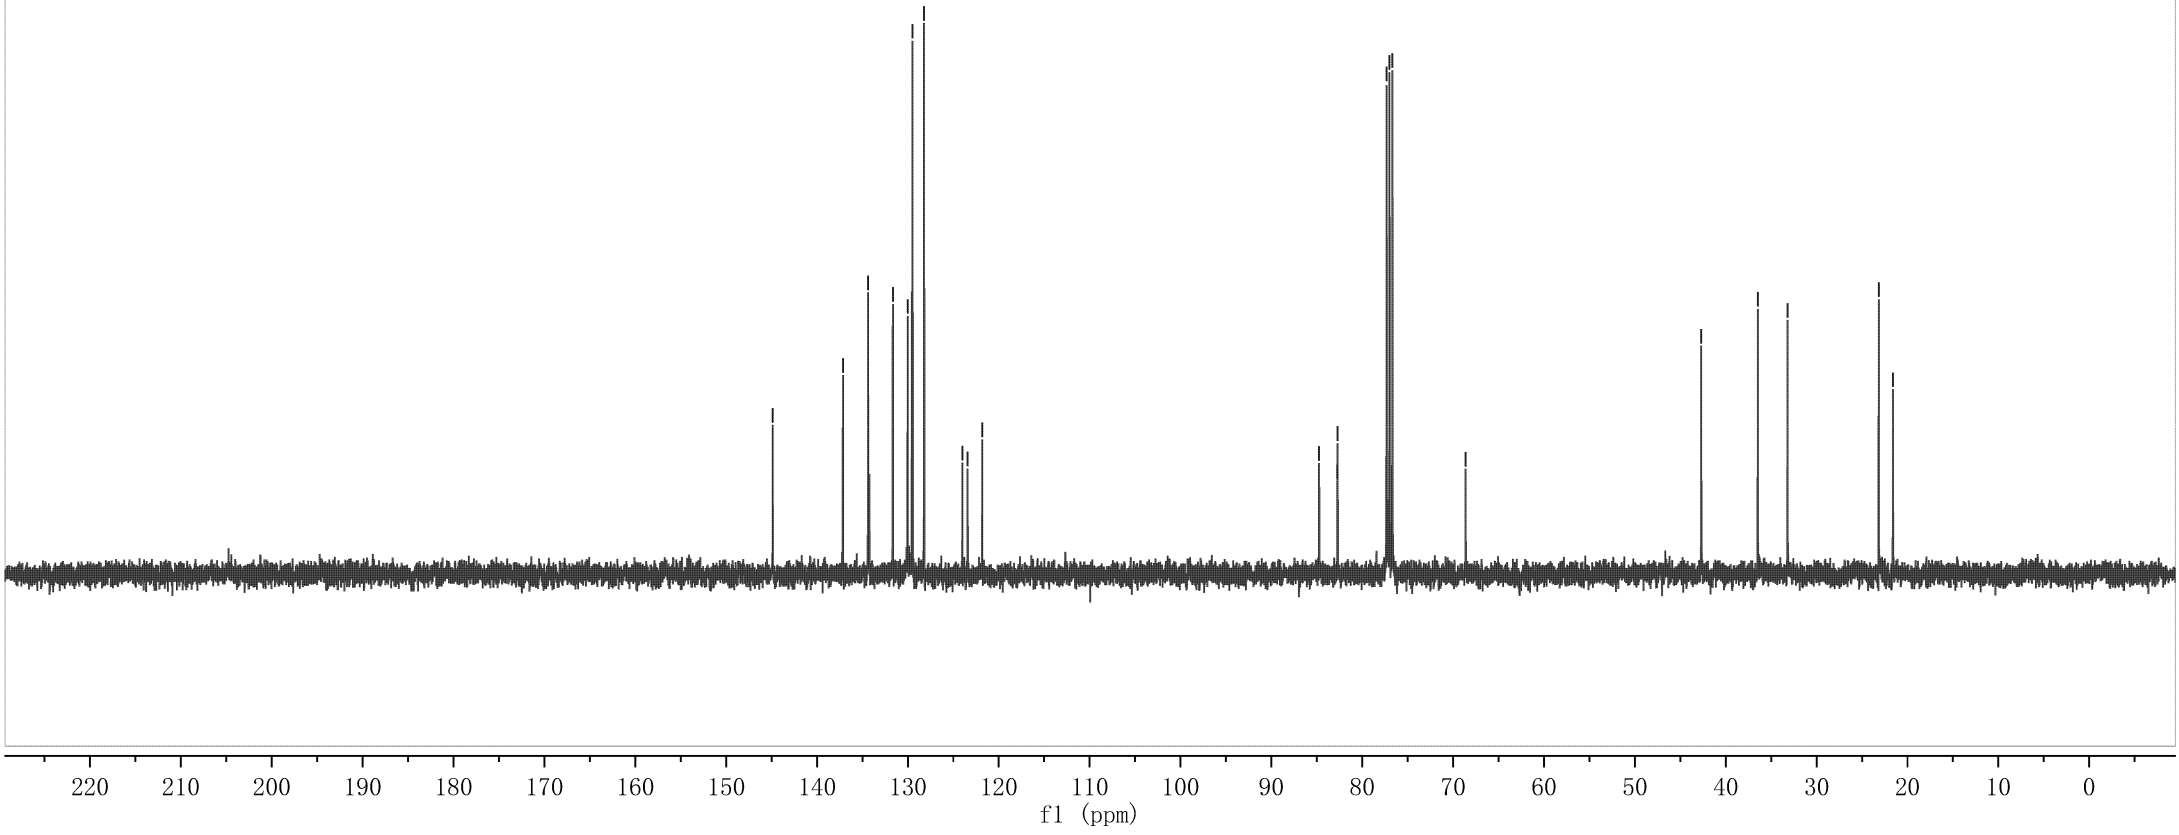

| Parameter                | Value               |
|--------------------------|---------------------|
| 1 Title                  | ZXQ-18-214          |
| 2 Origin                 | Bruker BioSpin GmbH |
| 3 Solvent                | CDC13               |
| 4 Temperature            | 298.0               |
| 5 Number of Scans        | 4                   |
| 6 Acquisition Time       | 4.0894              |
| 7 Acquisition Date       | 2019-11-04T16:11:12 |
| 8 Spectrometer Frequency | 400.13              |
| 9 Spectral Width         | 8012.8              |

7.869  
7.848  
7.305  
7.285  
7.227  
7.216  
7.214  
7.014  
7.009  
6.928  
6.919  
6.919  
6.915  
6.906

5.975  
5.970  
5.965

4.495

2.454  
2.449  
2.443  
2.435  
2.429  
2.416  
2.411  
2.391  
2.379  
1.923  
1.904  
1.885  
1.866  
1.848

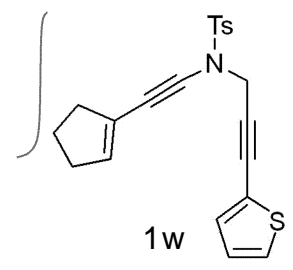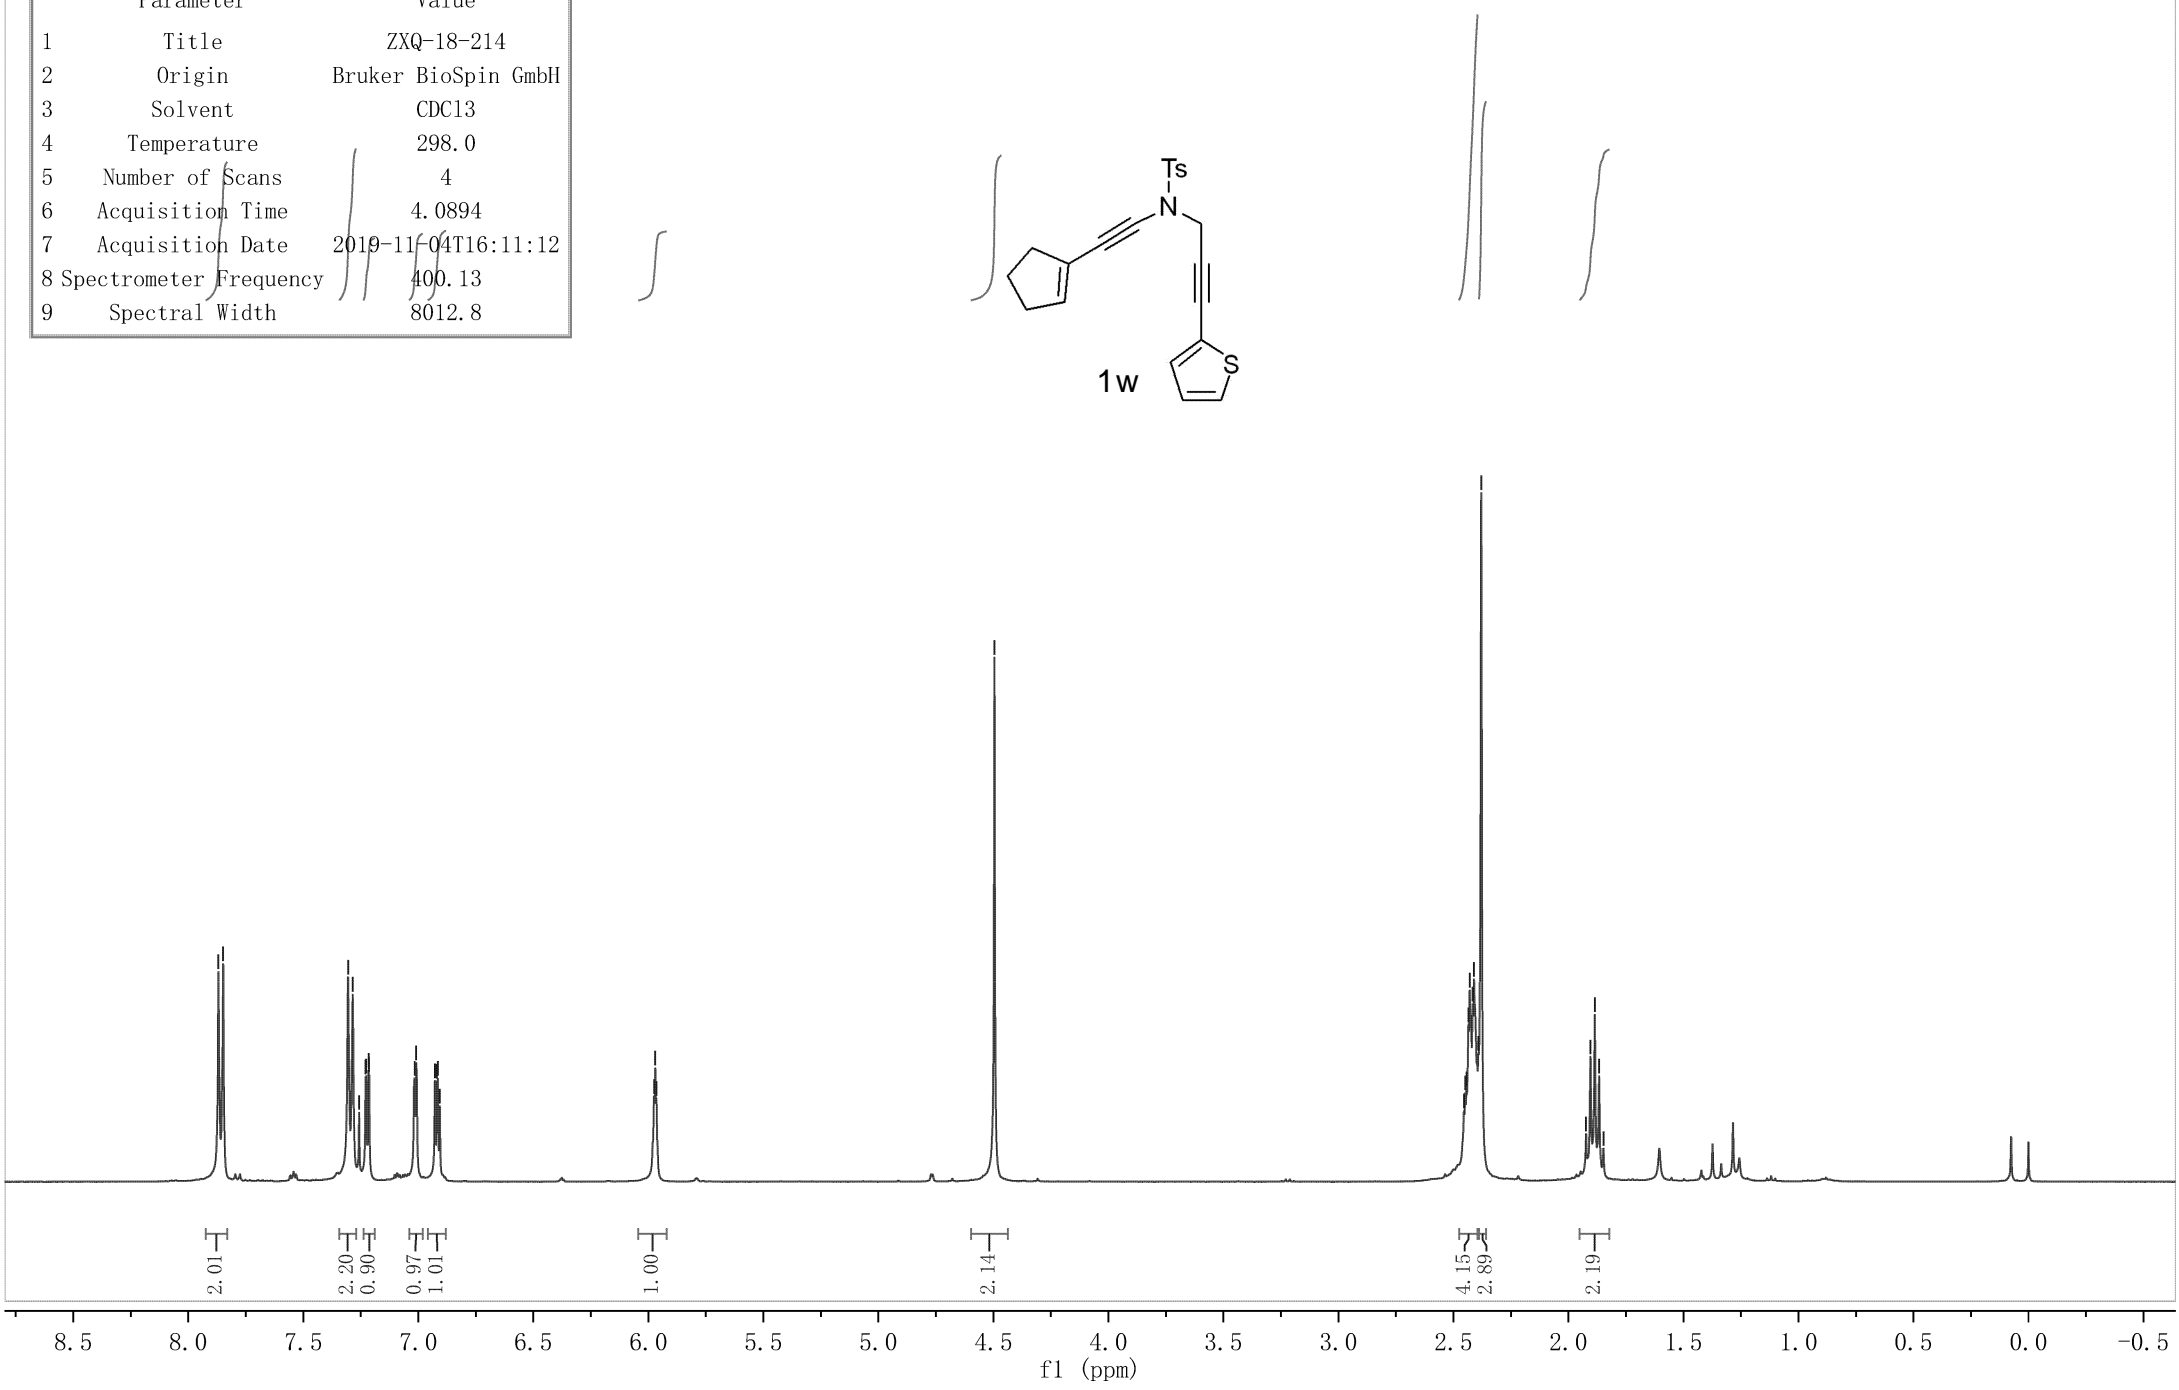

| Parameter                | Value               |
|--------------------------|---------------------|
| 1 Title                  | ZXQ-18-214-C-1      |
| 2 Origin                 | Bruker BioSpin GmbH |
| 3 Solvent                | CDC13               |
| 4 Temperature            | 300.0               |
| 5 Number of Scans        | 27                  |
| 6 Acquisition Time       | 1.3631              |
| 7 Acquisition Date       | 2019-11-04T16:13:37 |
| 8 Spectrometer Frequency | 100.61              |
| 9 Spectral Width         | 24038.5             |

144.79  
136.97  
134.12  
132.51  
129.52  
128.12  
127.48  
126.76  
123.49  
121.95

85.18  
82.79  
79.61  
77.32  
77.00  
76.68  
68.67

42.97  
36.46  
33.19  
23.17  
21.60

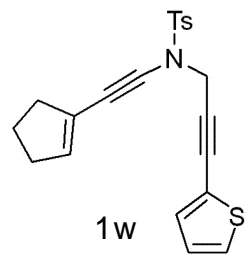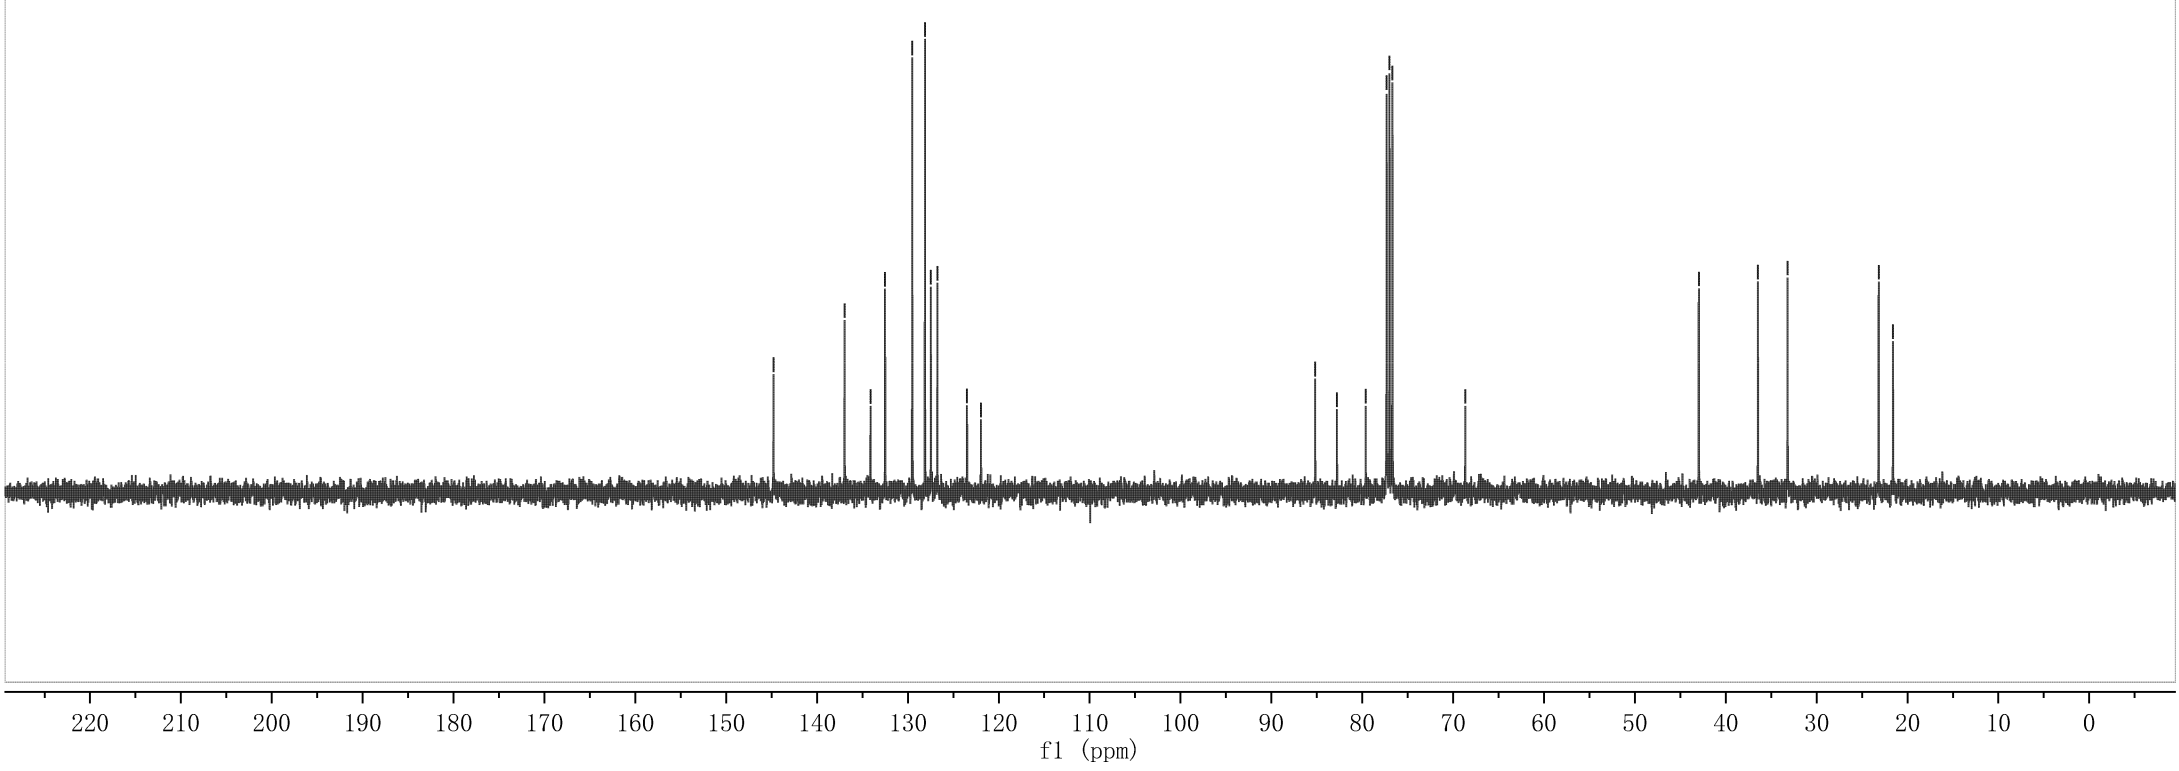

| Parameter                | Value               |
|--------------------------|---------------------|
| 1 Title                  | ZXQ-18-210          |
| 2 Origin                 | Bruker BioSpin GmbH |
| 3 Solvent                | CDC13               |
| 4 Temperature            | 298.0               |
| 5 Number of Scans        | 9                   |
| 6 Acquisition Time       | 4.0894              |
| 7 Acquisition Date       | 2019-11-02T17:37:29 |
| 8 Spectrometer Frequency | 400.13              |
| 9 Spectral Width         | 8012.8              |

7.871  
7.867  
7.855  
7.850

7.290  
7.270  
7.258  
7.213  
7.201  
7.201  
6.873  
6.873  
6.864  
6.861  
6.861

5.970  
5.964  
5.959  
5.954  
5.949

4.458

2.449  
2.444  
2.439  
2.433  
2.424  
2.421  
2.414  
2.411  
2.408  
2.406  
2.403  
2.395  
2.390  
2.383  
2.373  
1.922  
1.902  
1.902  
1.892  
1.884  
1.865  
1.846

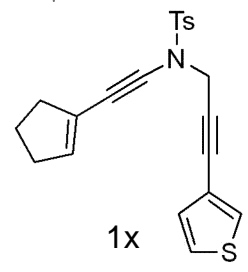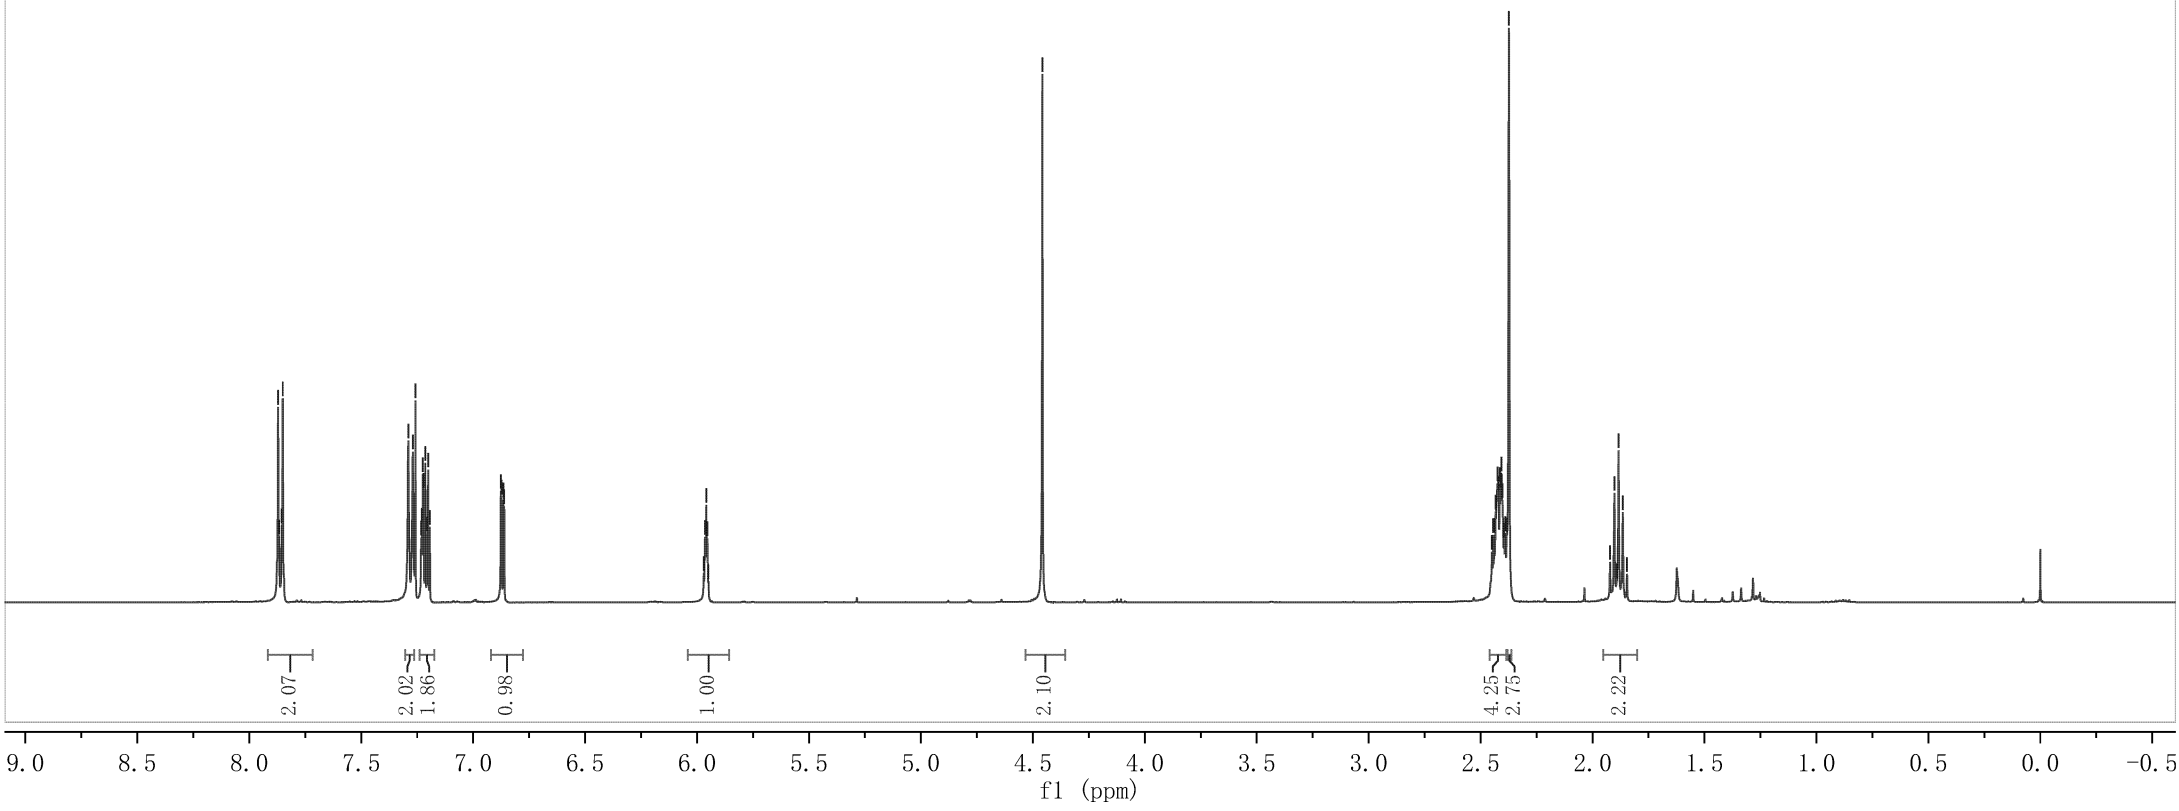

| Parameter                | Value               |
|--------------------------|---------------------|
| 1 Title                  | ZXQ-18-210-C-1      |
| 2 Origin                 | Bruker BioSpin GmbH |
| 3 Solvent                | CDC13               |
| 4 Temperature            | 300.0               |
| 5 Number of Scans        | 21                  |
| 6 Acquisition Time       | 1.3631              |
| 7 Acquisition Date       | 2019-11-02T17:41:29 |
| 8 Spectrometer Frequency | 100.61              |
| 9 Spectral Width         | 24038.5             |

144.67  
136.84  
134.25  
129.64  
129.41  
129.19  
128.16  
125.12  
123.51  
121.14

82.87  
81.48  
80.87  
77.32  
77.00  
76.68  
68.58

42.85  
36.46  
33.17  
23.16  
21.53

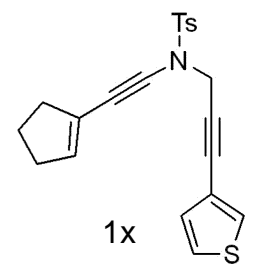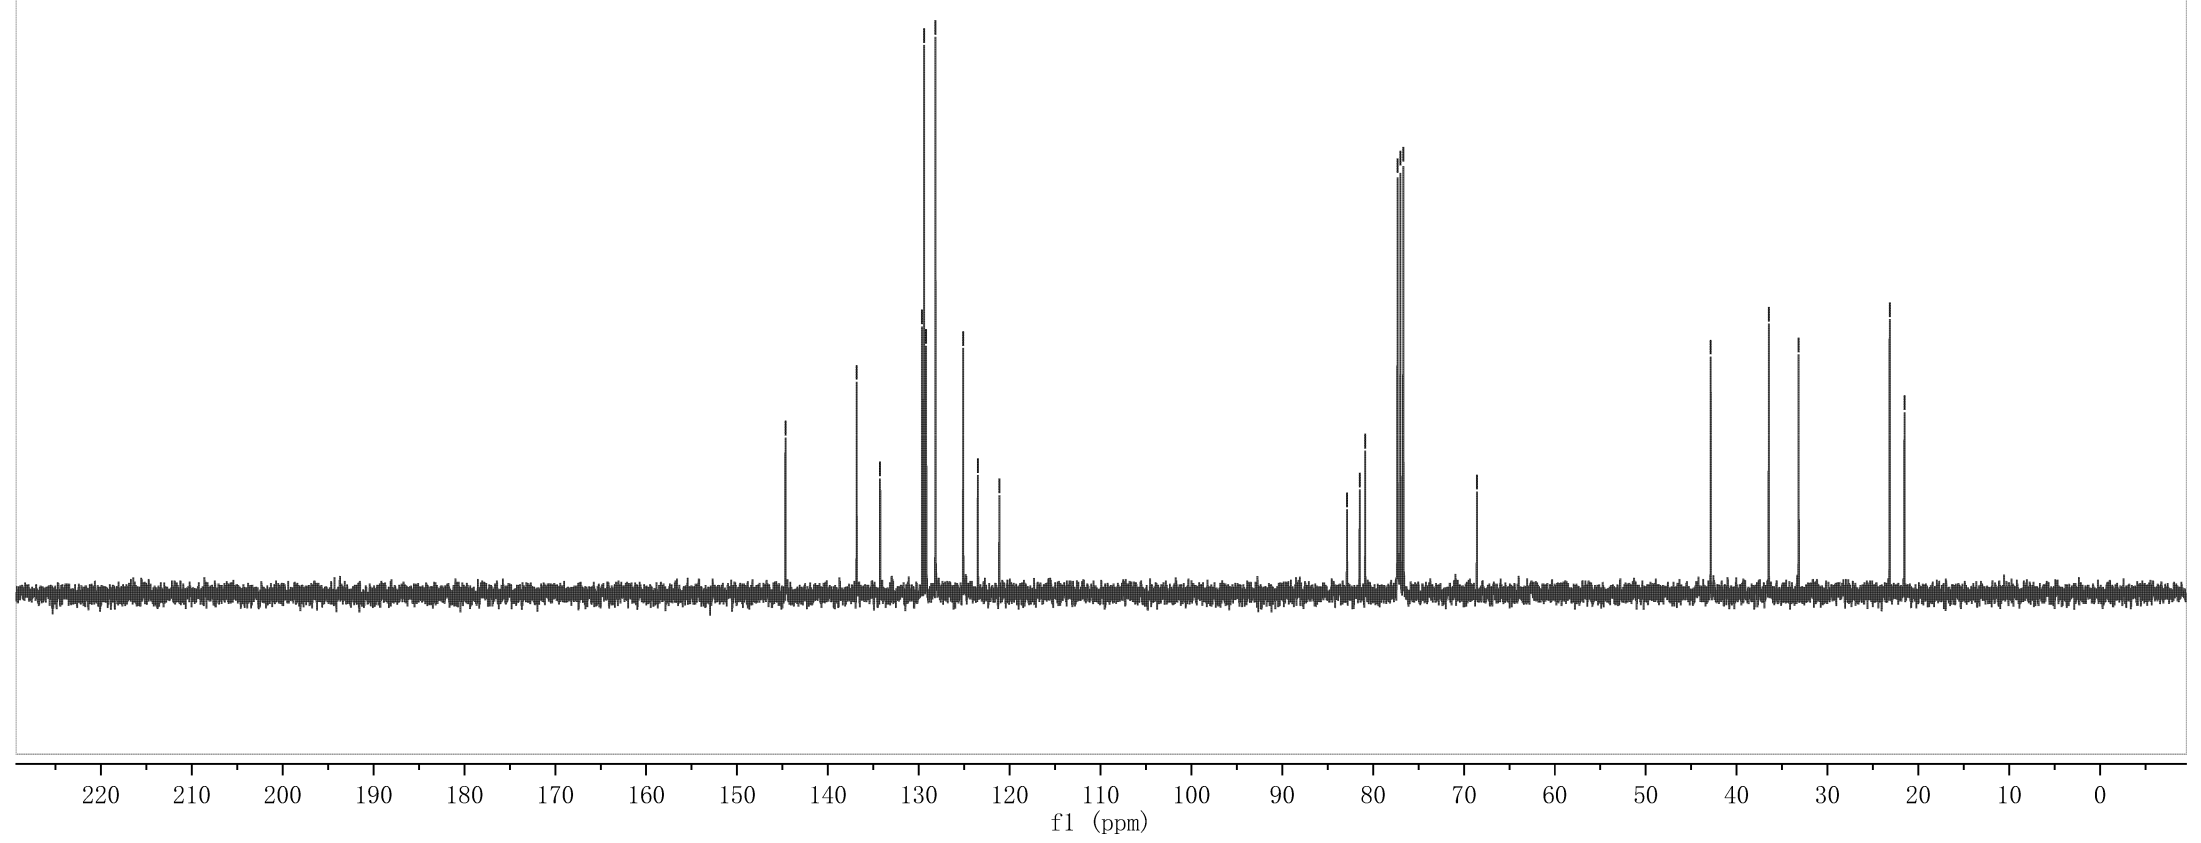

| Parameter                | Value               |
|--------------------------|---------------------|
| 1 Title                  | ZXQ-19-38           |
| 2 Origin                 | Bruker BioSpin GmbH |
| 3 Solvent                | CDC13               |
| 4 Temperature            | 298.0               |
| 5 Number of Scans        | 4                   |
| 6 Acquisition Time       | 4.0894              |
| 7 Acquisition Date       | 2019-11-19T21:29:36 |
| 8 Spectrometer Frequency | 400.13              |
| 9 Spectral Width         | 8012.8              |

7.862  
7.842

7.401  
7.379  
7.372  
7.352  
7.352

6.846  
6.825

6.037  
5.980  
5.980  
5.980

4.408

3.808

2.520  
2.459  
2.421

2.340  
1.928  
1.909  
1.890  
1.871  
1.853

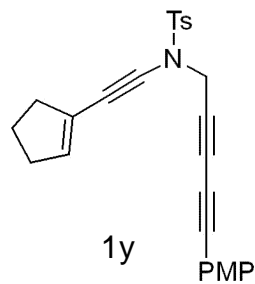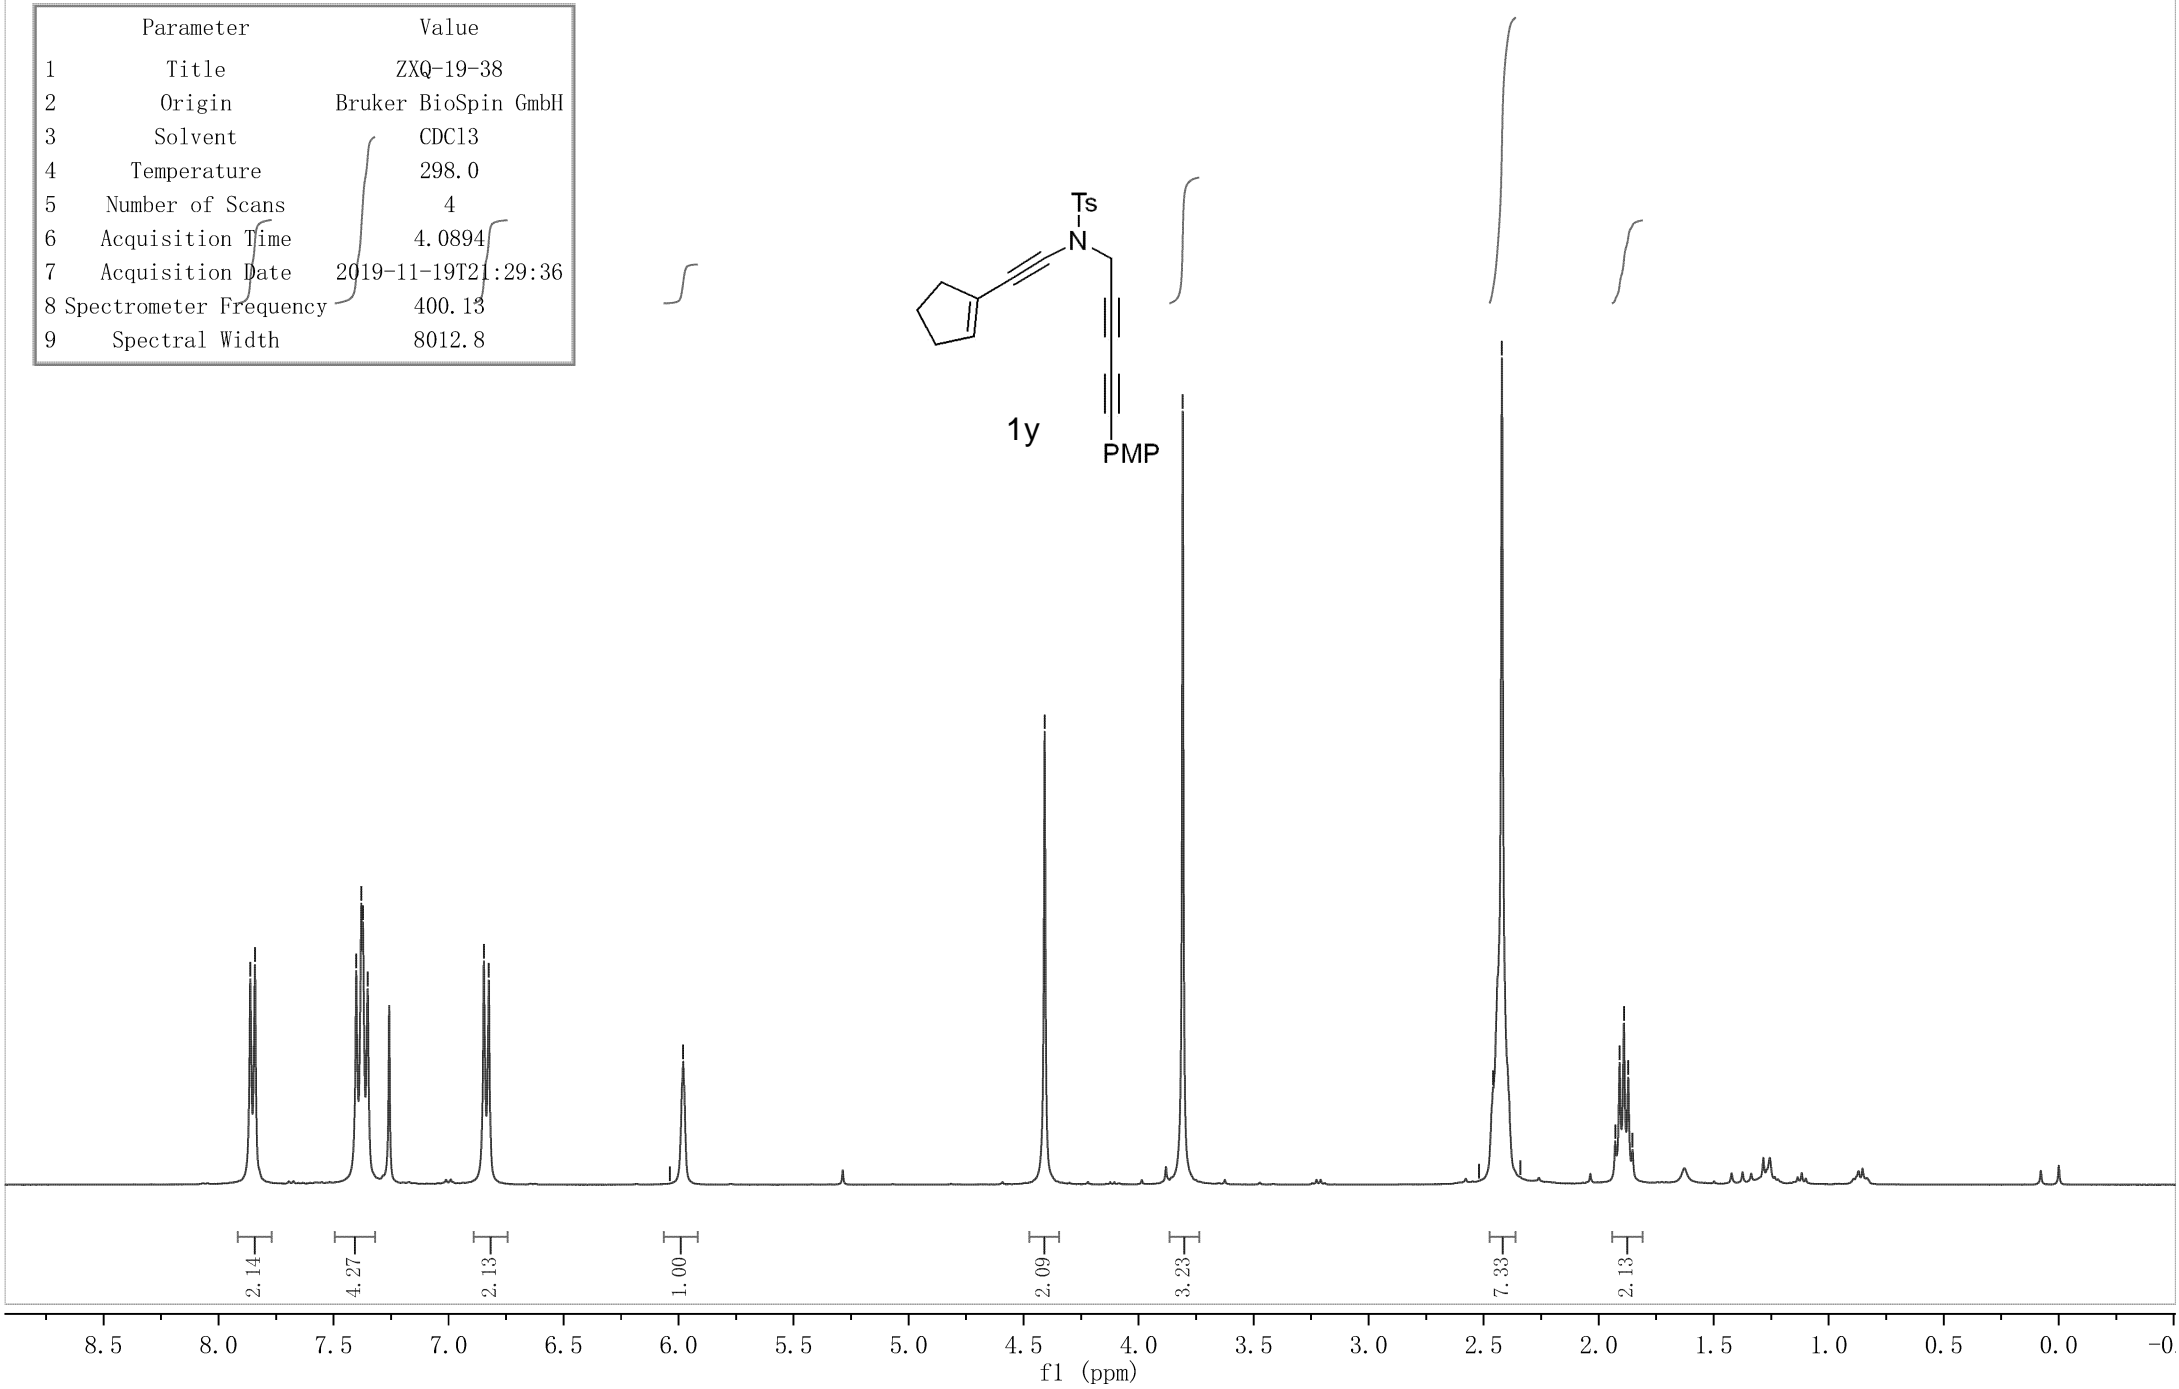



| Parameter                | Value               |
|--------------------------|---------------------|
| 1 Title                  | ZXQ-19-38-C         |
| 2 Origin                 | Bruker BioSpin GmbH |
| 3 Solvent                | CDC13               |
| 4 Temperature            | 300.0               |
| 5 Number of Scans        | 30                  |
| 6 Acquisition Time       | 1.3631              |
| 7 Acquisition Date       | 2019-11-19T21:31:00 |
| 8 Spectrometer Frequency | 100.61              |
| 9 Spectral Width         | 24038.5             |

160.51 —  
 144.96 —  
 137.00 —  
 134.16 —  
 133.89 —  
 129.55 —  
 128.16 —  
 123.37 —  
 114.13 —  
 112.95 —  
 82.60 —  
 78.42 —  
 77.32 —  
 77.00 —  
 76.68 —  
 74.00 —  
 71.95 —  
 71.23 —  
 68.82 —  
 55.29 —  
 42.96 —  
 36.42 —  
 33.20 —  
 23.17 —  
 21.66 —

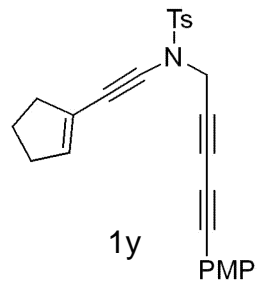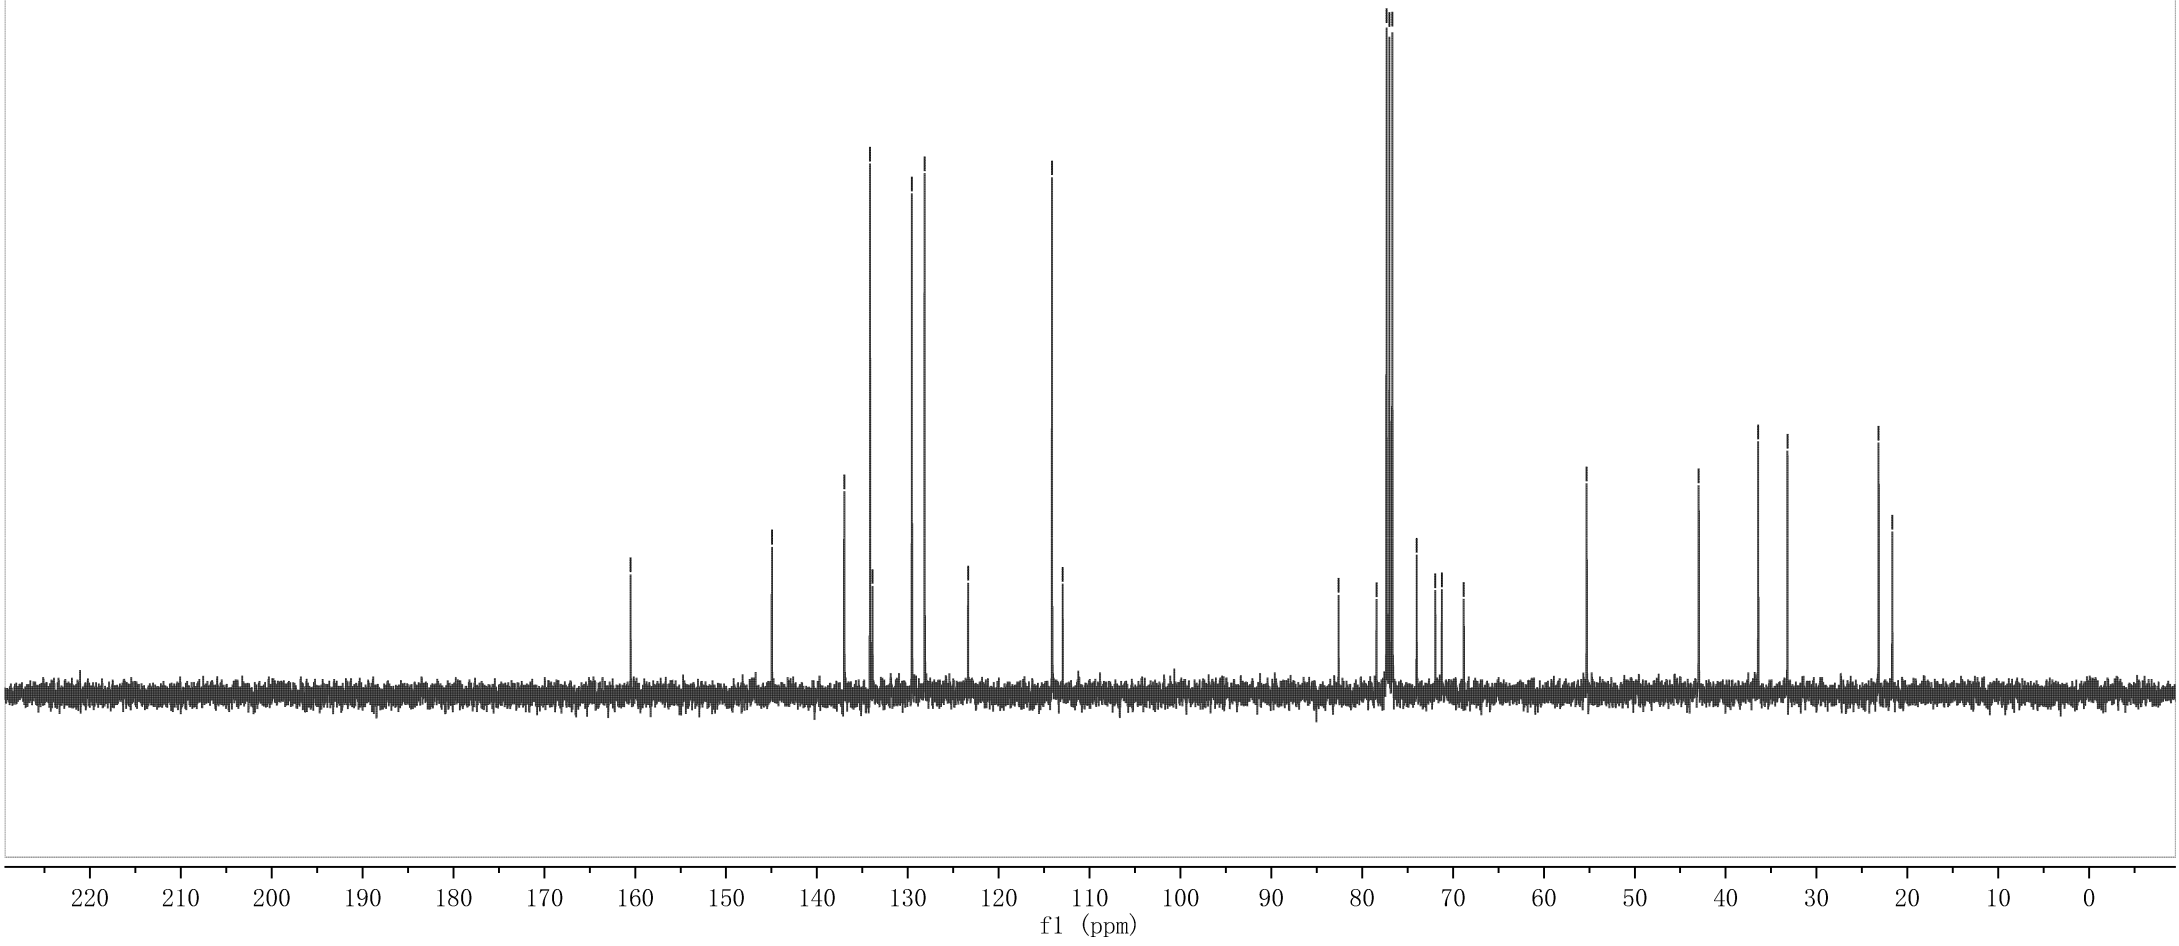

7.871 7.850 7.287 7.267 7.251 7.076 7.070 7.065 7.052 6.834 6.834 6.562 6.556 6.551 6.538 6.533 6.527 5.189 5.186 5.184 5.182 5.137 5.134 5.129 5.125 4.468 2.949 2.373 1.877 1.874 1.871

| Parameter                | Value               |
|--------------------------|---------------------|
| 1 Title                  | ZXQ-20-40           |
| 2 Origin                 | Bruker BioSpin GmbH |
| 3 Solvent                | CDC13               |
| 4 Temperature            | 298.1               |
| 5 Number of Scans        | 7                   |
| 6 Acquisition Time       | 3.9846              |
| 7 Acquisition Date       | 2020-04-14T21:37:02 |
| 8 Spectrometer Frequency | 400.03              |
| 9 Spectral Width         | 8223.7              |

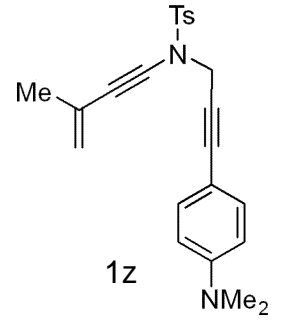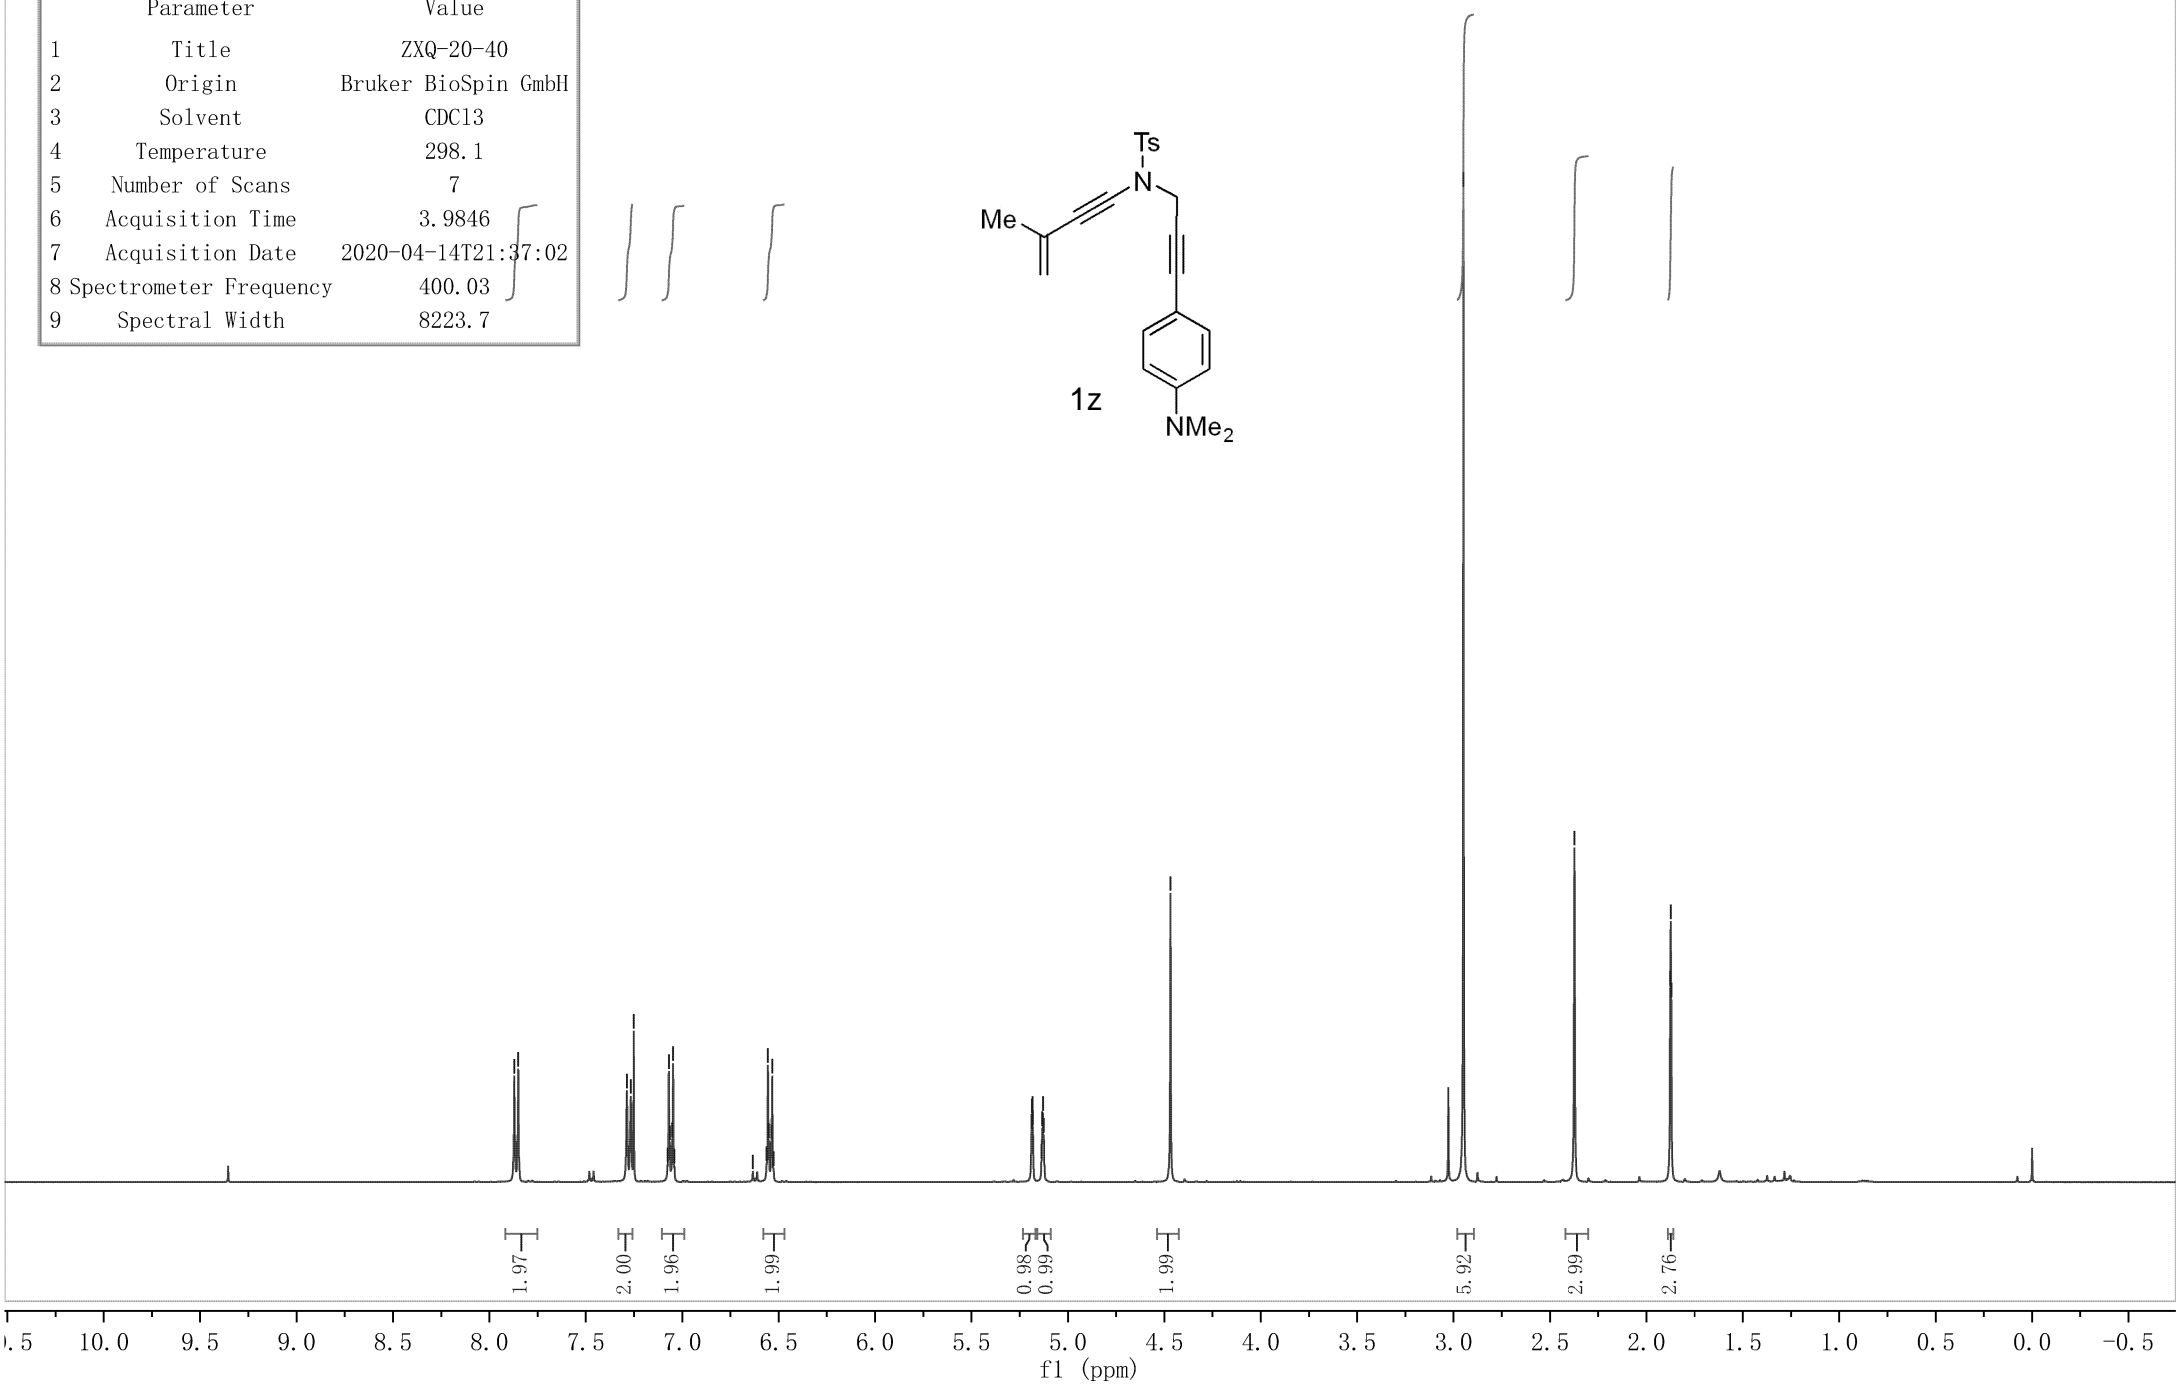

10.5 10.0 9.5 9.0 8.5 8.0 7.5 7.0 6.5 6.0 5.5 5.0 4.5 4.0 3.5 3.0 2.5 2.0 1.5 1.0 0.5 0.0 -0.5

f1 (ppm)

| Parameter                | Value               |
|--------------------------|---------------------|
| 1 Title                  | ZXQ-20-40           |
| 2 Origin                 | Bruker BioSpin GmbH |
| 3 Solvent                | CDC13               |
| 4 Temperature            | 298.1               |
| 5 Number of Scans        | 7                   |
| 6 Acquisition Time       | 3.9846              |
| 7 Acquisition Date       | 2020-04-14T21:37:02 |
| 8 Spectrometer Frequency | 400.03              |
| 9 Spectral Width         | 8223.7              |

150.18 144.64 134.25 132.74 129.44 128.14 126.04 119.89 111.45 108.71 87.55 81.54 78.68 77.32 77.00 76.68 72.61 43.11 40.08 23.47 21.57

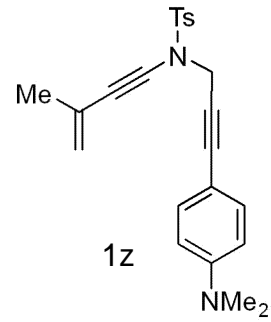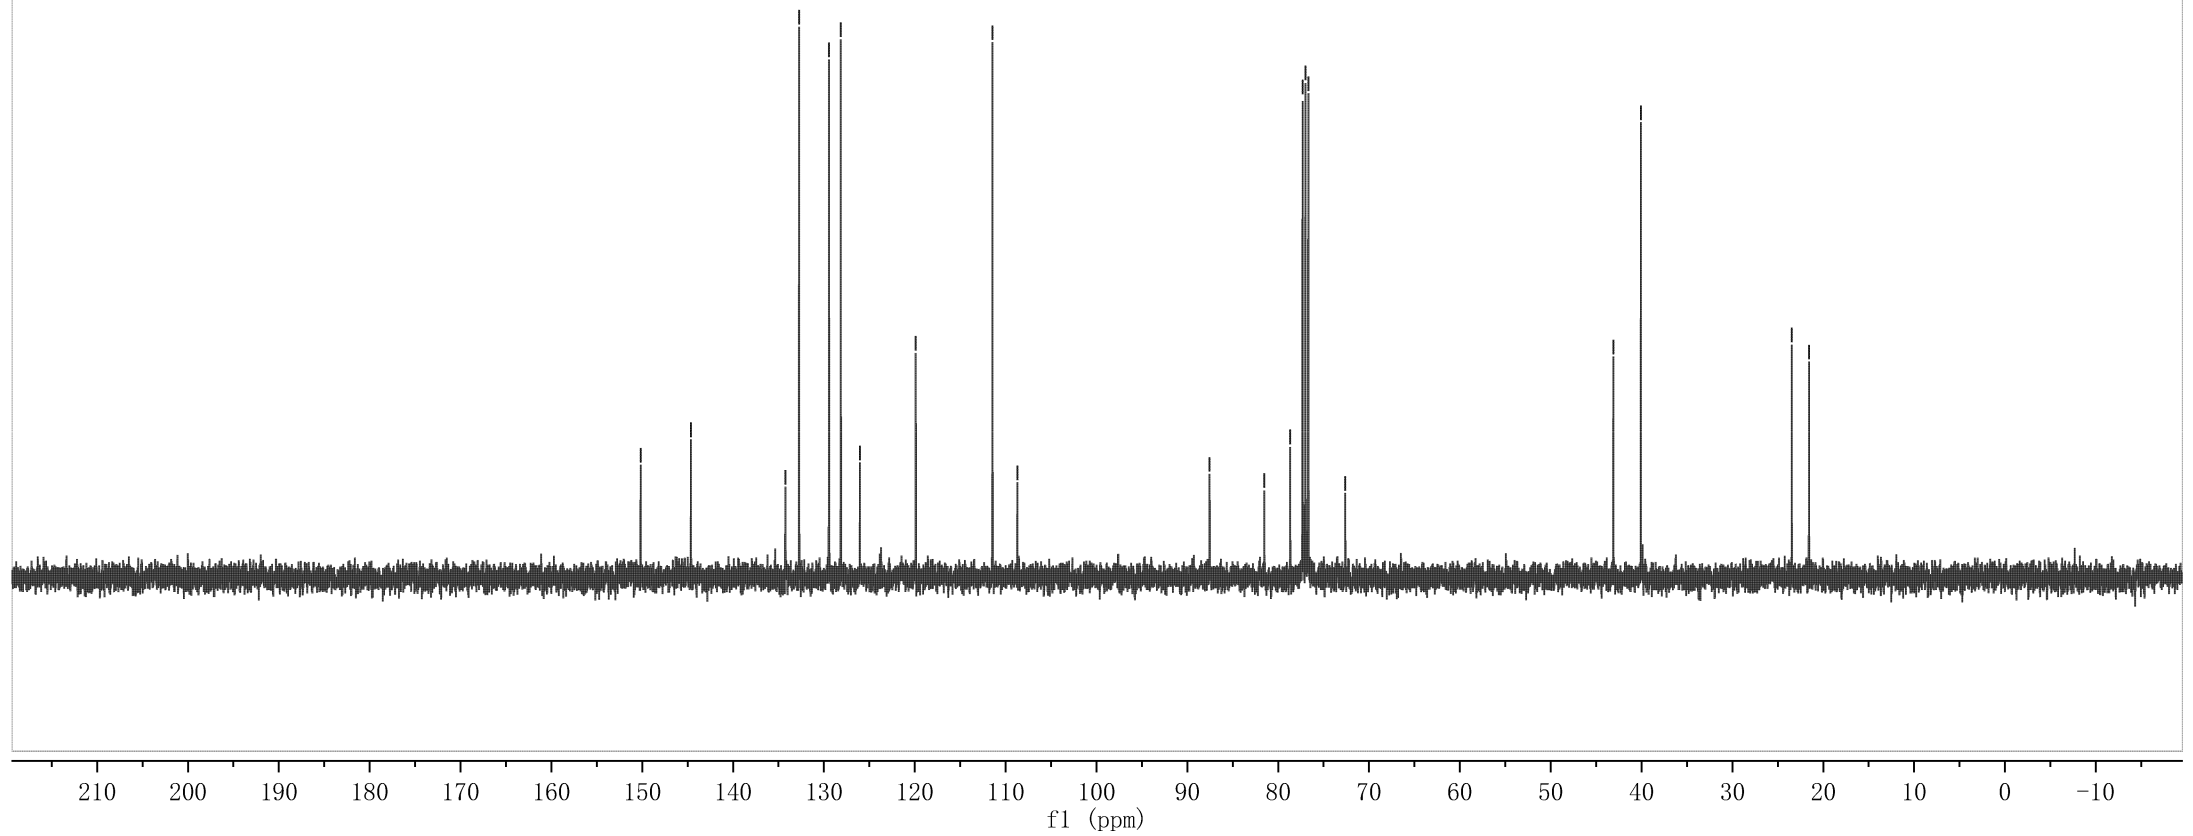

7.870  
7.866  
7.853  
7.849

7.277  
7.257

7.053  
7.036  
6.939  
6.937  
6.550  
6.545  
6.532  
6.527  
6.521

5.878  
5.874  
5.870  
5.864  
5.860  
5.856  
5.853  
5.846  
5.842  
5.839  
5.835  
5.828  
5.825  
5.821

4.448

2.942

2.365

1.758  
1.755  
1.751  
1.682  
1.670  
1.667  
1.652  
1.650

| Parameter                | Value               |
|--------------------------|---------------------|
| 1 Title                  | ZXQ-20-61           |
| 2 Origin                 | Bruker BioSpin GmbH |
| 3 Solvent                | CDC13               |
| 4 Temperature            | 298.3               |
| 5 Number of Scans        | 15                  |
| 6 Acquisition Time       | 3.9846              |
| 7 Acquisition Date       | 2020-04-20T18:03:16 |
| 8 Spectrometer Frequency | 400.03              |
| 9 Spectral Width         | 8223.7              |

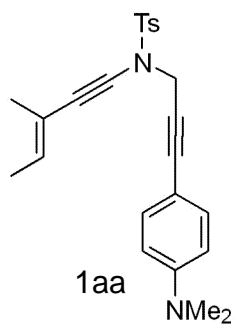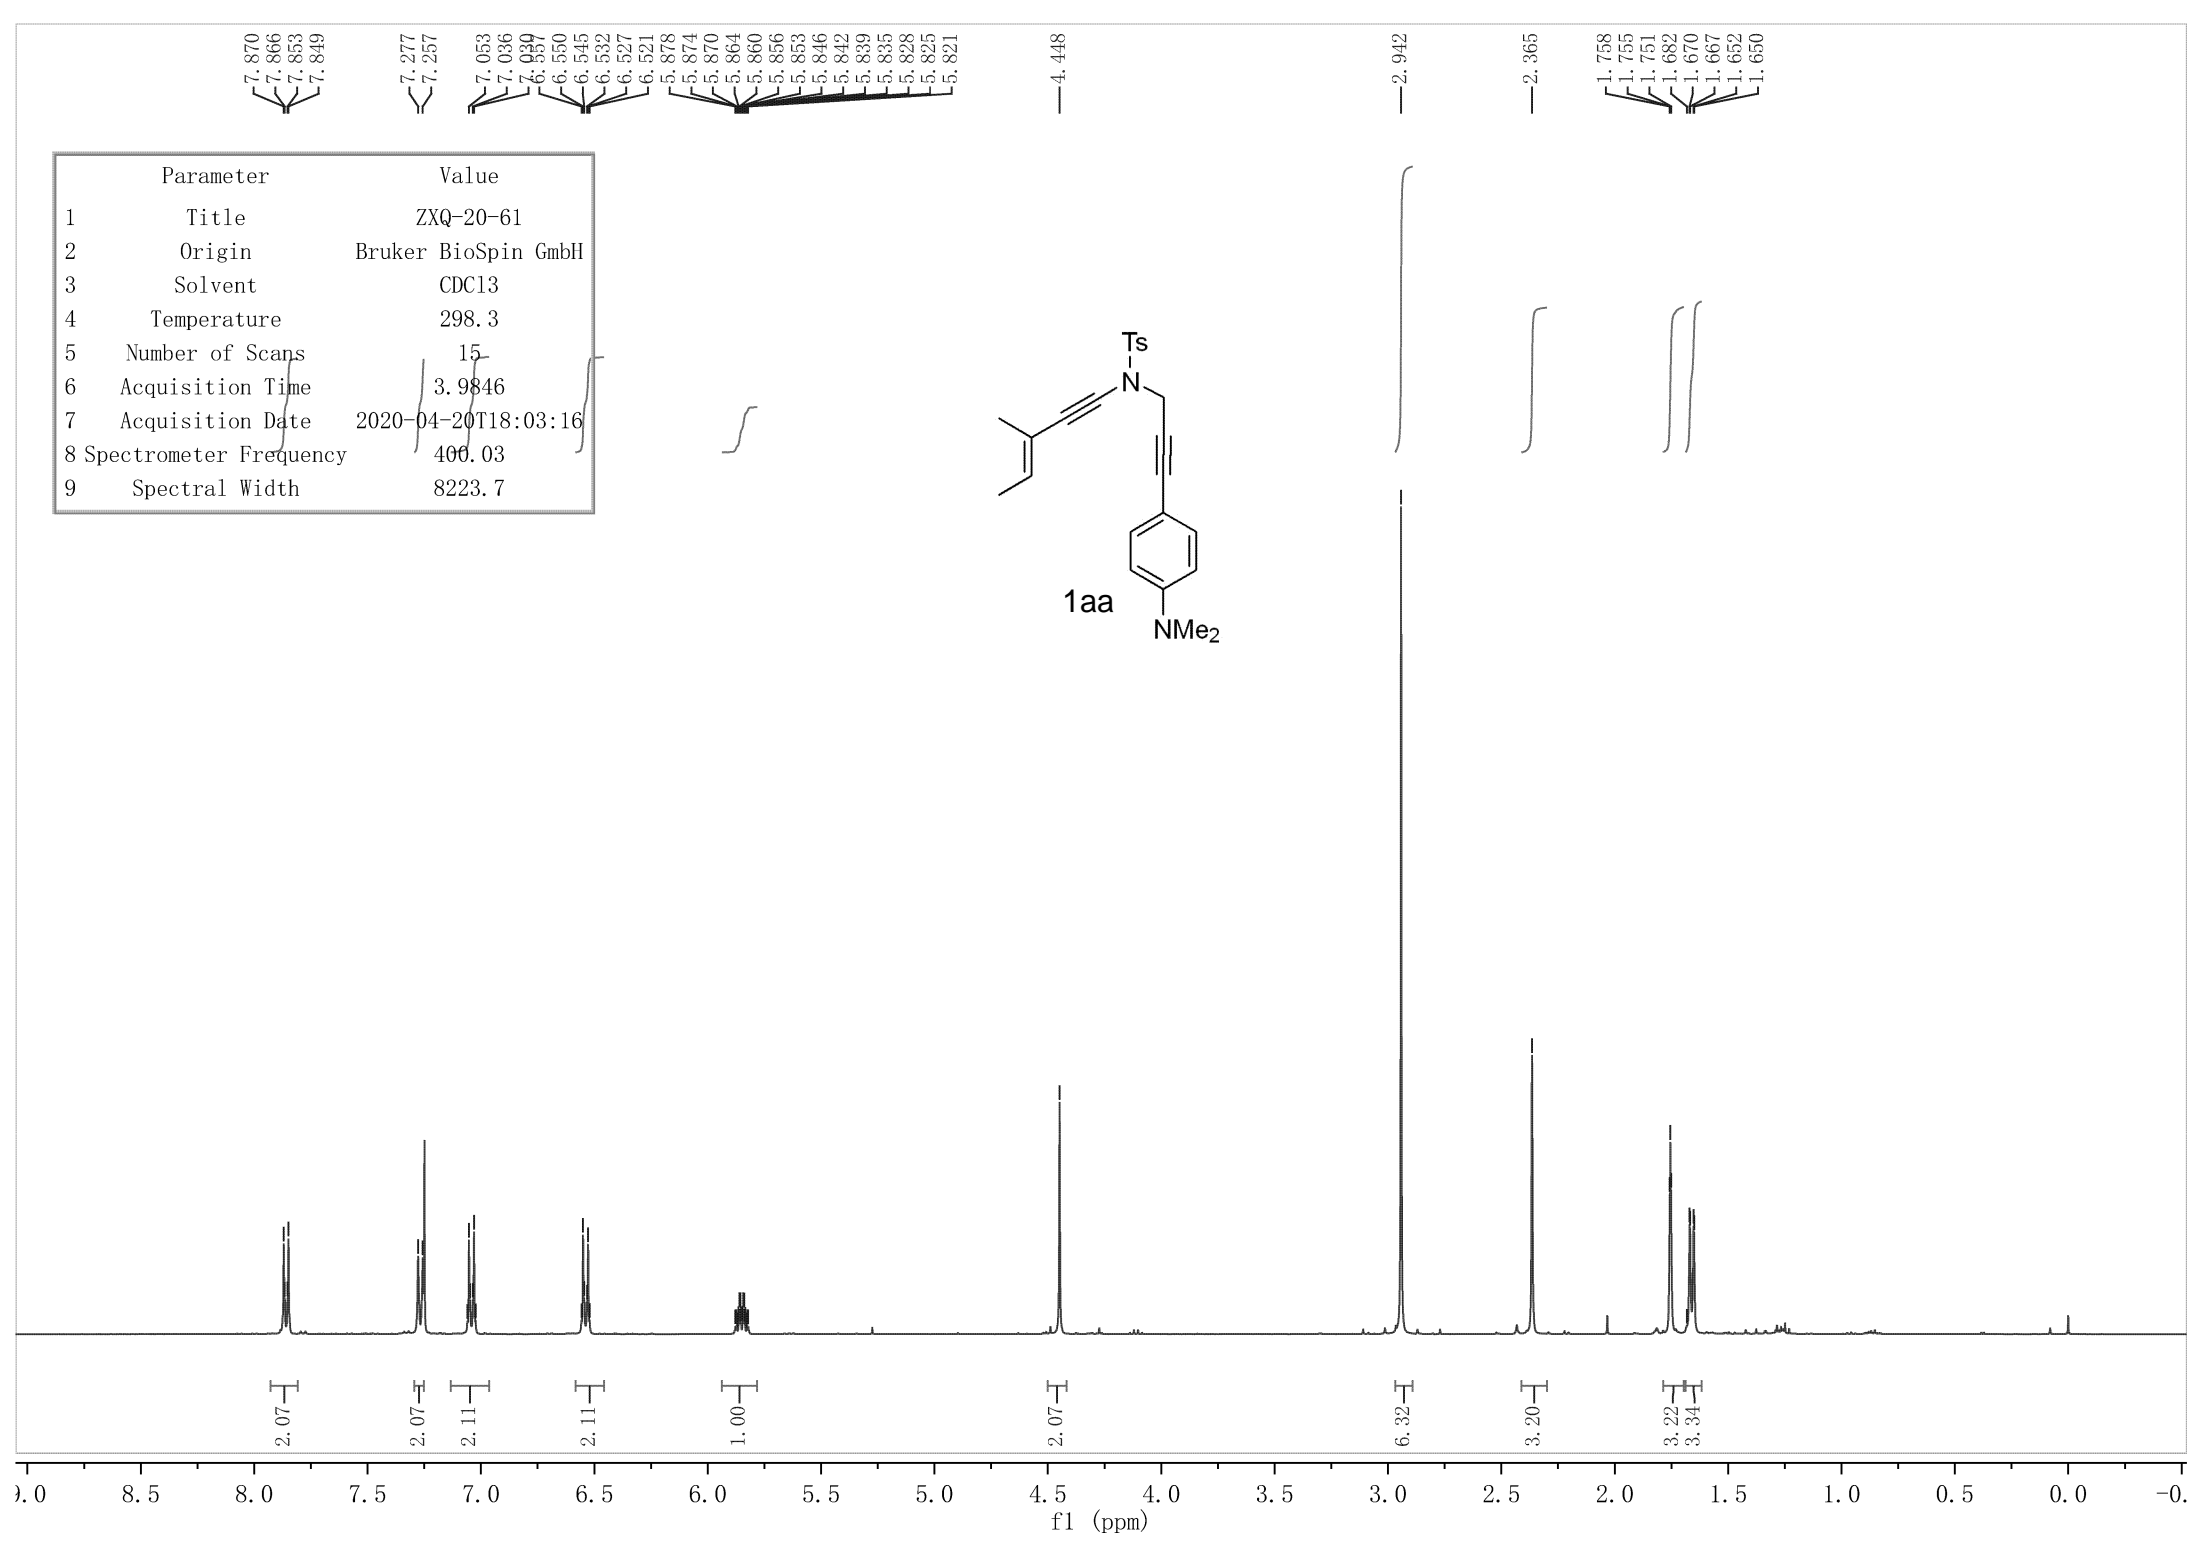

9.0 8.5 8.0 7.5 7.0 6.5 6.0 5.5 5.0 4.5 4.0 3.5 3.0 2.5 2.0 1.5 1.0 0.5 0.0 -0.5

f1 (ppm)

| Parameter                | Value               |
|--------------------------|---------------------|
| 1 Title                  | ZXQ-20-61-C         |
| 2 Origin                 | Bruker BioSpin GmbH |
| 3 Solvent                | CDC13               |
| 4 Temperature            | 298.7               |
| 5 Number of Scans        | 27                  |
| 6 Acquisition Time       | 1.3631              |
| 7 Acquisition Date       | 2020-04-20T18:06:30 |
| 8 Spectrometer Frequency | 100.59              |
| 9 Spectral Width         | 24038.5             |

150.11 144.45 134.29 132.69 131.93 129.34 128.12 117.60 111.40 108.79 87.33 78.81 78.64 77.32 77.00 76.68 73.87 43.17 40.04 21.52 17.07 13.97

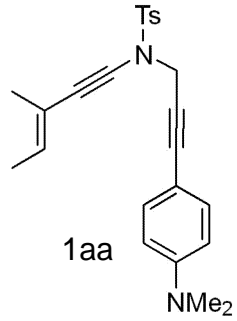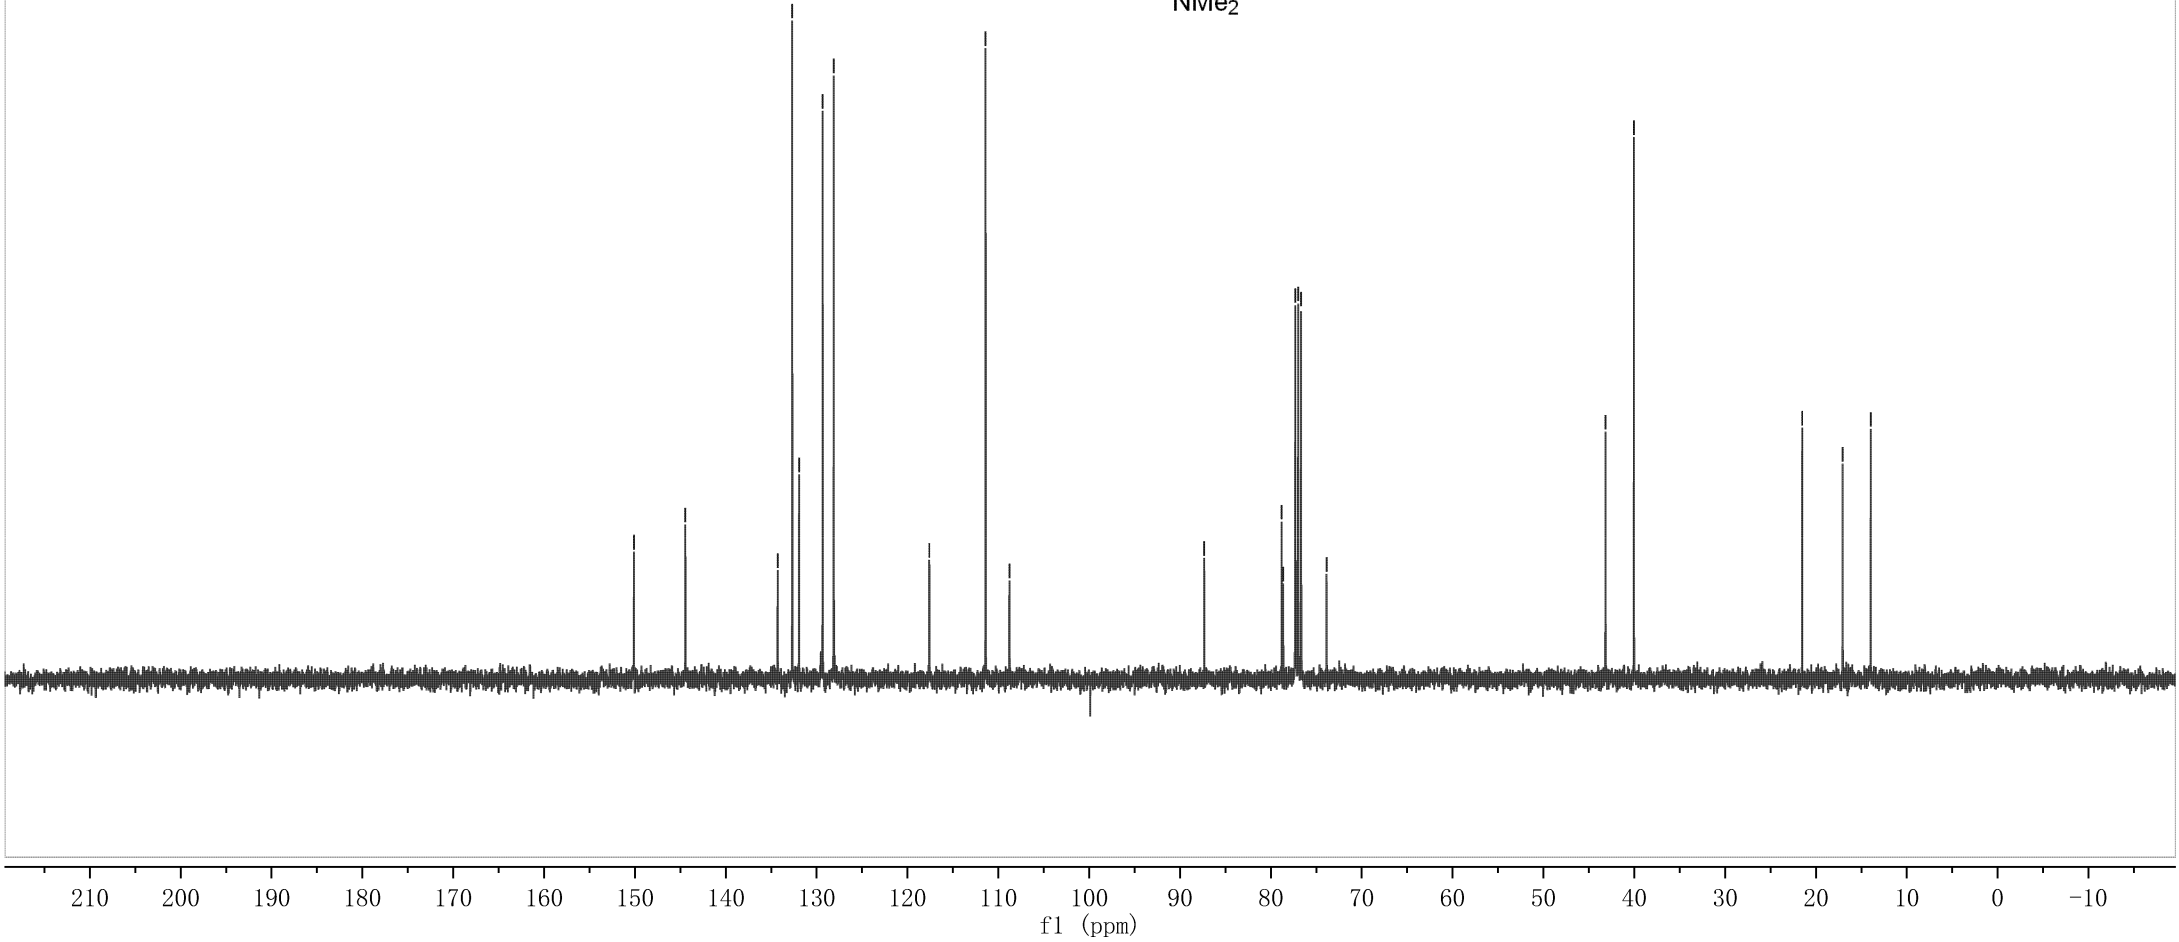

7.907  
7.886  
7.315  
7.297  
7.279  
7.244  
7.229  
7.207  
7.089  
7.071  
6.966  
6.732  
6.557  
6.551  
6.546  
6.533  
6.528  
6.521

4.503  
2.935  
2.375  
2.044  
2.040

| Parameter                | Value               |
|--------------------------|---------------------|
| 1 Title                  | ZXQ-20-62           |
| 2 Origin                 | Bruker BioSpin GmbH |
| 3 Solvent                | CDC13               |
| 4 Temperature            | 298.6               |
| 5 Number of Scans        | 10                  |
| 6 Acquisition Time       | 3.9846              |
| 7 Acquisition Date       | 2020-04-20T21:42:48 |
| 8 Spectrometer Frequency | 400.03              |
| 9 Spectral Width         | 8223.7              |

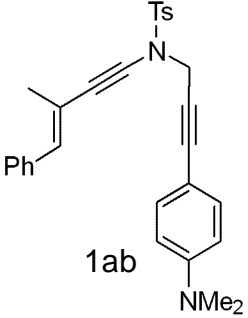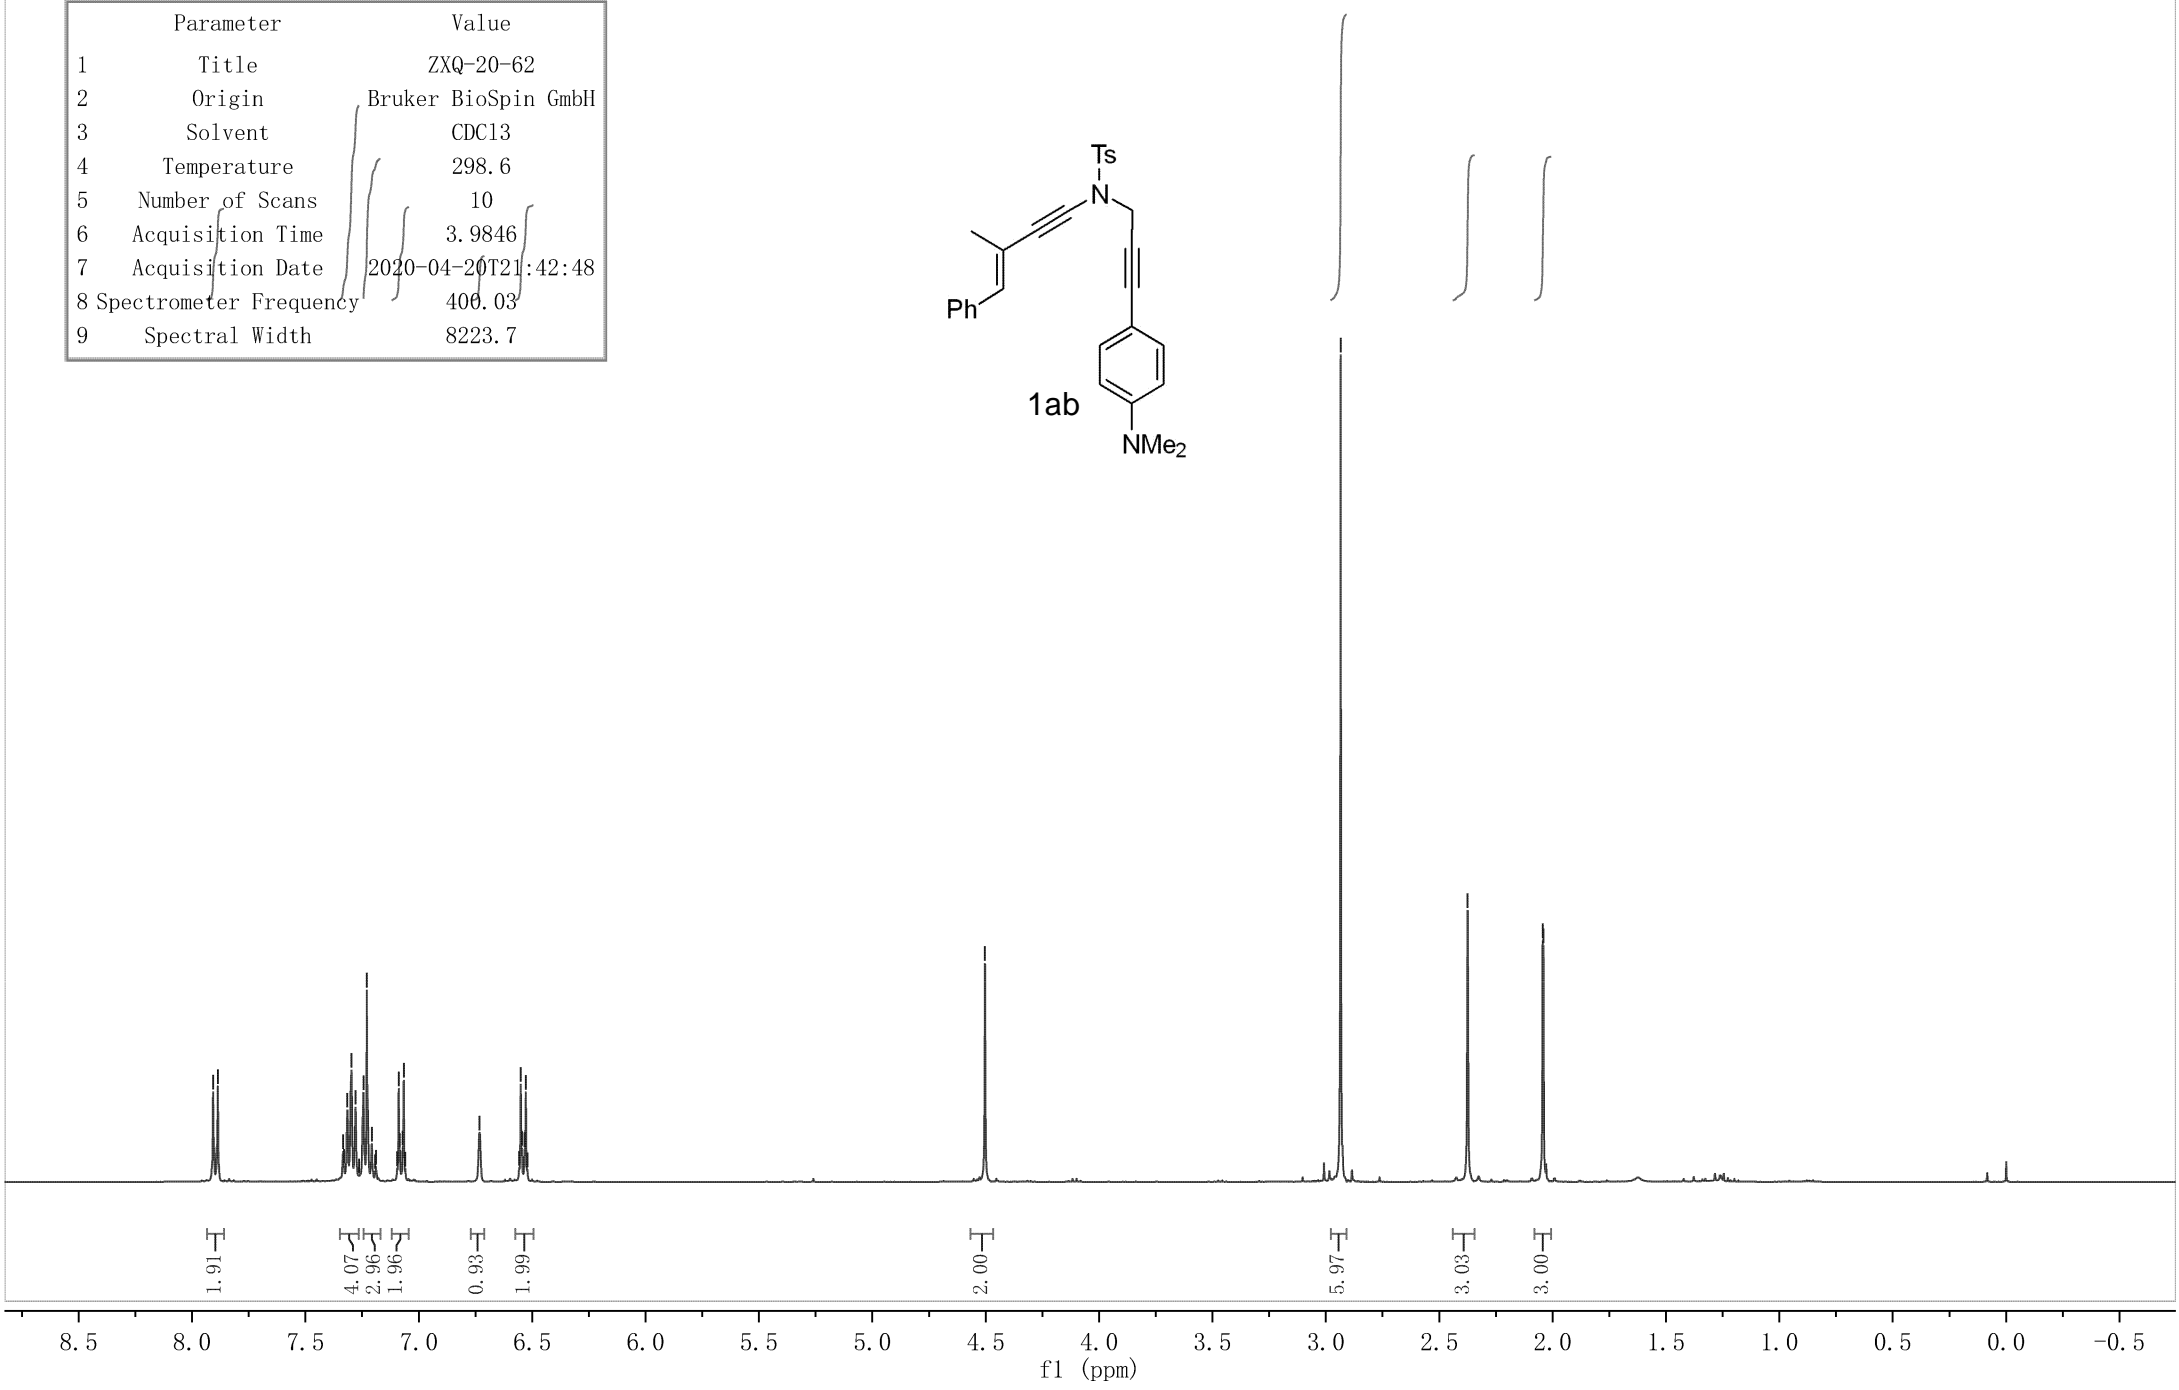

1.91  
4.07  
2.96  
1.96  
0.93  
1.99  
2.00  
5.97  
3.03  
3.00

| Parameter                | Value               |
|--------------------------|---------------------|
| 1 Title                  | ZXQ-20-62-C         |
| 2 Origin                 | Bruker BioSpin GmbH |
| 3 Solvent                | CDC13               |
| 4 Temperature            | 298.8               |
| 5 Number of Scans        | 26                  |
| 6 Acquisition Time       | 1.3631              |
| 7 Acquisition Date       | 2020-04-20T21:45:23 |
| 8 Spectrometer Frequency | 100.59              |
| 9 Spectral Width         | 24038.5             |

150.18 144.64 136.83 134.49 134.29 132.75 129.48 128.81 128.13 126.88 119.16 111.45 108.68 87.64 81.49 78.76 77.32 77.00 76.68 75.00 43.21 40.05 21.56 19.30

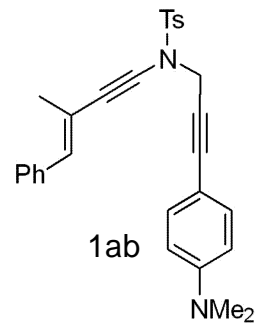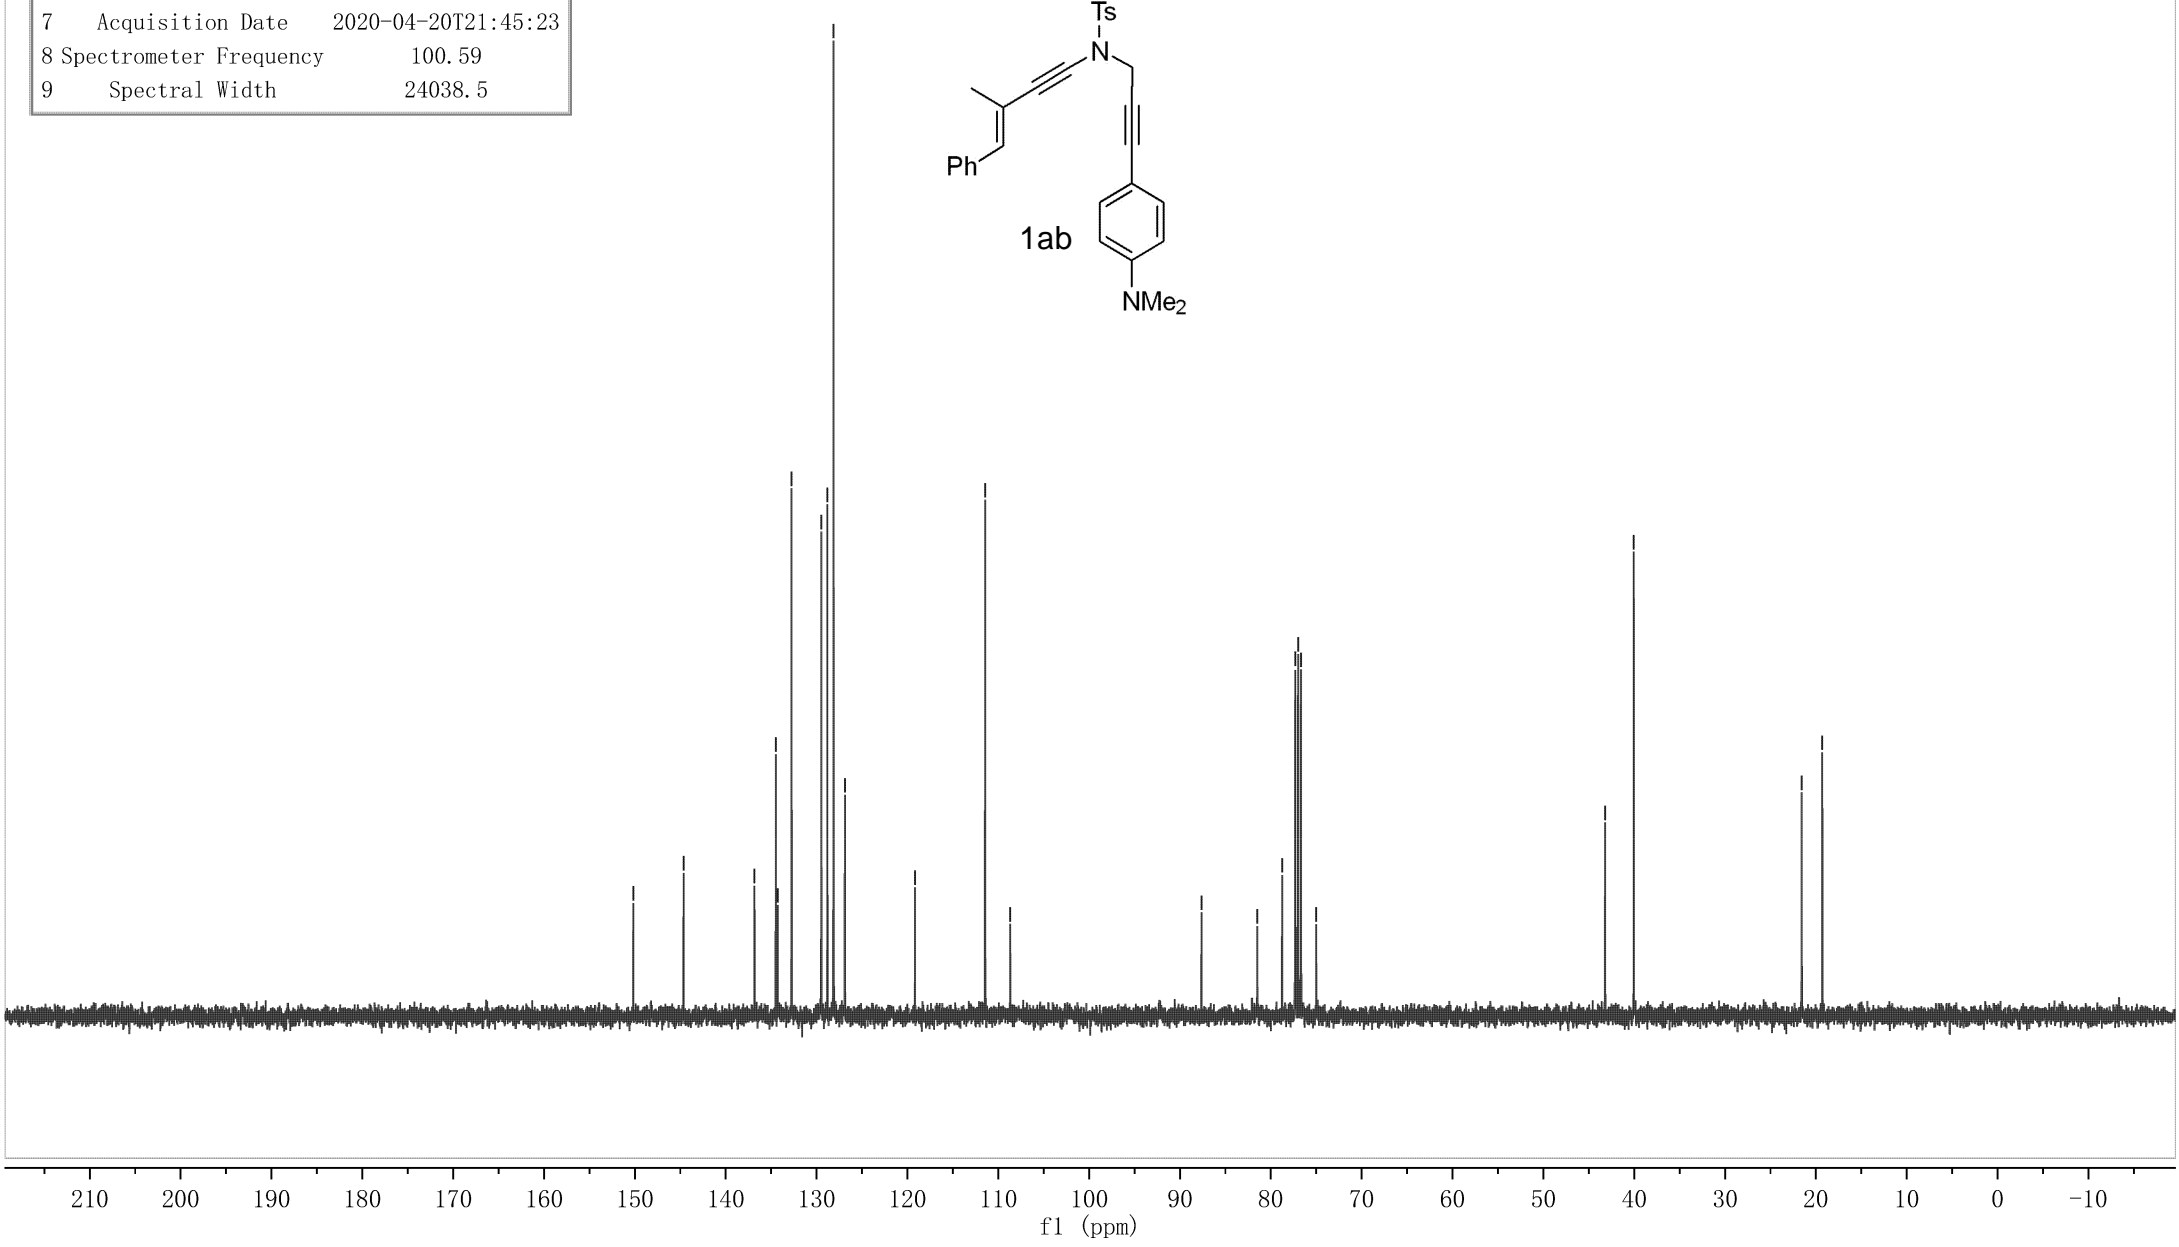

| Parameter                | Value               |
|--------------------------|---------------------|
| 1 Title                  | ZXQ-20-27           |
| 2 Origin                 | Bruker BioSpin GmbH |
| 3 Solvent                | CDC13               |
| 4 Temperature            | 298.0               |
| 5 Number of Scans        | 7                   |
| 6 Acquisition Time       | 4.0894              |
| 7 Acquisition Date       | 2020-04-09T18:05:49 |
| 8 Spectrometer Frequency | 400.13              |
| 9 Spectral Width         | 8012.8              |

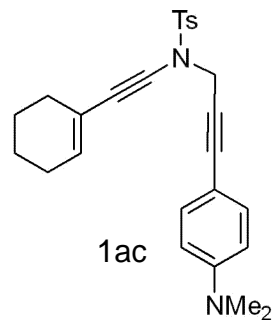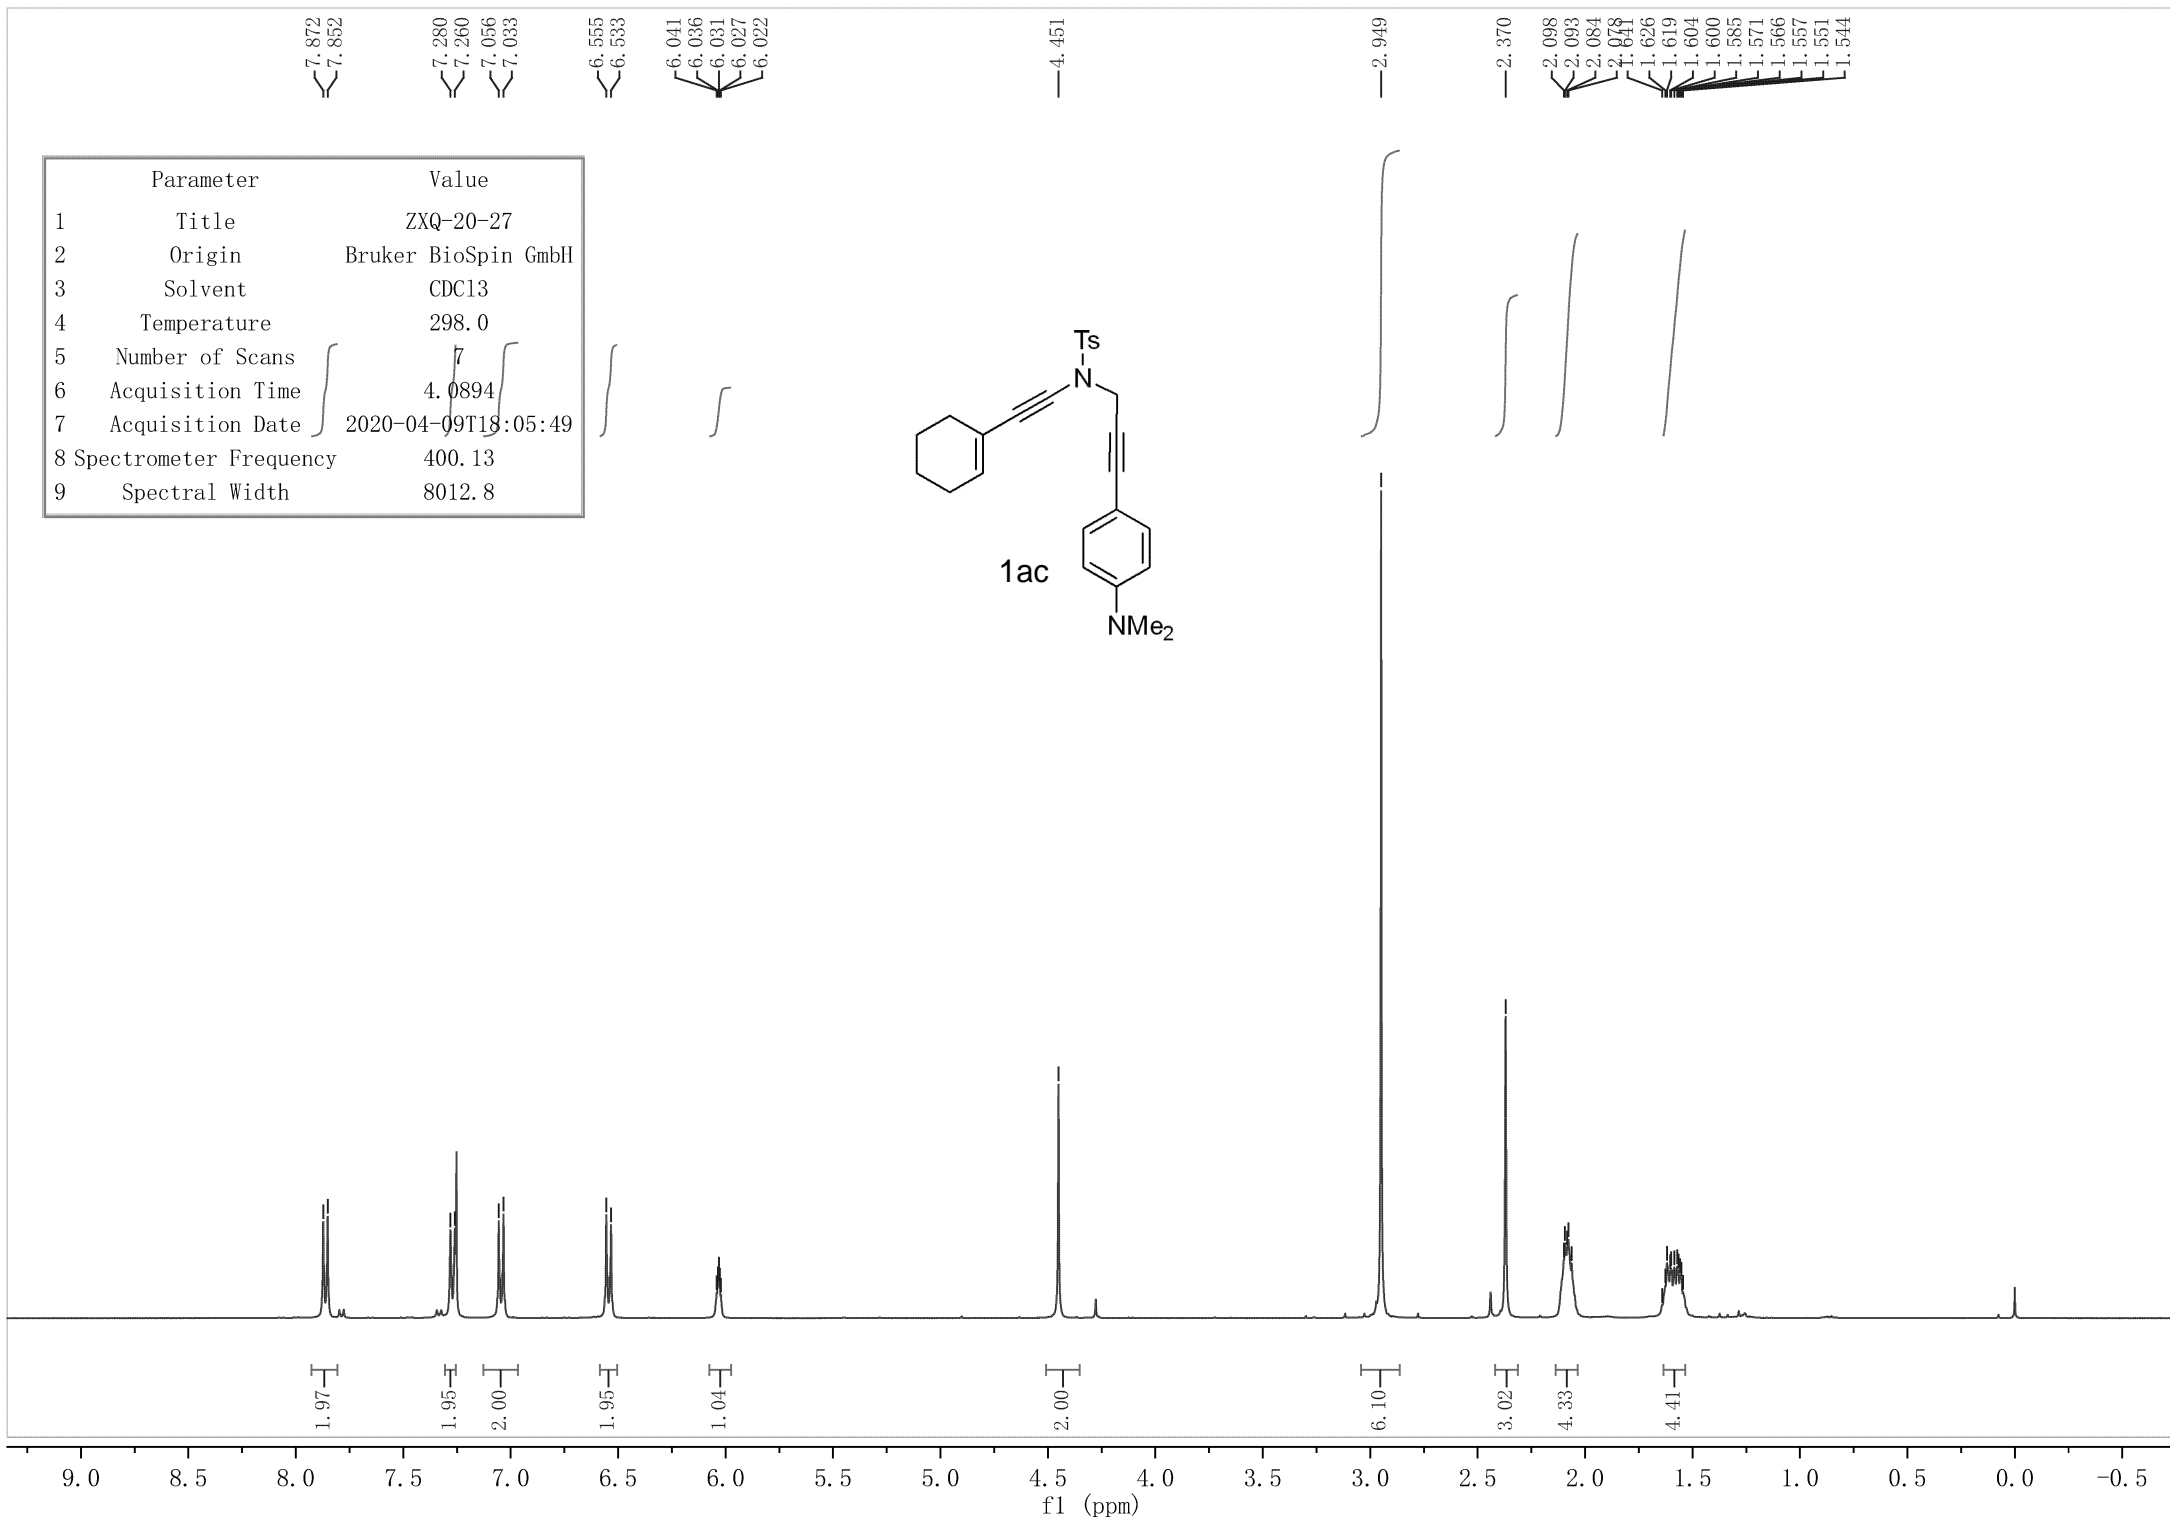



| Parameter                | Value               |
|--------------------------|---------------------|
| 1 Title                  | ZXQ-20-27-C         |
| 2 Origin                 | Bruker BioSpin GmbH |
| 3 Solvent                | CDC13               |
| 4 Temperature            | 300.0               |
| 5 Number of Scans        | 25                  |
| 6 Acquisition Time       | 1.3631              |
| 7 Acquisition Date       | 2020-04-09T18:07:44 |
| 8 Spectrometer Frequency | 100.61              |
| 9 Spectral Width         | 24038.5             |

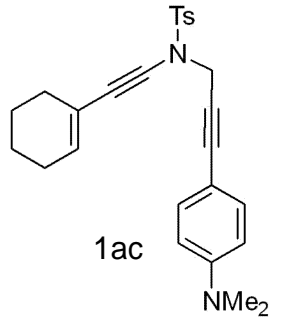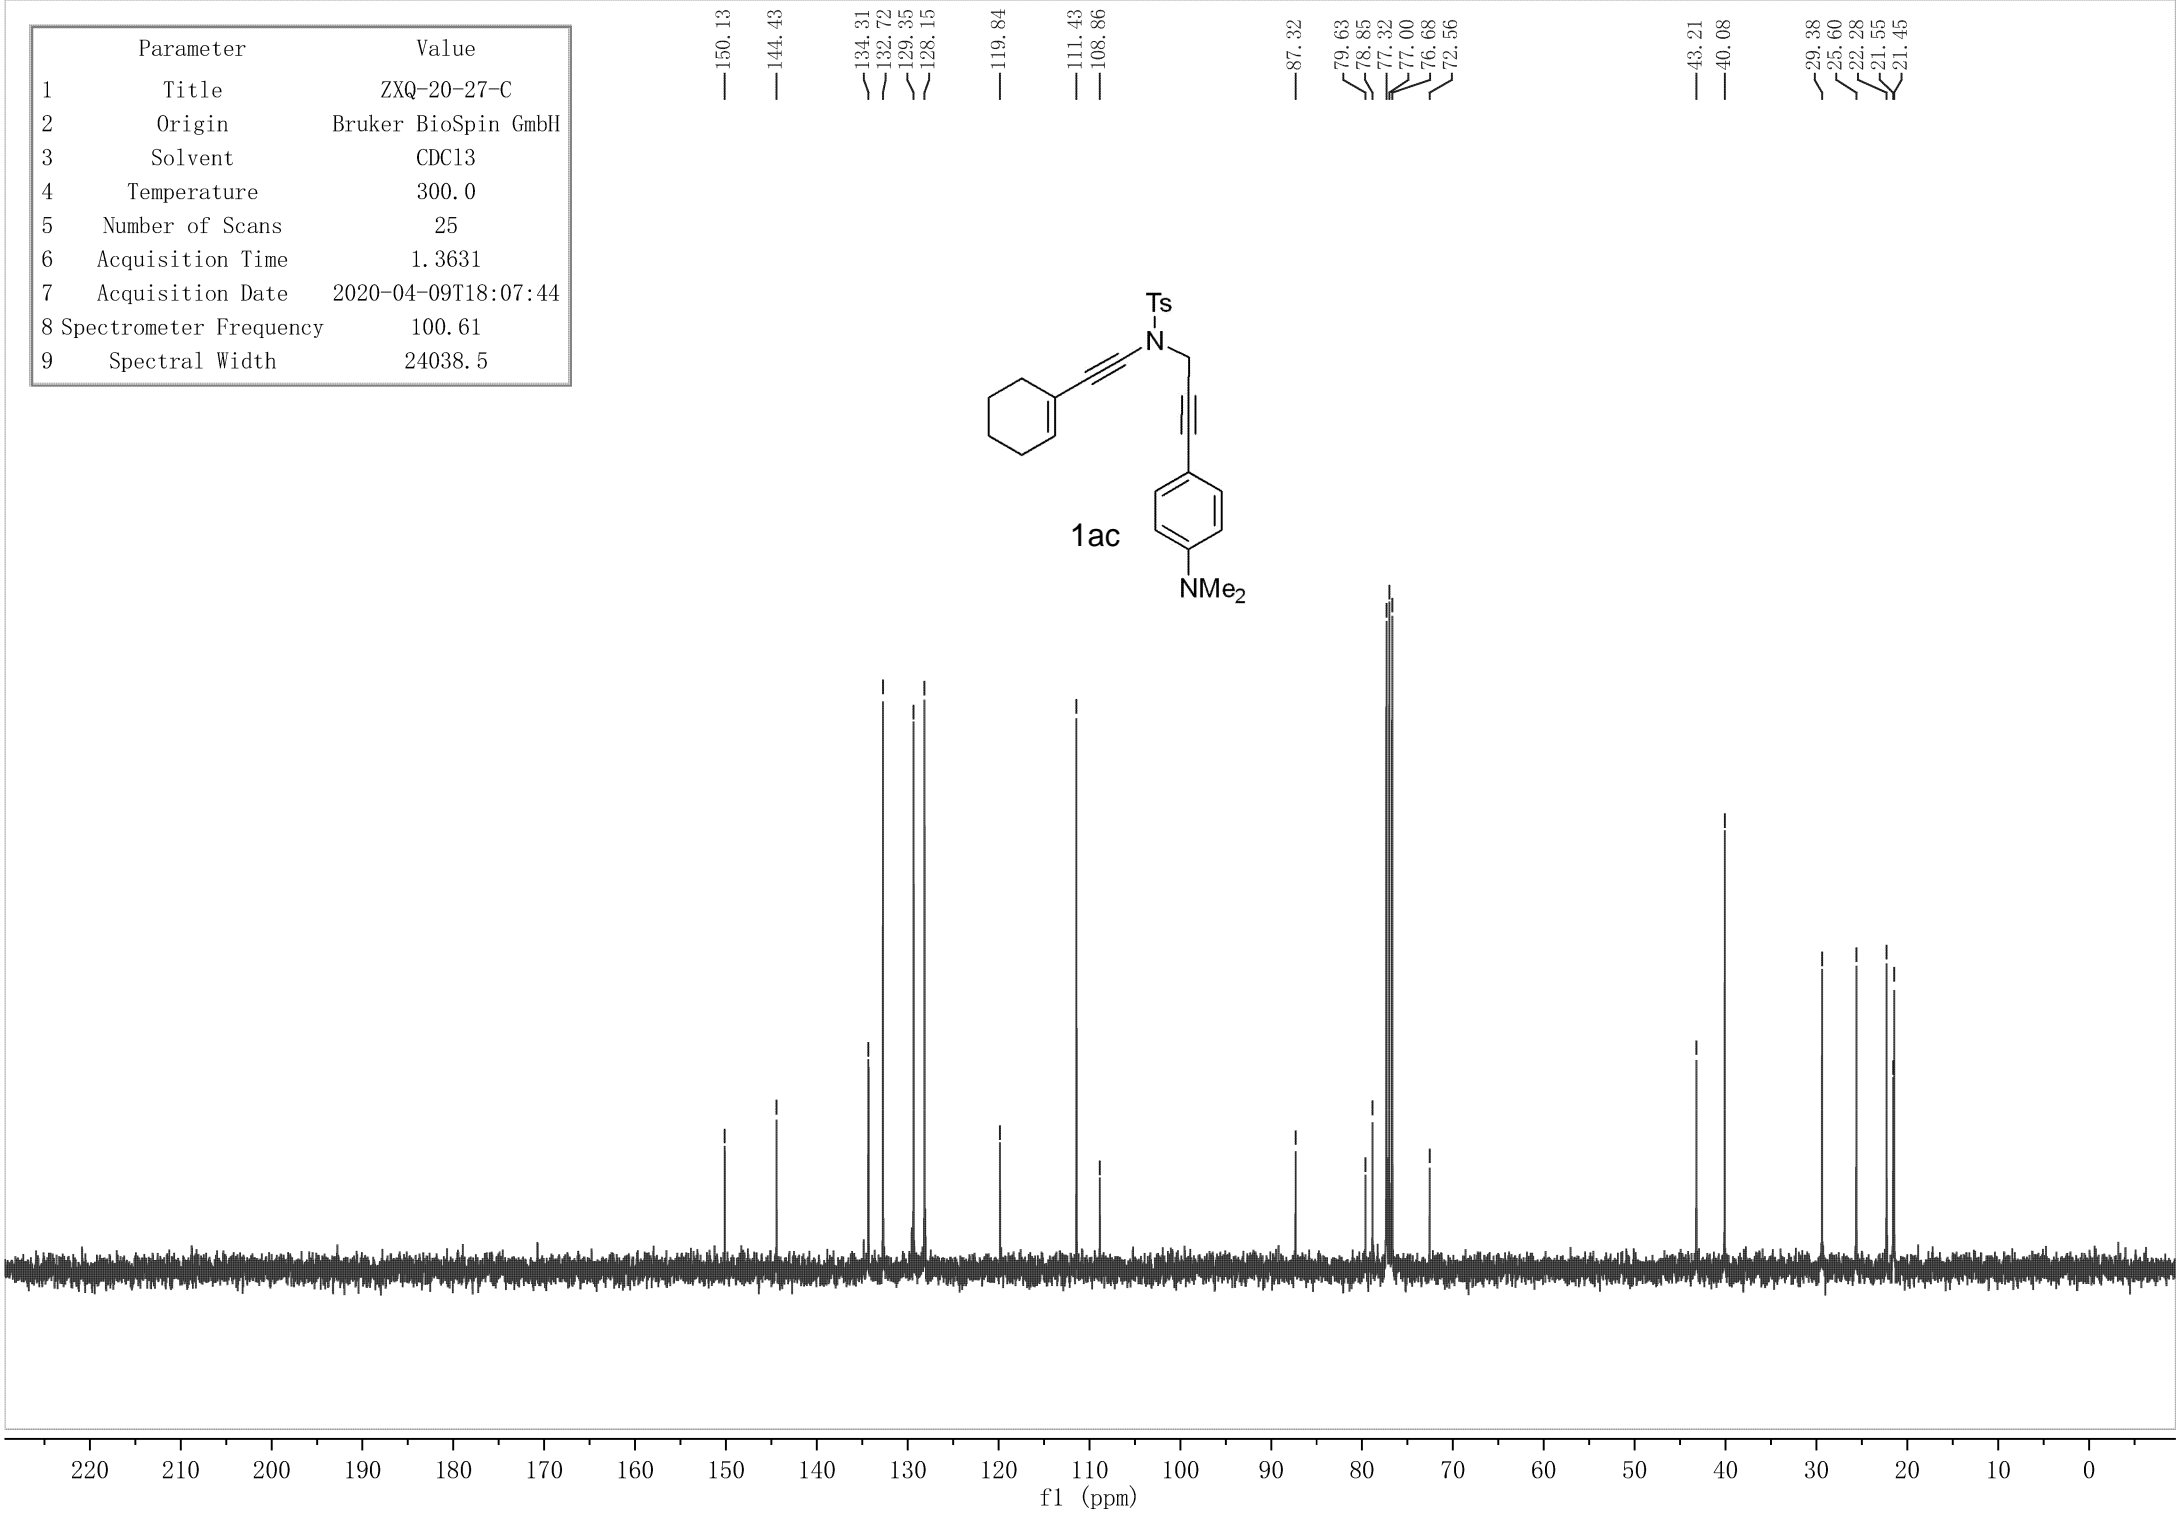

| Parameter                | Value               |
|--------------------------|---------------------|
| 1 Title                  | ZXQ-20-73           |
| 2 Origin                 | Bruker BioSpin GmbH |
| 3 Solvent                | CDCl3               |
| 4 Temperature            | 298.1               |
| 5 Number of Scans        | 7                   |
| 6 Acquisition Time       | 3.9846              |
| 7 Acquisition Date       | 2020-04-21T22:01:45 |
| 8 Spectrometer Frequency | 400.03              |
| 9 Spectral Width         | 8223.7              |

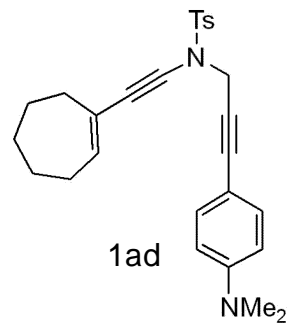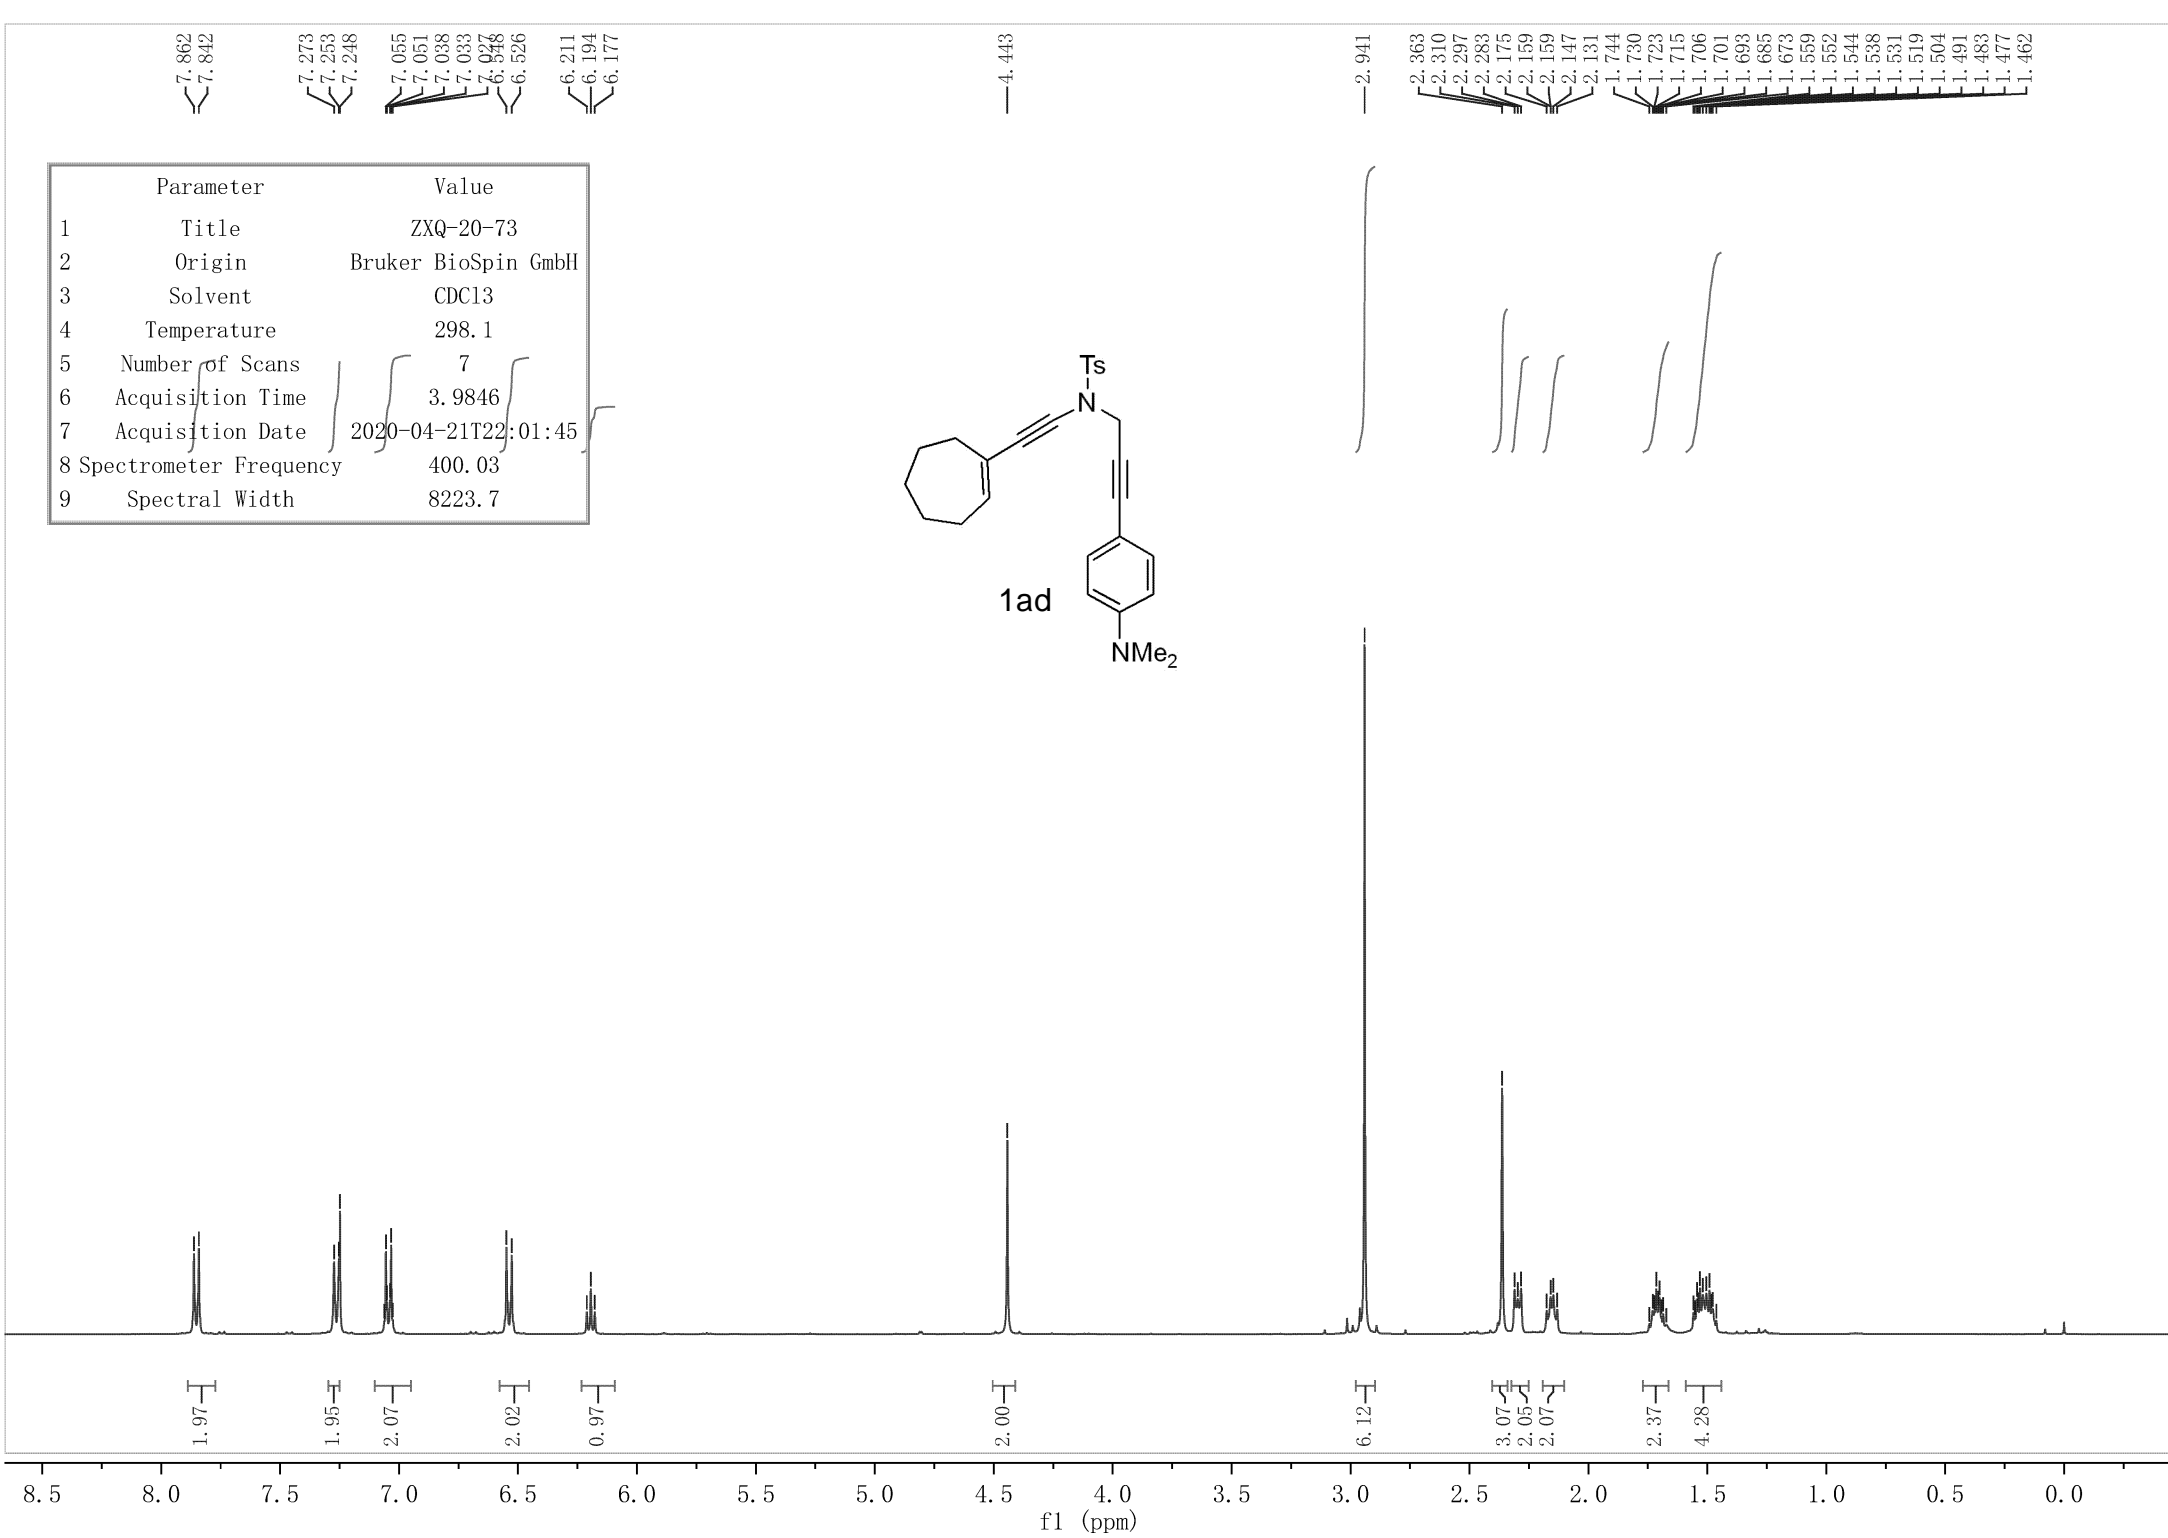

| Parameter                | Value               |
|--------------------------|---------------------|
| 1 Title                  | ZXQ-20-73-C         |
| 2 Origin                 | Bruker BioSpin GmbH |
| 3 Solvent                | CDC13               |
| 4 Temperature            | 298.6               |
| 5 Number of Scans        | 32                  |
| 6 Acquisition Time       | 1.3631              |
| 7 Acquisition Date       | 2020-04-21T22:04:39 |
| 8 Spectrometer Frequency | 100.59              |
| 9 Spectral Width         | 24038.5             |

150.09 144.42 138.84 134.28 132.68 129.32 128.09 125.88  
 111.38 108.77 87.35 79.71 78.85 77.32 77.00 76.68 74.29  
 43.16 40.03 34.41 31.97 29.03 26.45 26.42 21.51

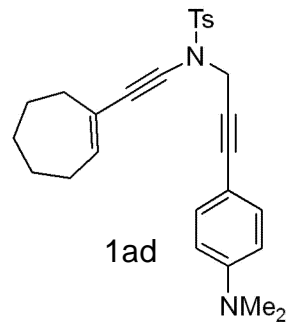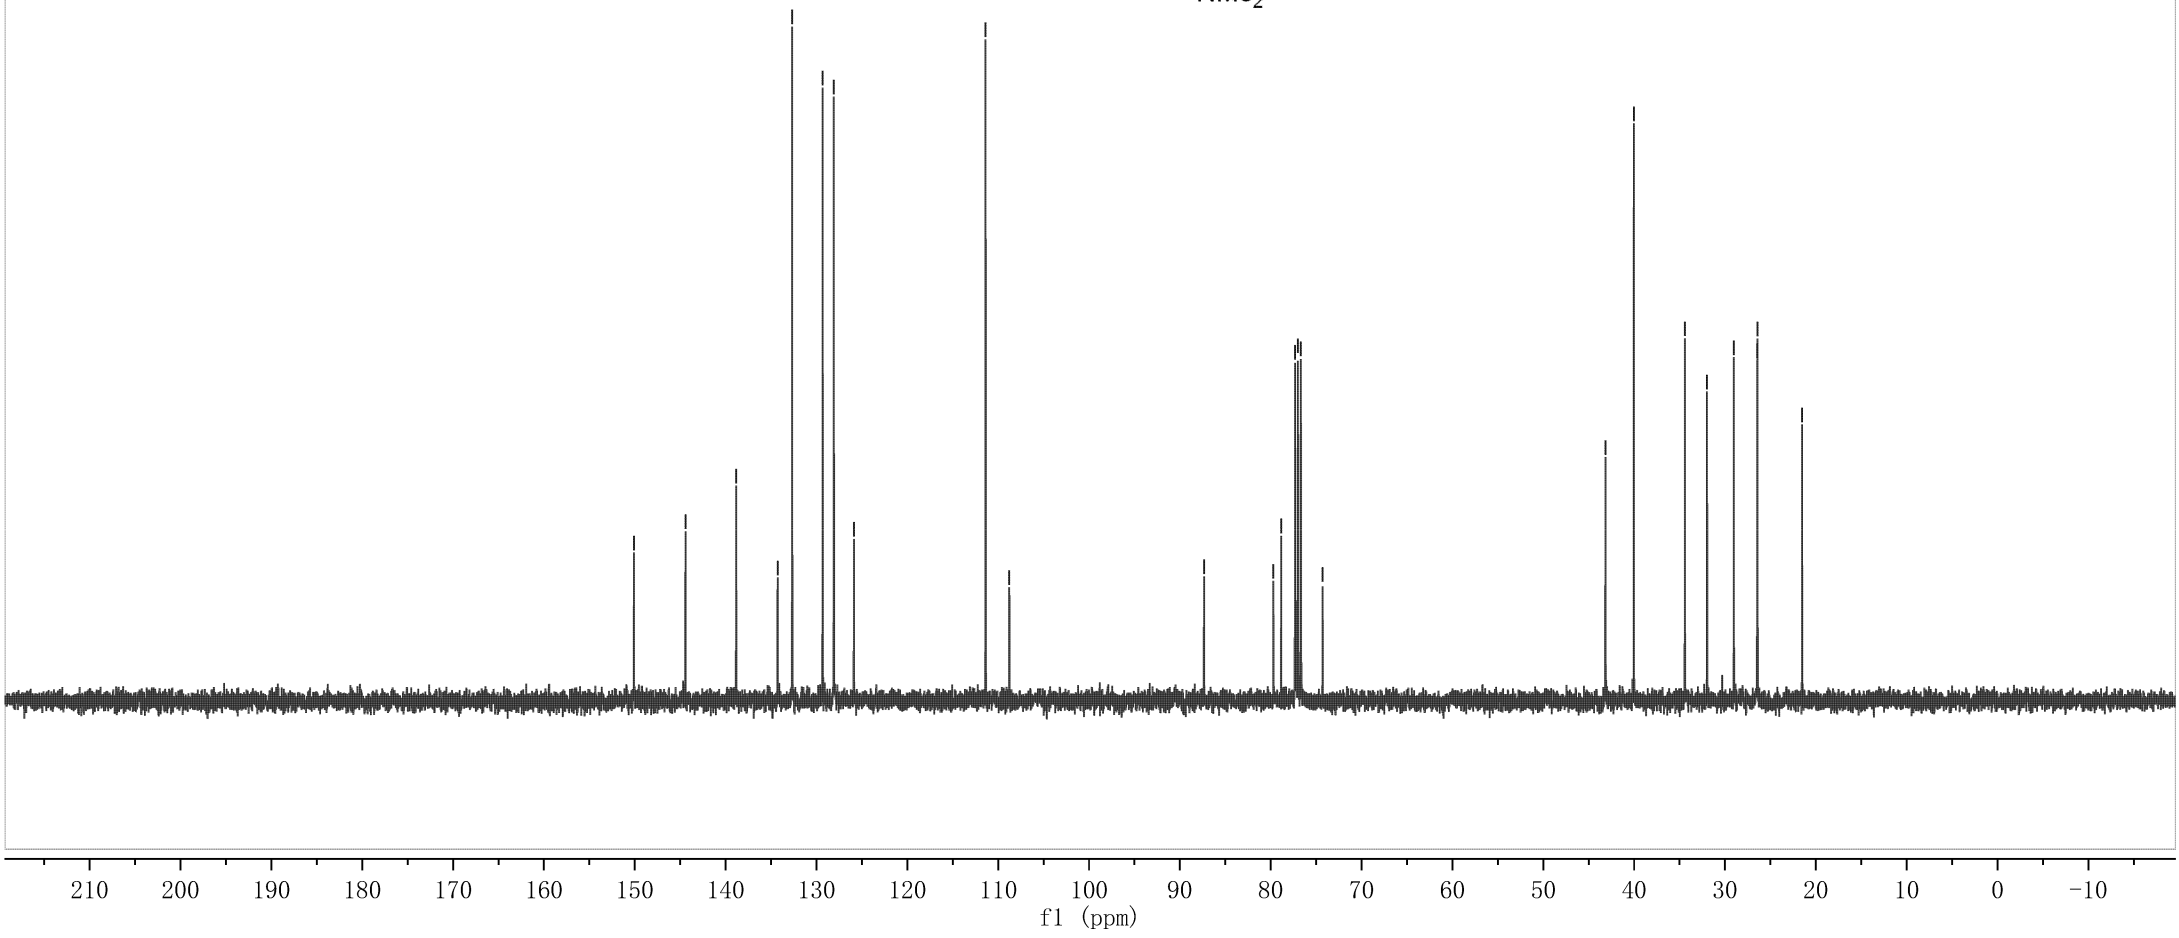

| Parameter                | Value               |
|--------------------------|---------------------|
| 1 Title                  | ZXQ-20-74           |
| 2 Origin                 | Bruker BioSpin GmbH |
| 3 Solvent                | CDC13               |
| 4 Temperature            | 298.1               |
| 5 Number of Scans        | 7                   |
| 6 Acquisition Time       | 3.9846              |
| 7 Acquisition Date       | 2020-04-22T10:51:09 |
| 8 Spectrometer Frequency | 400.03              |
| 9 Spectral Width         | 8223.7              |

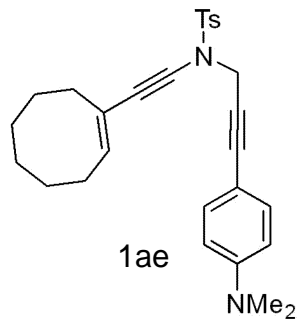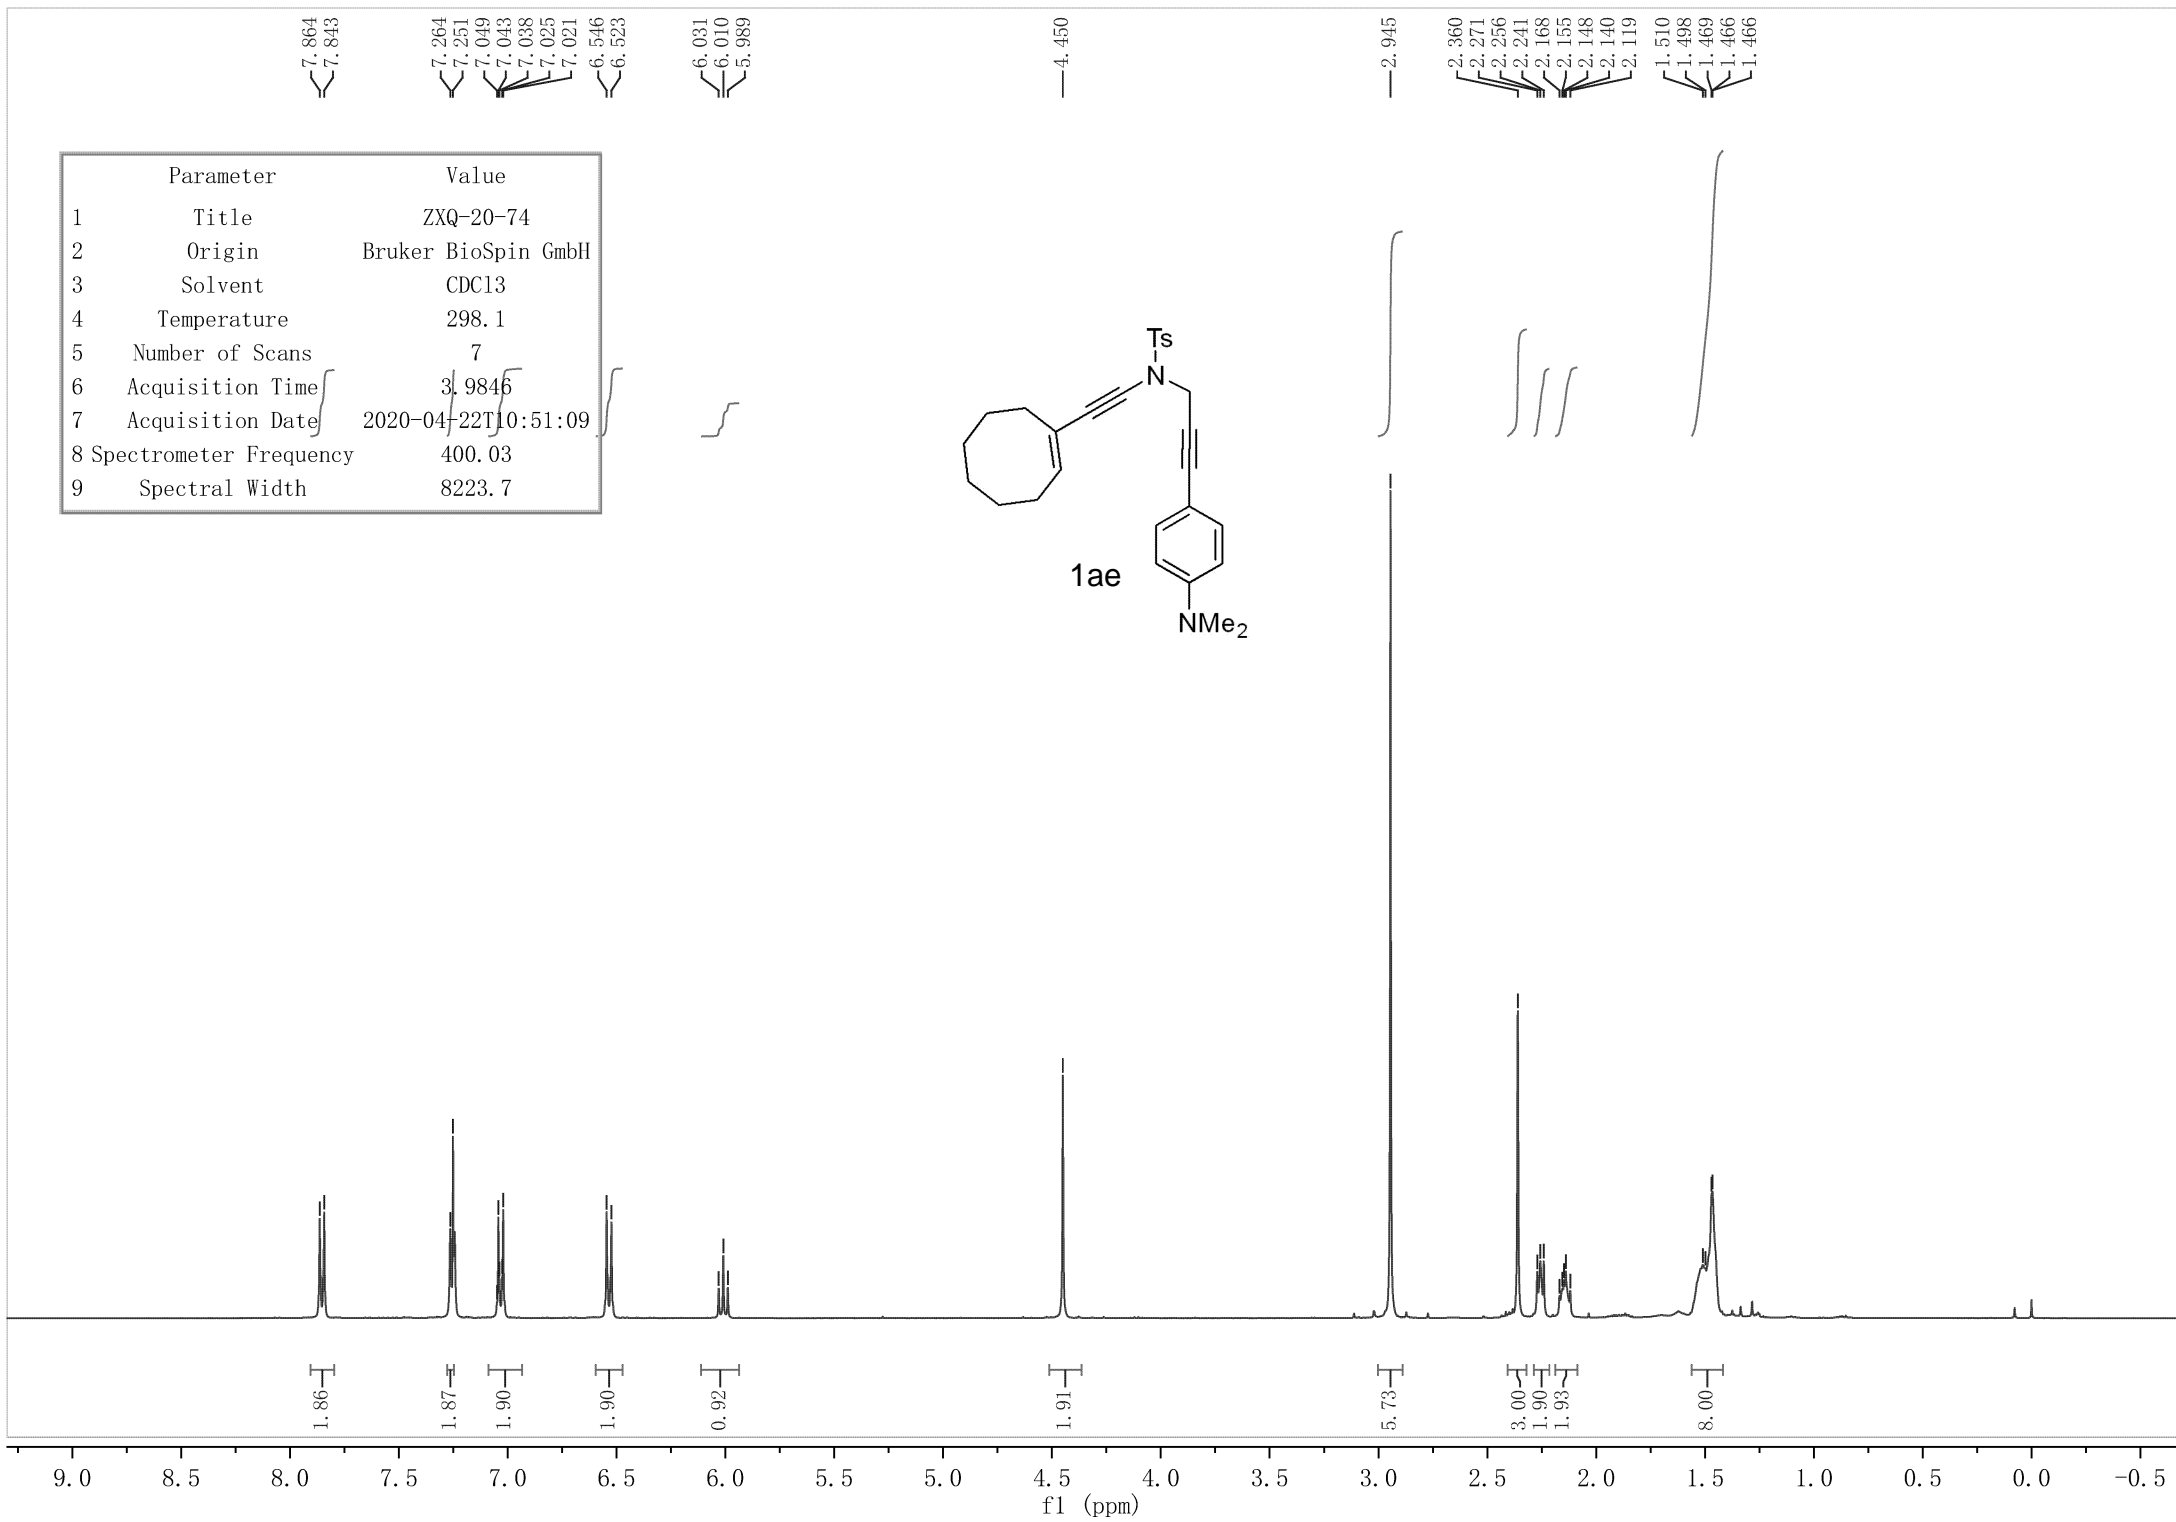

7.864  
7.843

7.264  
7.251  
7.049  
7.038  
7.025  
7.021  
6.546  
6.523

6.031  
6.010  
5.989

4.450

2.945

2.360  
2.271  
2.256  
2.241  
2.168  
2.155  
2.148  
2.140  
2.119  
1.510  
1.498  
1.469  
1.466  
1.466

| Parameter                | Value               |
|--------------------------|---------------------|
| 1 Title                  | ZXQ-20-74-C         |
| 2 Origin                 | Bruker BioSpin GmbH |
| 3 Solvent                | CDC13               |
| 4 Temperature            | 298.5               |
| 5 Number of Scans        | 29                  |
| 6 Acquisition Time       | 1.3631              |
| 7 Acquisition Date       | 2020-04-22T10:54:03 |
| 8 Spectrometer Frequency | 100.59              |
| 9 Spectral Width         | 24038.5             |

150.10 144.43 136.71 134.19 132.67 129.29 128.17 122.79 111.39 108.82 87.37 79.40 78.81 77.32 77.00 76.68 73.34 43.21 40.06 30.10 29.74 28.23 26.95 26.34 25.68 21.53

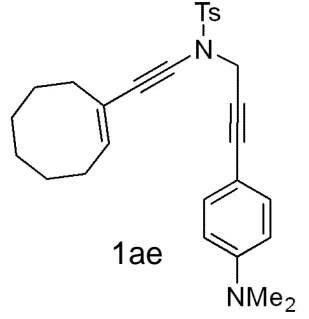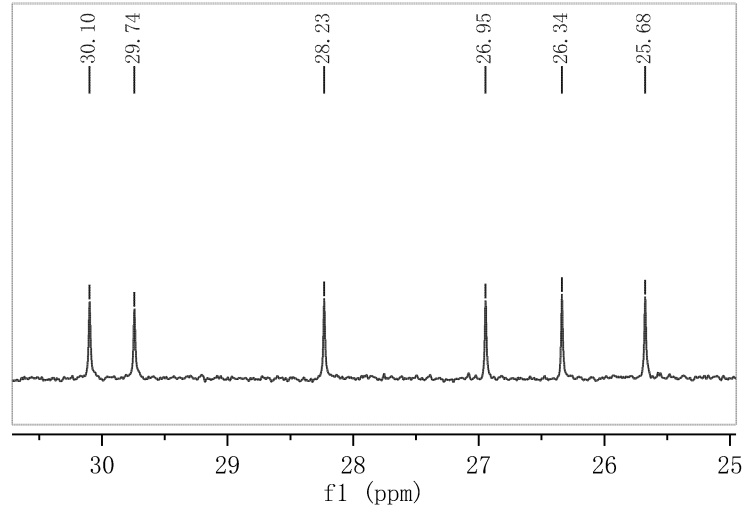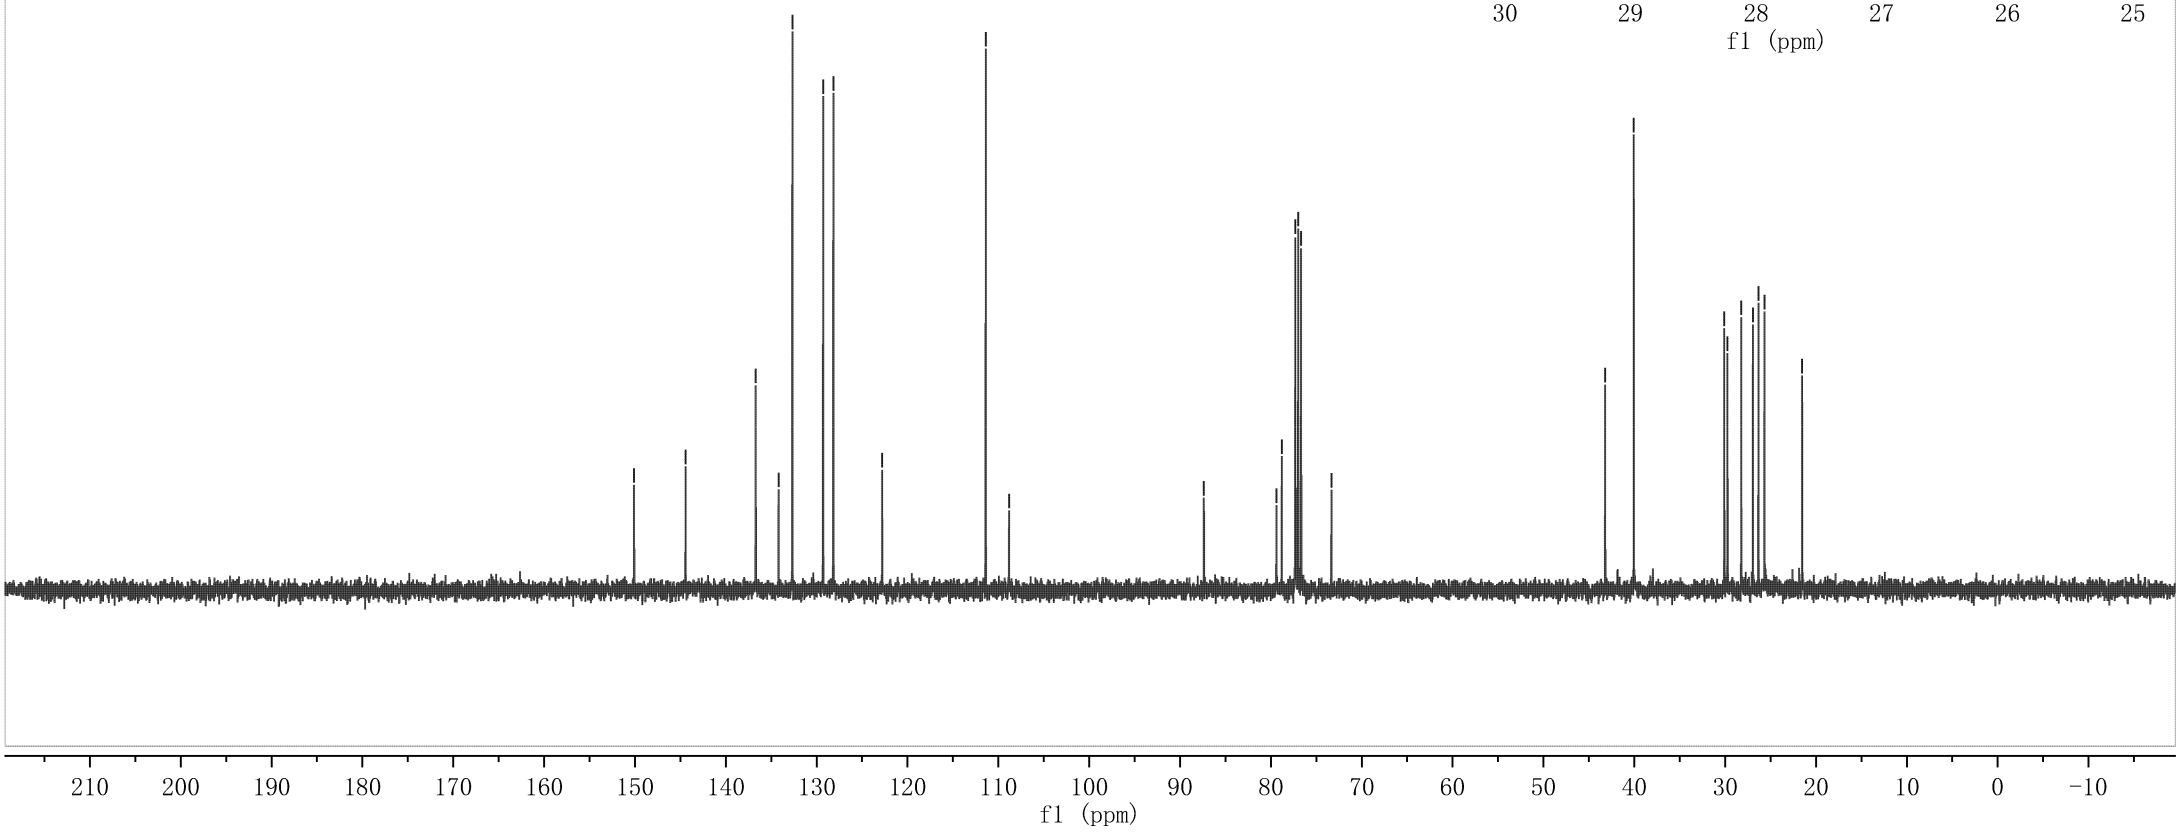

7.905  
7.884  
7.347  
7.302  
7.289  
7.269  
7.269  
7.237  
7.218  
7.173  
7.078  
7.056  
6.958  
6.934  
6.522

| Parameter                | Value               |
|--------------------------|---------------------|
| 1 Title                  | ZXQ-20-30           |
| 2 Origin                 | Bruker BioSpin GmbH |
| 3 Solvent                | CDC13               |
| 4 Temperature            | 298.0               |
| 5 Number of Scans        | 8                   |
| 6 Acquisition Time       | 4.0894              |
| 7 Acquisition Date       | 2020-04-10 10:15:12 |
| 8 Spectrometer Frequency | 400.13              |
| 9 Spectral Width         | 8012.8              |

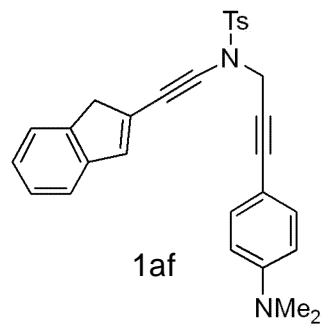

4.530  
3.472  
2.927  
2.364

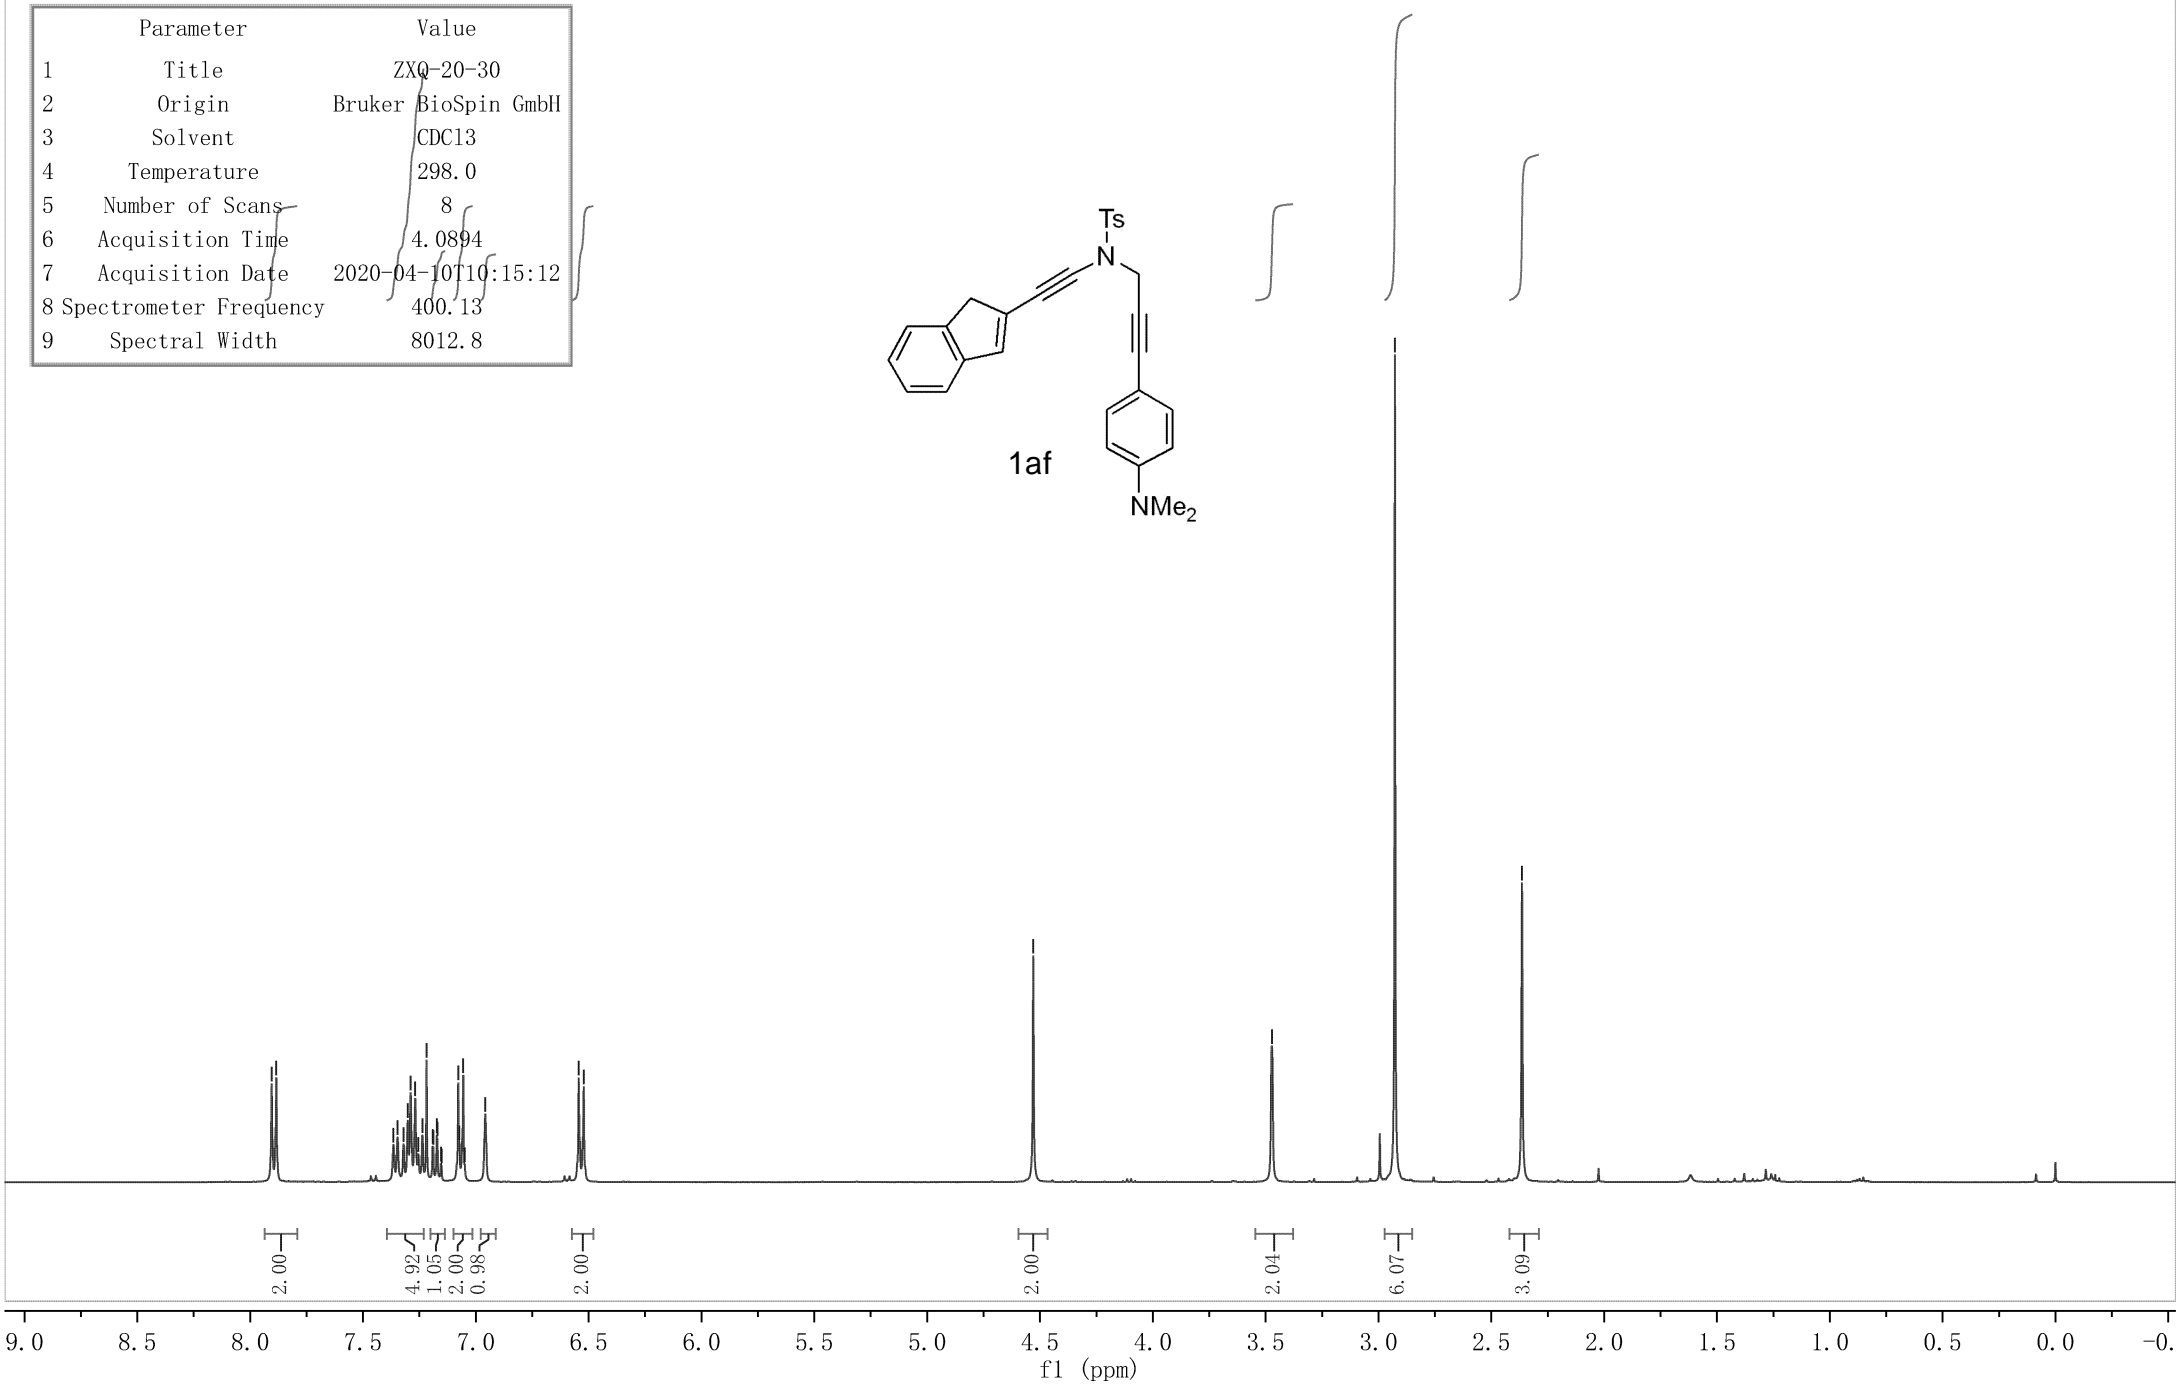

2.00  
4.92  
1.05  
2.00  
0.98  
2.00  
2.00  
2.04  
6.07  
3.09

| Parameter                | Value               |
|--------------------------|---------------------|
| 1 Title                  | ZXQ-20-30-C         |
| 2 Origin                 | Bruker BioSpin GmbH |
| 3 Solvent                | CDC13               |
| 4 Temperature            | 300.0               |
| 5 Number of Scans        | 30                  |
| 6 Acquisition Time       | 1.3631              |
| 7 Acquisition Date       | 2020-04-10T10:17:51 |
| 8 Spectrometer Frequency | 100.61              |
| 9 Spectral Width         | 24038.5             |

150.17  
 144.72  
 144.13  
 142.63  
 136.05  
 134.27  
 132.73  
 129.48  
 128.12  
 126.66  
 126.59  
 125.31  
 123.36  
 121.00  
 111.43  
 108.60  
 87.71  
 86.66  
 78.68  
 77.32  
 77.00  
 76.68  
 68.58  
 43.25  
 42.70  
 40.02  
 21.55

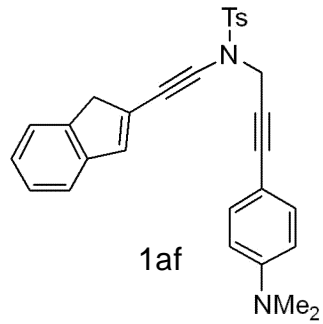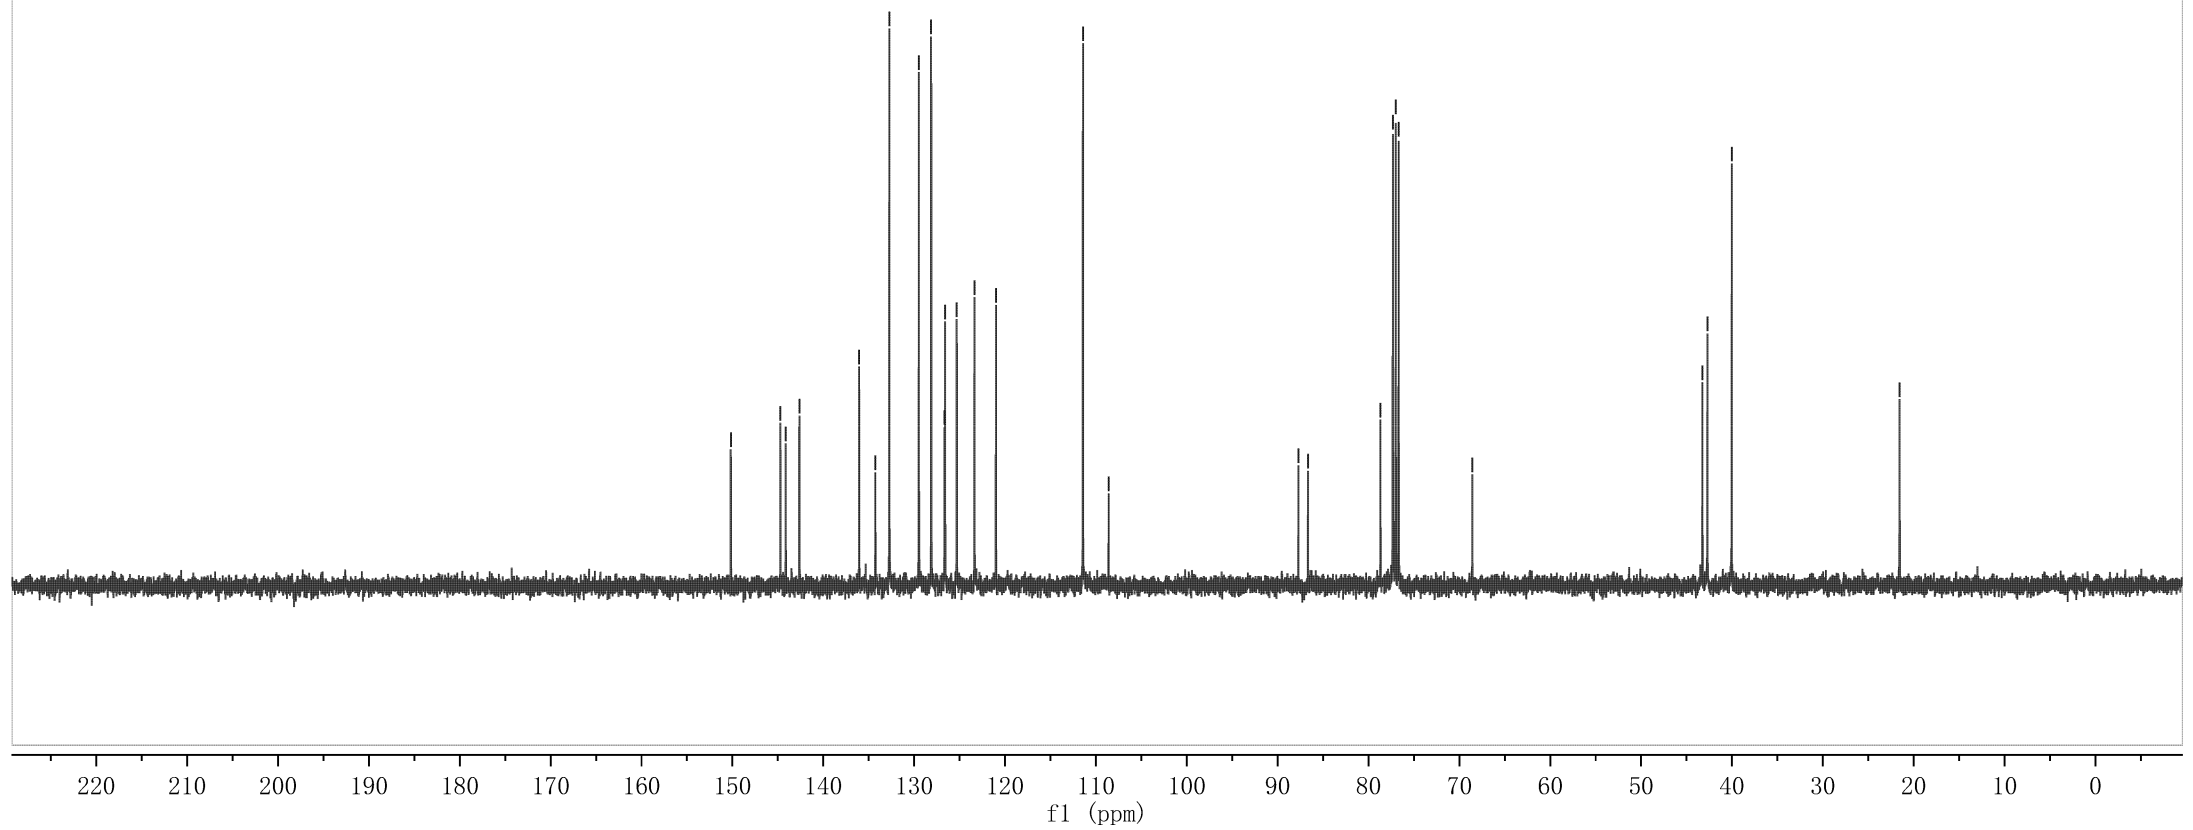

| Parameter                | Value               |
|--------------------------|---------------------|
| 1 Title                  | WHR-8-225           |
| 2 Origin                 | Bruker BioSpin GmbH |
| 3 Solvent                | CDC13               |
| 4 Temperature            | 298.0               |
| 5 Number of Scans        | 5                   |
| 6 Acquisition Time       | 4.0894              |
| 7 Acquisition Date       | 2020-07-02T16:35:47 |
| 8 Spectrometer Frequency | 400.13              |
| 9 Spectral Width         | 8012.8              |

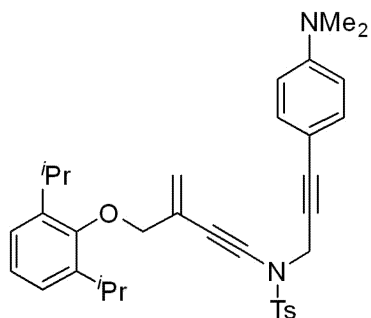

1ag

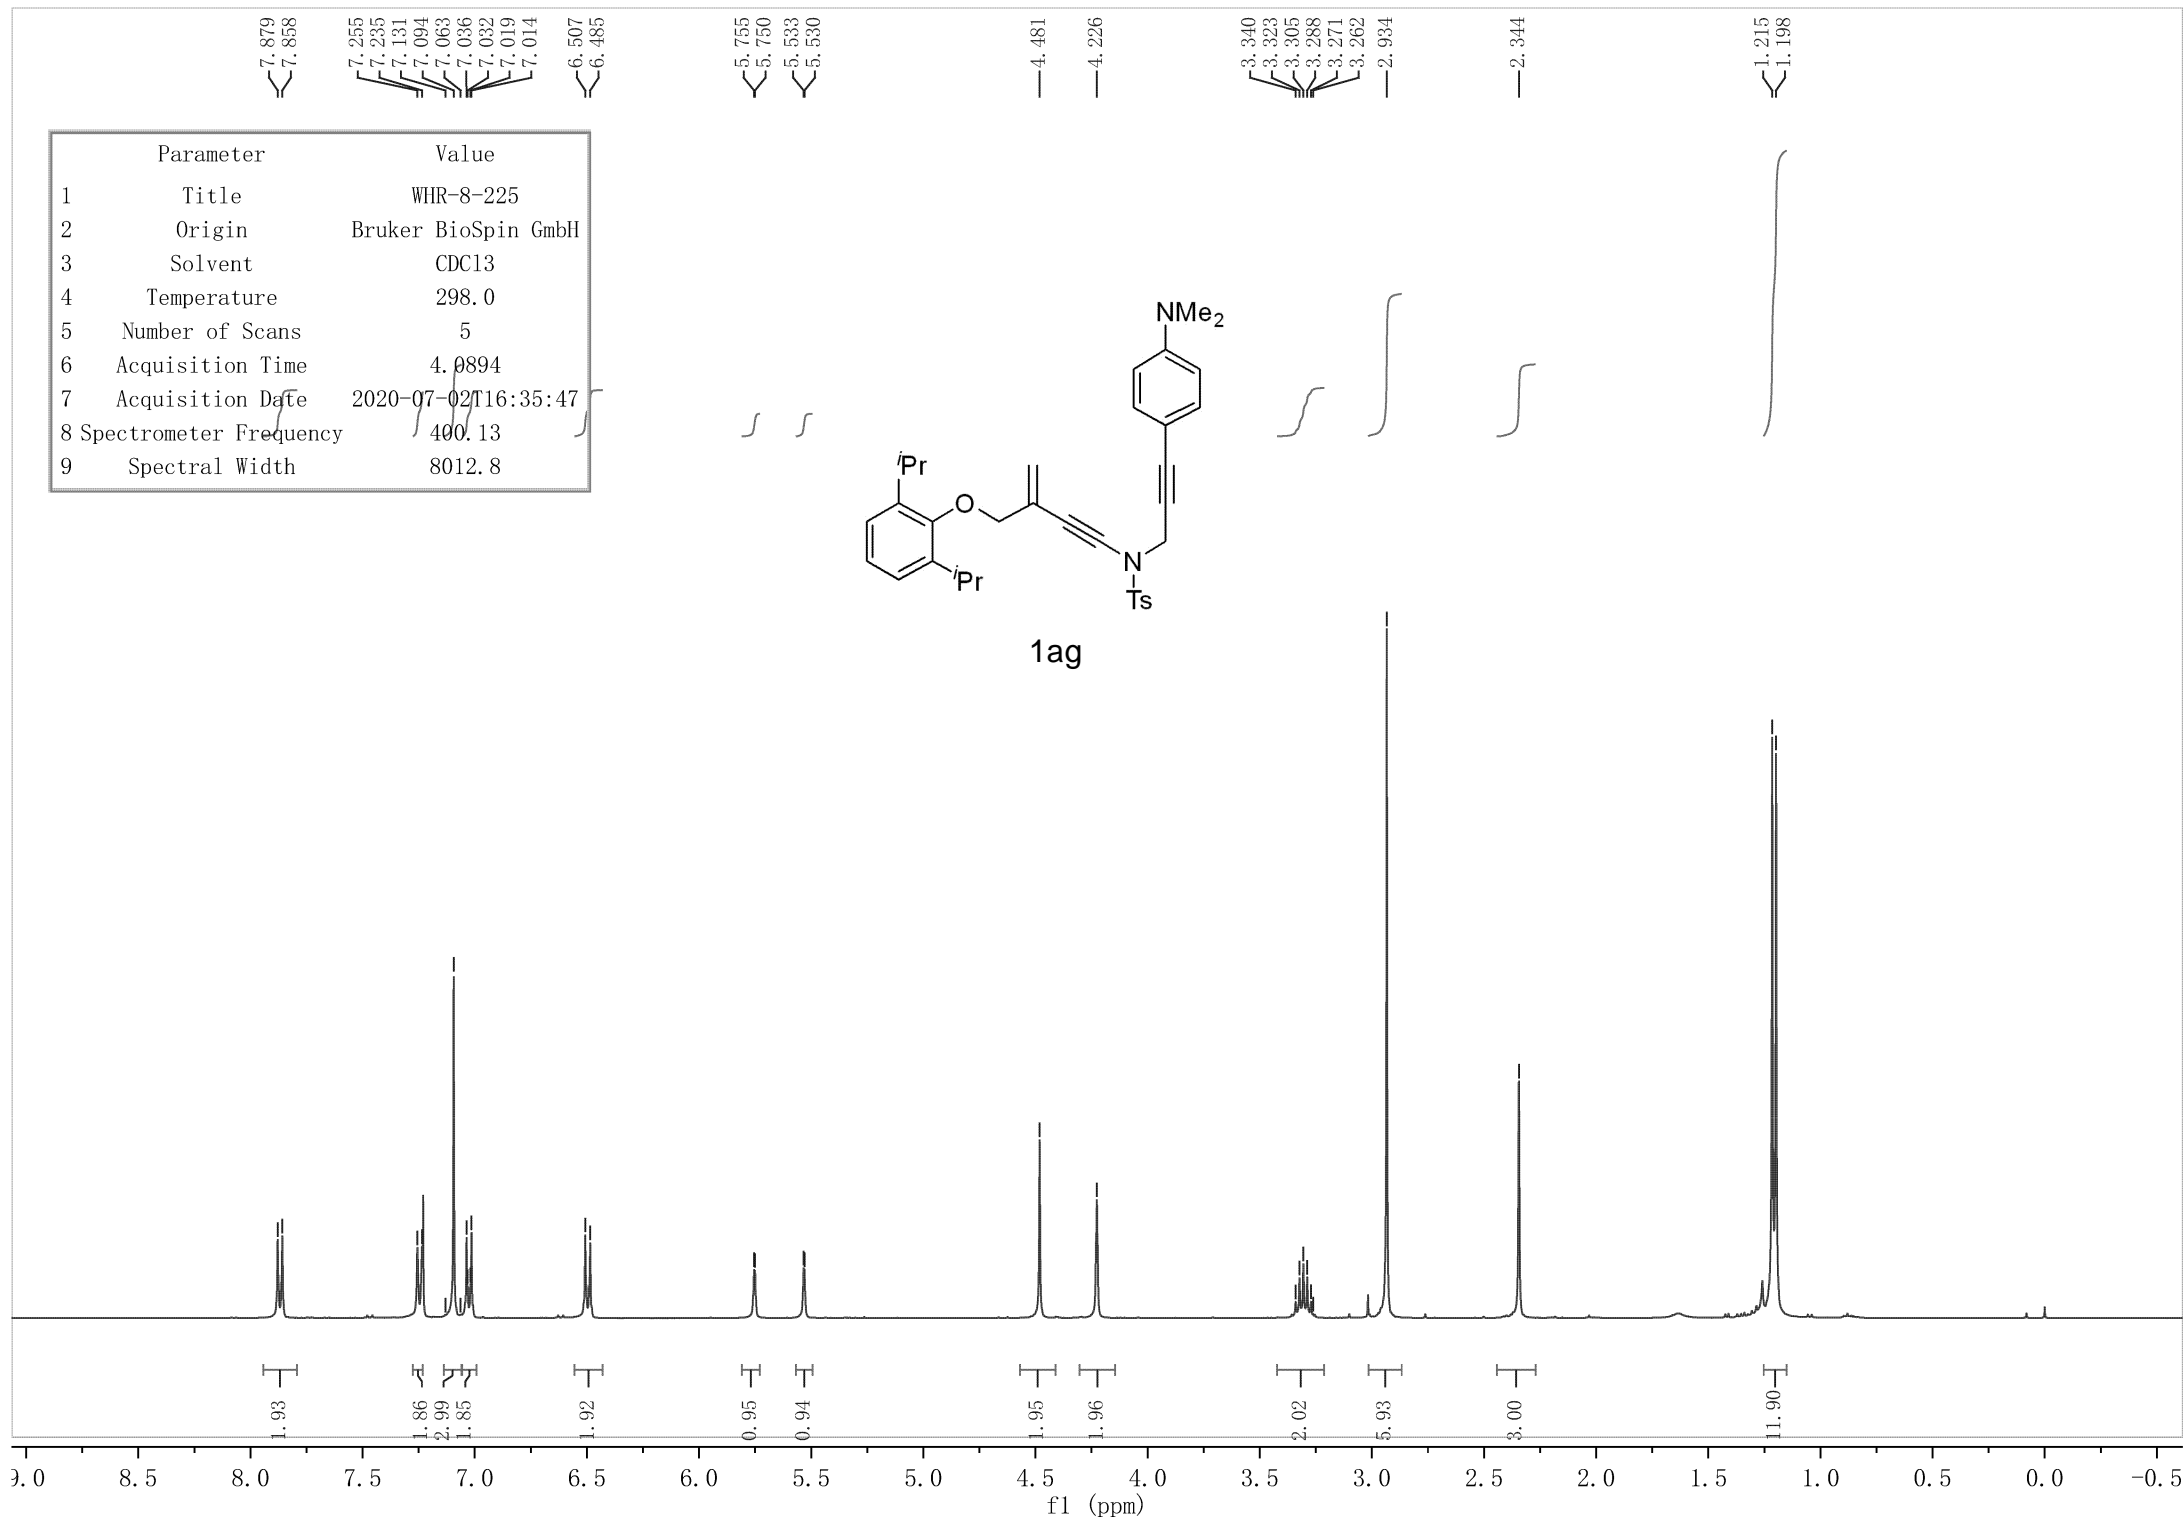



| Parameter                | Value               |
|--------------------------|---------------------|
| 1 Title                  | WHR-8-225-C         |
| 2 Origin                 | Bruker BioSpin GmbH |
| 3 Solvent                | CDC13               |
| 4 Temperature            | 300.0               |
| 5 Number of Scans        | 21                  |
| 6 Acquisition Time       | 1.3631              |
| 7 Acquisition Date       | 2020-07-02T16:36:55 |
| 8 Spectrometer Frequency | 100.61              |
| 9 Spectral Width         | 24038.5             |

- 152.80
- 150.18
- 144.71
- 141.82
- 134.28
- 132.72
- 129.48
- 128.14
- 127.07
- 124.70
- 123.93
- 120.12
- 111.43
- 108.57
- 87.71
- 83.25
- 78.55
- 77.32
- 77.00
- 76.68
- 75.50
- 69.29
- 43.14
- 40.06
- 26.38
- 24.02
- 21.54

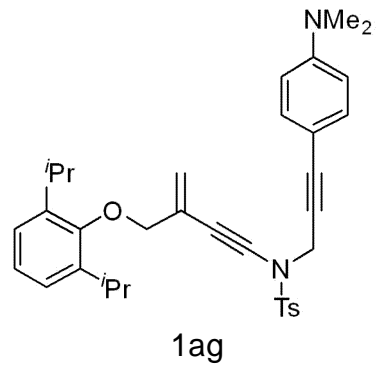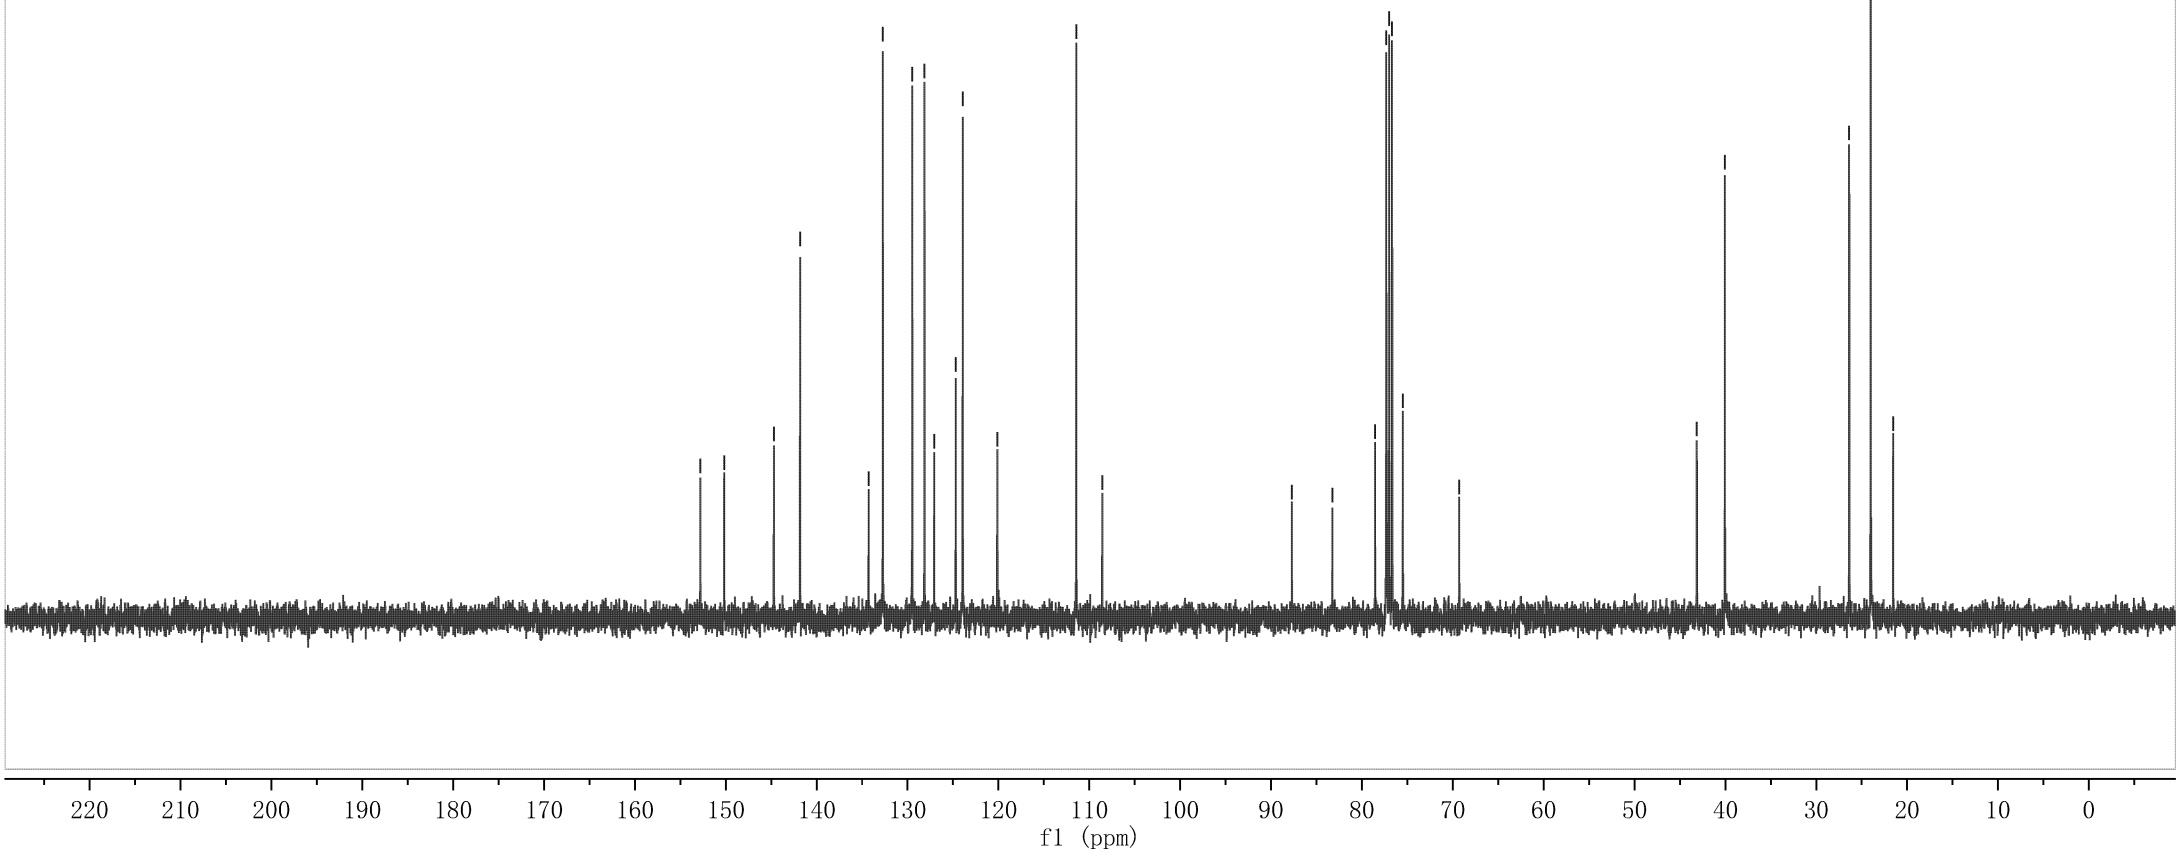

| Parameter                | Value               |
|--------------------------|---------------------|
| 1 Title                  | ZXQ-20-187          |
| 2 Origin                 | Bruker BioSpin GmbH |
| 3 Solvent                | CDC13               |
| 4 Temperature            | 297.4               |
| 5 Number of Scans        | 16                  |
| 6 Acquisition Time       | 3.9846              |
| 7 Acquisition Date       | 2020-05-15T17:05:31 |
| 8 Spectrometer Frequency | 400.03              |
| 9 Spectral Width         | 8223.7              |

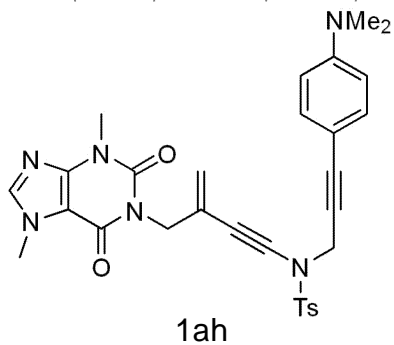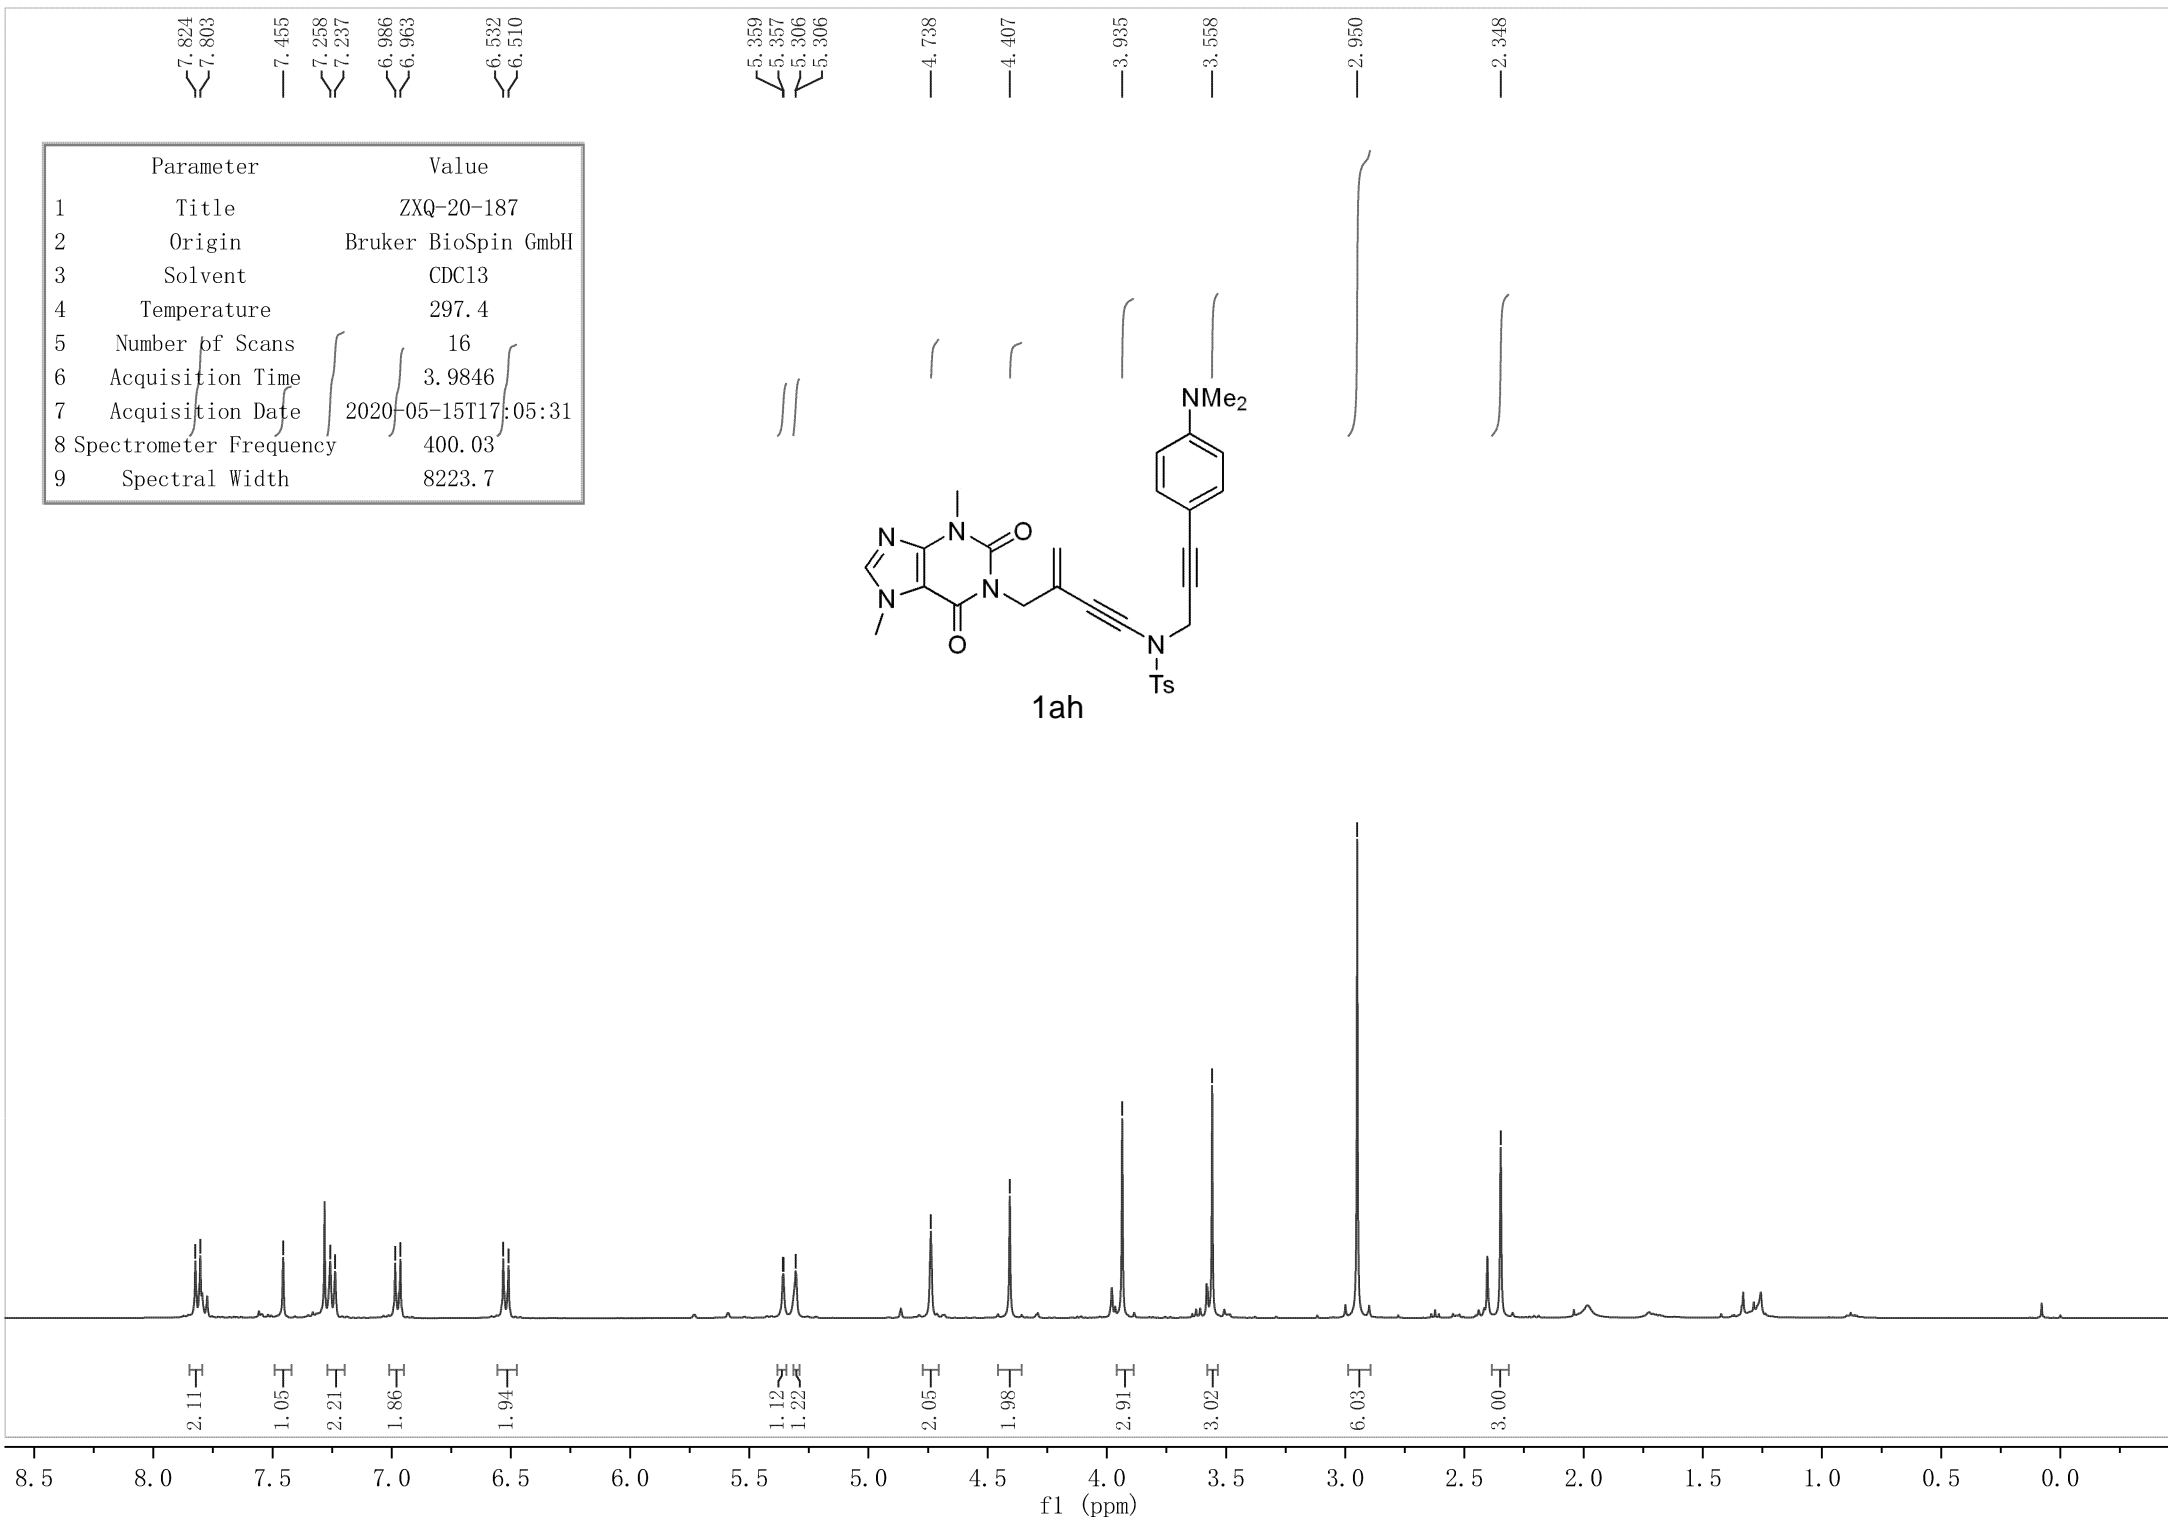

| Parameter                | Value               |
|--------------------------|---------------------|
| 1 Title                  | ZXQ-20-187-C        |
| 2 Origin                 | Bruker BioSpin GmbH |
| 3 Solvent                | CDC13               |
| 4 Temperature            | 297.8               |
| 5 Number of Scans        | 48                  |
| 6 Acquisition Time       | 1.3631              |
| 7 Acquisition Date       | 2020-05-15T17:08:39 |
| 8 Spectrometer Frequency | 100.59              |
| 9 Spectral Width         | 24038.5             |

154.80 151.24 150.09 148.79 144.57 141.52 134.35 132.64 129.47 128.03 126.24 119.28 111.36 108.53 107.57 87.42 83.52 78.48 77.32 77.00 76.68 69.27

44.63 43.02 40.05 33.49 29.64 21.51

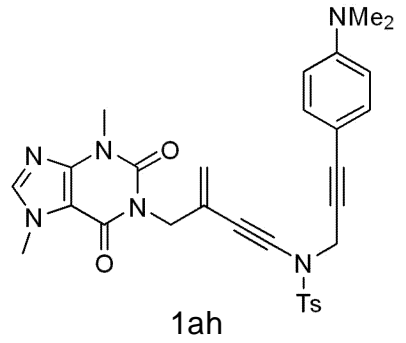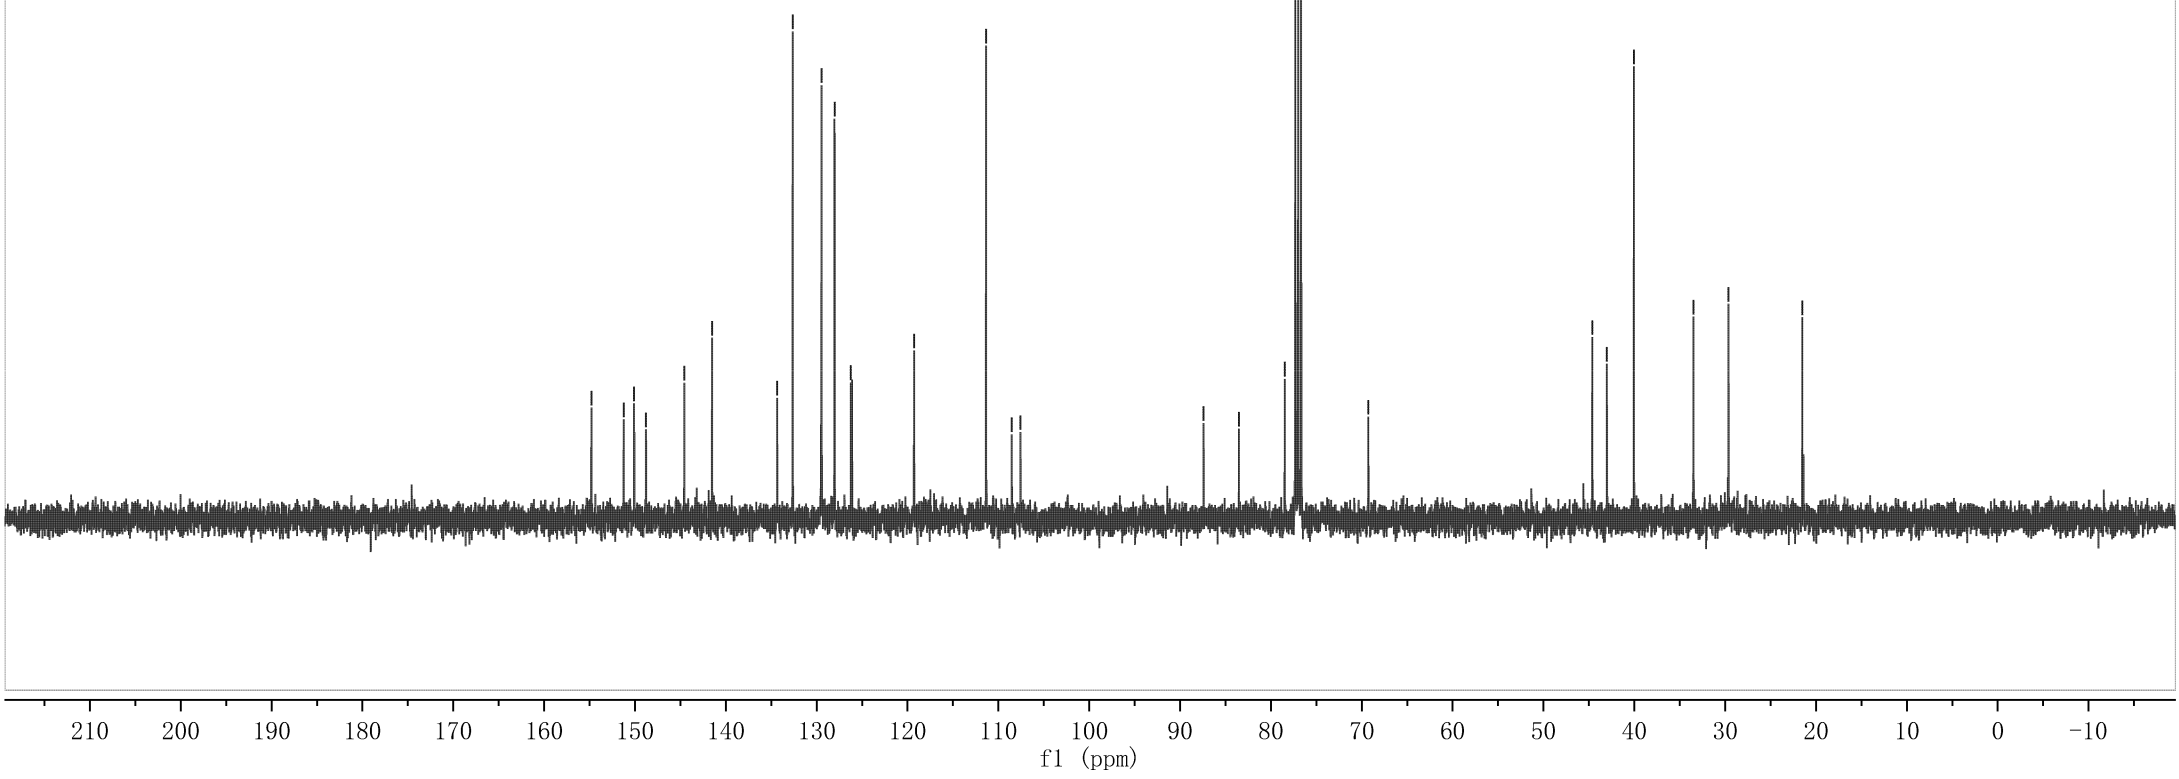

| Parameter                | Value               |
|--------------------------|---------------------|
| 1 Title                  | ZXQ-19-155          |
| 2 Origin                 | Bruker BioSpin GmbH |
| 3 Solvent                | CDCl <sub>3</sub>   |
| 4 Temperature            | 298.0               |
| 5 Number of Scans        | 9                   |
| 6 Acquisition Time       | 4.0894              |
| 7 Acquisition Date       | 2019-12-21 16:03:02 |
| 8 Spectrometer Frequency | 400.13              |
| 9 Spectral Width         | 8012.8              |

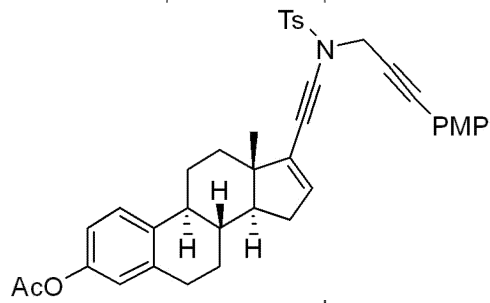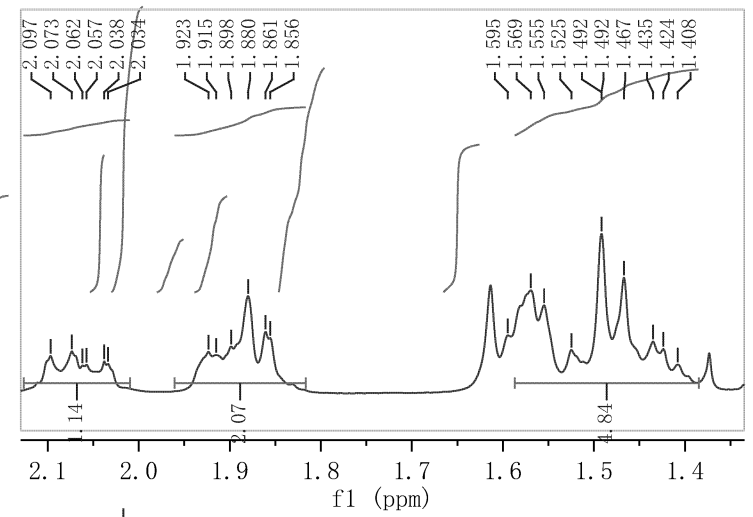

7.892  
7.871

7.295  
7.275  
7.251  
7.233  
7.212  
7.107  
7.085

6.849  
6.844  
6.828  
6.823  
6.787  
6.765

5.963  
5.963  
5.959

4.542  
4.497  
4.489  
4.445

3.789

2.904  
2.878  
2.865

2.378  
2.301  
2.276  
2.253  
2.228  
2.223

1.898  
1.880  
1.861  
1.856

1.595  
1.569  
1.555  
1.525

1.492  
1.467  
1.435  
1.424  
1.408

2.02

2.12  
1.04  
2.02

4.00

1.00

2.01

3.15

2.08

2.96  
6.16  
1.14  
2.07

4.84

3.18

8.5 8.0 7.5 7.0 6.5 6.0 5.5 5.0 4.5 4.0 3.5 3.0 2.5 2.0 1.5 1.0 0.5 0.0 -0.5

f1 (ppm)

| Parameter                | Value               |
|--------------------------|---------------------|
| 1 Title                  | ZXQ-19-155-C        |
| 2 Origin                 | Bruker BioSpin GmbH |
| 3 Solvent                | CDC13               |
| 4 Temperature            | 300.0               |
| 5 Number of Scans        | 66                  |
| 6 Acquisition Time       | 1.3631              |
| 7 Acquisition Date       | 2019-12-21T16:04:41 |
| 8 Spectrometer Frequency | 100.61              |
| 9 Spectral Width         | 24038.5             |

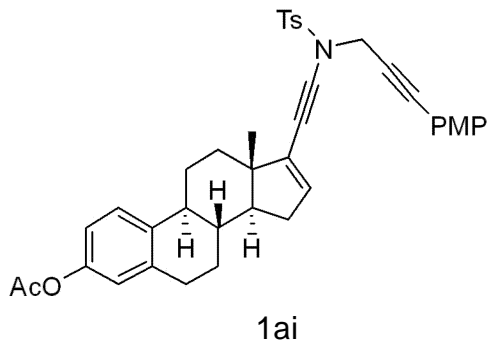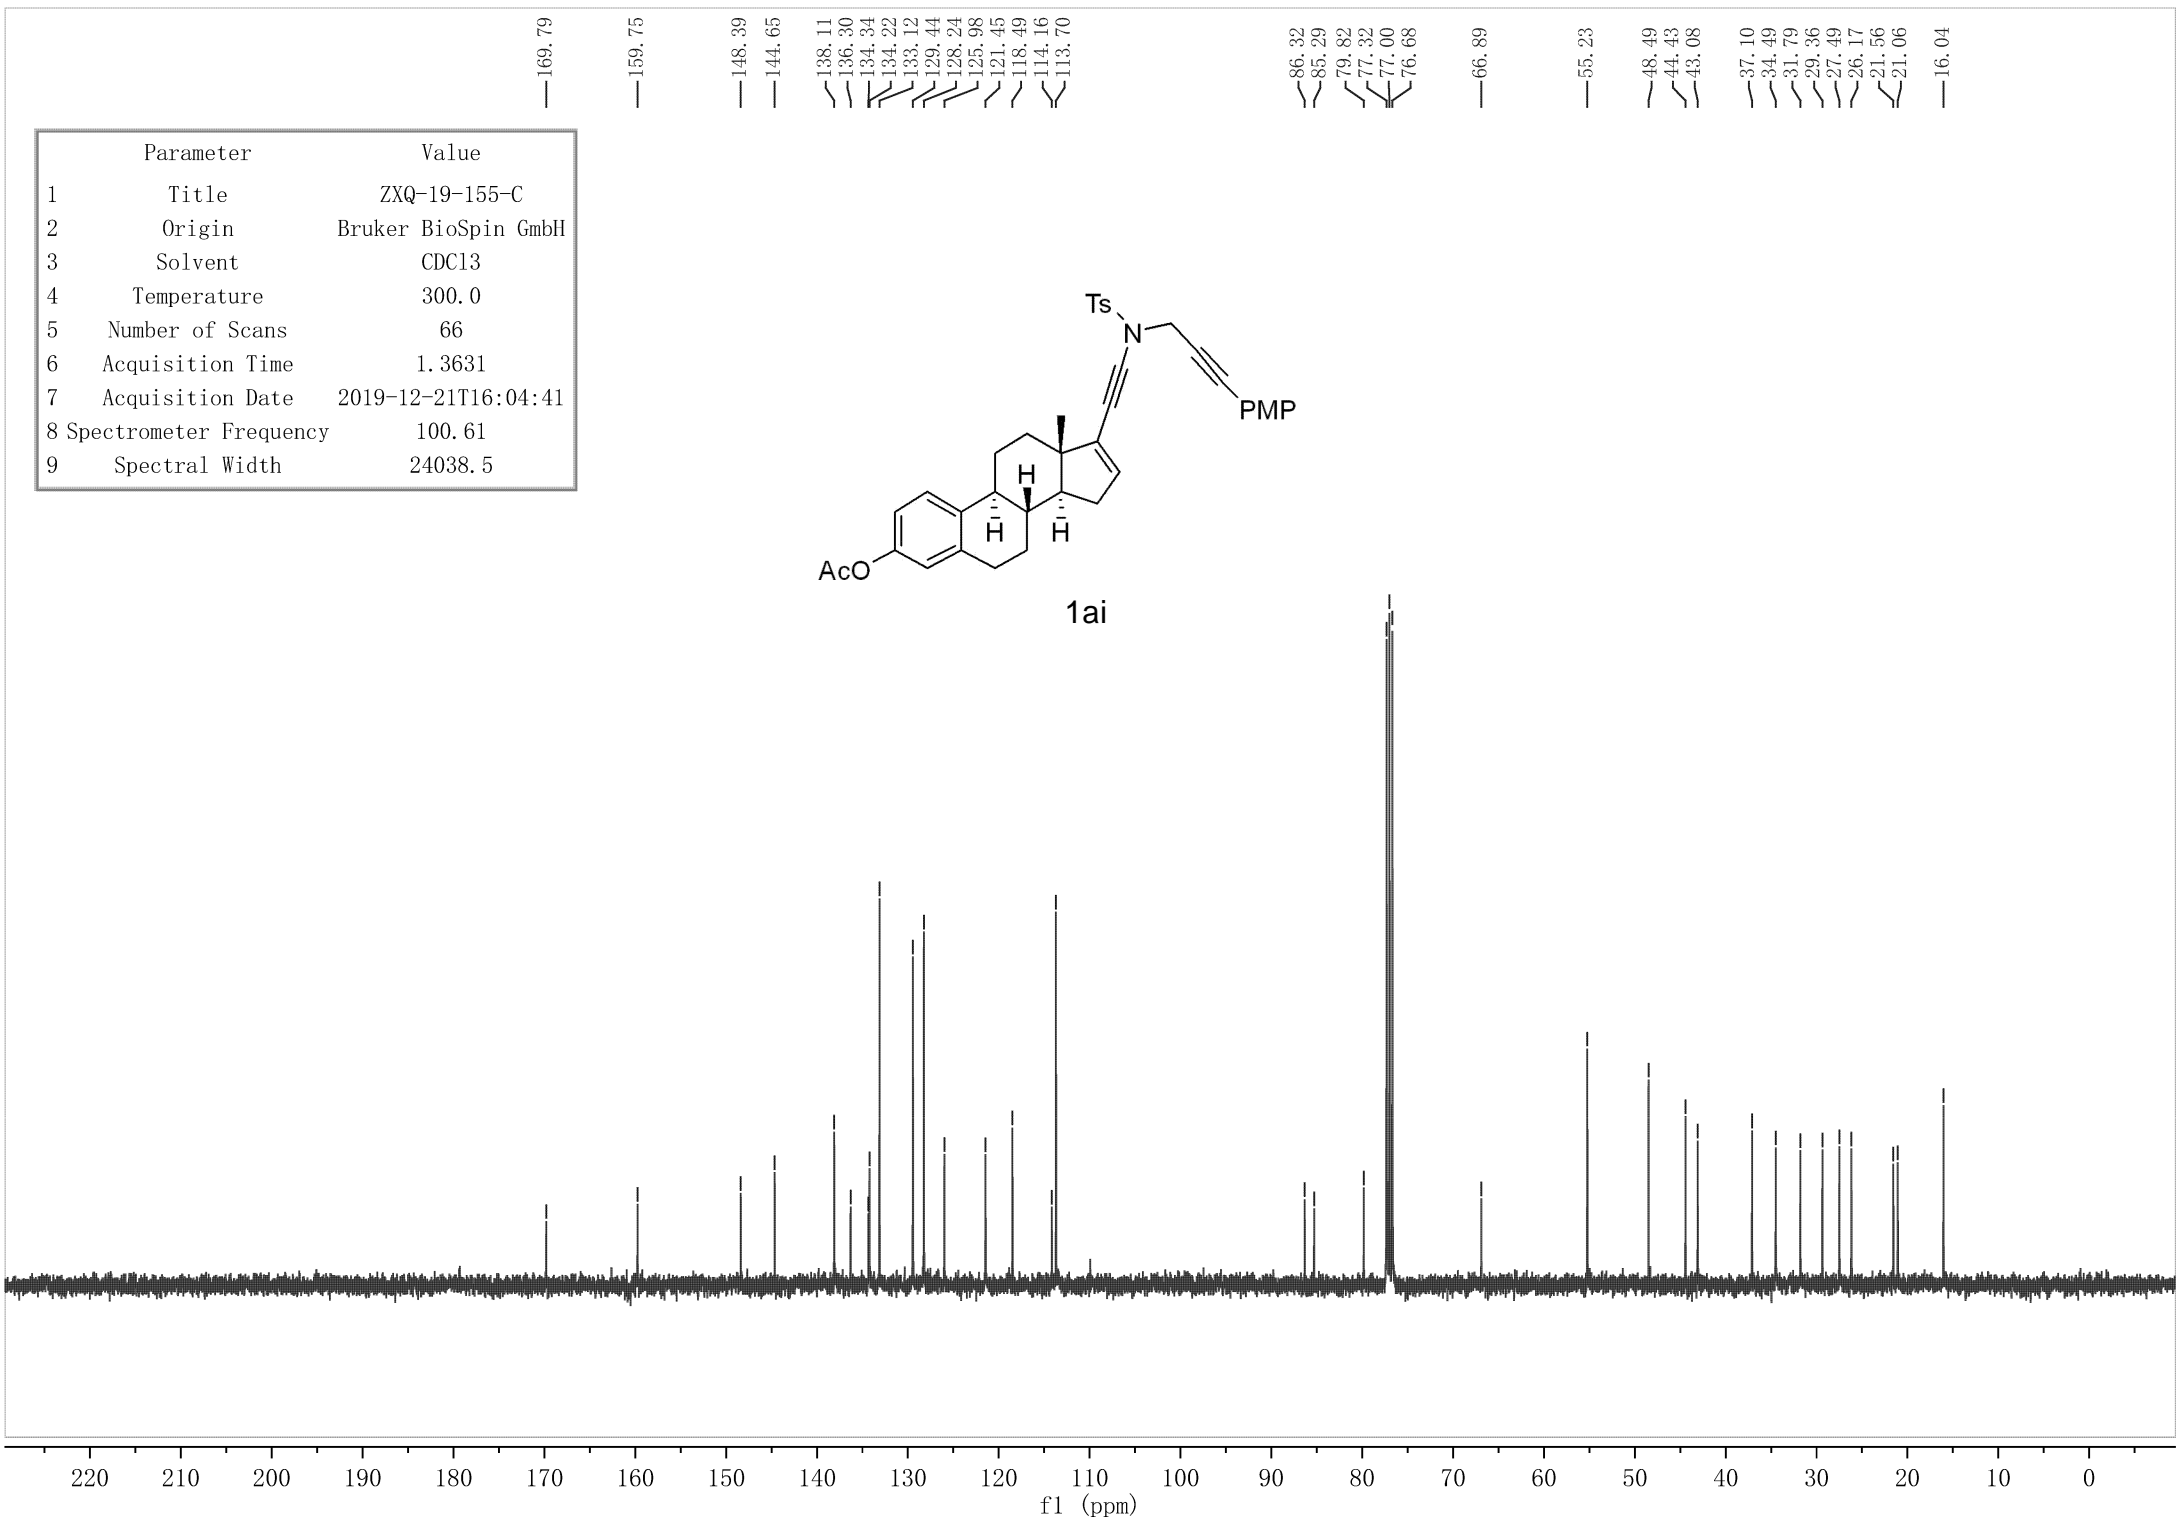

| Parameter                | Value               |
|--------------------------|---------------------|
| 1 Title                  | ZXQ-19-155-C-DEPT   |
| 2 Origin                 | Bruker BioSpin GmbH |
| 3 Solvent                | CDC13               |
| 4 Temperature            | 300.0               |
| 5 Number of Scans        | 14                  |
| 6 Acquisition Time       | 1.3631              |
| 7 Acquisition Date       | 2019-12-21T16:09:17 |
| 8 Spectrometer Frequency | 100.61              |
| 9 Spectral Width         | 24038.5             |

134.22  
133.12  
129.45  
128.24  
125.98  
121.45  
118.49  
113.70

55.23  
44.43  
43.08  
37.11  
34.50  
31.79  
29.36  
27.50  
26.17  
21.56  
21.07  
16.04

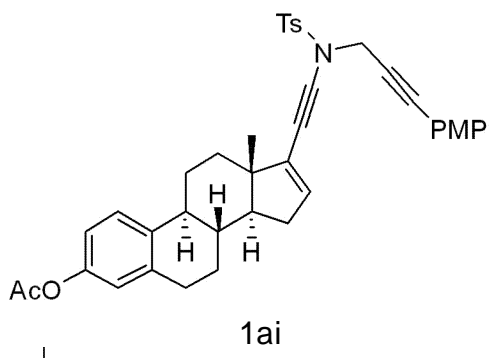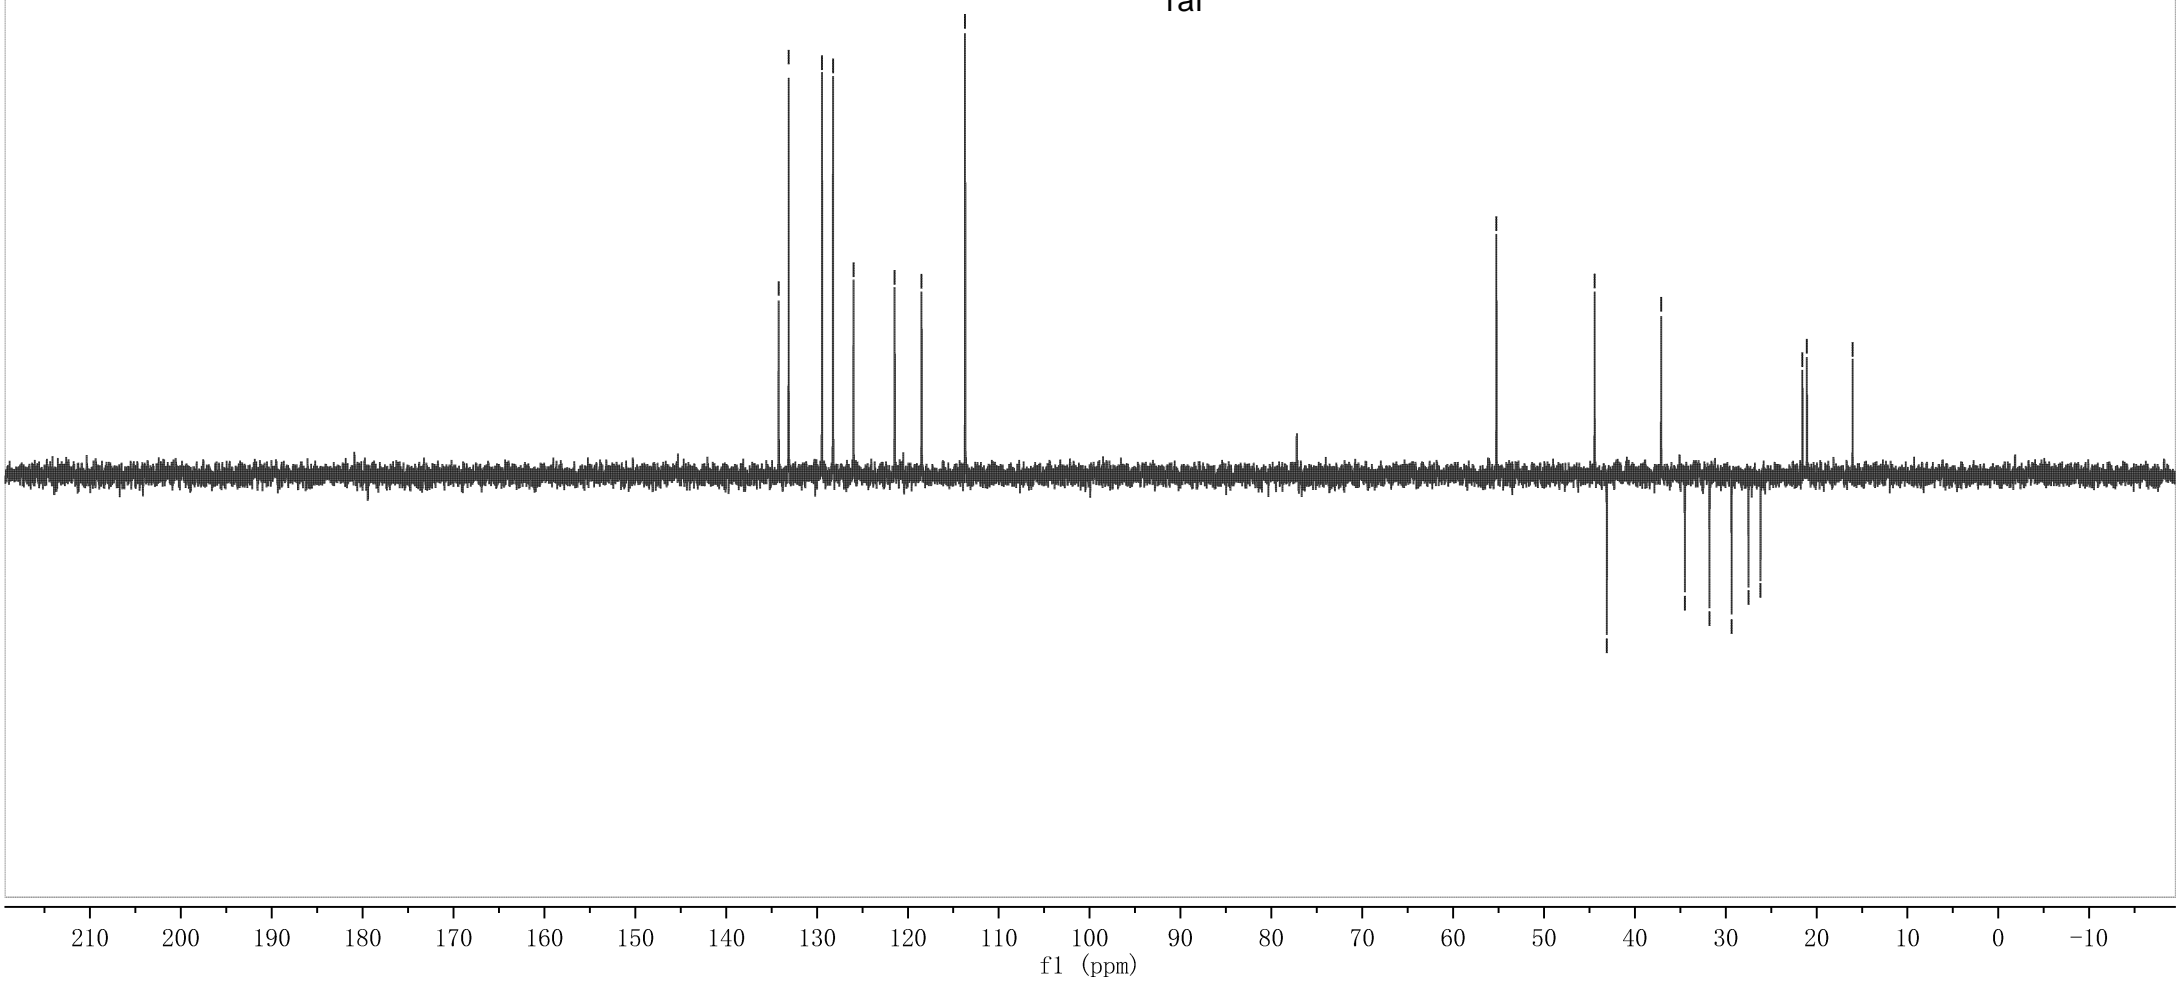

| Parameter                | Value               |
|--------------------------|---------------------|
| 1 Title                  | ZXQ-20-48           |
| 2 Origin                 | Bruker BioSpin GmbH |
| 3 Solvent                | CDCl3               |
| 4 Temperature            | 298.3               |
| 5 Number of Scans        | 10                  |
| 6 Acquisition Time       | 3.9846              |
| 7 Acquisition Date       | 2020-04-16T21:28:16 |
| 8 Spectrometer Frequency | 400.03              |
| 9 Spectral Width         | 8223.7              |

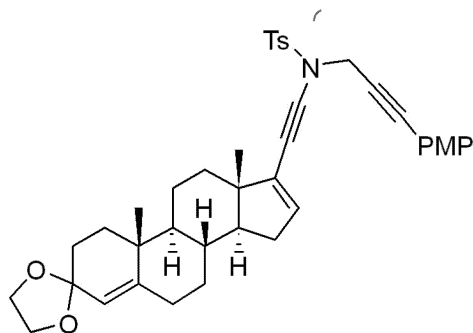

1aj

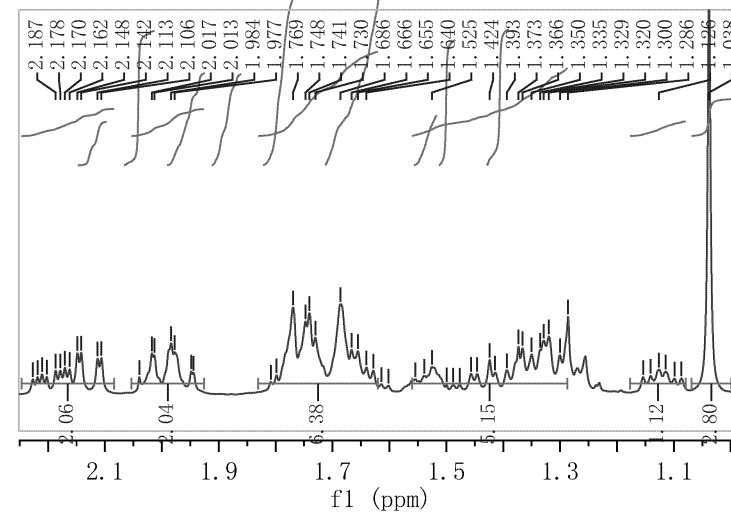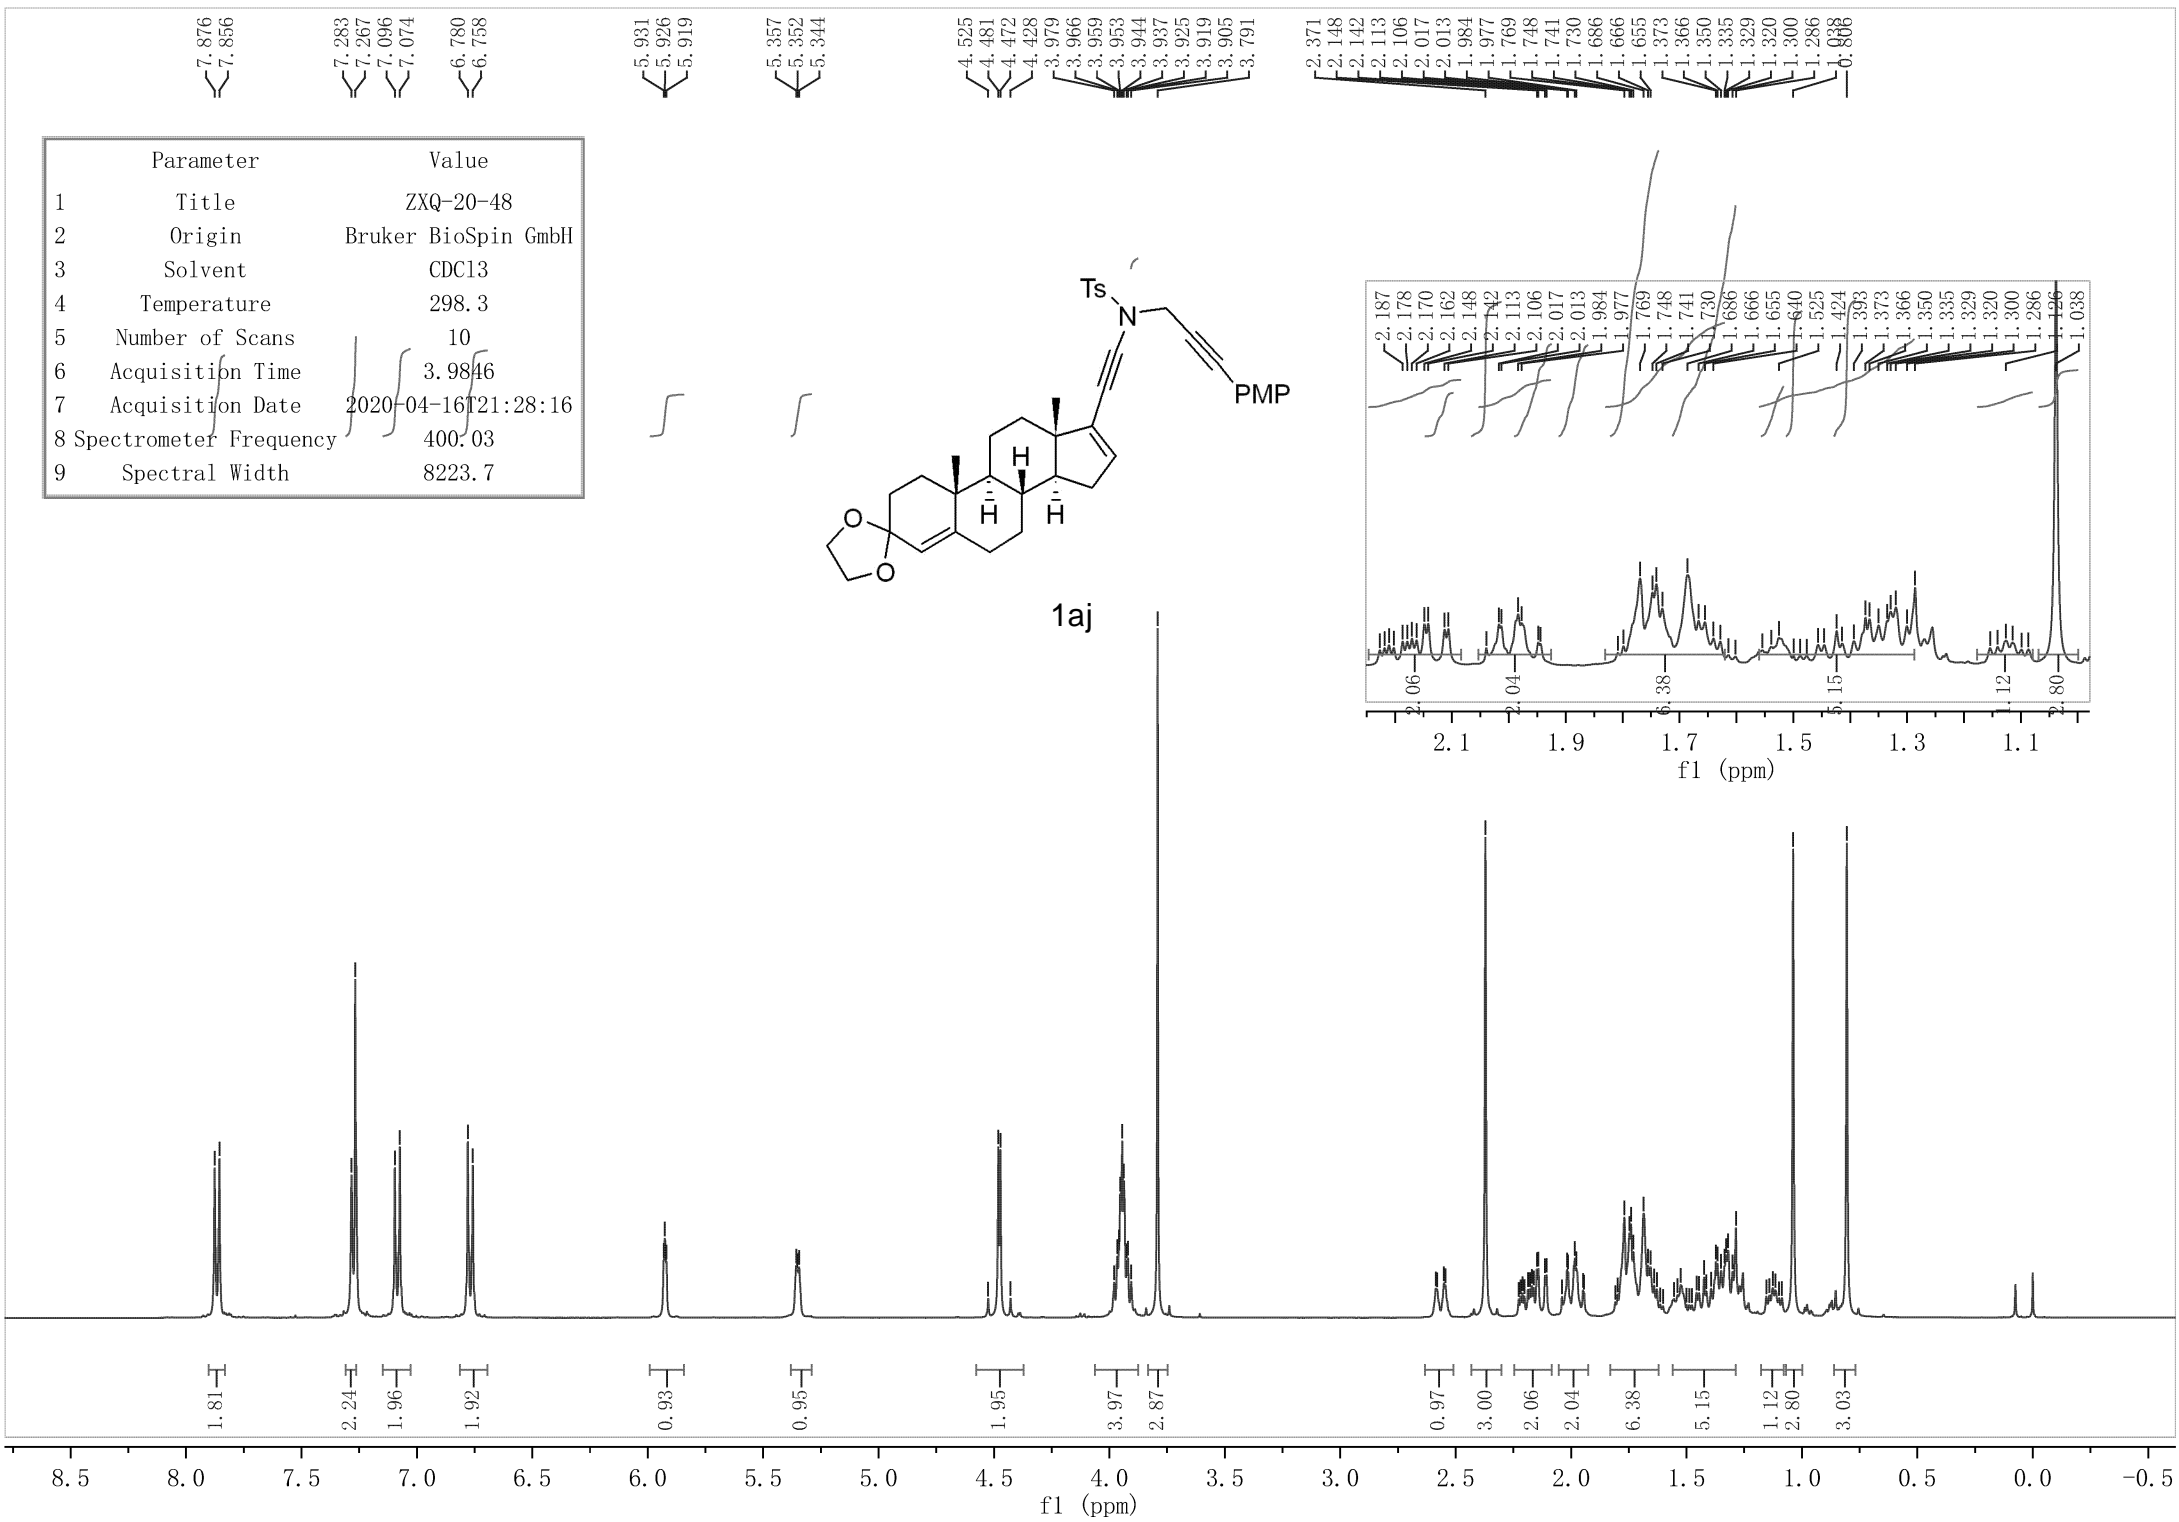

| Parameter                | Value               |
|--------------------------|---------------------|
| 1 Title                  | ZXQ-20-48-C         |
| 2 Origin                 | Bruker BioSpin GmbH |
| 3 Solvent                | CDC13               |
| 4 Temperature            | 298.5               |
| 5 Number of Scans        | 38                  |
| 6 Acquisition Time       | 1.3631              |
| 7 Acquisition Date       | 2020-04-16T21:31:23 |
| 8 Spectrometer Frequency | 100.59              |
| 9 Spectral Width         | 24038.5             |

- 144.59
- 140.43
- 136.15
- 134.40
- 134.28
- 133.10
- 129.40
- 128.20
- 121.73
- 114.15
- 113.64
- 109.32
- 86.26
- 85.15
- 79.81
- 77.32
- 77.00
- 76.68
- 66.94
- 64.35
- 64.16
- 56.01
- 55.20
- 50.12
- 48.16
- 43.05
- 41.72
- 36.76
- 36.18
- 32.07
- 31.32
- 30.98
- 29.64
- 29.53
- 20.60
- 18.71
- 15.82

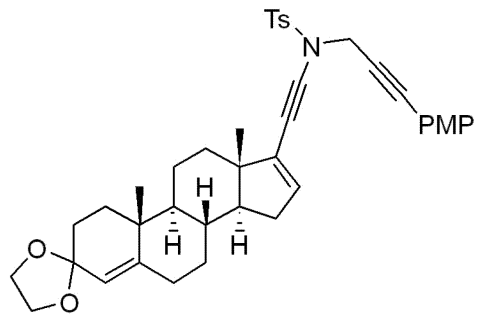

1aj

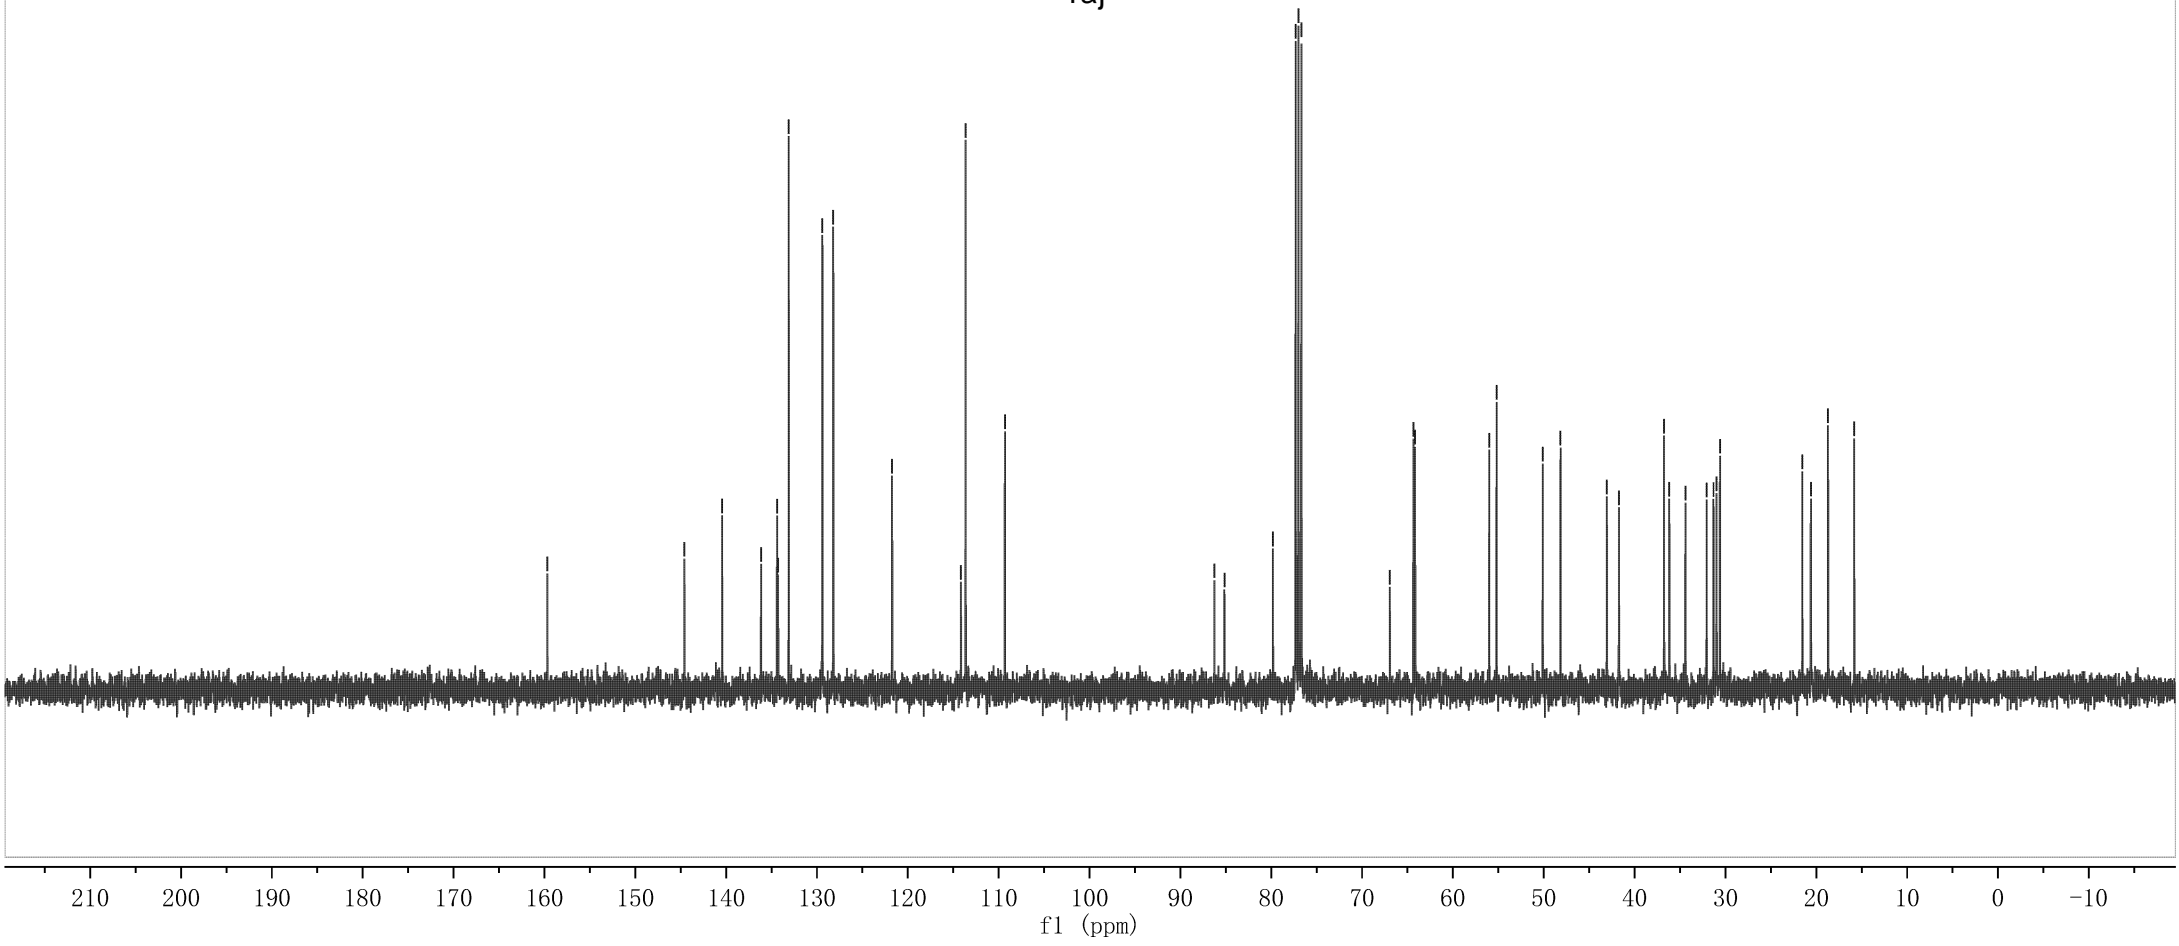



| Parameter                | Value               |
|--------------------------|---------------------|
| 1 Title                  | ZXQ-20-48-C-DEPT    |
| 2 Origin                 | Bruker BioSpin GmbH |
| 3 Solvent                | CDC13               |
| 4 Temperature            | 298.8               |
| 5 Number of Scans        | 16                  |
| 6 Acquisition Time       | 1.3631              |
| 7 Acquisition Date       | 2020-04-16T21:33:58 |
| 8 Spectrometer Frequency | 100.59              |
| 9 Spectral Width         | 24038.5             |

134.39  
 133.10  
 129.40  
 128.20  
 121.73  
 113.63  
 64.35  
 64.16  
 56.00  
 55.20  
 50.12  
 43.05  
 41.72  
 36.18  
 34.41  
 32.07  
 31.31  
 30.98  
 30.61  
 21.53  
 20.60  
 18.71  
 15.82

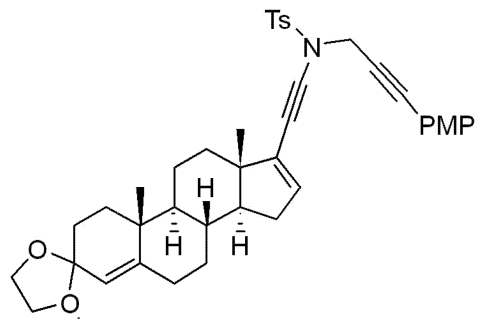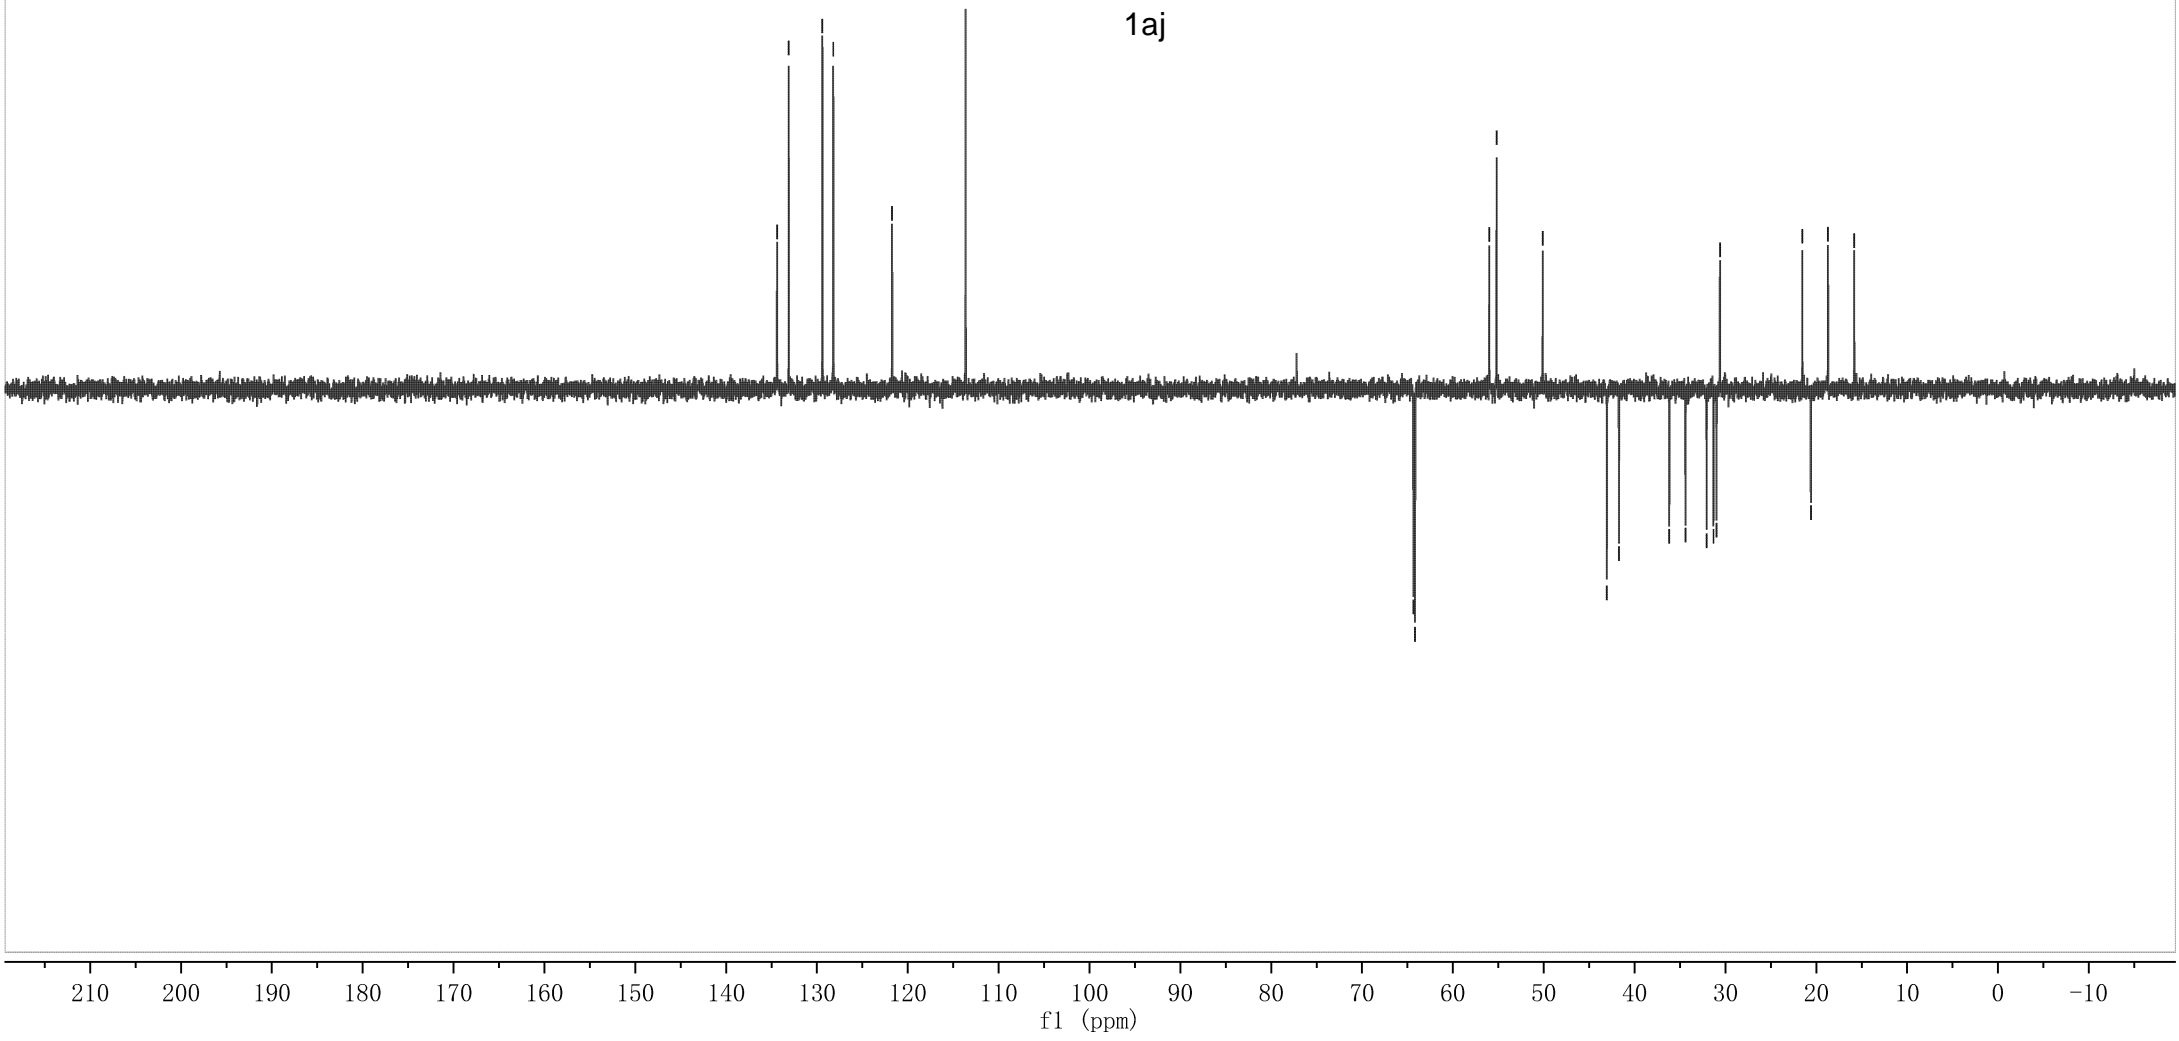

7.897  
7.876  
7.803  
7.282  
7.277  
7.075  
7.068  
7.063  
7.051  
7.046  
7.039  
6.557  
6.535  
5.484  
5.480  
5.400  
5.396  
5.313  
5.308  
5.300  
4.484  
4.446  
4.428  
4.409  
4.007  
3.478  
3.467  
3.413  
3.386  
3.359  
3.359  
3.214  
3.203  
3.192  
2.391  
2.373  
2.368  
2.351  
2.346  
2.339  
2.335  
2.217  
2.017  
2.003  
1.999  
1.985  
1.969  
1.955  
1.899  
1.882  
1.864  
1.823  
1.815  
1.805  
1.798  
1.781  
1.777  
1.760  
1.726  
1.717  
1.694  
1.682  
1.653  
1.639  
1.624  
1.613  
1.597  
1.587  
1.558  
1.521  
1.514  
1.508  
1.487  
1.473  
1.461  
1.455  
1.439  
1.429  
1.387  
1.349  
1.336  
1.320  
1.299  
1.286  
1.272  
1.256  
1.177  
1.164  
1.133  
1.119  
1.105  
1.098  
1.092  
1.084  
1.023  
1.003  
0.995  
0.978  
0.809  
0.795  
0.795

| Parameter                | Value               |
|--------------------------|---------------------|
| 1 Title                  | ZXQ-20-138          |
| 2 Origin                 | Bruker BioSpin GmbH |
| 3 Solvent                | CDC13               |
| 4 Temperature            | 299.8               |
| 5 Number of Scans        | 11                  |
| 6 Acquisition Time       | 3.9846              |
| 7 Acquisition Date       | 2020-05-06T13:50:11 |
| 8 Spectrometer Frequency | 400.03              |
| 9 Spectral Width         | 8223.7              |

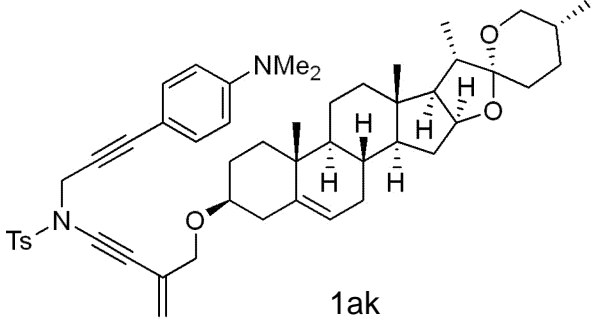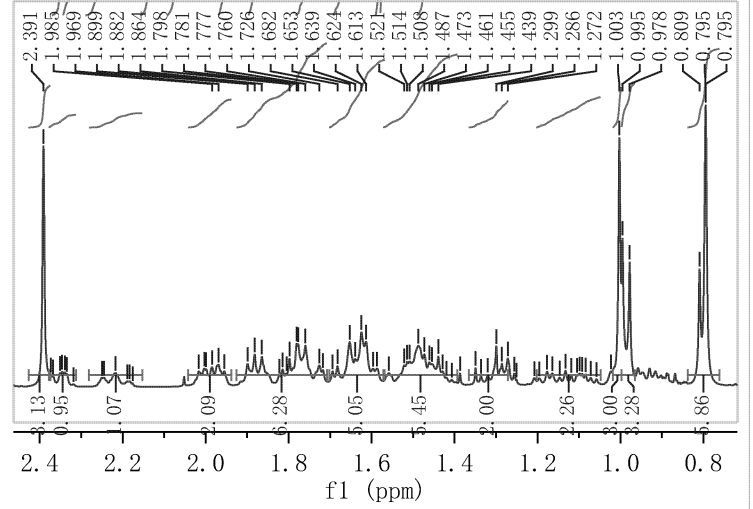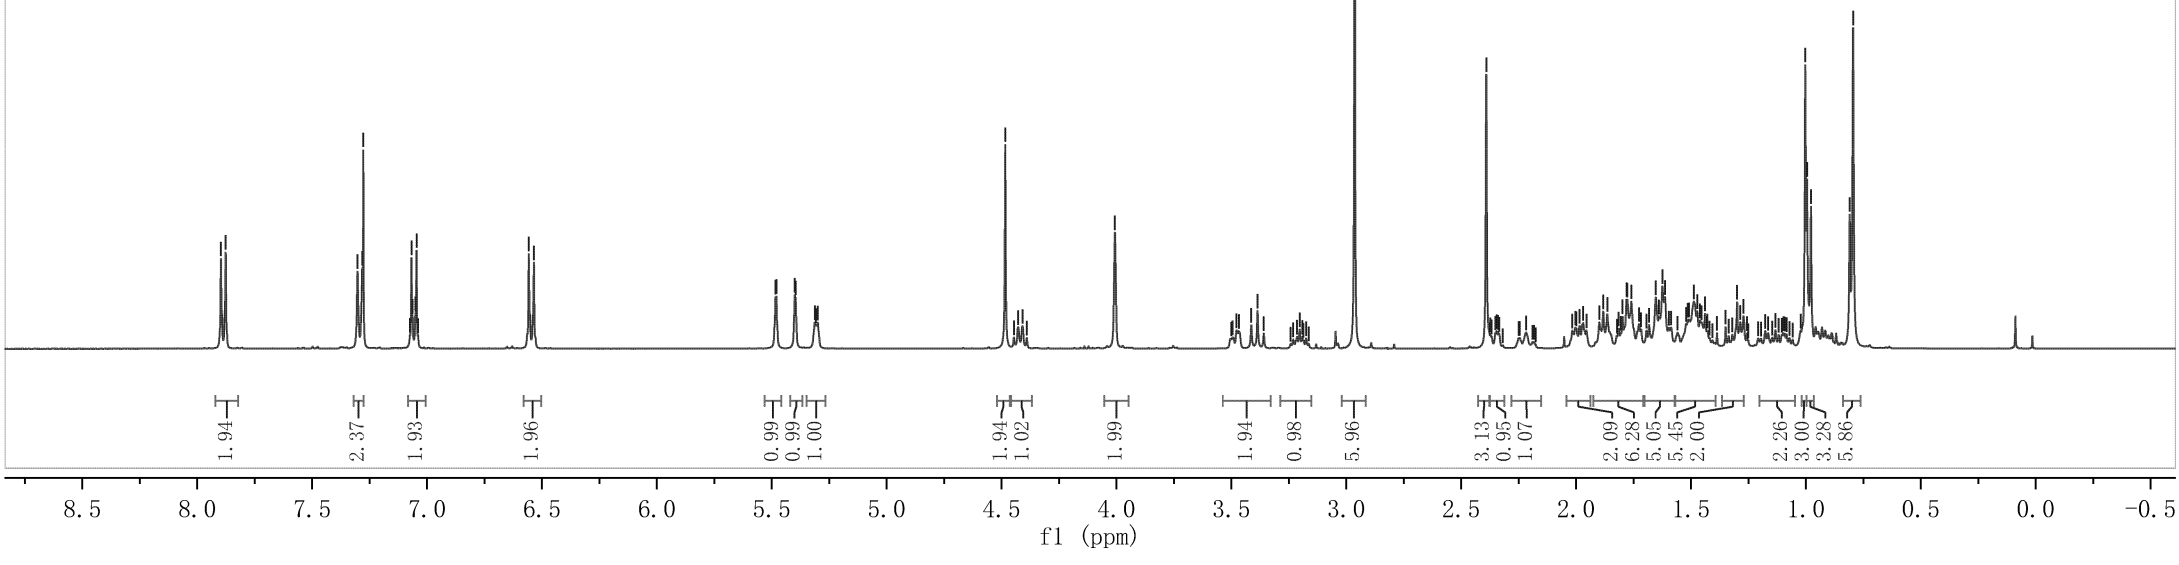

| Parameter                | Value               |
|--------------------------|---------------------|
| 1 Title                  | ZXQ-20-138-C        |
| 2 Origin                 | Bruker BioSpin GmbH |
| 3 Solvent                | CDC13               |
| 4 Temperature            | 300.1               |
| 5 Number of Scans        | 34                  |
| 6 Acquisition Time       | 1.3631              |
| 7 Acquisition Date       | 2020-05-06T13:53:22 |
| 8 Spectrometer Frequency | 100.59              |
| 9 Spectral Width         | 24038.5             |

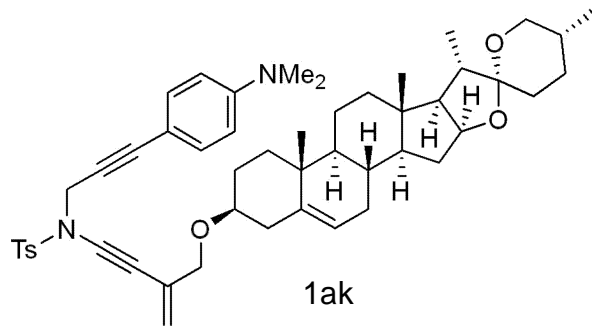

150.15 144.61 140.81 134.34 132.76 129.46 128.48 128.18 121.23 119.62 111.43 109.20 108.71 87.63 83.02 80.75 78.67 78.63 77.32 77.00 76.68 69.95 66.78 62.08 56.47 50.04 43.11 41.55 40.20 40.07 39.00 36.90 31.37 31.34 30.58 21.58 20.78 19.31 17.08 16.21 14.47

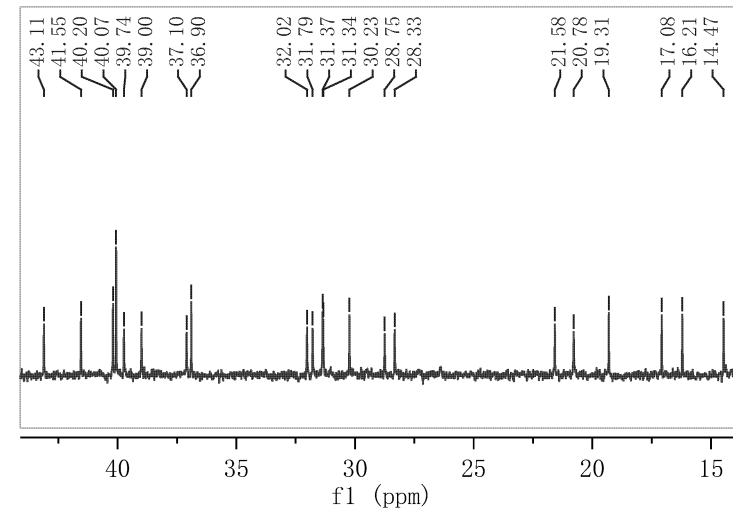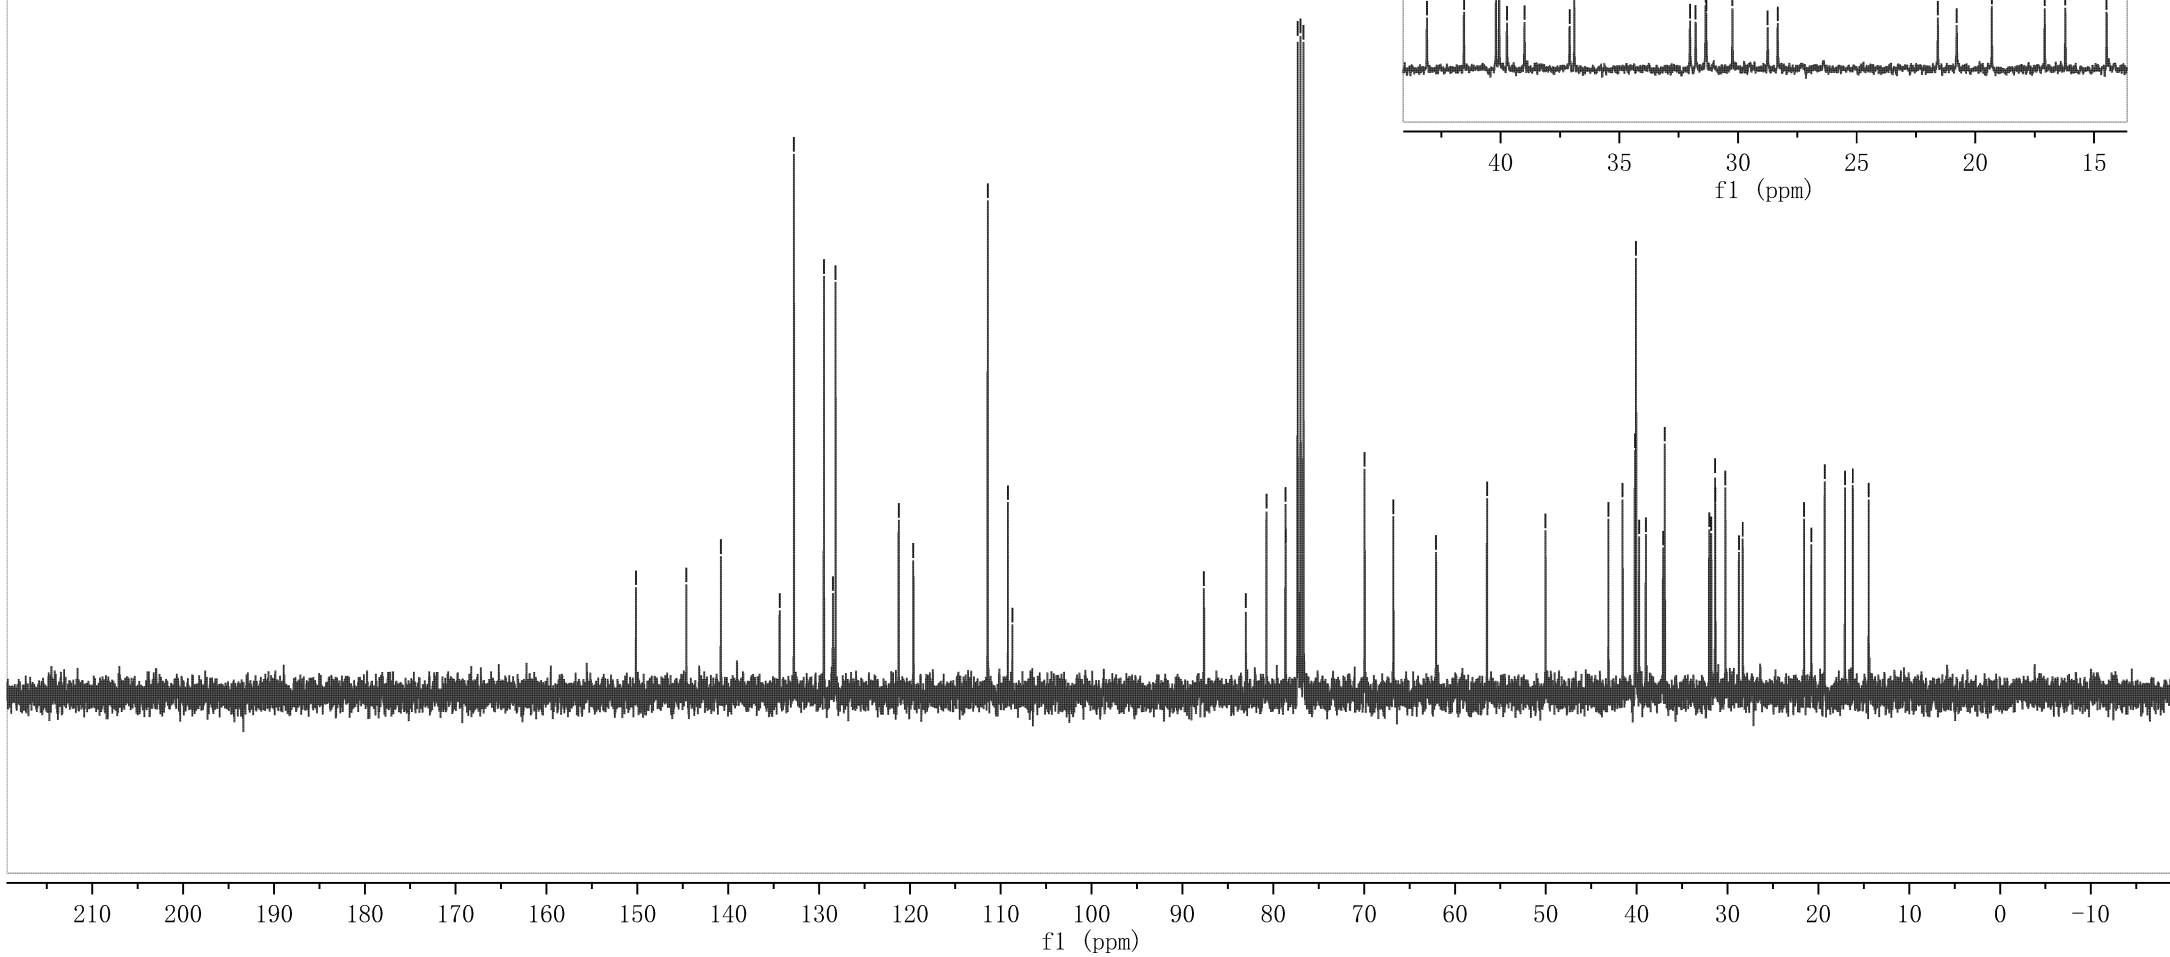

| Parameter                | Value               |
|--------------------------|---------------------|
| 1 Title                  | ZXQ-20-138-C-DEPT   |
| 2 Origin                 | Bruker BioSpin GmbH |
| 3 Solvent                | CDC13               |
| 4 Temperature            | 300.6               |
| 5 Number of Scans        | 18                  |
| 6 Acquisition Time       | 1.3631              |
| 7 Acquisition Date       | 2020-05-06T13:55:42 |
| 8 Spectrometer Frequency | 100.59              |
| 9 Spectral Width         | 24038.5             |

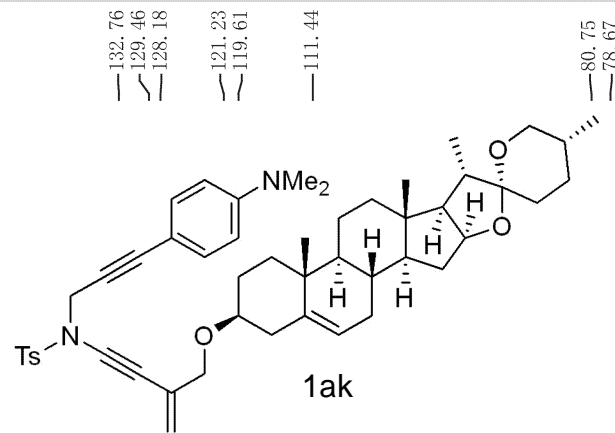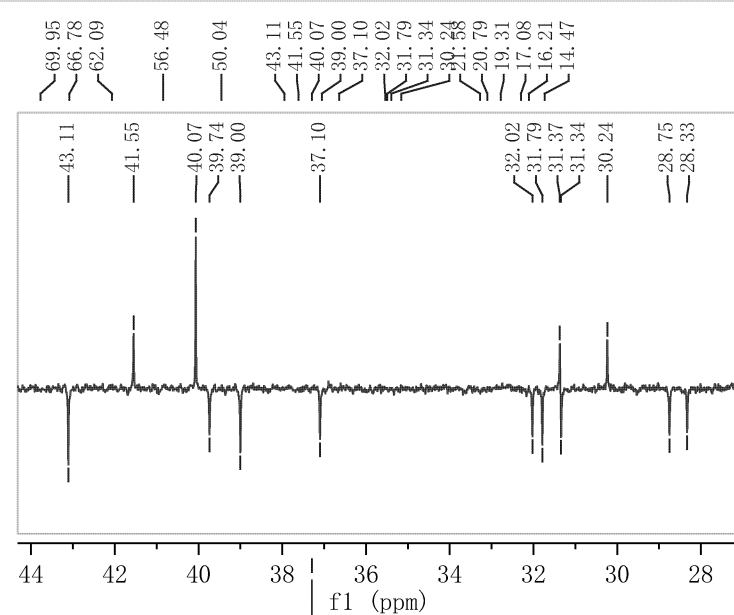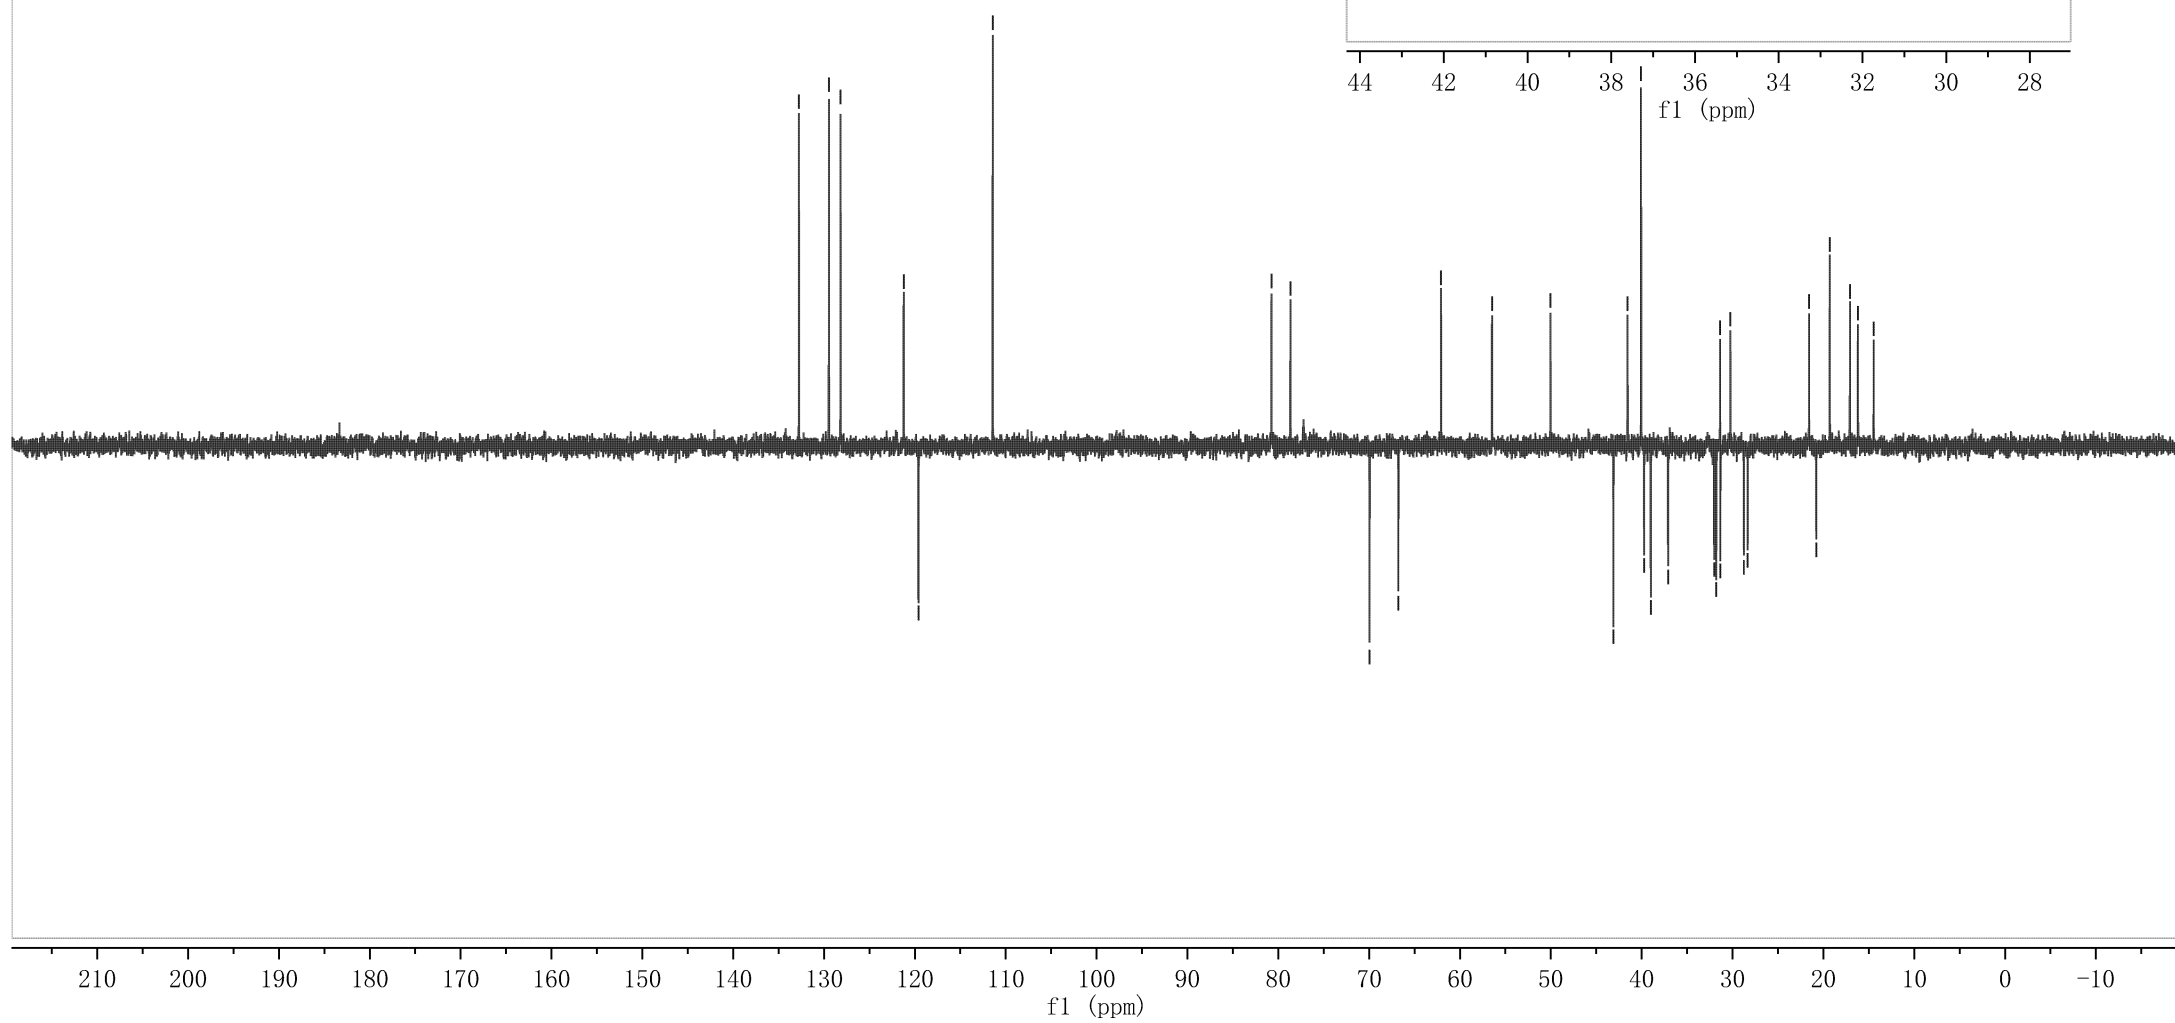

| Parameter                | Value               |
|--------------------------|---------------------|
| 1 Title                  | ZXQ-19-178-XIJI     |
| 2 Origin                 | Bruker BioSpin GmbH |
| 3 Solvent                | CDC13               |
| 4 Temperature            | 298.0               |
| 5 Number of Scans        | 4                   |
| 6 Acquisition Time       | 4.0894              |
| 7 Acquisition Date       | 2019-12-27T22:26:24 |
| 8 Spectrometer Frequency | 400.13              |
| 9 Spectral Width         | 8012.8              |

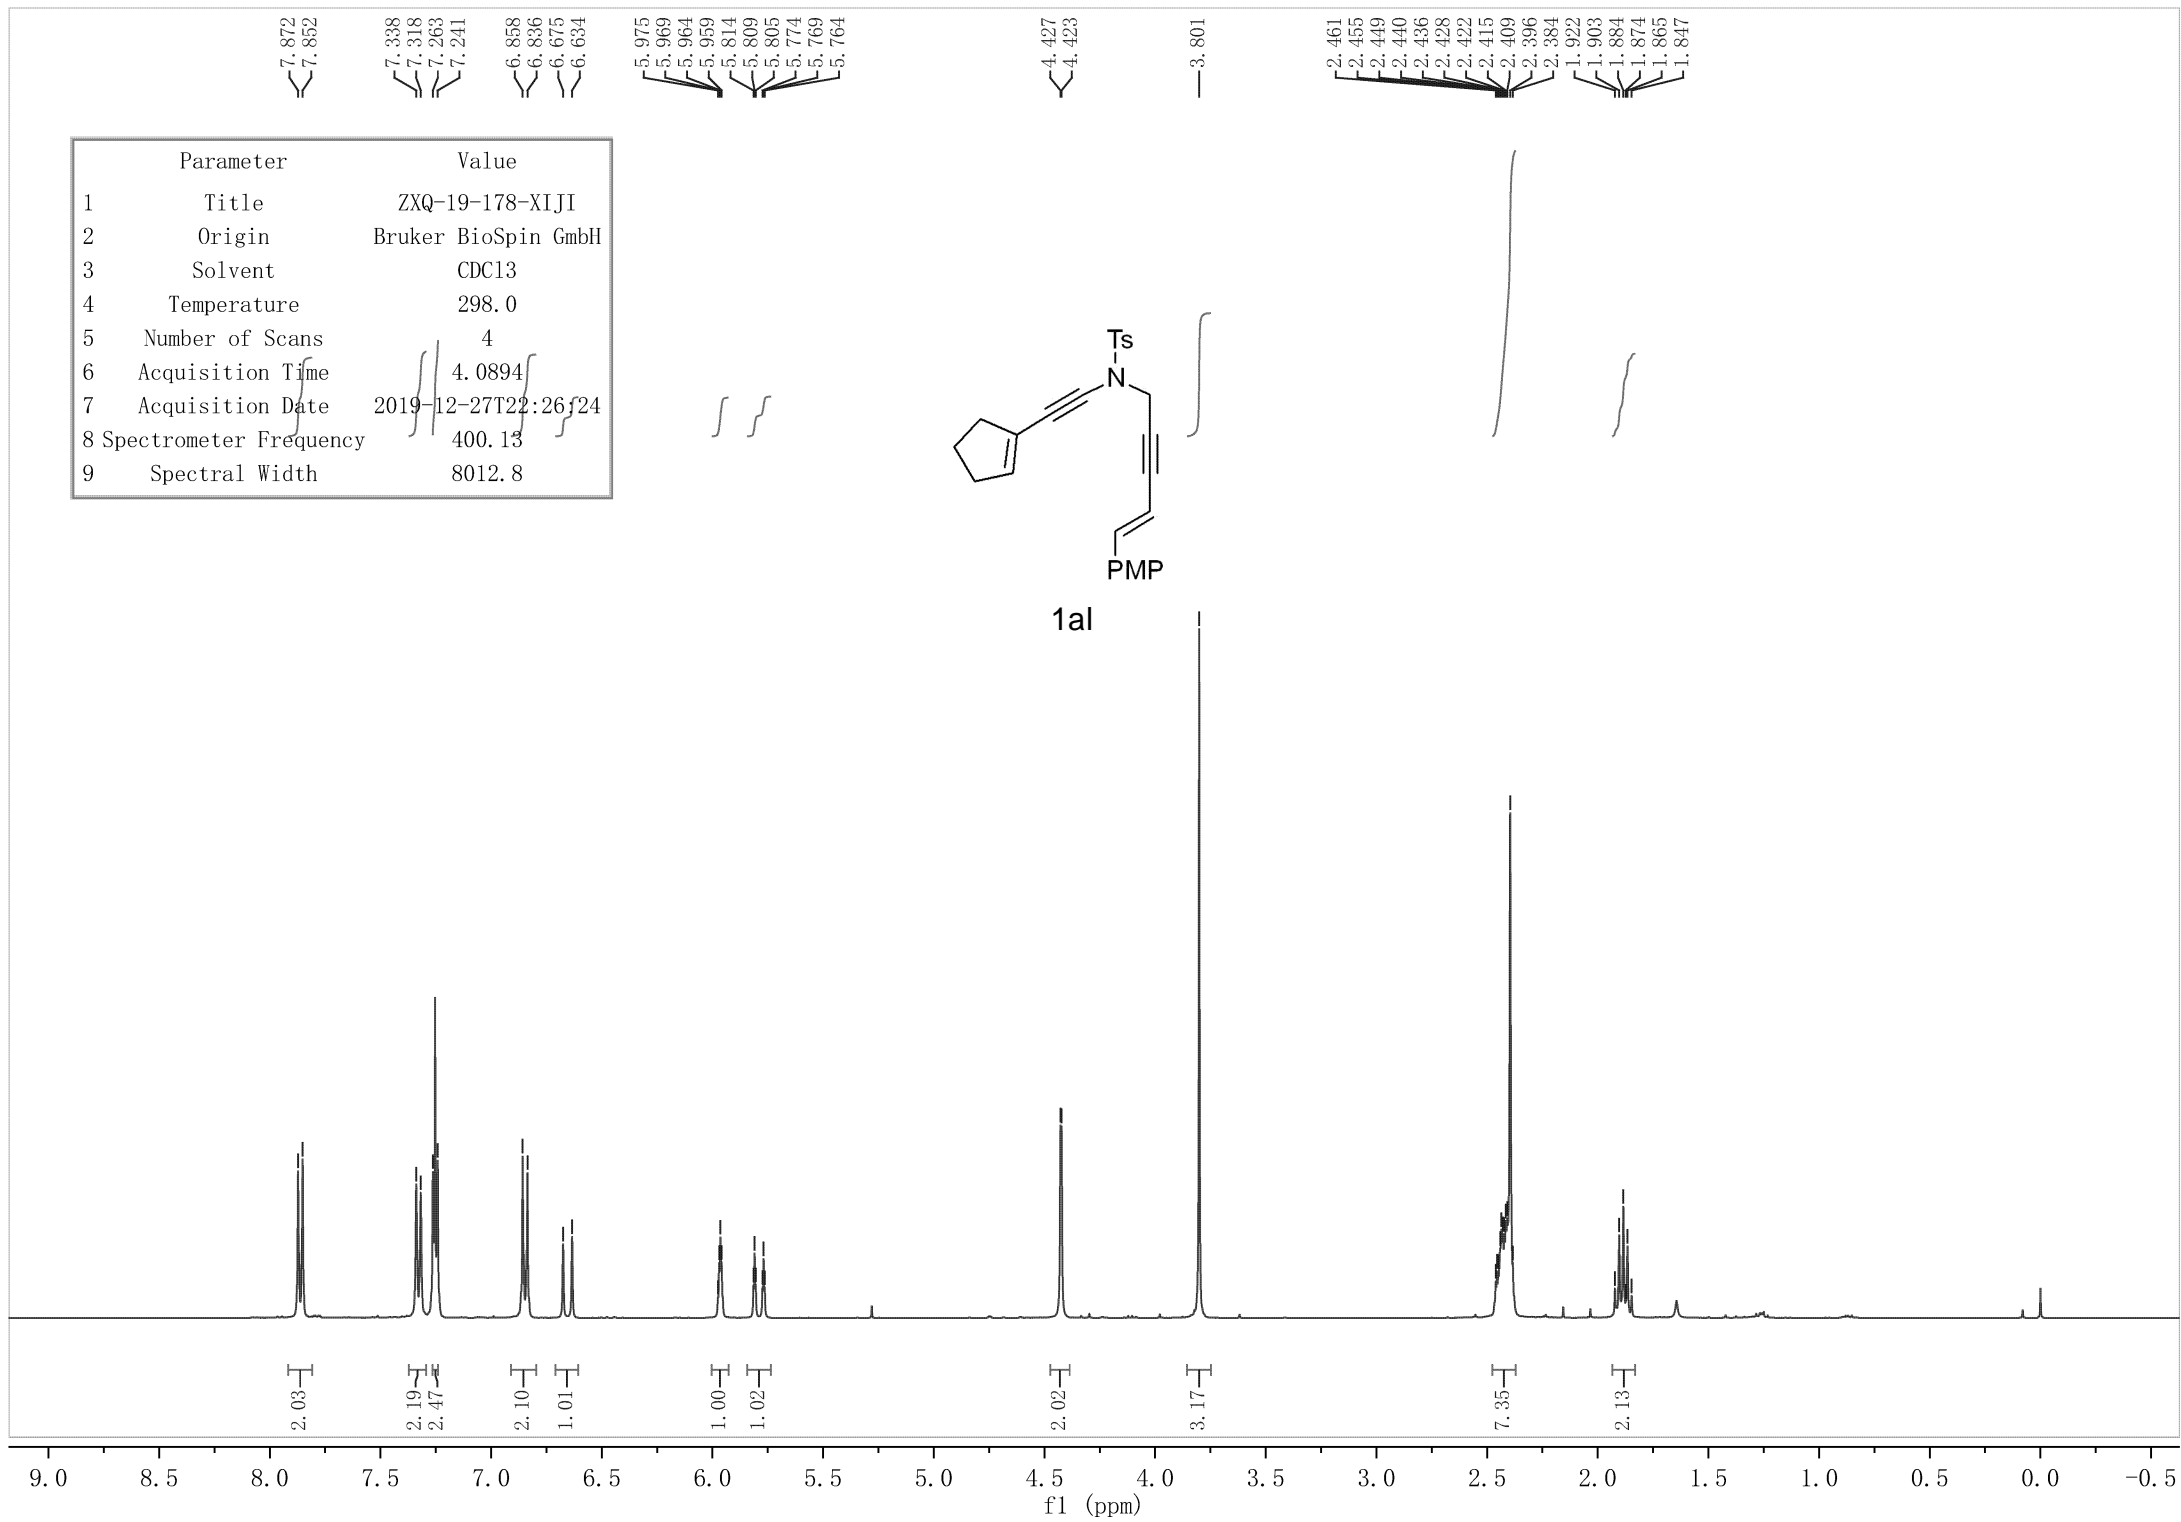

| Parameter                | Value               |
|--------------------------|---------------------|
| 1 Title                  | ZXQ-19-178-XIJI-C   |
| 2 Origin                 | Bruker BioSpin GmbH |
| 3 Solvent                | CDC13               |
| 4 Temperature            | 300.0               |
| 5 Number of Scans        | 15                  |
| 6 Acquisition Time       | 1.3631              |
| 7 Acquisition Date       | 2019-12-27T22:27:20 |
| 8 Spectrometer Frequency | 100.61              |
| 9 Spectral Width         | 24038.5             |

160.29 — 144.71 — 141.88 — 136.80 — 134.38 — 129.51 — 128.73 — 128.29 — 127.61 — 123.62 — 114.22 — 104.54 — 86.01 — 83.04 — 82.58 — 77.42 — 77.10 — 76.79 — 68.65 — 55.35 — 43.15 — 36.56 — 33.27 — 23.25 — 21.70

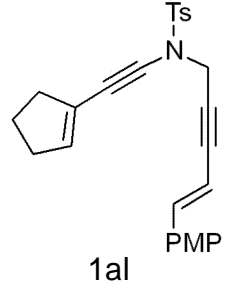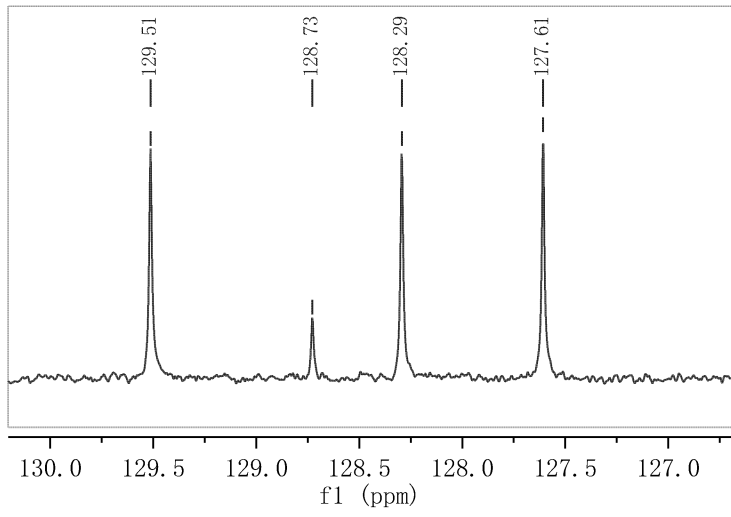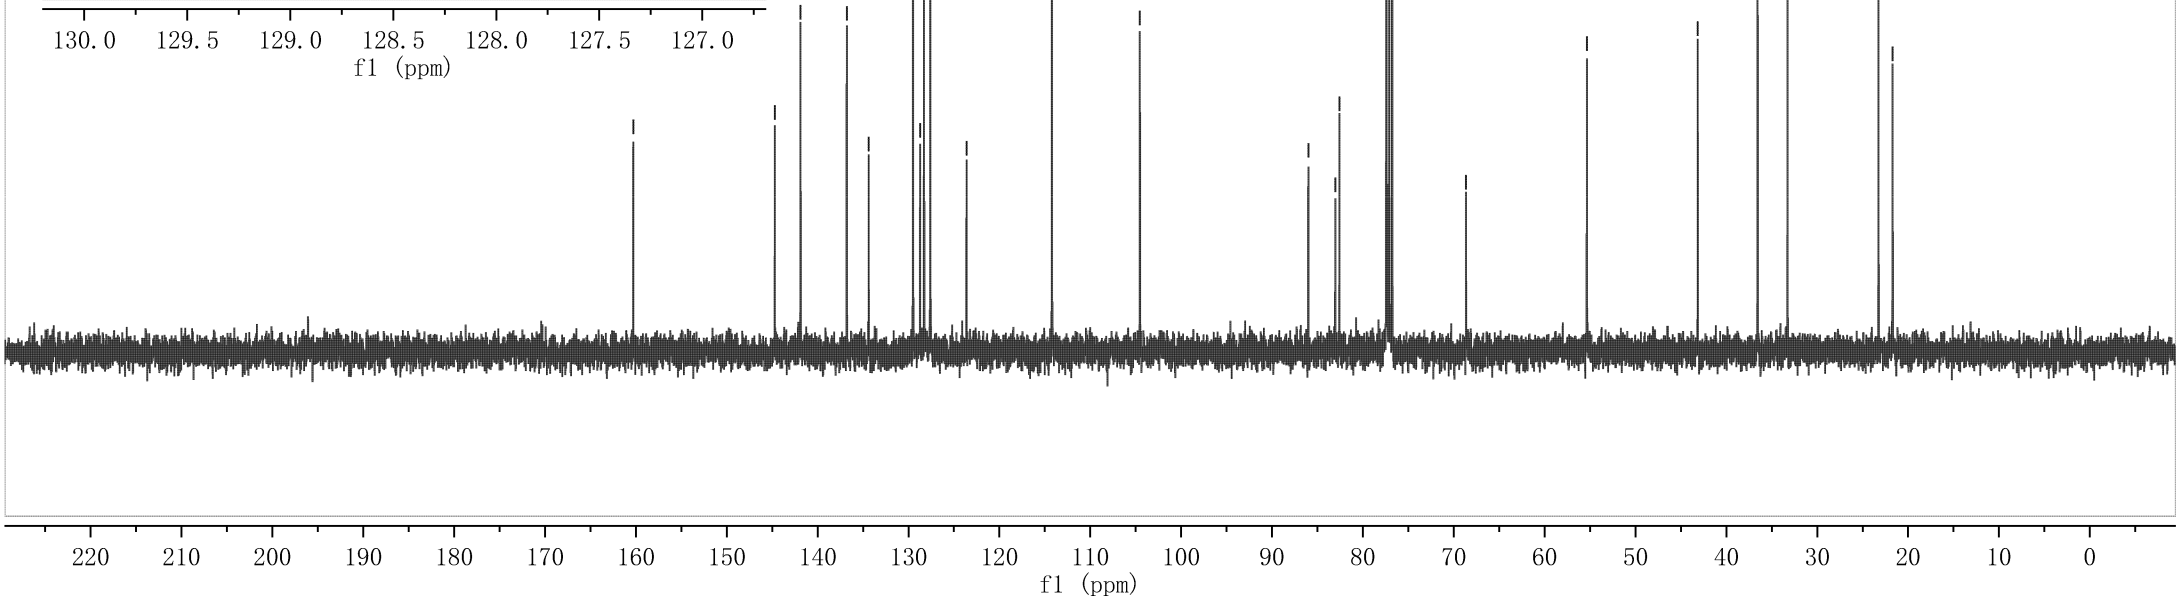

| Parameter                | Value               |
|--------------------------|---------------------|
| 1 Title                  | ZXQ-23-95           |
| 2 Origin                 | Bruker BioSpin GmbH |
| 3 Solvent                | CDC13               |
| 4 Temperature            | 298.0               |
| 5 Number of Scans        | 9                   |
| 6 Acquisition Time       | 4.0894              |
| 7 Acquisition Date       | 2020-11-22T11:50:48 |
| 8 Spectrometer Frequency | 400.13              |
| 9 Spectral Width         | 8012.8              |

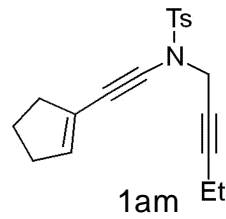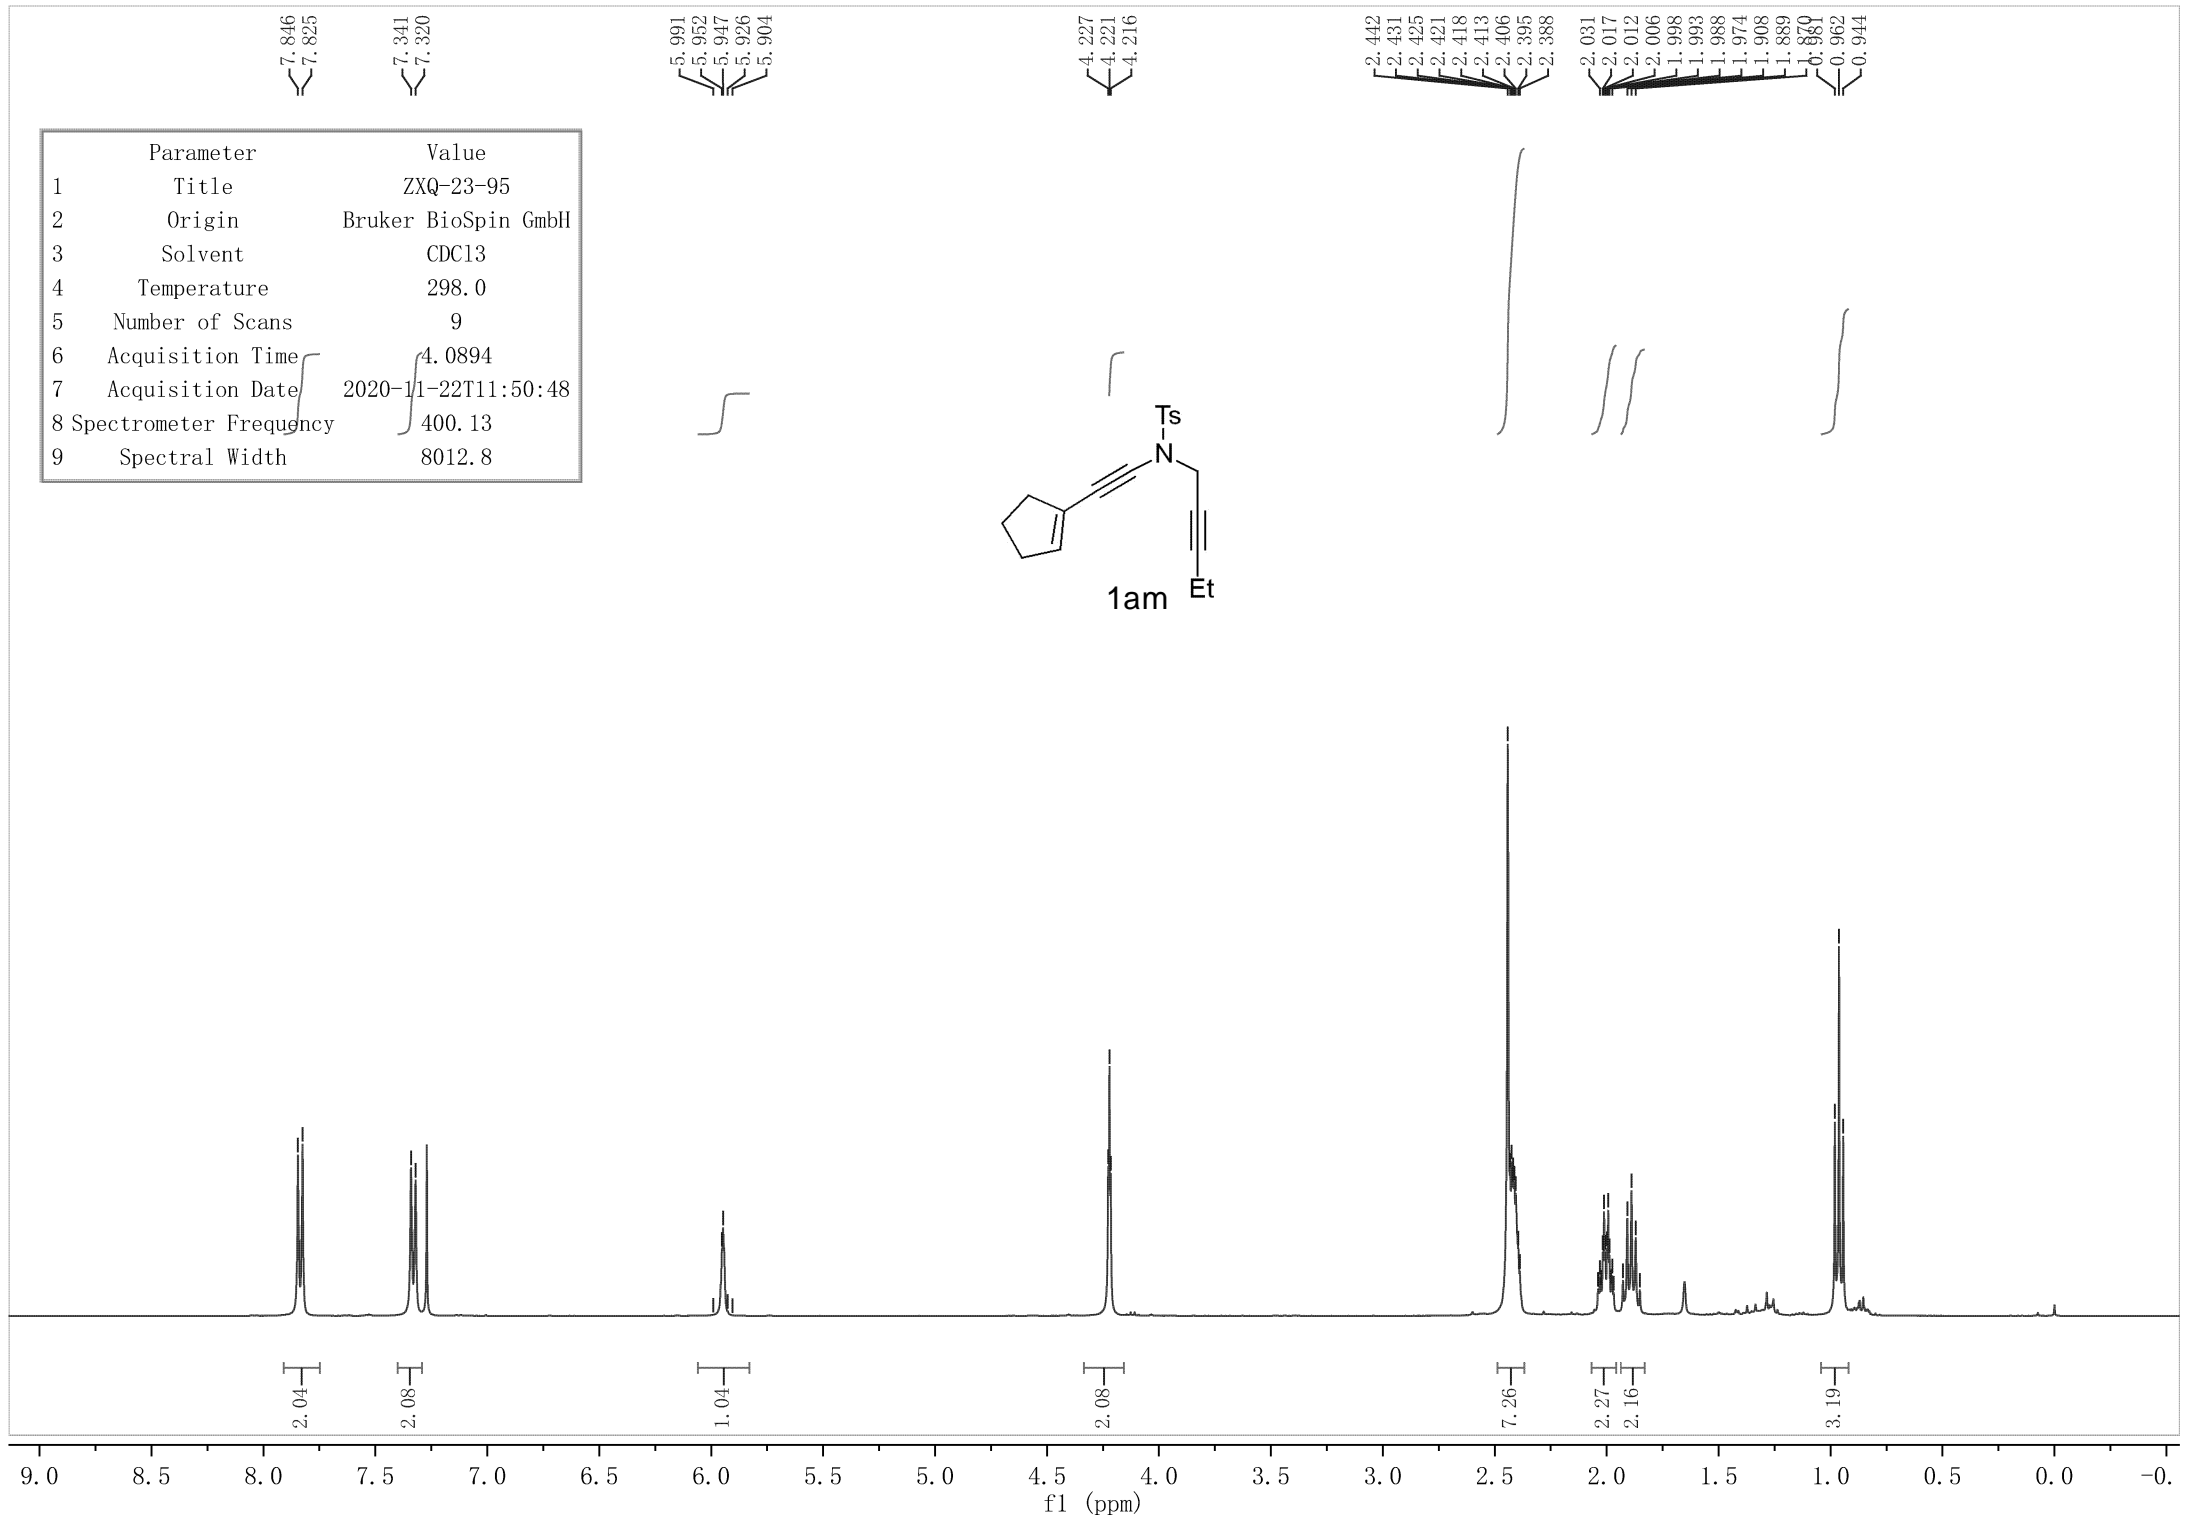

| Parameter                | Value               |
|--------------------------|---------------------|
| 1 Title                  | ZXQ-23-95-C         |
| 2 Origin                 | Bruker BioSpin GmbH |
| 3 Solvent                | CDC13               |
| 4 Temperature            | 300.0               |
| 5 Number of Scans        | 30                  |
| 6 Acquisition Time       | 1.3631              |
| 7 Acquisition Date       | 2020-11-22T11:52:07 |
| 8 Spectrometer Frequency | 100.61              |
| 9 Spectral Width         | 24038.5             |

144.51 136.50 134.37 129.30 128.16 123.60 88.46 82.92 77.32 77.00 76.68 71.37 68.39 42.47 36.46 33.14 23.15 21.56 13.34 12.19

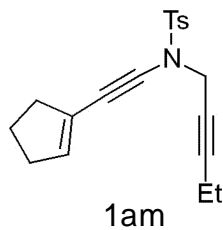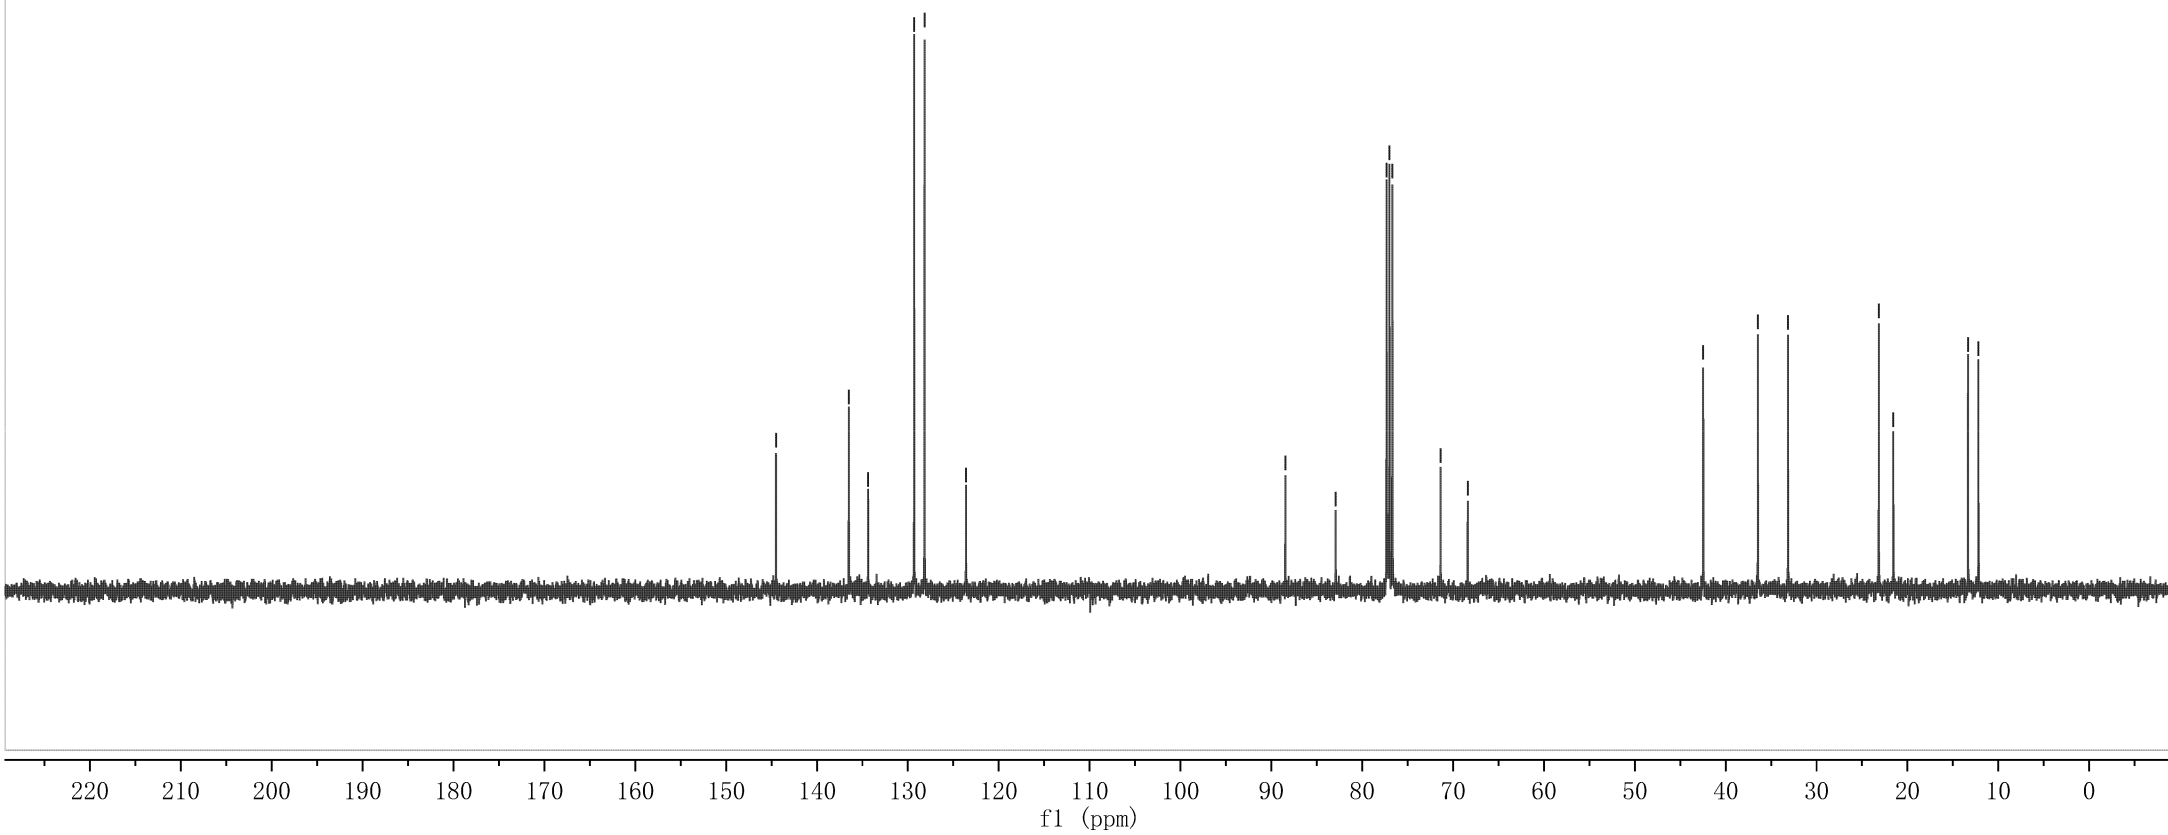



| Parameter                | Value               |
|--------------------------|---------------------|
| 1 Title                  | ZXQ-23-96           |
| 2 Origin                 | Bruker BioSpin GmbH |
| 3 Solvent                | CDC13               |
| 4 Temperature            | 298.0               |
| 5 Number of Scans        | 5                   |
| 6 Acquisition Time       | 4.0894              |
| 7 Acquisition Date       | 2020-11-22T11:56:44 |
| 8 Spectrometer Frequency | 400.13              |
| 9 Spectral Width         | 8012.8              |

7.842  
7.822

7.349  
7.328

6.011  
6.000  
5.965  
5.960  
5.923  
5.918

4.268  
4.262

2.447  
2.429  
2.423  
2.415  
2.410  
2.404  
2.386  
2.201  
2.195  
2.189  
1.925  
1.906  
1.887  
1.868  
1.850

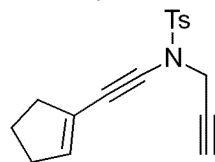

1an

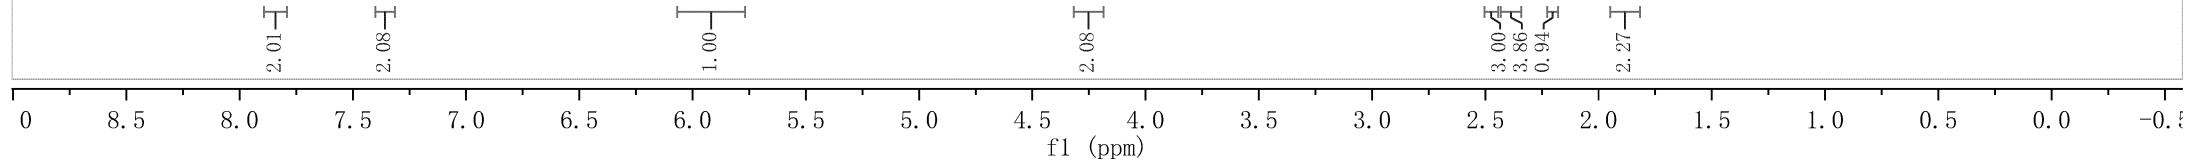

| Parameter                | Value               |
|--------------------------|---------------------|
| 1 Title                  | ZXQ-23-96-C         |
| 2 Origin                 | Bruker BioSpin GmbH |
| 3 Solvent                | CDC13               |
| 4 Temperature            | 300.0               |
| 5 Number of Scans        | 23                  |
| 6 Acquisition Time       | 1.3631              |
| 7 Acquisition Date       | 2020-11-22T11:58:20 |
| 8 Spectrometer Frequency | 100.61              |
| 9 Spectral Width         | 24038.5             |

144.84  
 136.93  
 134.01  
 129.49  
 128.14  
 123.37  
 82.37  
 77.32  
 77.00  
 76.68  
 74.48  
 68.74  
 41.72  
 36.42  
 33.17  
 23.15  
 21.62

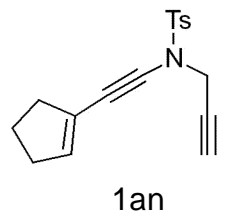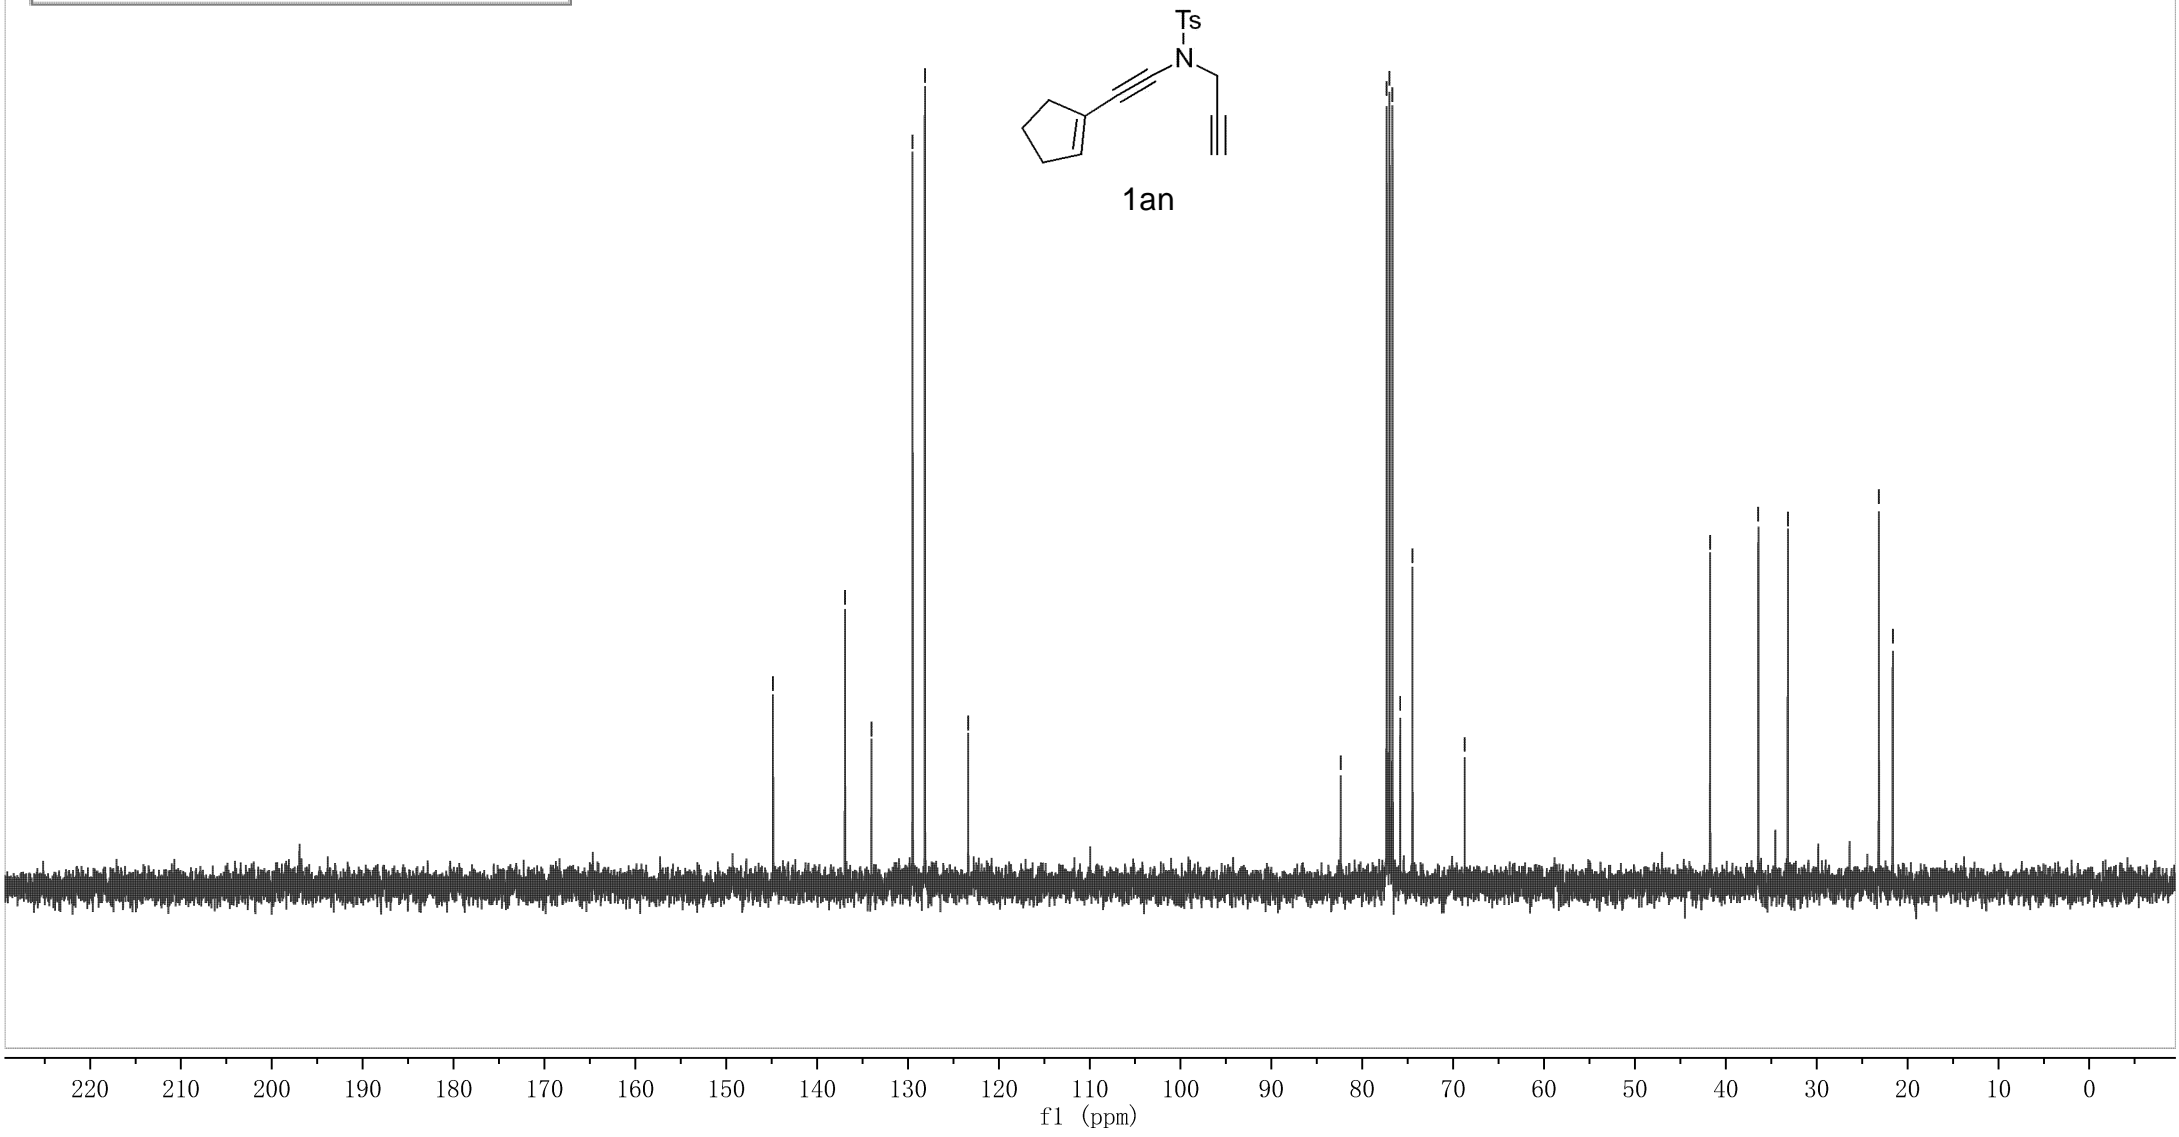

| Parameter                | Value               |
|--------------------------|---------------------|
| 1 Title                  | ZXQ-22-4            |
| 2 Origin                 | Bruker BioSpin GmbH |
| 3 Solvent                | CDCl3               |
| 4 Temperature            | 298.0               |
| 5 Number of Scans        | 7                   |
| 6 Acquisition Time       | 4.0894              |
| 7 Acquisition Date       | 2020-08-14T10:46:58 |
| 8 Spectrometer Frequency | 400.13              |
| 9 Spectral Width         | 8012.8              |

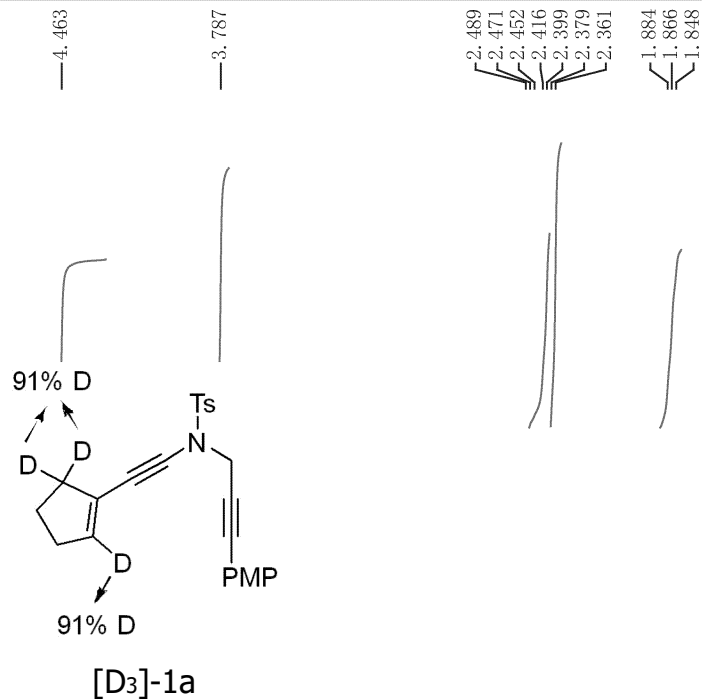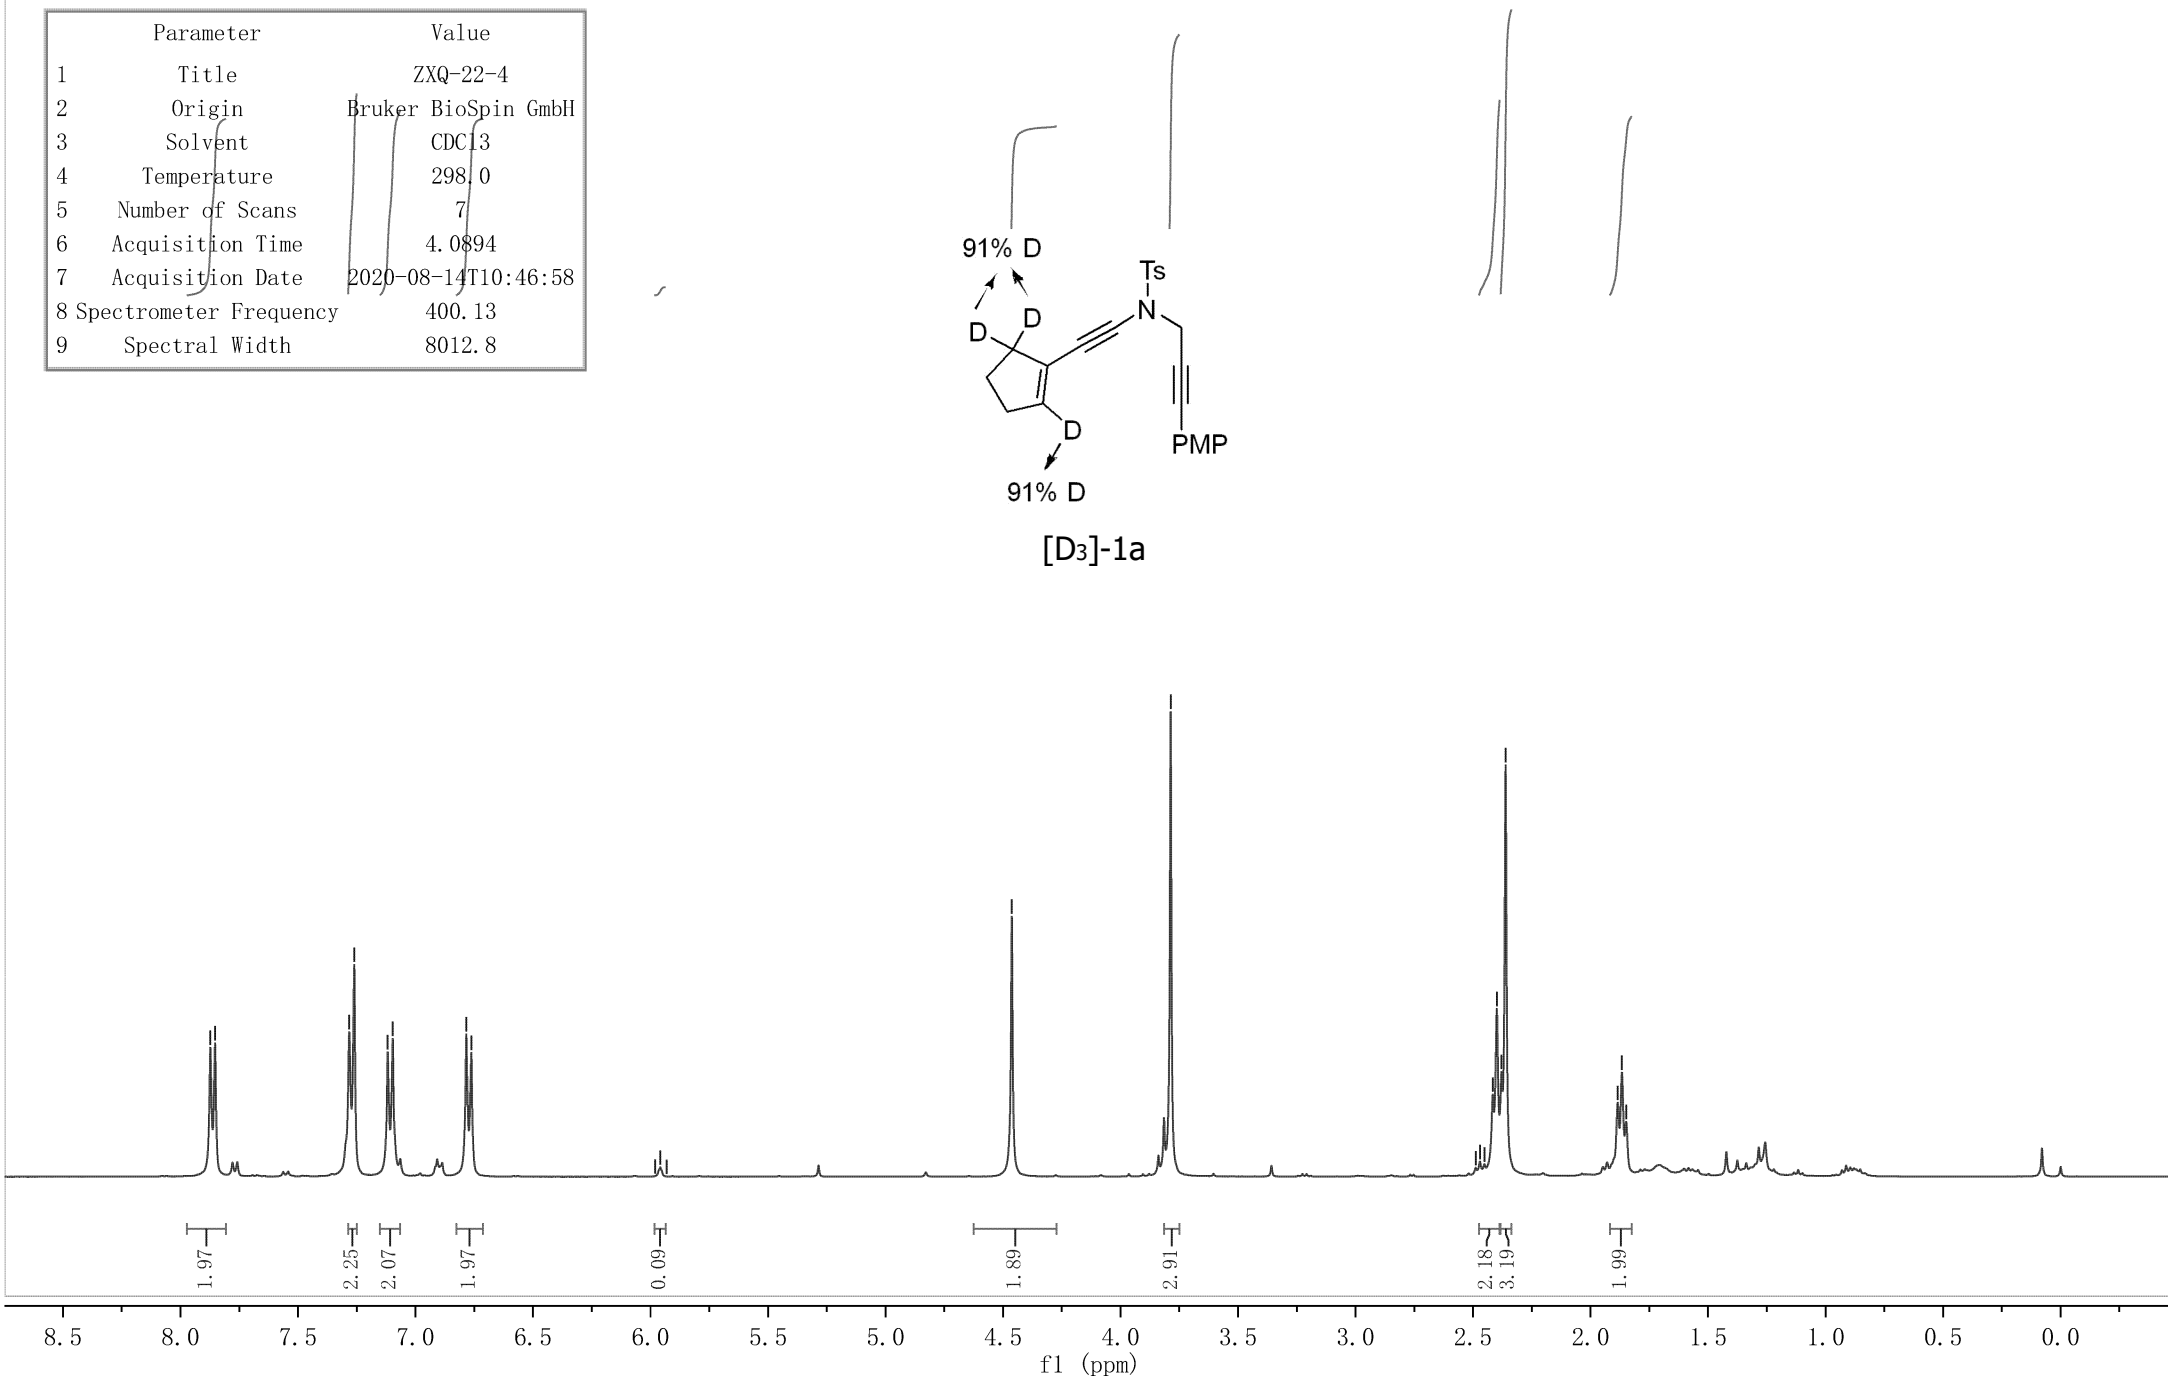

| Parameter                | Value               |
|--------------------------|---------------------|
| 1 Title                  | ZXQ-22-4-C          |
| 2 Origin                 | Bruker BioSpin GmbH |
| 3 Solvent                | CDC13               |
| 4 Temperature            | 300.0               |
| 5 Number of Scans        | 25                  |
| 6 Acquisition Time       | 1.3631              |
| 7 Acquisition Date       | 2020-08-14T10:48:42 |
| 8 Spectrometer Frequency | 100.61              |
| 9 Spectral Width         | 24038.5             |

159.69 — 144.61 — 134.25 133.06 129.40 128.14 123.27 — 114.11 113.67 — 86.27 82.93 79.77 77.32 77.00 76.68 — 68.49 — 55.21 — 42.93 — 33.05 — 22.90 21.52

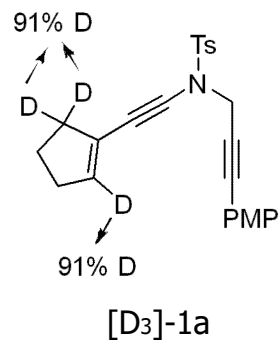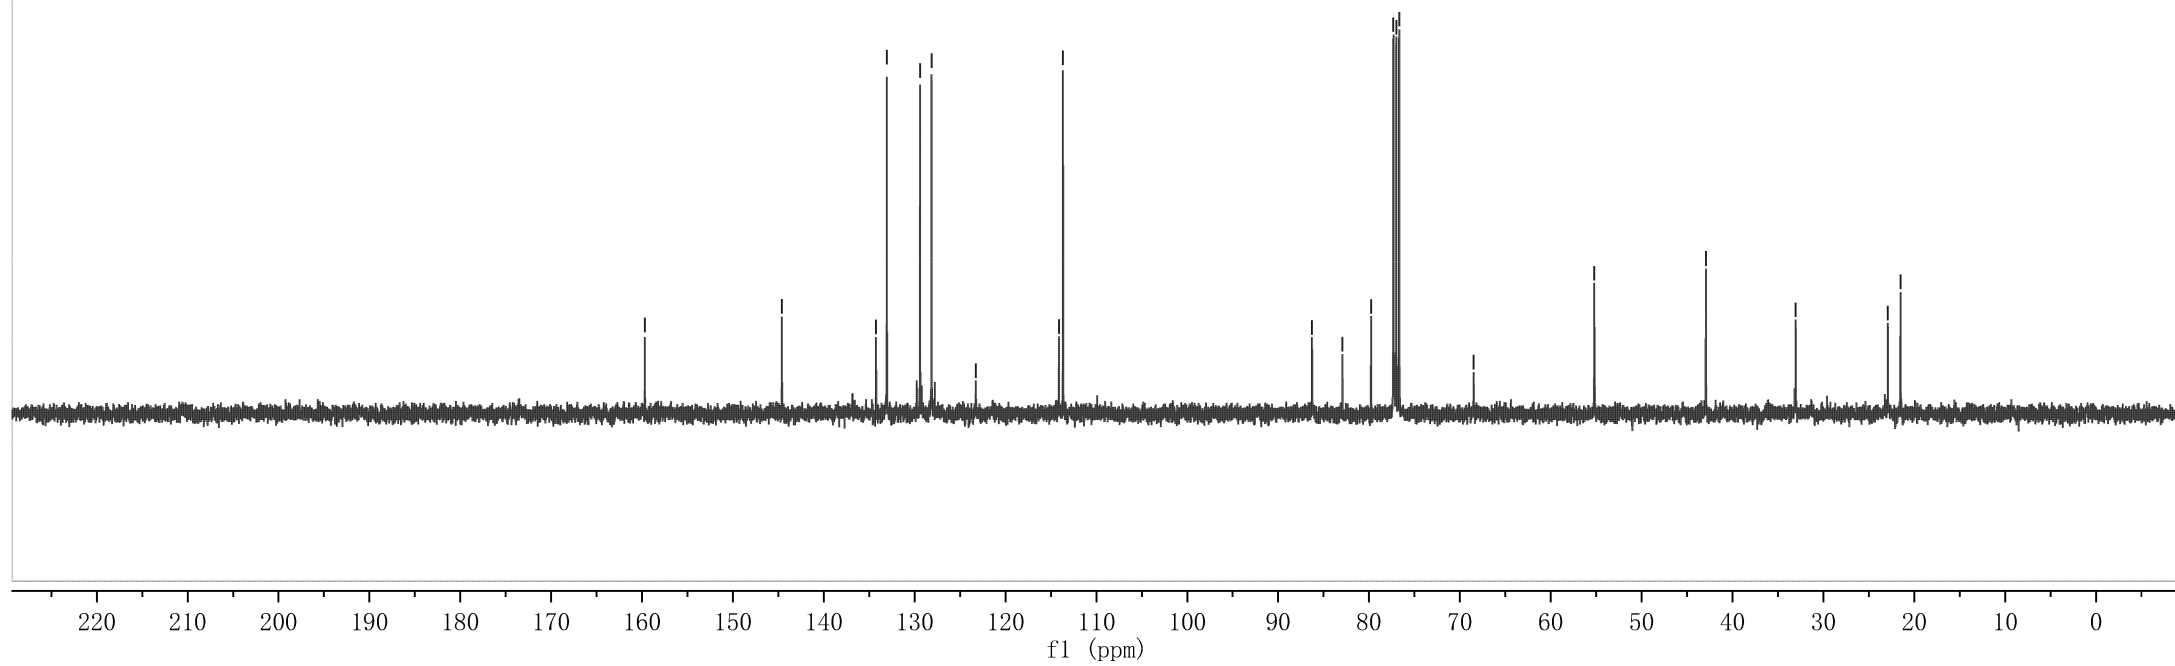

7.873  
7.852  
7.281  
7.124  
7.118  
7.101  
7.096  
6.784  
6.766  
6.762

5.968  
5.962  
5.957  
5.952  
5.929

3.786

2.449  
2.443  
2.438  
2.429  
2.424  
2.418  
2.411  
2.405  
2.391  
2.386  
2.380  
2.360  
1.918  
1.898  
1.880  
1.861  
1.842

| Parameter                | Value               |
|--------------------------|---------------------|
| 1 Title                  | ZXQ-22-48           |
| 2 Origin                 | Bruker BioSpin GmbH |
| 3 Solvent                | CDCl3               |
| 4 Temperature            | 298.0               |
| 5 Number of Scans        | 4                   |
| 6 Acquisition Time       | 4.0894              |
| 7 Acquisition Date       | 2020-08-26T17:20:57 |
| 8 Spectrometer Frequency | 400.13              |
| 9 Spectral Width         | 8012.8              |

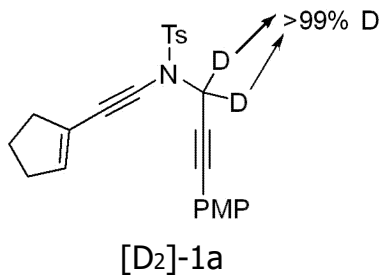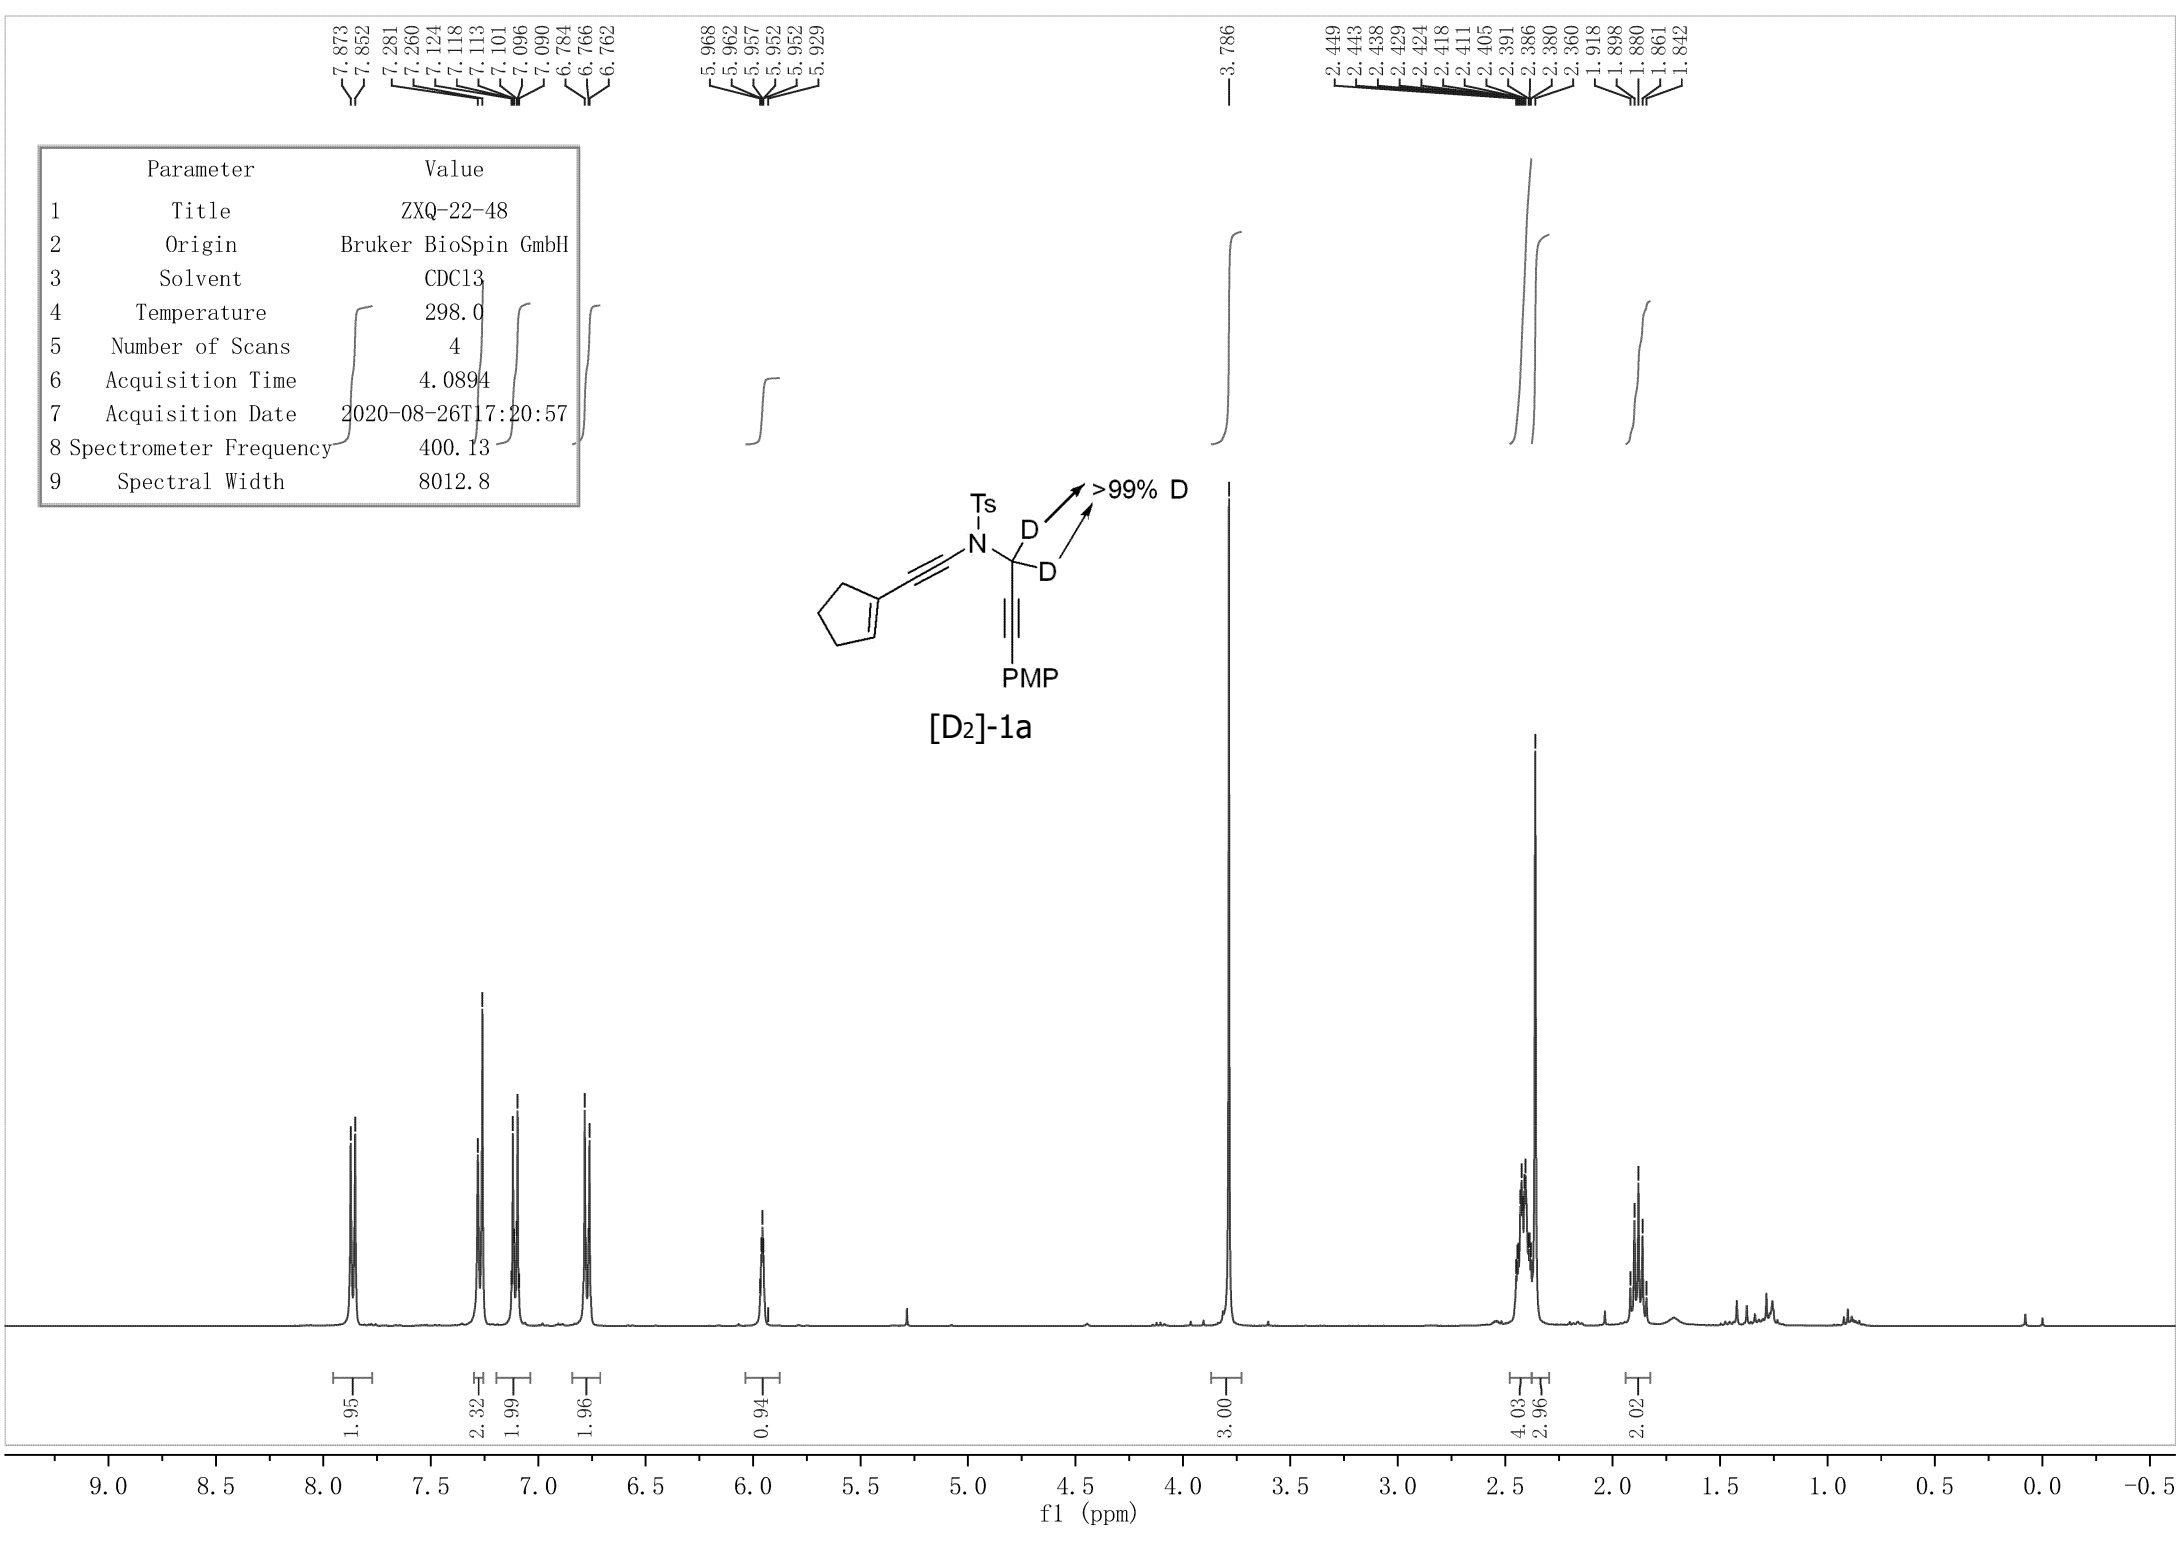

| Parameter                | Value               |
|--------------------------|---------------------|
| 1 Title                  | ZXQ-22-48-C         |
| 2 Origin                 | Bruker BioSpin GmbH |
| 3 Solvent                | CDC13               |
| 4 Temperature            | 300.0               |
| 5 Number of Scans        | 41                  |
| 6 Acquisition Time       | 1.3631              |
| 7 Acquisition Date       | 2020-08-26T17:22:14 |
| 8 Spectrometer Frequency | 100.61              |
| 9 Spectral Width         | 24038.5             |

159.69 — 144.61 — 136.75 134.25 133.06 129.40 128.14 123.52 — 114.10 113.67 — 86.27 82.90 79.70 77.32 77.00 76.68 — 68.48 — 55.20 — 36.45 33.15 — 23.14 21.51

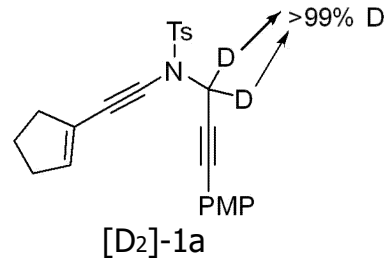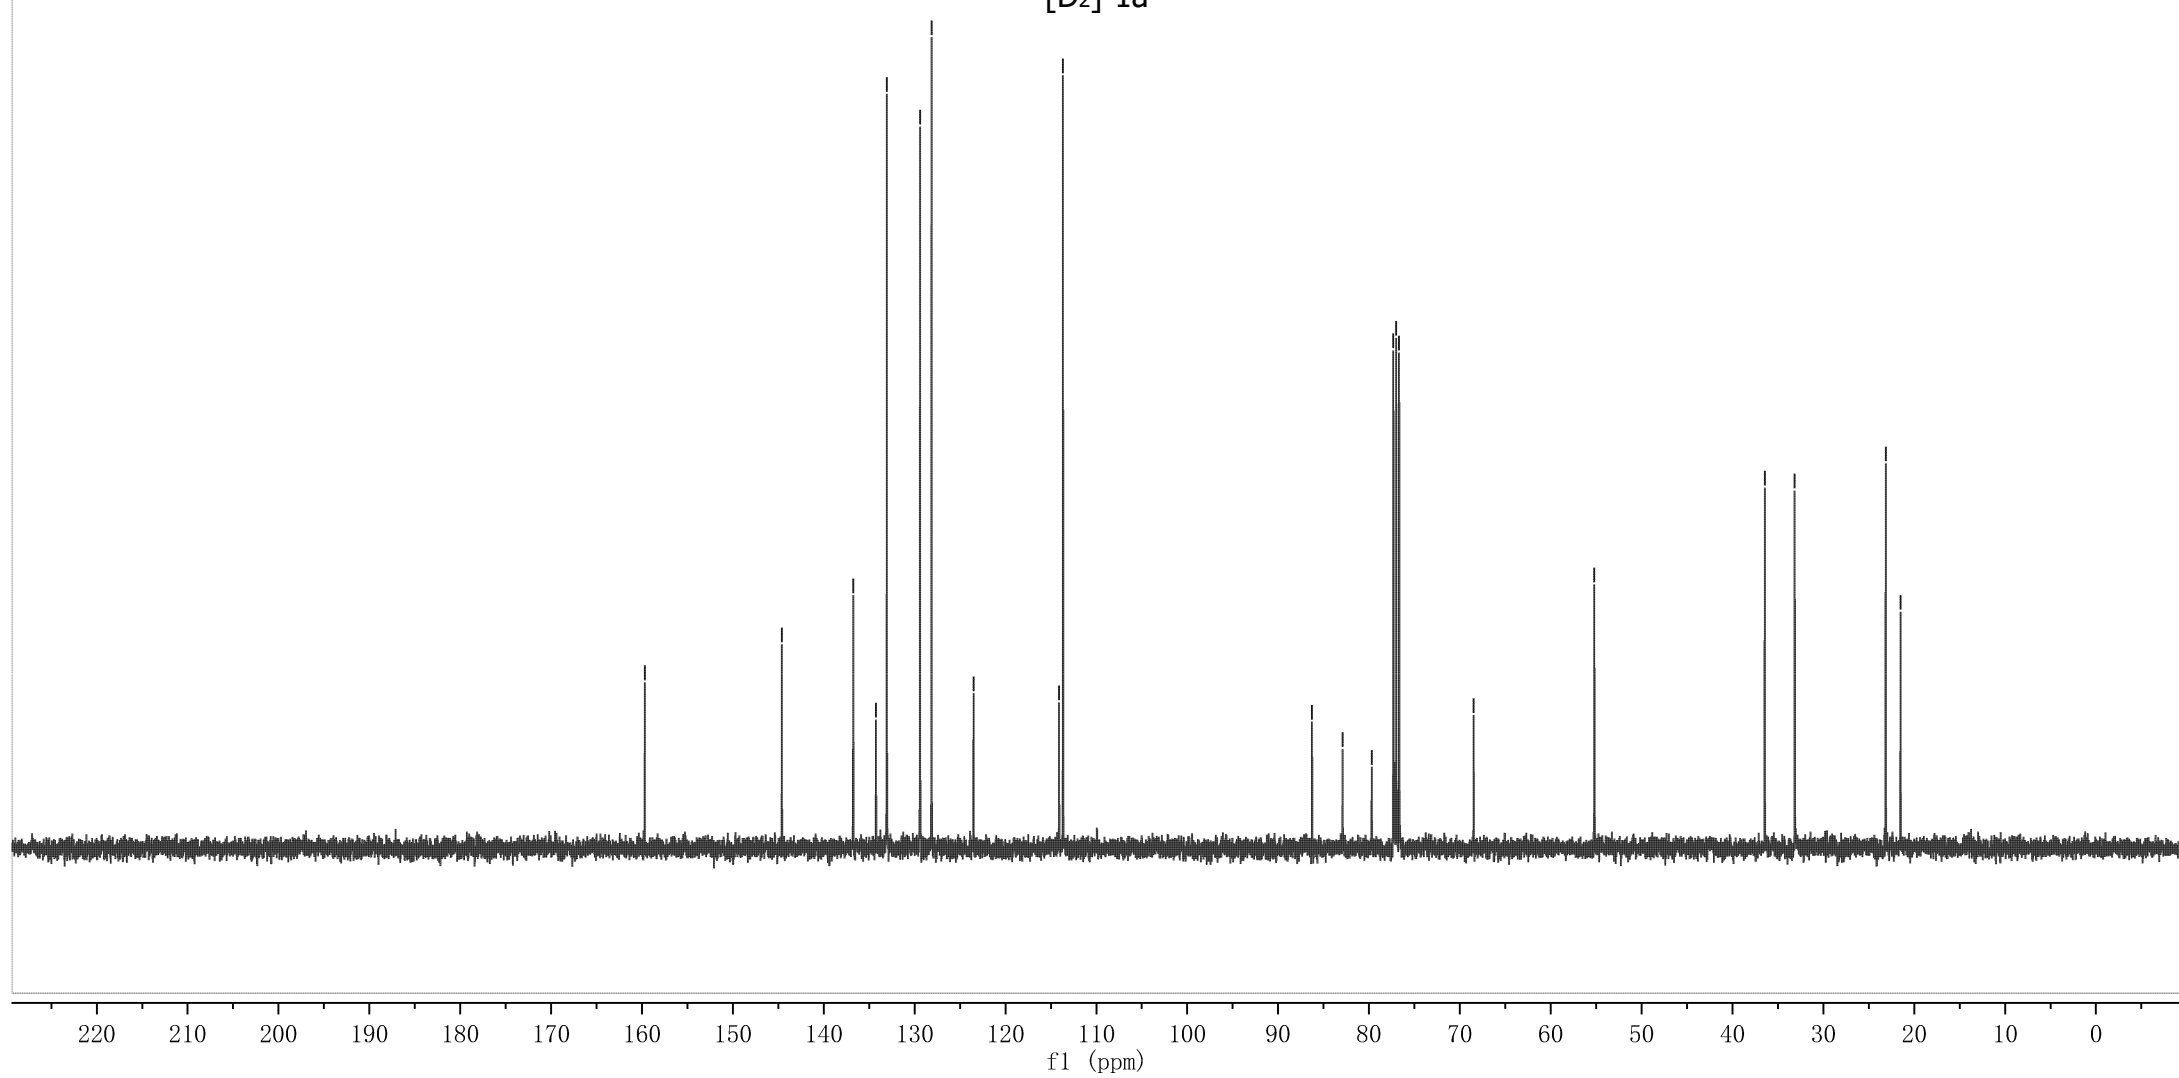

7.800  
7.779  
7.376  
7.340  
7.320  
7.303  
7.297  
7.293  
7.272  
7.259  
7.154  
7.149  
7.099  
7.074  
7.047  
7.028  
7.010  
6.995  
6.910  
6.878  
6.869  
5.732  
5.713

2.604  
2.555  
2.537  
2.522  
2.517  
2.432  
2.373  
2.357  
2.342  
2.314  
2.295  
1.907  
1.891  
1.872  
1.853  
1.834  
1.816

| Parameter                | Value               |
|--------------------------|---------------------|
| 1 Title                  | ZXQ-22-37           |
| 2 Origin                 | Bruker BioSpin GmbH |
| 3 Solvent                | CDC13               |
| 4 Temperature            | 298.0               |
| 5 Number of Scans        | 4                   |
| 6 Acquisition Time       | 4.0894              |
| 7 Acquisition Date       | 2020-08-24T22:01:29 |
| 8 Spectrometer Frequency | 400.13              |
| 9 Spectral Width         | 8012.8              |

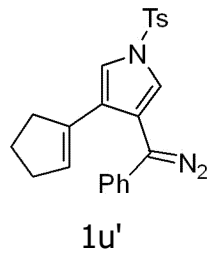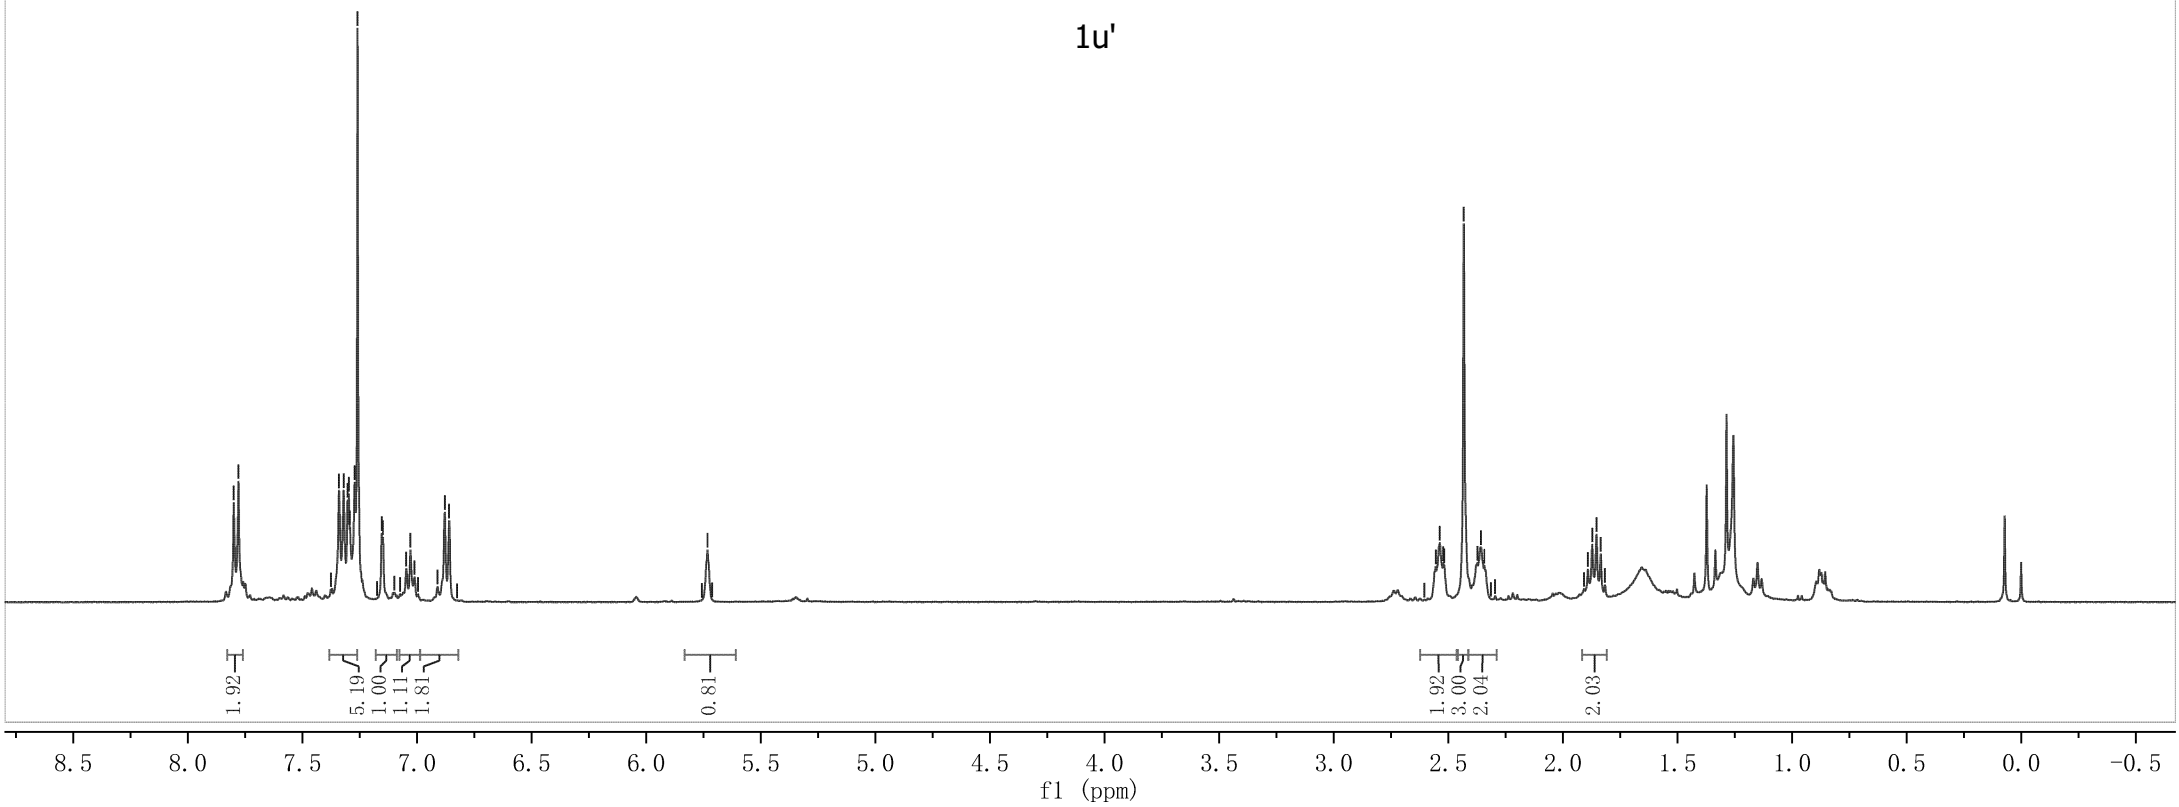

| Parameter                | Value               |
|--------------------------|---------------------|
| 1 Title                  | ZXQ-19-168          |
| 2 Origin                 | Bruker BioSpin GmbH |
| 3 Solvent                | CDC13               |
| 4 Temperature            | 298.0               |
| 5 Number of Scans        | 7                   |
| 6 Acquisition Time       | 4.0894              |
| 7 Acquisition Date       | 2019-12-31T15:36:09 |
| 8 Spectrometer Frequency | 400.13              |
| 9 Spectral Width         | 8012.8              |

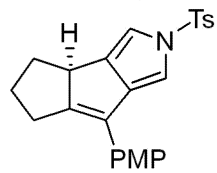

2a

7.755  
7.734  
7.462  
7.440  
7.248  
7.232  
7.056  
7.053  
6.971  
6.968  
6.958  
6.951  
6.946  
6.934  
6.929  
6.922

3.826  
3.584  
3.565  
3.556  
3.537

2.738  
2.727  
2.718  
2.706  
2.695  
2.682  
2.678  
2.663  
2.418  
2.397  
2.358  
2.212  
2.208  
2.203  
2.196  
2.189  
2.181  
2.171  
2.079  
1.889  
1.066  
1.060  
1.039  
1.036  
1.031  
1.009  
0.981

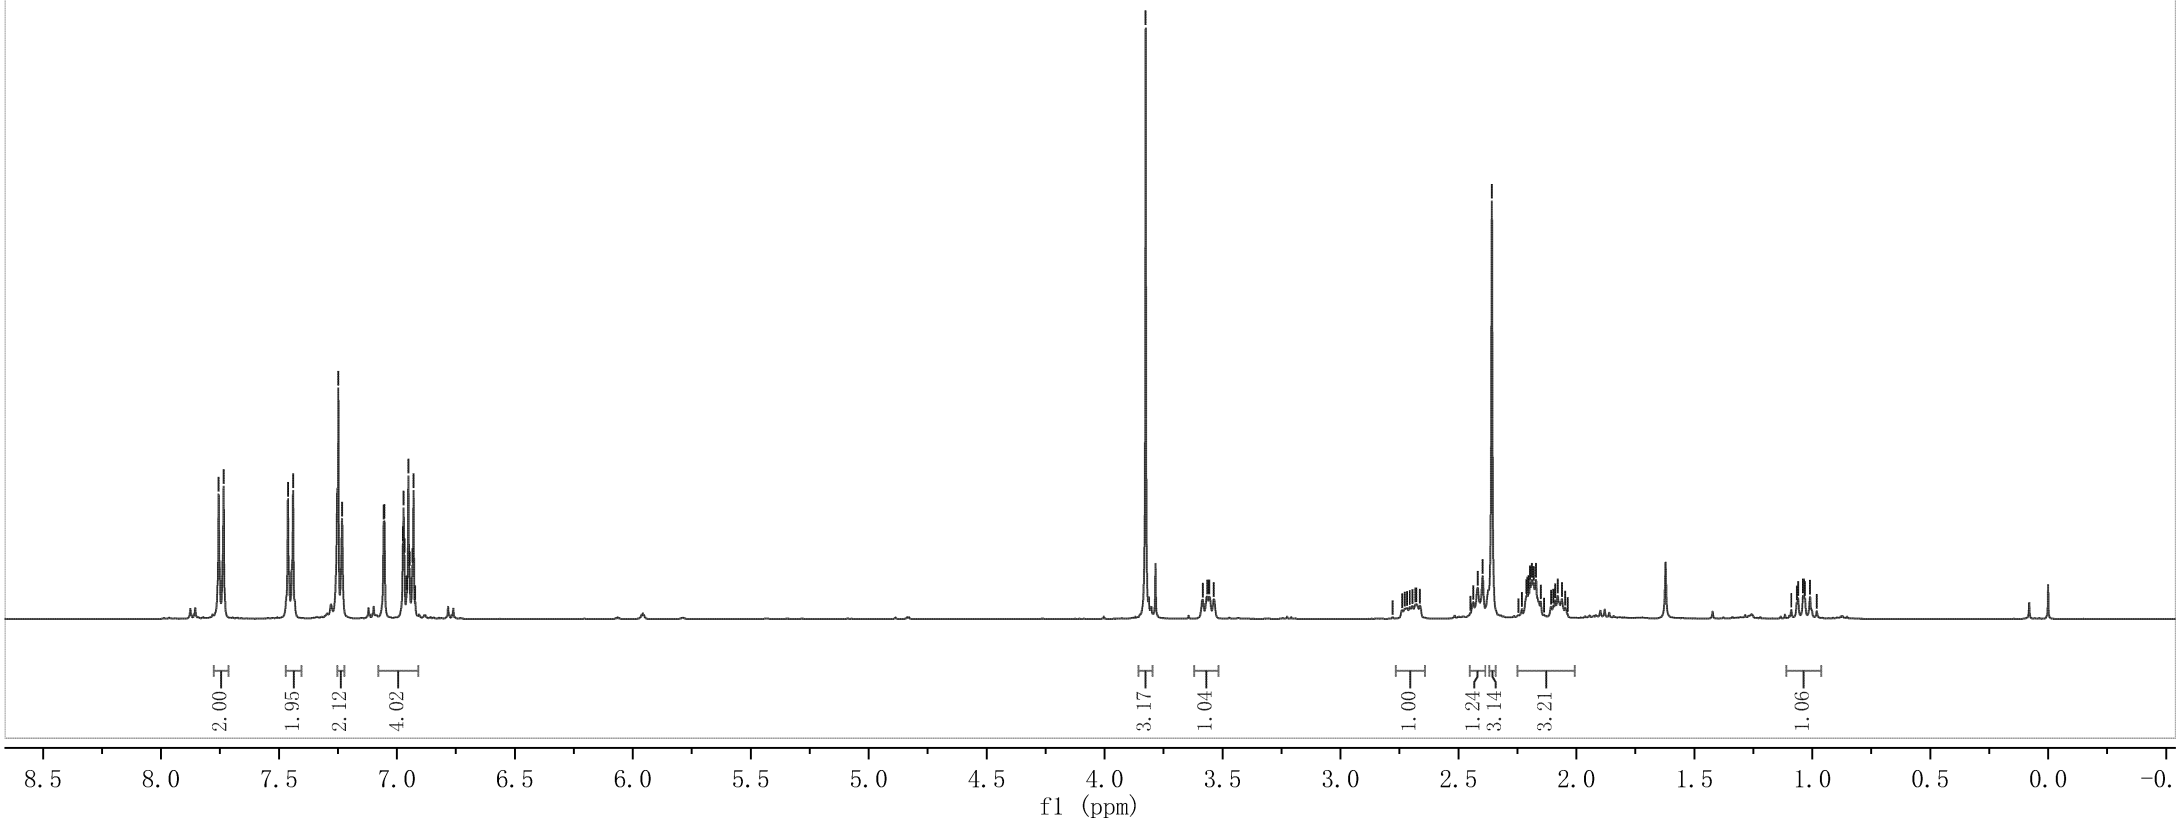



| Parameter                | Value               |
|--------------------------|---------------------|
| 1 Title                  | ZXQ-19-168-C        |
| 2 Origin                 | Bruker BioSpin GmbH |
| 3 Solvent                | CDC13               |
| 4 Temperature            | 300.0               |
| 5 Number of Scans        | 23                  |
| 6 Acquisition Time       | 1.3631              |
| 7 Acquisition Date       | 2019-12-31T15:37:42 |
| 8 Spectrometer Frequency | 100.61              |
| 9 Spectral Width         | 24038.5             |

158.66  
157.77

144.40  
141.50

136.47  
134.92  
129.78  
128.41  
127.42  
127.32  
126.66

113.87  
113.22  
107.75

77.32  
77.00  
76.68

55.26

49.63

29.57  
27.81  
24.99  
21.50

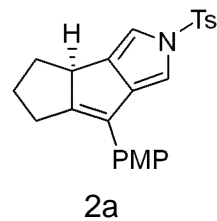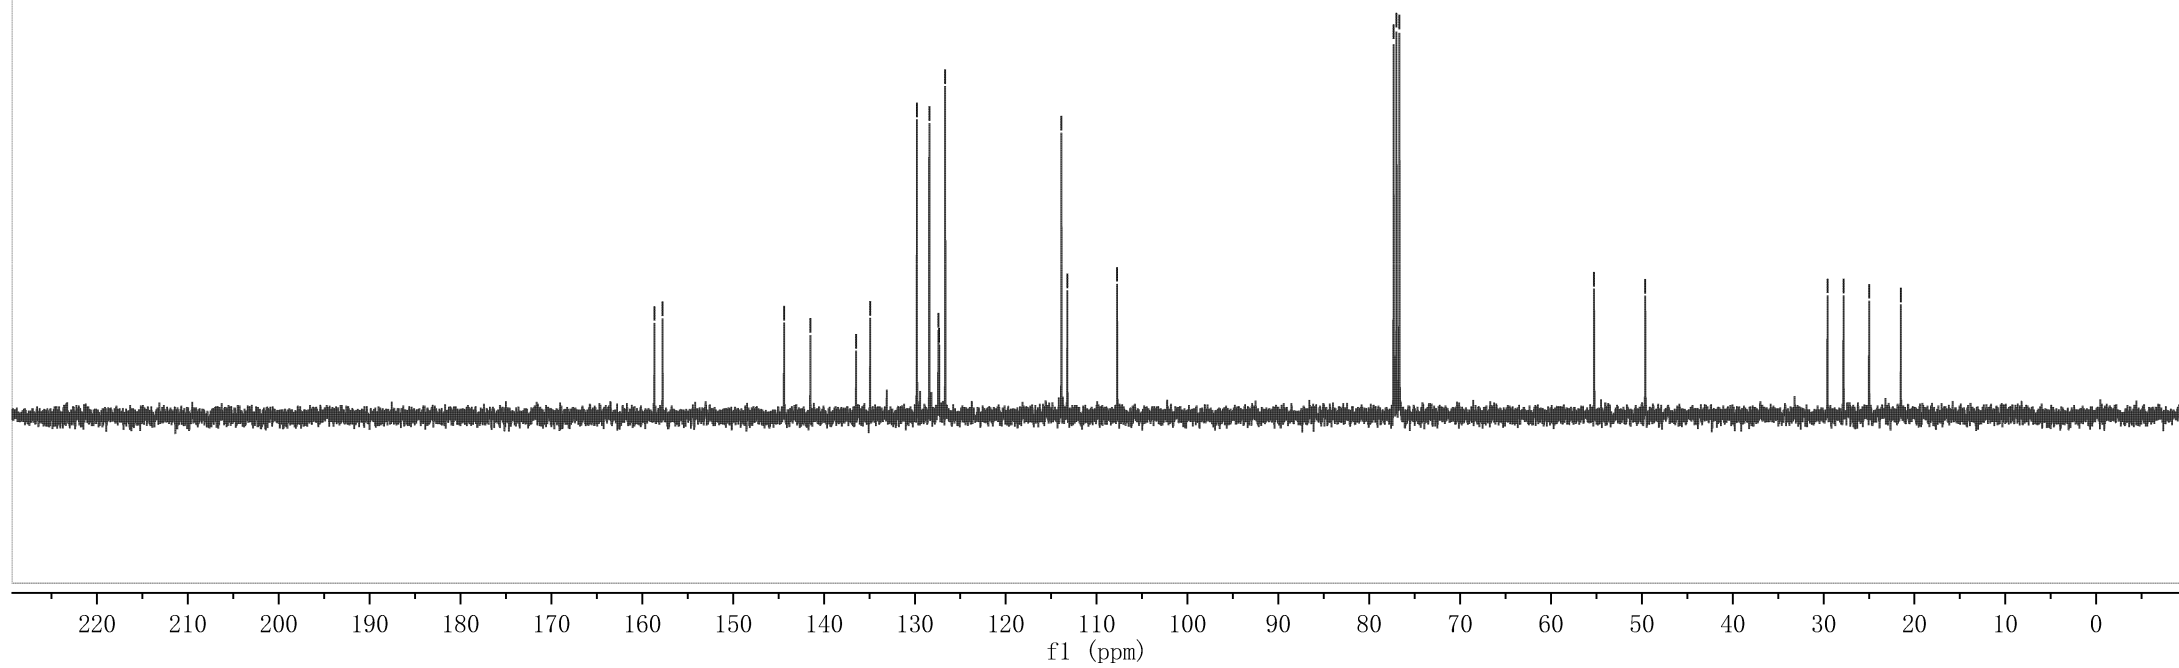

| Parameter                | Value               |
|--------------------------|---------------------|
| 1 Title                  | ZXQ-19-168-C-DEPT   |
| 2 Origin                 | Bruker BioSpin GmbH |
| 3 Solvent                | CDC13               |
| 4 Temperature            | 300.0               |
| 5 Number of Scans        | 18                  |
| 6 Acquisition Time       | 1.3631              |
| 7 Acquisition Date       | 2019-12-31T15:39:28 |
| 8 Spectrometer Frequency | 100.61              |
| 9 Spectral Width         | 24038.5             |

129.79  
128.42  
126.67

113.88  
113.23  
107.76

55.27  
49.63

29.58  
27.82  
25.00  
21.51

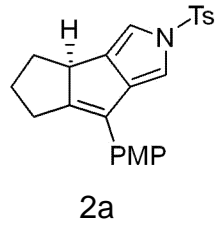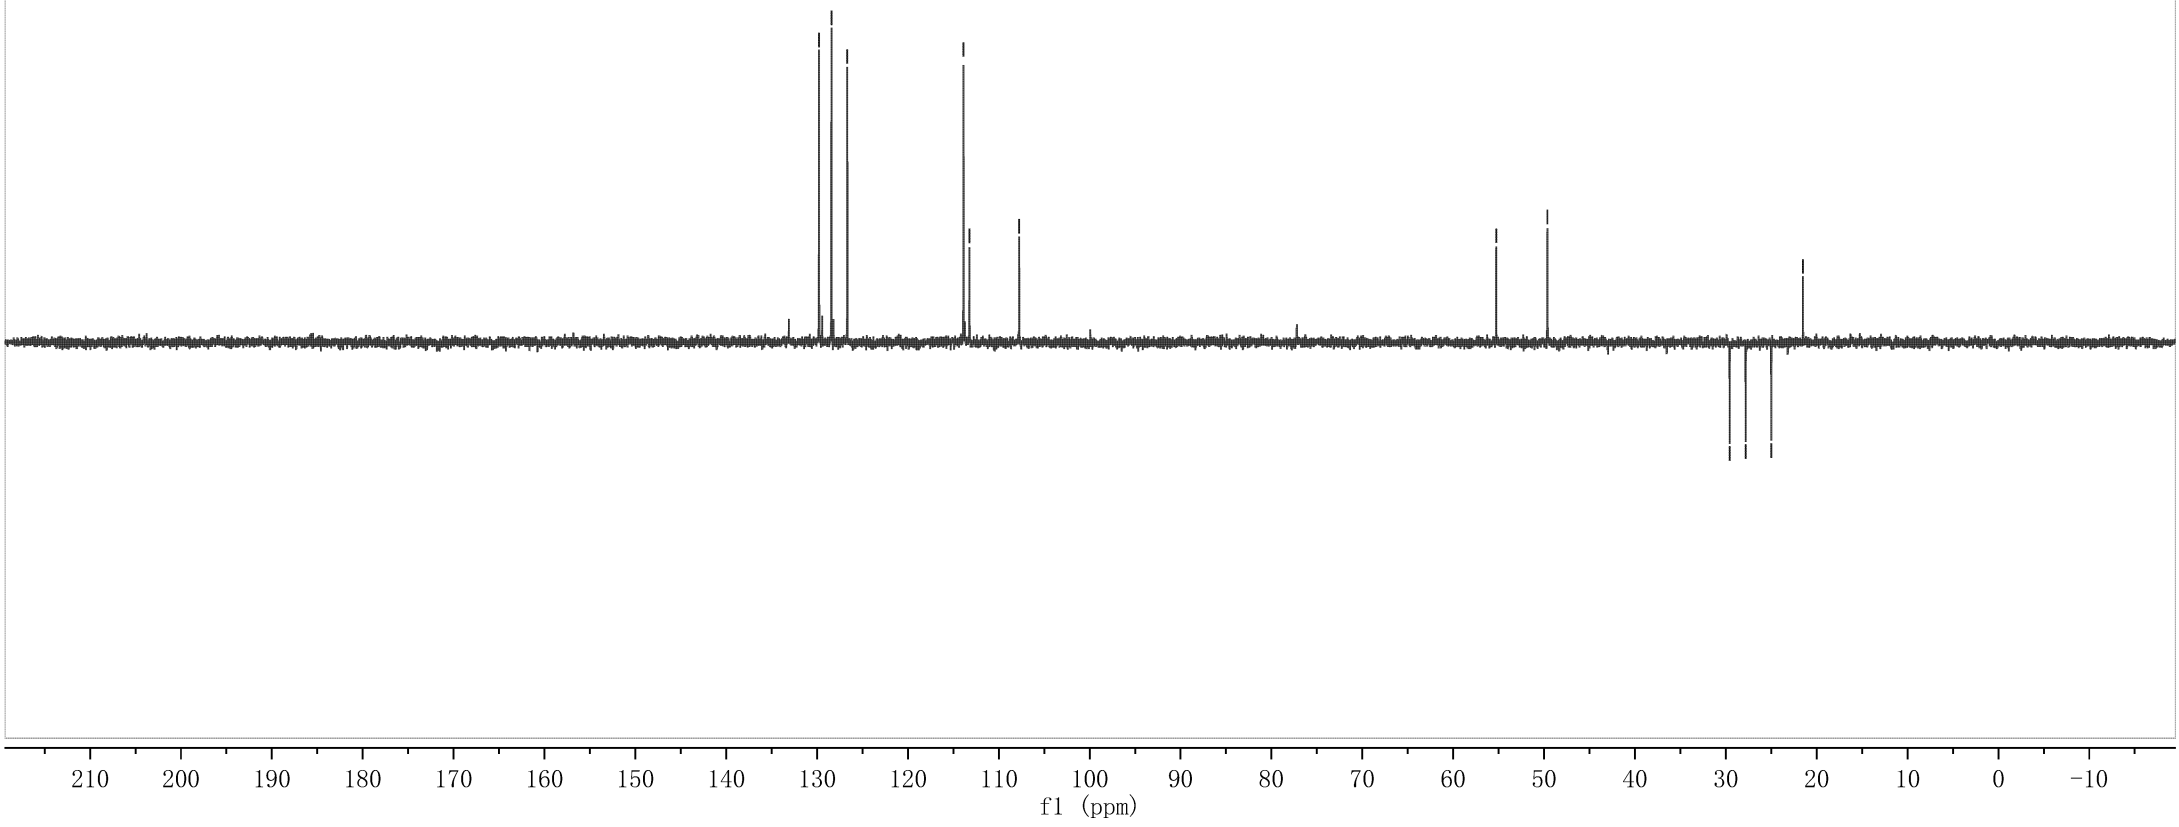

| Parameter                | Value               |
|--------------------------|---------------------|
| 1 Title                  | ZXQ-20-12           |
| 2 Origin                 | Bruker BioSpin GmbH |
| 3 Solvent                | CDCl3               |
| 4 Temperature            | 298.0               |
| 5 Number of Scans        | 4                   |
| 6 Acquisition Time       | 4.0894              |
| 7 Acquisition Date       | 2020-04-08T11:16:23 |
| 8 Spectrometer Frequency | 400.13              |
| 9 Spectral Width         | 8012.8              |

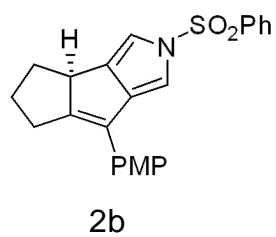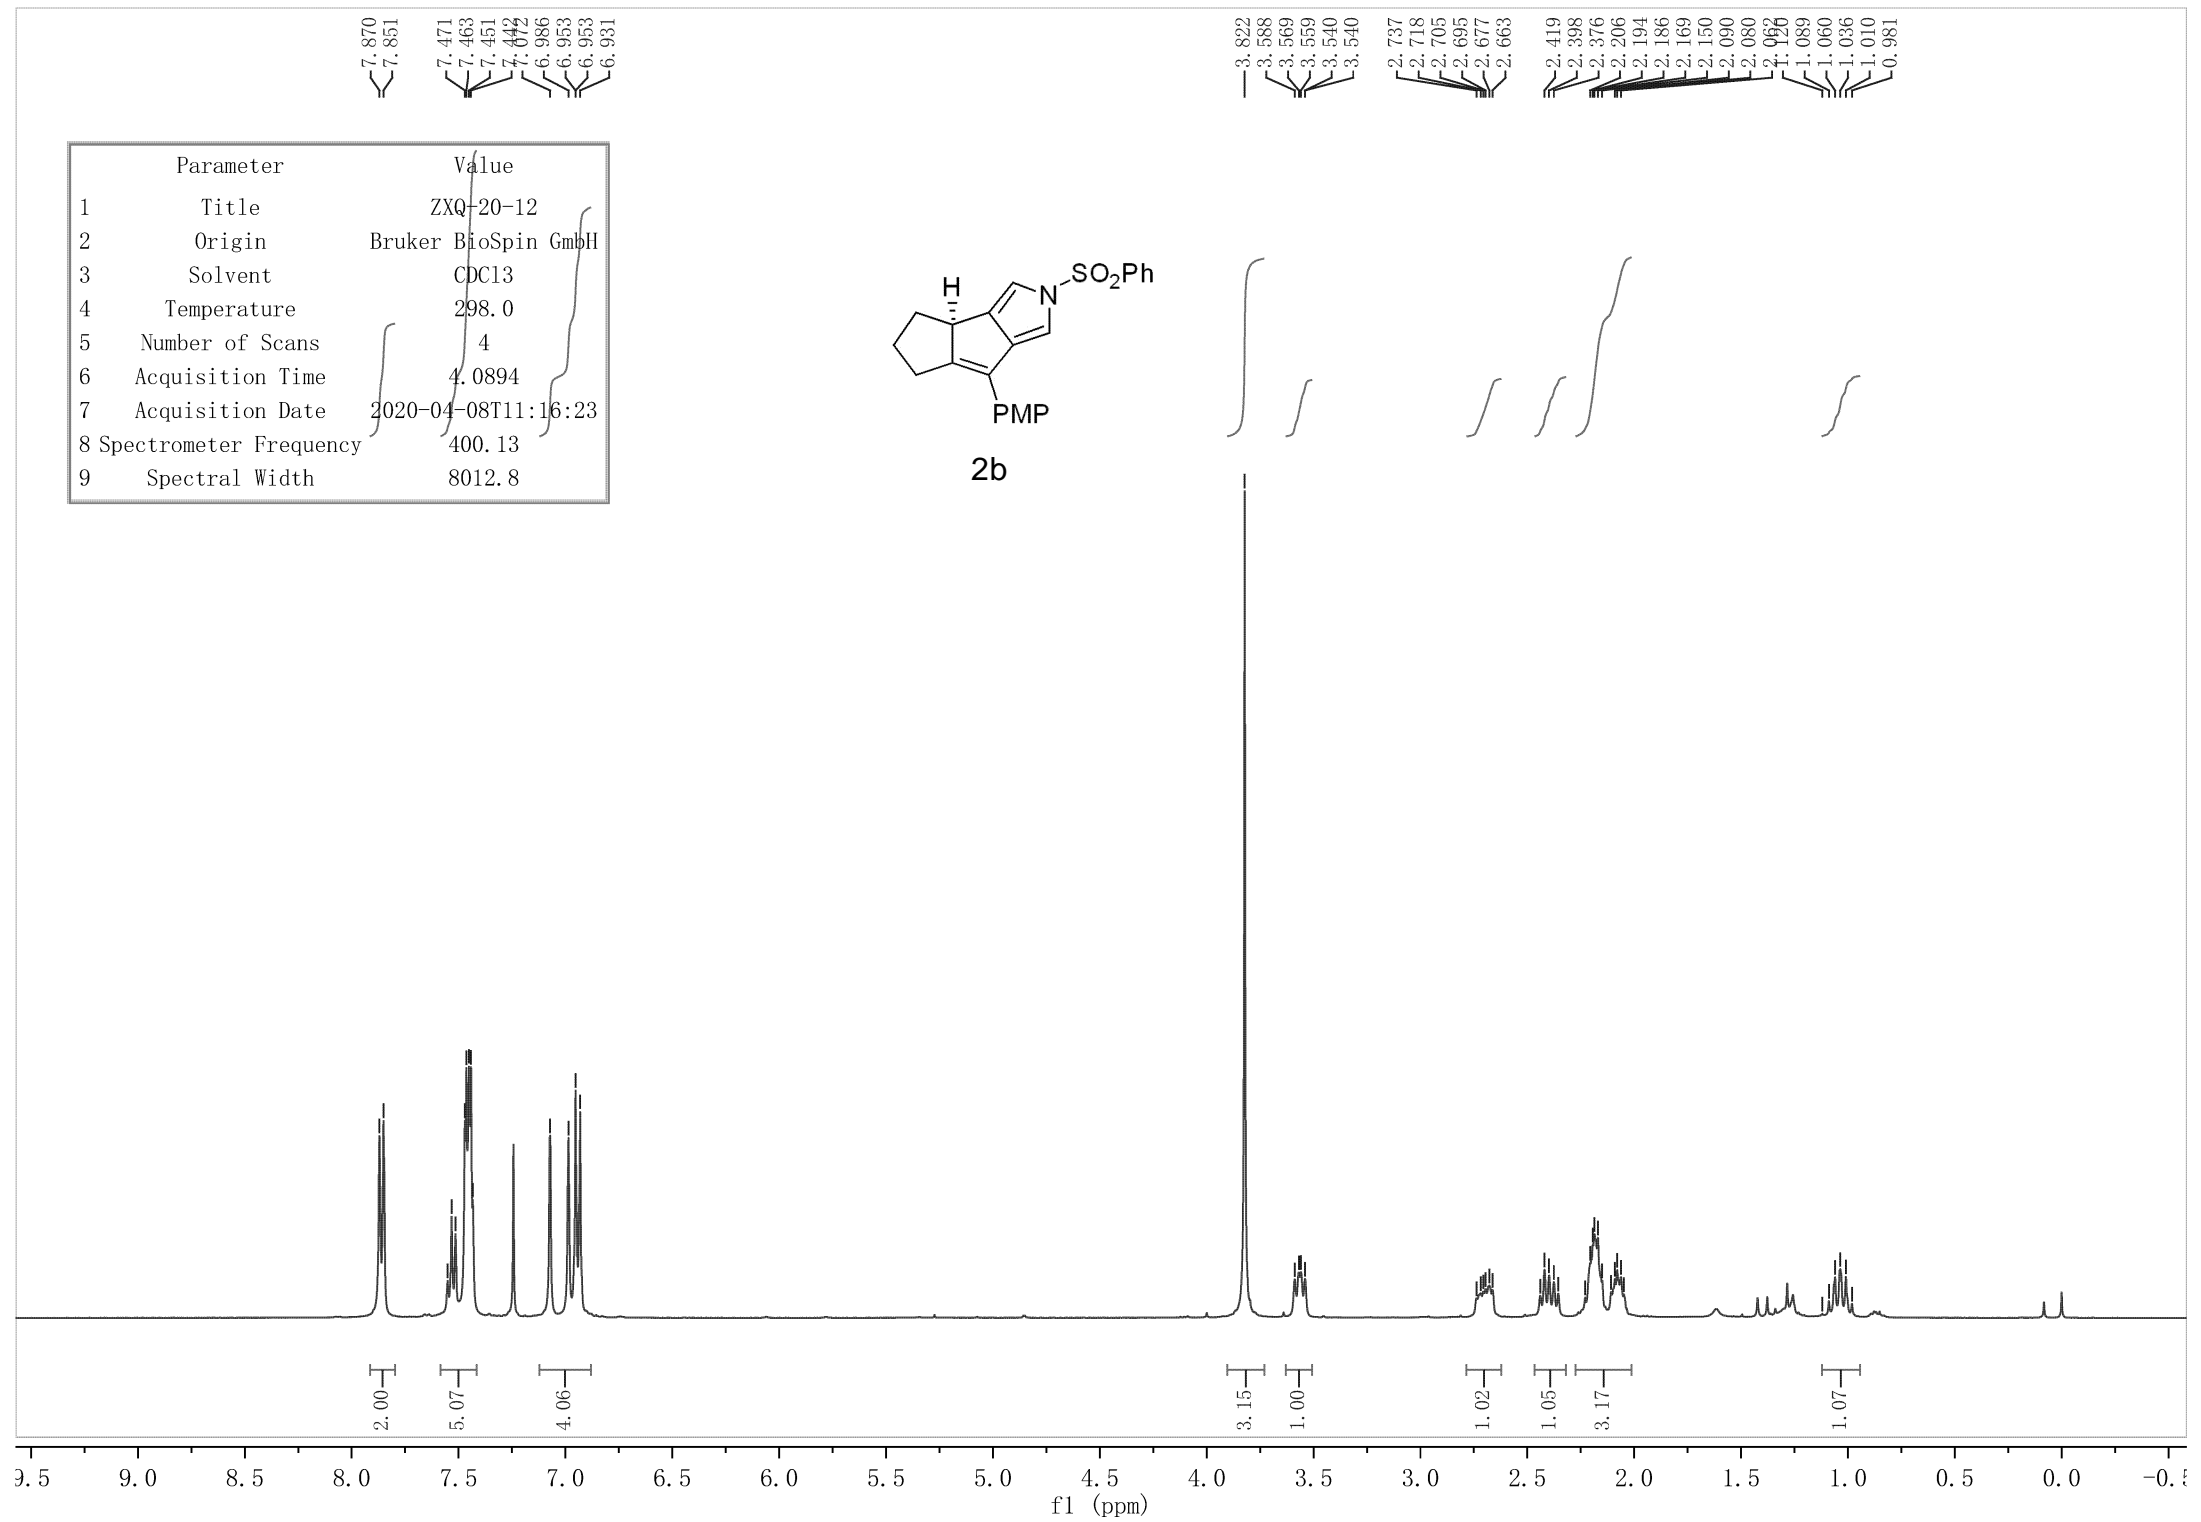

7.870  
7.851  
7.471  
7.463  
7.451  
7.442  
7.442  
6.986  
6.953  
6.953  
6.931

3.822  
3.588  
3.569  
3.559  
3.540  
3.540  
2.737  
2.718  
2.705  
2.695  
2.677  
2.663  
2.419  
2.398  
2.376  
2.206  
2.194  
2.186  
2.169  
2.150  
2.090  
2.080  
2.062  
2.062  
1.089  
1.060  
1.036  
1.010  
0.981

| Parameter                | Value               |
|--------------------------|---------------------|
| 1 Title                  | ZXQ-20-12-C         |
| 2 Origin                 | Bruker BioSpin GmbH |
| 3 Solvent                | CDC13               |
| 4 Temperature            | 300.0               |
| 5 Number of Scans        | 24                  |
| 6 Acquisition Time       | 1.3631              |
| 7 Acquisition Date       | 2020-04-08T11:17:27 |
| 8 Spectrometer Frequency | 100.61              |
| 9 Spectral Width         | 24038.5             |

158.68  
157.92

141.65  
139.38  
135.08  
133.36  
129.17  
128.41  
127.36  
127.28  
126.58

113.89  
113.28  
107.78

77.32  
77.00  
76.68

55.25  
49.61

29.55  
27.79  
24.99

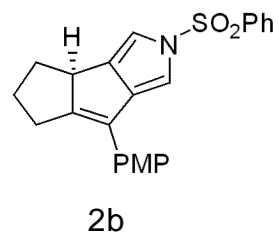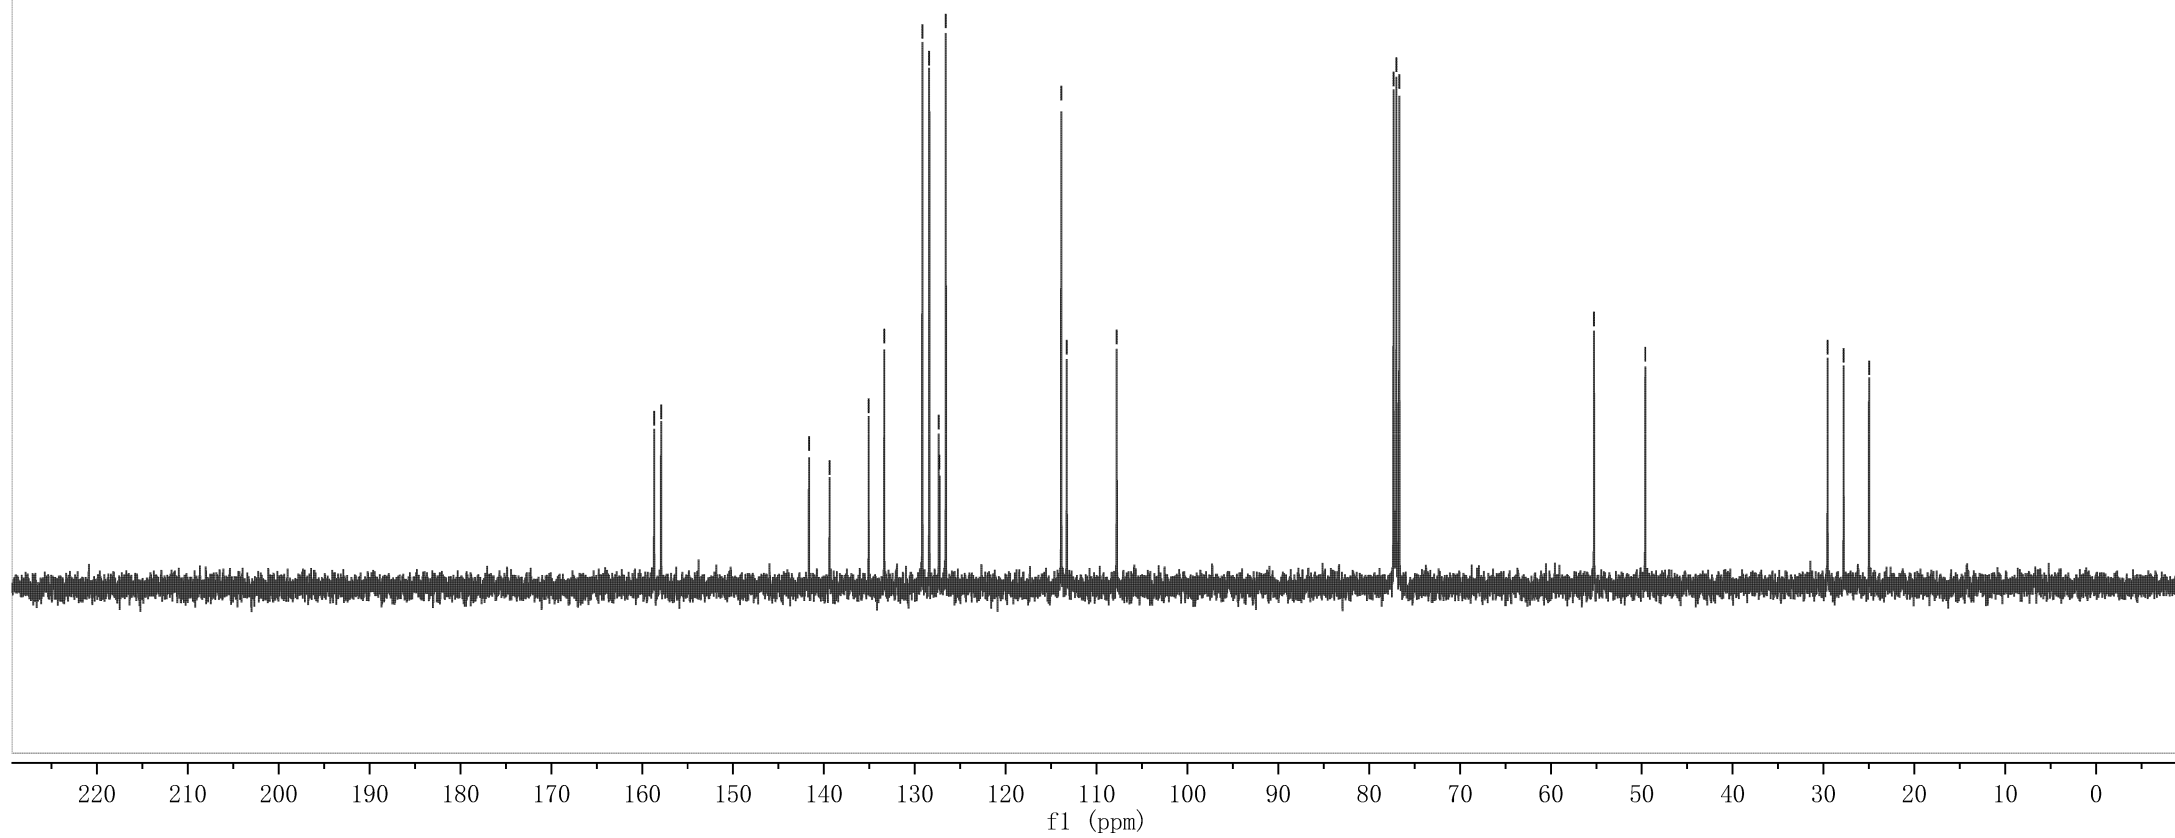

7.822  
7.815  
7.810  
7.797  
7.792  
7.785  
7.467  
7.445  
7.048  
7.045  
6.968  
6.965  
6.962  
6.955  
6.933  
6.923  
6.918  
6.906  
6.901  
6.893

3.833  
3.810  
3.590  
3.570  
3.561  
3.543  
2.746  
2.728  
2.715  
2.703  
2.686  
2.671  
2.426  
2.405  
2.217  
2.211  
2.204  
2.196  
2.190  
2.180  
2.085  
2.066  
1.118  
1.097  
1.074  
1.068  
1.047  
1.044  
1.018  
0.989  
0.972

| Parameter                | Value               |
|--------------------------|---------------------|
| 1 Title                  | ZXQ-20-204          |
| 2 Origin                 | Bruker BioSpin GmbH |
| 3 Solvent                | CDC13               |
| 4 Temperature            | 298.9               |
| 5 Number of Scans        | 7                   |
| 6 Acquisition Time       | 3.9846              |
| 7 Acquisition Date       | 2020-05-20T17:16:35 |
| 8 Spectrometer Frequency | 400.03              |
| 9 Spectral Width         | 8223.7              |

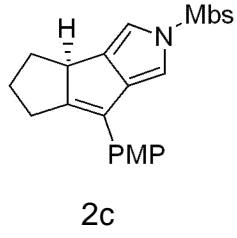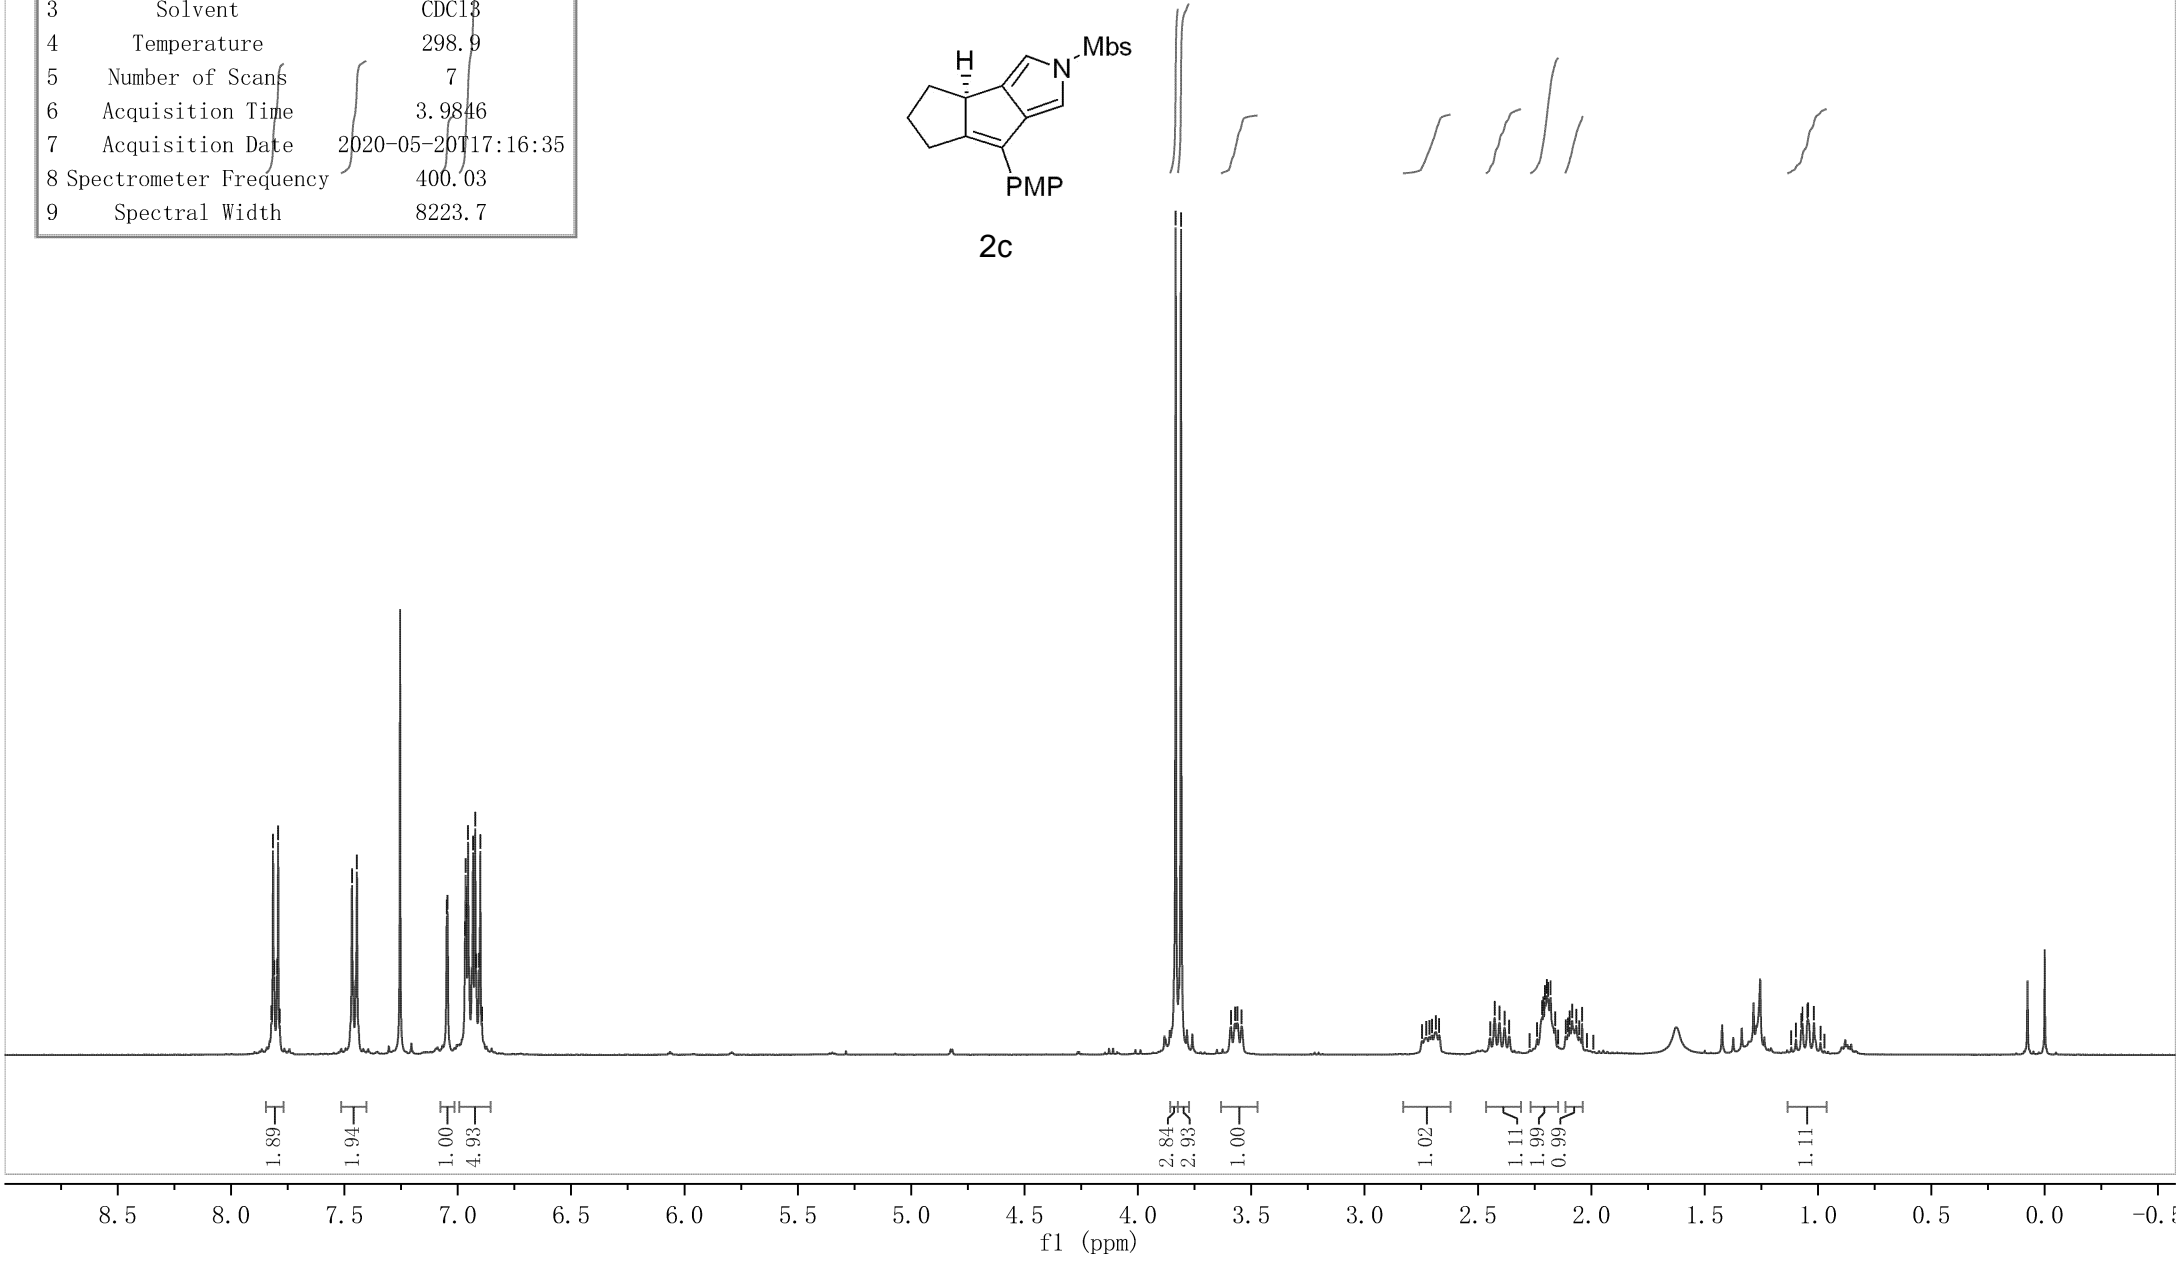

| Parameter                | Value               |
|--------------------------|---------------------|
| 1 Title                  | ZXQ-20-204-C        |
| 2 Origin                 | Bruker BioSpin GmbH |
| 3 Solvent                | CDC13               |
| 4 Temperature            | 299.3               |
| 5 Number of Scans        | 41                  |
| 6 Acquisition Time       | 1.3631              |
| 7 Acquisition Date       | 2020-05-20T17:19:05 |
| 8 Spectrometer Frequency | 100.59              |
| 9 Spectral Width         | 24038.5             |

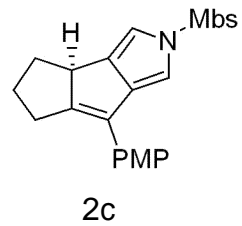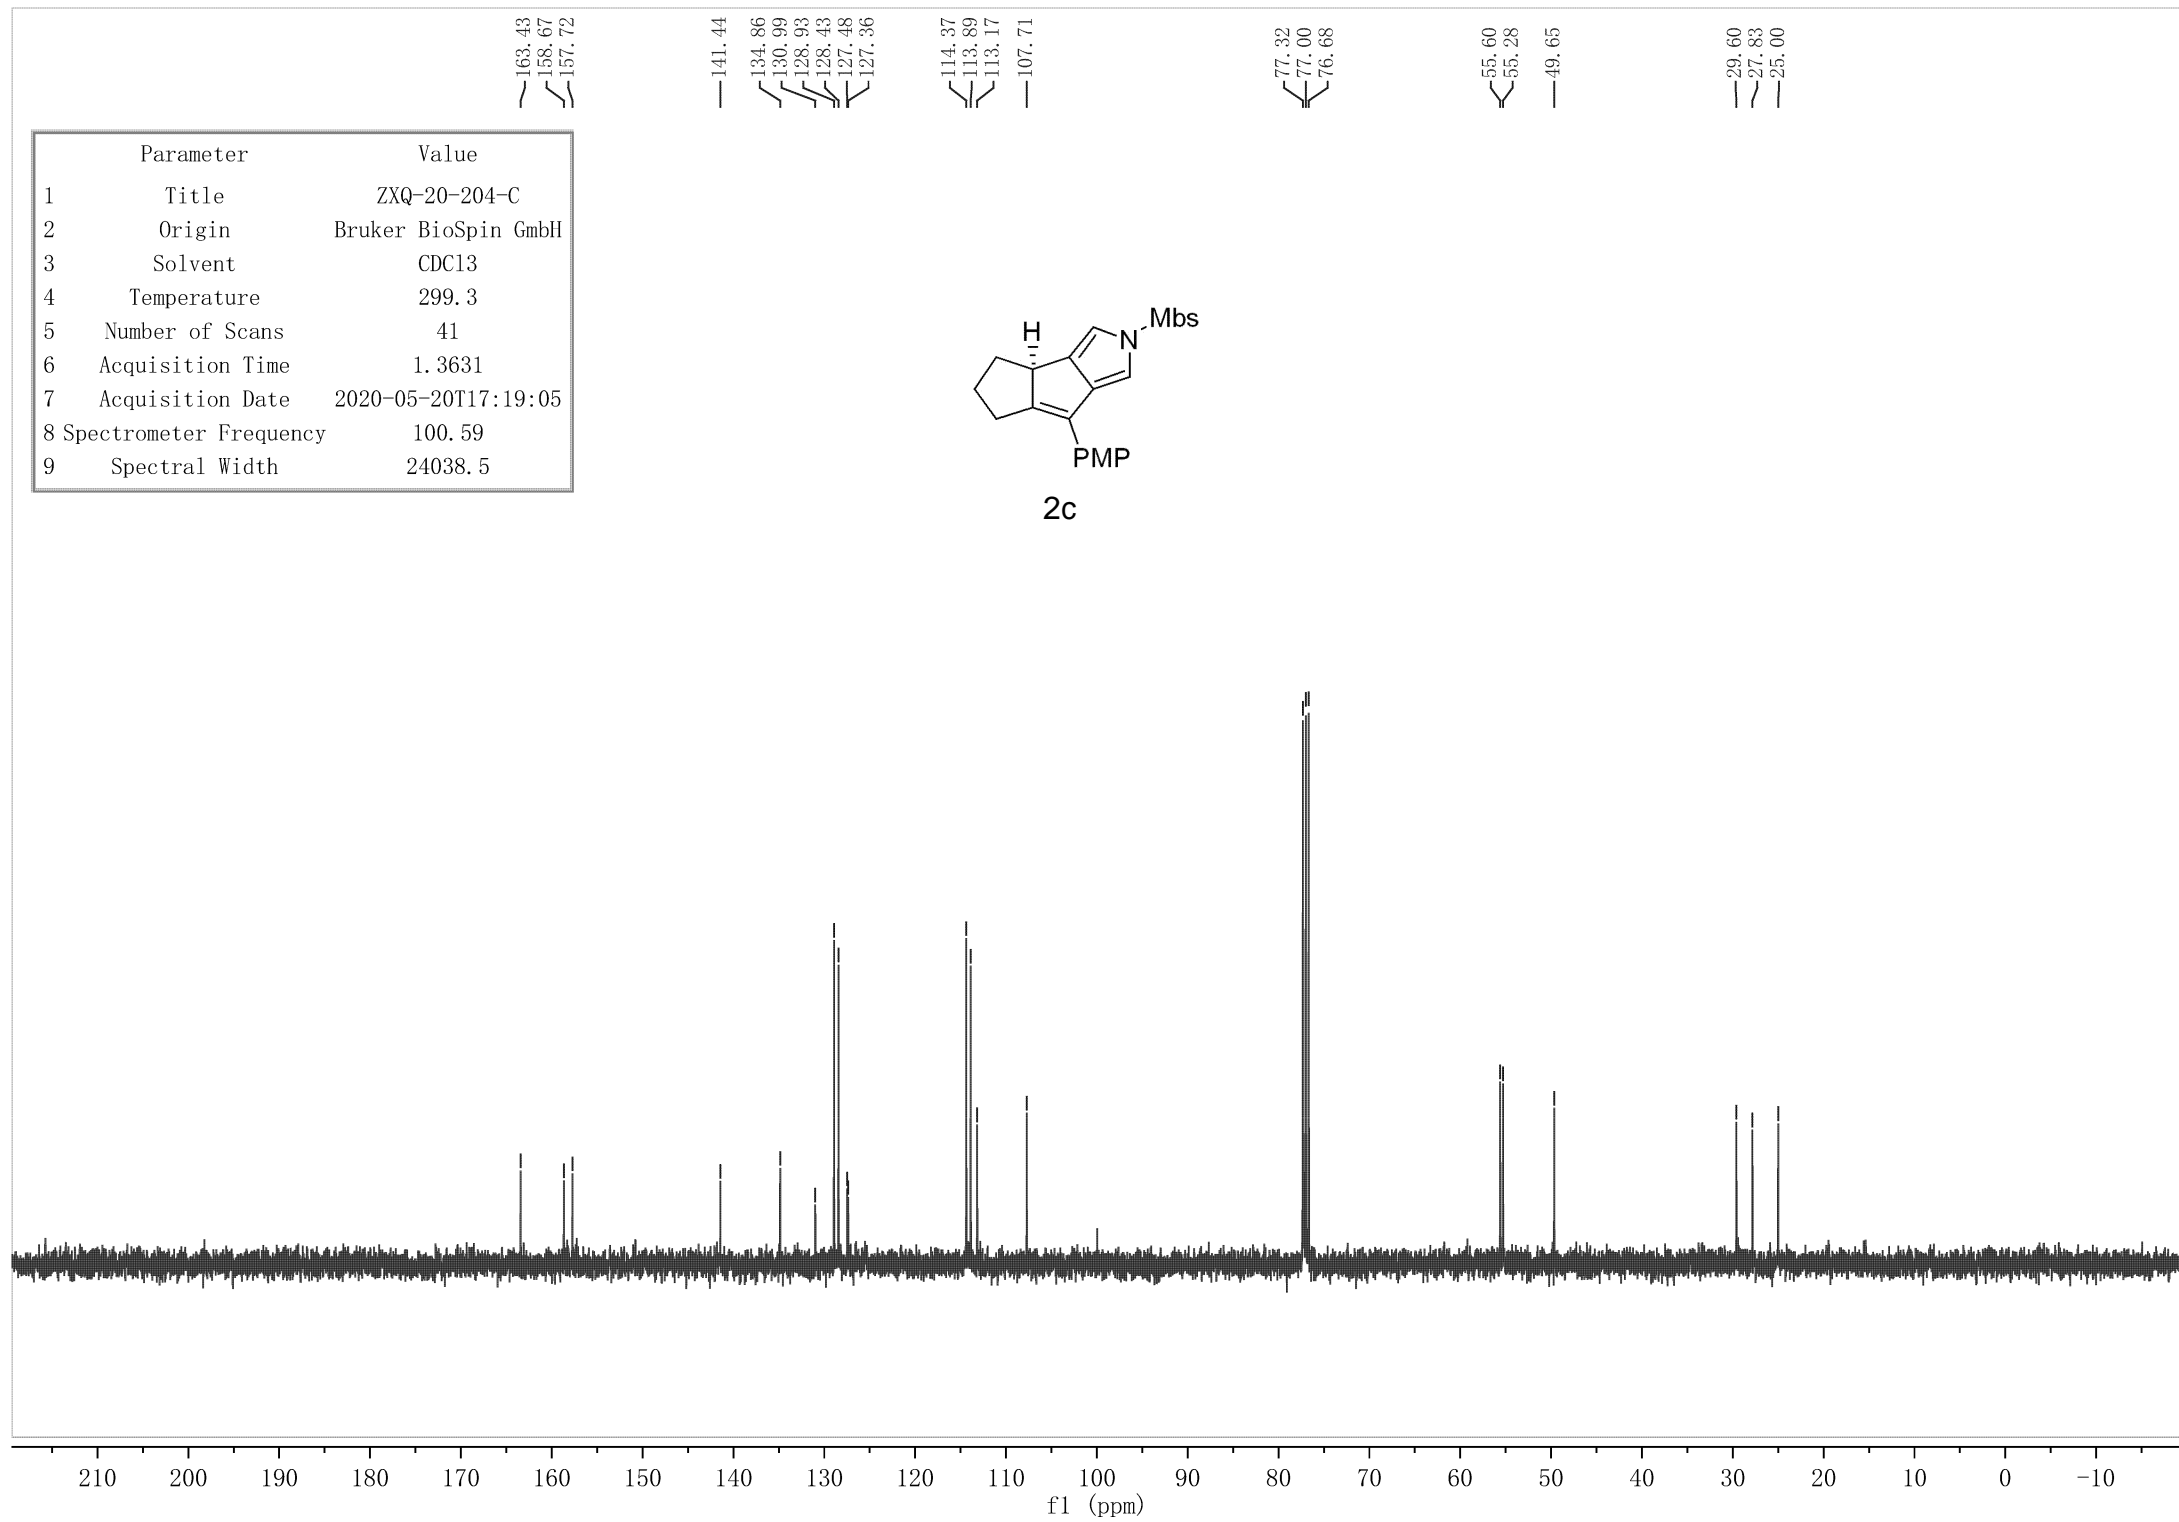

| Parameter                | Value               |
|--------------------------|---------------------|
| 1 Title                  | ZXQ-18-191          |
| 2 Origin                 | Bruker BioSpin GmbH |
| 3 Solvent                | CDCl3               |
| 4 Temperature            | 298.0               |
| 5 Number of Scans        | 10                  |
| 6 Acquisition Time       | 4.0894              |
| 7 Acquisition Date       | 2019-10-28T20:33:41 |
| 8 Spectrometer Frequency | 400.13              |
| 9 Spectral Width         | 8012.8              |

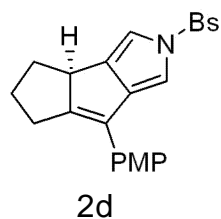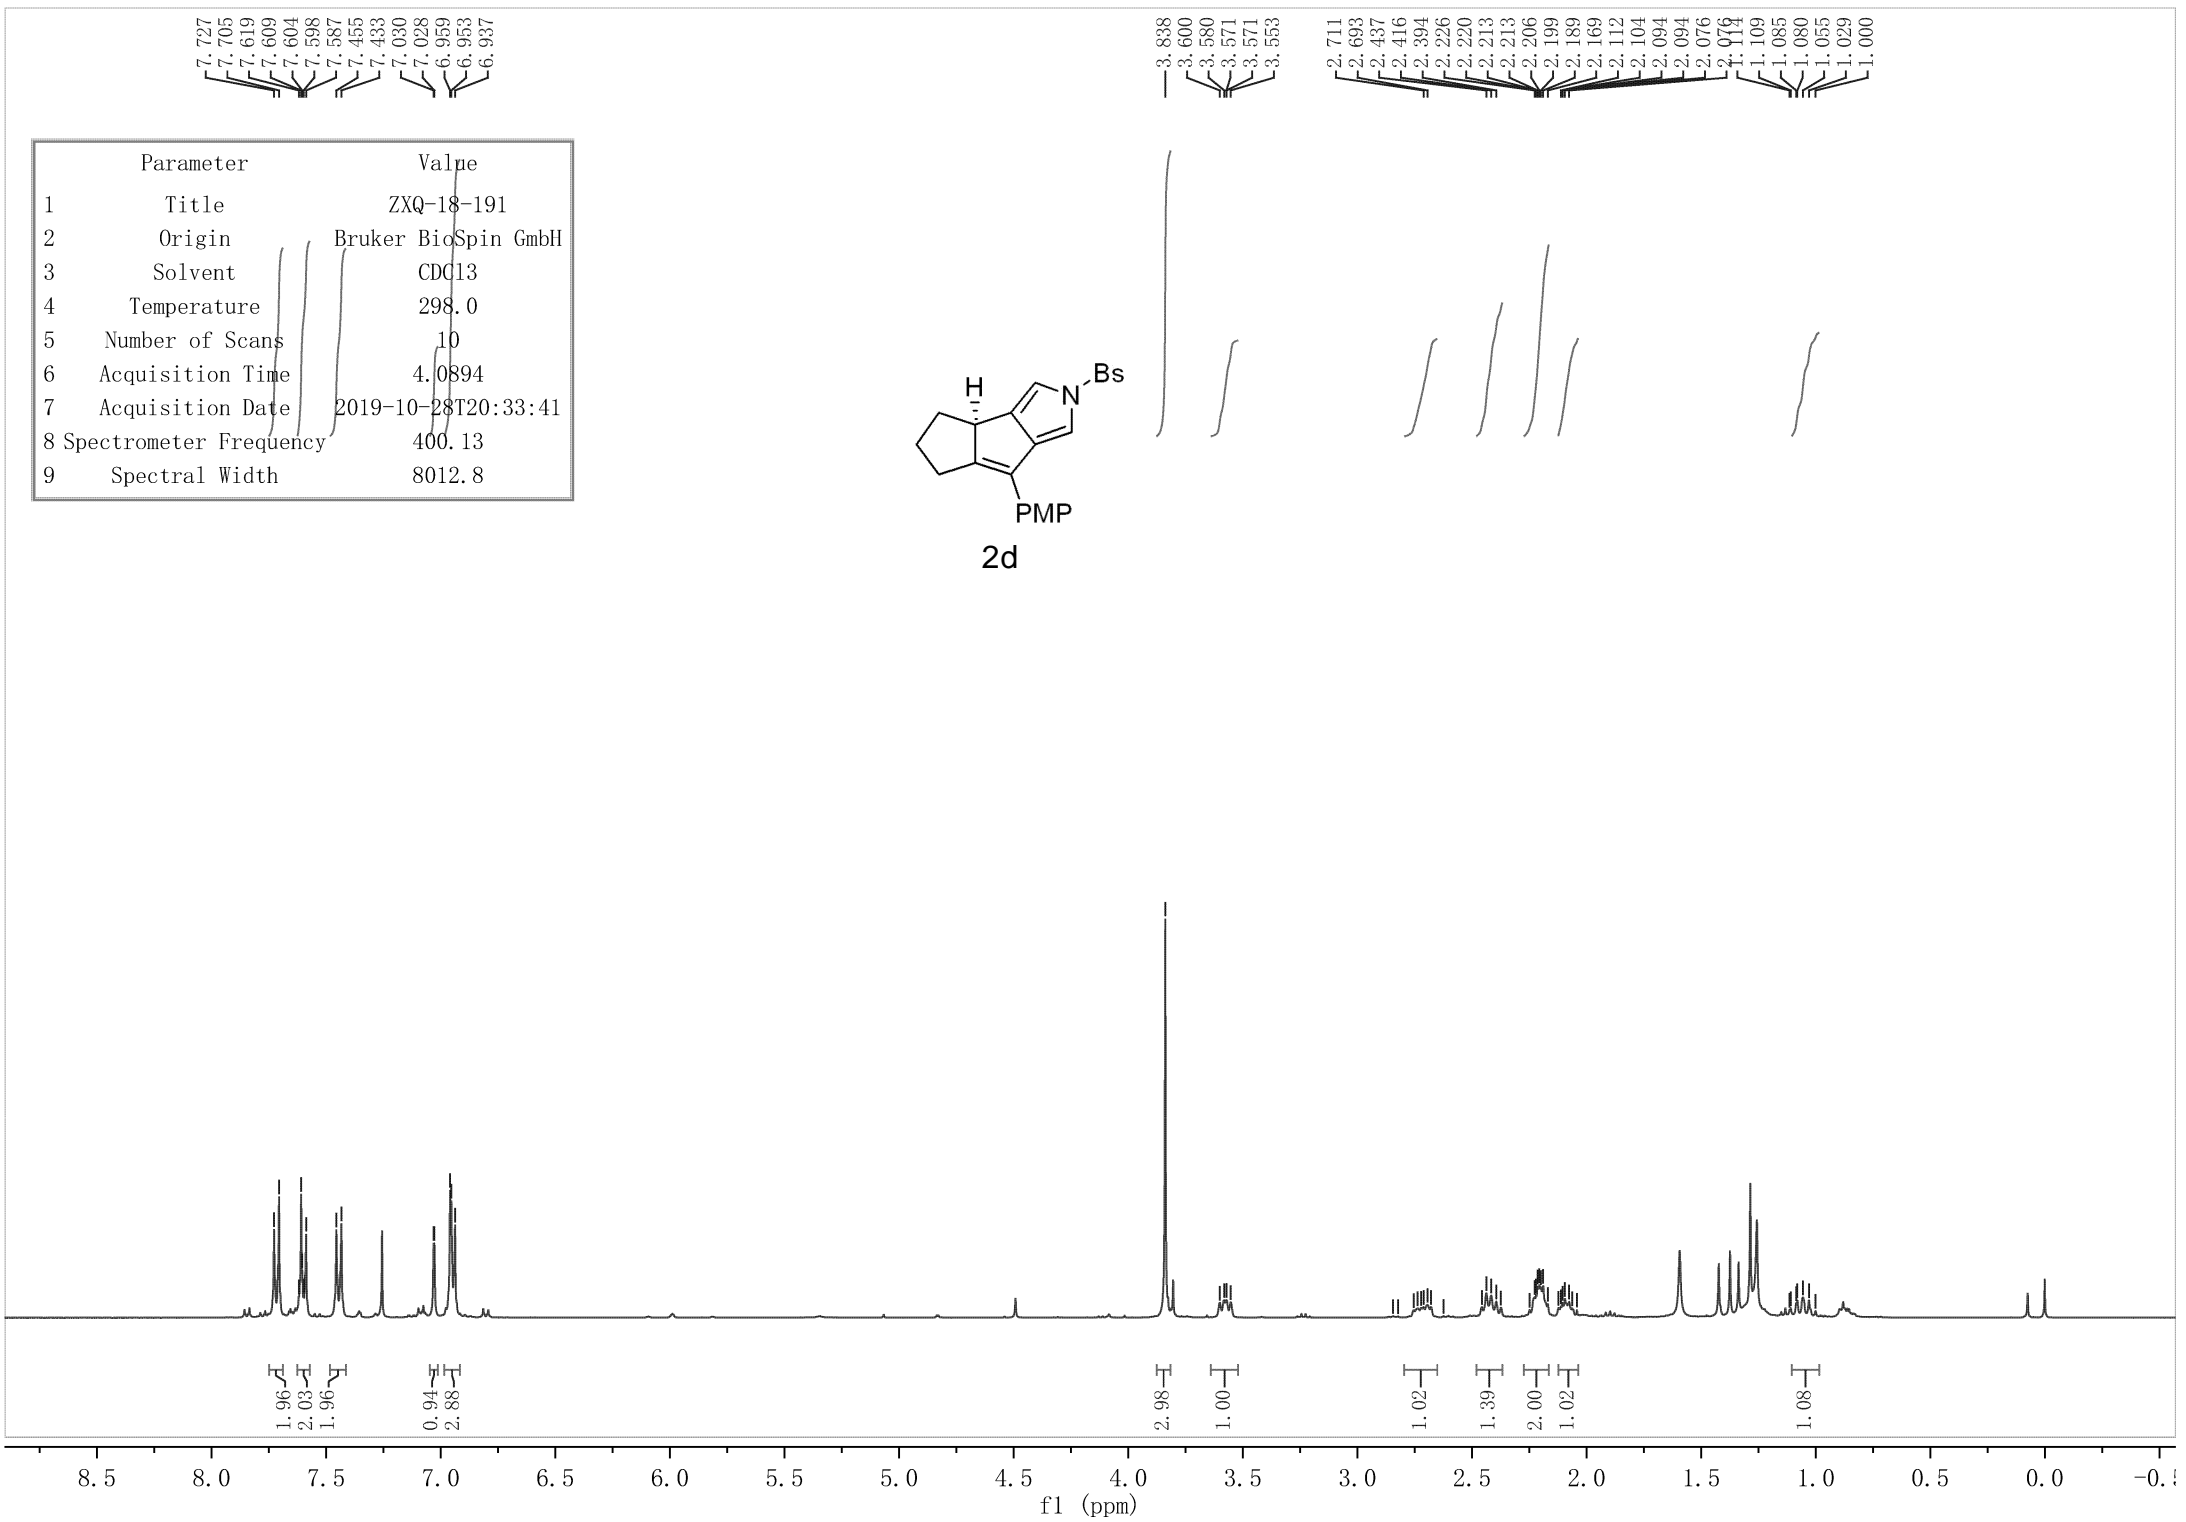

| Parameter                | Value               |
|--------------------------|---------------------|
| 1 Title                  | ZXQ-18-191-C-       |
| 2 Origin                 | Bruker BioSpin GmbH |
| 3 Solvent                | CDC13               |
| 4 Temperature            | 300.0               |
| 5 Number of Scans        | 102                 |
| 6 Acquisition Time       | 1.3631              |
| 7 Acquisition Date       | 2019-10-28T20:37:15 |
| 8 Spectrometer Frequency | 100.61              |
| 9 Spectral Width         | 24038.5             |

158.77  
 156.24  
 142.13  
 138.34  
 135.55  
 132.53  
 128.57  
 128.44  
 128.14  
 127.31  
 127.27  
 113.95  
 113.27  
 107.72  
 77.32  
 77.00  
 76.68  
 55.30  
 49.63  
 29.56  
 27.79  
 25.02

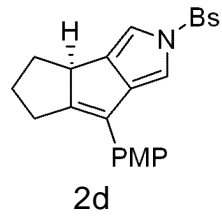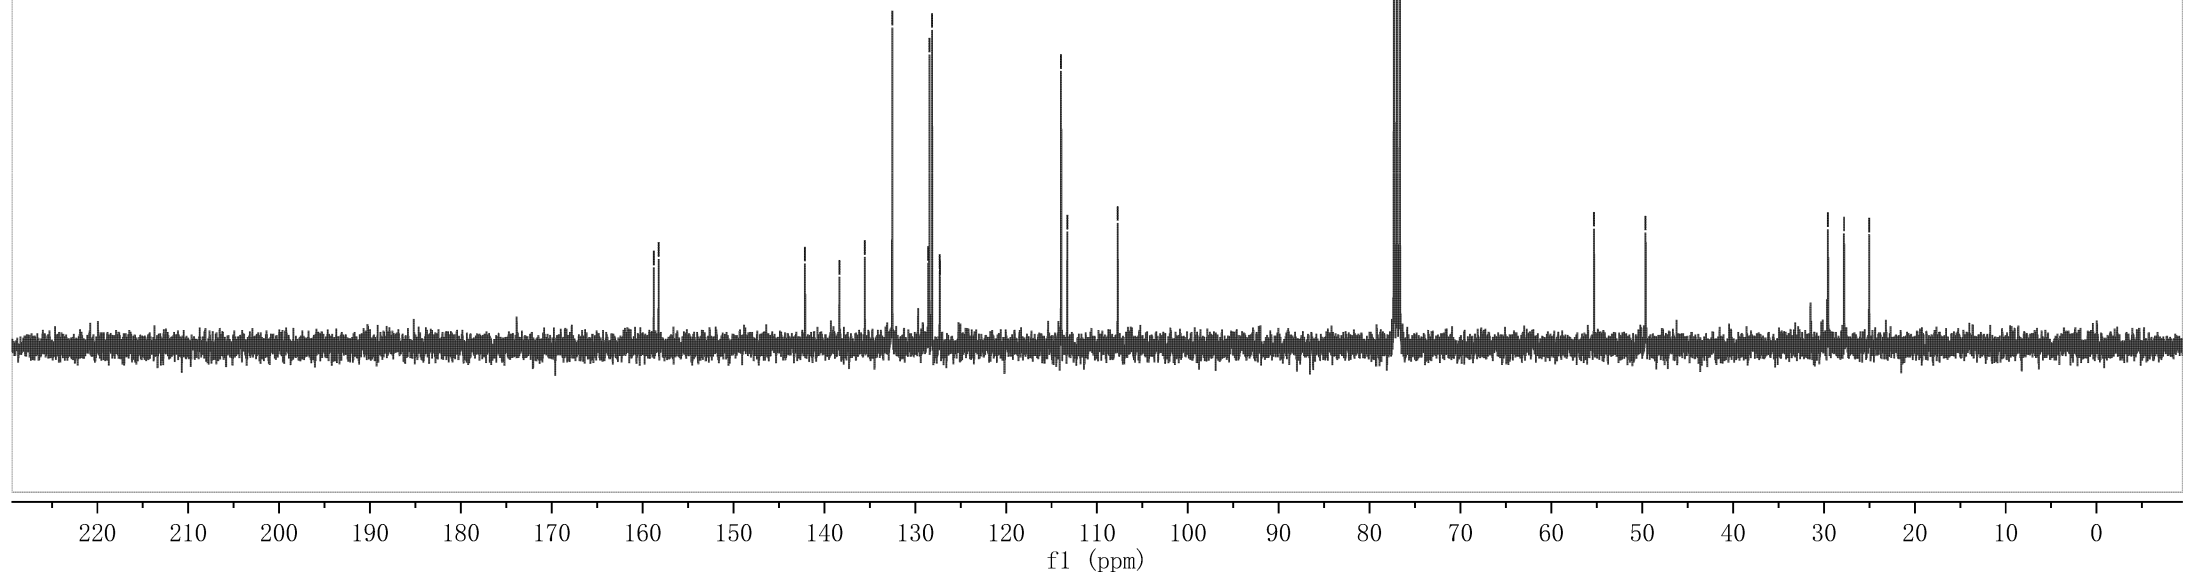



| Parameter                | Value               |
|--------------------------|---------------------|
| 1 Title                  | ZXQ-18-190          |
| 2 Origin                 | Bruker BioSpin GmbH |
| 3 Solvent                | CDCl3               |
| 4 Temperature            | 298.0               |
| 5 Number of Scans        | 10                  |
| 6 Acquisition Time       | 4.0894              |
| 7 Acquisition Date       | 2019-10-28T20:28:47 |
| 8 Spectrometer Frequency | 400.13              |
| 9 Spectral Width         | 8012.8              |

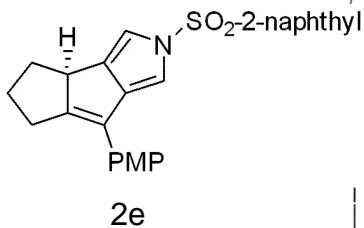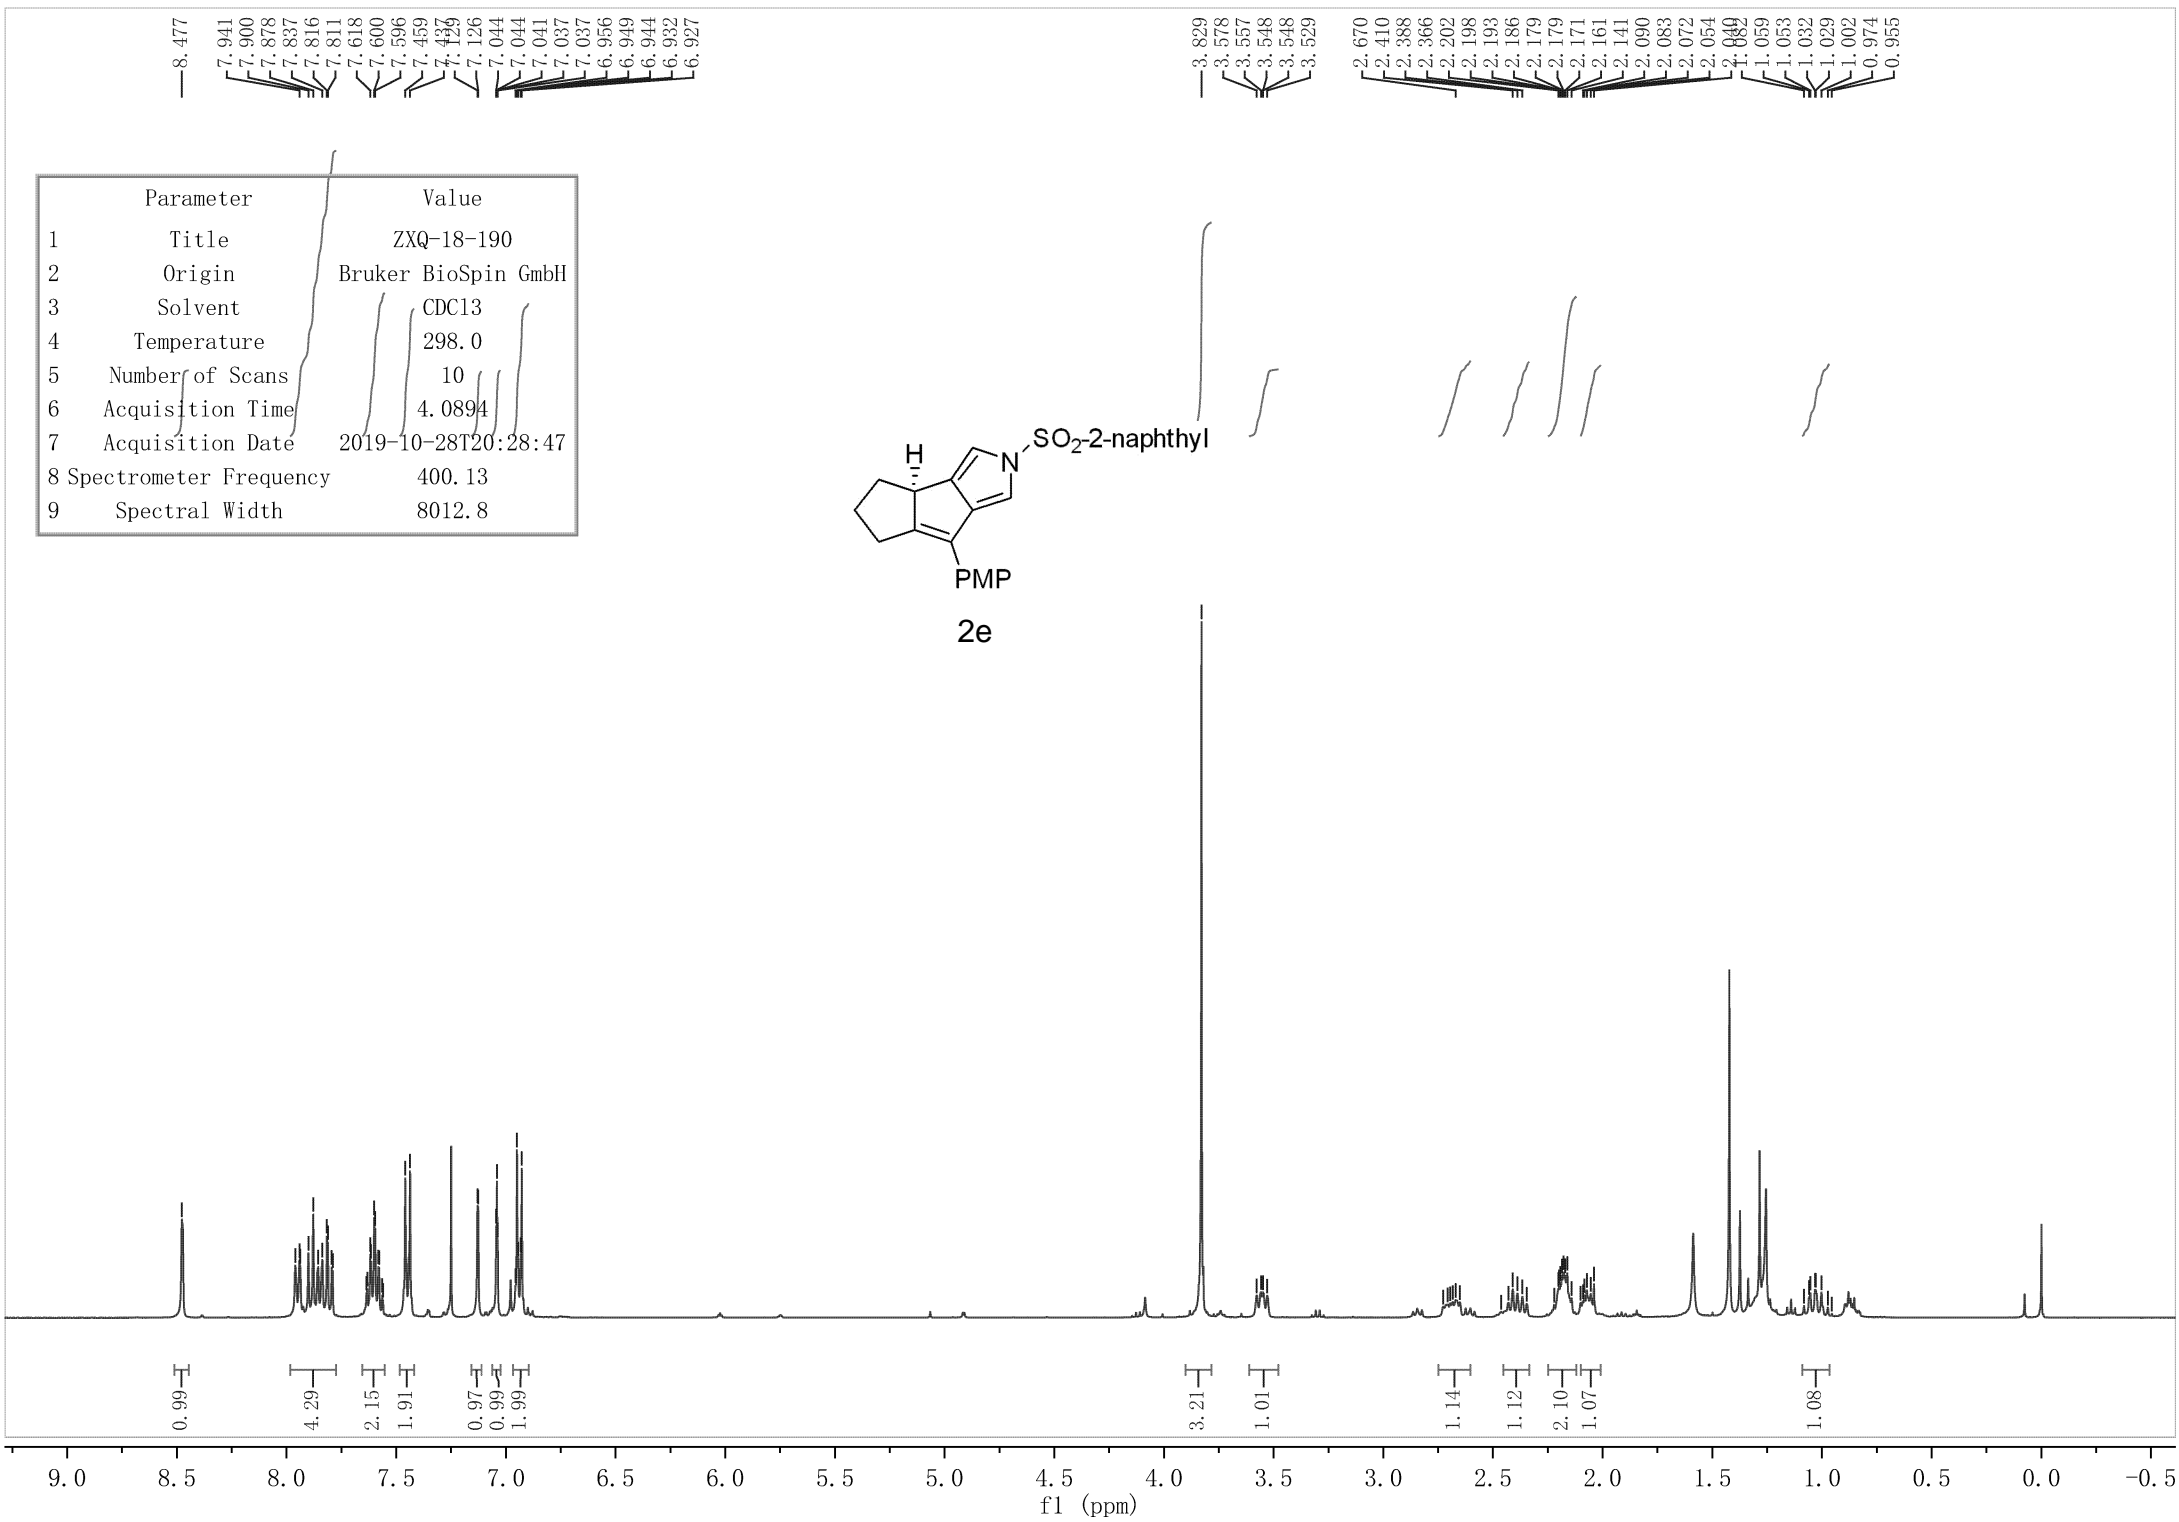

| Parameter                | Value               |
|--------------------------|---------------------|
| 1 Title                  | ZXQ-18-190-C-       |
| 2 Origin                 | Bruker BioSpin GmbH |
| 3 Solvent                | CDC13               |
| 4 Temperature            | 300.0               |
| 5 Number of Scans        | 131                 |
| 6 Acquisition Time       | 1.3631              |
| 7 Acquisition Date       | 2019-10-28T20:44:02 |
| 8 Spectrometer Frequency | 100.61              |
| 9 Spectral Width         | 24038.5             |

158.71 157.88 141.66 129.58 129.40 129.20 128.45 128.20 127.90 127.66 121.65 113.91 113.33 107.85 77.32 77.00 76.68 55.30 49.64 29.57 27.81 24.99

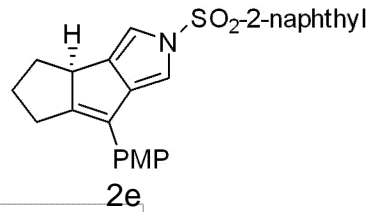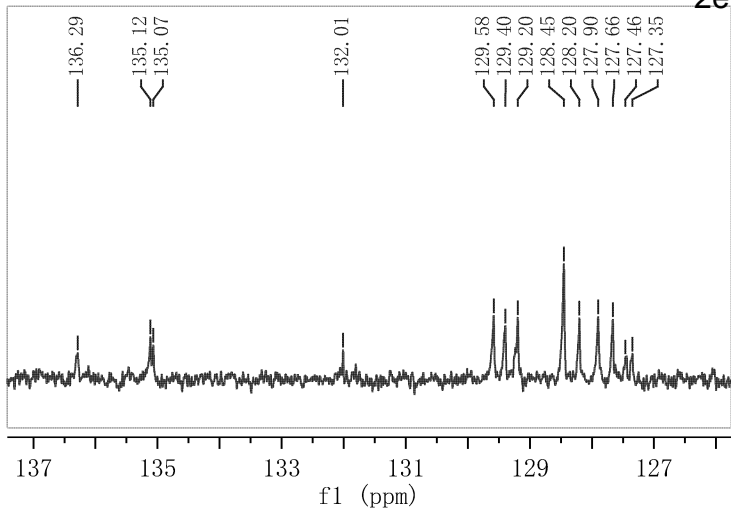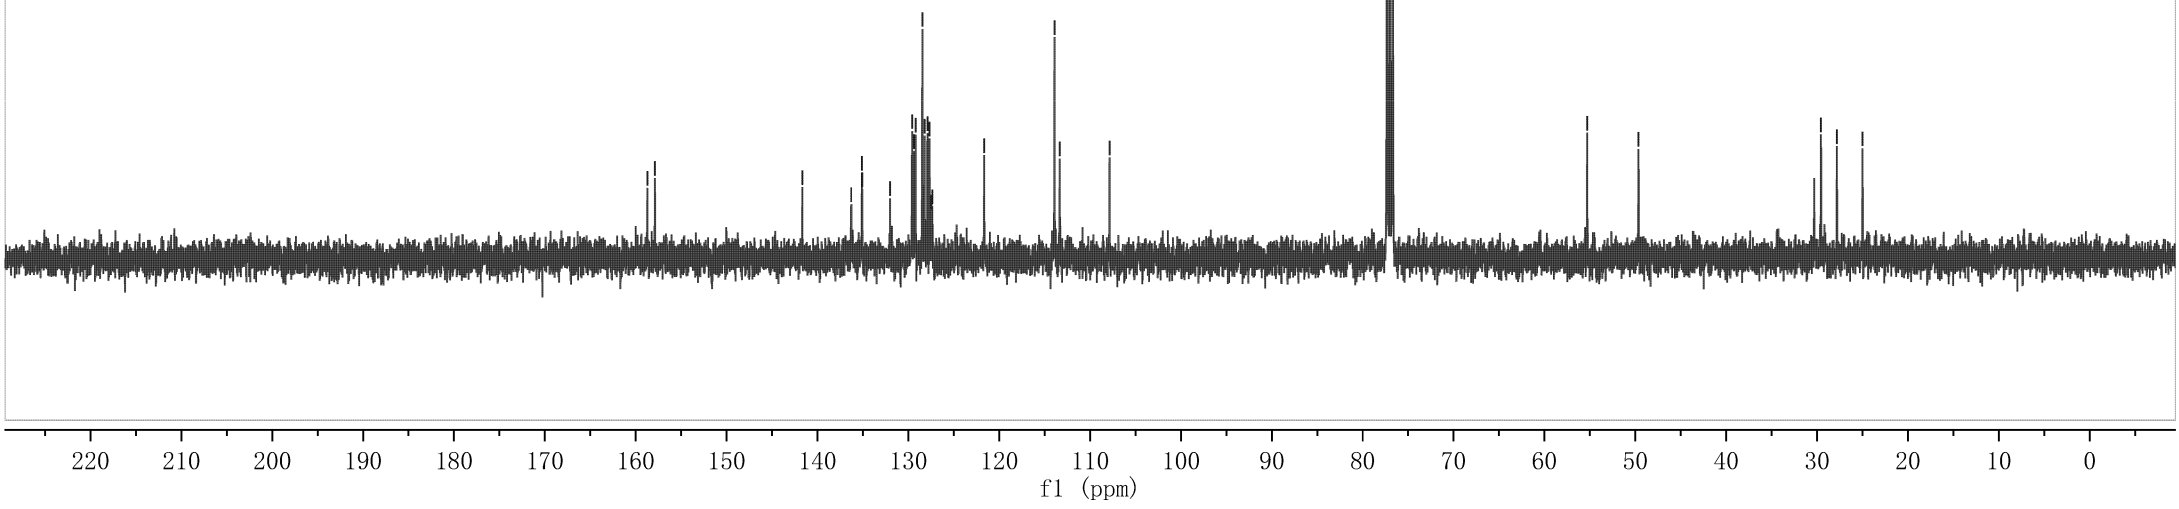

7.633  
7.569  
7.560  
7.469  
7.450  
7.061  
7.018  
6.987  
6.961  
6.941

3.837  
3.617  
3.591  
3.572

2.739  
2.715  
2.700  
2.441  
2.420  
2.420  
2.397  
2.378  
2.205  
2.205  
2.102

1.153  
1.116  
1.090  
1.090  
1.064  
1.039  
1.012

| Parameter                | Value               |
|--------------------------|---------------------|
| 1 Title                  | ZXQ-20-7            |
| 2 Origin                 | Bruker BioSpin GmbH |
| 3 Solvent                | CDC13               |
| 4 Temperature            | 298.0               |
| 5 Number of Scans        | 13                  |
| 6 Acquisition Time       | 4.0894              |
| 7 Acquisition Date       | 2020-04-04T18:19:54 |
| 8 Spectrometer Frequency | 400.13              |
| 9 Spectral Width         | 8012.8              |

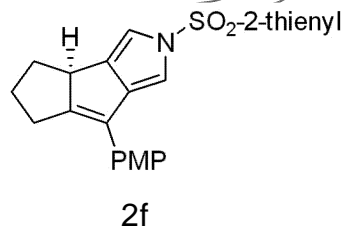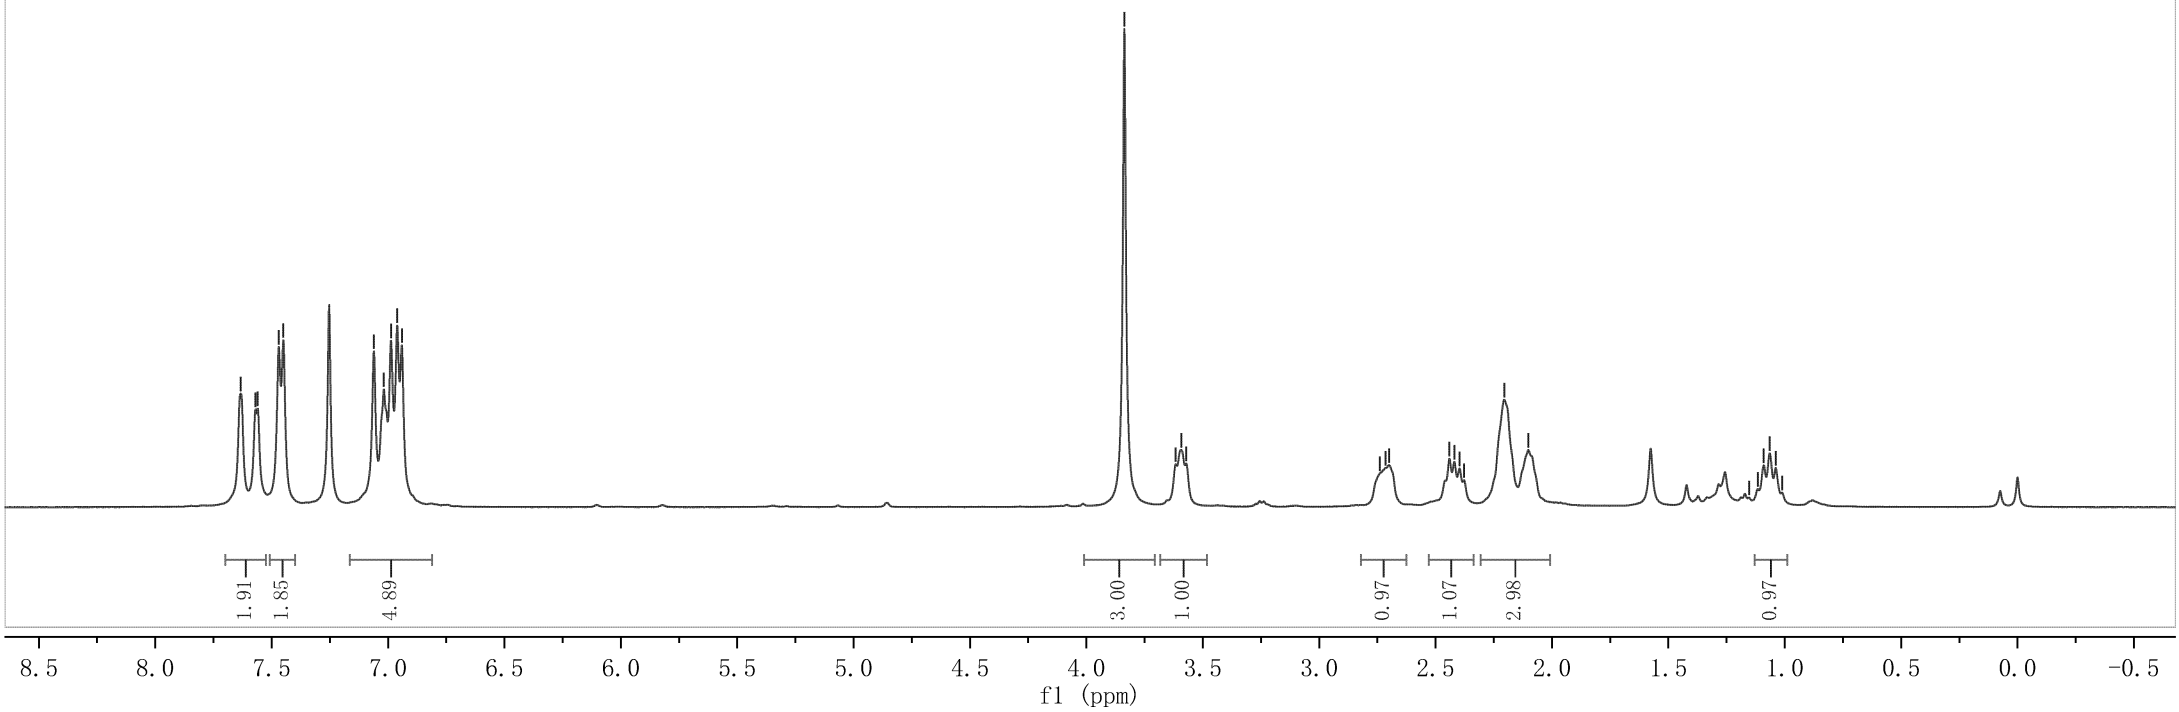

| Parameter                | Value               |
|--------------------------|---------------------|
| 1 Title                  | ZXQ-20-7-C          |
| 2 Origin                 | Bruker BioSpin GmbH |
| 3 Solvent                | CDC13               |
| 4 Temperature            | 300.0               |
| 5 Number of Scans        | 72                  |
| 6 Acquisition Time       | 1.3631              |
| 7 Acquisition Date       | 2020-04-04T18:21:46 |
| 8 Spectrometer Frequency | 100.61              |
| 9 Spectral Width         | 24038.5             |

158.74  
158.20

142.03  
139.77  
135.45  
133.06  
132.77  
128.45  
127.33

113.93  
113.33  
107.75

77.32  
77.00  
76.68

55.30  
49.63

29.55  
27.81  
25.05

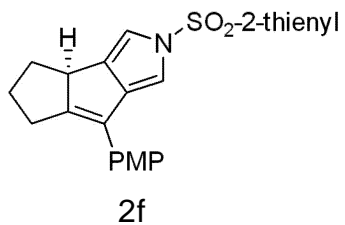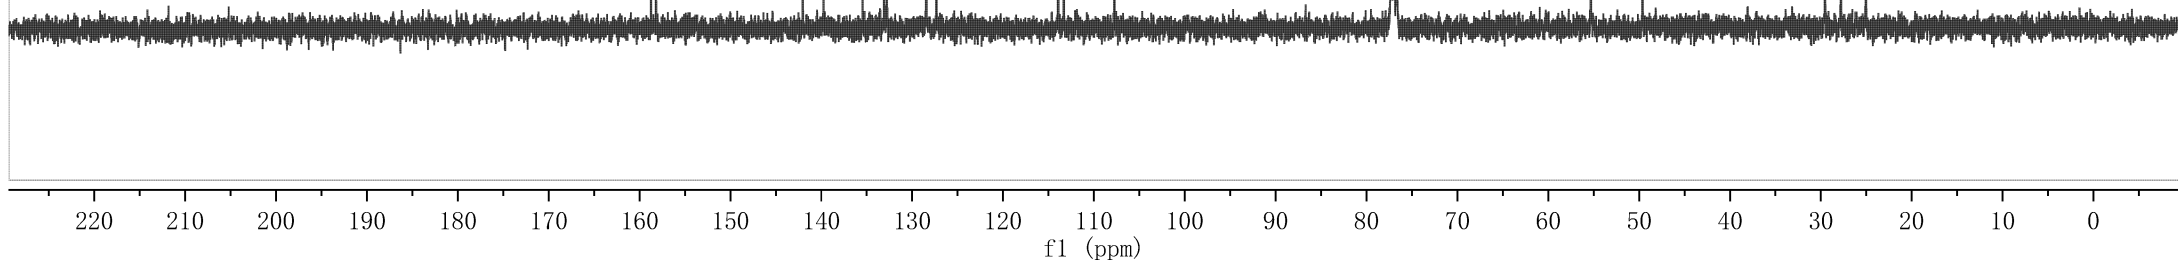

7.756  
7.735  
7.487  
7.465  
7.359  
7.359  
7.339  
7.339  
7.319  
7.283  
7.253  
7.239  
7.233  
7.233  
7.233  
7.127  
7.118  
7.108  
7.090  
7.047  
7.024  
7.000  
6.983

3.603  
3.583  
3.574  
3.555  
2.743  
2.726  
2.711  
2.701  
2.684  
2.668  
2.437  
2.416  
2.403  
2.394  
2.360  
2.221  
2.208  
2.200  
2.184  
2.164  
2.104  
2.094  
2.076  
1.074  
1.049  
1.023  
0.994

| Parameter                | Value               |
|--------------------------|---------------------|
| 1 Title                  | ZXQ-19-69           |
| 2 Origin                 | Bruker BioSpin GmbH |
| 3 Solvent                | CDCl3               |
| 4 Temperature            | 298.0               |
| 5 Number of Scans        | 7                   |
| 6 Acquisition Time       | 4.0894              |
| 7 Acquisition Date       | 2019-12-03T16:33:17 |
| 8 Spectrometer Frequency | 400.13              |
| 9 Spectral Width         | 8012.8              |

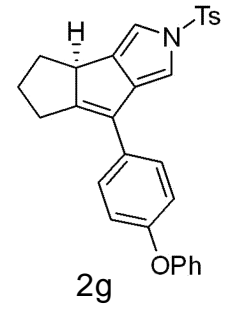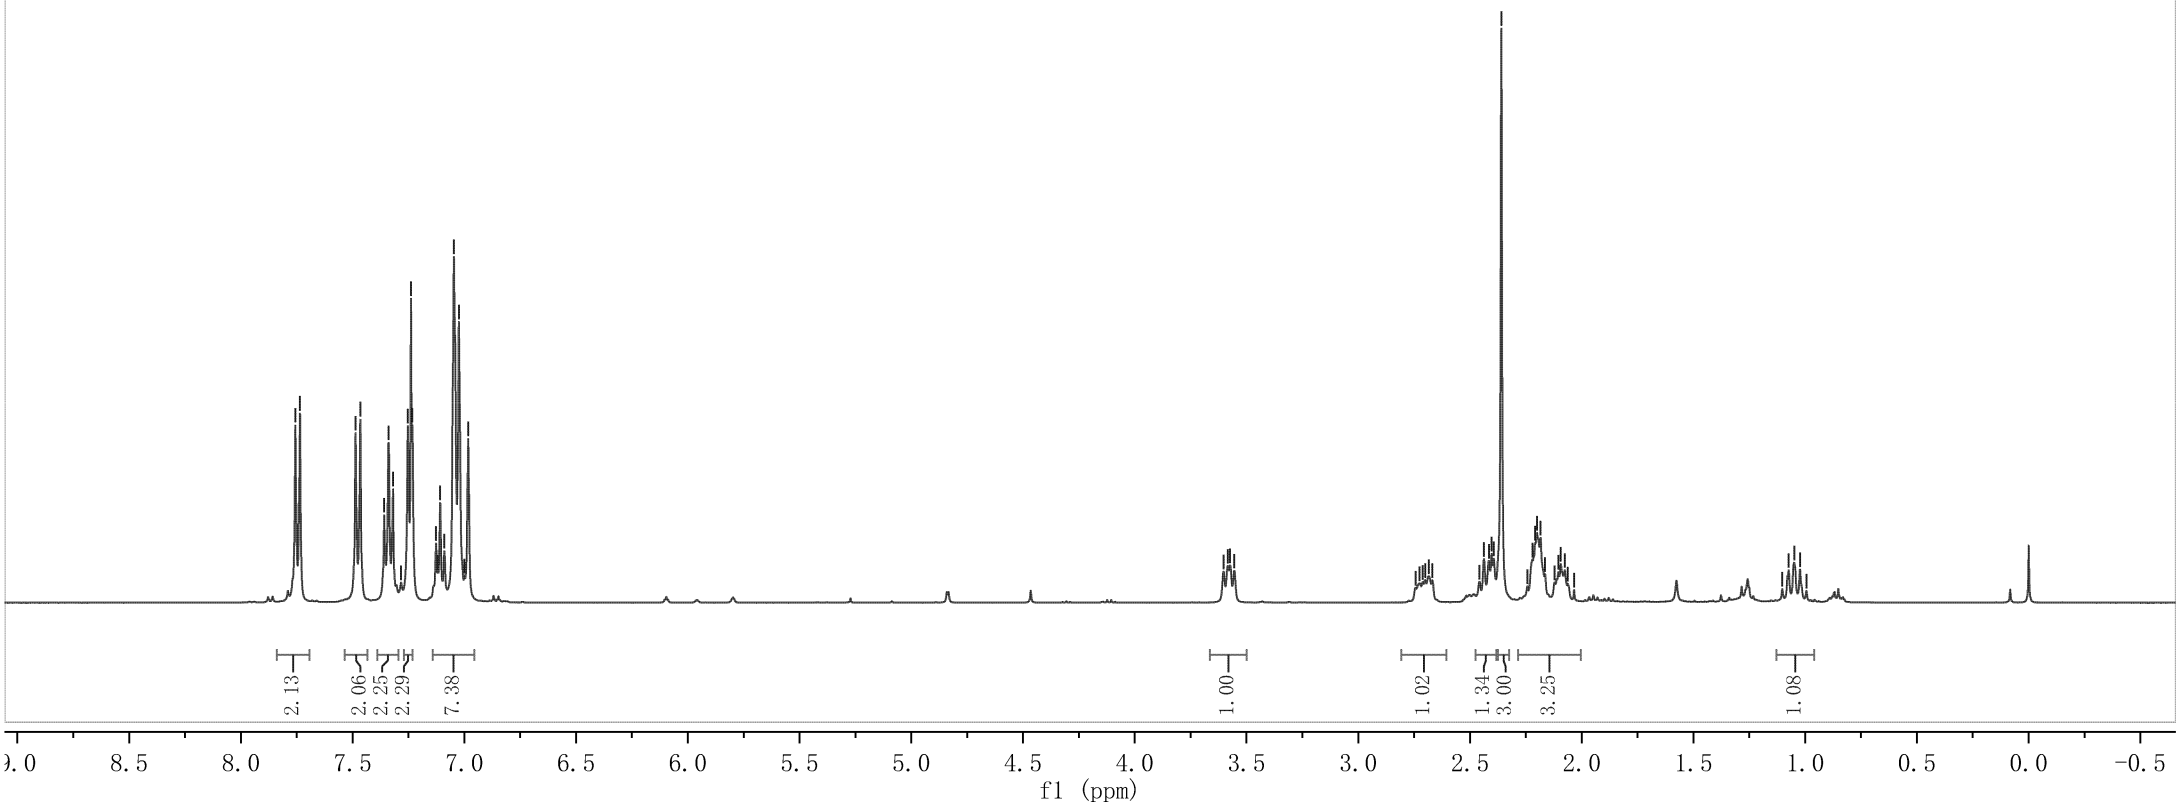

| Parameter                | Value               |
|--------------------------|---------------------|
| 1 Title                  | ZXQ-19-69-C         |
| 2 Origin                 | Bruker BioSpin GmbH |
| 3 Solvent                | CDC13               |
| 4 Temperature            | 300.0               |
| 5 Number of Scans        | 18                  |
| 6 Acquisition Time       | 1.3631              |
| 7 Acquisition Date       | 2019-12-03T16:34:42 |
| 8 Spectrometer Frequency | 100.61              |
| 9 Spectral Width         | 24038.5             |

158.90 157.03 156.31 144.43 141.29 136.47 134.77 129.80 129.74 129.74 128.59 126.69 123.37 118.96 118.71 113.30 107.77 77.32 77.00 76.68 49.76 29.57 27.81 25.03 21.52

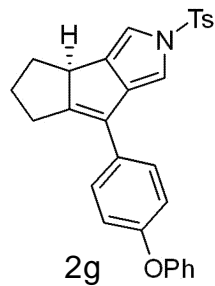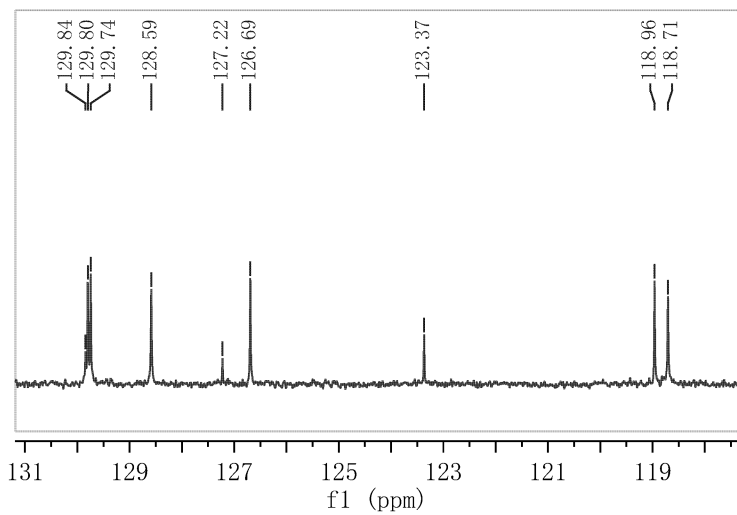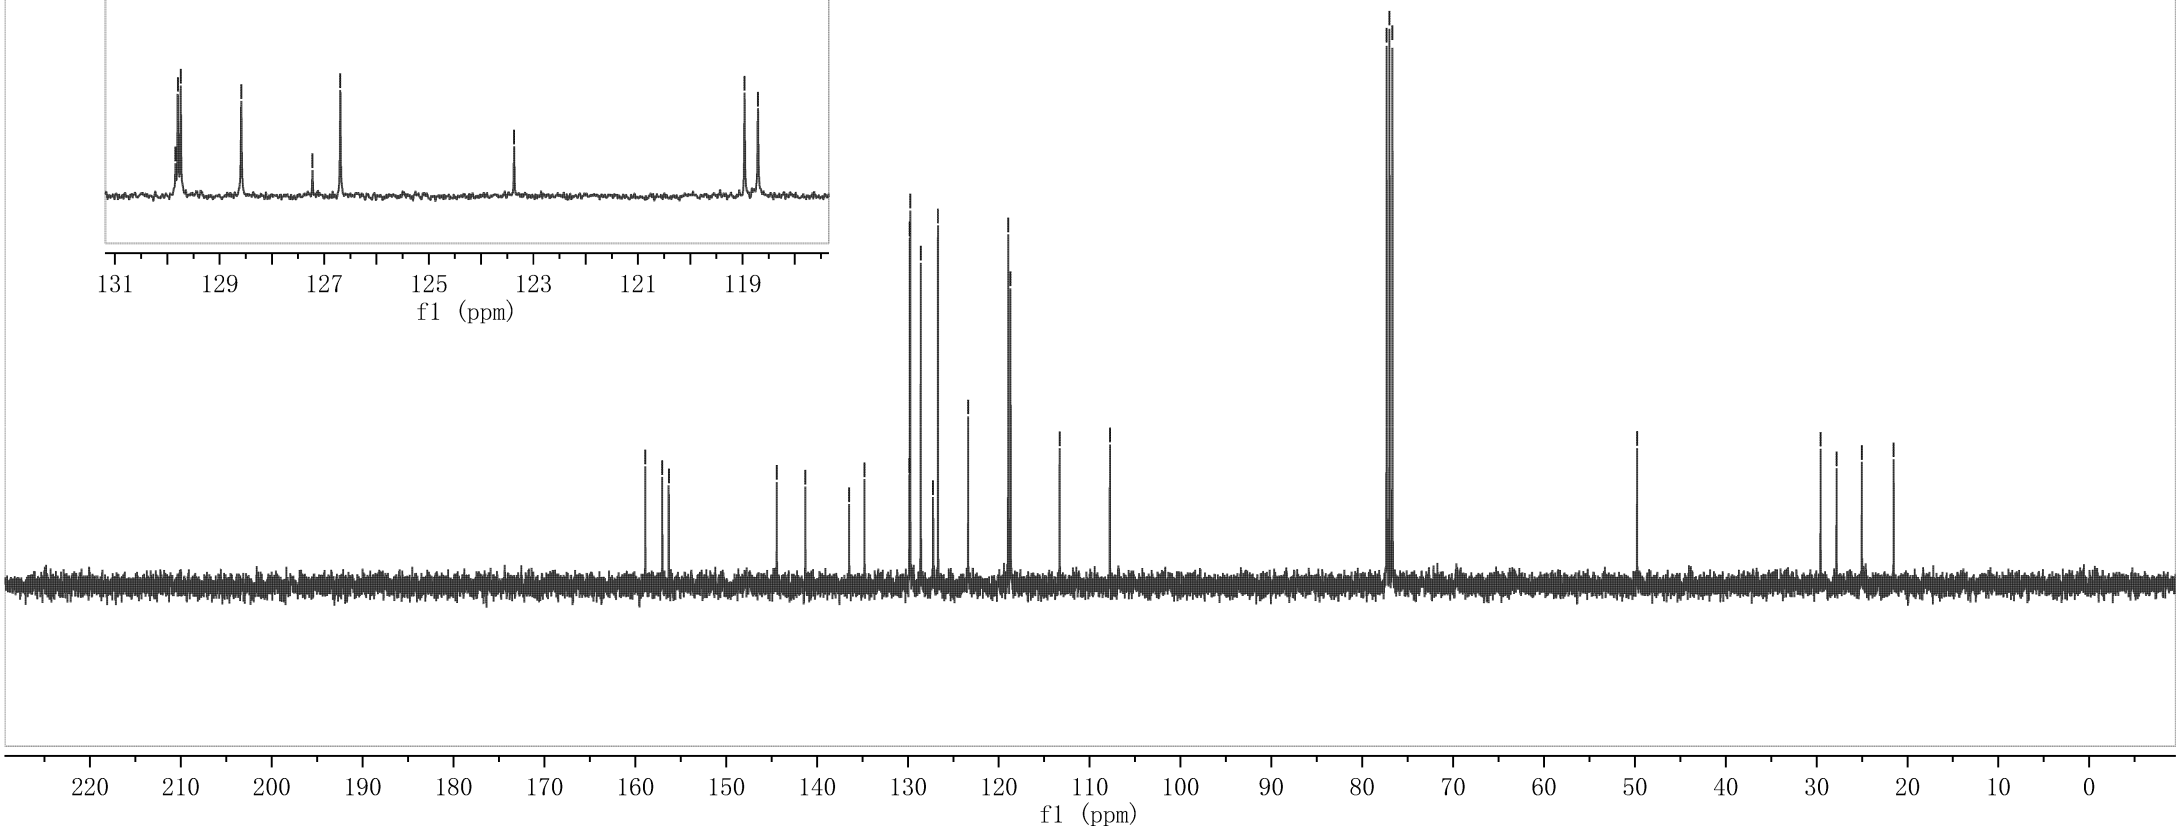

| Parameter                | Value               |
|--------------------------|---------------------|
| 1 Title                  | ZXQ-19-128          |
| 2 Origin                 | Bruker BioSpin GmbH |
| 3 Solvent                | CDC13               |
| 4 Temperature            | 298.0               |
| 5 Number of Scans        | 3                   |
| 6 Acquisition Time       | 4.0894              |
| 7 Acquisition Date       | 2019-12-18T20:31:15 |
| 8 Spectrometer Frequency | 400.13              |
| 9 Spectral Width         | 8012.8              |

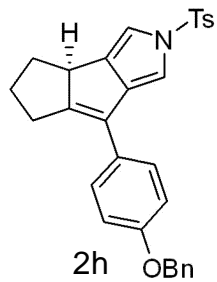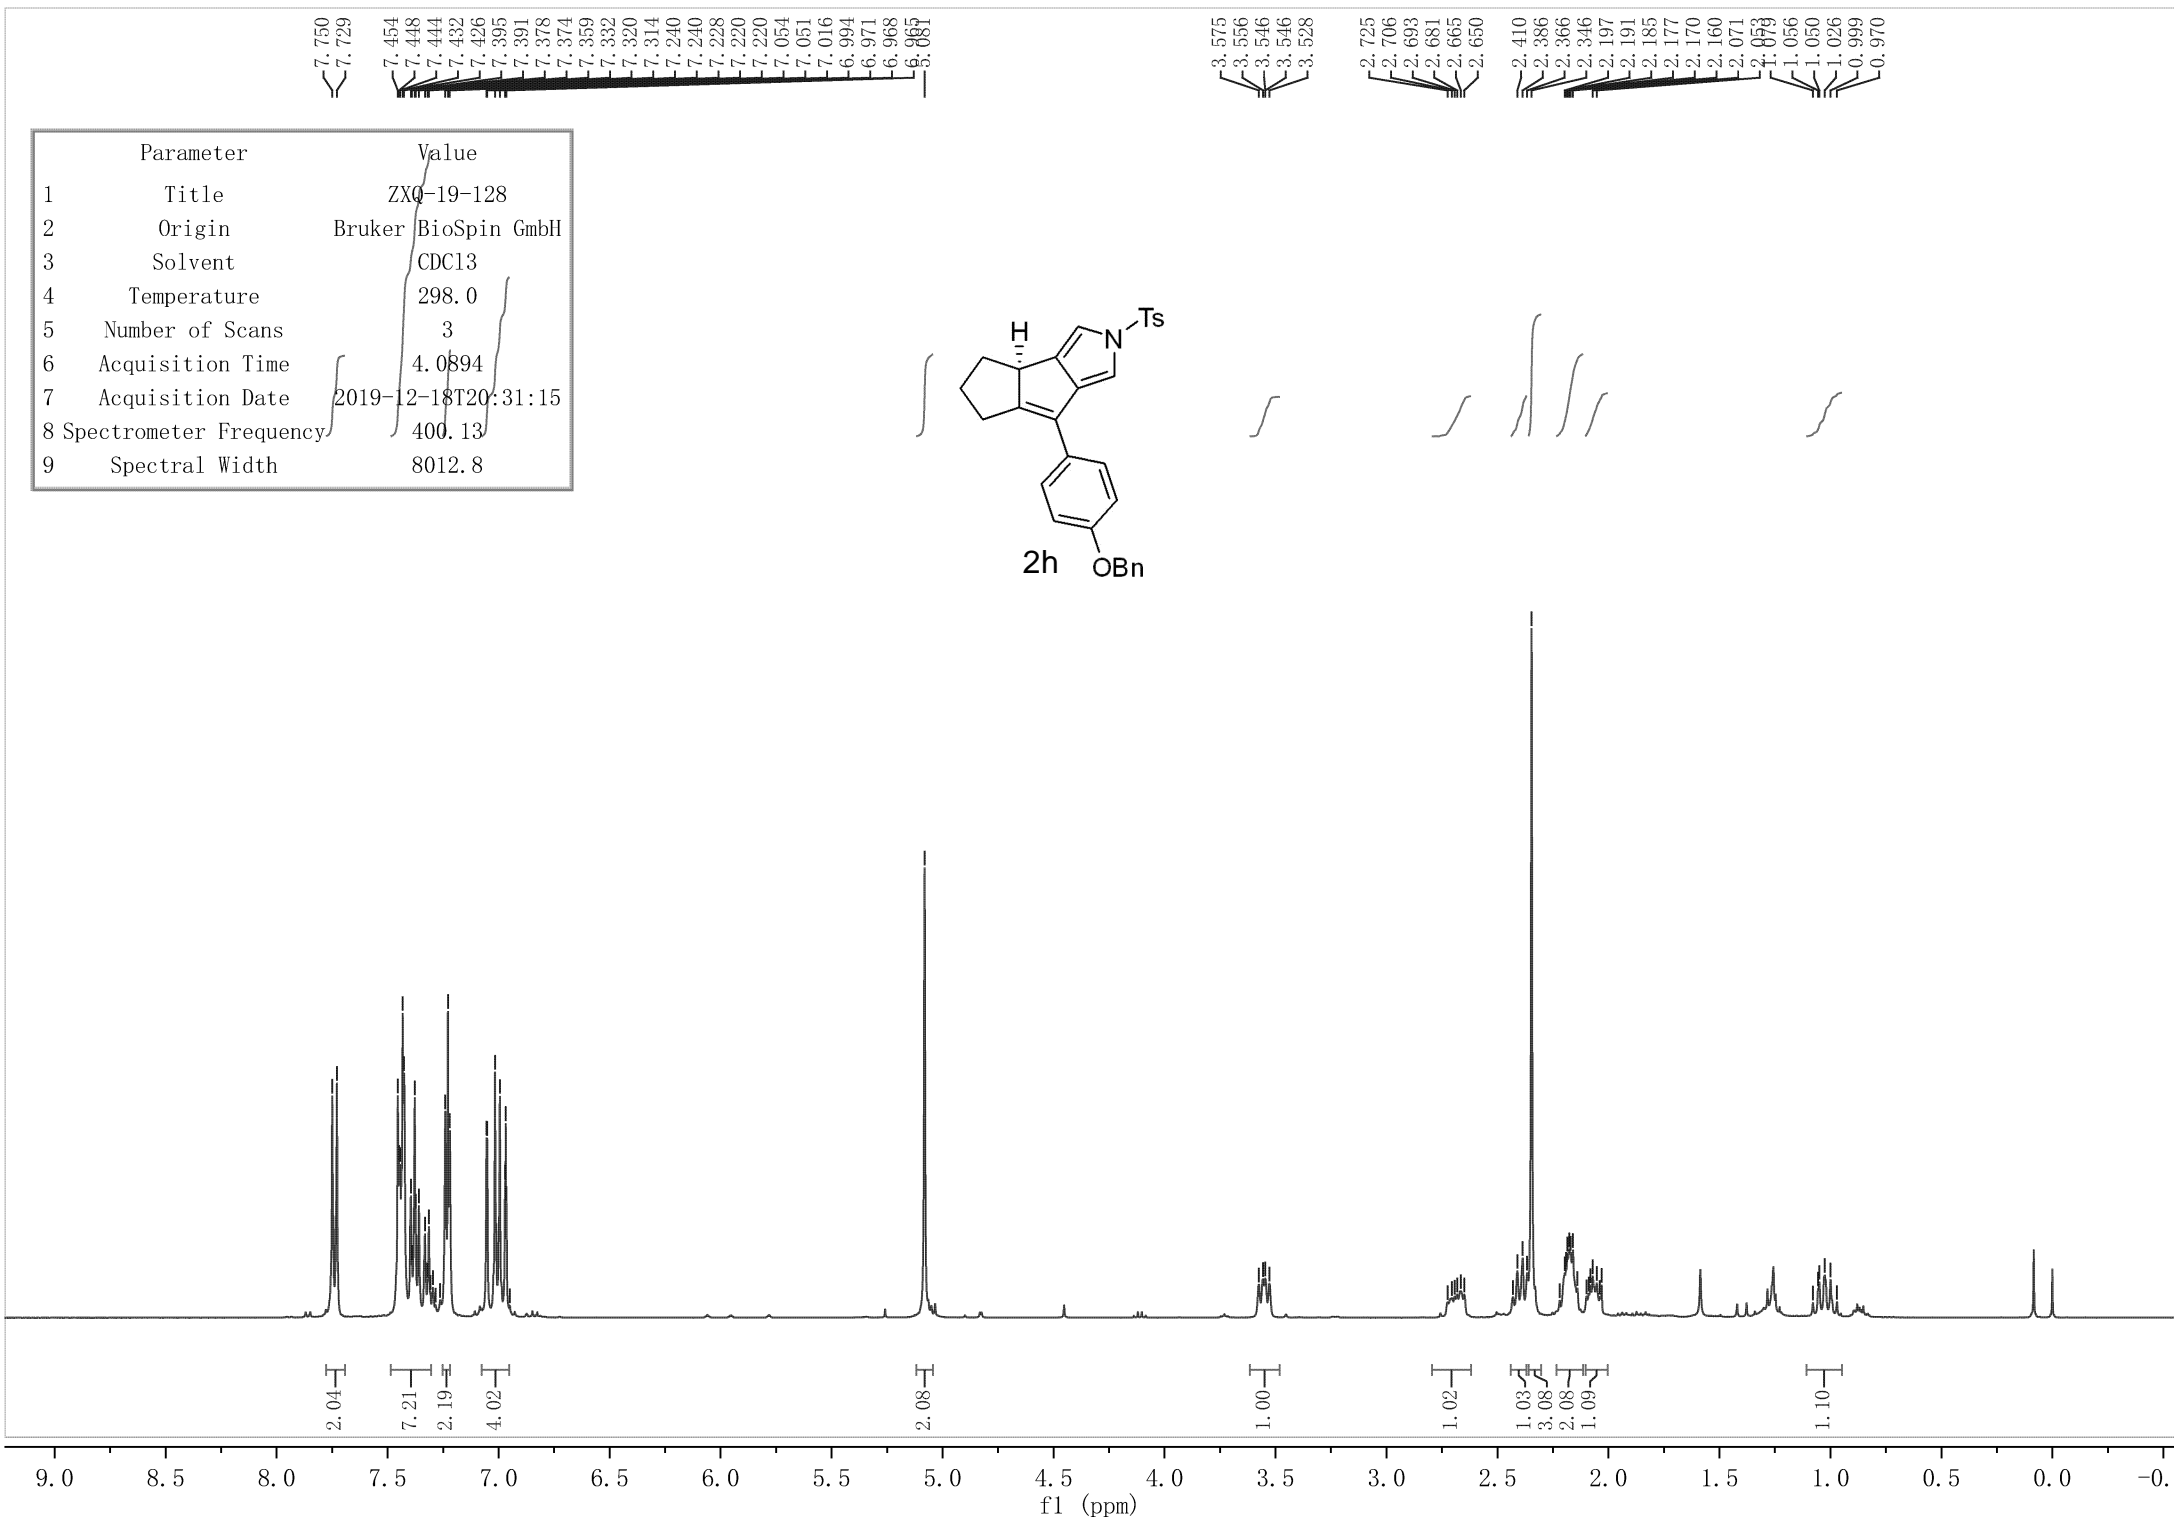

| Parameter                | Value               |
|--------------------------|---------------------|
| 1 Title                  | ZXQ-19-128-C        |
| 2 Origin                 | Bruker BioSpin GmbH |
| 3 Solvent                | CDC13               |
| 4 Temperature            | 300.0               |
| 5 Number of Scans        | 15                  |
| 6 Acquisition Time       | 1.3631              |
| 7 Acquisition Date       | 2019-12-18T20:32:13 |
| 8 Spectrometer Frequency | 100.61              |
| 9 Spectral Width         | 24038.5             |

157.88  
157.86  
144.38  
141.46  
136.89  
136.47  
134.90  
129.77  
128.55  
128.42  
127.93  
127.67  
127.42  
126.66  
113.22  
107.76  
77.32  
77.00  
76.68  
70.00  
49.64  
29.57  
27.81  
25.00  
21.50

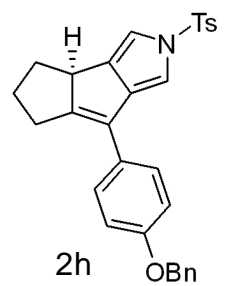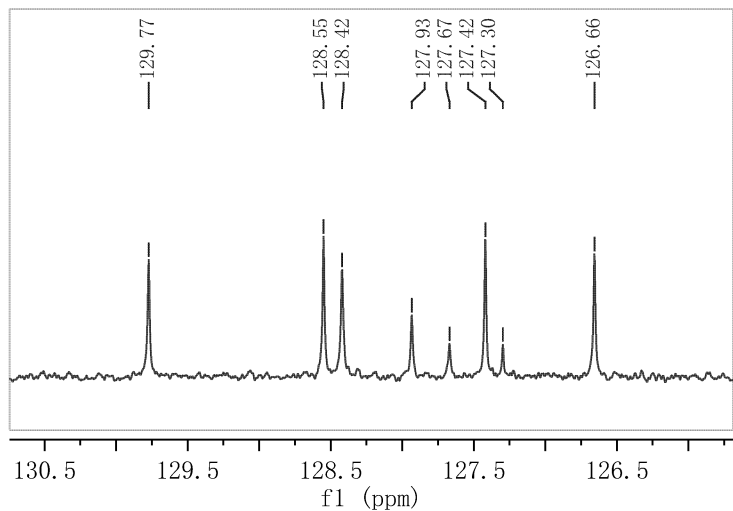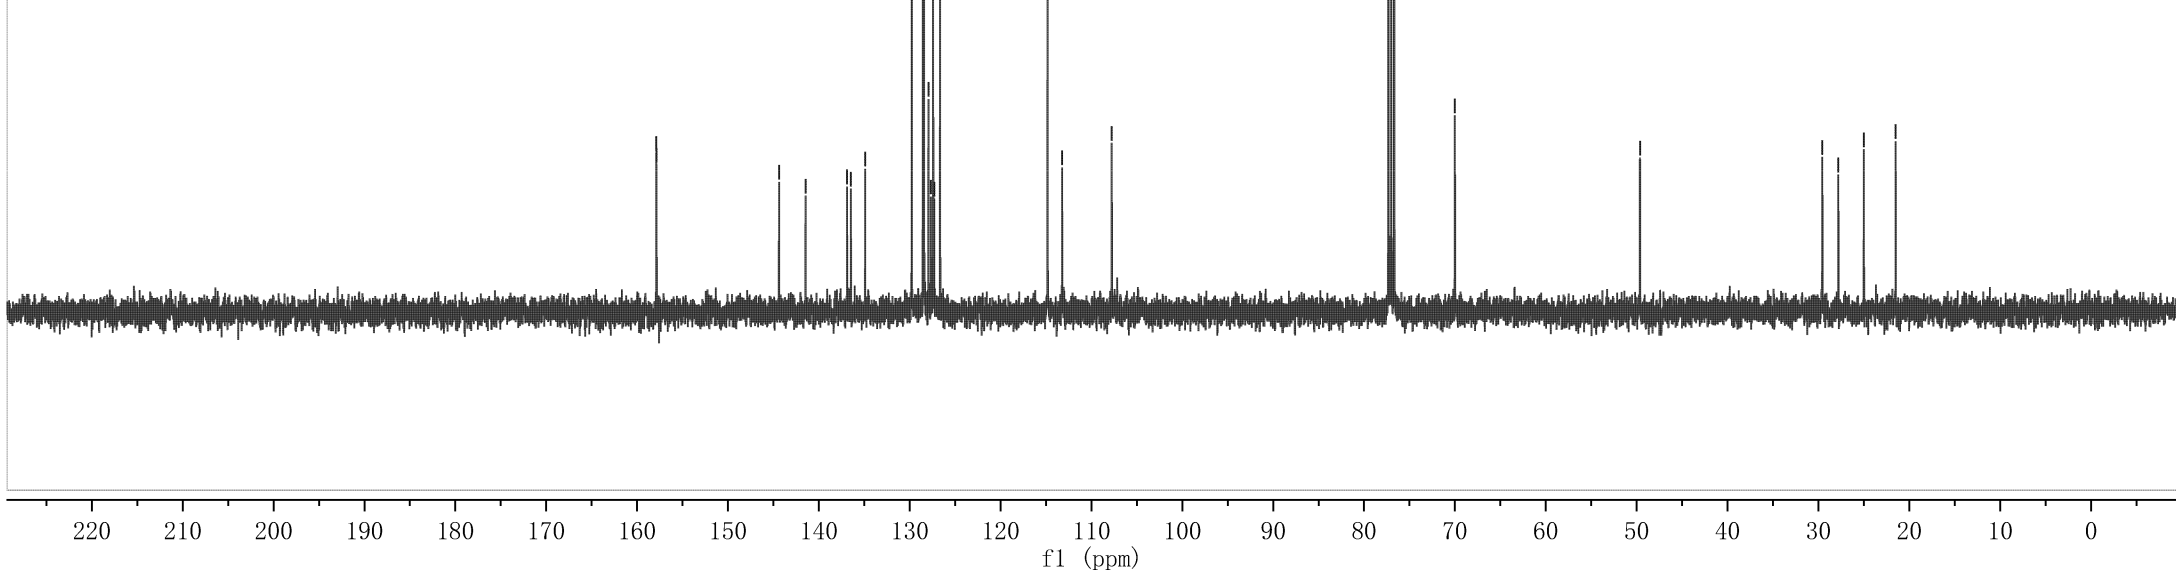



| Parameter                | Value               |
|--------------------------|---------------------|
| 1 Title                  | ZXQ-23-101          |
| 2 Origin                 | Bruker BioSpin GmbH |
| 3 Solvent                | CDC13               |
| 4 Temperature            | 298.7               |
| 5 Number of Scans        | 10                  |
| 6 Acquisition Time       | 3_1719              |
| 7 Acquisition Date       | 2020-11-23T16:51:25 |
| 8 Spectrometer Frequency | 500.17              |
| 9 Spectral Width         | 10330.6             |

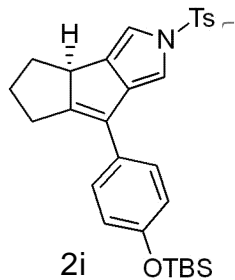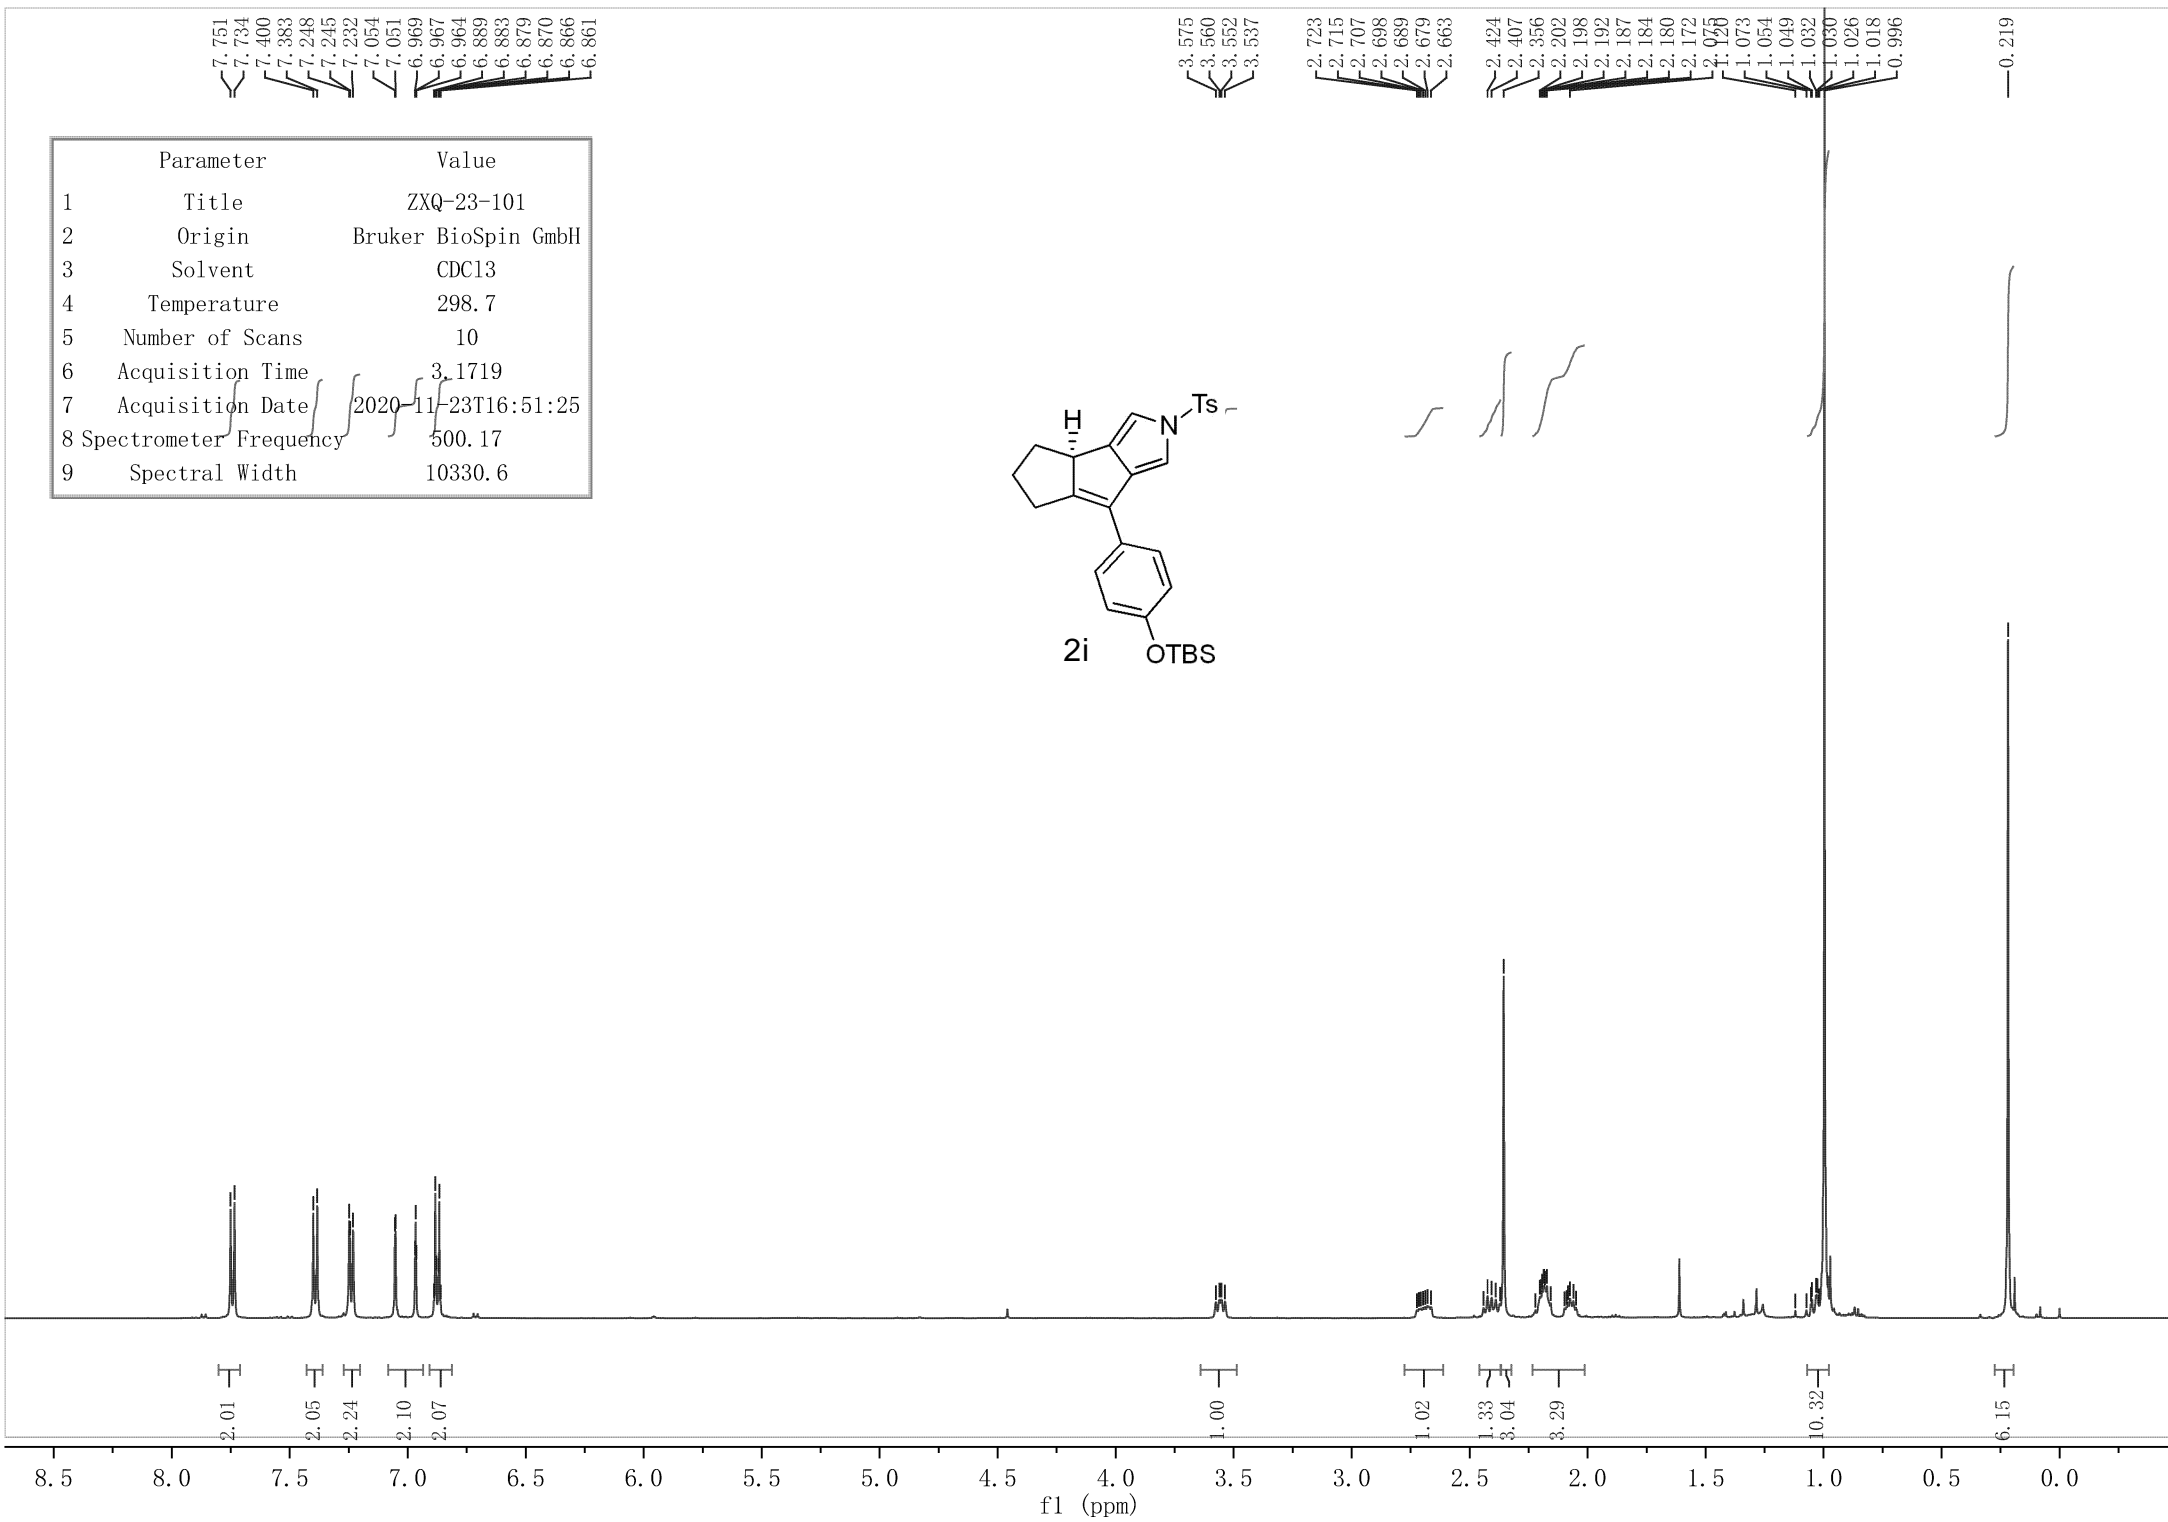

| Parameter                | Value               |
|--------------------------|---------------------|
| 1 Title                  | ZXQ-23-101-1-C      |
| 2 Origin                 | Bruker BioSpin GmbH |
| 3 Solvent                | CDC13               |
| 4 Temperature            | 300.0               |
| 5 Number of Scans        | 21                  |
| 6 Acquisition Time       | 1.3631              |
| 7 Acquisition Date       | 2020-11-26T14:16:13 |
| 8 Spectrometer Frequency | 100.61              |
| 9 Spectral Width         | 24038.5             |

157.87 154.81 144.37 141.49 136.50 134.93 129.78 128.35 127.95 127.41 126.66 120.05 113.20 107.82 77.32 77.00 76.68 49.64 29.58 27.83 25.66 25.05 21.51 18.20 -4.41

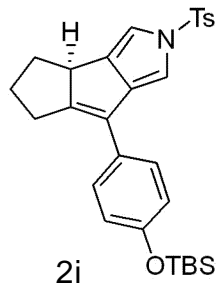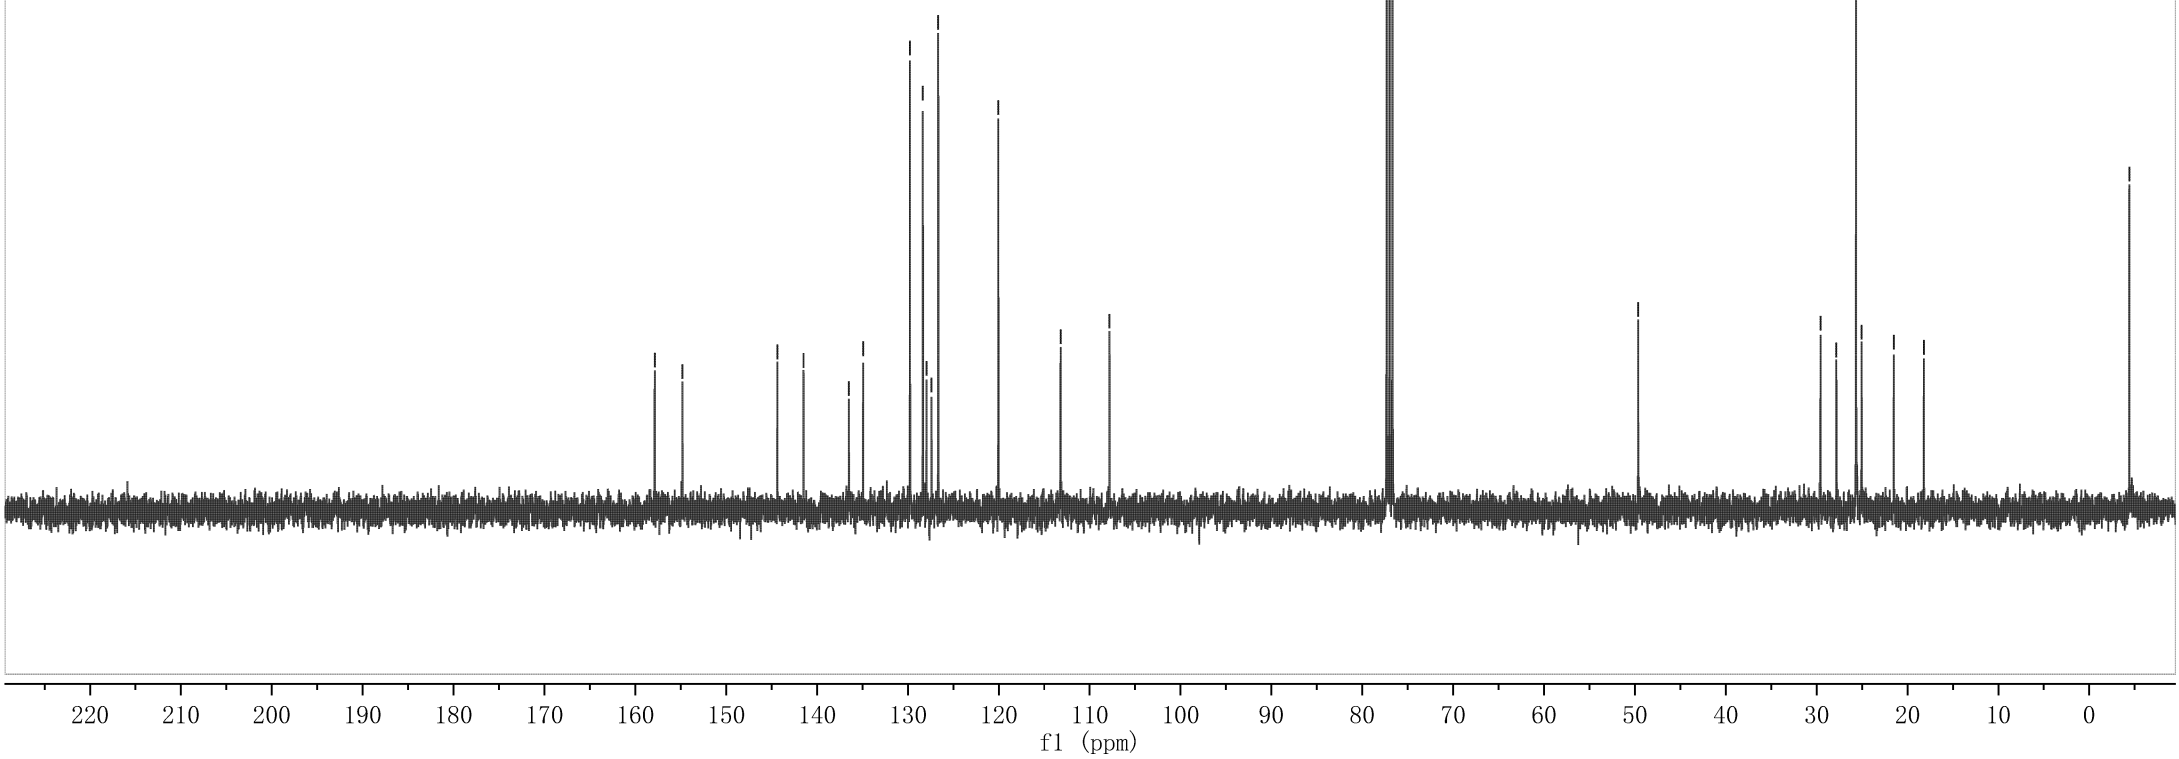

| Parameter                | Value               |
|--------------------------|---------------------|
| 1 Title                  | ZXQ-19-20           |
| 2 Origin                 | Bruker BioSpin GmbH |
| 3 Solvent                | CDC13               |
| 4 Temperature            | 298.0               |
| 5 Number of Scans        | 11                  |
| 6 Acquisition Time       | 4.0894              |
| 7 Acquisition Date       | 2019-11-18T16:05:46 |
| 8 Spectrometer Frequency | 400.13              |
| 9 Spectral Width         | 8012.8              |

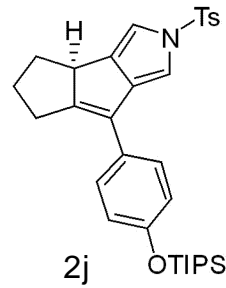

7.754  
7.733  
7.394  
7.373  
7.258  
7.253  
7.238  
7.052  
7.049  
6.967  
6.964  
6.961  
6.931  
6.924  
6.919  
6.907  
6.902  
6.895

3.586  
3.586  
3.566  
3.557  
3.538

2.739  
2.722  
2.707  
2.695  
2.679  
2.663

2.440  
2.418  
2.368  
2.217  
2.202  
2.195  
2.189

1.336  
1.316  
1.296  
1.284  
1.278  
1.278  
1.259

1.241  
1.232  
1.224  
1.124  
1.107  
1.080  
1.068  
1.063  
1.038  
1.012

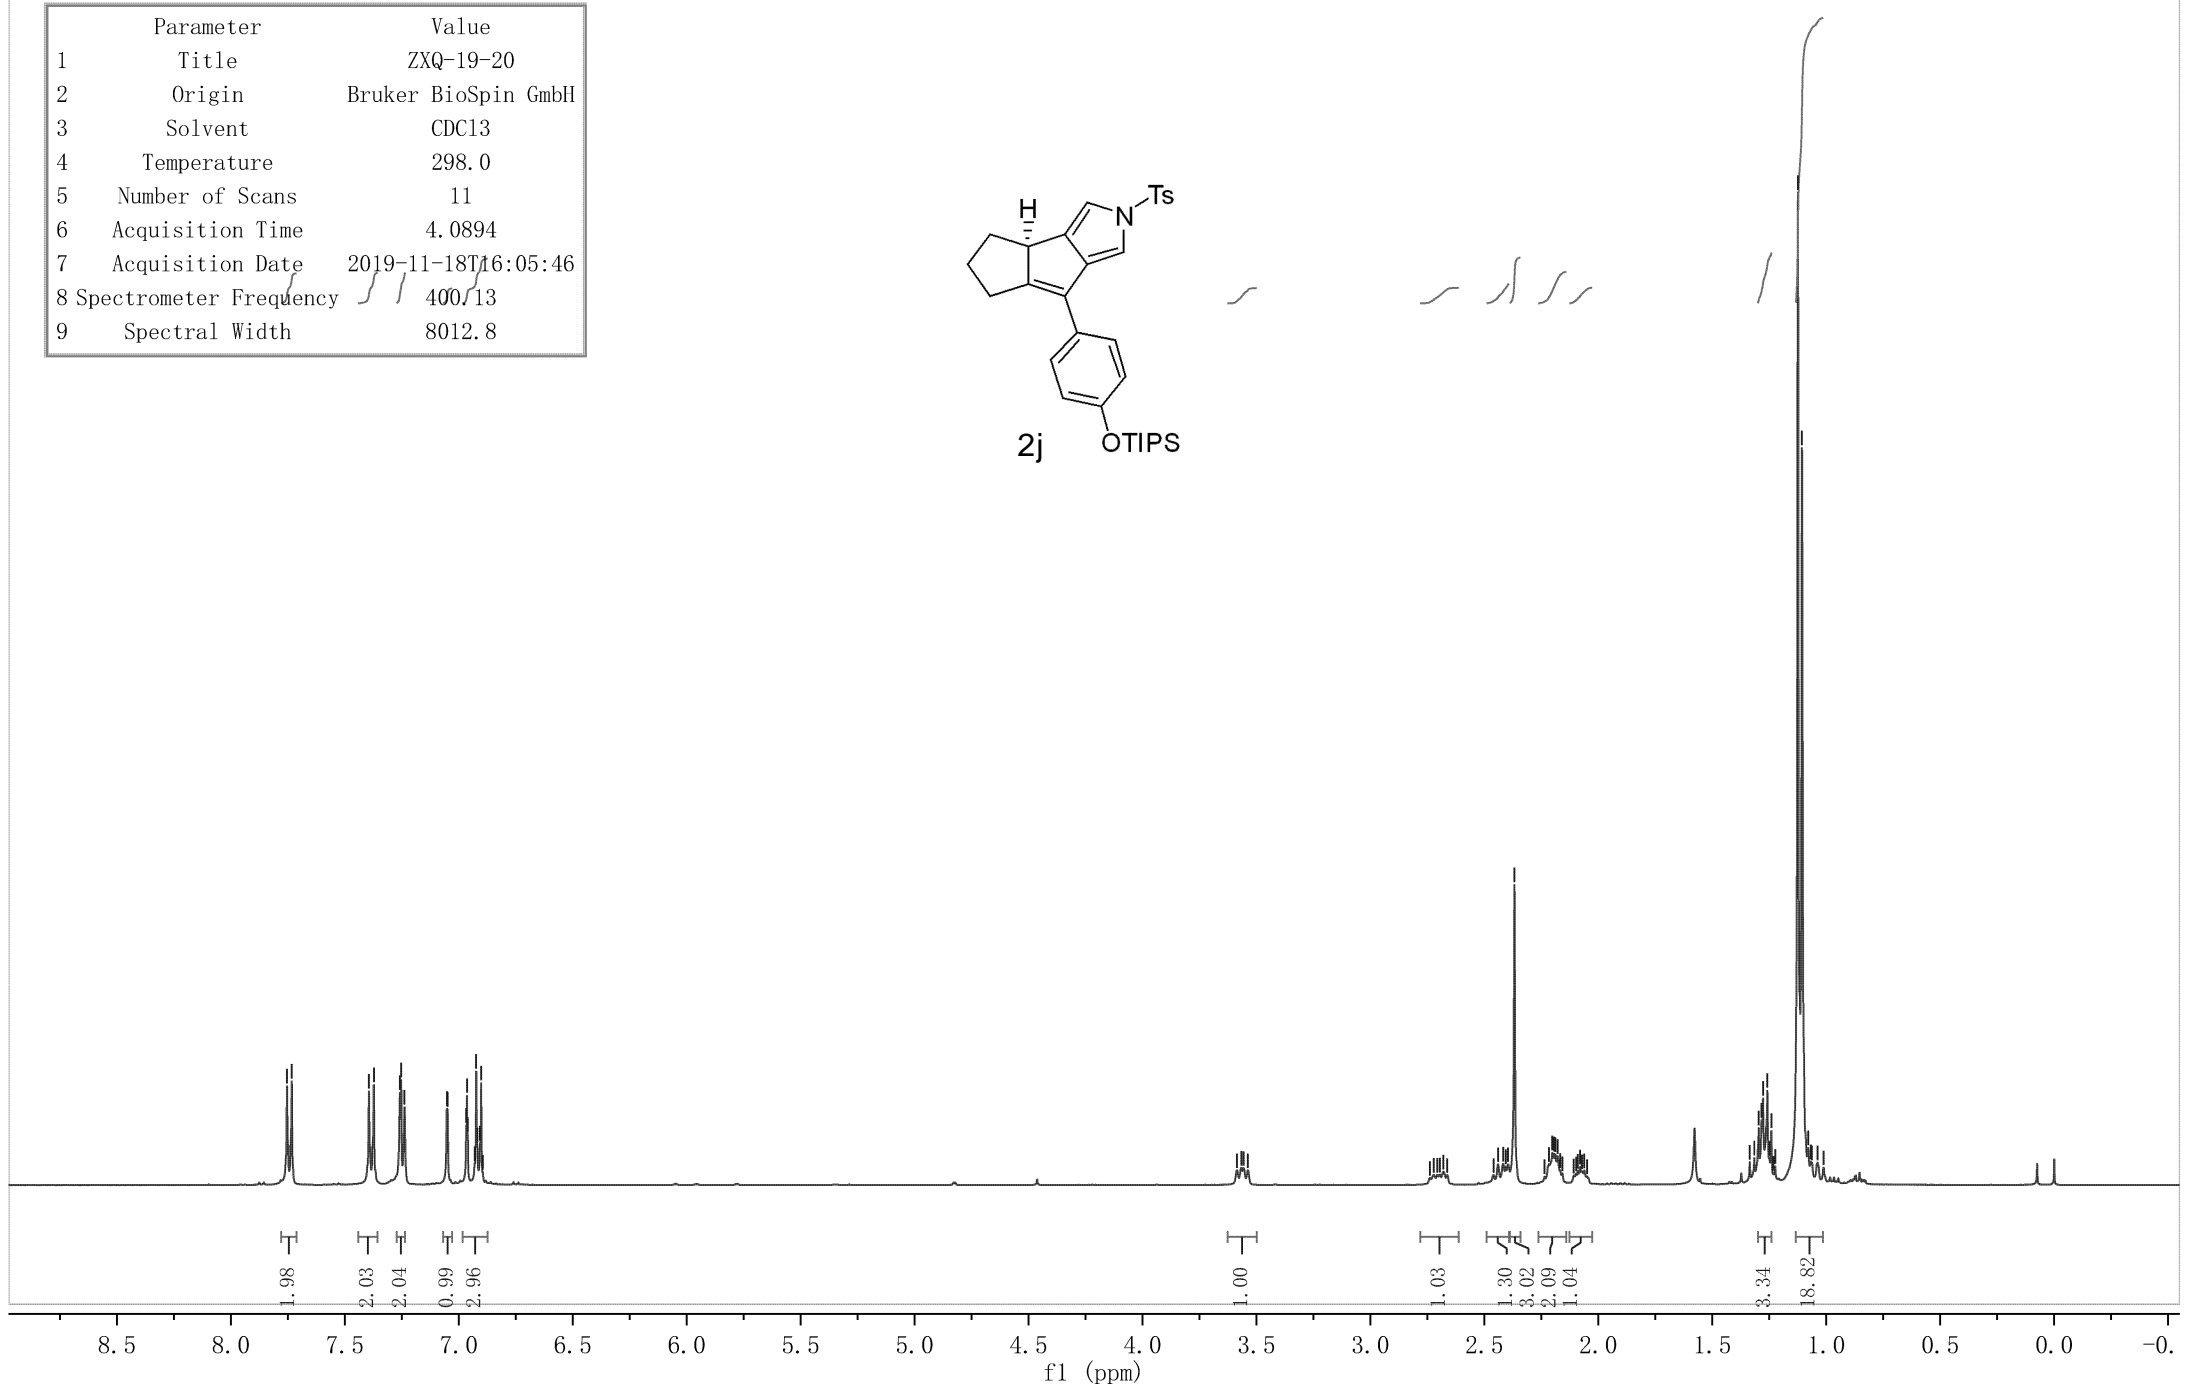

| Parameter                | Value               |
|--------------------------|---------------------|
| 1 Title                  | ZXQ-19-20-C         |
| 2 Origin                 | Bruker BioSpin GmbH |
| 3 Solvent                | CDC13               |
| 4 Temperature            | 300.0               |
| 5 Number of Scans        | 91                  |
| 6 Acquisition Time       | 1.3631              |
| 7 Acquisition Date       | 2019-11-18T16:07:20 |
| 8 Spectrometer Frequency | 100.61              |
| 9 Spectral Width         | 24038.5             |

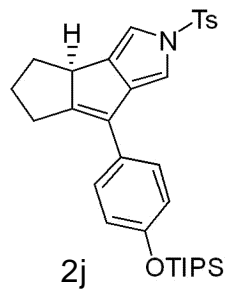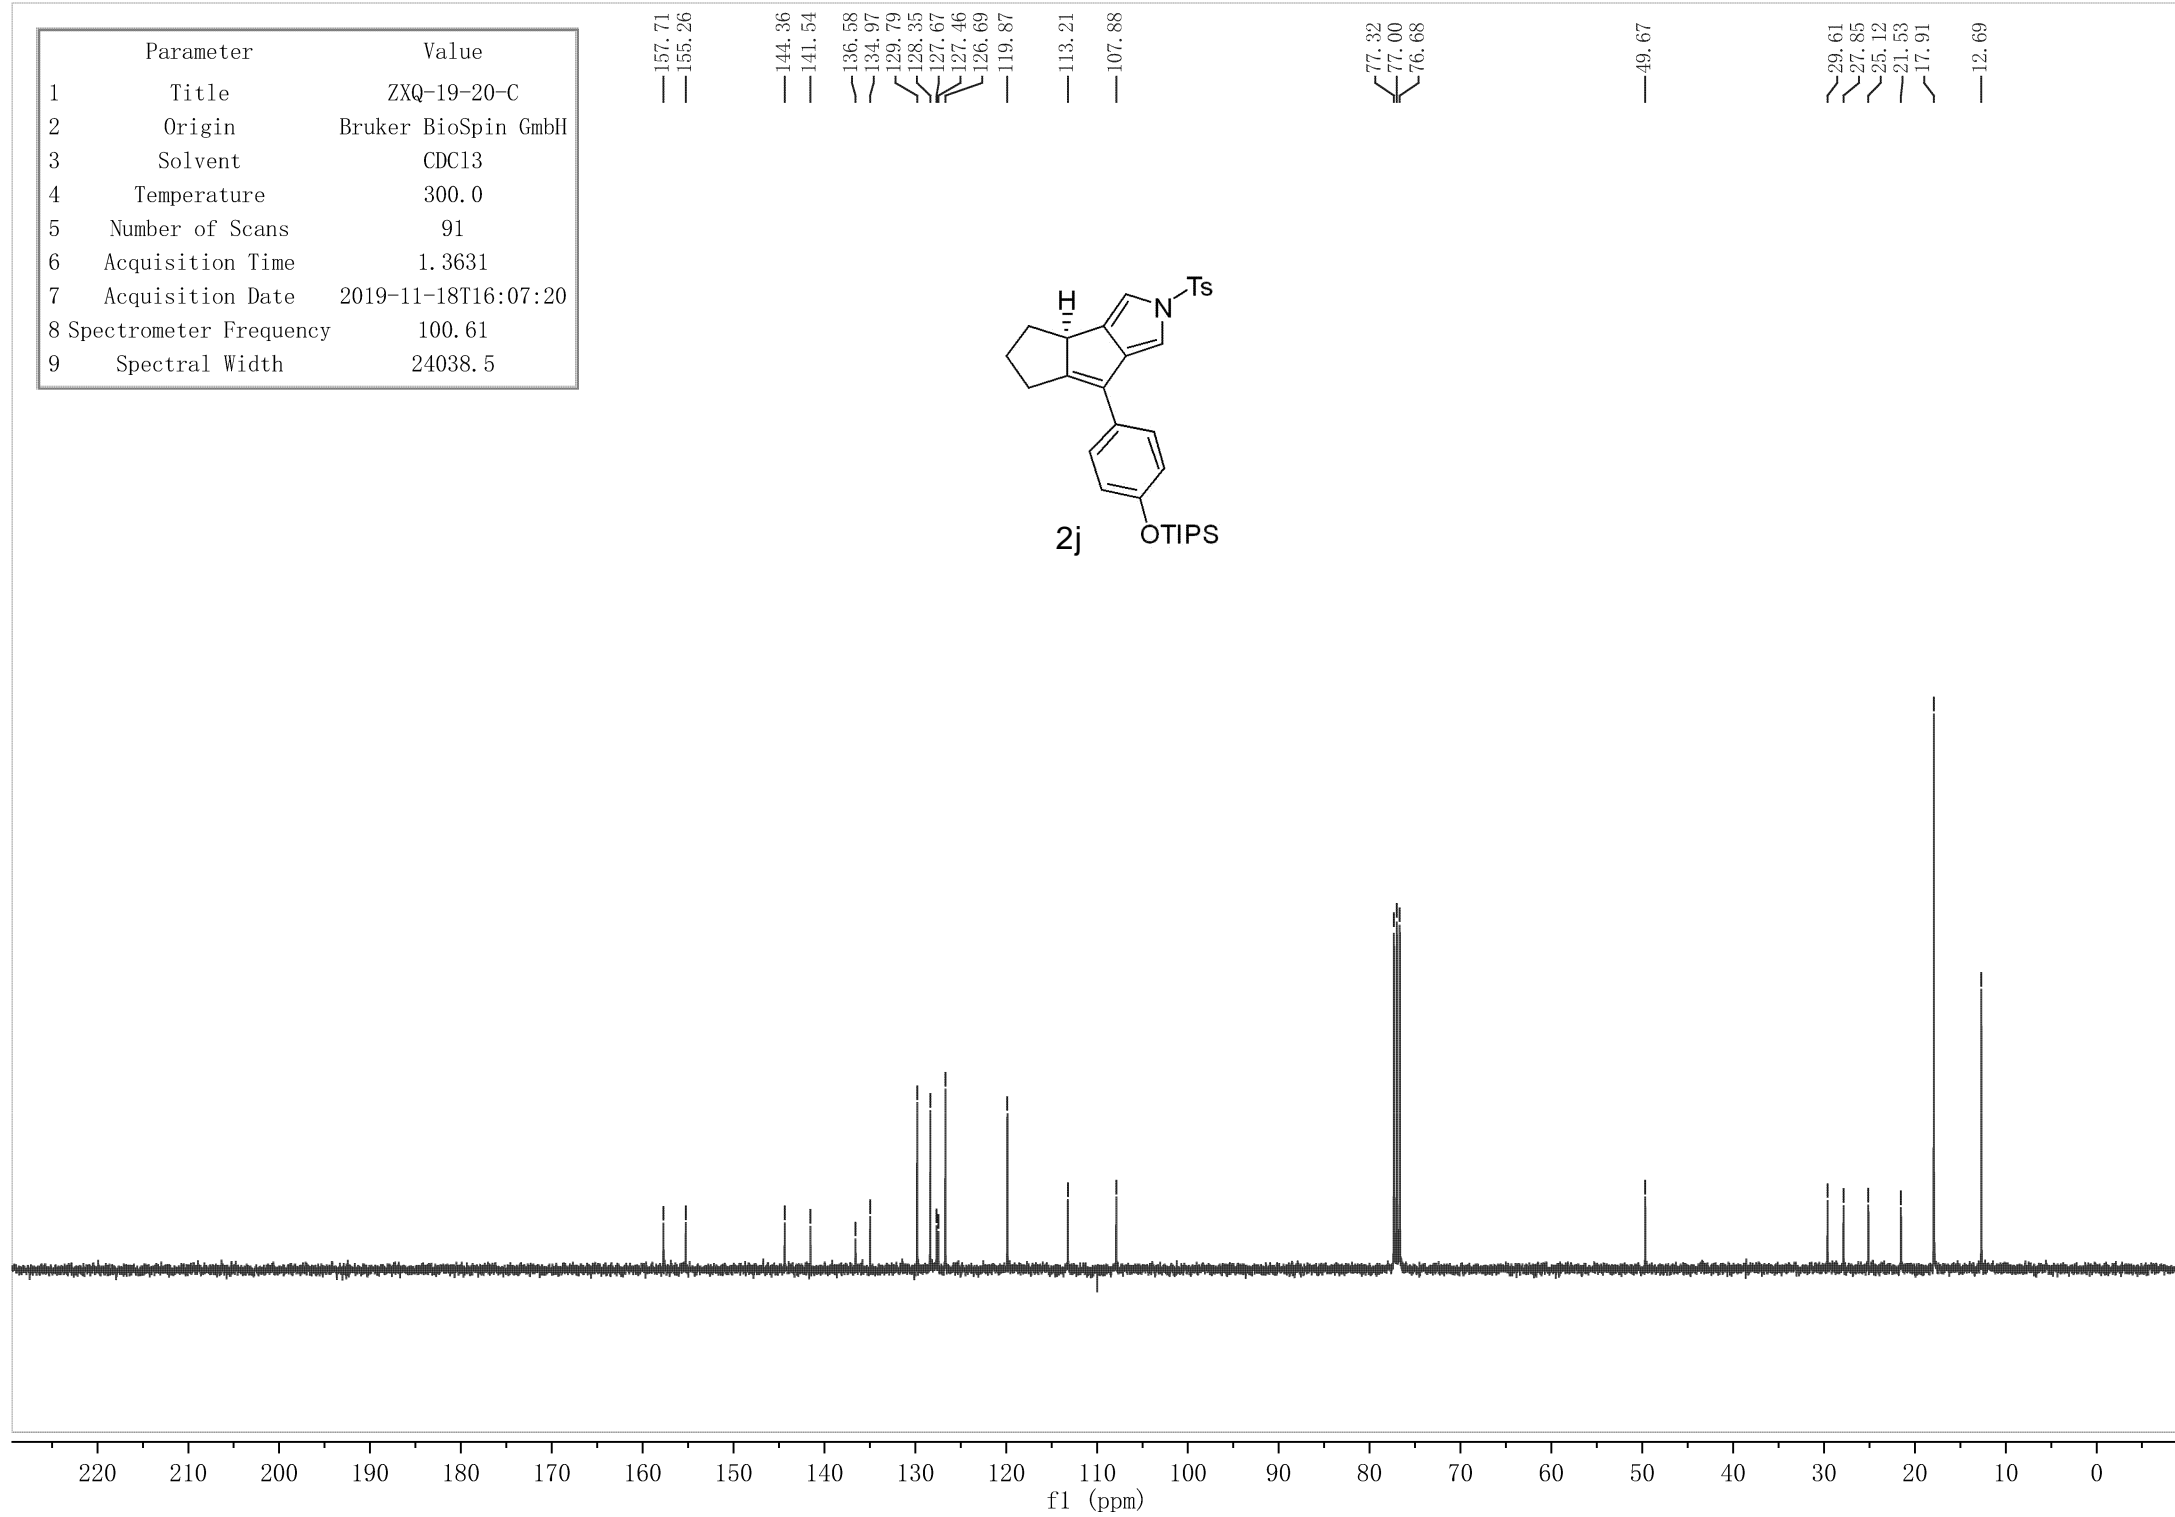

7.762  
7.741  
7.523  
7.501  
7.271  
7.258  
7.251  
7.141  
7.135  
7.130  
7.118  
7.113  
7.107  
7.048  
7.045  
6.983  
6.980  
6.976

3.613  
3.594  
3.585  
3.566  
2.746  
2.735  
2.724  
2.714  
2.701  
2.692  
2.686  
2.681  
2.445  
2.424  
2.402  
2.376  
2.317  
2.230  
2.218  
2.212  
2.208  
2.202  
2.193  
2.188  
2.186  
1.085  
1.079  
1.058  
1.050  
1.028  
0.999

| Parameter                | Value               |
|--------------------------|---------------------|
| 1 Title                  | ZXQ-20-45           |
| 2 Origin                 | Bruker BioSpin GmbH |
| 3 Solvent                | CDC13               |
| 4 Temperature            | 298.0               |
| 5 Number of Scans        | 13                  |
| 6 Acquisition Time       | 3.9846              |
| 7 Acquisition Date       | 2020-04-15T11:15:24 |
| 8 Spectrometer Frequency | 400.03              |
| 9 Spectral Width         | 8223.7              |

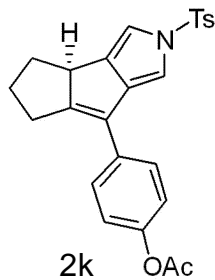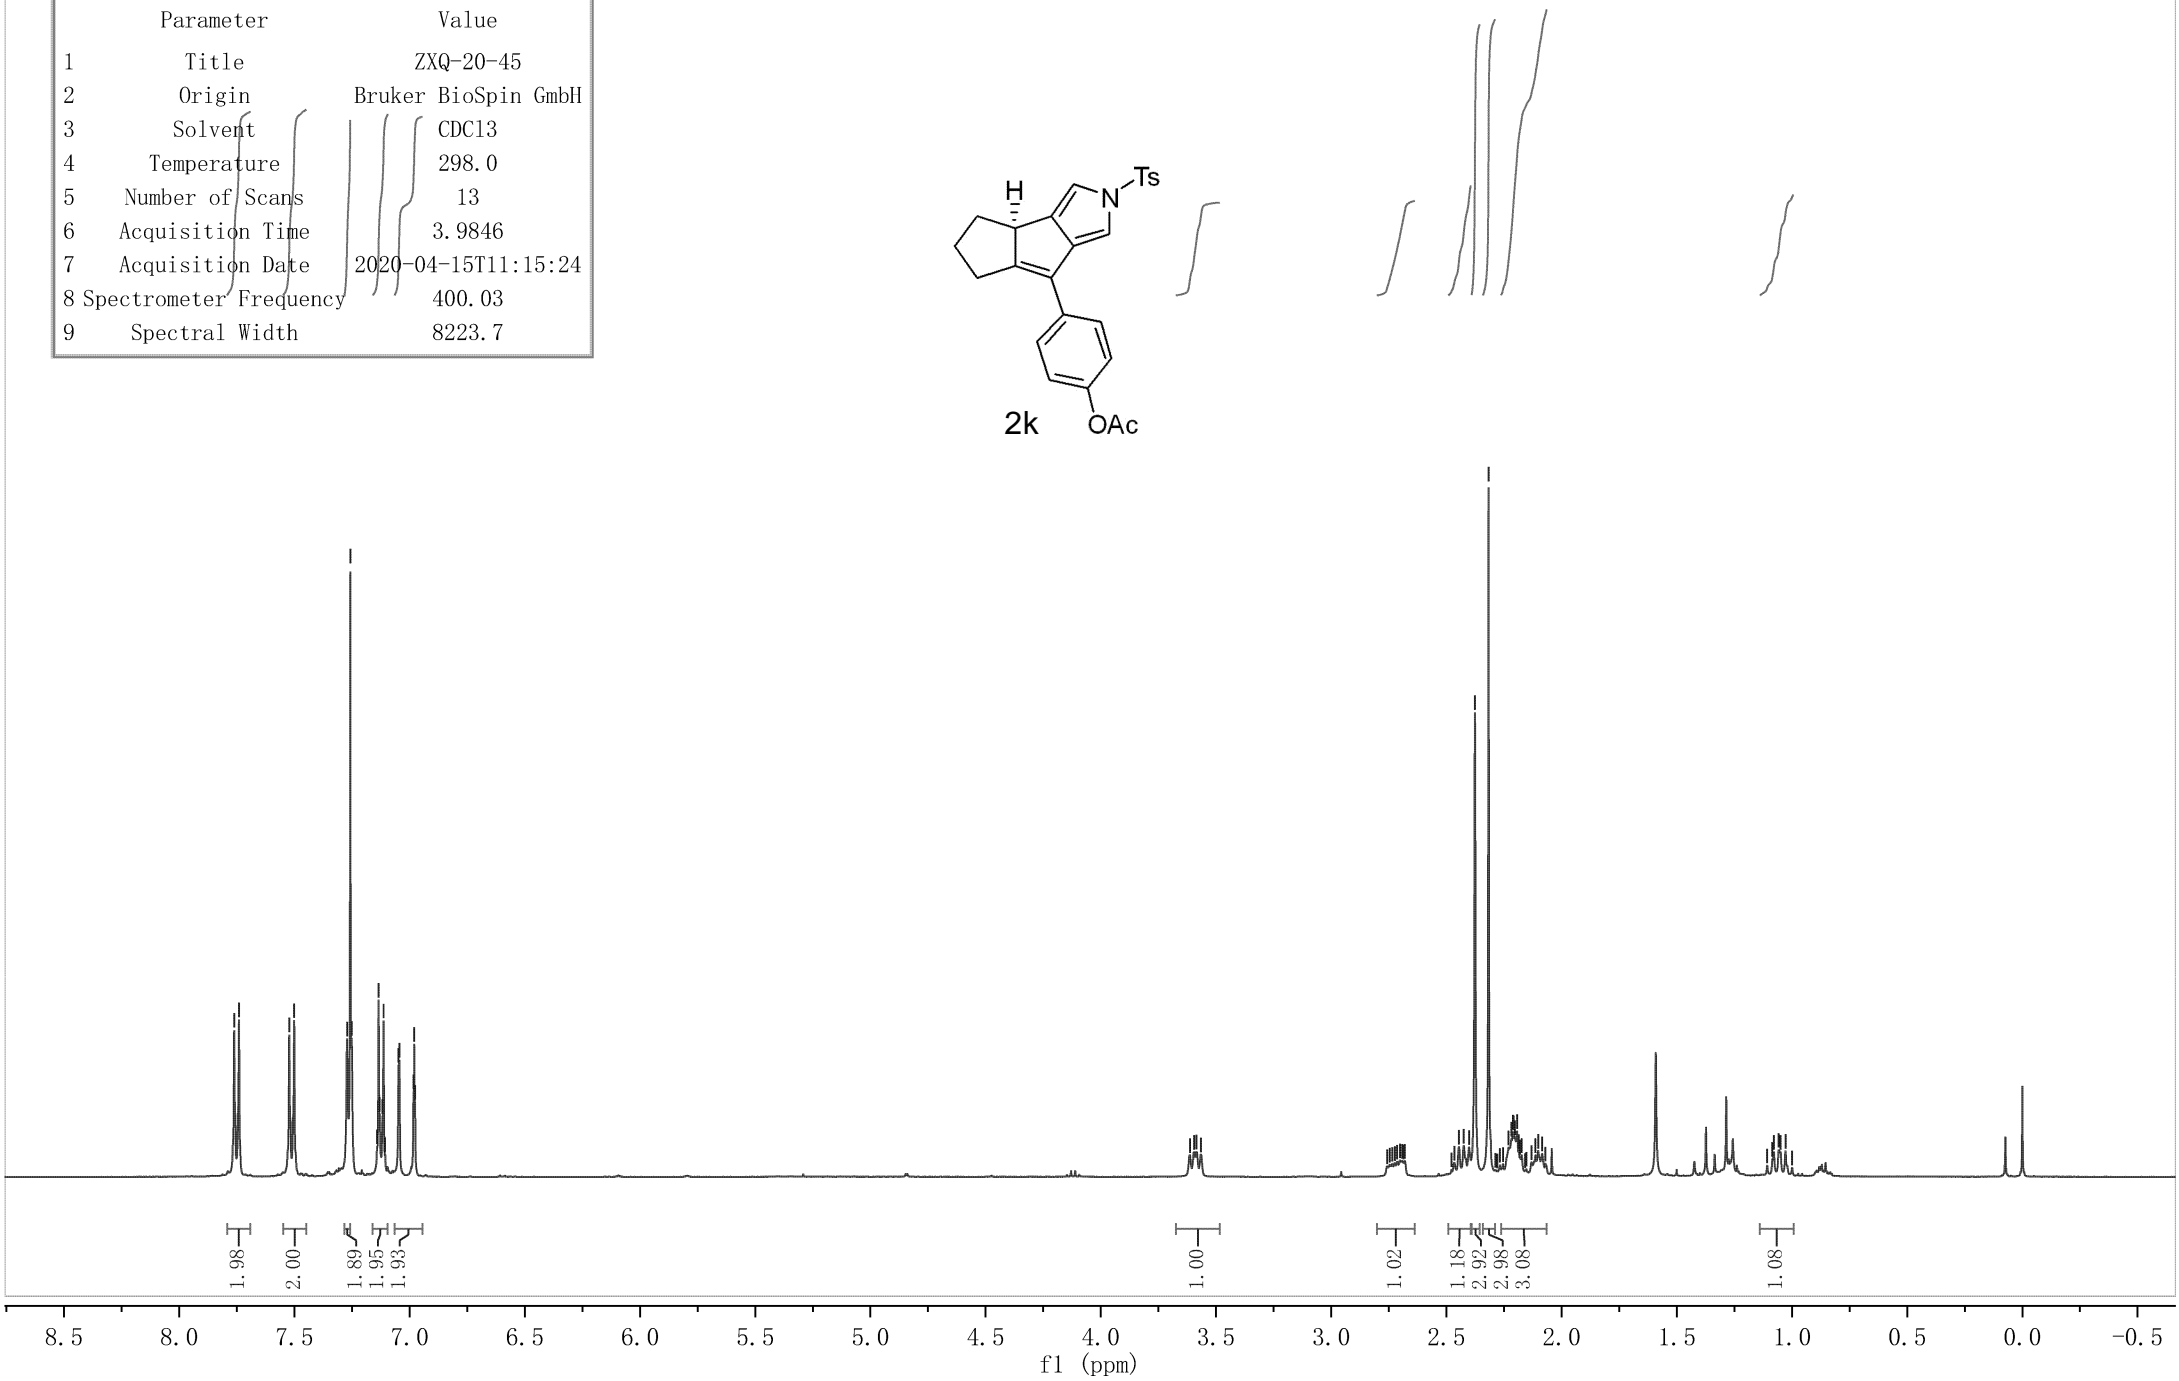

| Parameter                | Value               |
|--------------------------|---------------------|
| 1 Title                  | ZXQ-20-45-C         |
| 2 Origin                 | Bruker BioSpin GmbH |
| 3 Solvent                | CDC13               |
| 4 Temperature            | 298.5               |
| 5 Number of Scans        | 100                 |
| 6 Acquisition Time       | 1.3631              |
| 7 Acquisition Date       | 2020-04-15T11:18:49 |
| 8 Spectrometer Frequency | 100.59              |
| 9 Spectral Width         | 24038.5             |

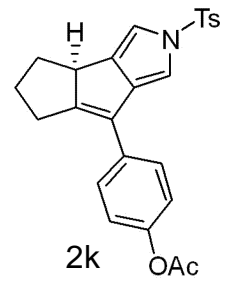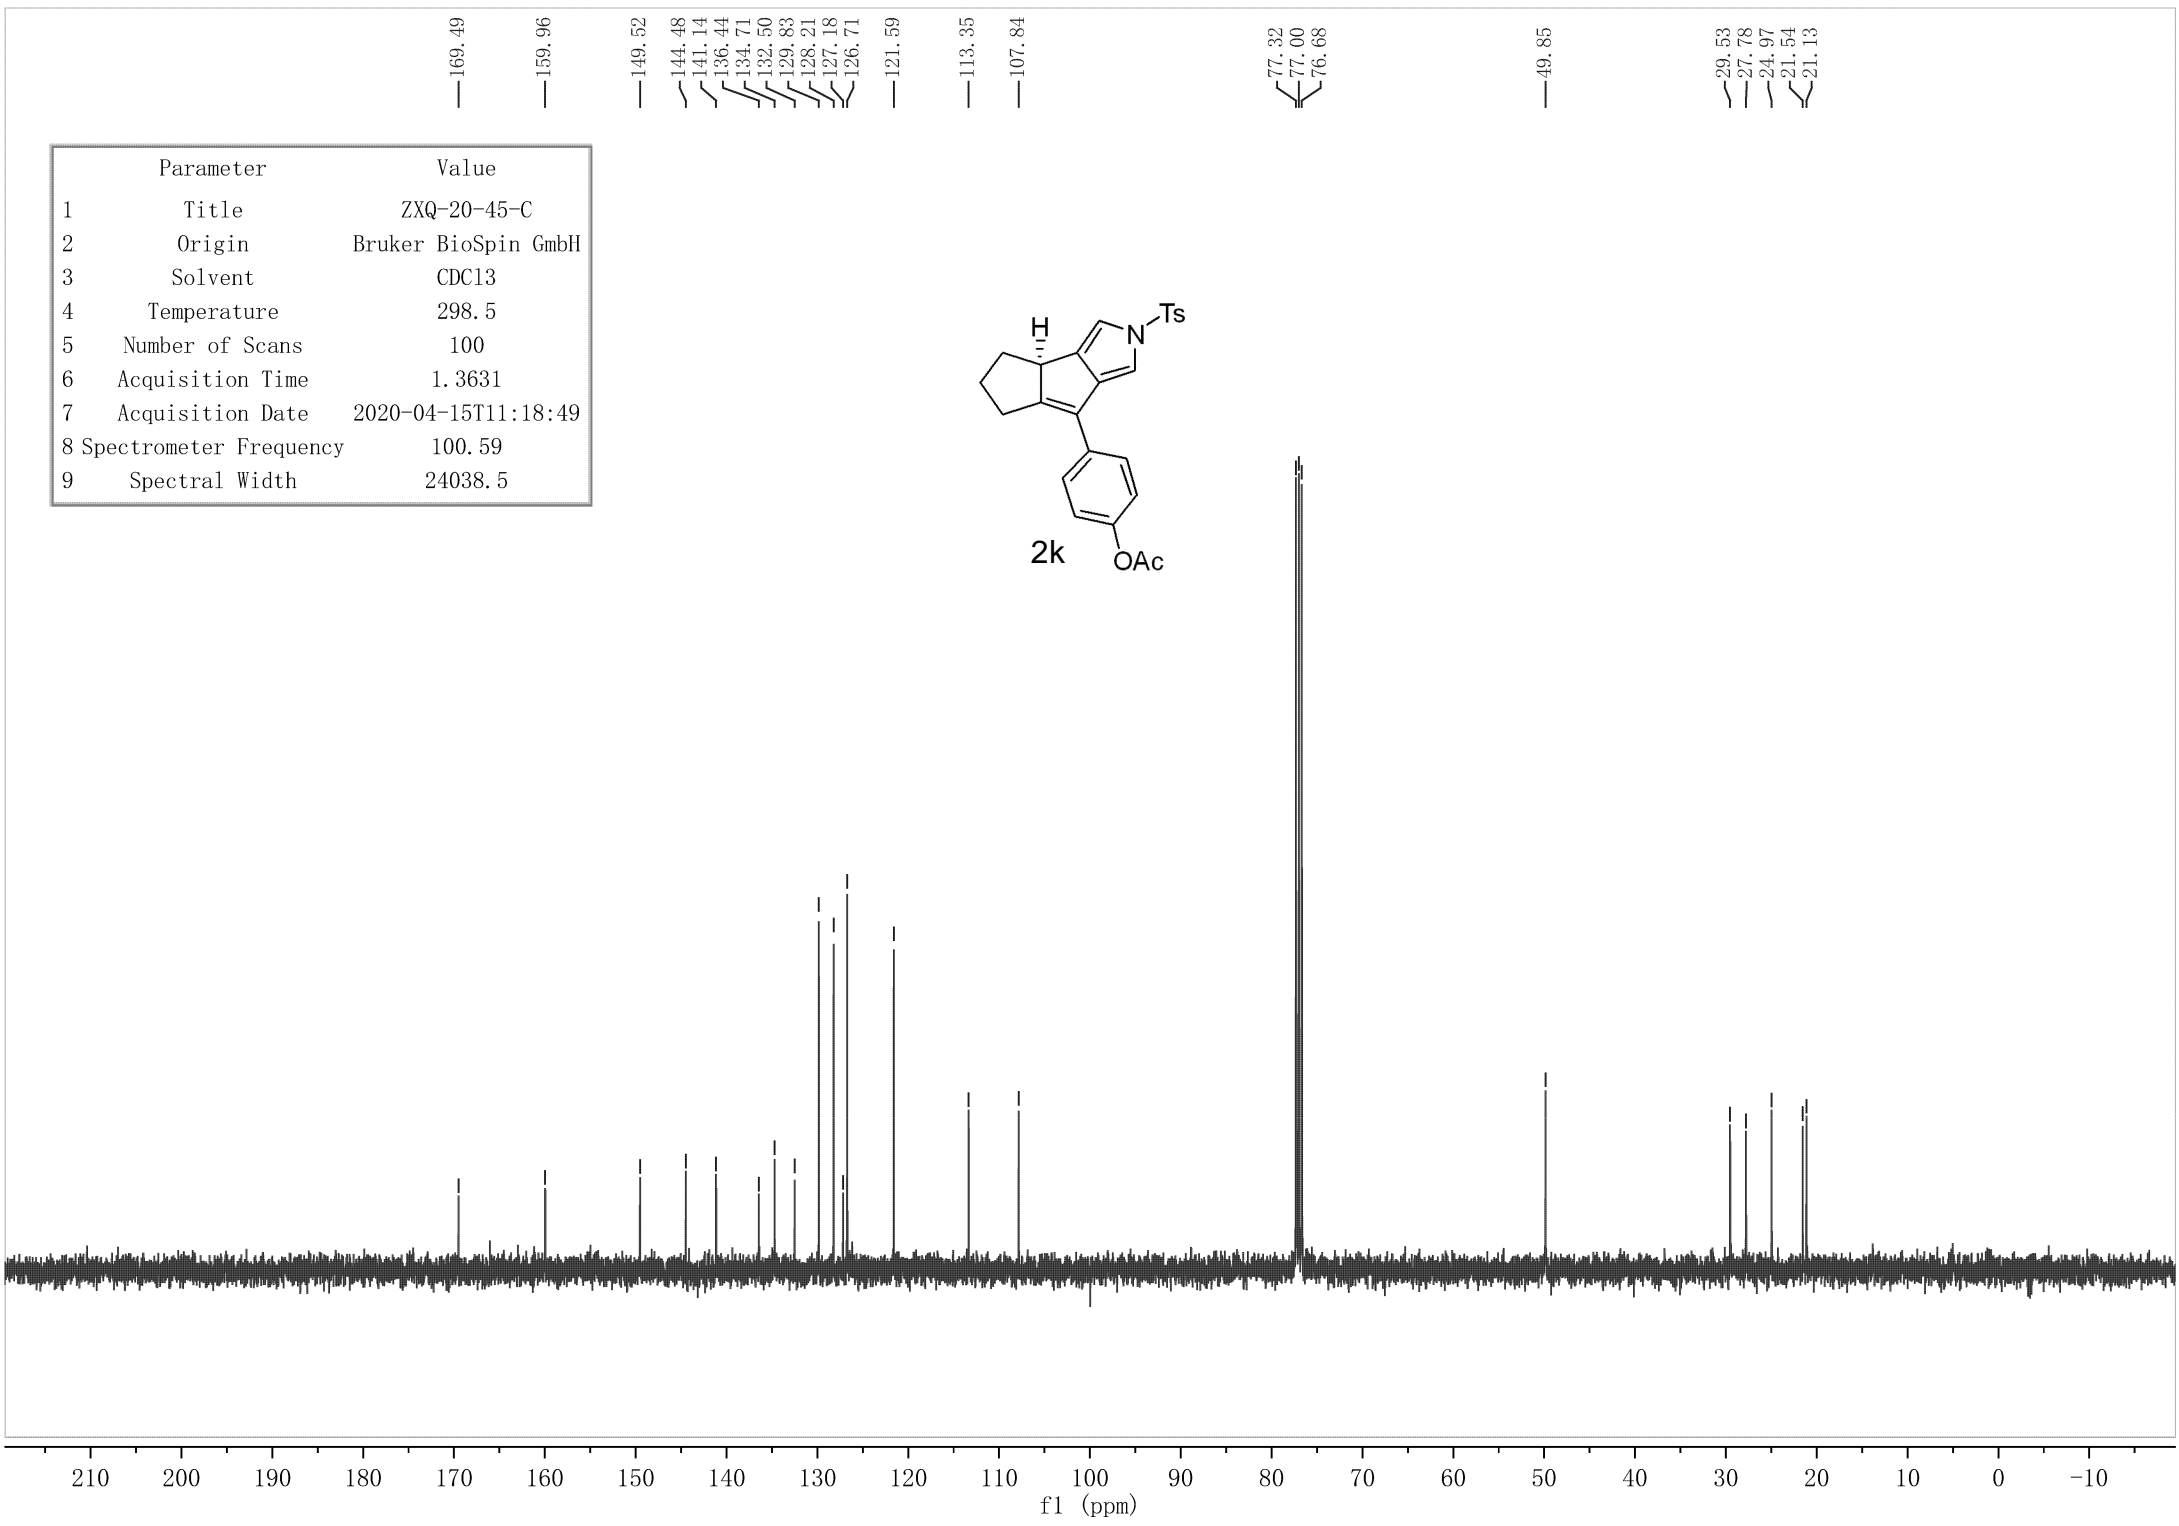

| Parameter                | Value               |
|--------------------------|---------------------|
| 1 Title                  | ZXQ-18-206-20Me     |
| 2 Origin                 | Bruker BioSpin GmbH |
| 3 Solvent                | CDCl3               |
| 4 Temperature            | 298.0               |
| 5 Number of Scans        | 7                   |
| 6 Acquisition Time       | 4.0894              |
| 7 Acquisition Date       | 2019-11-08T18:47:38 |
| 8 Spectrometer Frequency | 400.13              |
| 9 Spectral Width         | 8012.8              |

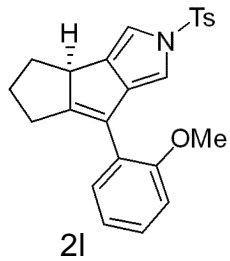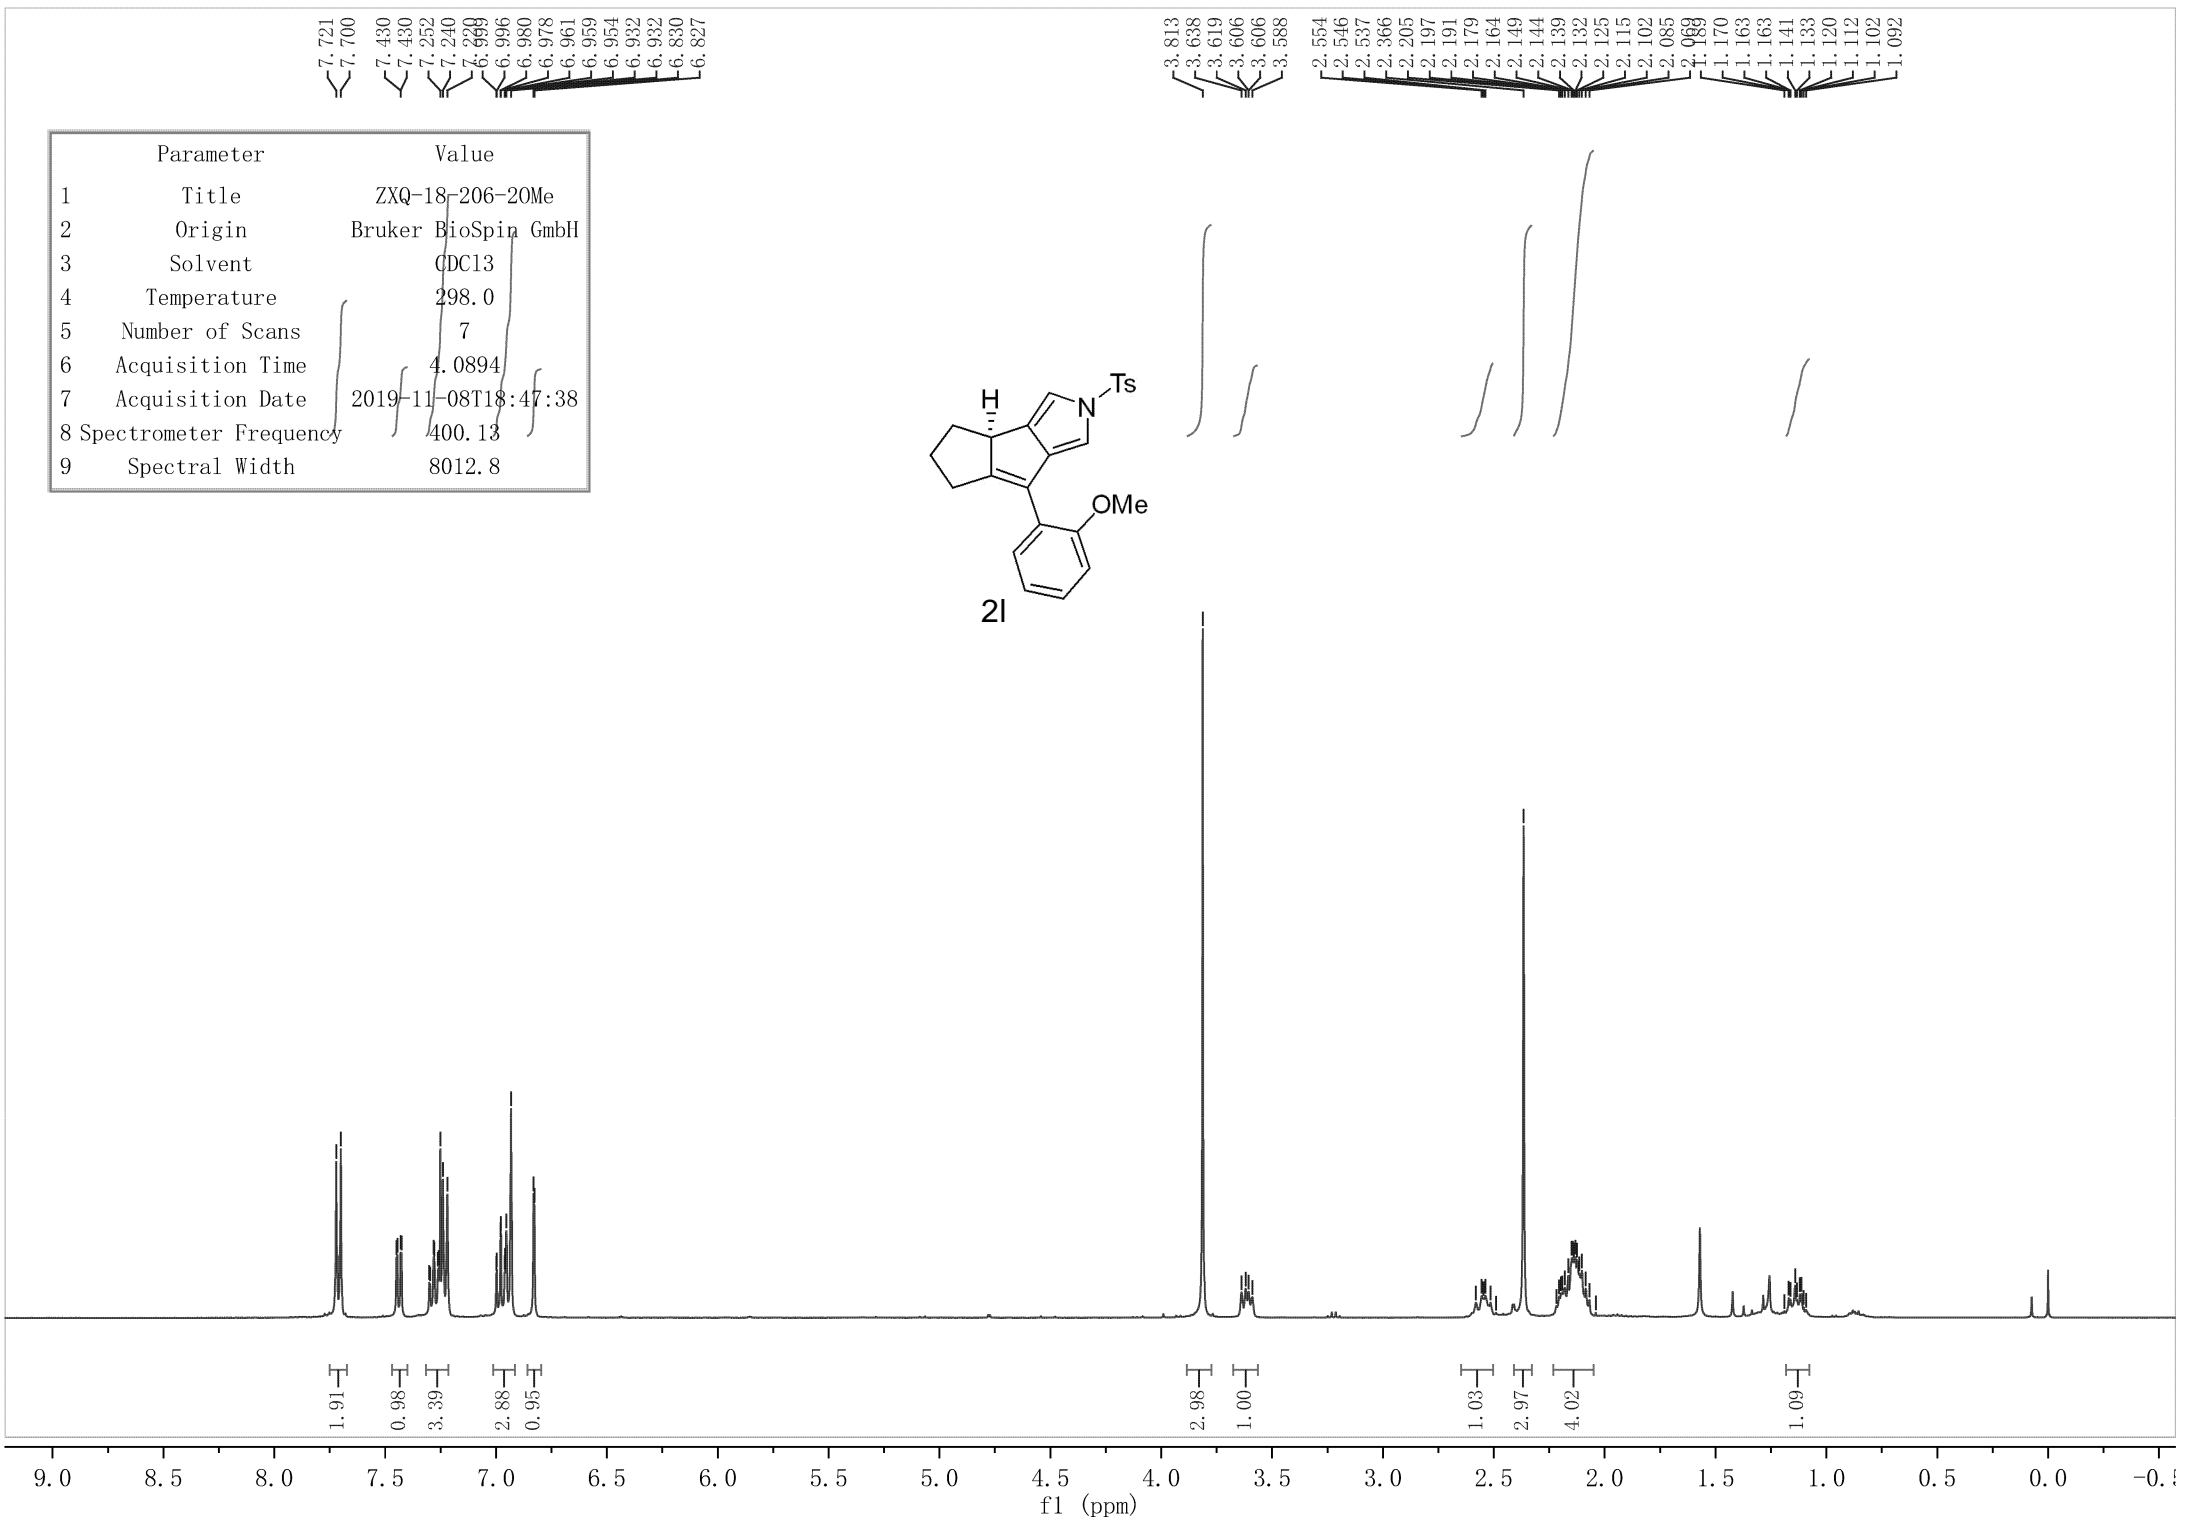

| Parameter                | Value               |
|--------------------------|---------------------|
| 1 Title                  | ZXQ-18-206-C        |
| 2 Origin                 | Bruker BioSpin GmbH |
| 3 Solvent                | CDC13               |
| 4 Temperature            | 300.0               |
| 5 Number of Scans        | 77                  |
| 6 Acquisition Time       | 1.3631              |
| 7 Acquisition Date       | 2019-11-09T16:43:31 |
| 8 Spectrometer Frequency | 100.61              |
| 9 Spectral Width         | 24038.5             |

161.82 — 156.71 —  
 144.26 142.81  
 136.64 134.89 129.69 128.61 126.65 124.19 123.79 120.40  
 113.06 111.04 108.13  
 77.32 77.00 76.68  
 55.10 49.32  
 28.83 28.31 25.07 21.51

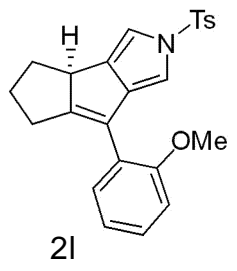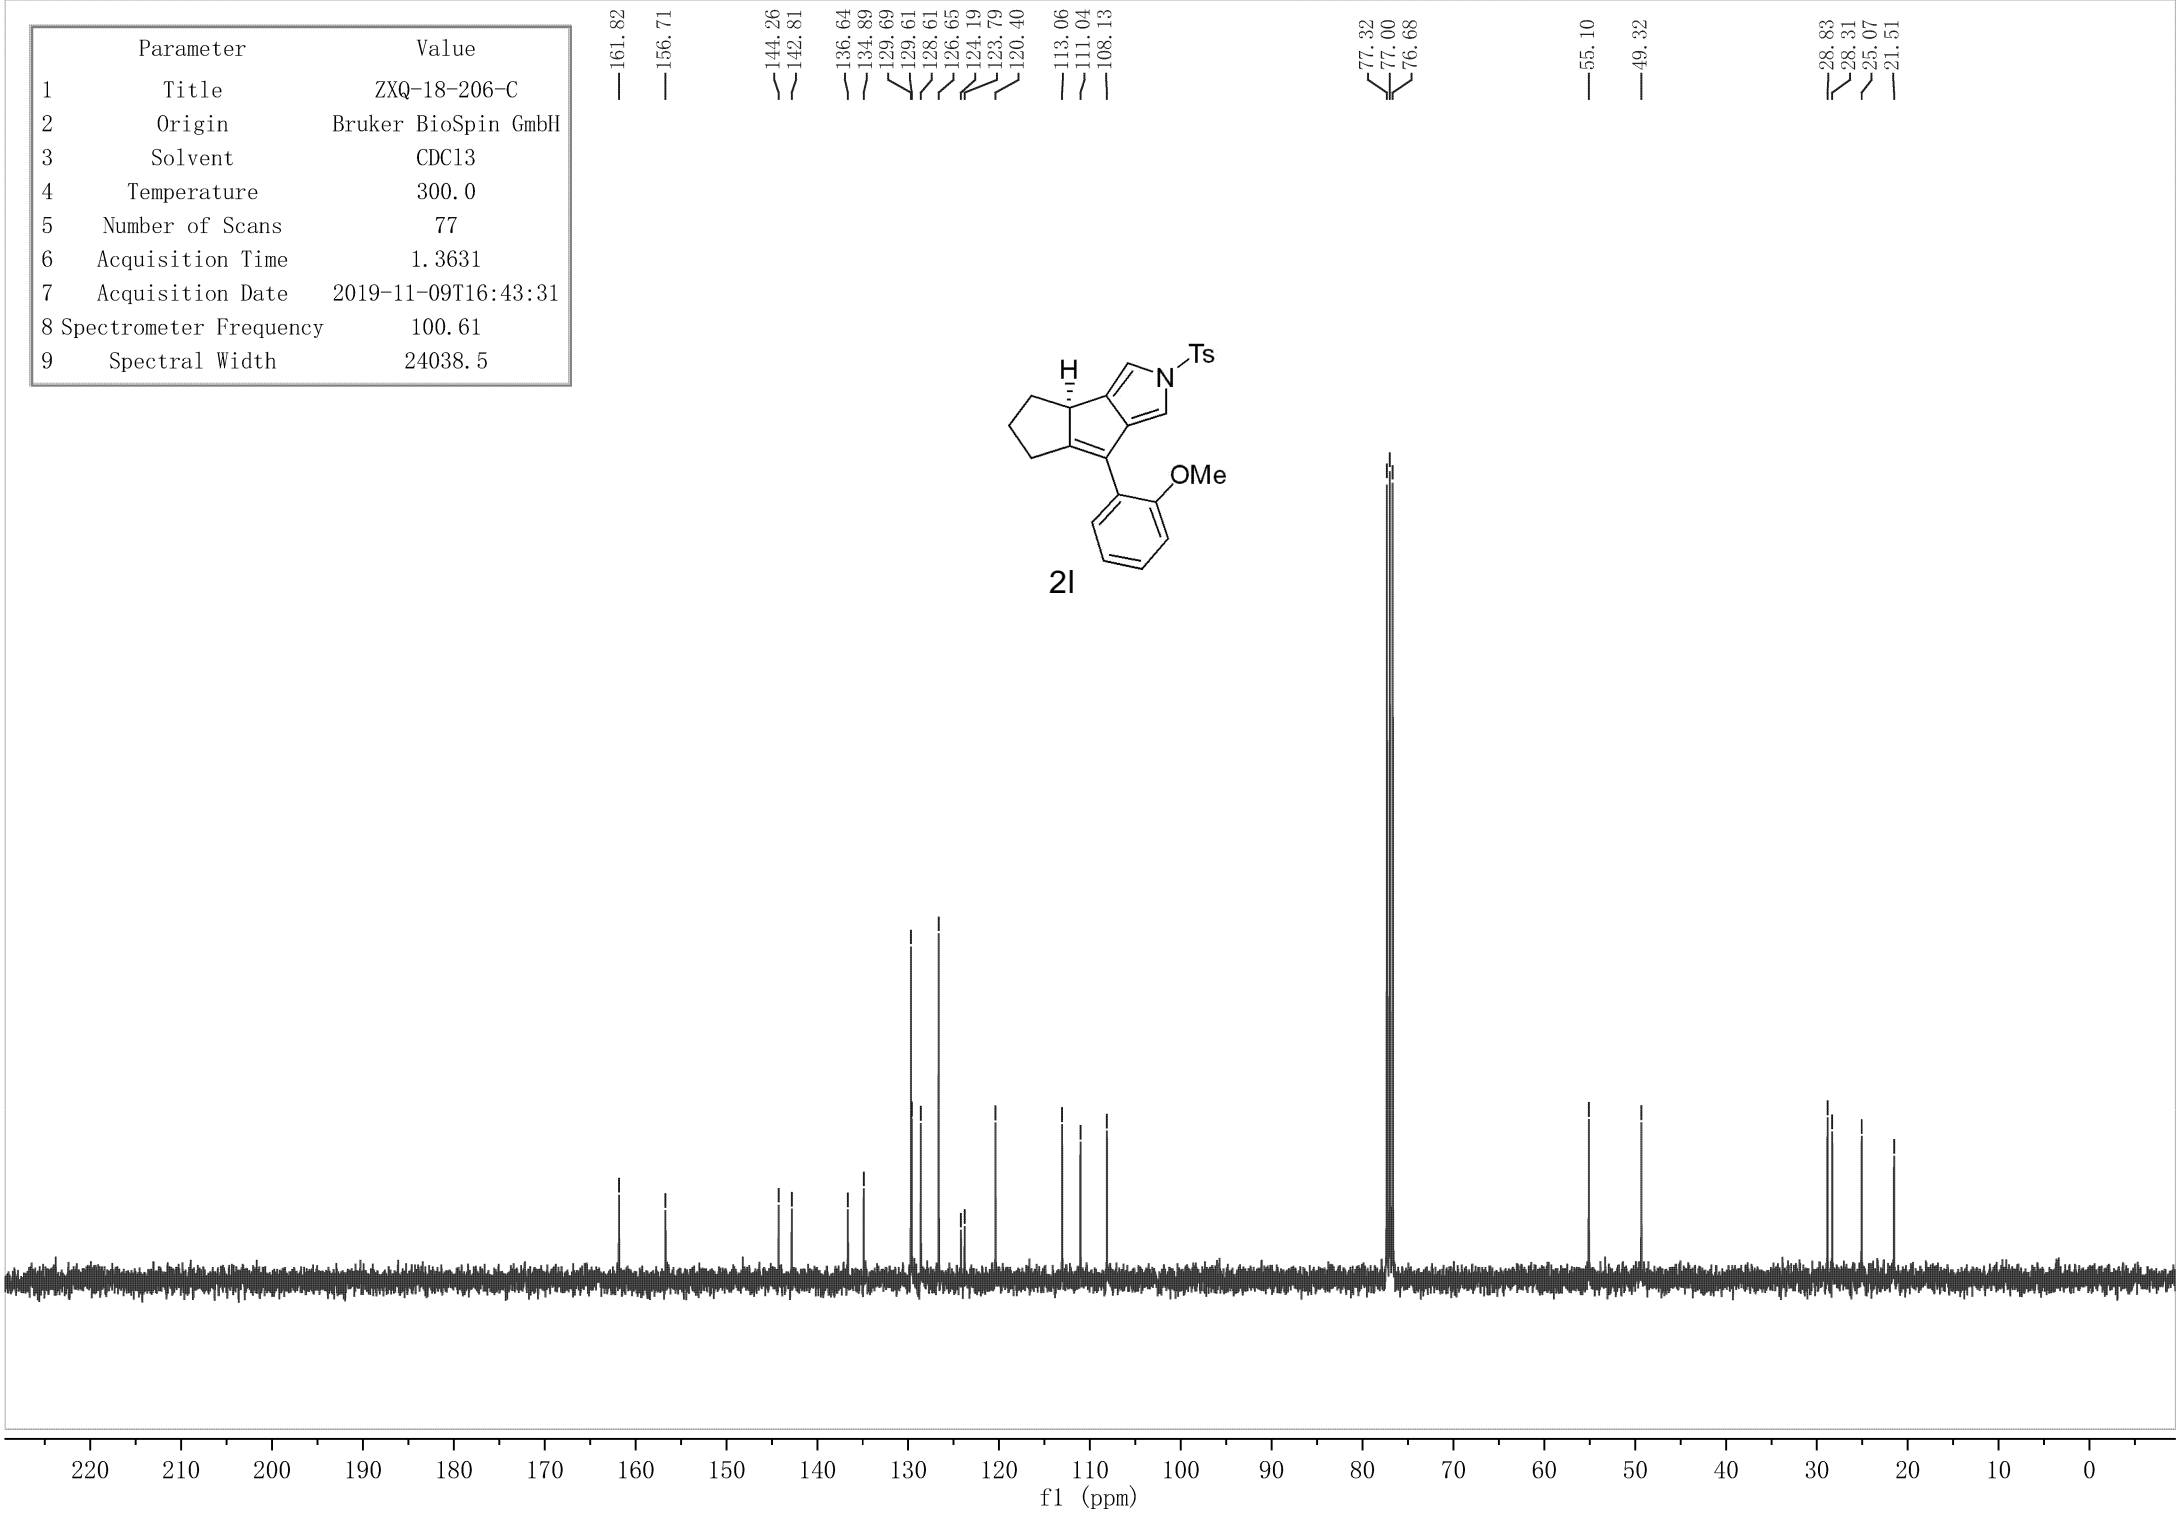



| Parameter                | Value               |
|--------------------------|---------------------|
| 1 Title                  | ZXQ-19-4            |
| 2 Origin                 | Bruker BioSpin GmbH |
| 3 Solvent                | CDC13               |
| 4 Temperature            | 298.0               |
| 5 Number of Scans        | 6                   |
| 6 Acquisition Time       | 4.0894              |
| 7 Acquisition Date       | 2019-11-13T15:37:50 |
| 8 Spectrometer Frequency | 400.13              |
| 9 Spectral Width         | 8012.8              |

7.751  
7.731  
7.326  
7.298  
7.269  
7.248  
7.242  
7.228  
7.054  
7.054  
6.963  
6.865  
6.844

3.843  
3.833  
3.572  
3.553  
3.544  
3.525  
3.525

2.737  
2.718  
2.706  
2.696  
2.679  
2.663

2.396  
2.396  
2.377  
2.356  
2.258  
2.216  
2.204  
2.201  
2.195  
2.188  
2.181  
2.174  
2.164  
2.164  
1.053  
1.029  
1.002  
0.973

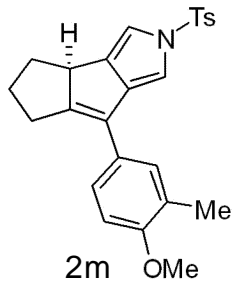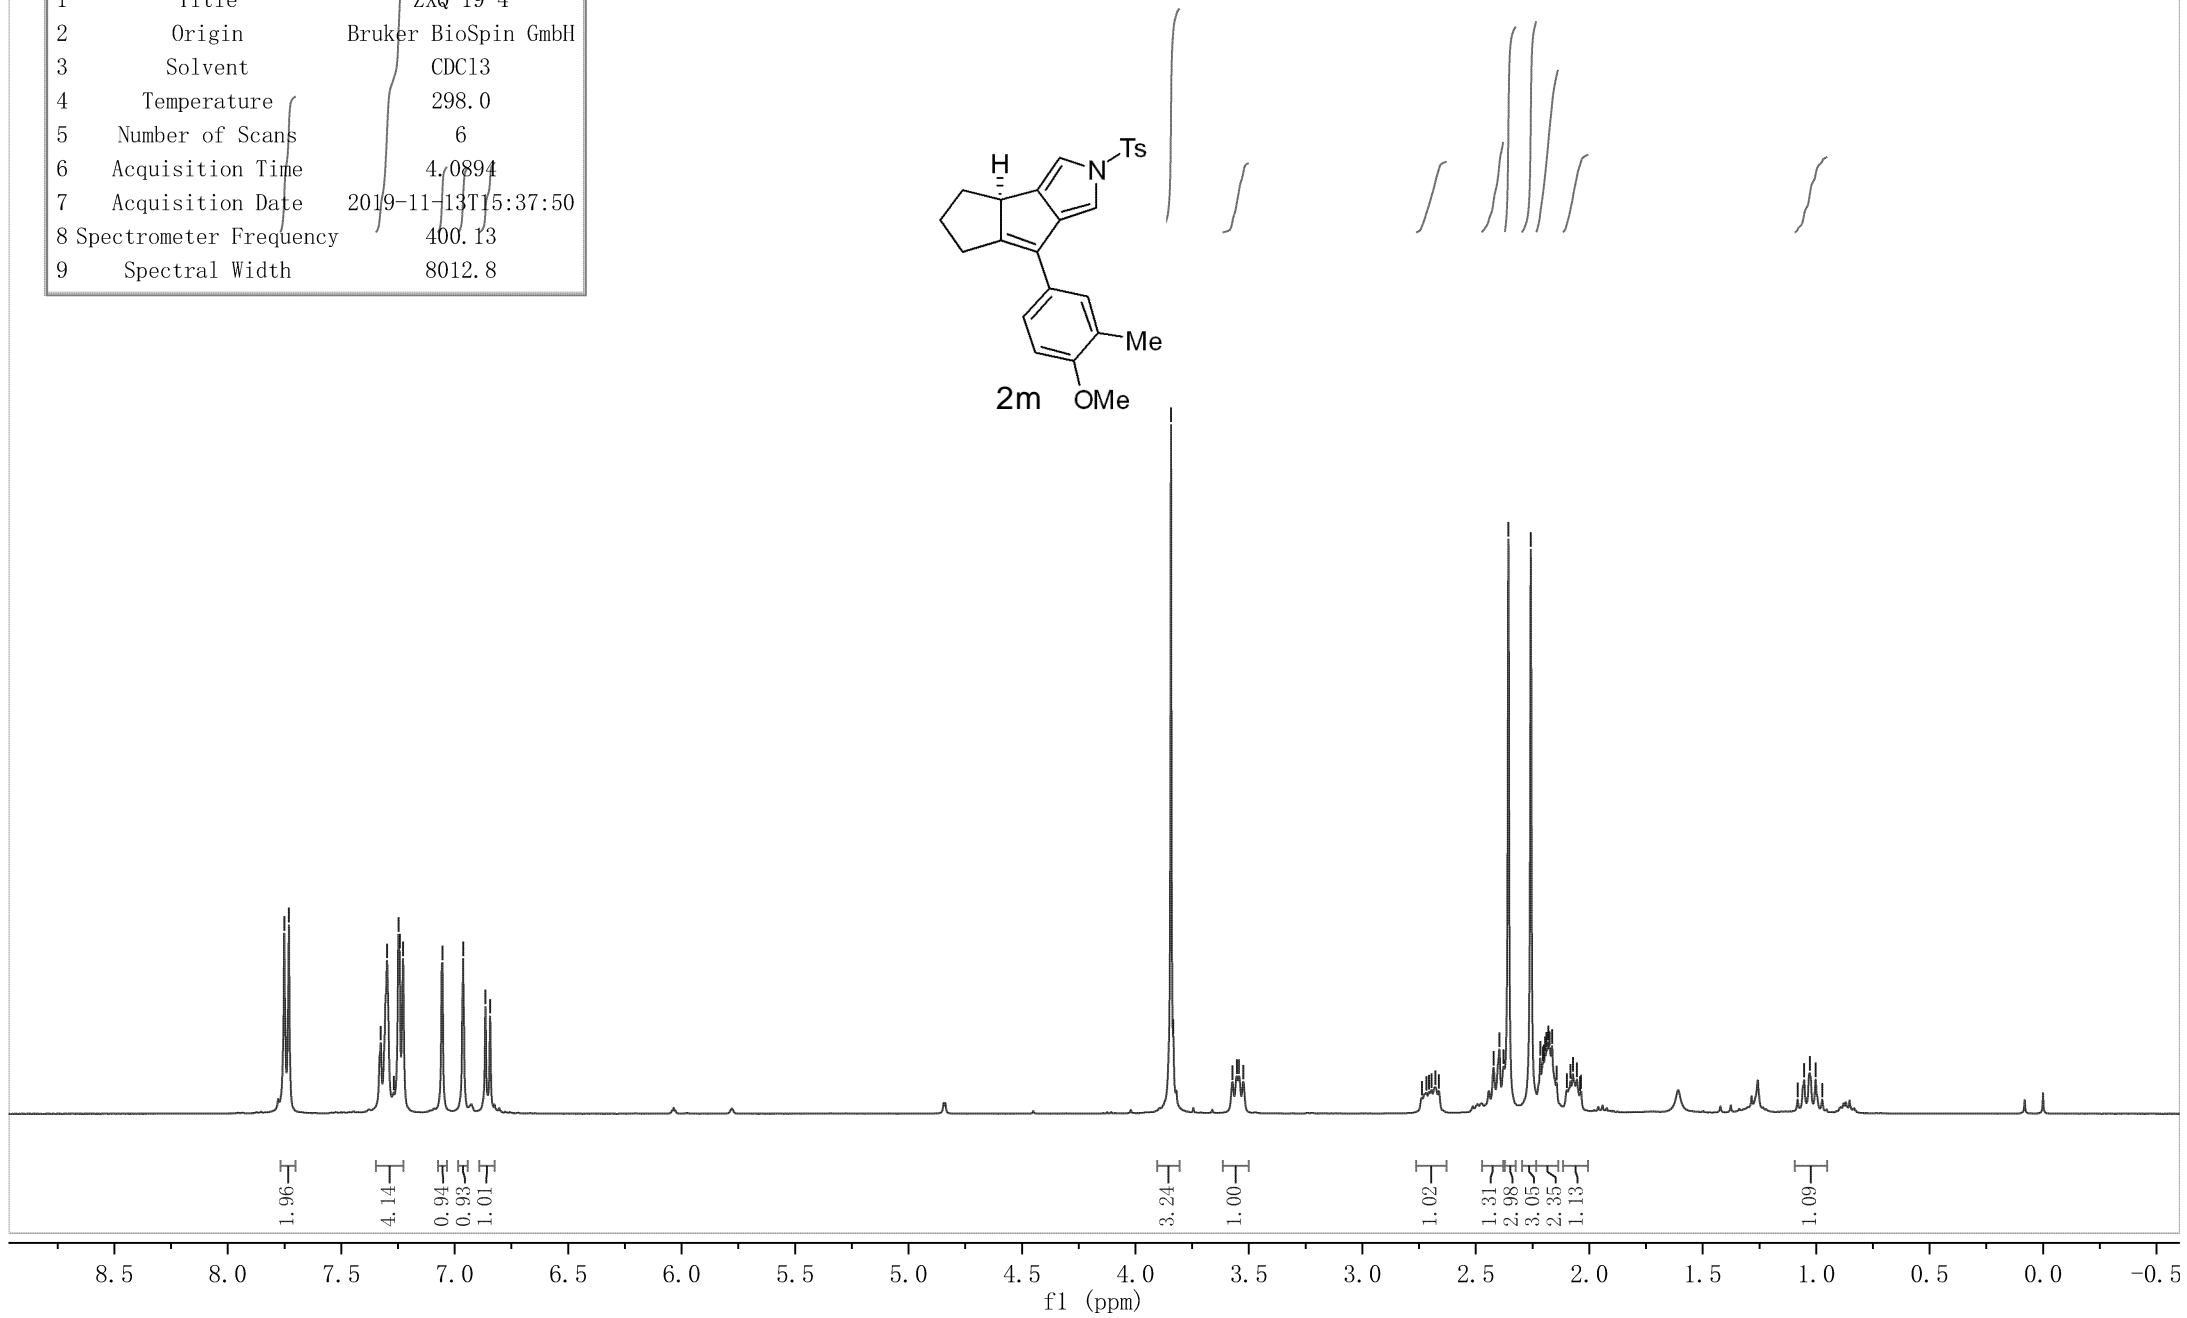

| Parameter                | Value               |
|--------------------------|---------------------|
| 1 Title                  | ZXQ-19-4-C          |
| 2 Origin                 | Bruker BioSpin GmbH |
| 3 Solvent                | CDC13               |
| 4 Temperature            | 300.0               |
| 5 Number of Scans        | 71                  |
| 6 Acquisition Time       | 1.3631              |
| 7 Acquisition Date       | 2019-11-13T15:39:34 |
| 8 Spectrometer Frequency | 100.61              |
| 9 Spectral Width         | 24038.5             |

157.53 156.96 144.36 141.64 136.53 135.03 129.76 129.54 127.50 126.99 126.65 126.57 125.85 113.21 109.87 107.79 77.32 77.00 76.68 55.34 49.55 29.55 27.83 25.00 21.49 16.34

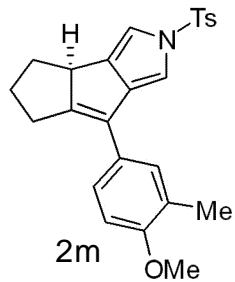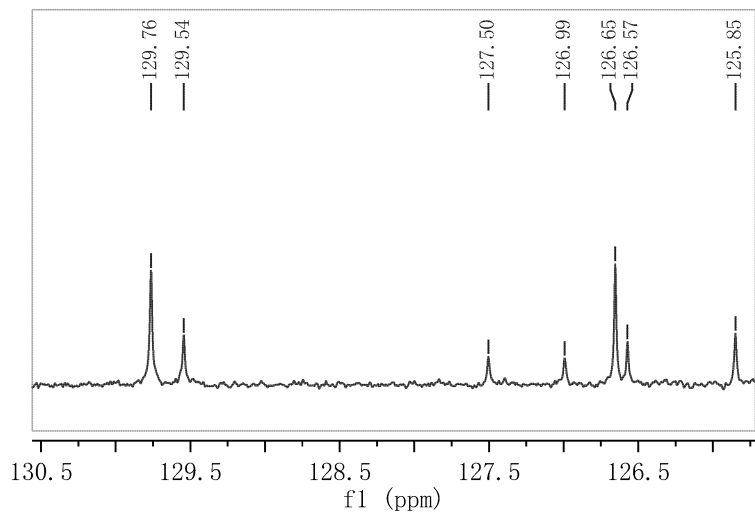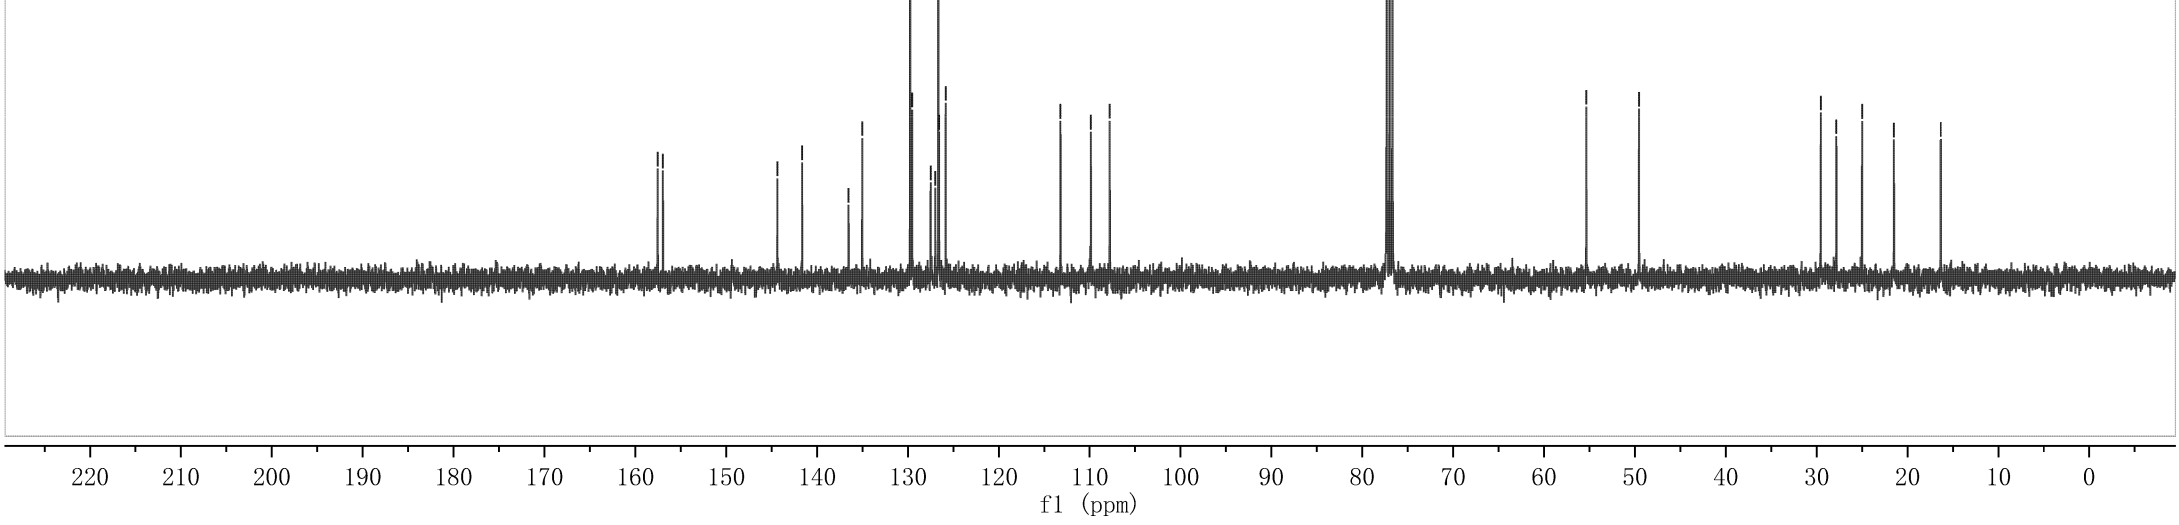

| Parameter                | Value               |
|--------------------------|---------------------|
| 1 Title                  | ZXQ-19-43           |
| 2 Origin                 | Bruker BioSpin GmbH |
| 3 Solvent                | CDC13               |
| 4 Temperature            | 298.0               |
| 5 Number of Scans        | 7                   |
| 6 Acquisition Time       | 4.0894              |
| 7 Acquisition Date       | 2019-11-25T16:18:39 |
| 8 Spectrometer Frequency | 400.13              |
| 9 Spectral Width         | 8012.8              |

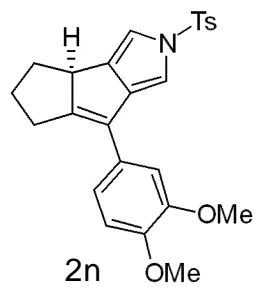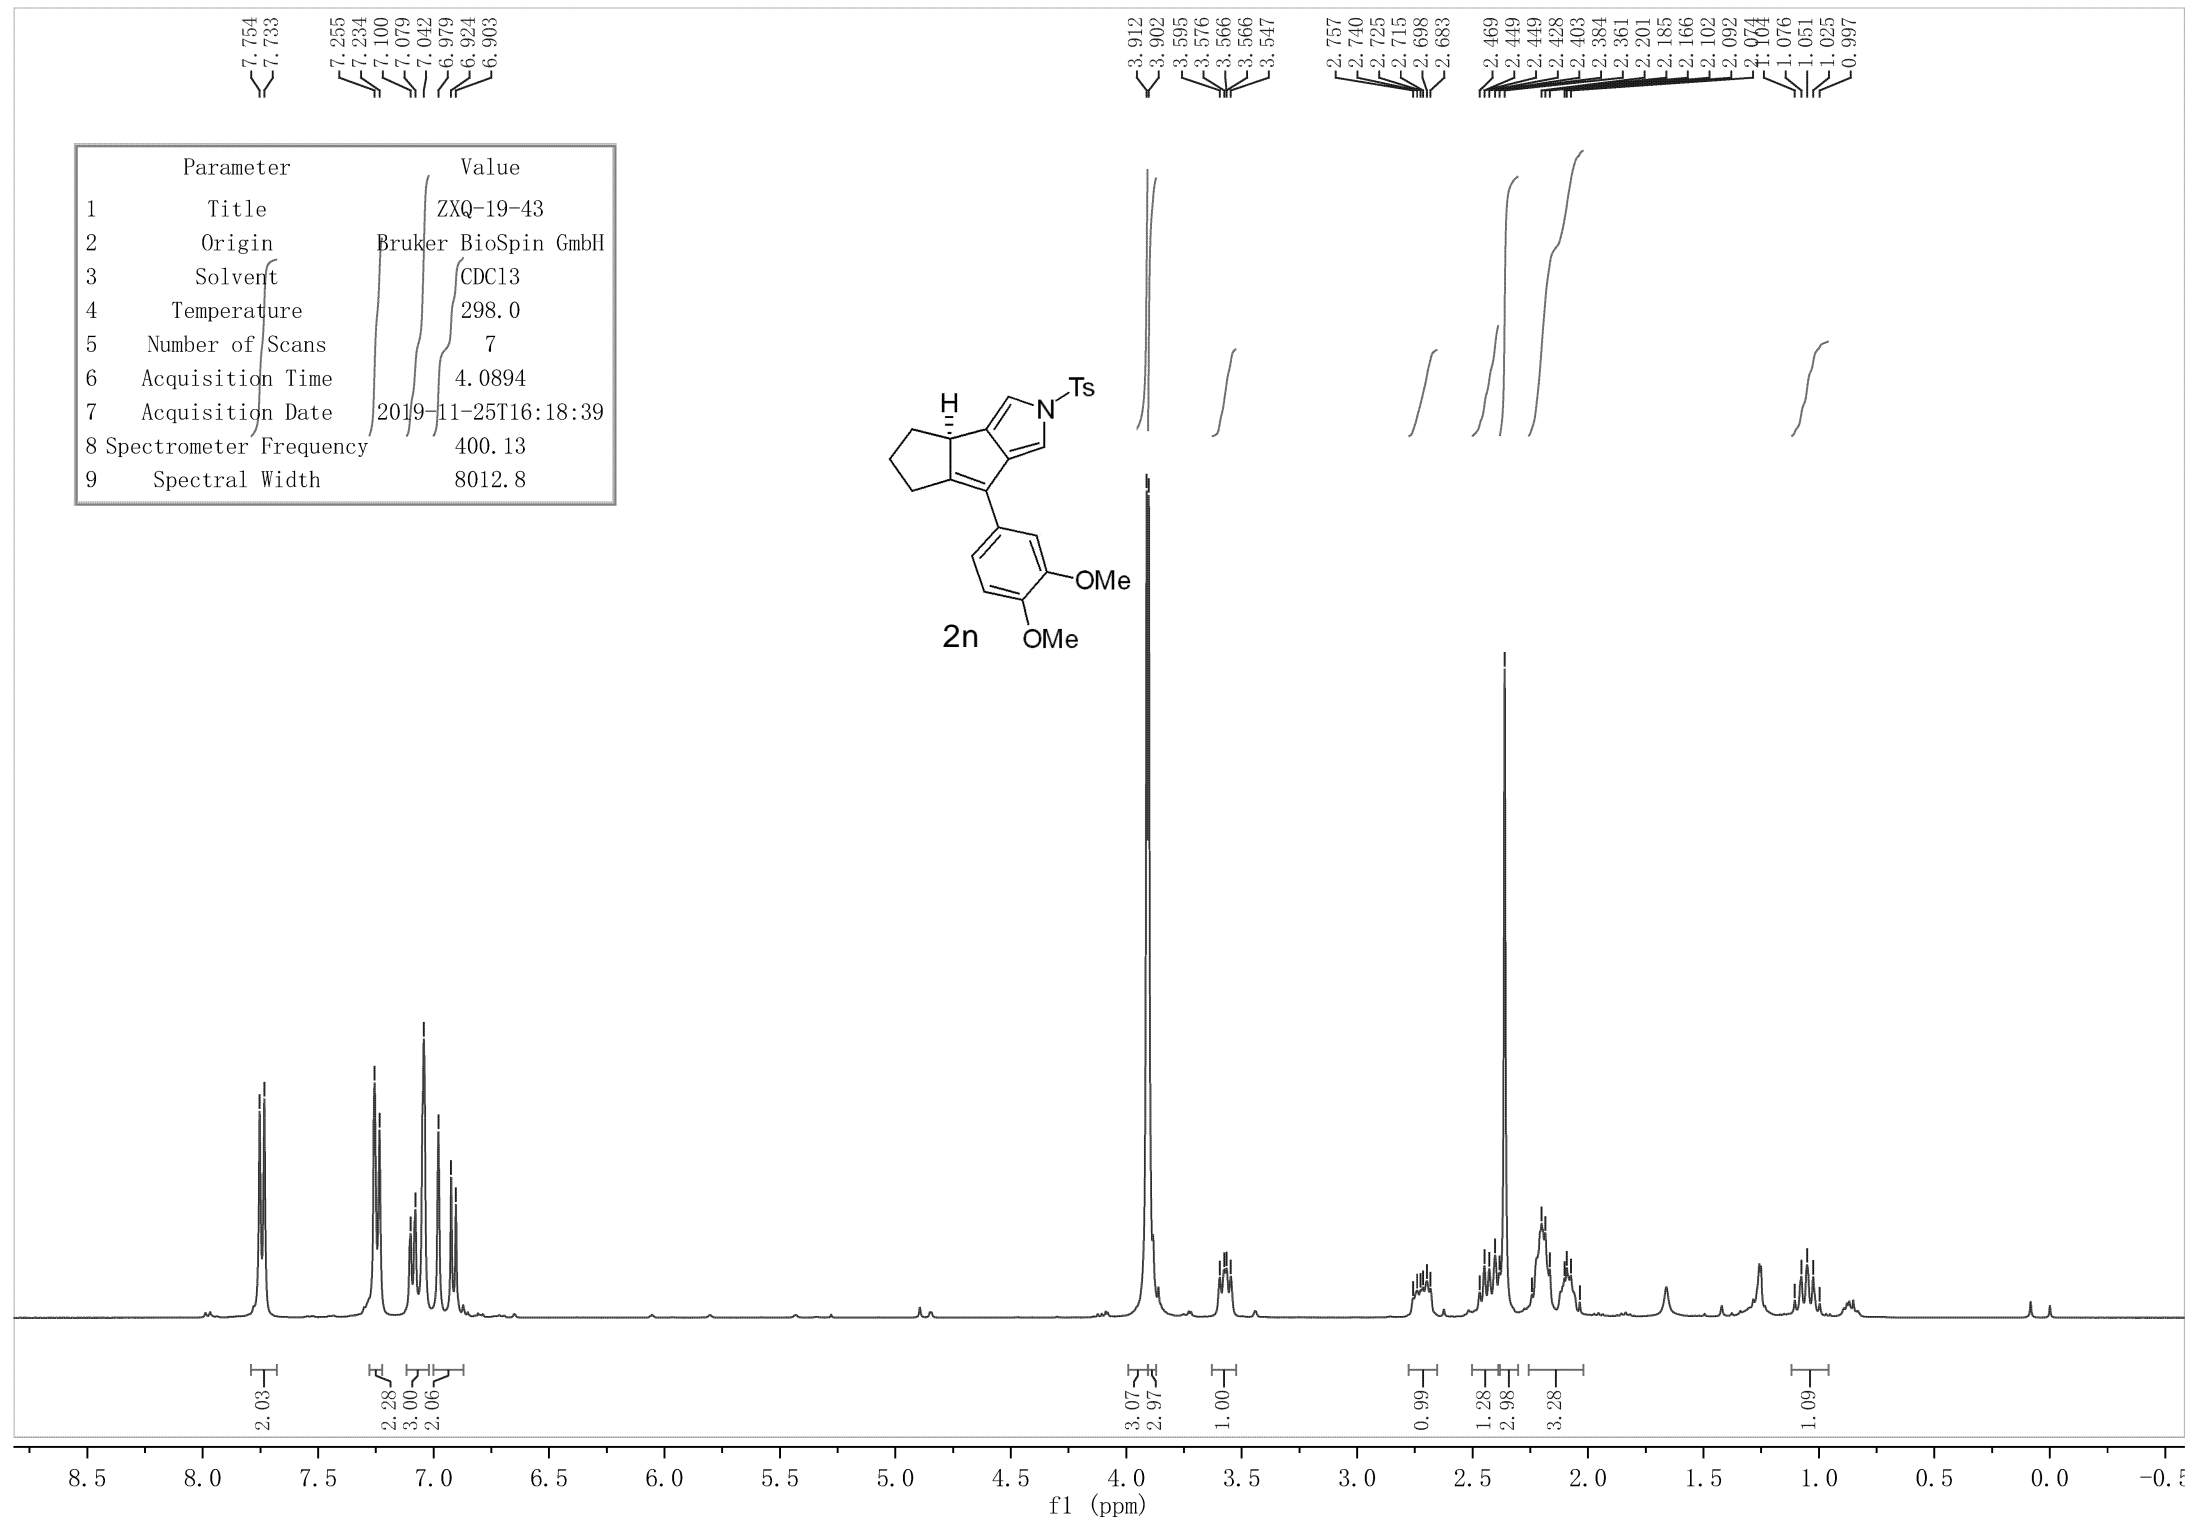

| Parameter                | Value               |
|--------------------------|---------------------|
| 1 Title                  | ZXQ-19-43-C         |
| 2 Origin                 | Bruker BioSpin GmbH |
| 3 Solvent                | CDC13               |
| 4 Temperature            | 300.0               |
| 5 Number of Scans        | 32                  |
| 6 Acquisition Time       | 1.3631              |
| 7 Acquisition Date       | 2019-11-25T16:20:25 |
| 8 Spectrometer Frequency | 100.61              |
| 9 Spectral Width         | 24038.5             |

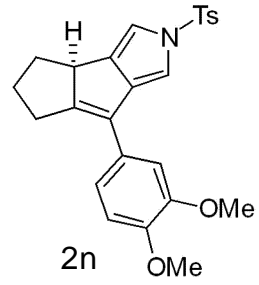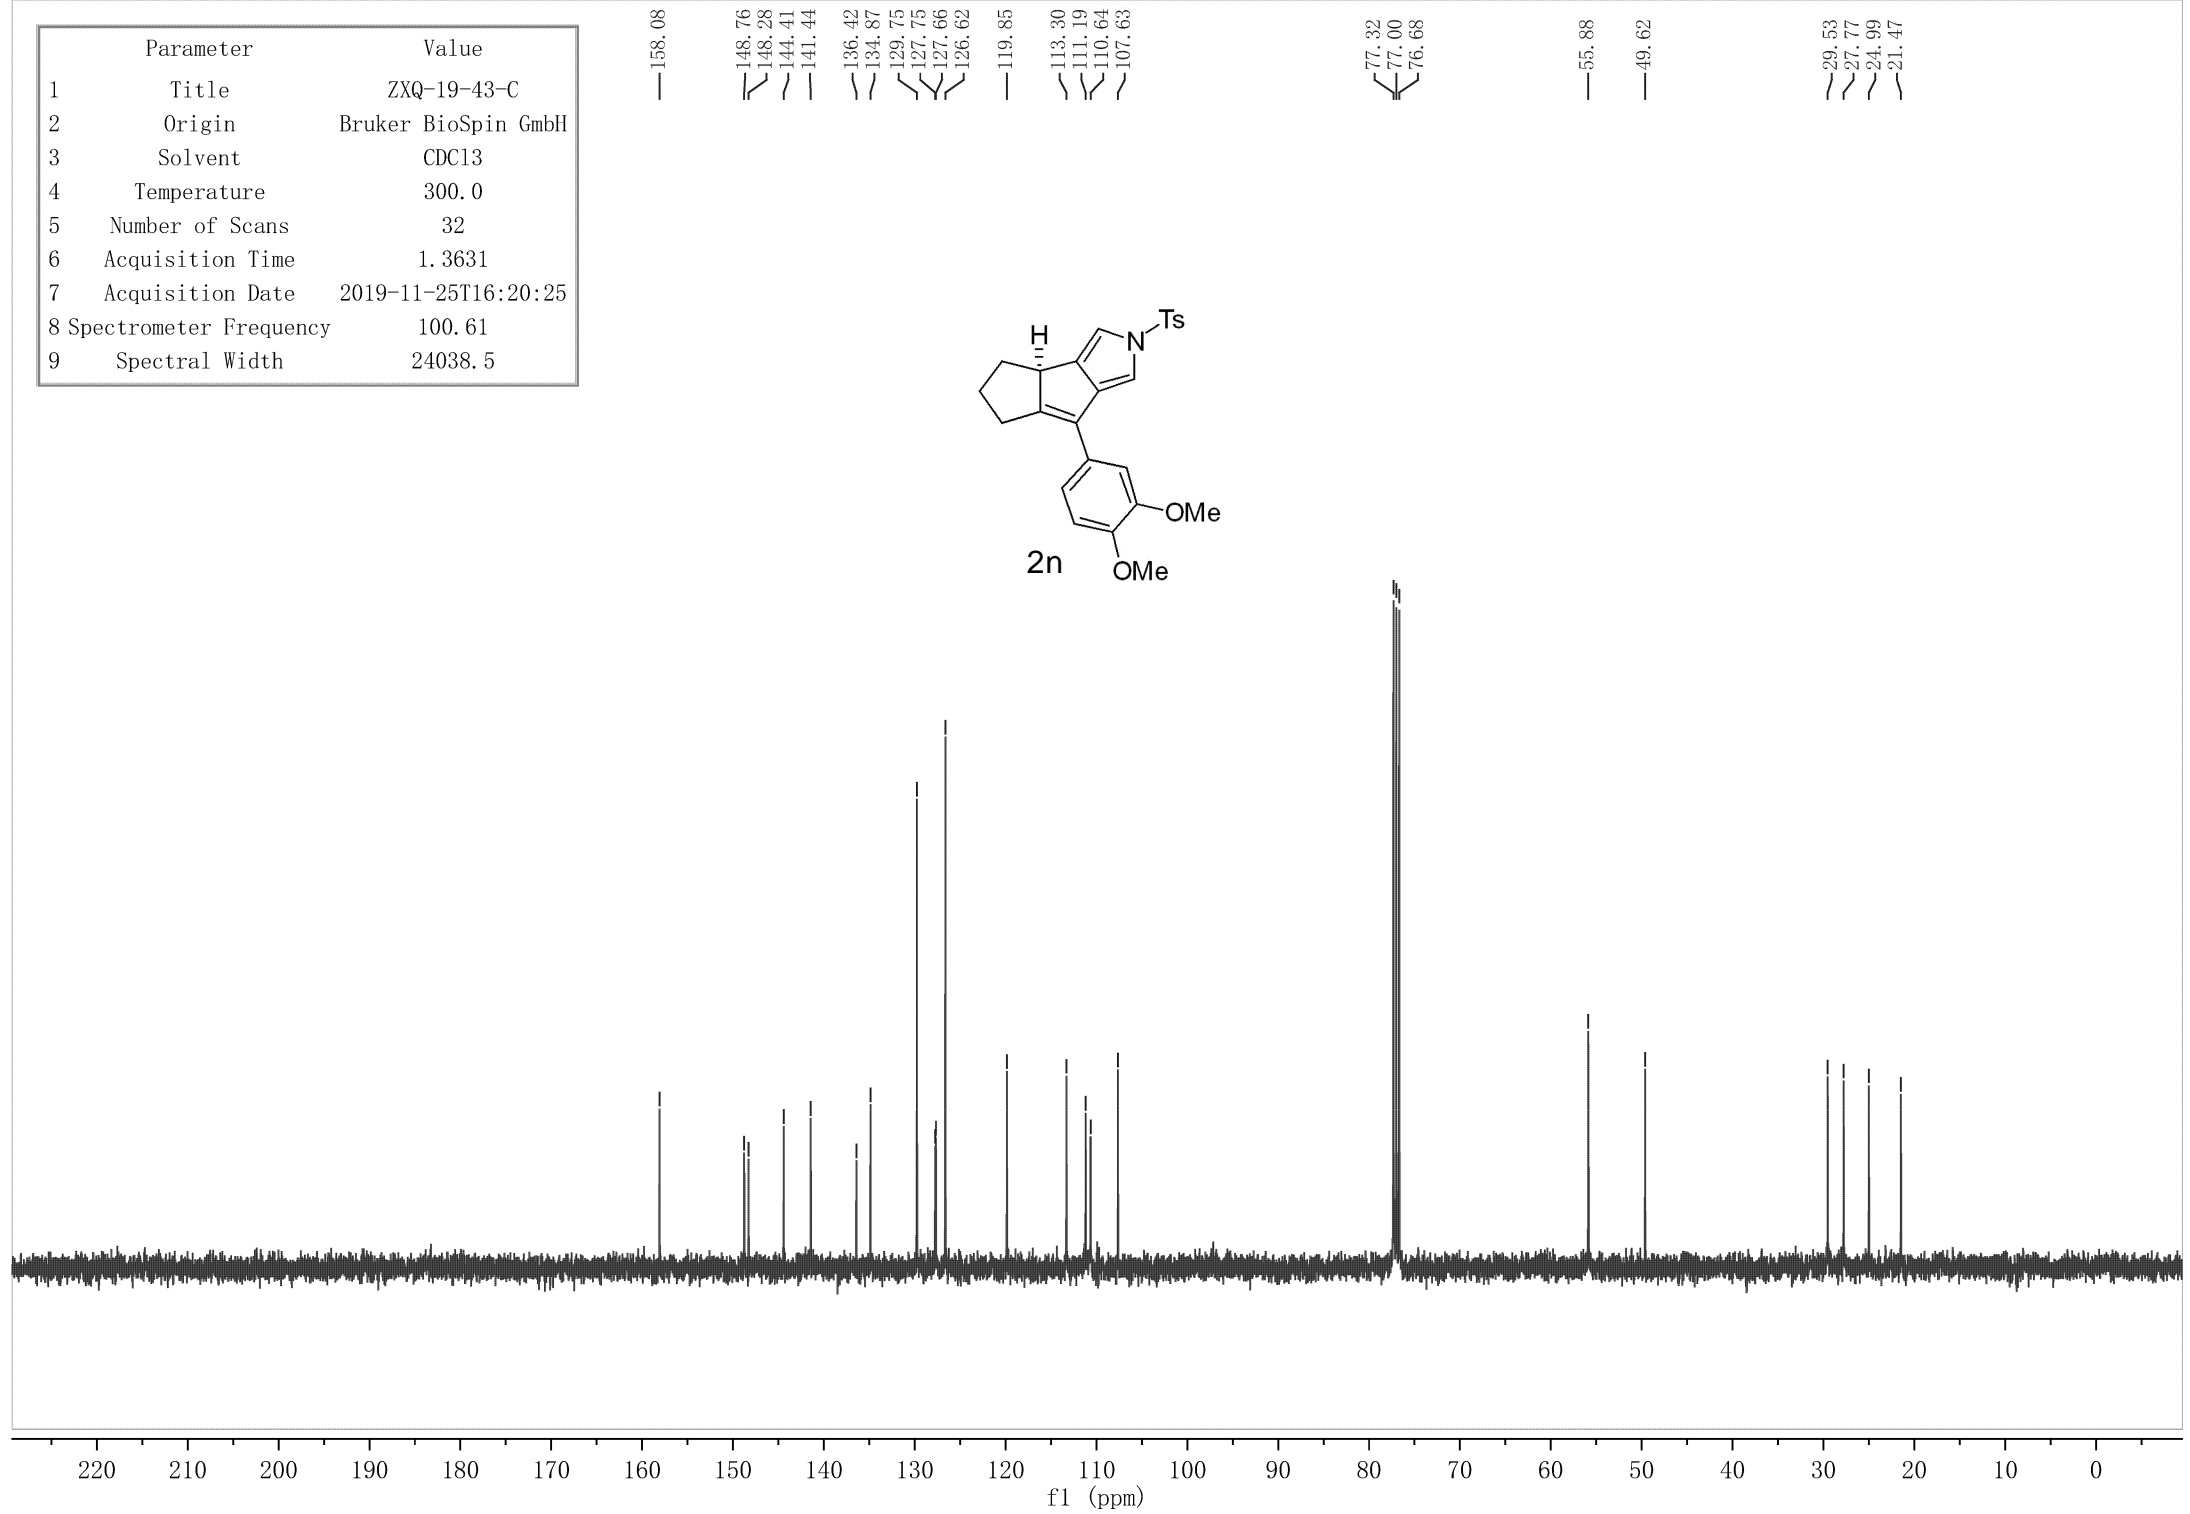

| Parameter                | Value               |
|--------------------------|---------------------|
| 1 Title                  | ZXQ-18-218-Hu       |
| 2 Origin                 | Bruker BioSpin GmbH |
| 3 Solvent                | CDC13               |
| 4 Temperature            | 298.0               |
| 5 Number of Scans        | 7                   |
| 6 Acquisition Time       | 4.0894              |
| 7 Acquisition Date       | 2019-11-09T22:28:27 |
| 8 Spectrometer Frequency | 400.13              |
| 9 Spectral Width         | 8012.8              |

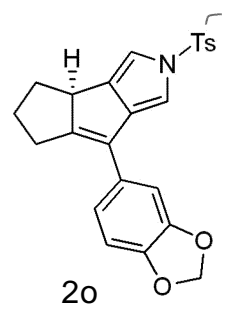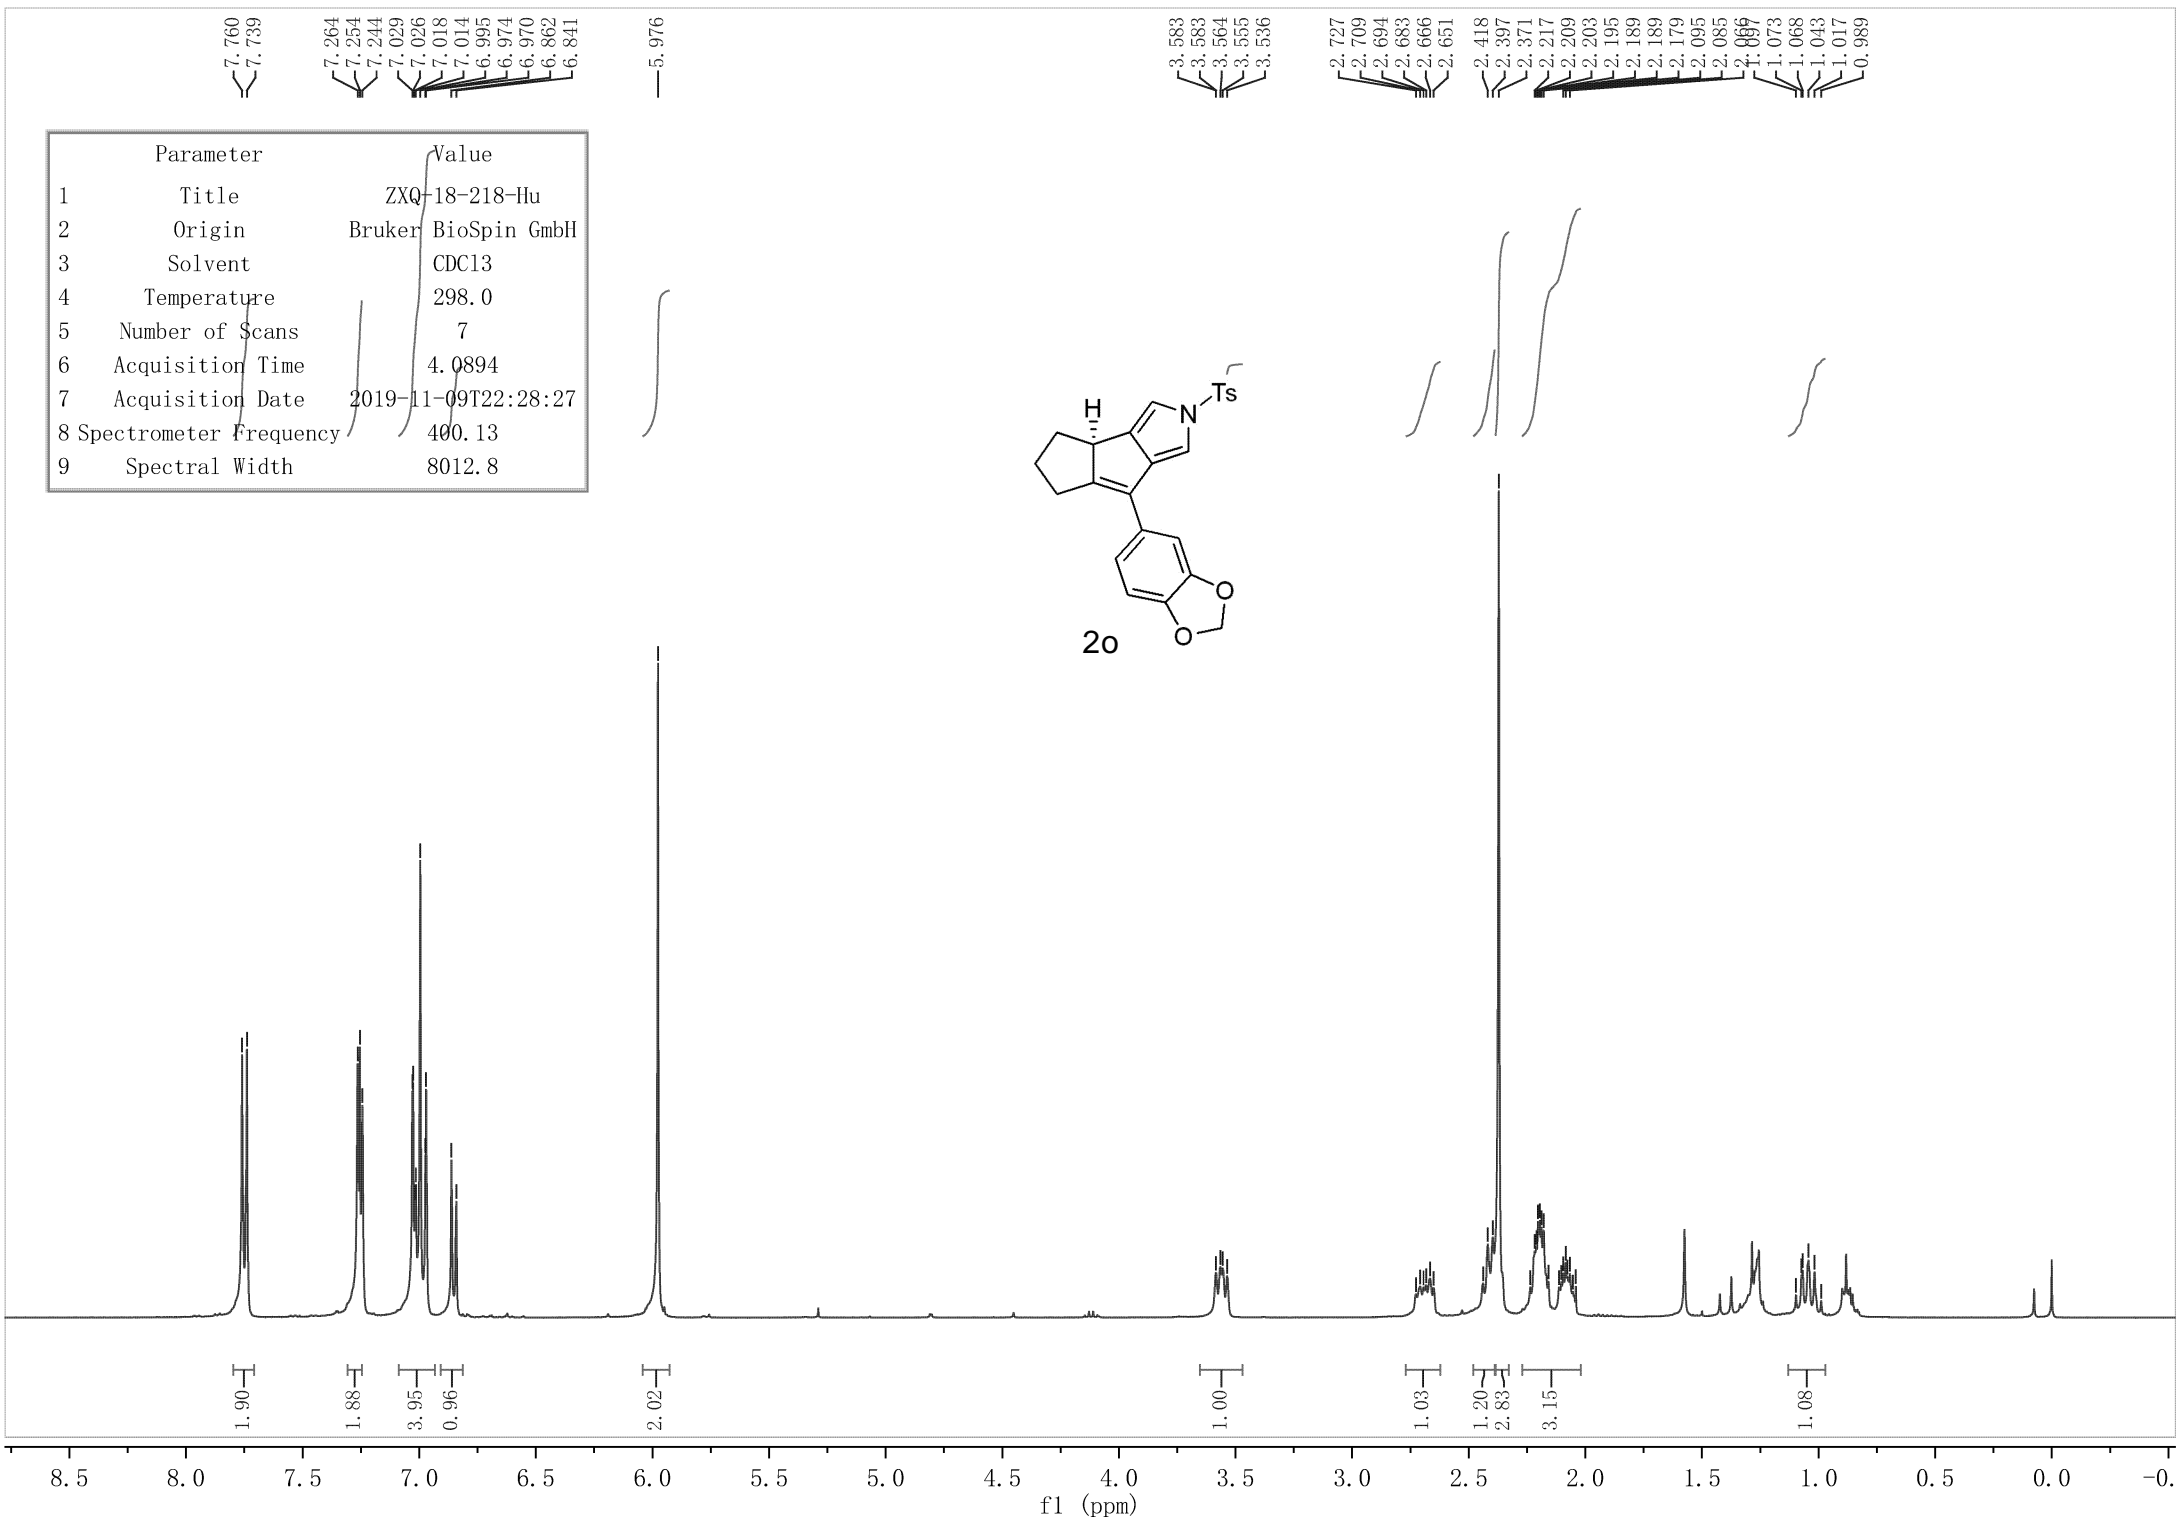

| Parameter                | Value               |
|--------------------------|---------------------|
| 1 Title                  | ZXQ-18-218-C        |
| 2 Origin                 | Bruker BioSpin GmbH |
| 3 Solvent                | CDC13               |
| 4 Temperature            | 300.0               |
| 5 Number of Scans        | 78                  |
| 6 Acquisition Time       | 1.3631              |
| 7 Acquisition Date       | 2019-11-11T17:54:49 |
| 8 Spectrometer Frequency | 100.61              |
| 9 Spectral Width         | 24038.5             |

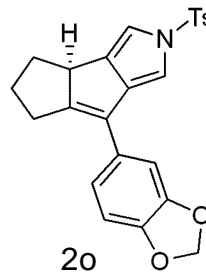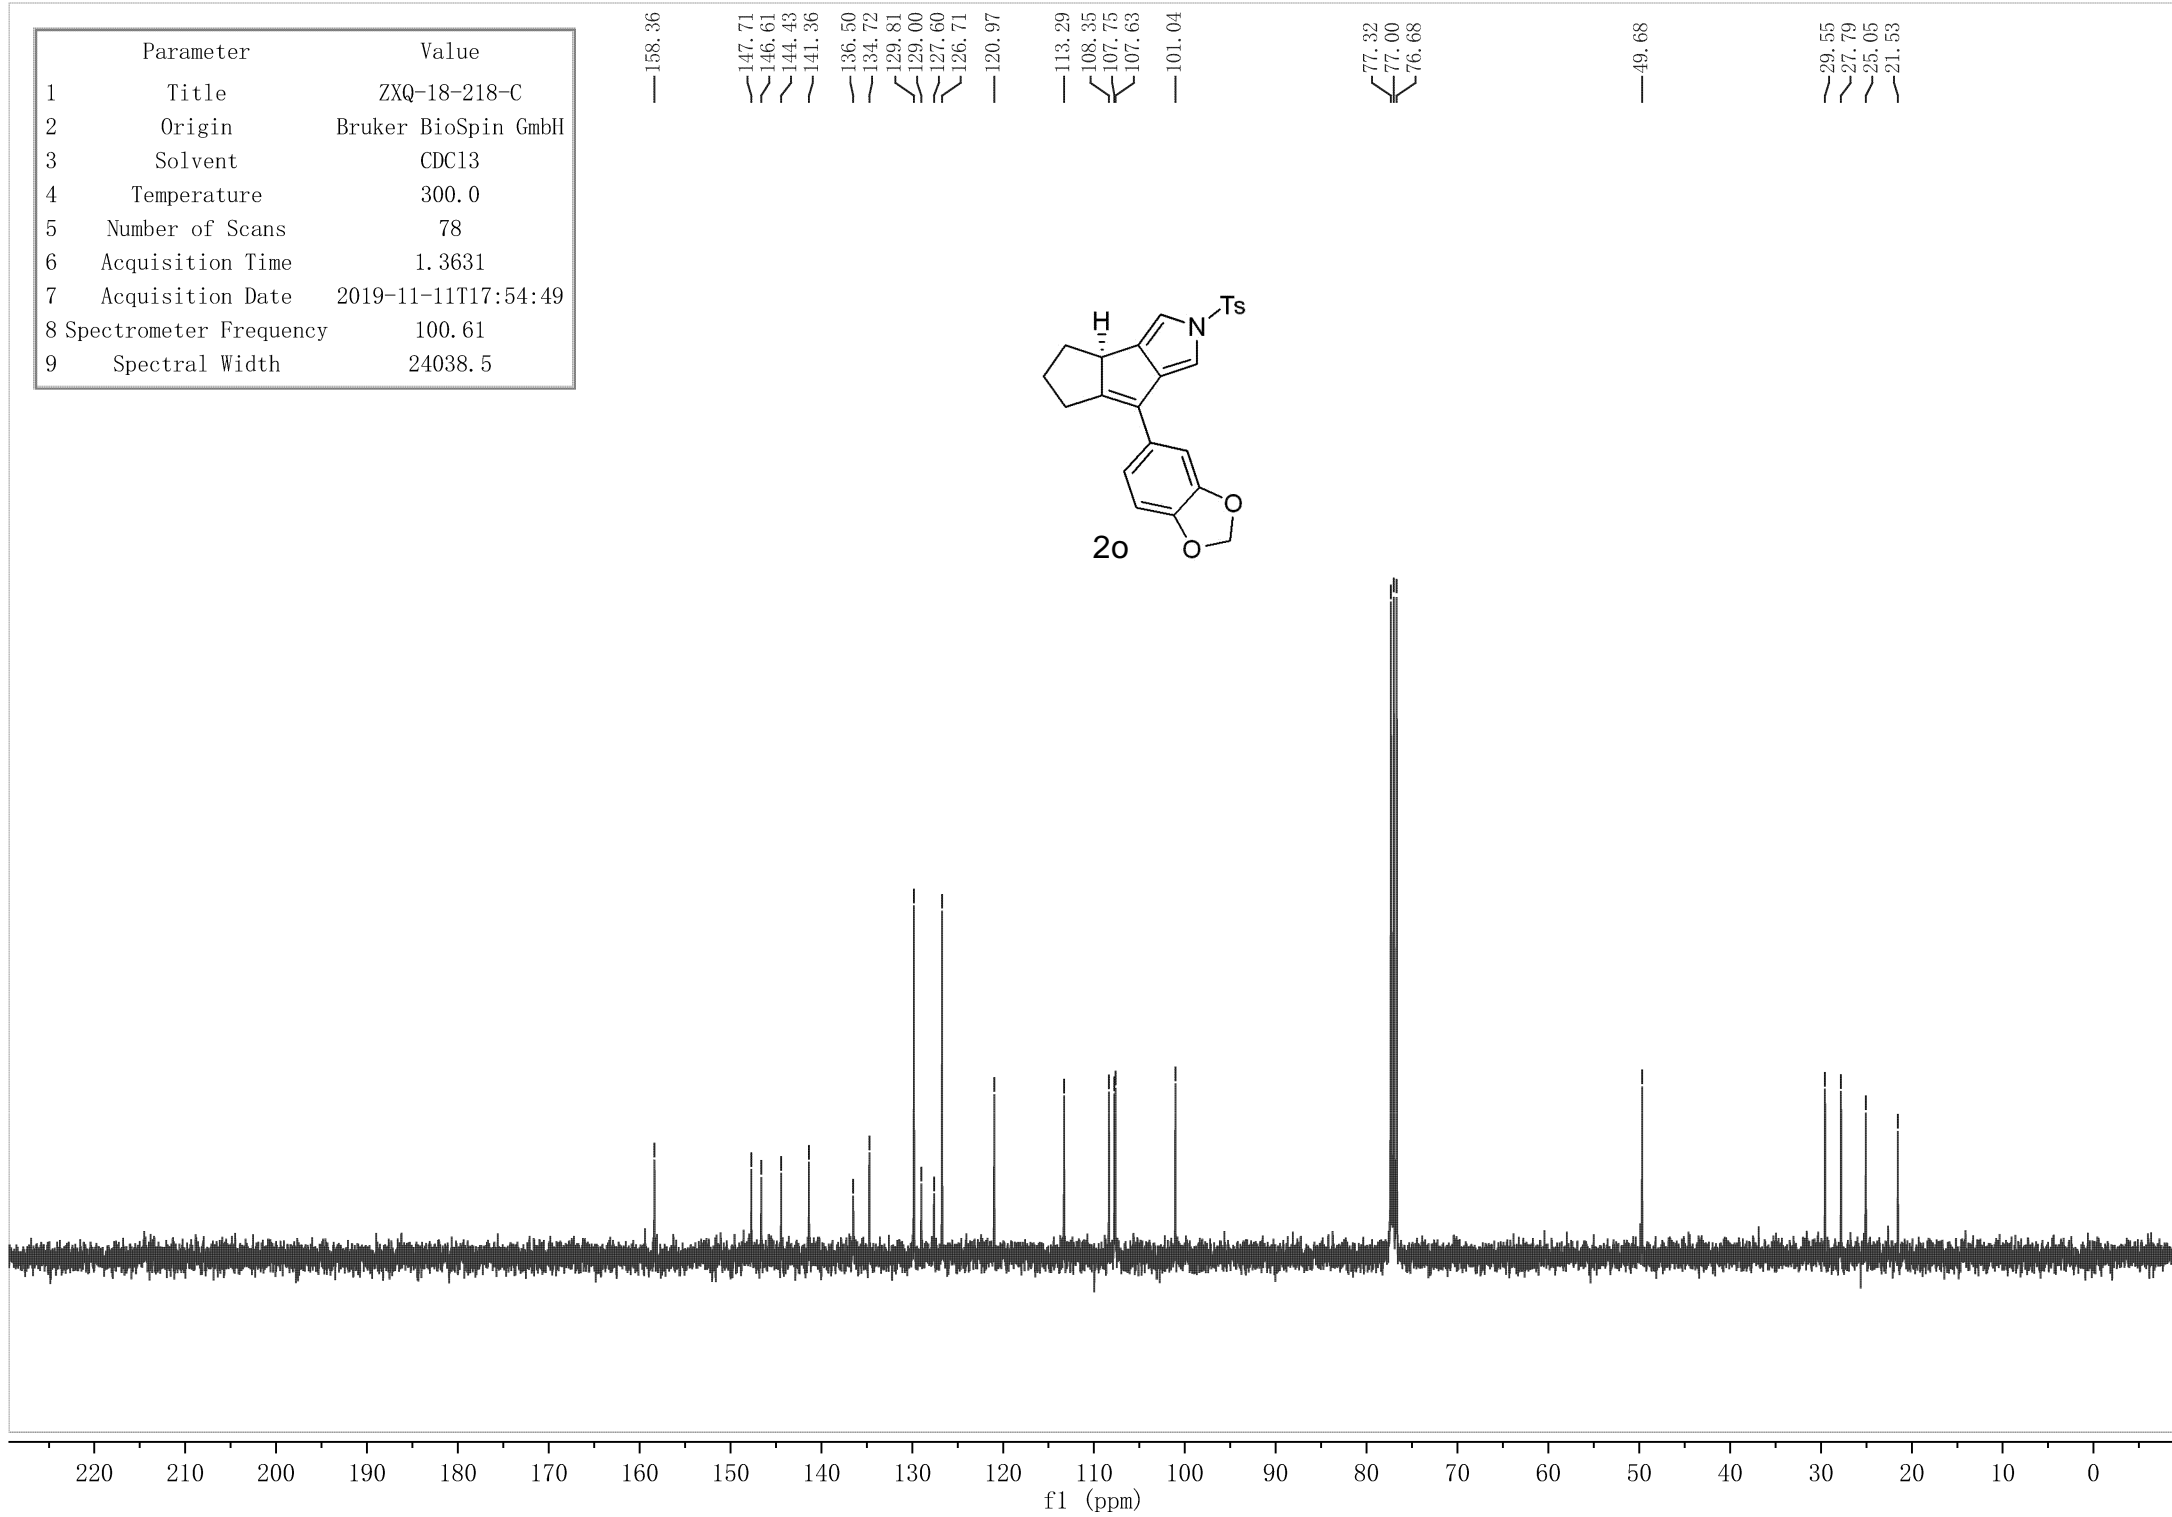

| Parameter                | Value               |
|--------------------------|---------------------|
| 1 Title                  | ZXQ-19-166          |
| 2 Origin                 | Bruker BioSpin GmbH |
| 3 Solvent                | CDC13               |
| 4 Temperature            | 298.0               |
| 5 Number of Scans        | 11                  |
| 6 Acquisition Time       | 4.0894              |
| 7 Acquisition Date       | 2019-12-28T22:11:25 |
| 8 Spectrometer Frequency | 400.13              |
| 9 Spectral Width         | 8012.8              |

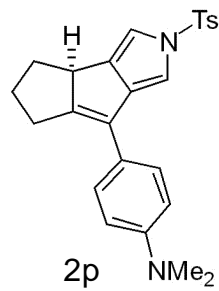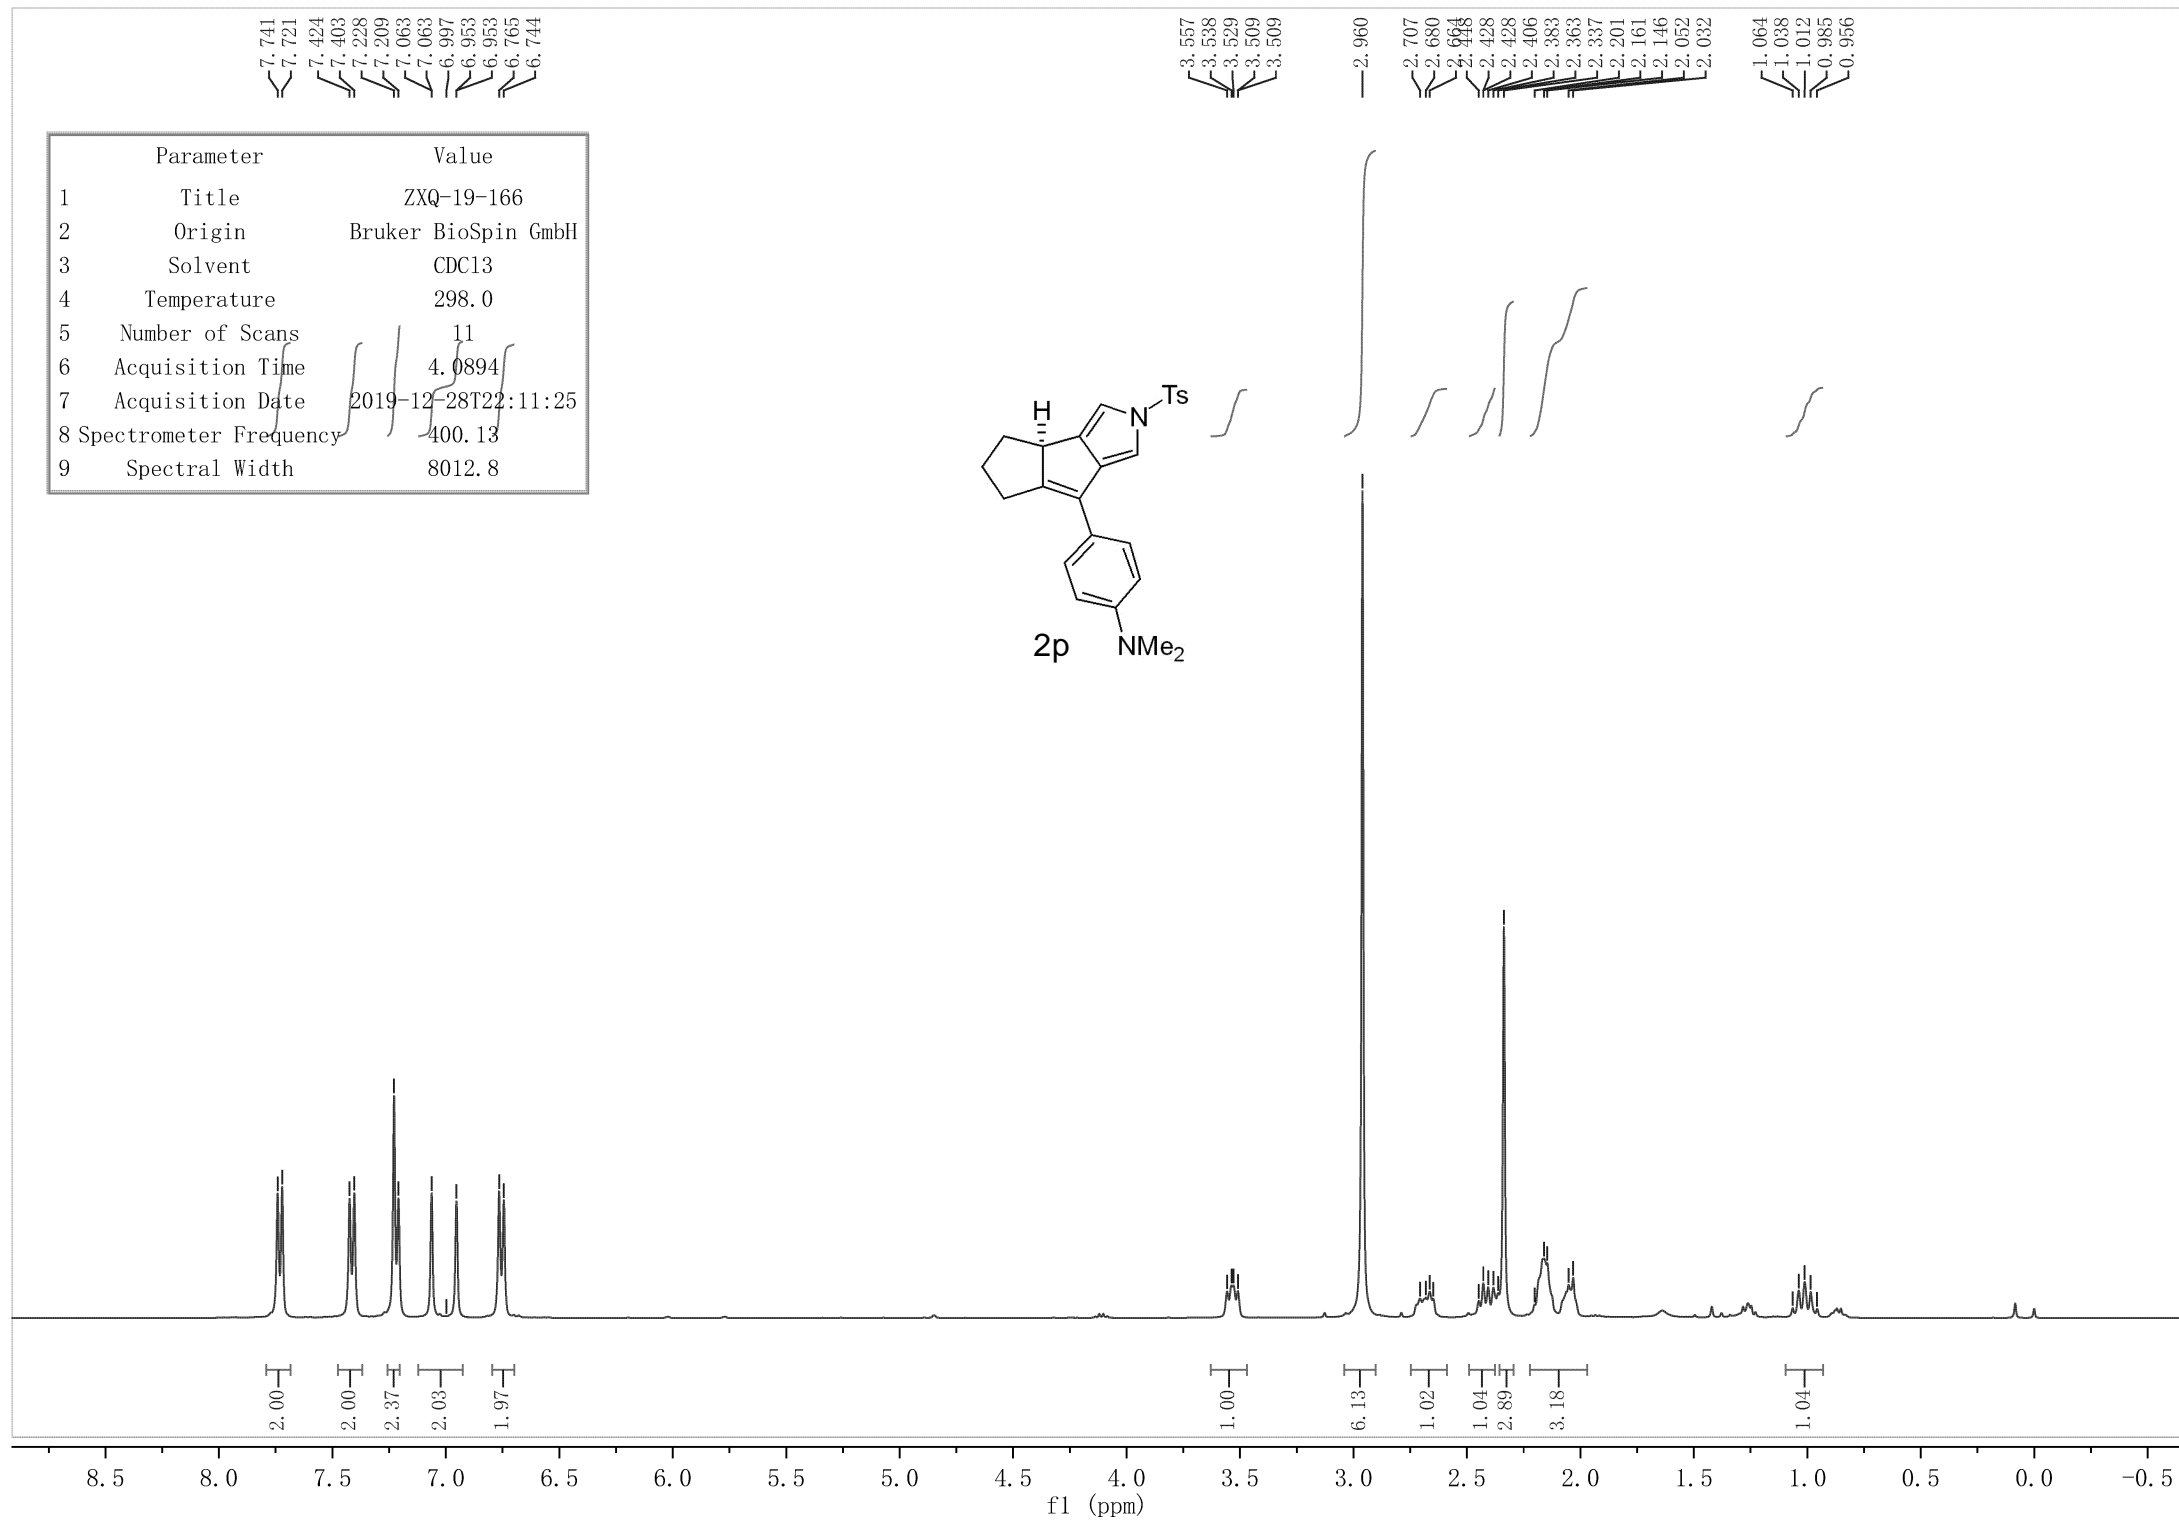

| Parameter                | Value               |
|--------------------------|---------------------|
| 1 Title                  | ZXQ-19-166-C        |
| 2 Origin                 | Bruker BioSpin GmbH |
| 3 Solvent                | CDC13               |
| 4 Temperature            | 300.0               |
| 5 Number of Scans        | 25                  |
| 6 Acquisition Time       | 1.3631              |
| 7 Acquisition Date       | 2019-12-28T22:12:57 |
| 8 Spectrometer Frequency | 100.61              |
| 9 Spectral Width         | 24038.5             |

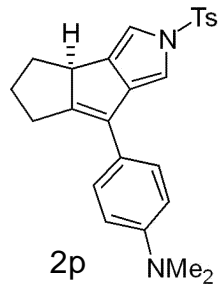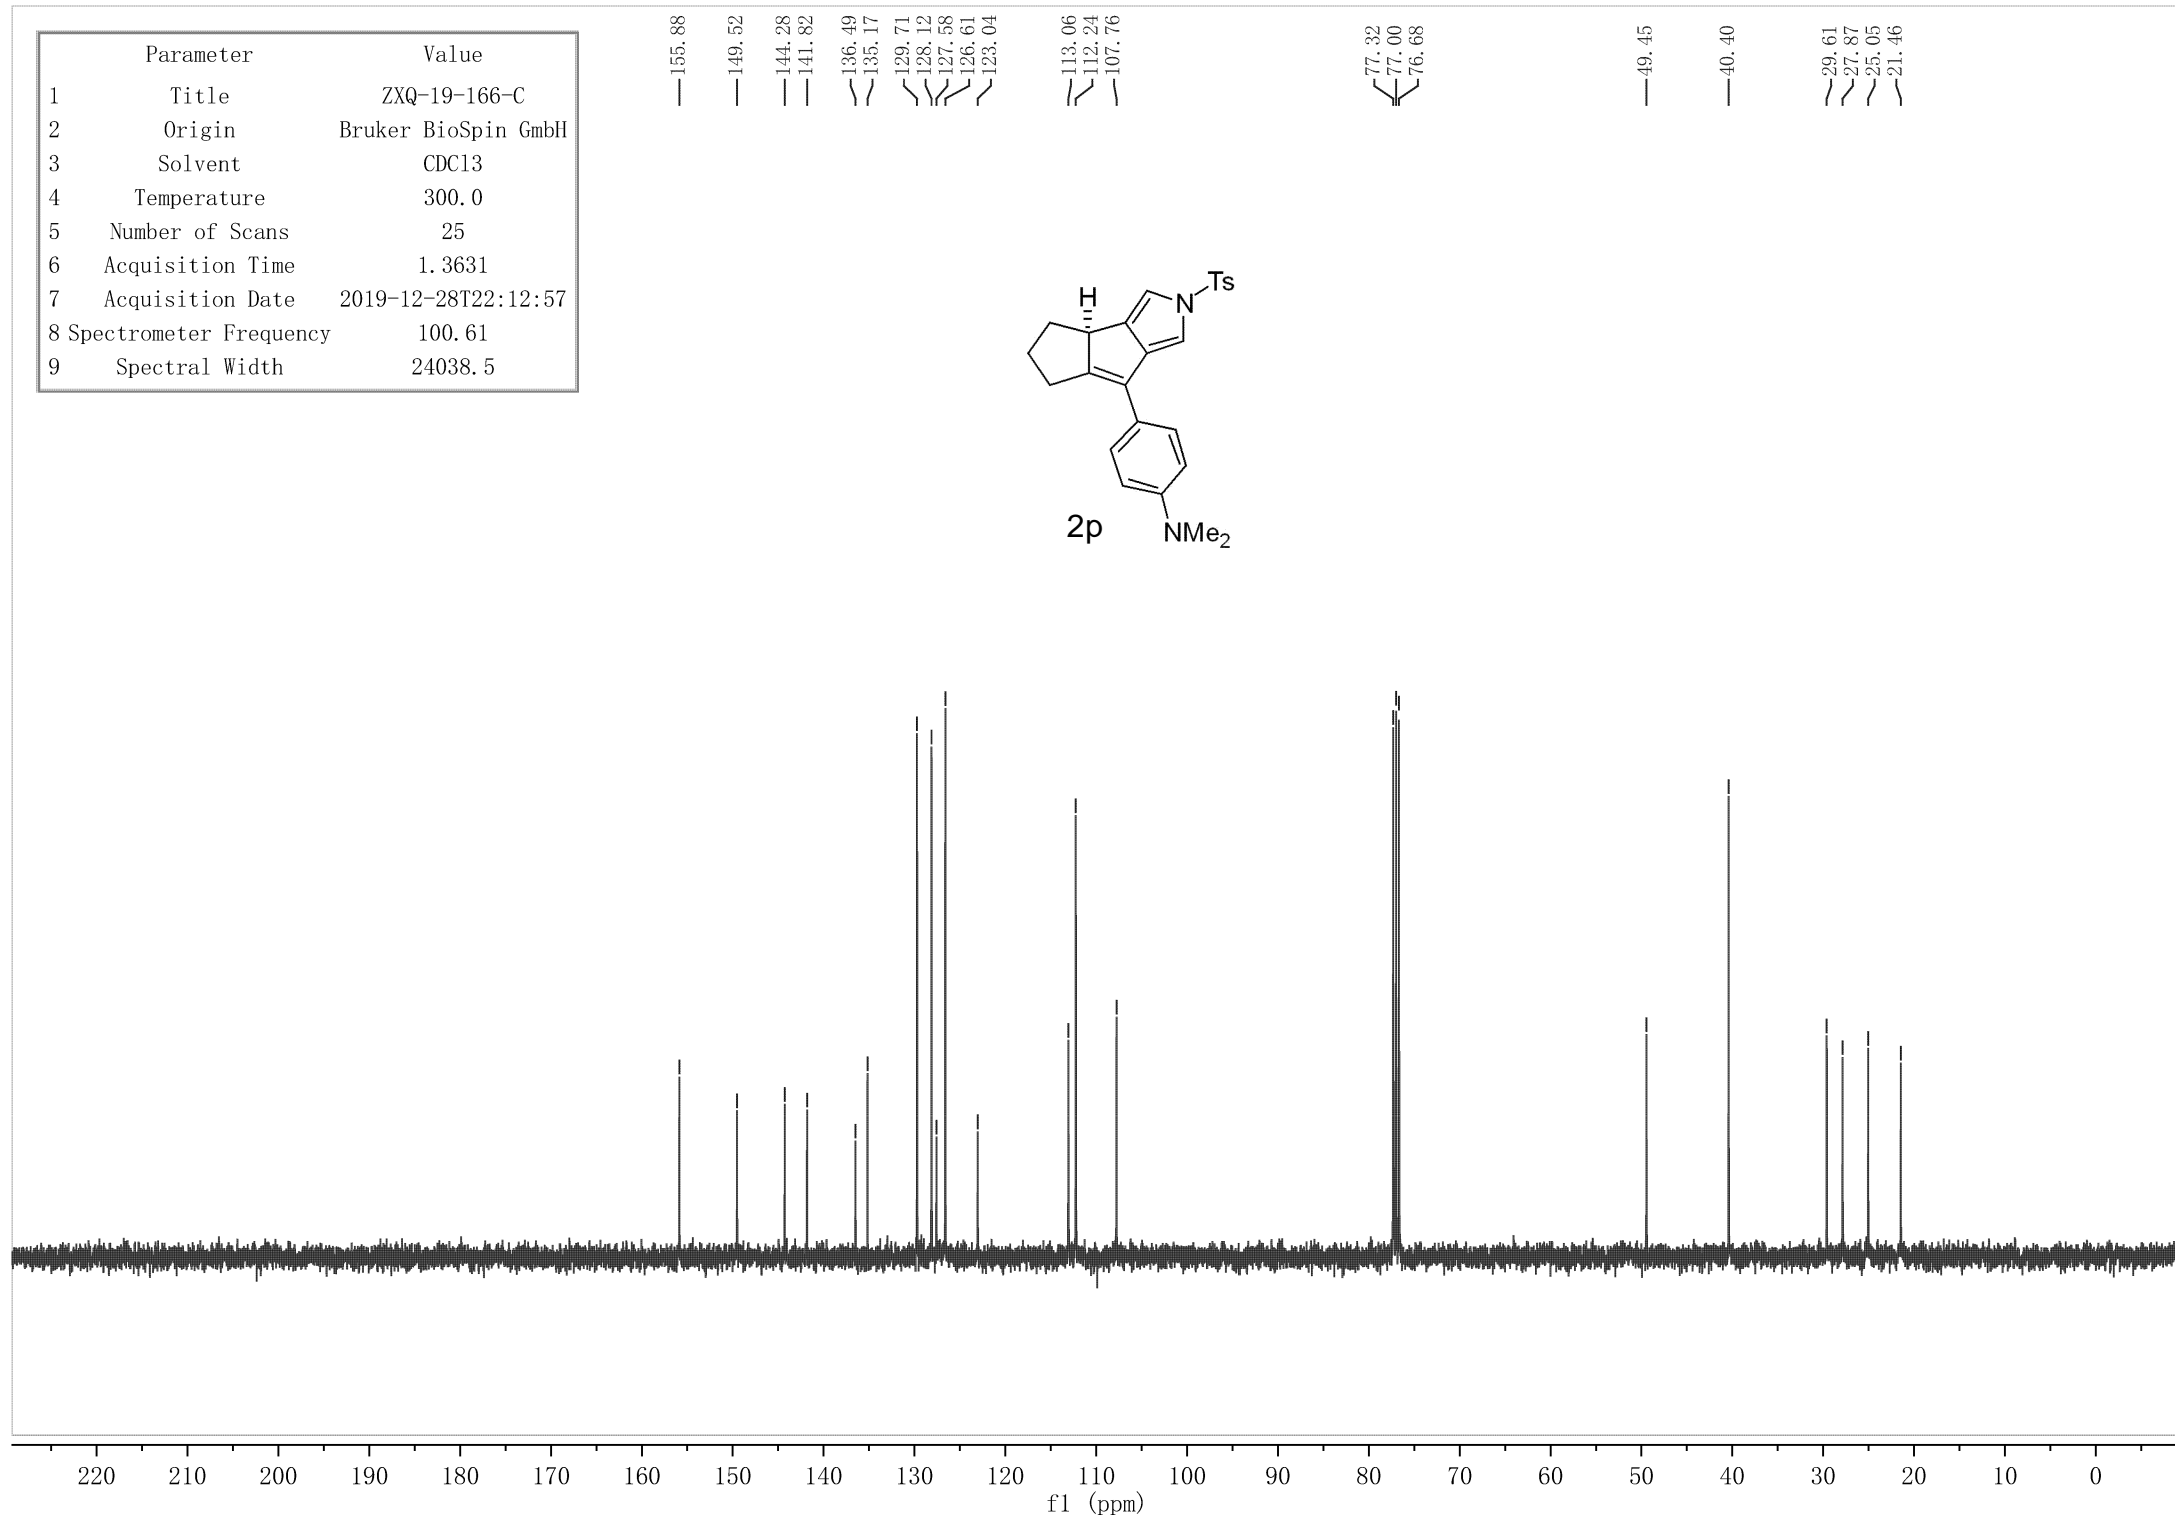



| Parameter                | Value               |
|--------------------------|---------------------|
| 1 Title                  | ZXQ-21-47           |
| 2 Origin                 | Bruker BioSpin GmbH |
| 3 Solvent                | CDCl3               |
| 4 Temperature            | 298.0               |
| 5 Number of Scans        | 11                  |
| 6 Acquisition Time       | 4.0894              |
| 7 Acquisition Date       | 2020-06-19T17:10:24 |
| 8 Spectrometer Frequency | 400.13              |
| 9 Spectral Width         | 8012.8              |

7.714  
7.693  
7.349  
7.334  
7.327  
7.316  
7.298  
7.255  
7.240  
7.236  
7.208  
7.191  
7.003  
7.000  
6.970  
6.929  
6.769  
6.747

4.671

3.532  
3.513  
3.503  
3.484  
2.650  
2.634  
2.624  
2.608  
2.592  
2.403  
2.381  
2.372  
2.359  
2.331  
2.143  
2.137  
2.130  
2.121  
2.100  
2.060  
2.050  
2.043  
2.033  
2.027  
2.019  
1.001  
0.975  
0.950  
0.921

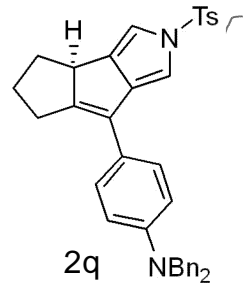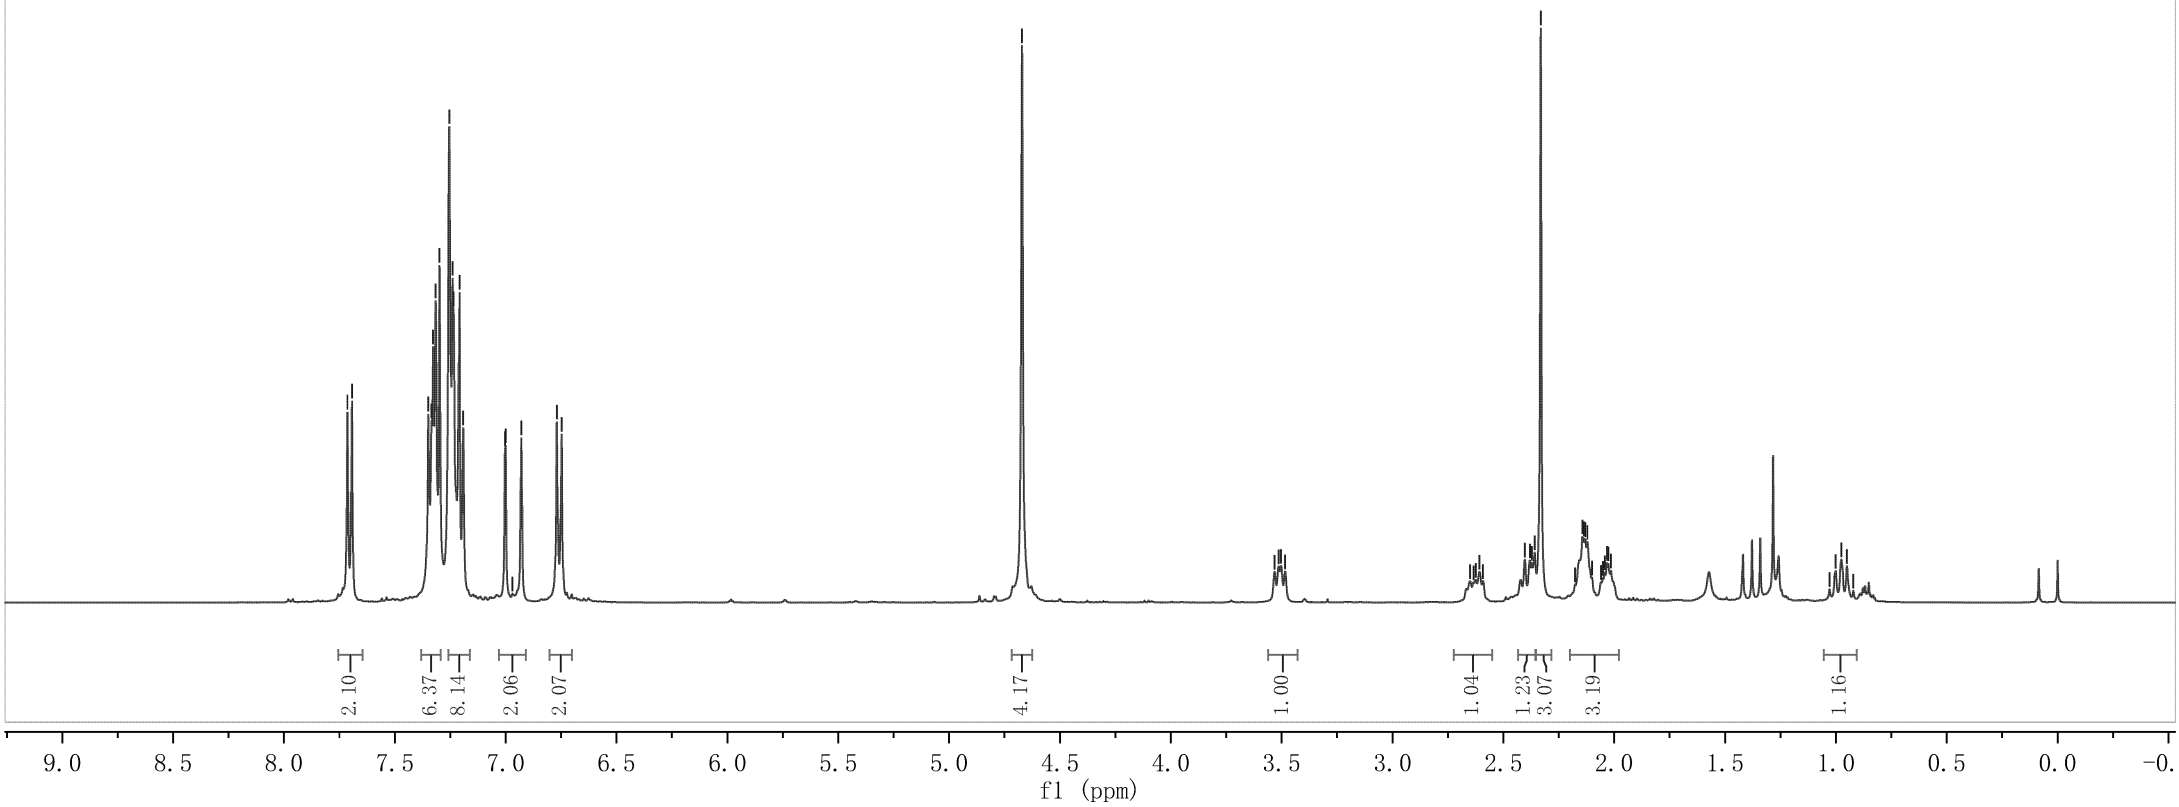

| Parameter                | Value               |
|--------------------------|---------------------|
| 1 Title                  | ZXQ-21-47-C         |
| 2 Origin                 | Bruker BioSpin GmbH |
| 3 Solvent                | CDC13               |
| 4 Temperature            | 300.0               |
| 5 Number of Scans        | 23                  |
| 6 Acquisition Time       | 1.3631              |
| 7 Acquisition Date       | 2020-06-19T17:11:36 |
| 8 Spectrometer Frequency | 100.61              |
| 9 Spectral Width         | 24038.5             |

155.93 148.08 144.24 141.74 138.34 136.51 135.12 129.71 128.64 128.26 127.45 126.92 126.61 126.56 123.36 113.06 112.28 107.81 77.32 77.00 76.68 54.26 49.46 29.60 27.90 25.08 21.48

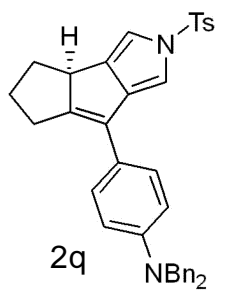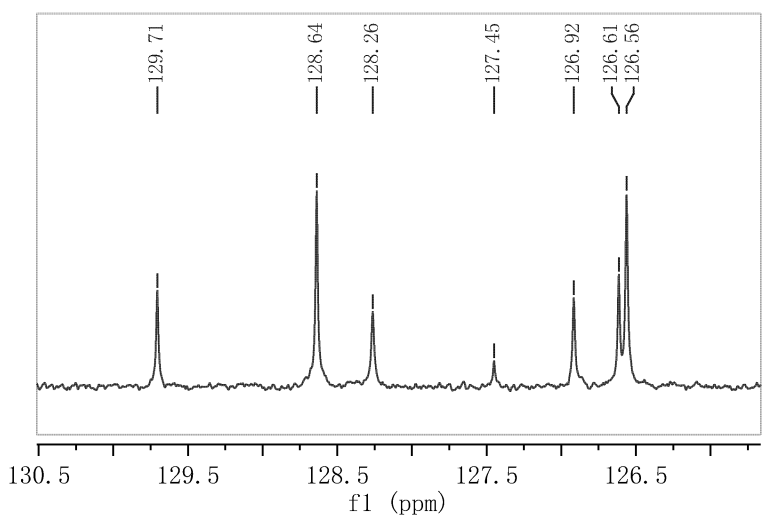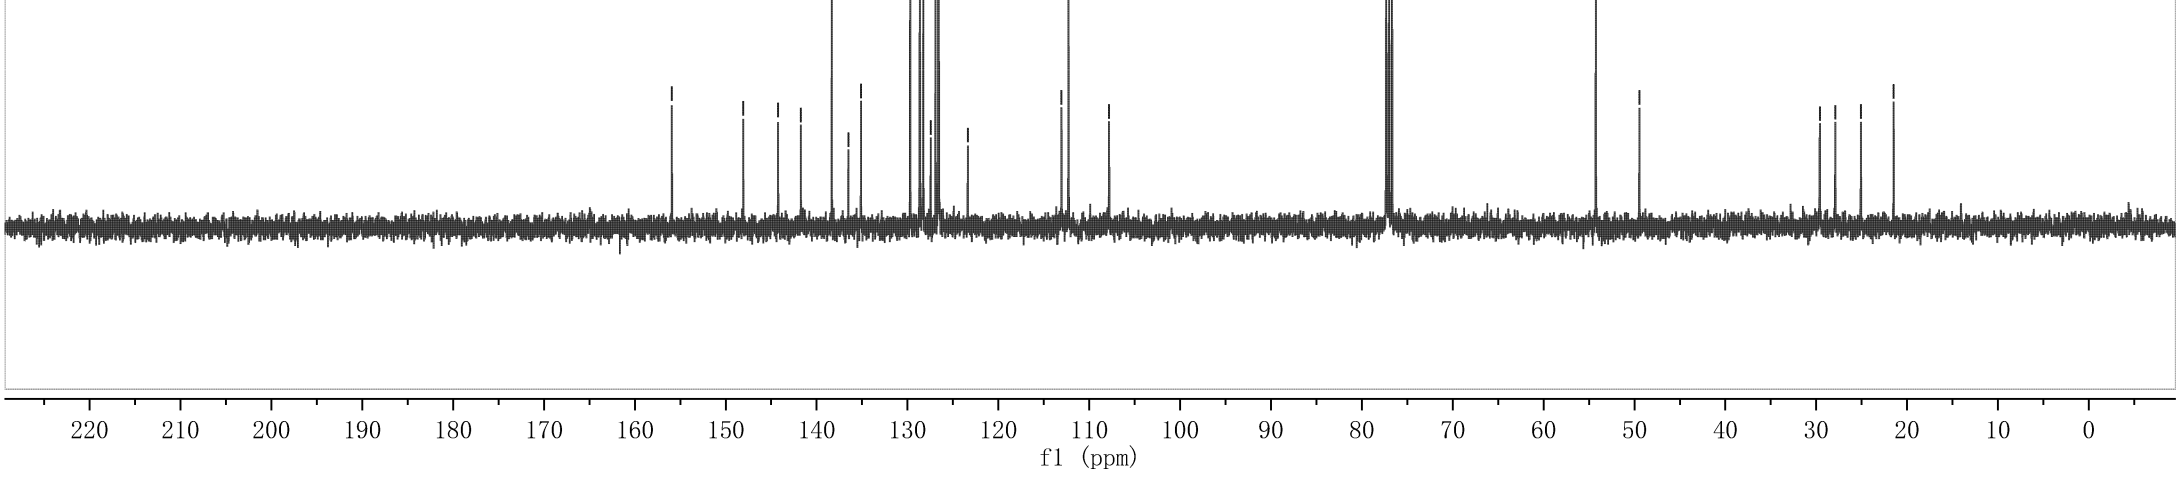

| Parameter                | Value               |
|--------------------------|---------------------|
| 1 Title                  | ZXQ-21-86           |
| 2 Origin                 | Bruker BioSpin GmbH |
| 3 Solvent                | CDCl3               |
| 4 Temperature            | 300.9               |
| 5 Number of Scans        | 9                   |
| 6 Acquisition Time       | 3.9846              |
| 7 Acquisition Date       | 2020-06-27T16:43:29 |
| 8 Spectrometer Frequency | 400.03              |
| 9 Spectral Width         | 8223.7              |

7.717  
7.696  
7.350  
7.328  
7.216  
7.195  
7.160  
7.139  
7.011  
7.009  
6.931  
6.860  
6.838  
6.782  
6.760

4.575

3.768  
3.533  
3.515  
3.504  
3.486

2.671  
2.656  
2.639  
2.628  
2.613  
2.597  
2.425  
2.407  
2.386  
2.375  
2.364  
2.333  
2.178  
2.145  
2.139  
2.132  
2.123  
2.052  
2.044  
2.034  
2.027  
2.016  
1.003  
0.978  
0.951  
0.924

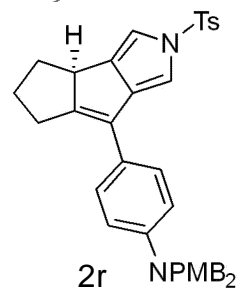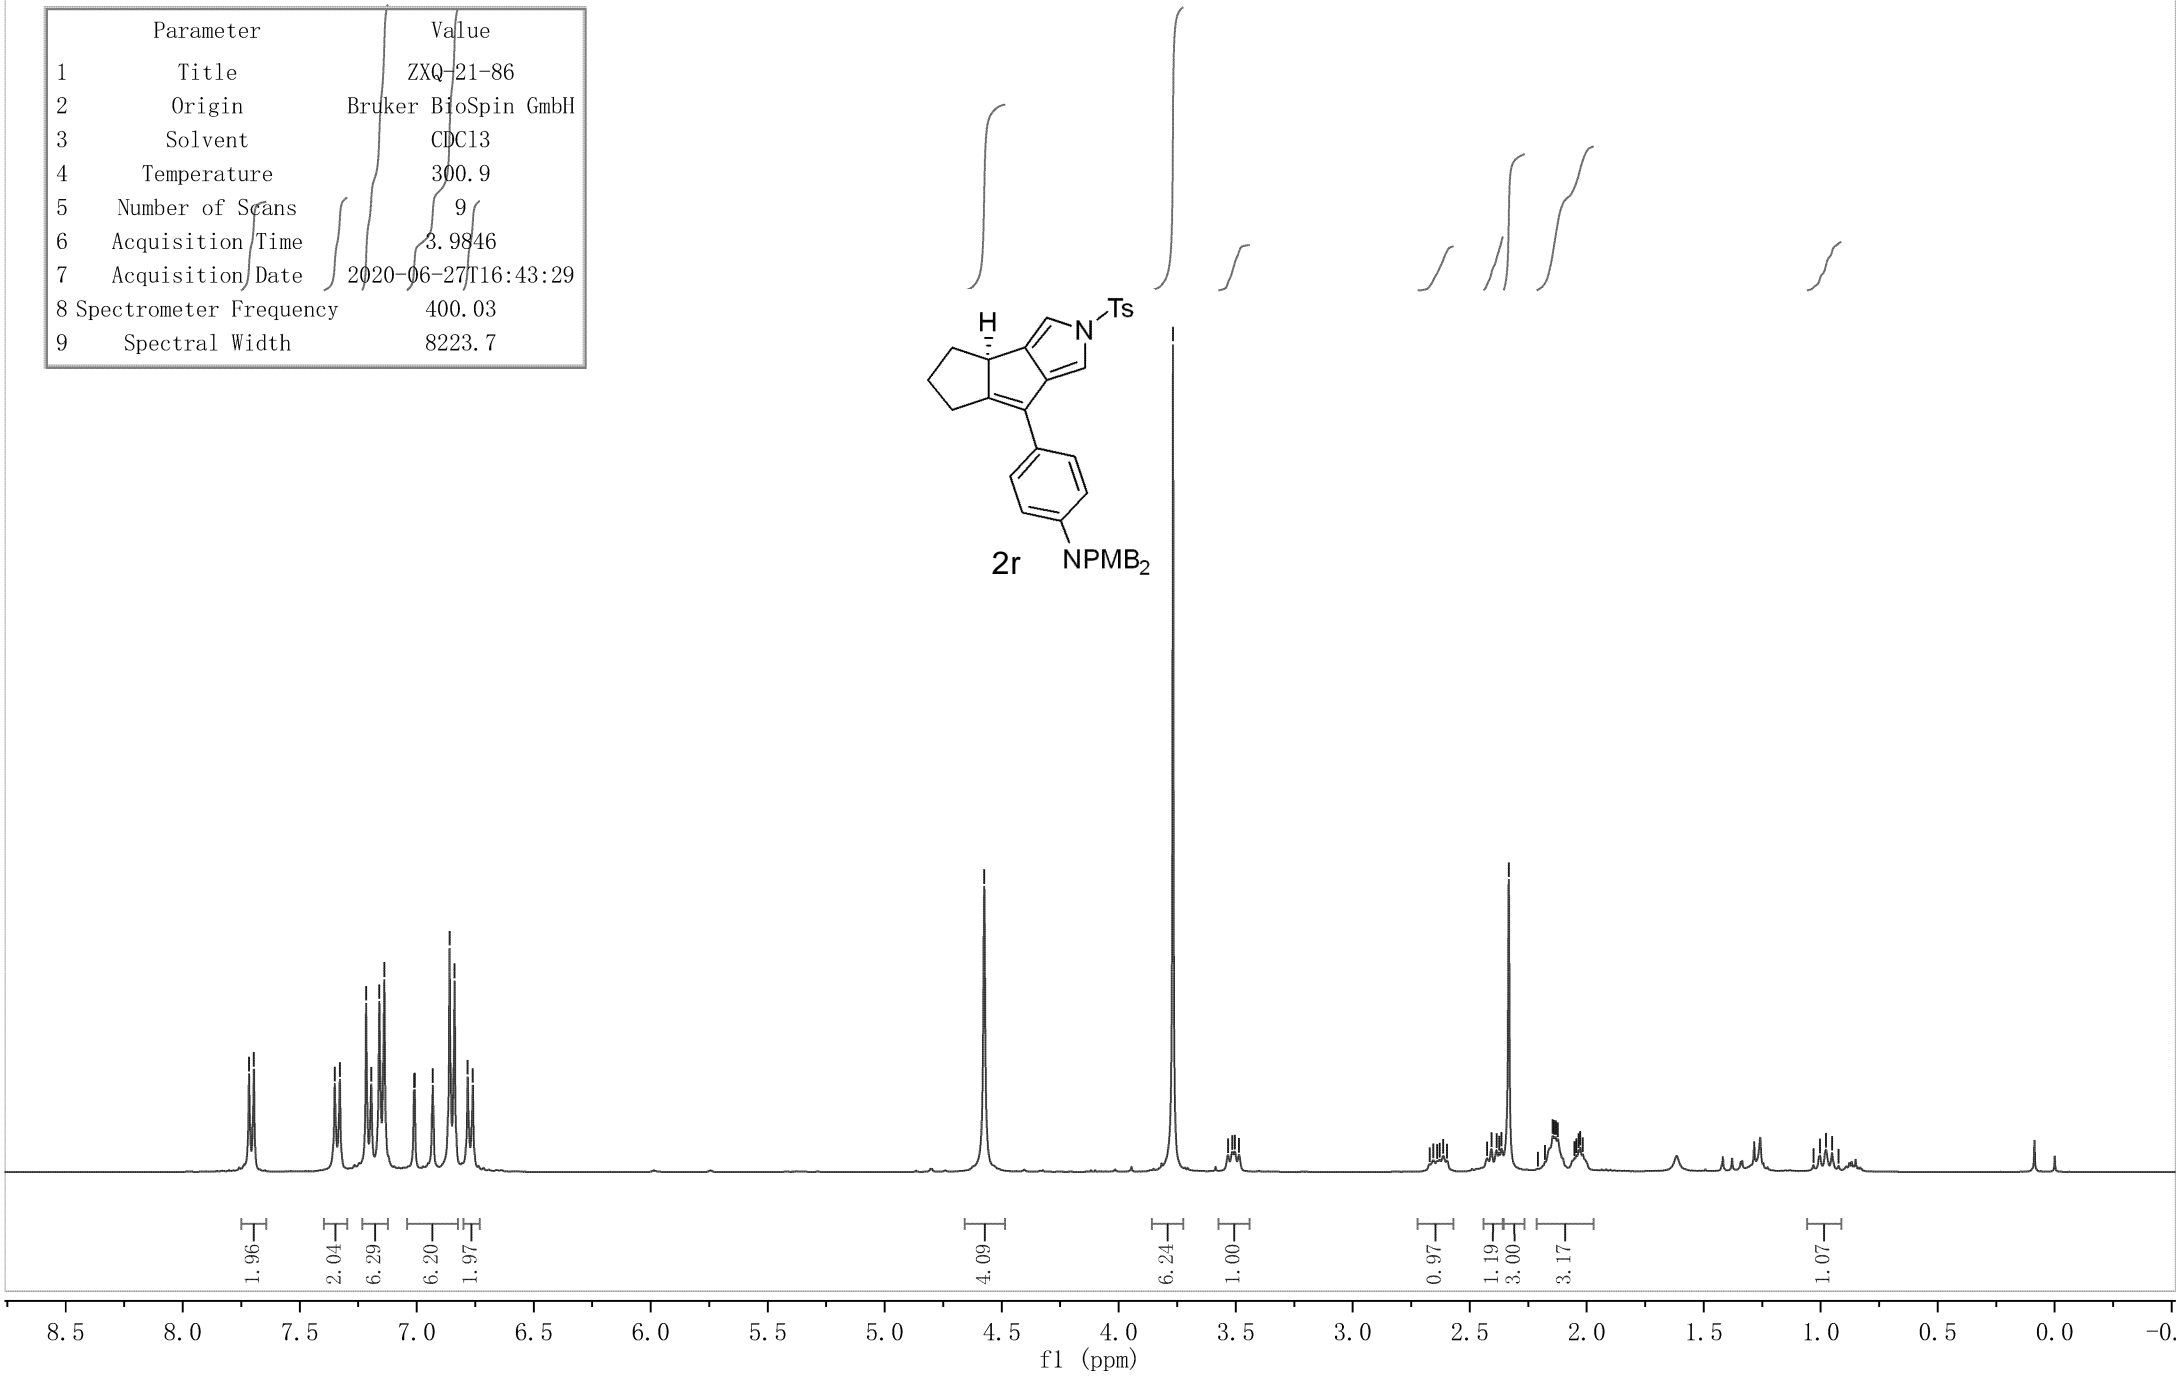

| Parameter                | Value               |
|--------------------------|---------------------|
| 1 Title                  | ZXQ-21-86-C         |
| 2 Origin                 | Bruker BioSpin GmbH |
| 3 Solvent                | CDC13               |
| 4 Temperature            | 301.0               |
| 5 Number of Scans        | 54                  |
| 6 Acquisition Time       | 1.3631              |
| 7 Acquisition Date       | 2020-06-27T16:44:59 |
| 8 Spectrometer Frequency | 100.59              |
| 9 Spectral Width         | 24038.5             |

158.61 155.83 148.19 144.24 141.76 136.52 135.14 130.26 129.70 128.23 127.80 127.47 126.60 123.24 114.04 113.05 112.43 107.82 77.32 77.00 76.68 55.21 53.52 49.45 29.60 27.90 25.09 21.46

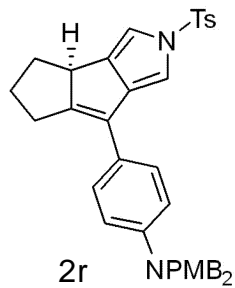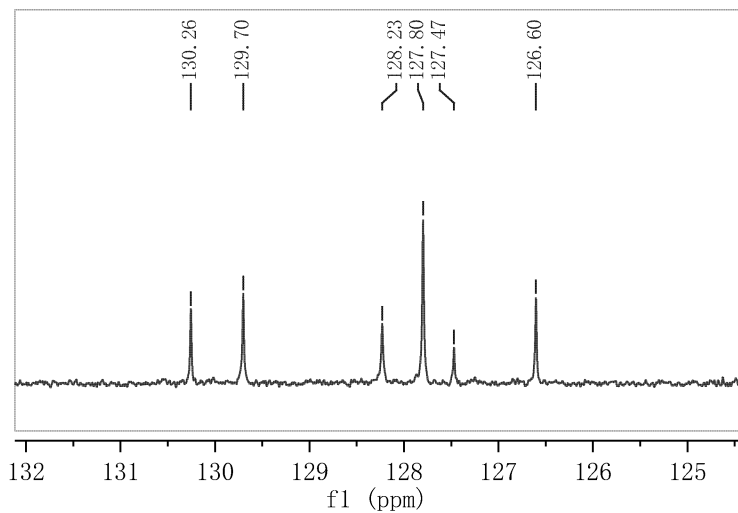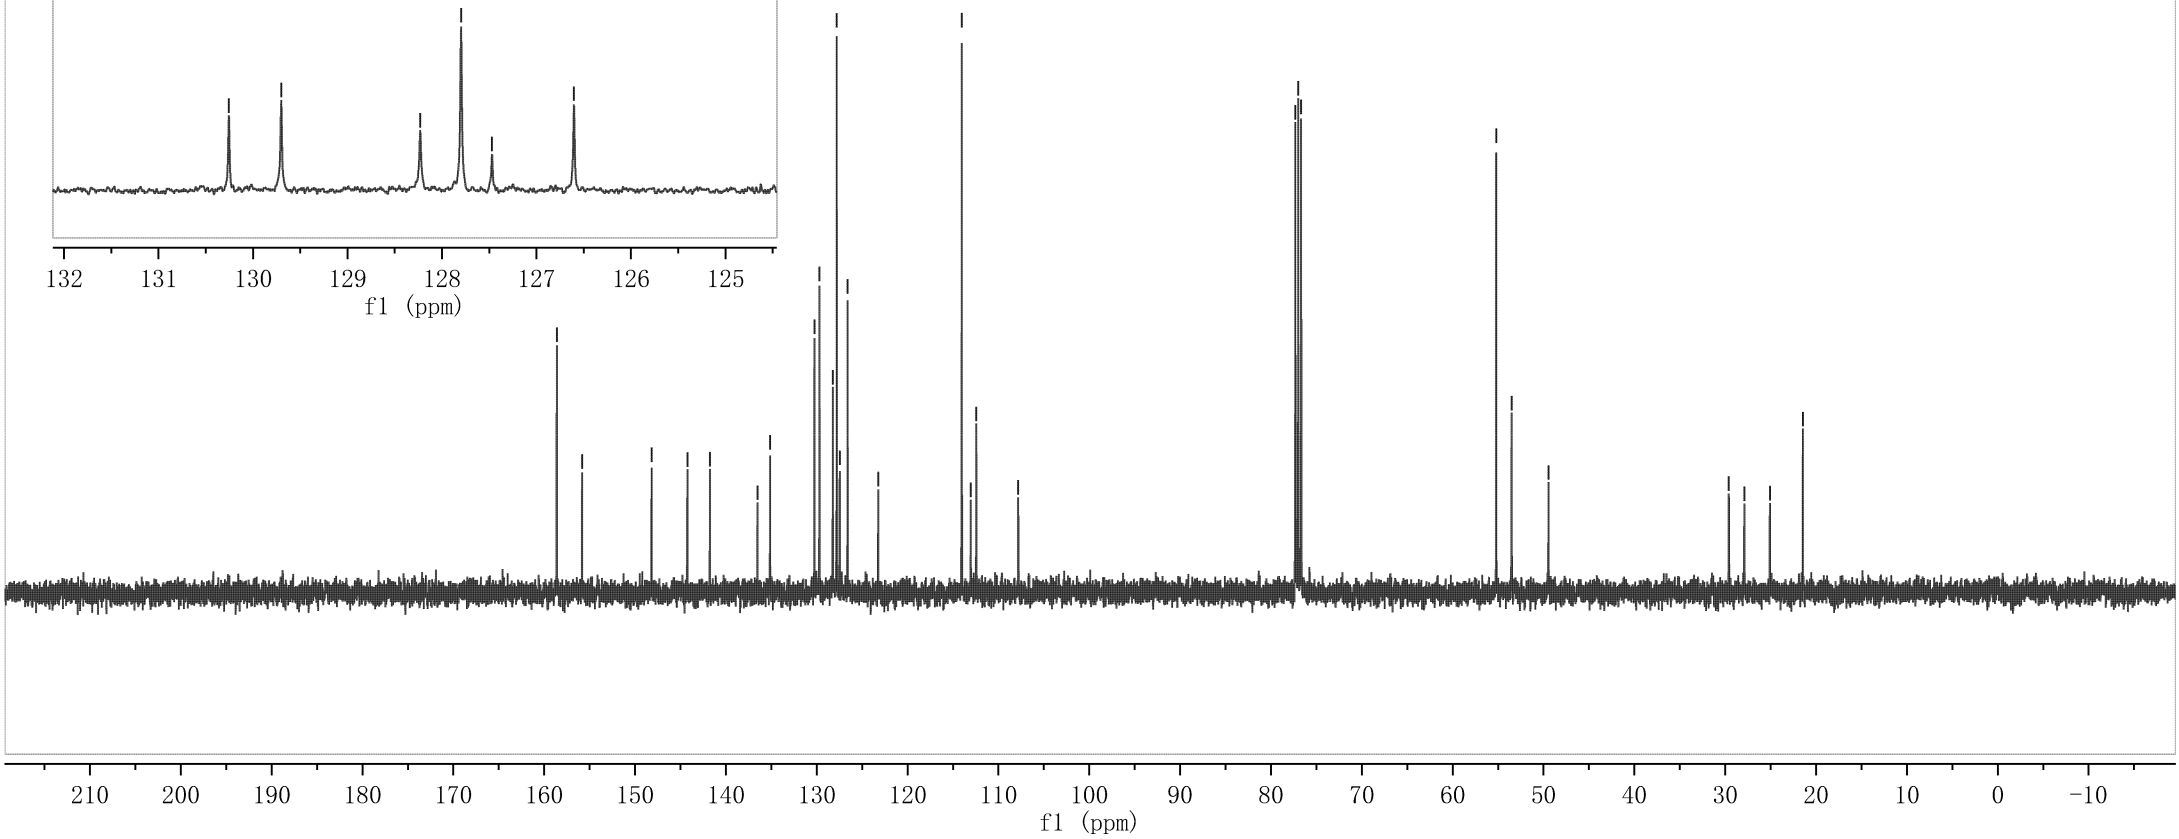

7.760  
7.739  
7.444  
7.423  
7.296  
7.275  
7.264  
7.255  
7.245  
7.097  
7.050  
6.978

3.606  
3.606  
3.587  
3.577  
3.558

2.742  
2.725  
2.715  
2.504  
2.450  
2.430  
2.410  
2.371  
2.247  
2.204  
2.188  
2.123  
2.106  
2.095  
2.078  
2.041  
1.104  
1.076  
1.051  
1.025  
0.997

| Parameter                | Value               |
|--------------------------|---------------------|
| 1 Title                  | ZXQ-19-40-2         |
| 2 Origin                 | Bruker BioSpin GmbH |
| 3 Solvent                | CDC13               |
| 4 Temperature            | 298.0               |
| 5 Number of Scans        | 10                  |
| 6 Acquisition Time       | 4.0894              |
| 7 Acquisition Date       | 2019-11-28T16:17:28 |
| 8 Spectrometer Frequency | 400.13              |
| 9 Spectral Width         | 8012.8              |

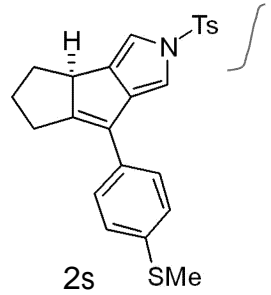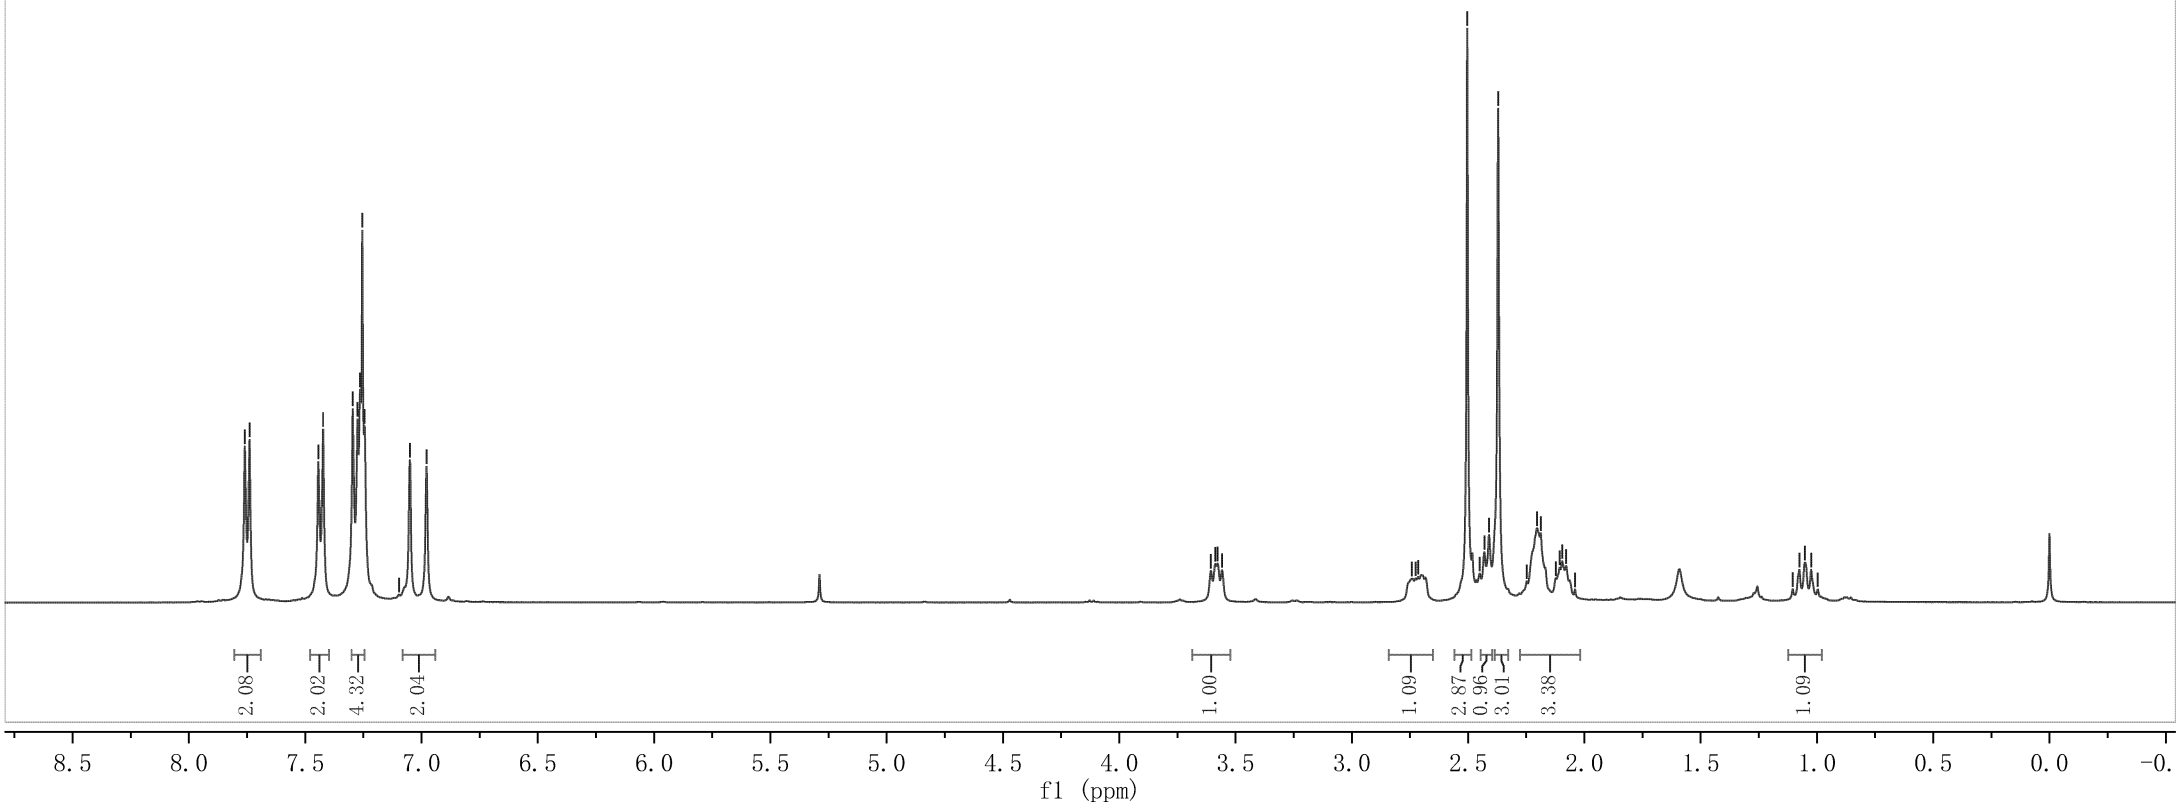

| Parameter                | Value               |
|--------------------------|---------------------|
| 1 Title                  | ZXQ-19-40-2-C       |
| 2 Origin                 | Bruker BioSpin GmbH |
| 3 Solvent                | CDC13               |
| 4 Temperature            | 300.0               |
| 5 Number of Scans        | 109                 |
| 6 Acquisition Time       | 1.3631              |
| 7 Acquisition Date       | 2019-11-28T16:19:11 |
| 8 Spectrometer Frequency | 100.61              |
| 9 Spectral Width         | 24038.5             |

159.47  
 144.45  
 141.13  
 137.24  
 136.48  
 134.76  
 131.60  
 129.81  
 127.62  
 127.41  
 126.70  
 126.59  
 113.30  
 107.83  
 77.32  
 77.00  
 76.68  
 49.83  
 29.57  
 27.79  
 25.11  
 21.53  
 15.85

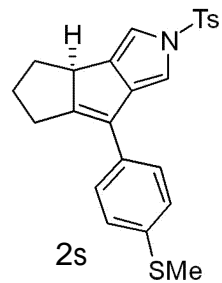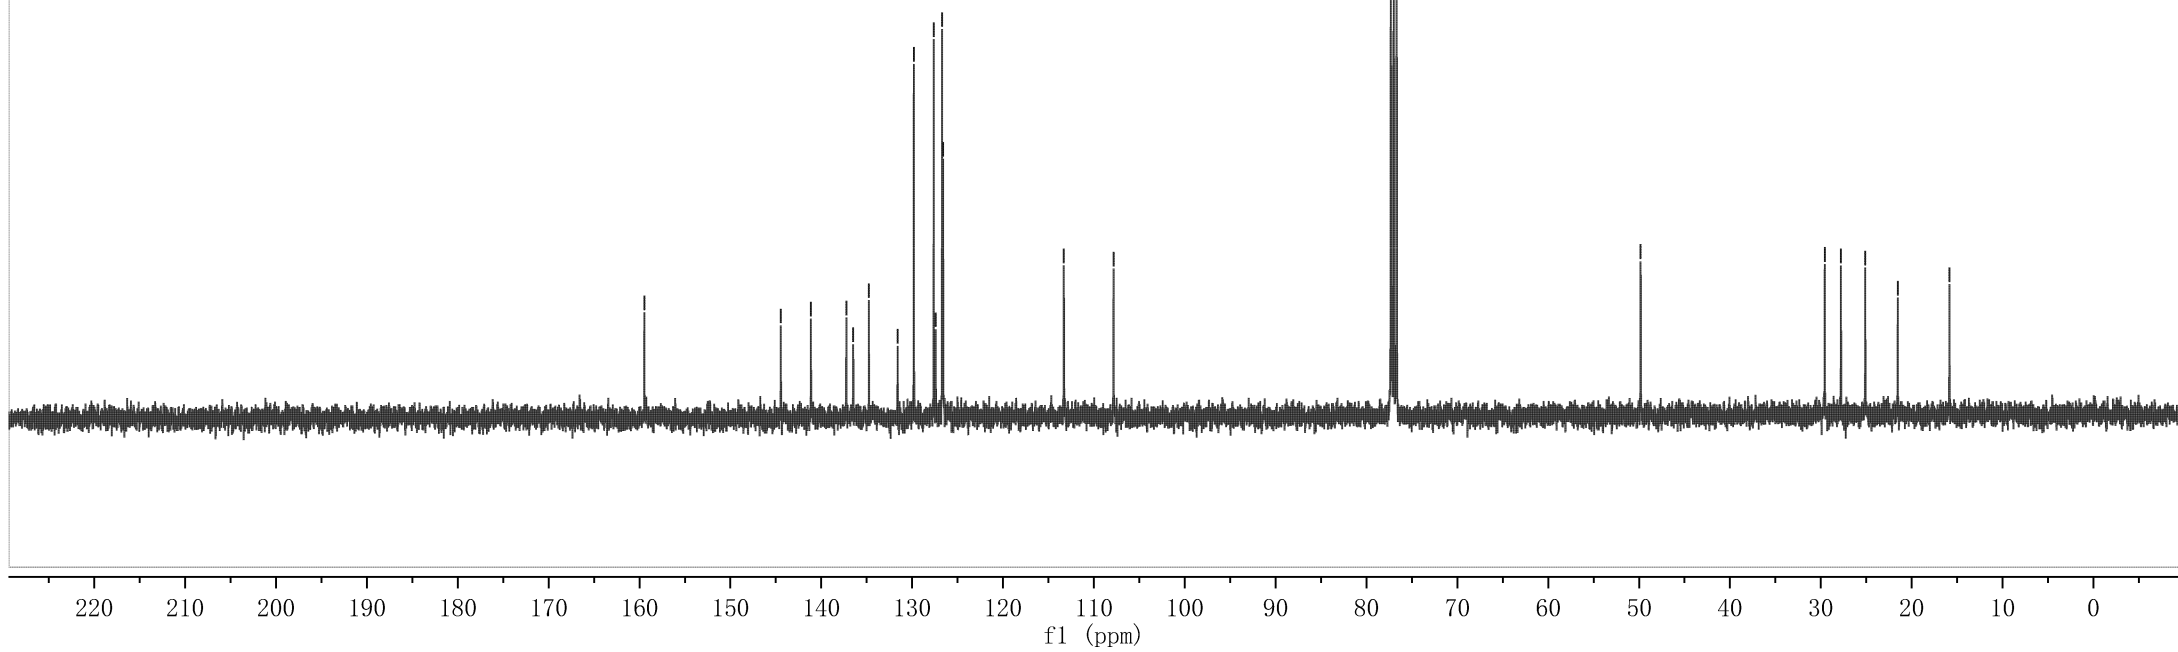

7.752  
7.731  
7.415  
7.395  
7.244  
7.234  
7.224  
7.212  
7.192  
7.064  
7.061  
7.049  
6.973  
6.970  
6.966

3.589  
3.570  
3.560  
3.541  
3.541  
2.747  
2.737  
2.725  
2.715  
2.704  
2.692  
2.682  
2.671  
2.428  
2.406  
2.364  
2.350  
2.203  
2.190  
2.184  
2.180  
2.174  
2.166  
2.068  
2.068  
1.062  
1.041  
1.033  
1.011  
1.011  
1.005  
1.005  
0.983

| Parameter                | Value               |
|--------------------------|---------------------|
| 1 Title                  | ZXQ-18-229          |
| 2 Origin                 | Bruker BioSpin GmbH |
| 3 Solvent                | CDC13               |
| 4 Temperature            | 298.0               |
| 5 Number of Scans        | 13                  |
| 6 Acquisition Time       | 4.0894              |
| 7 Acquisition Date       | 2019-11-07T16:40:22 |
| 8 Spectrometer Frequency | 400.13              |
| 9 Spectral Width         | 8012.8              |

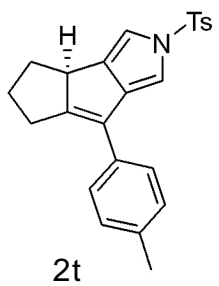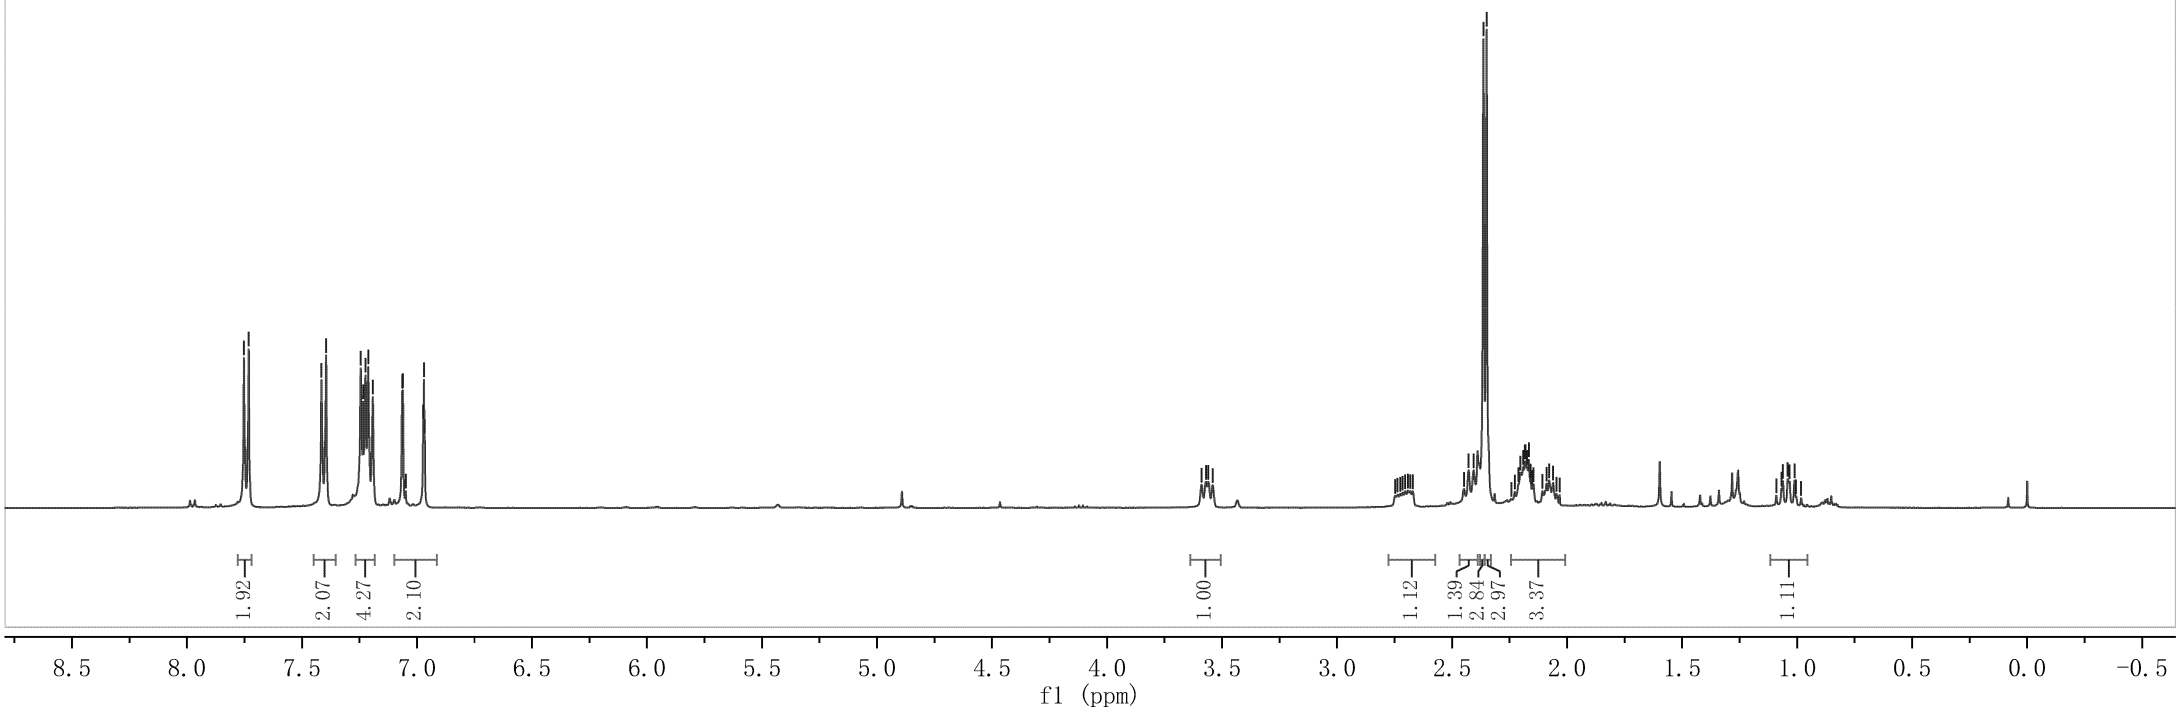

| Parameter                | Value               |
|--------------------------|---------------------|
| 1 Title                  | ZXQ-18-229-C-1      |
| 2 Origin                 | Bruker BioSpin GmbH |
| 3 Solvent                | CDC13               |
| 4 Temperature            | 300.0               |
| 5 Number of Scans        | 12                  |
| 6 Acquisition Time       | 1.3631              |
| 7 Acquisition Date       | 2019-11-07T16:43:39 |
| 8 Spectrometer Frequency | 100.61              |
| 9 Spectral Width         | 24038.5             |

158.91  
 144.38  
 141.41  
 136.85  
 136.48  
 134.88  
 131.81  
 129.77  
 129.12  
 127.75  
 127.13  
 126.66

113.22  
 107.86

77.32  
 77.00  
 76.68

49.69

29.53  
 27.77  
 25.02  
 21.49  
 21.19

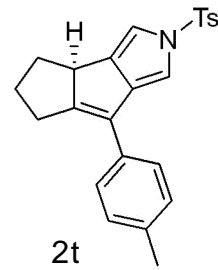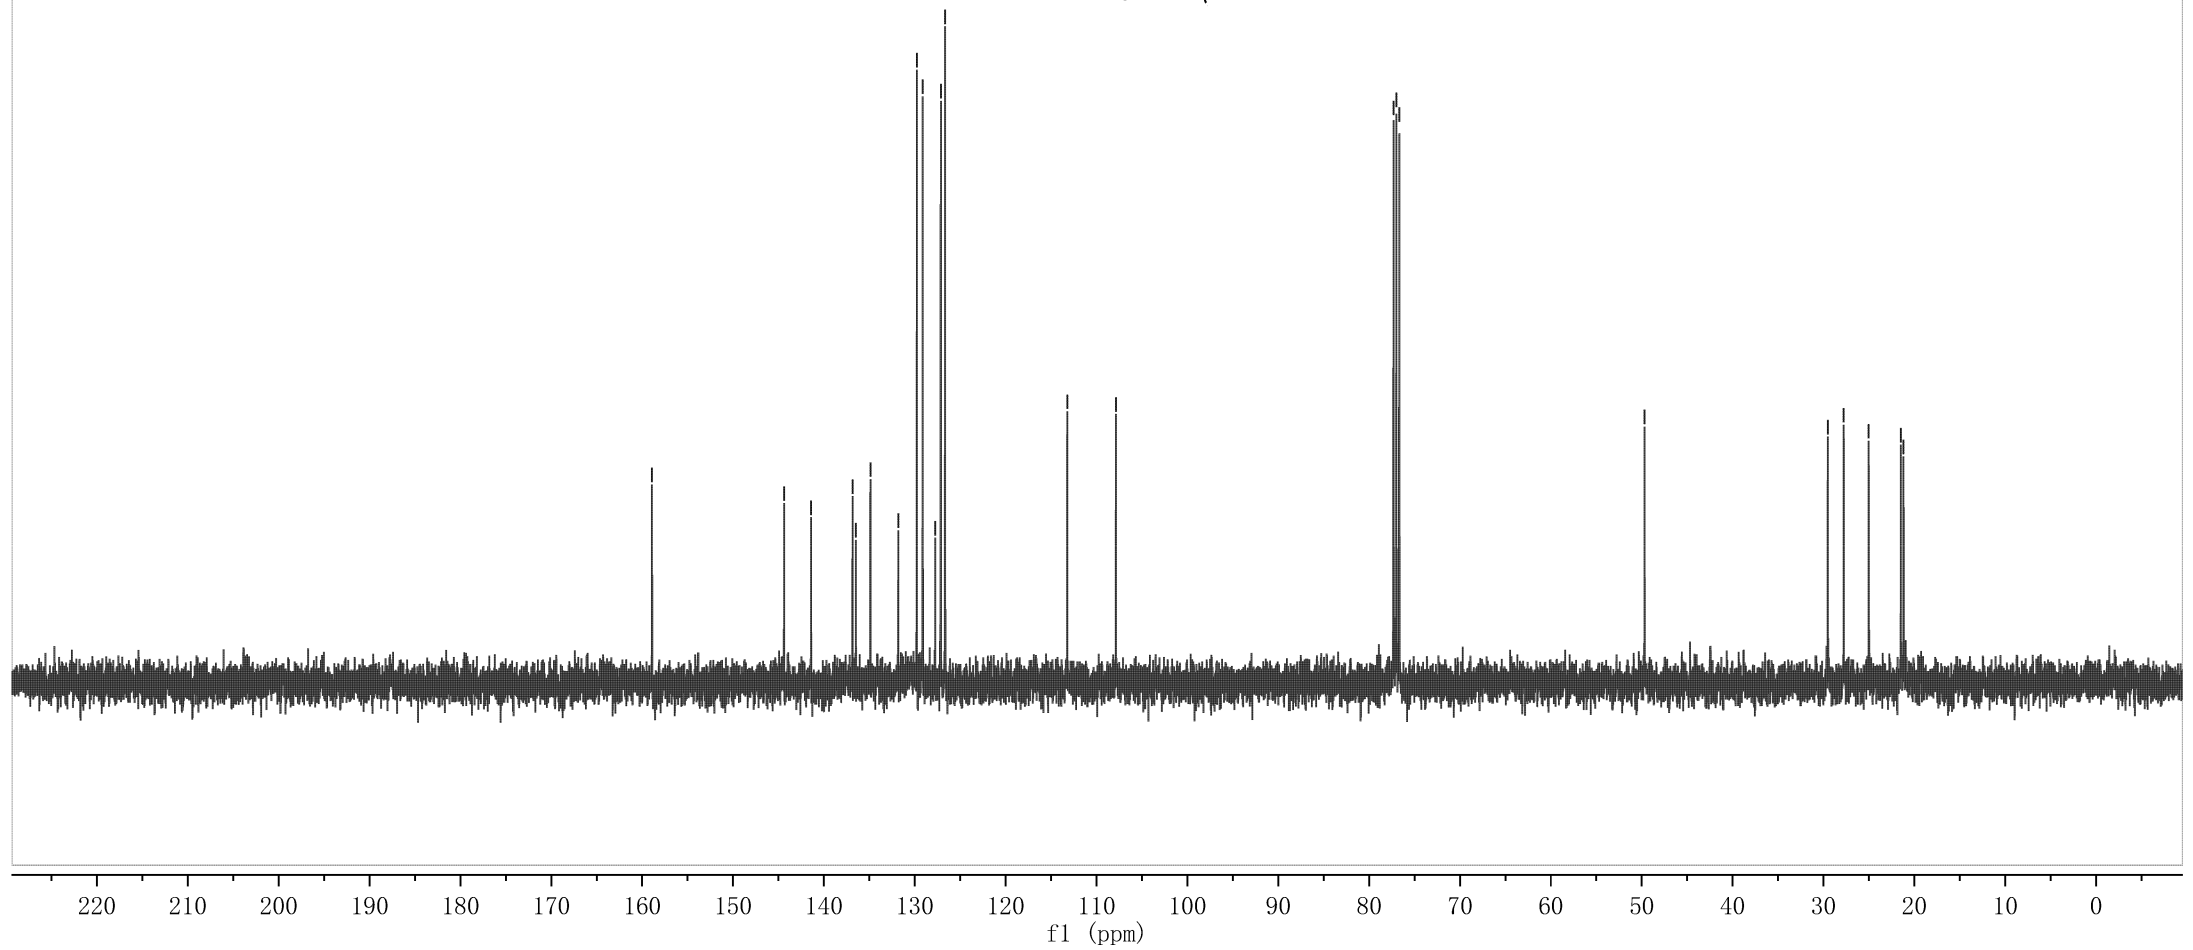



7.678  
7.657  
7.438  
7.419  
7.333  
7.314  
7.295  
7.211  
7.193  
7.170  
7.155  
7.149  
6.998  
6.900

3.525  
3.506  
3.496  
3.477  
2.654  
2.642  
2.633  
2.620  
2.611  
2.382  
2.362  
2.340  
2.313  
2.298  
2.271  
2.140  
2.130  
2.116  
2.107  
2.101  
2.096  
2.076  
2.038  
2.020  
2.008  
1.982  
1.018  
0.996  
0.989  
0.968  
0.960  
0.939  
0.910

| Parameter                | Value               |
|--------------------------|---------------------|
| 1 Title                  | ZXQ-21-138          |
| 2 Origin                 | Bruker BioSpin GmbH |
| 3 Solvent                | CDC13               |
| 4 Temperature            | 296.6               |
| 5 Number of Scans        | 6                   |
| 6 Acquisition Time       | 3.9846              |
| 7 Acquisition Date       | 2020-07-11T21:41:10 |
| 8 Spectrometer Frequency | 400.03              |
| 9 Spectral Width         | 8223.7              |

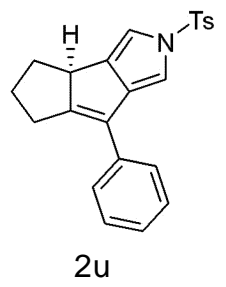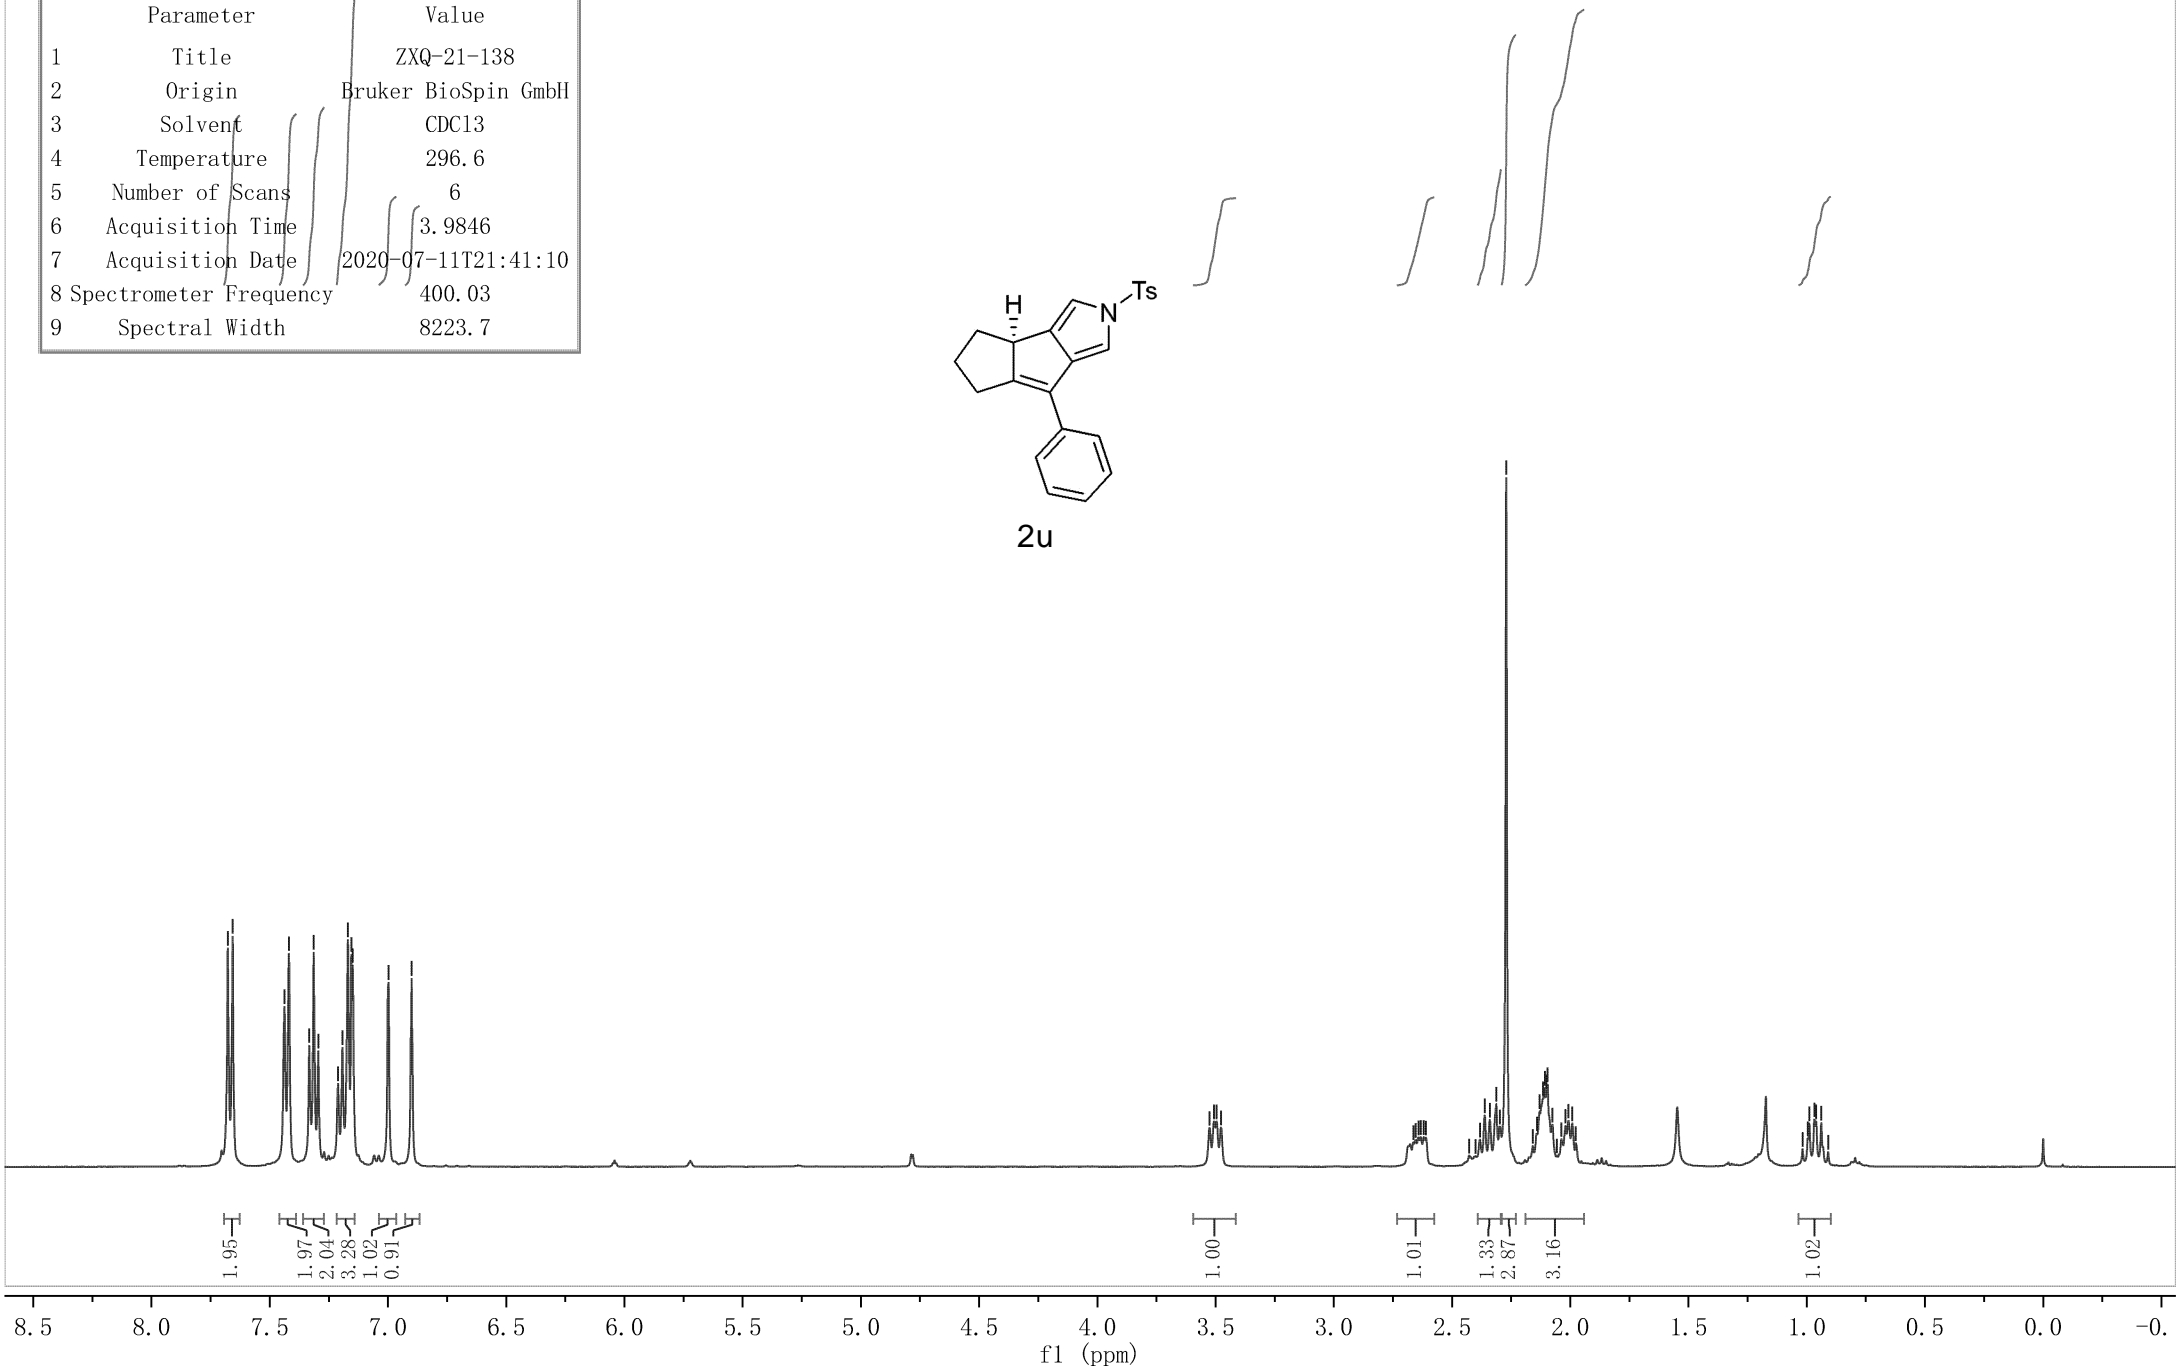

| Parameter                | Value               |
|--------------------------|---------------------|
| 1 Title                  | ZXQ-21-138-C        |
| 2 Origin                 | Bruker BioSpin GmbH |
| 3 Solvent                | CDC13               |
| 4 Temperature            | 296.7               |
| 5 Number of Scans        | 24                  |
| 6 Acquisition Time       | 1.3631              |
| 7 Acquisition Date       | 2020-07-11T21:43:53 |
| 8 Spectrometer Frequency | 100.59              |
| 9 Spectral Width         | 24038.5             |

159.89  
 144.43  
 141.22  
 136.40  
 134.79  
 134.62  
 129.78  
 128.42  
 127.88  
 127.21  
 127.06  
 126.66  
 113.25  
 107.87  
 77.32  
 77.00  
 76.68  
 49.77  
 29.50  
 27.75  
 25.03  
 21.50

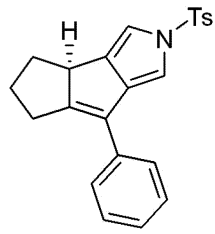

2u

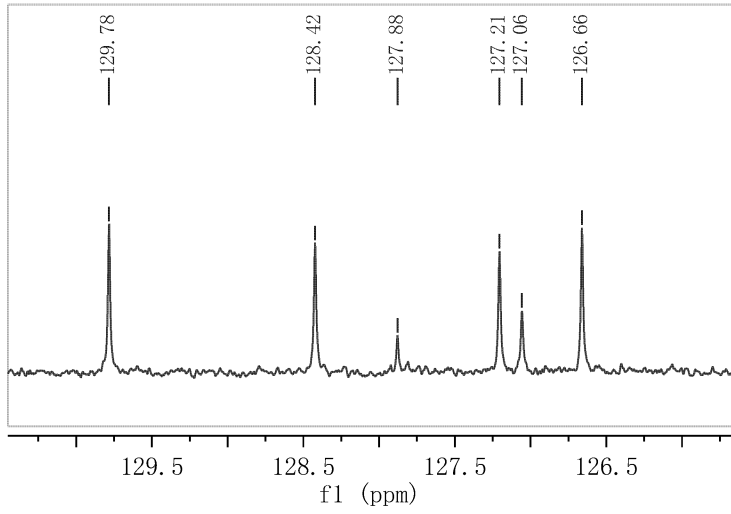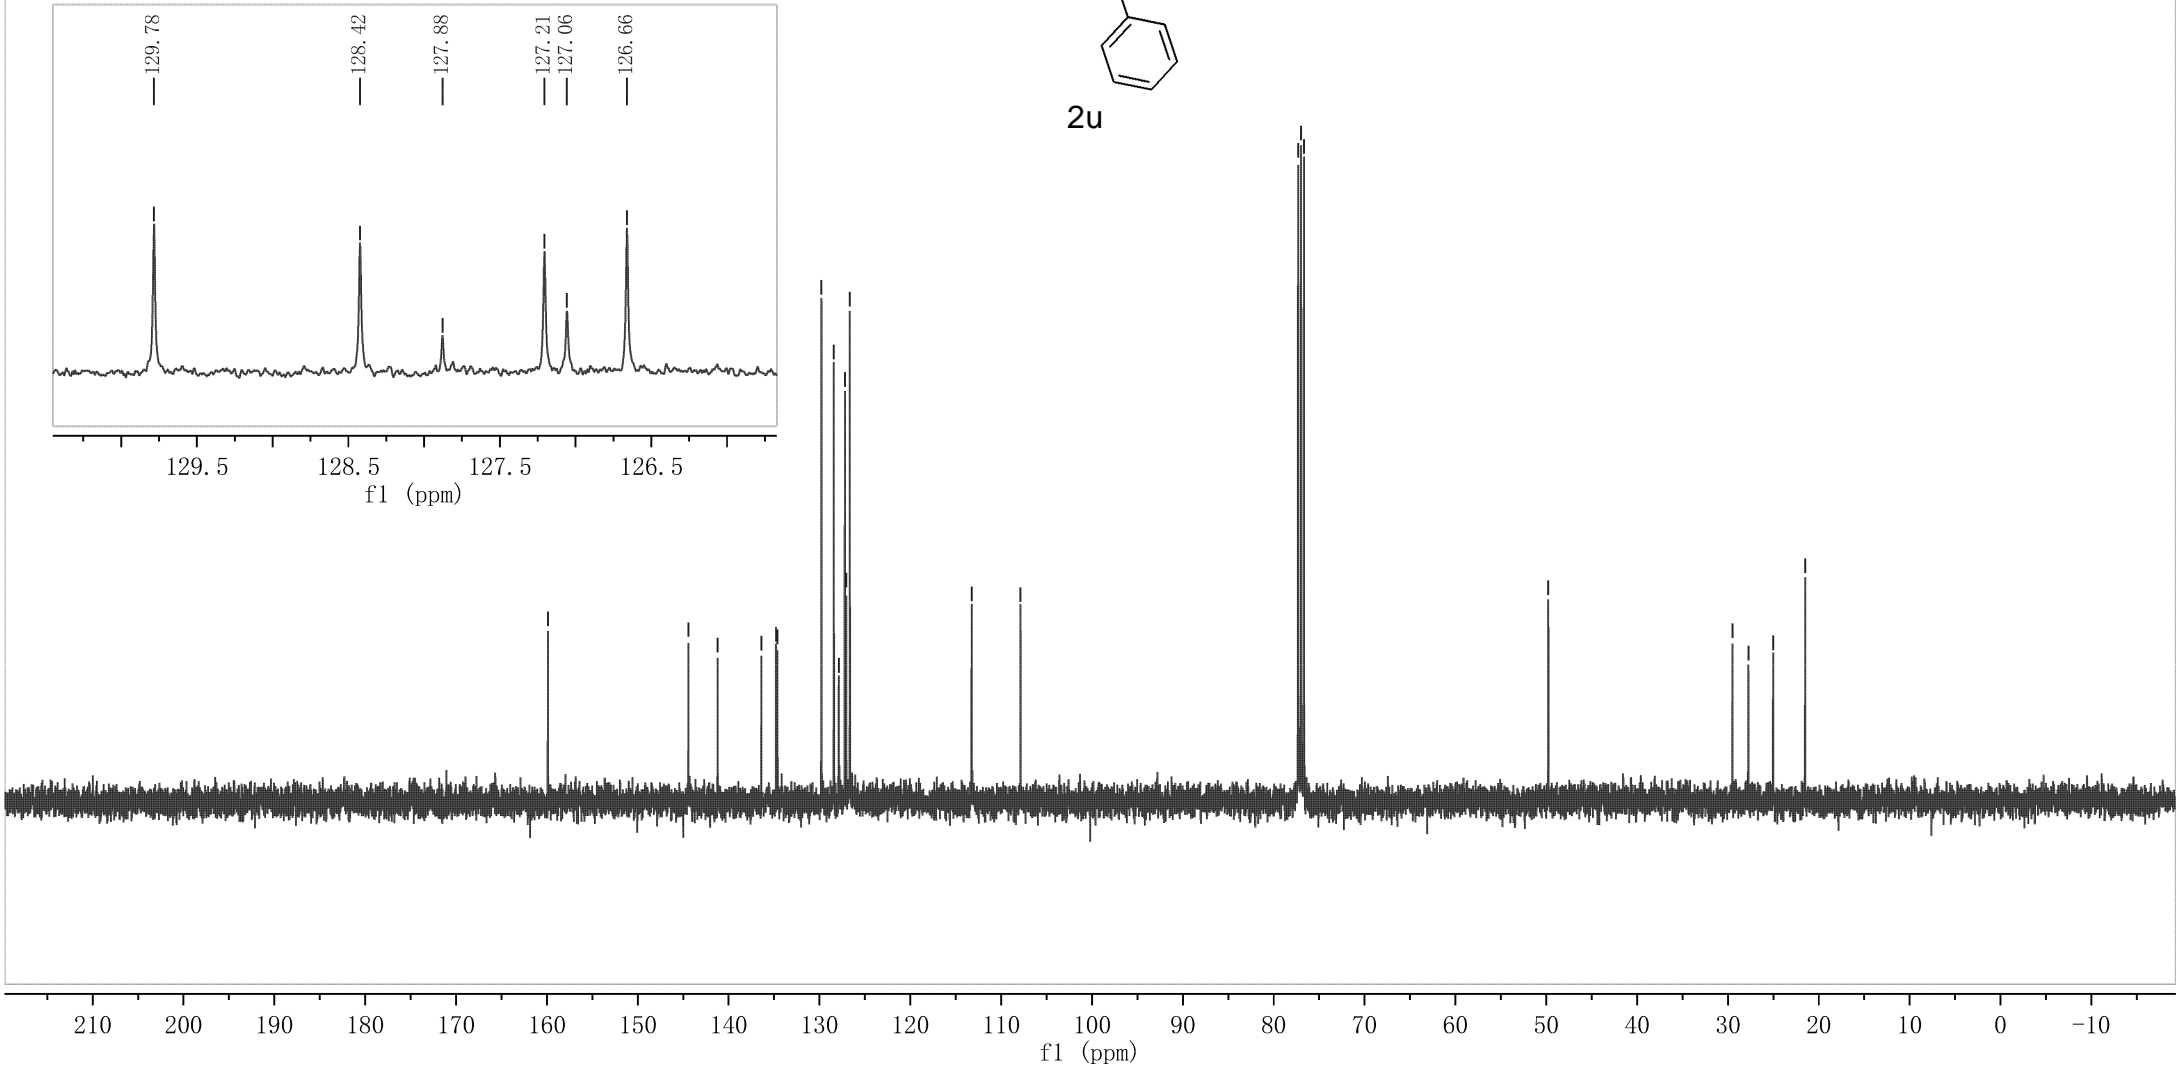

| Parameter                | Value               |
|--------------------------|---------------------|
| 1 Title                  | ZXQ-19-12           |
| 2 Origin                 | Bruker BioSpin GmbH |
| 3 Solvent                | CDC13               |
| 4 Temperature            | 298.0               |
| 5 Number of Scans        | 8                   |
| 6 Acquisition Time       | 4.0894              |
| 7 Acquisition Date       | 2019-11-23T16:11:32 |
| 8 Spectrometer Frequency | 400.13              |
| 9 Spectral Width         | 8012.8              |

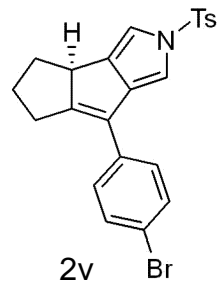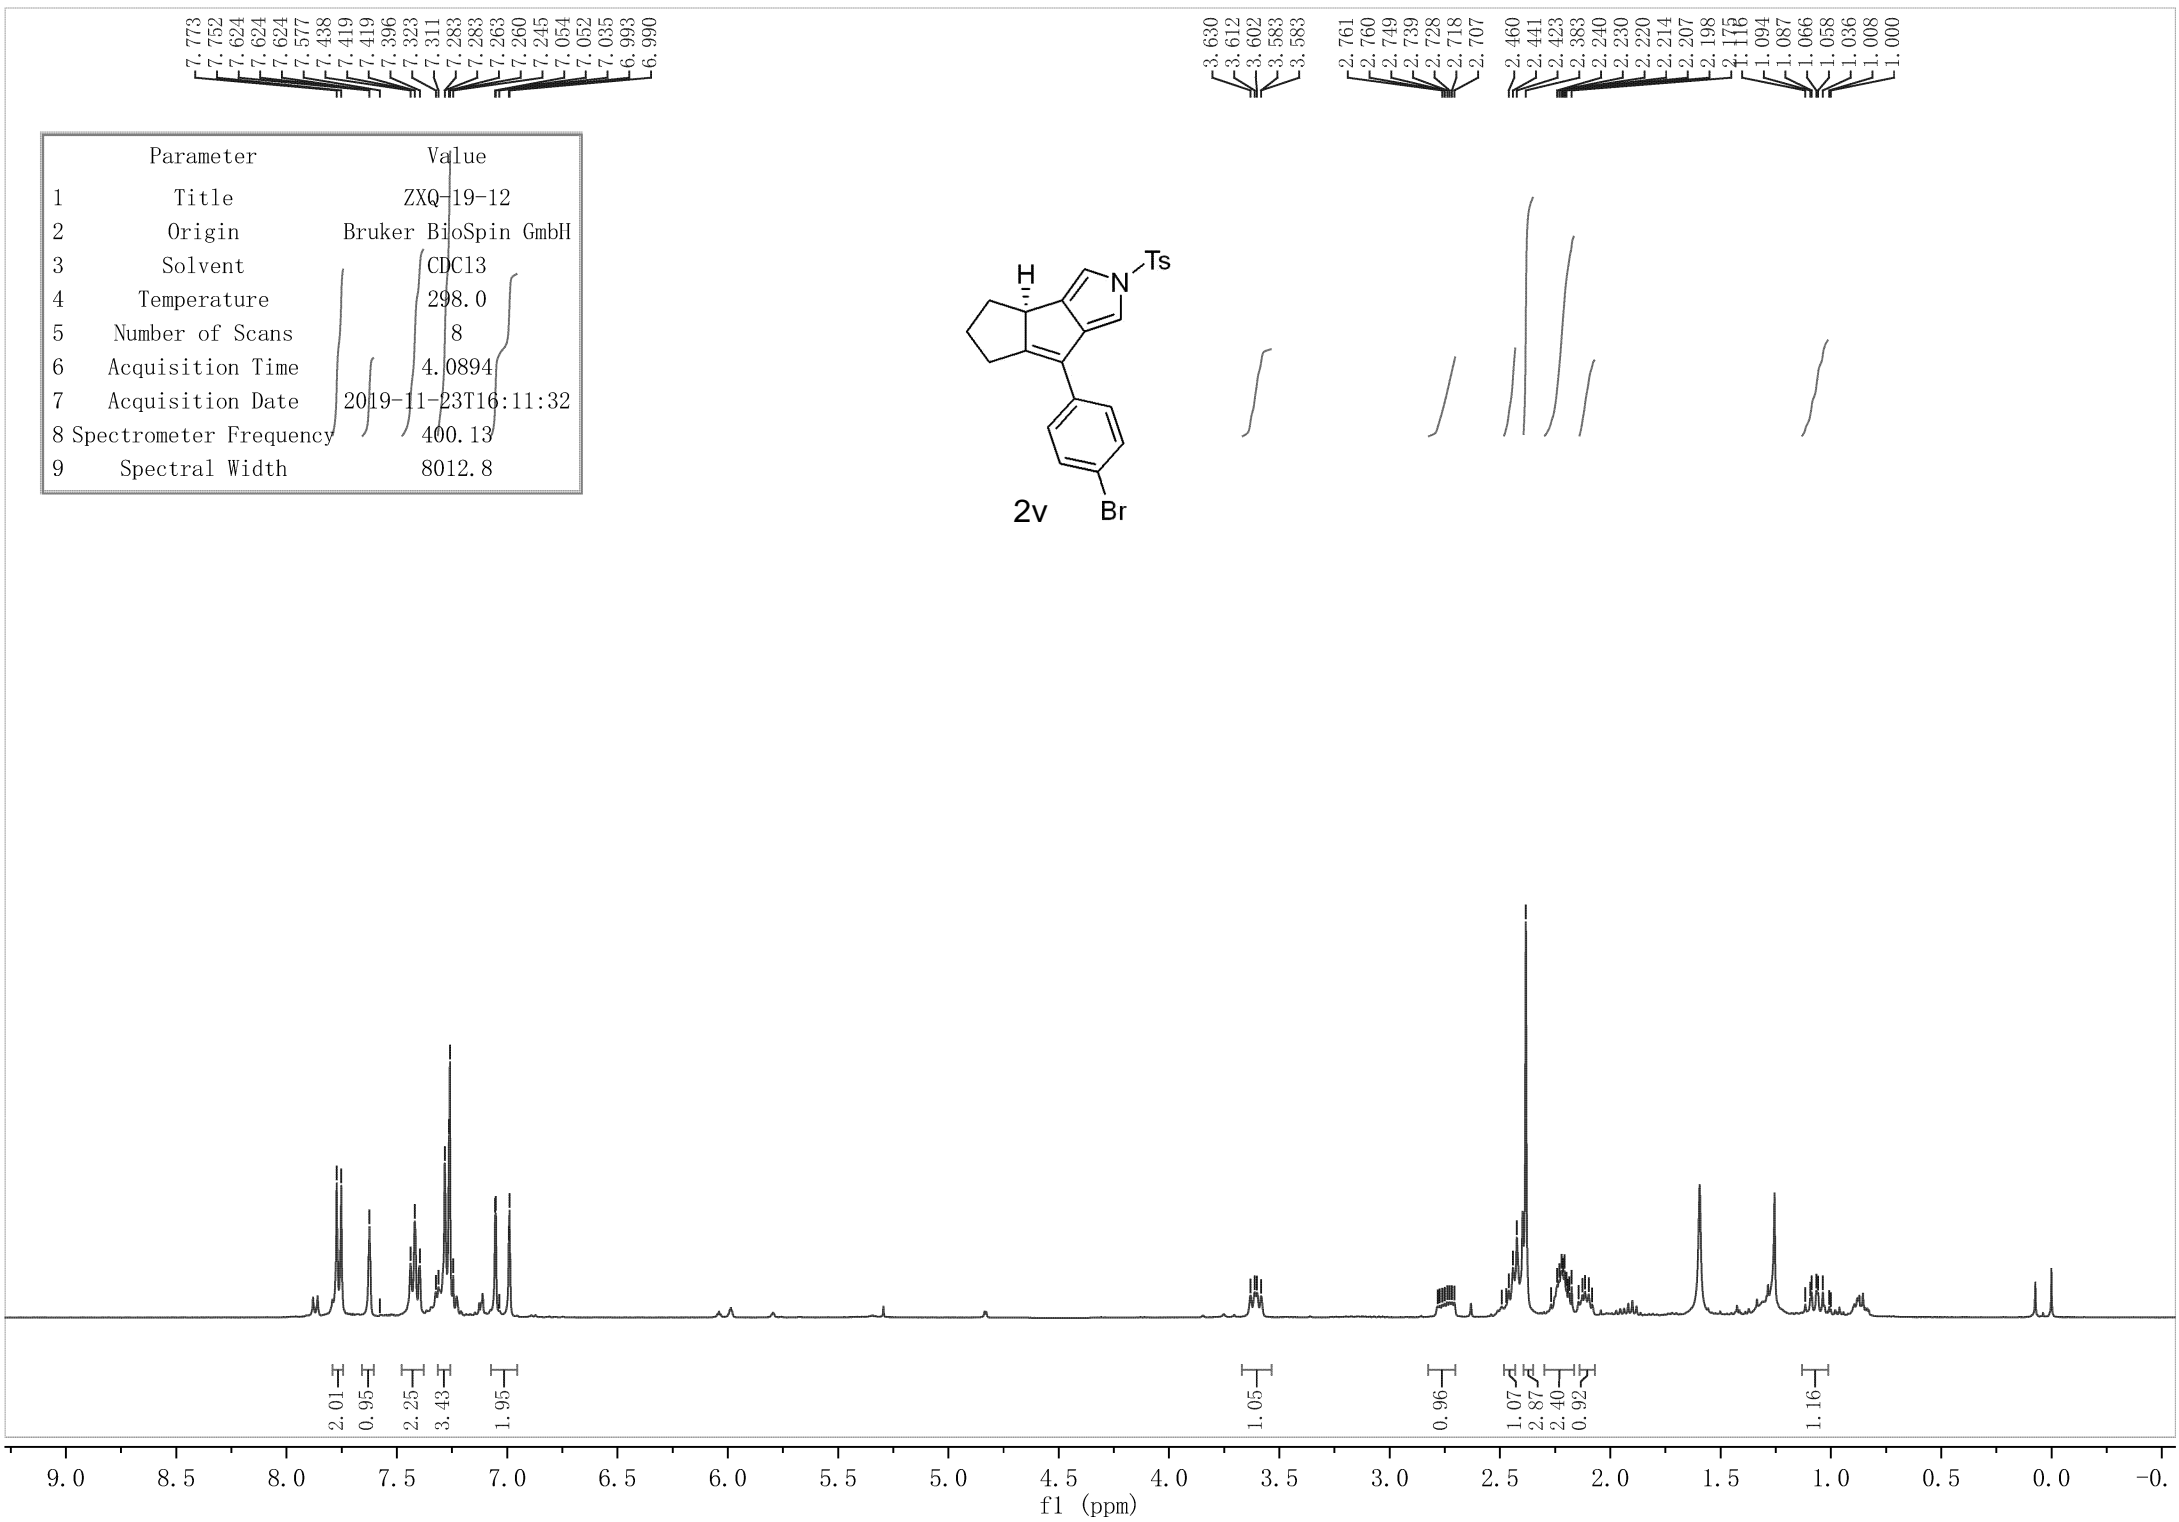

7.773  
7.752  
7.624  
7.624  
7.577  
7.438  
7.419  
7.419  
7.396  
7.323  
7.311  
7.283  
7.283  
7.263  
7.260  
7.245  
7.054  
7.052  
7.035  
6.993  
6.990

3.630  
3.612  
3.602  
3.583  
3.583  
2.761  
2.760  
2.749  
2.739  
2.728  
2.718  
2.707  
2.460  
2.441  
2.423  
2.383  
2.240  
2.230  
2.220  
2.214  
2.207  
2.198  
1.116  
1.094  
1.087  
1.066  
1.058  
1.036  
1.008  
1.000

| Parameter                | Value               |
|--------------------------|---------------------|
| 1 Title                  | ZXQ-19-12-C         |
| 2 Origin                 | Bruker BioSpin GmbH |
| 3 Solvent                | CDC13               |
| 4 Temperature            | 300.0               |
| 5 Number of Scans        | 154                 |
| 6 Acquisition Time       | 1.3631              |
| 7 Acquisition Date       | 2019-11-23T16:13:11 |
| 8 Spectrometer Frequency | 100.61              |
| 9 Spectral Width         | 24038.5             |

161.41

144.55

140.67

136.84

134.50

130.08

130.01

129.98

129.87

126.76

125.80

122.66

113.46

107.83

77.32

77.00

76.68

50.00

29.52

27.76

25.06

21.55

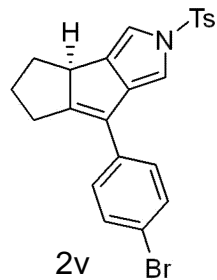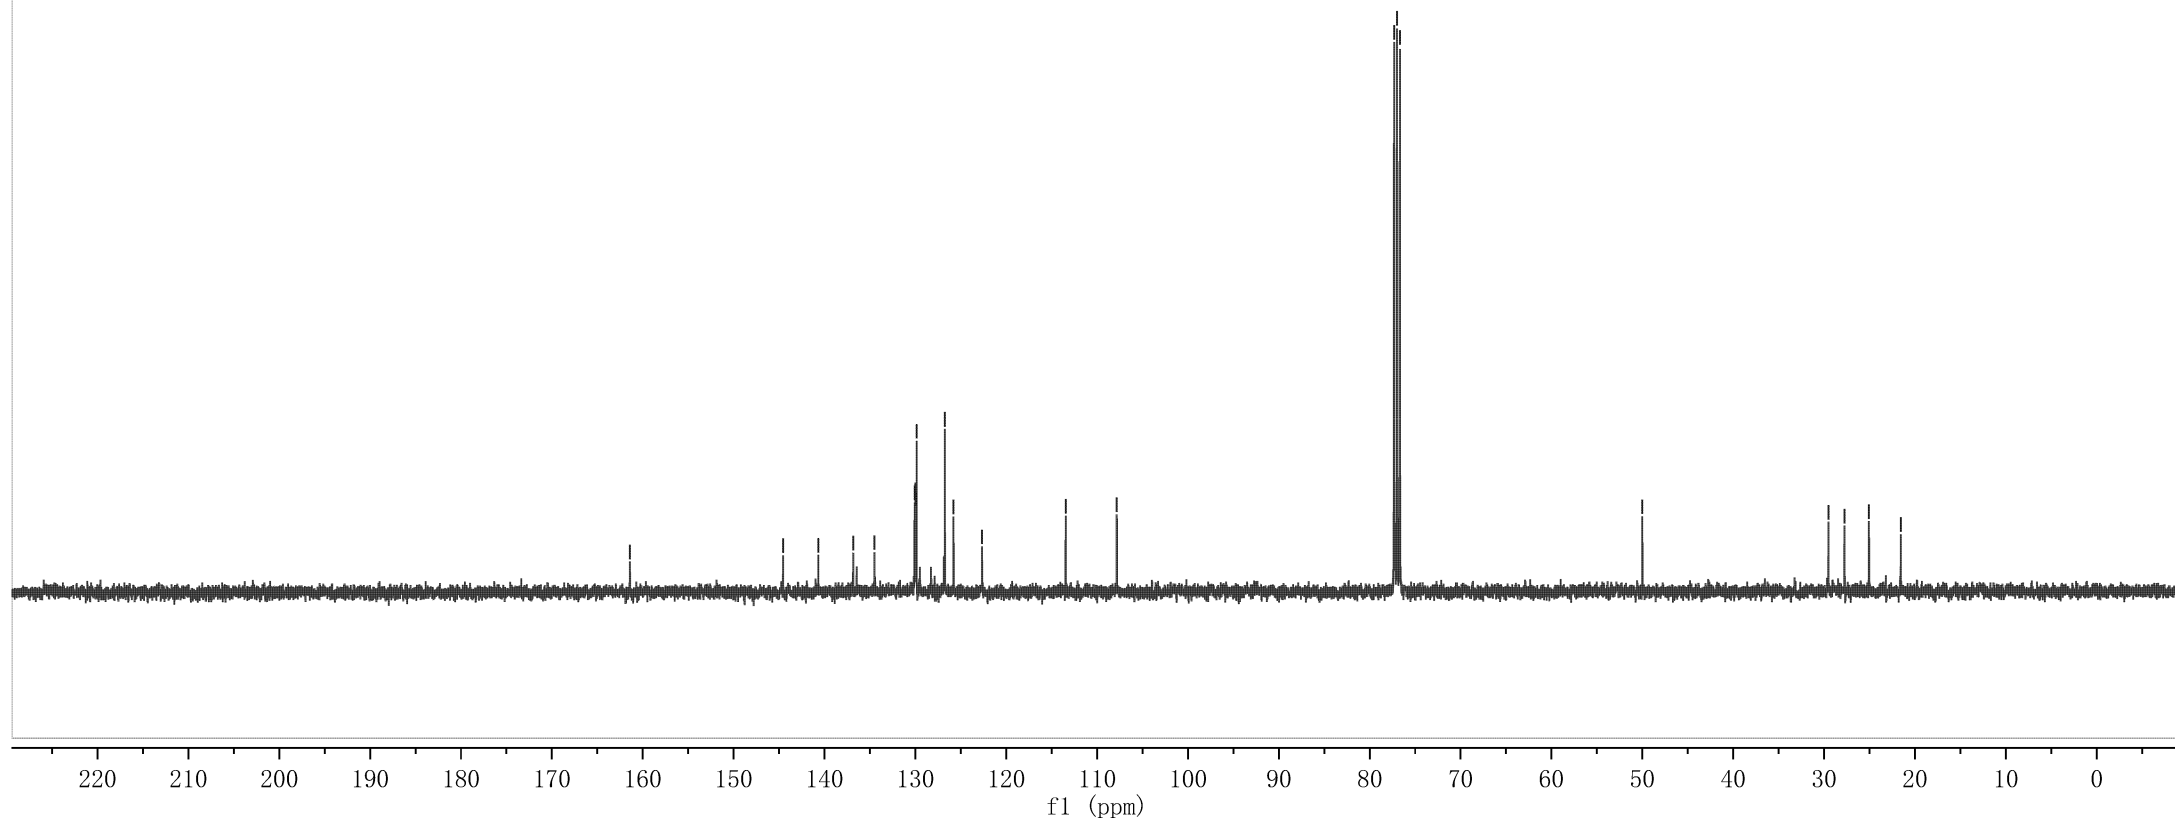

7.759  
7.738  
7.286  
7.274  
7.260  
7.251  
7.240  
7.166  
7.157  
7.108  
7.099  
7.090  
7.086  
7.077  
6.971  
6.968  
6.965  
6.965

3.635  
3.616  
3.606  
3.606  
3.587  
2.636  
2.622  
2.605  
2.561  
2.537  
2.366  
2.261  
2.252  
2.240  
2.231  
2.225  
2.220  
2.217  
2.210  
2.204  
2.116  
2.110  
2.106  
2.098  
2.087  
1.132  
1.104  
1.078  
1.075  
1.053  
1.048  
1.024

| Parameter                | Value               |
|--------------------------|---------------------|
| 1 Title                  | ZXQ-18-217          |
| 2 Origin                 | Bruker BioSpin GmbH |
| 3 Solvent                | CDC13               |
| 4 Temperature            | 298.0               |
| 5 Number of Scans        | 8                   |
| 6 Acquisition Time       | 4.0894              |
| 7 Acquisition Date       | 2019-11-08T18:43:49 |
| 8 Spectrometer Frequency | 400.13              |
| 9 Spectral Width         | 8012.8              |

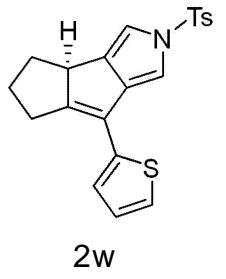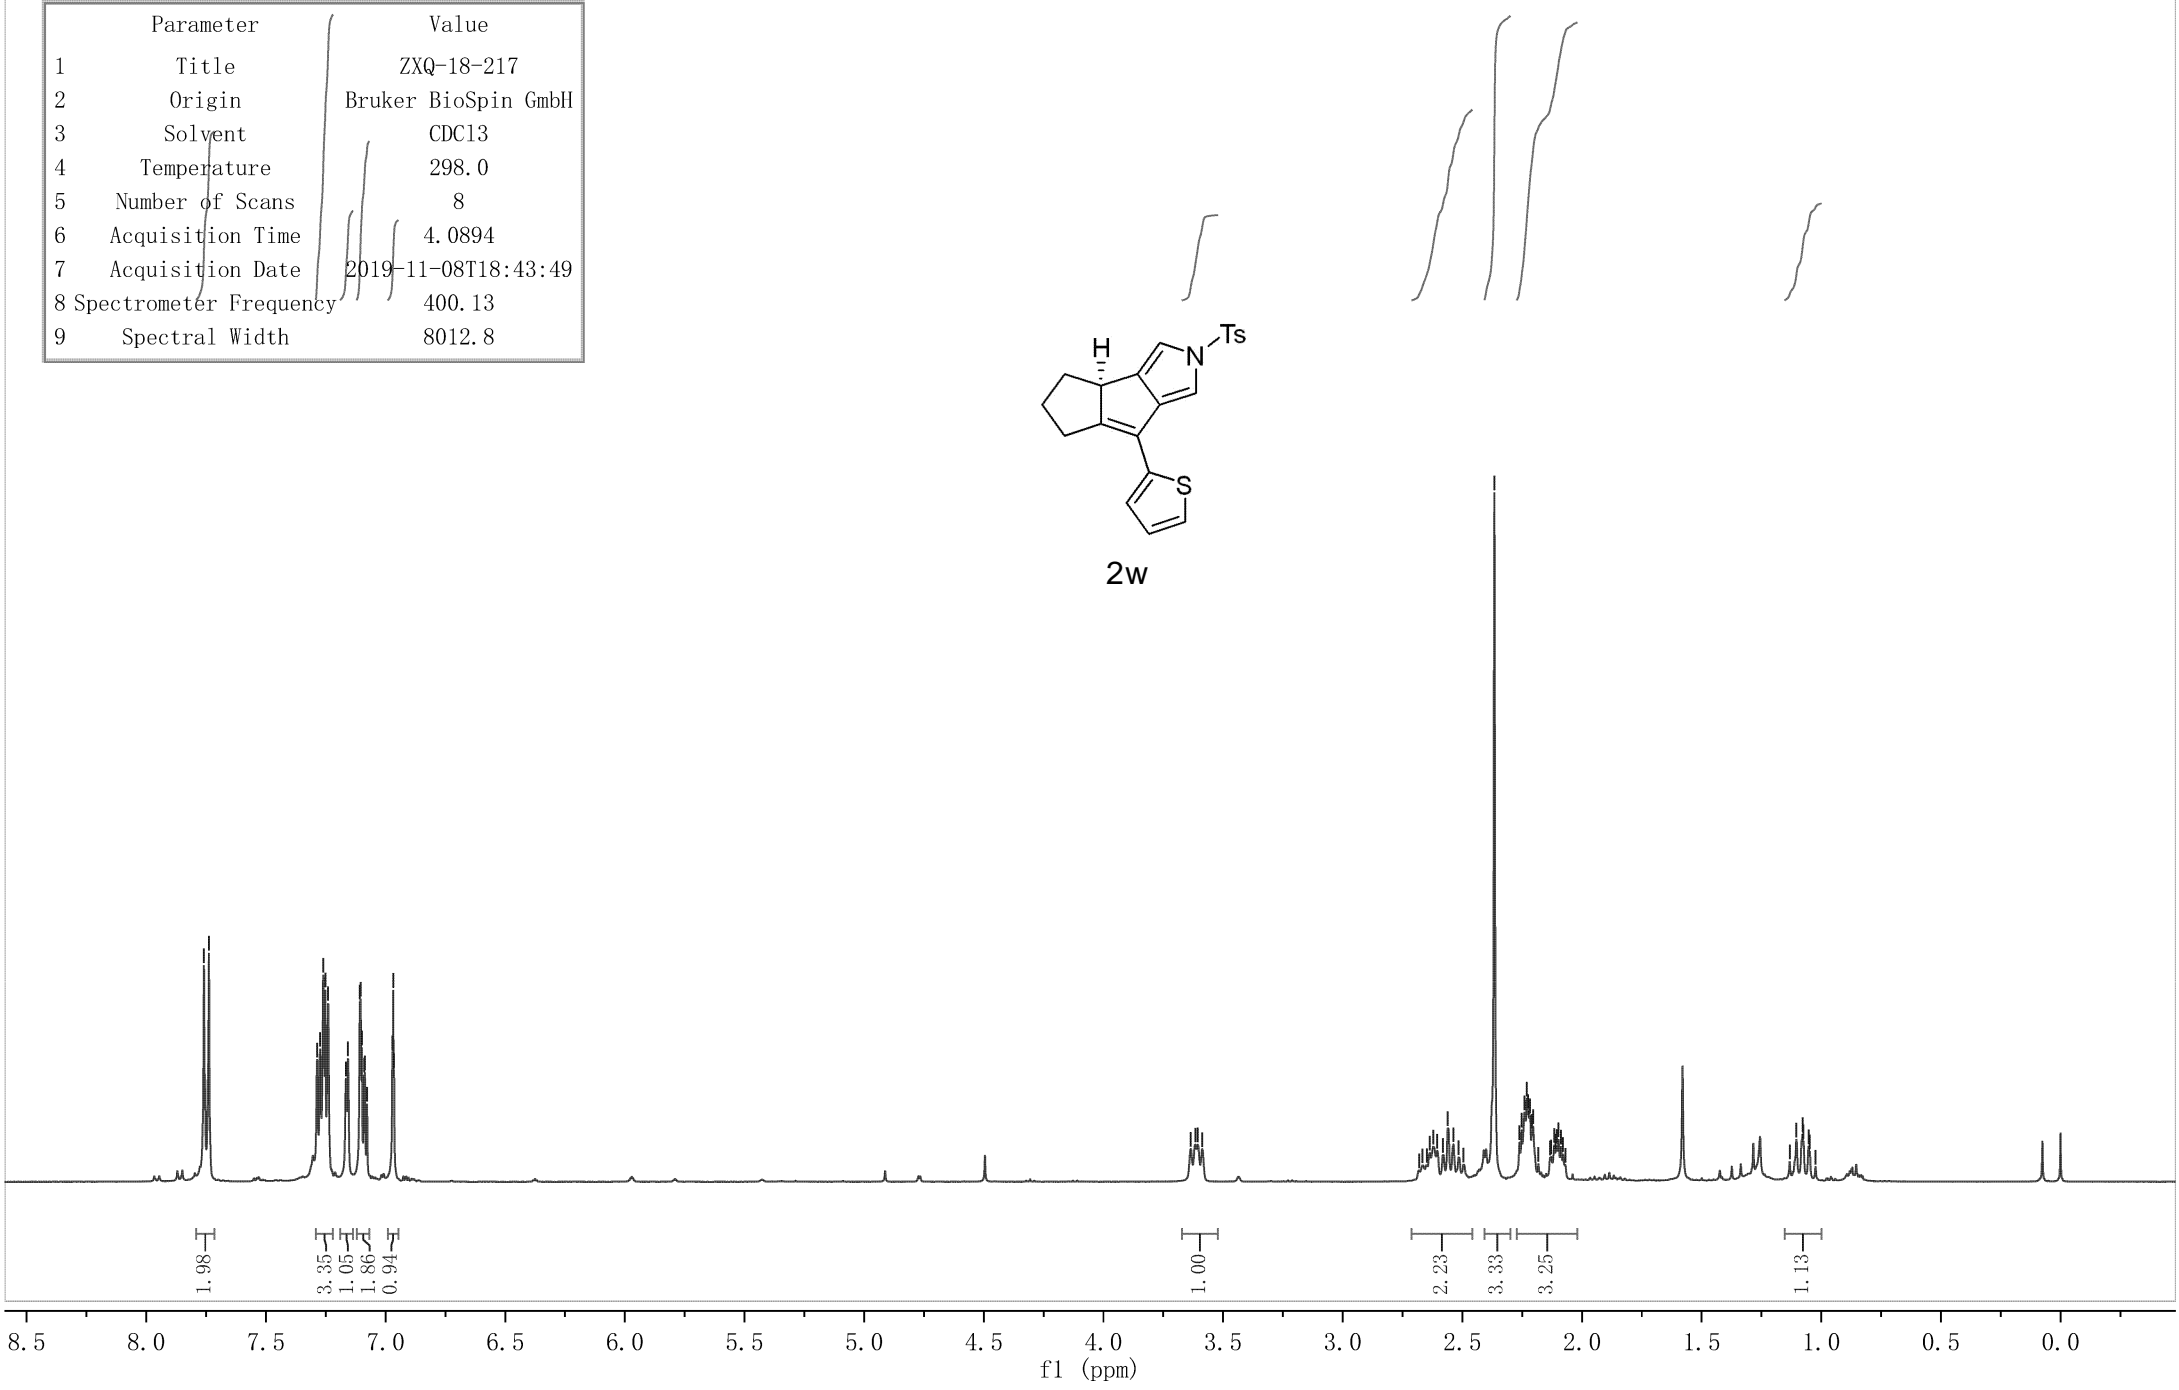

| Parameter                | Value               |
|--------------------------|---------------------|
| 1 Title                  | ZXQ-18-217-C        |
| 2 Origin                 | Bruker BioSpin GmbH |
| 3 Solvent                | CDC13               |
| 4 Temperature            | 300.0               |
| 5 Number of Scans        | 55                  |
| 6 Acquisition Time       | 1.3631              |
| 7 Acquisition Date       | 2019-11-09T16:49:02 |
| 8 Spectrometer Frequency | 100.61              |
| 9 Spectral Width         | 24038.5             |

158.56  
 144.48  
 141.05  
 137.88  
 136.44  
 134.41  
 129.82  
 127.34  
 126.70  
 124.42  
 124.31  
 121.72  
 113.30  
 107.94  
 77.32  
 77.00  
 76.68  
 50.01  
 29.71  
 28.07  
 25.16  
 21.53

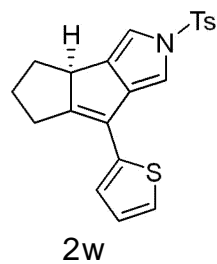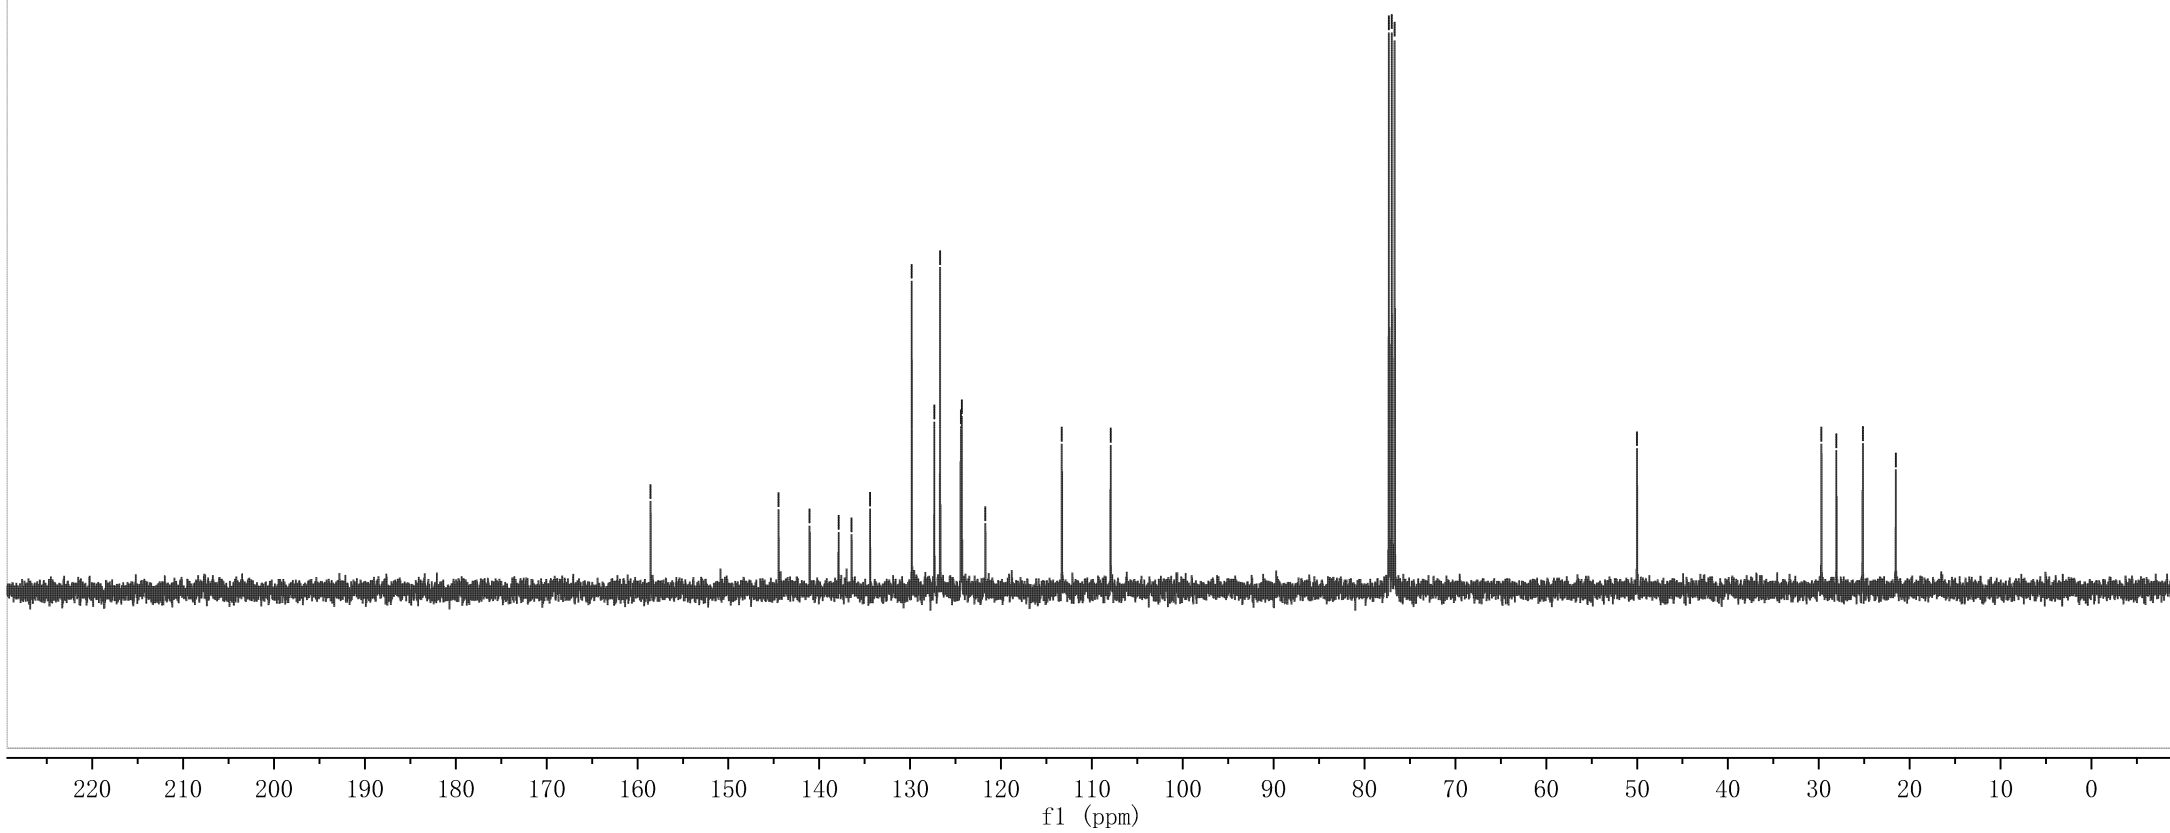

7.754  
7.733  
7.361  
7.354  
7.349  
7.342  
7.334  
7.306  
7.303  
7.294  
7.291  
7.257  
7.251  
7.237  
7.046  
7.043  
6.973  
6.970  
6.966  
6.966

3.604  
3.602  
3.583  
3.574  
3.556

2.645  
2.495  
2.492  
2.471  
2.451  
2.428  
2.365  
2.232  
2.225  
2.218  
2.212  
2.208  
2.204  
2.198  
2.187  
2.109  
2.100  
2.094  
1.112  
1.112  
1.087  
1.084  
1.061  
1.057  
1.034  
1.034  
1.031  
1.005

| Parameter                | Value               |
|--------------------------|---------------------|
| 1 Title                  | ZXQ-18-213          |
| 2 Origin                 | Bruker BioSpin GmbH |
| 3 Solvent                | CDC13               |
| 4 Temperature            | 298.0               |
| 5 Number of Scans        | 7                   |
| 6 Acquisition Time       | 4.0894              |
| 7 Acquisition Date       | 2019-11-05T11:05:35 |
| 8 Spectrometer Frequency | 400.13              |
| 9 Spectral Width         | 8012.8              |

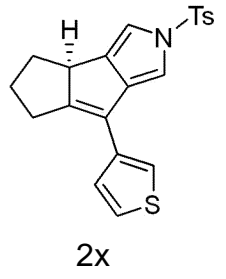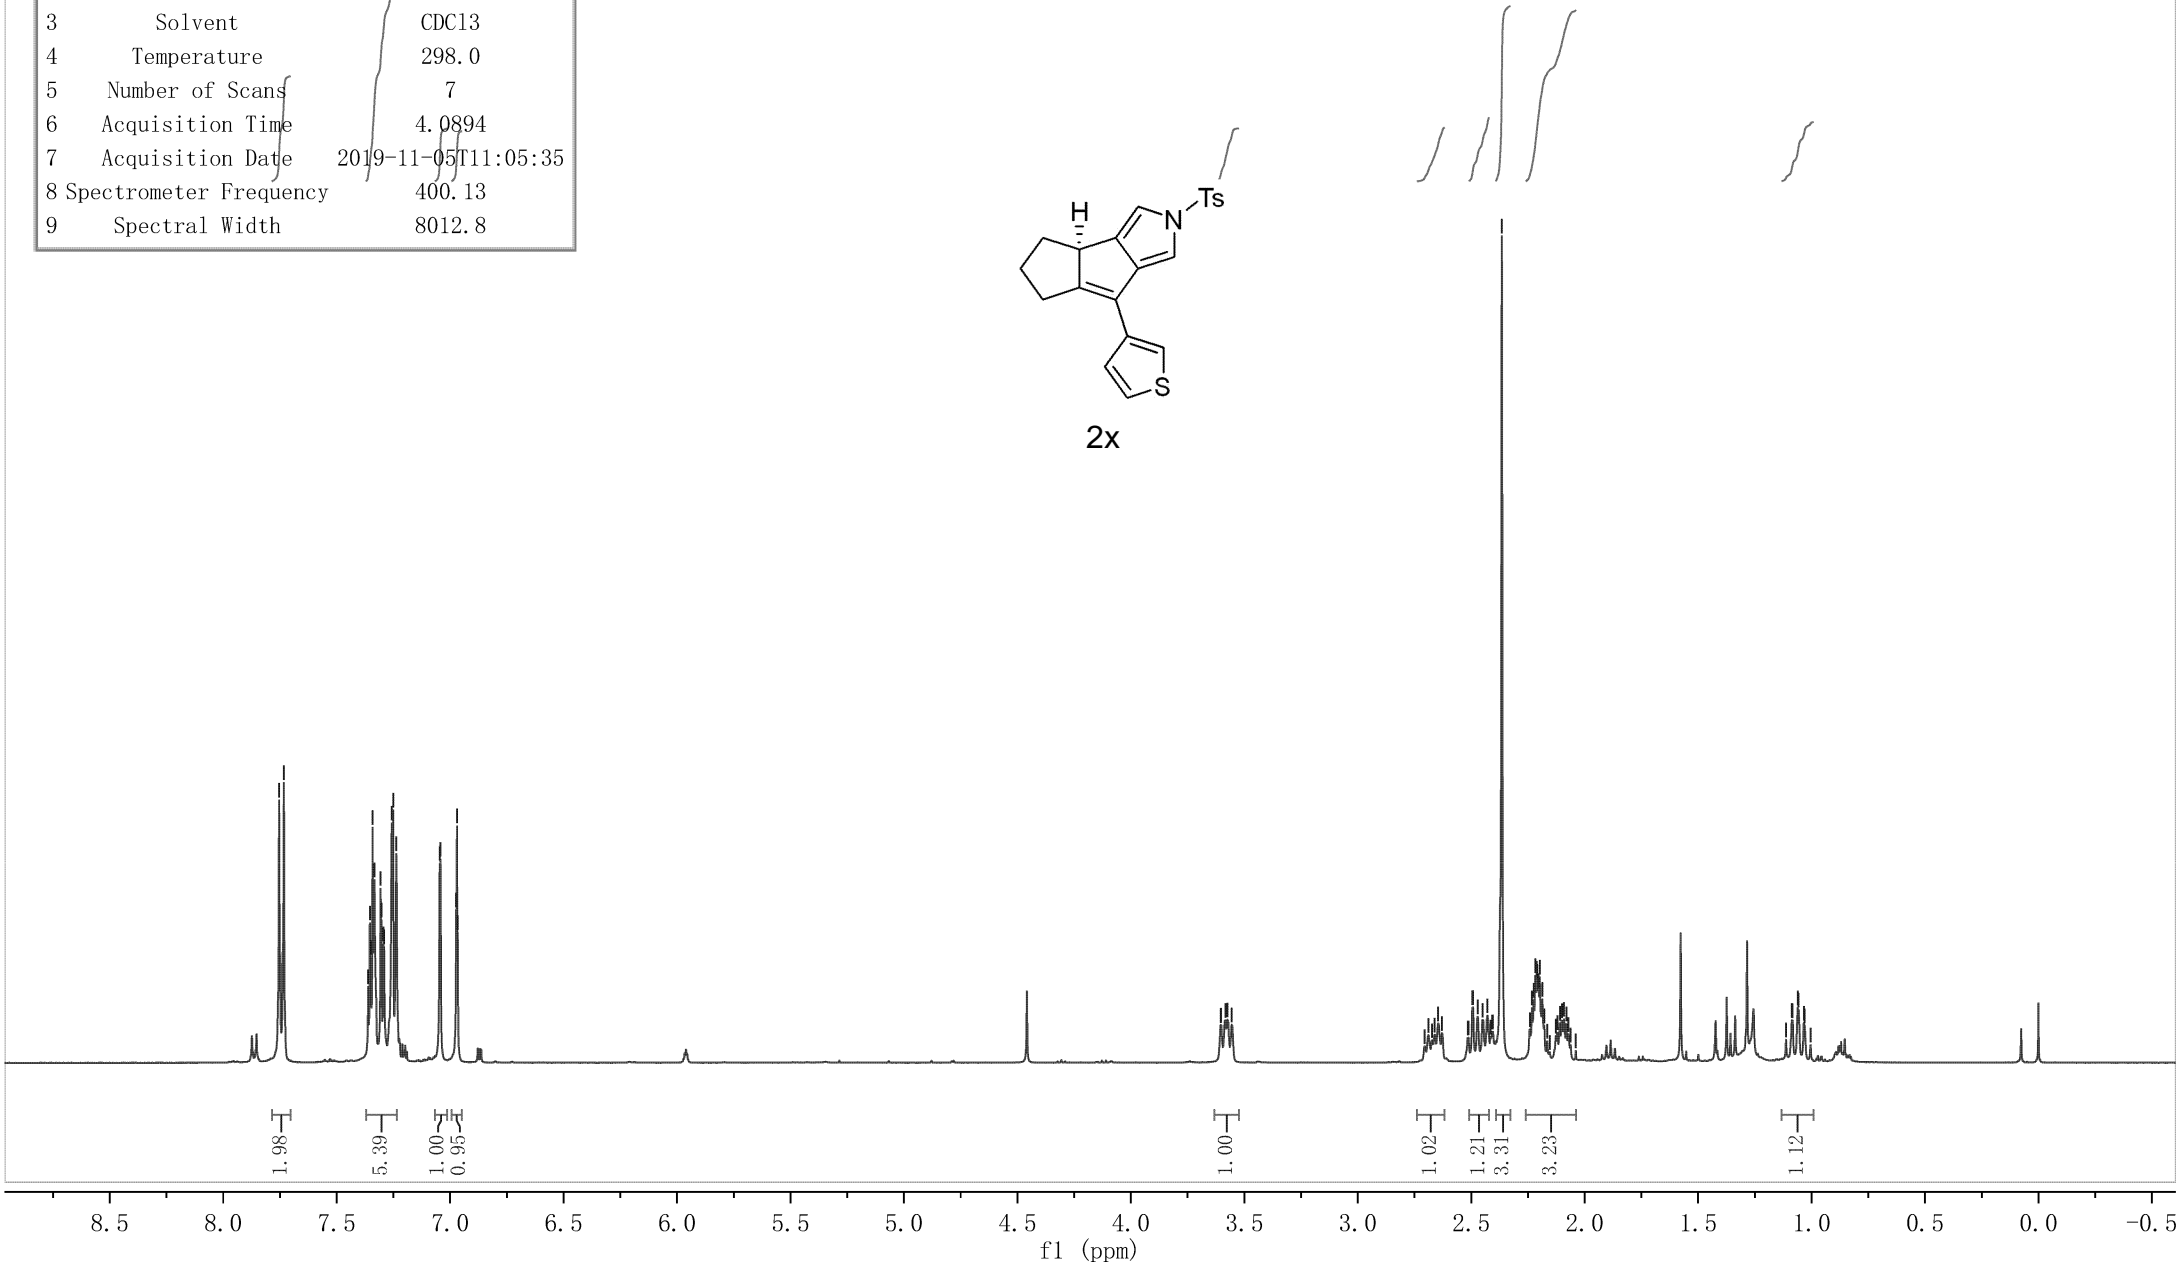

8.5 8.0 7.5 7.0 6.5 6.0 5.5 5.0 4.5 4.0 3.5 3.0 2.5 2.0 1.5 1.0 0.5 0.0 -0.5  
f1 (ppm)

| Parameter                | Value               |
|--------------------------|---------------------|
| 1 Title                  | ZXQ-18-213-C-1      |
| 2 Origin                 | Bruker BioSpin GmbH |
| 3 Solvent                | CDC13               |
| 4 Temperature            | 300.0               |
| 5 Number of Scans        | 74                  |
| 6 Acquisition Time       | 1.3631              |
| 7 Acquisition Date       | 2019-11-05T17:42:14 |
| 8 Spectrometer Frequency | 100.61              |
| 9 Spectral Width         | 24038.5             |

158.54  
 144.43  
 141.62  
 136.48  
 135.99  
 134.69  
 129.80  
 126.68  
 125.58  
 122.84  
 121.42  
 113.31  
 107.57  
 77.32  
 77.00  
 76.68  
 49.72  
 29.58  
 28.01  
 24.94  
 21.52

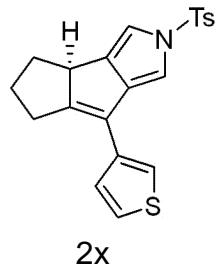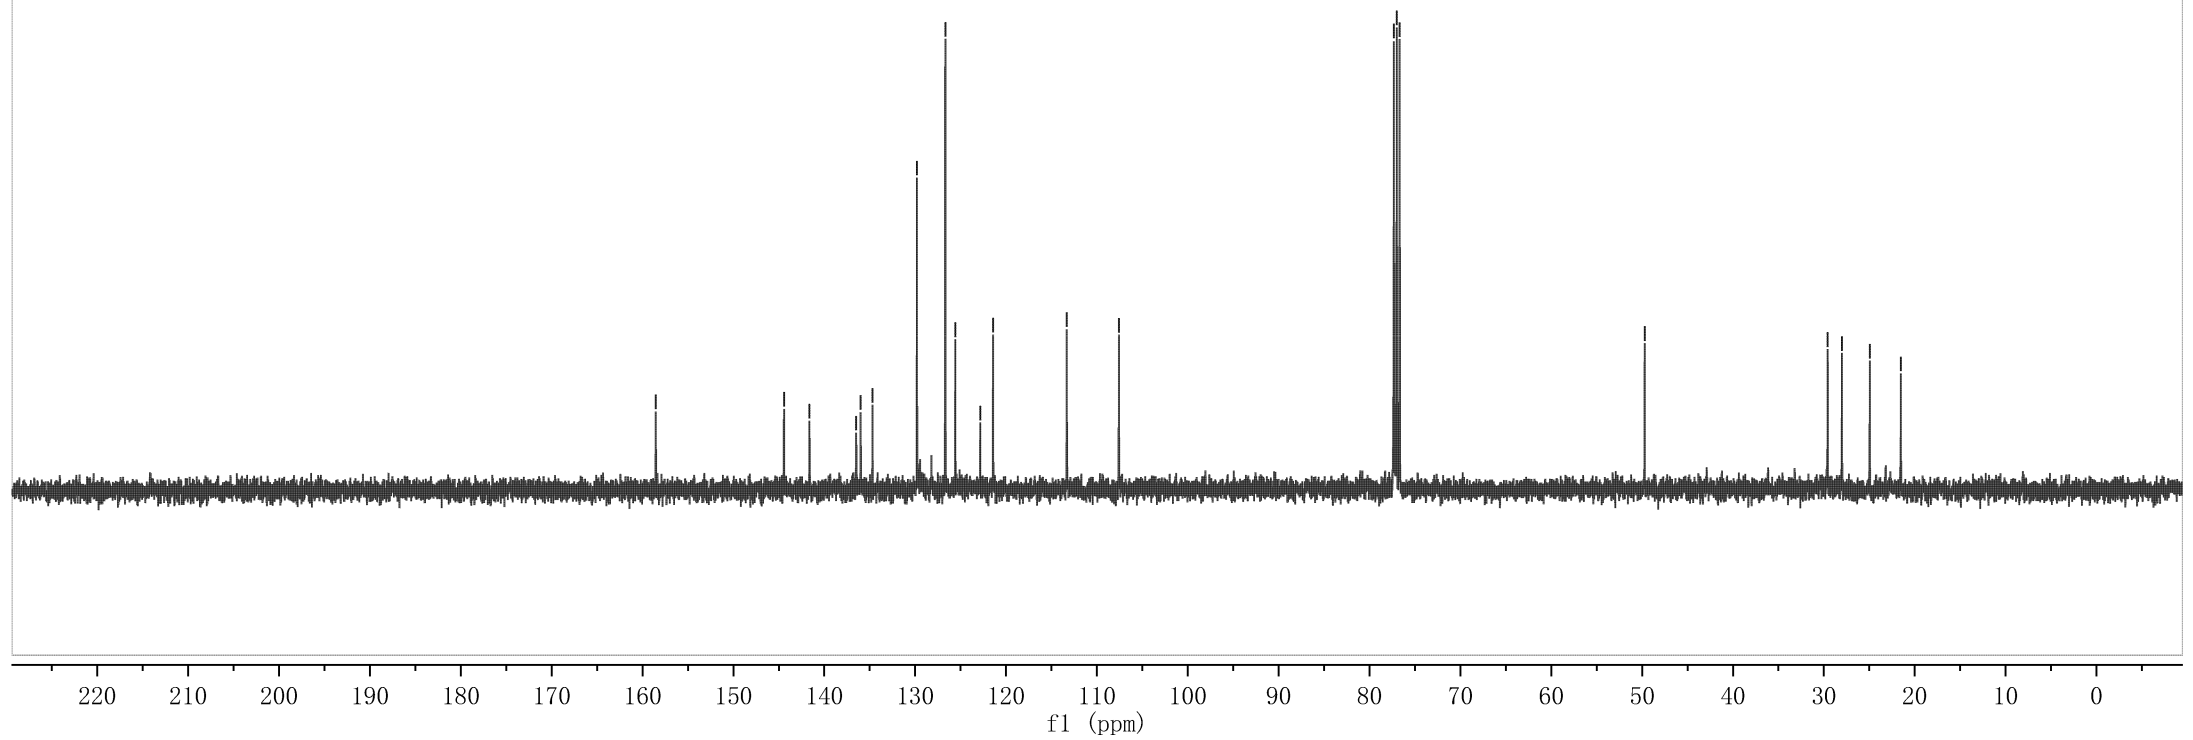



7.748  
7.727  
7.435  
7.413  
7.269  
7.257  
7.249  
6.912  
6.870  
6.848

3.819  
3.613  
3.586  
3.566  
3.555  
3.537

2.548  
2.528  
2.512  
2.382  
2.220  
2.205  
2.199  
2.185  
2.173  
2.159  
2.099  
2.090  
2.085  
2.071  
2.057  
2.052  
2.042

1.148  
1.138  
1.120  
1.099  
1.070  
1.041

| Parameter                | Value               |
|--------------------------|---------------------|
| 1 Title                  | ZXQ-19-45           |
| 2 Origin                 | Bruker BioSpin GmbH |
| 3 Solvent                | CDCl3               |
| 4 Temperature            | 298.0               |
| 5 Number of Scans        | 8                   |
| 6 Acquisition Time       | 4.0894              |
| 7 Acquisition Date       | 2019-11-21T16:09:49 |
| 8 Spectrometer Frequency | 400.13              |
| 9 Spectral Width         | 8012.8              |

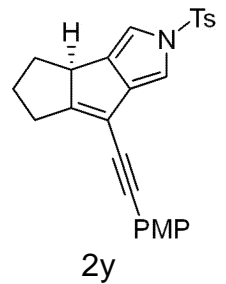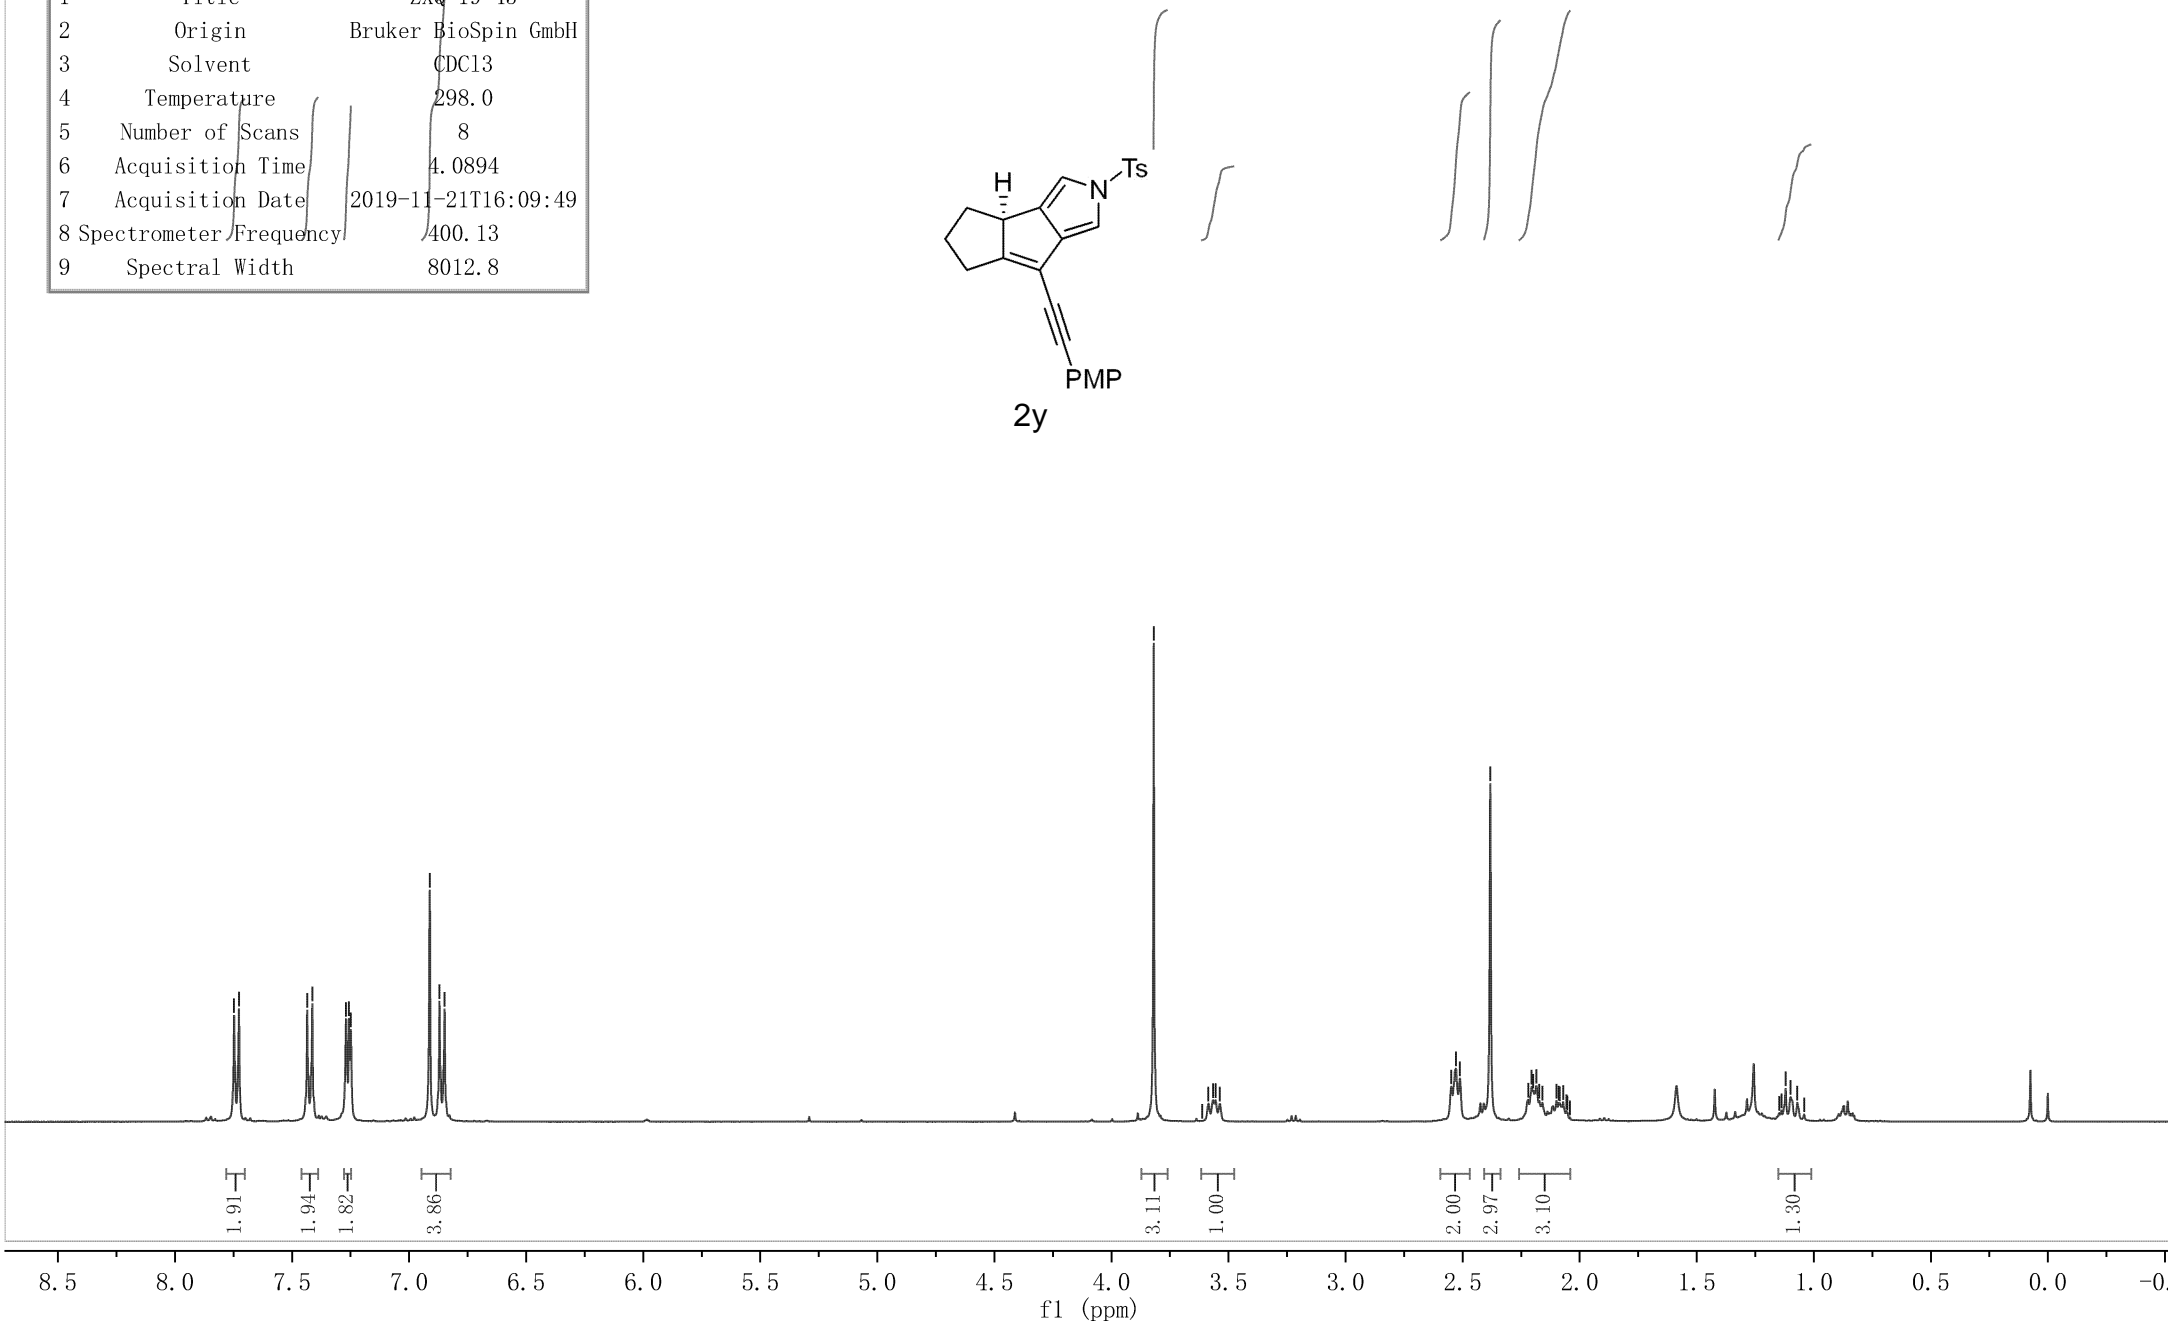

| Parameter                | Value               |
|--------------------------|---------------------|
| 1 Title                  | ZXQ-19-45-C         |
| 2 Origin                 | Bruker BioSpin GmbH |
| 3 Solvent                | CDC13               |
| 4 Temperature            | 300.0               |
| 5 Number of Scans        | 102                 |
| 6 Acquisition Time       | 1.3631              |
| 7 Acquisition Date       | 2019-11-21T16:11:12 |
| 8 Spectrometer Frequency | 100.61              |
| 9 Spectral Width         | 24038.5             |

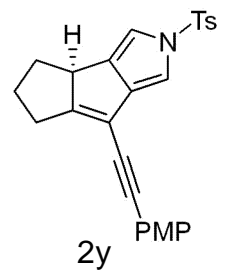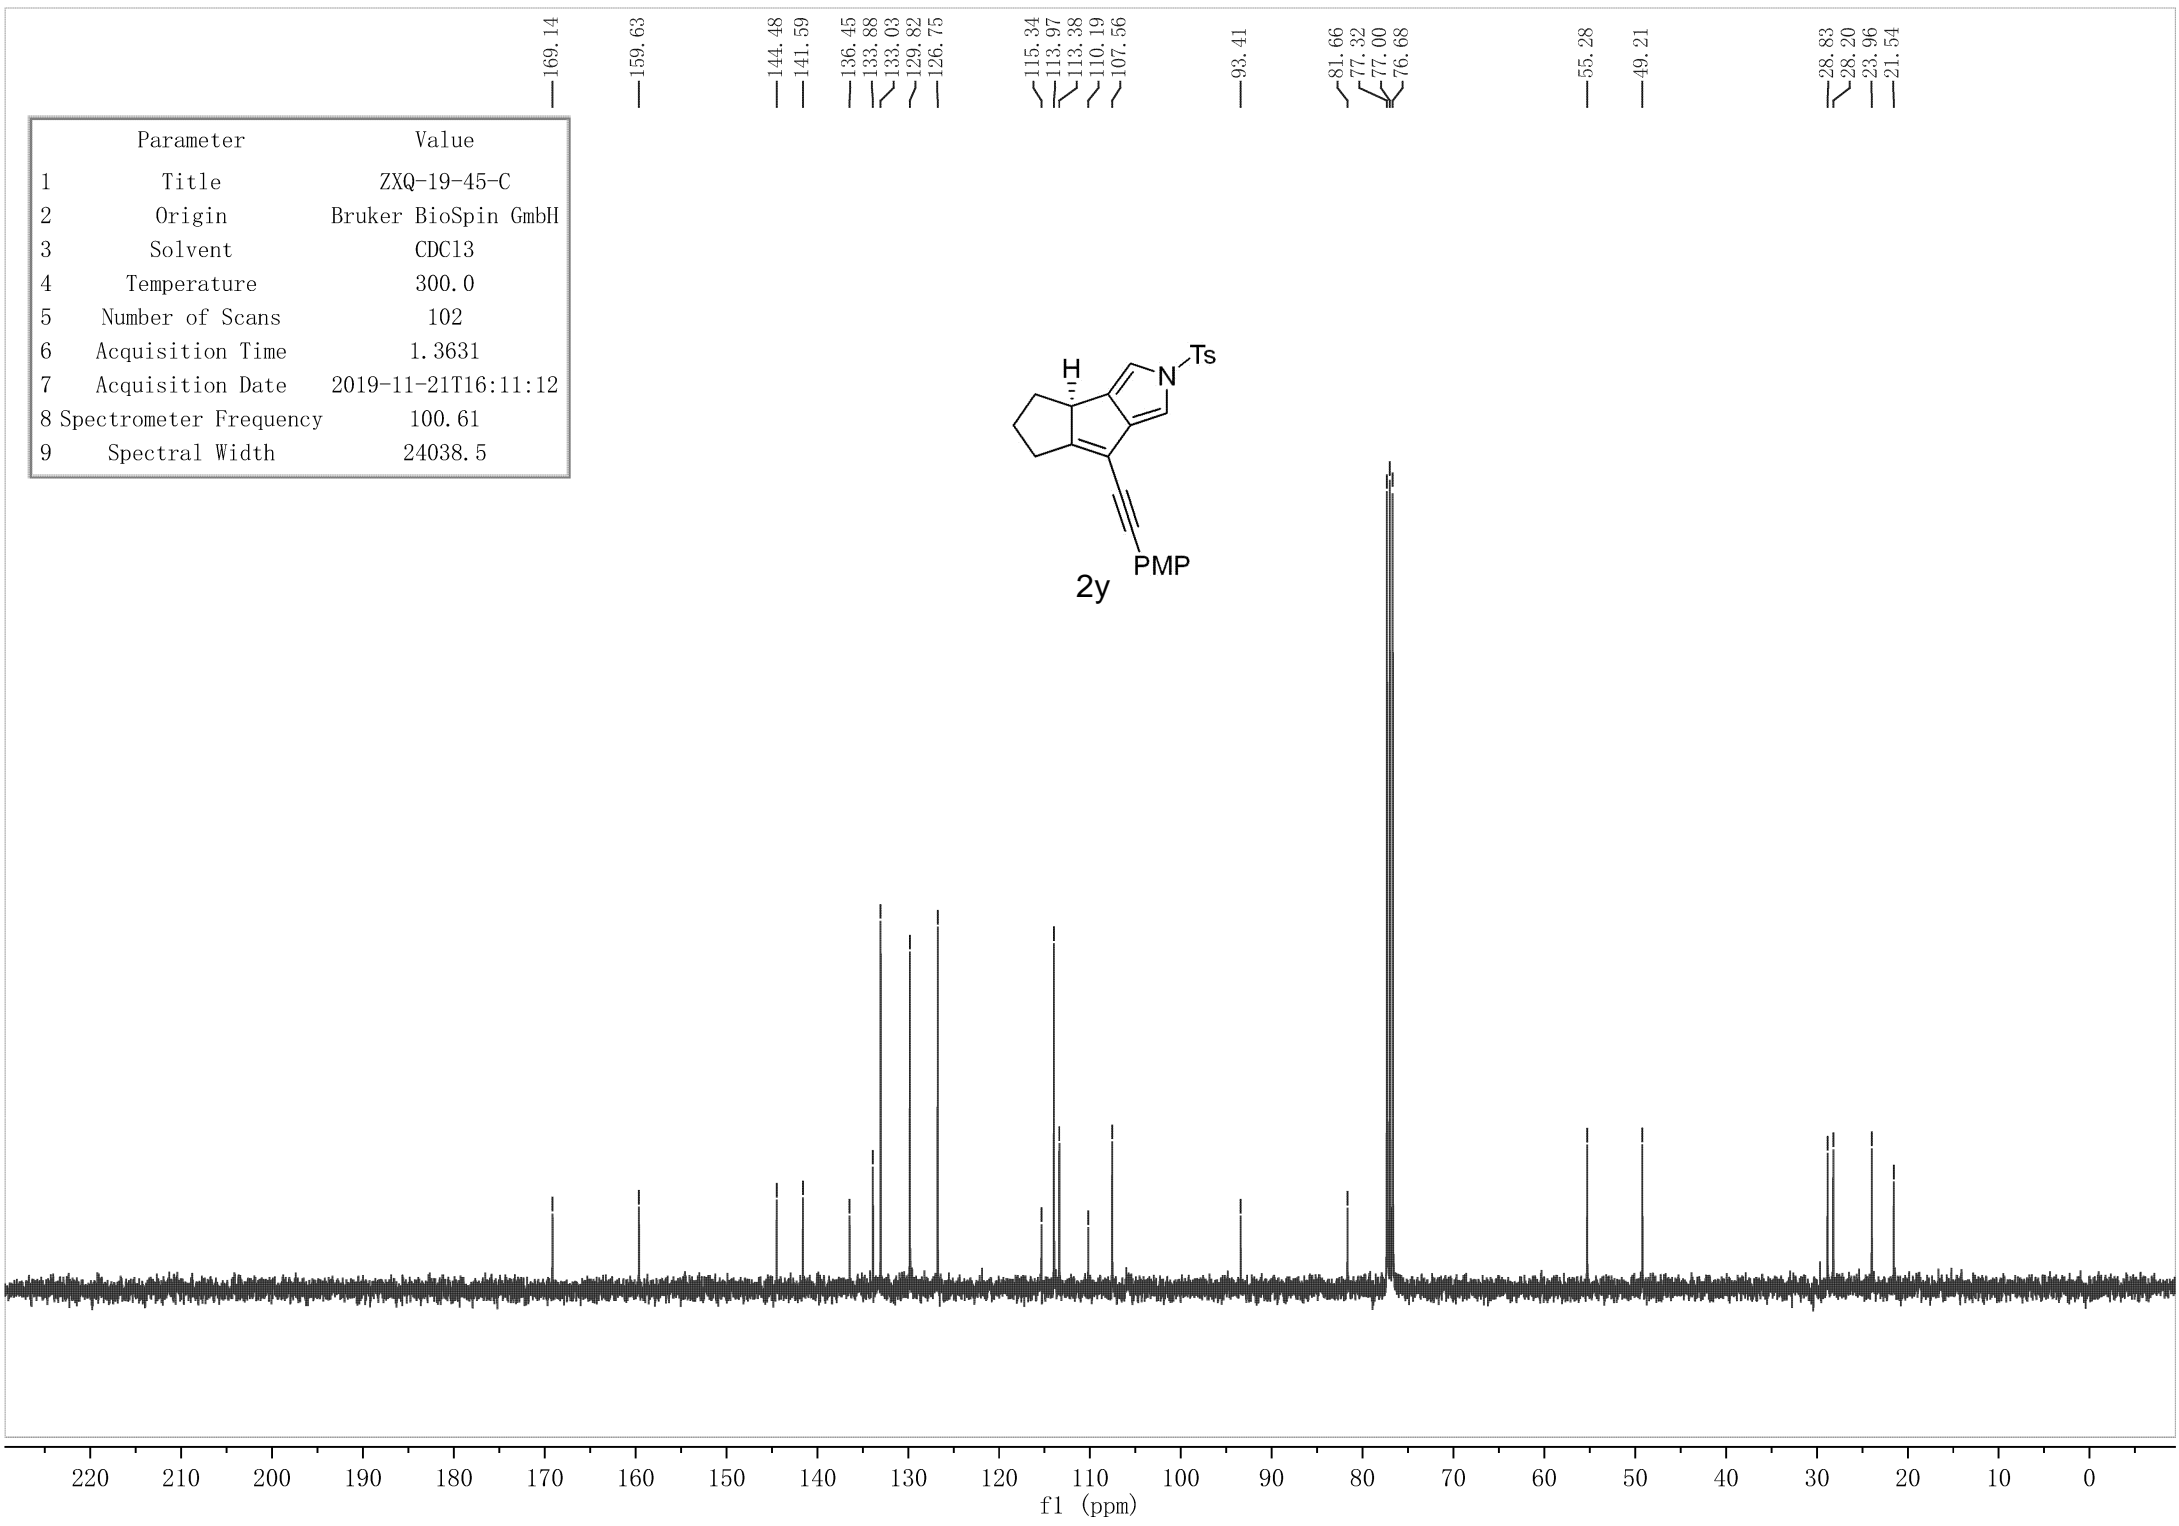

| Parameter                | Value               |
|--------------------------|---------------------|
| 1 Title                  | ZXQ-19-45-C-DEPT    |
| 2 Origin                 | Bruker BioSpin GmbH |
| 3 Solvent                | CDC13               |
| 4 Temperature            | 300.0               |
| 5 Number of Scans        | 27                  |
| 6 Acquisition Time       | 1.3631              |
| 7 Acquisition Date       | 2019-11-21T16:17:40 |
| 8 Spectrometer Frequency | 100.61              |
| 9 Spectral Width         | 24038.5             |

133.03  
 129.82  
 126.75  
 113.97  
 113.38  
 107.56  
 55.28  
 49.21  
 28.83  
 28.21  
 23.96  
 21.54

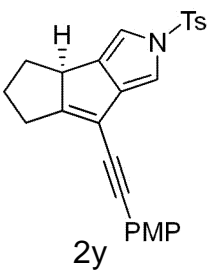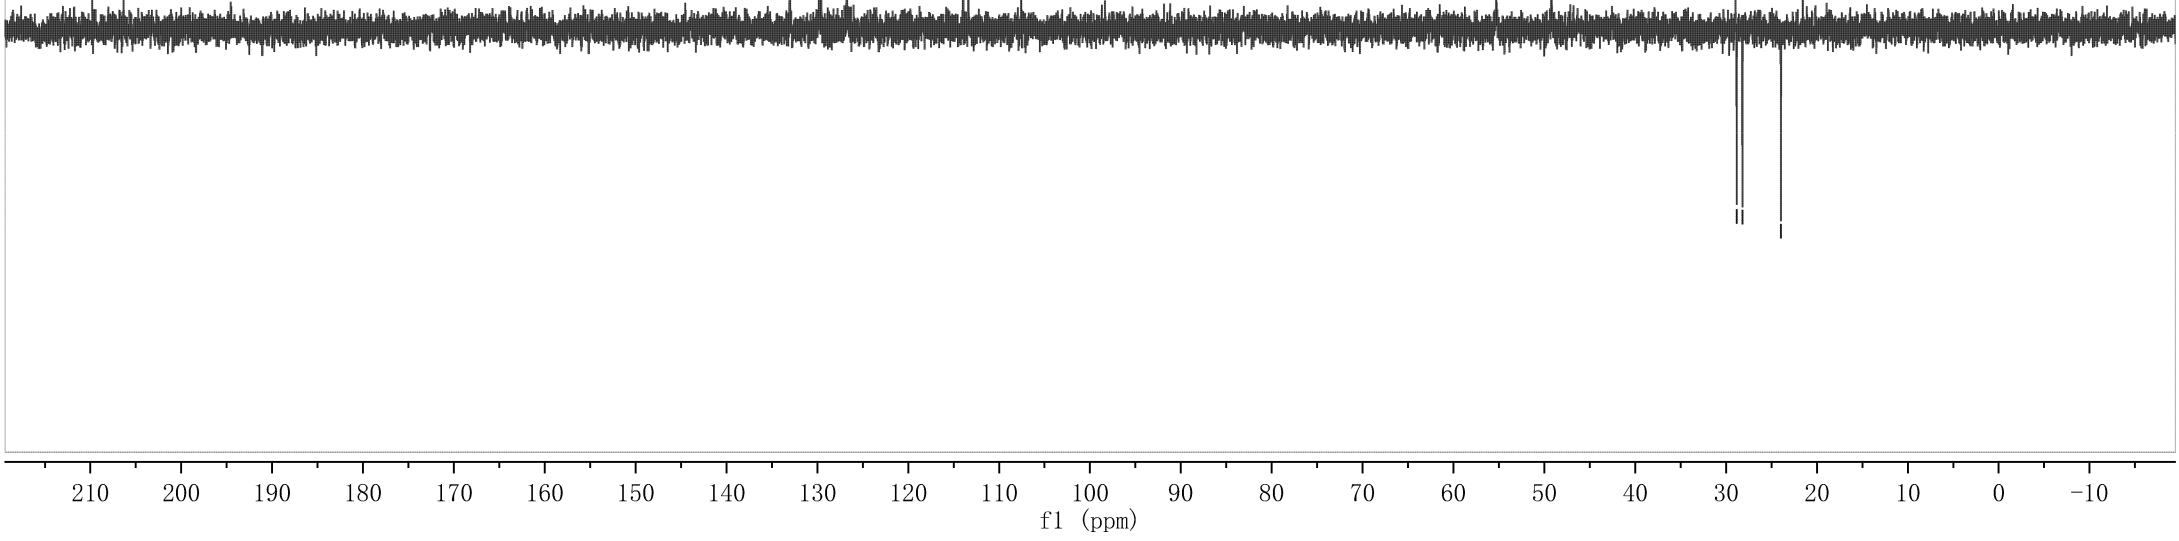

7.752  
7.731  
7.500  
7.478  
7.250  
7.170  
6.965  
6.948  
6.738  
6.726  
6.324  
6.318

3.528  
3.512  
3.493  
3.491  
3.475  
2.976  
2.365  
1.263  
1.244

| Parameter                | Value               |
|--------------------------|---------------------|
| 1 Title                  | ZXQ-20-43           |
| 2 Origin                 | Bruker BioSpin GmbH |
| 3 Solvent                | CDC13               |
| 4 Temperature            | 298.2               |
| 5 Number of Scans        | 10                  |
| 6 Acquisition Time       | 3.9846              |
| 7 Acquisition Date       | 2020-04-16T15:23:22 |
| 8 Spectrometer Frequency | 400.03              |
| 9 Spectral Width         | 8223.7              |

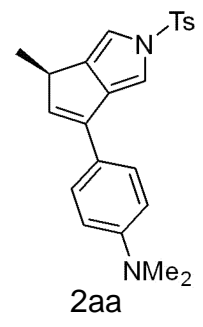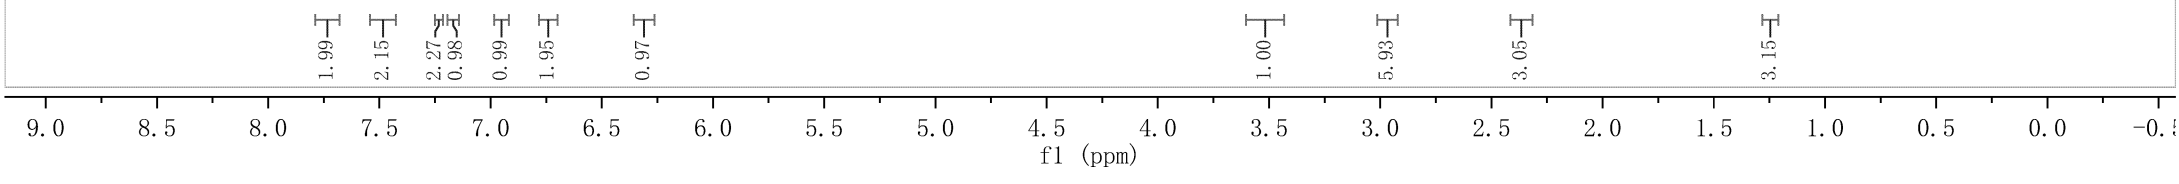

| Parameter                | Value               |
|--------------------------|---------------------|
| 1 Title                  | ZXQ-20-43-C-        |
| 2 Origin                 | Bruker BioSpin GmbH |
| 3 Solvent                | CDC13               |
| 4 Temperature            | 298.5               |
| 5 Number of Scans        | 174                 |
| 6 Acquisition Time       | 1.3631              |
| 7 Acquisition Date       | 2020-04-16T15:26:21 |
| 8 Spectrometer Frequency | 100.59              |
| 9 Spectral Width         | 24038.5             |

150.17 144.44 140.40 137.12 136.52 136.42 135.55 129.81 127.10 126.69 122.77 112.32 111.52 109.13 77.32 77.00 76.68 40.46 37.97 21.53 18.14

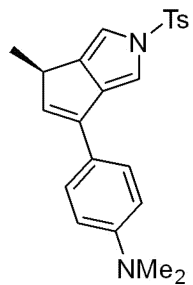

2aa

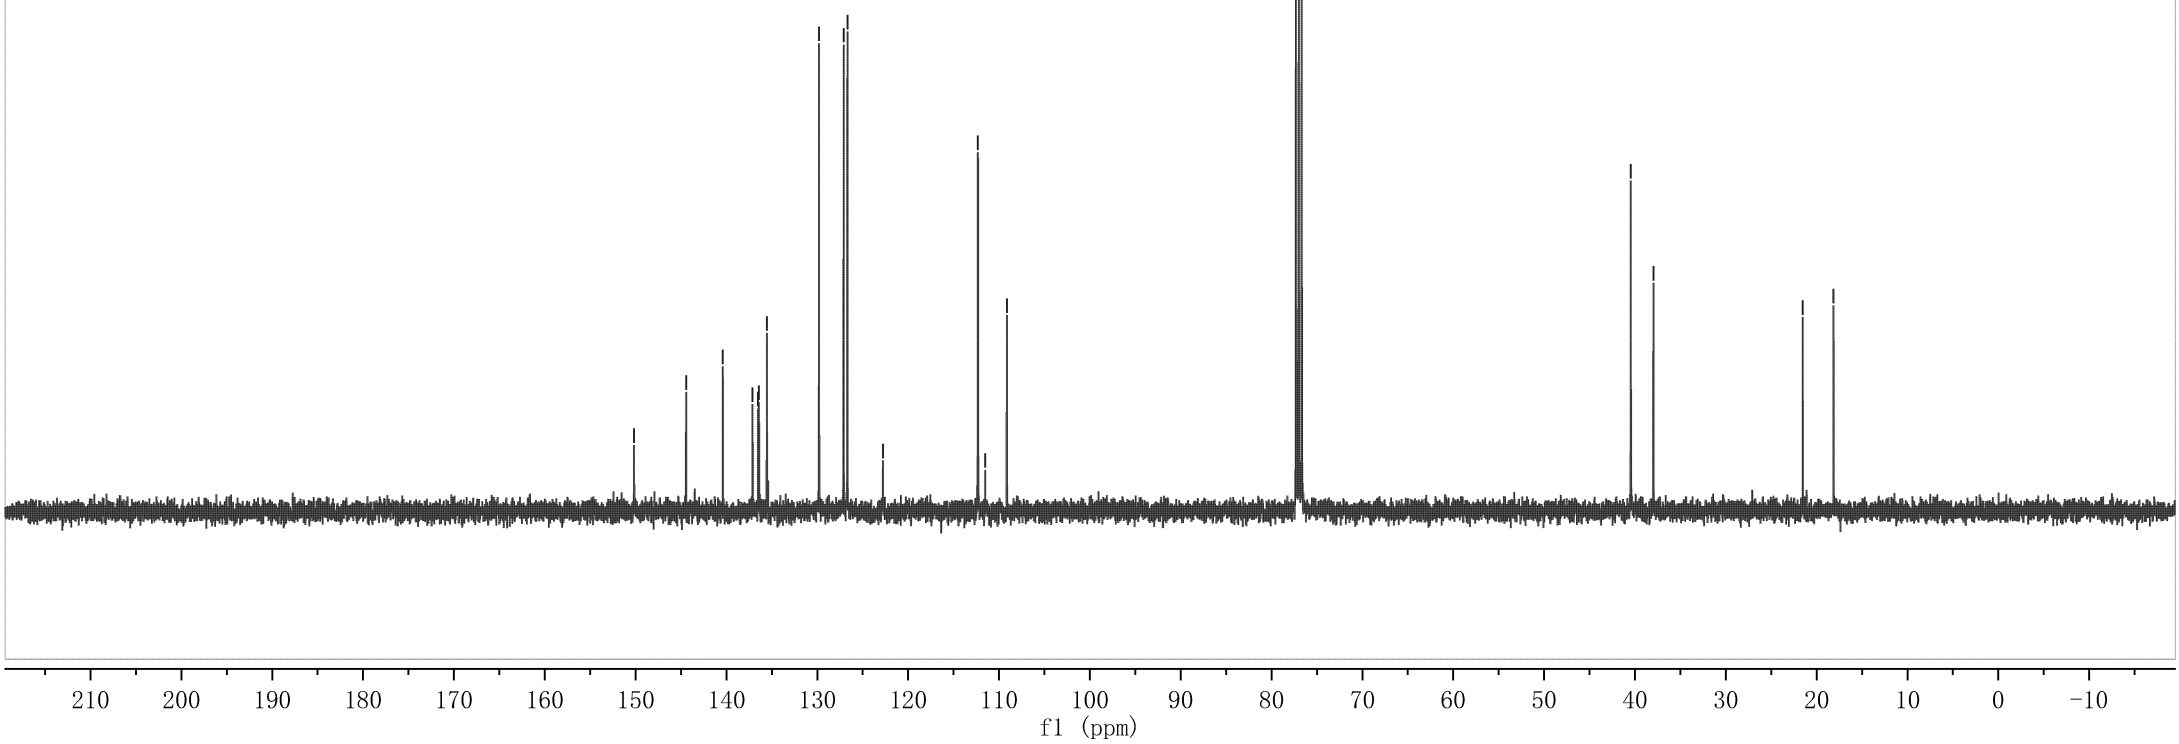

7.716  
7.696  
7.358  
7.341  
7.336  
7.223  
6.993  
6.922  
6.919  
6.894  
6.891  
6.775  
6.770  
6.752  
6.746  
6.746

3.291  
3.273  
3.255  
3.236  
2.969  
2.342  
2.021  
1.268  
1.249

| Parameter                | Value               |
|--------------------------|---------------------|
| 1 Title                  | ZXQ-20-69           |
| 2 Origin                 | Bruker BioSpin GmbH |
| 3 Solvent                | CDC13               |
| 4 Temperature            | 298.1               |
| 5 Number of Scans        | 7                   |
| 6 Acquisition Time       | 3.9846              |
| 7 Acquisition Date       | 2020-04-22T17:52:41 |
| 8 Spectrometer Frequency | 400.03              |
| 9 Spectral Width         | 8223.7              |

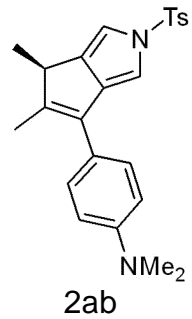

1.97  
1.97  
1.93  
1.92  
2.04

1.00  
5.92  
3.08  
3.07  
3.15

8.5 8.0 7.5 7.0 6.5 6.0 5.5 5.0 4.5 4.0 3.5 3.0 2.5 2.0 1.5 1.0 0.5 0.0 -0.5  
f1 (ppm)

| Parameter                | Value               |
|--------------------------|---------------------|
| 1 Title                  | ZXQ-20-69           |
| 2 Origin                 | Bruker BioSpin GmbH |
| 3 Solvent                | CDC13               |
| 4 Temperature            | 298.1               |
| 5 Number of Scans        | 7                   |
| 6 Acquisition Time       | 3.9846              |
| 7 Acquisition Date       | 2020-04-22T17:52:41 |
| 8 Spectrometer Frequency | 400.03              |
| 9 Spectral Width         | 8223.7              |

149.46  
145.75  
144.23  
139.59  
138.52  
136.52

130.35  
129.69  
128.83  
126.62  
123.44

112.28  
112.18  
107.50

77.32  
77.00  
76.68

41.94  
40.43

21.47  
17.17  
13.84

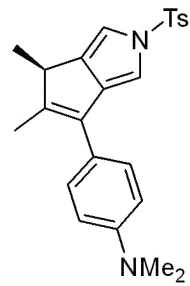

2ab

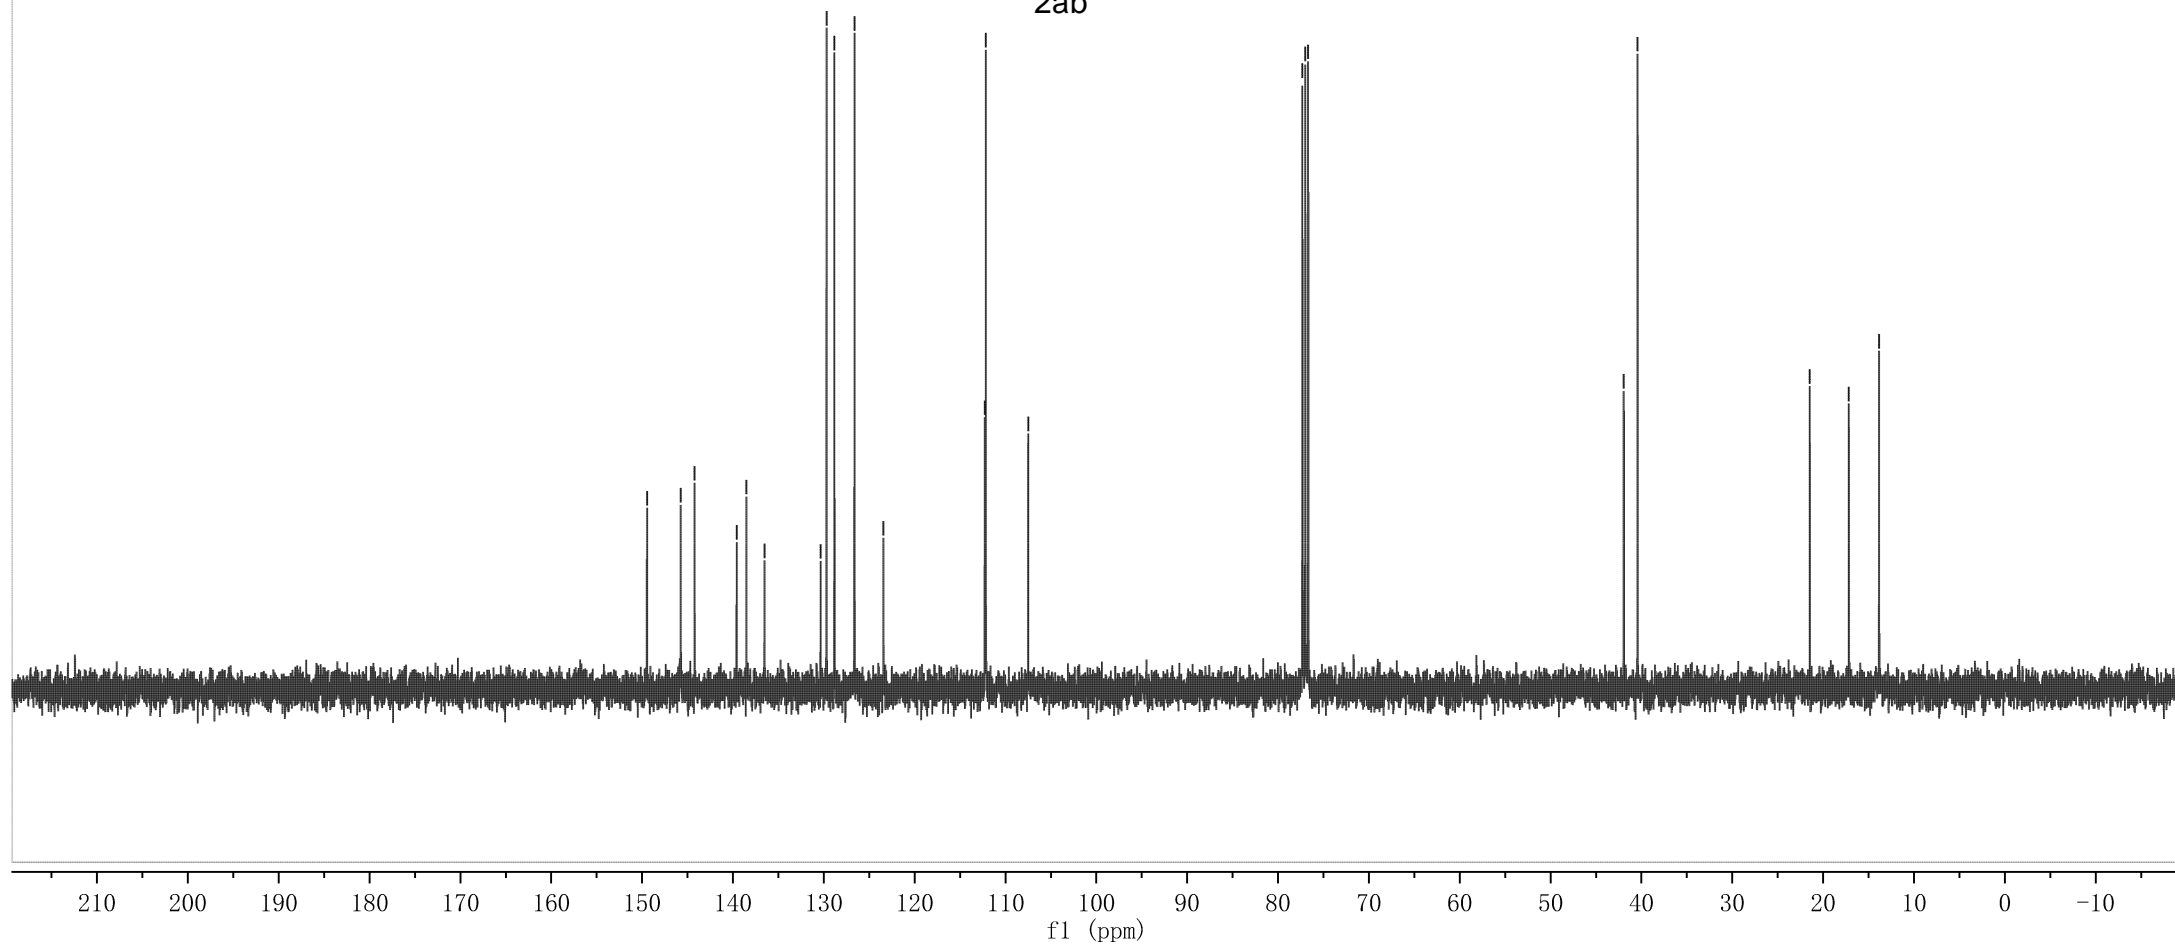

| Parameter                | Value               |
|--------------------------|---------------------|
| 1 Title                  | ZXQ-20-70           |
| 2 Origin                 | Bruker BioSpin GmbH |
| 3 Solvent                | CDCl3               |
| 4 Temperature            | 298.1               |
| 5 Number of Scans        | 15                  |
| 6 Acquisition Time       | 3.9846              |
| 7 Acquisition Date       | 2020-04-22T20:02:00 |
| 8 Spectrometer Frequency | 400.03              |
| 9 Spectral Width         | 8223.7              |

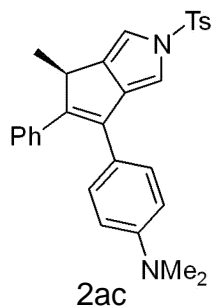

7.752  
7.731  
7.245  
7.229  
7.220  
7.207  
7.202  
7.198  
7.190  
7.058  
6.879  
6.819  
6.591

3.908  
3.892  
3.890  
3.873  
3.871  
3.855

2.927

2.355

1.146  
1.128

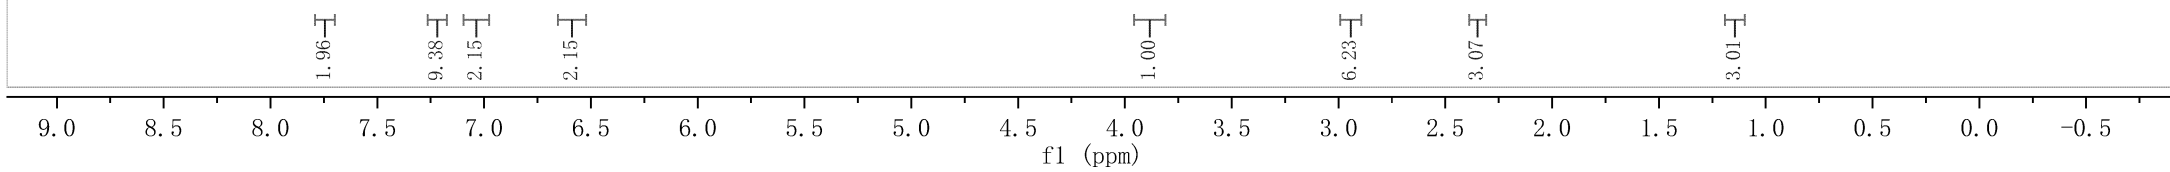



| Parameter                | Value               |
|--------------------------|---------------------|
| 1 Title                  | ZXQ-20-70-C         |
| 2 Origin                 | Bruker BioSpin GmbH |
| 3 Solvent                | CDC13               |
| 4 Temperature            | 298.6               |
| 5 Number of Scans        | 25                  |
| 6 Acquisition Time       | 1.3631              |
| 7 Acquisition Date       | 2020-04-22T20:05:15 |
| 8 Spectrometer Frequency | 100.59              |
| 9 Spectral Width         | 24038.5             |

149.52  
147.67  
144.43

139.42  
138.24  
136.85  
136.61

129.79  
129.36  
129.09  
128.16  
126.71  
122.86

112.45  
111.89  
109.07

77.32  
77.00  
76.68

40.90  
40.26

21.51  
17.59

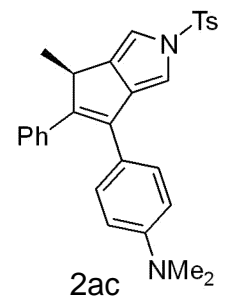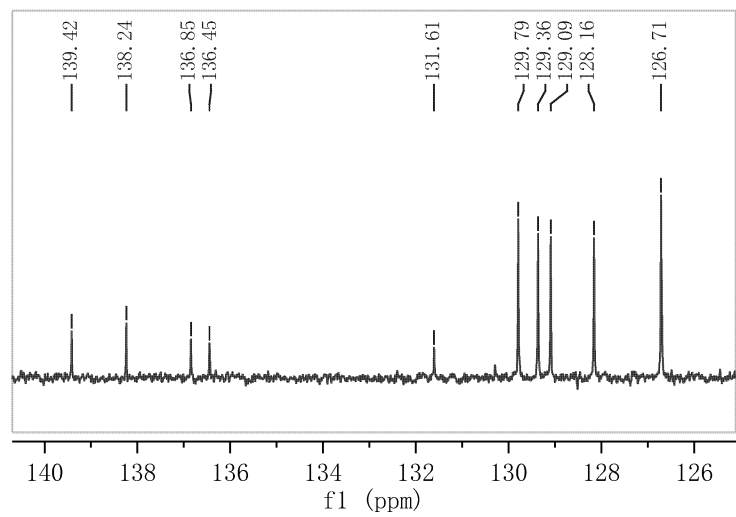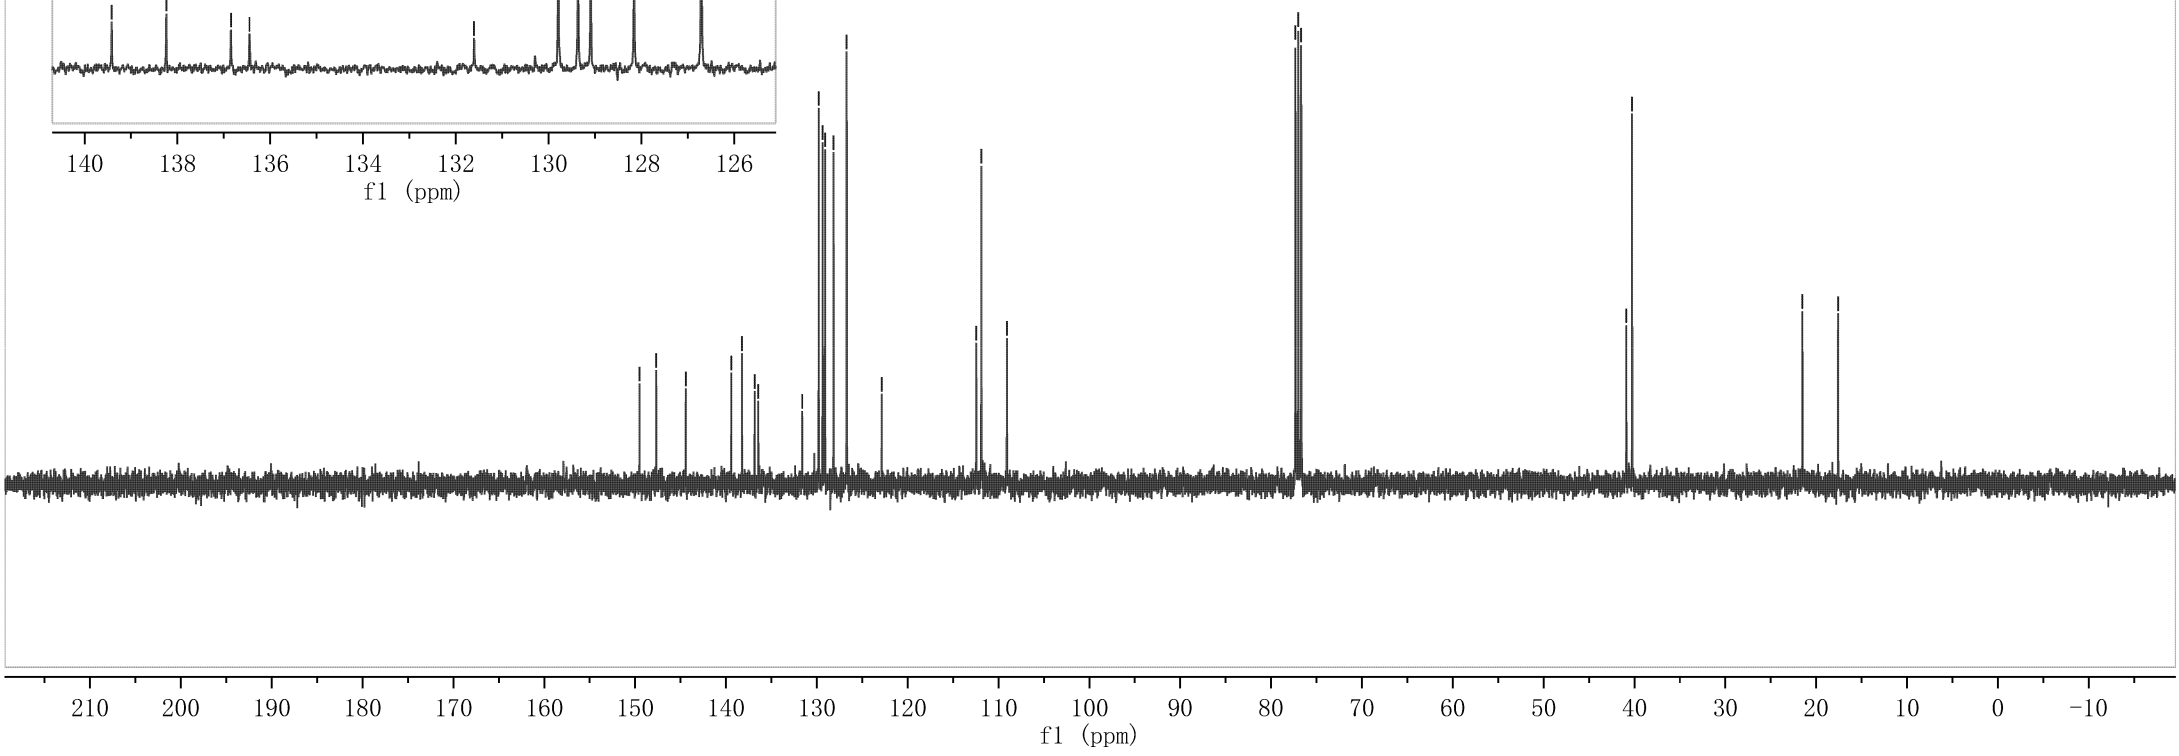

| Parameter                | Value               |
|--------------------------|---------------------|
| 1 Title                  | ZXQ-20-29           |
| 2 Origin                 | Bruker BioSpin GmbH |
| 3 Solvent                | CDC13               |
| 4 Temperature            | 298.3               |
| 5 Number of Scans        | 17                  |
| 6 Acquisition Time       | 3.9846              |
| 7 Acquisition Date       | 2020-04-14T10:50:31 |
| 8 Spectrometer Frequency | 400.03              |
| 9 Spectral Width         | 8223.7              |

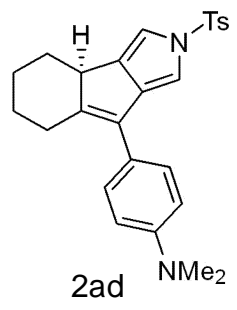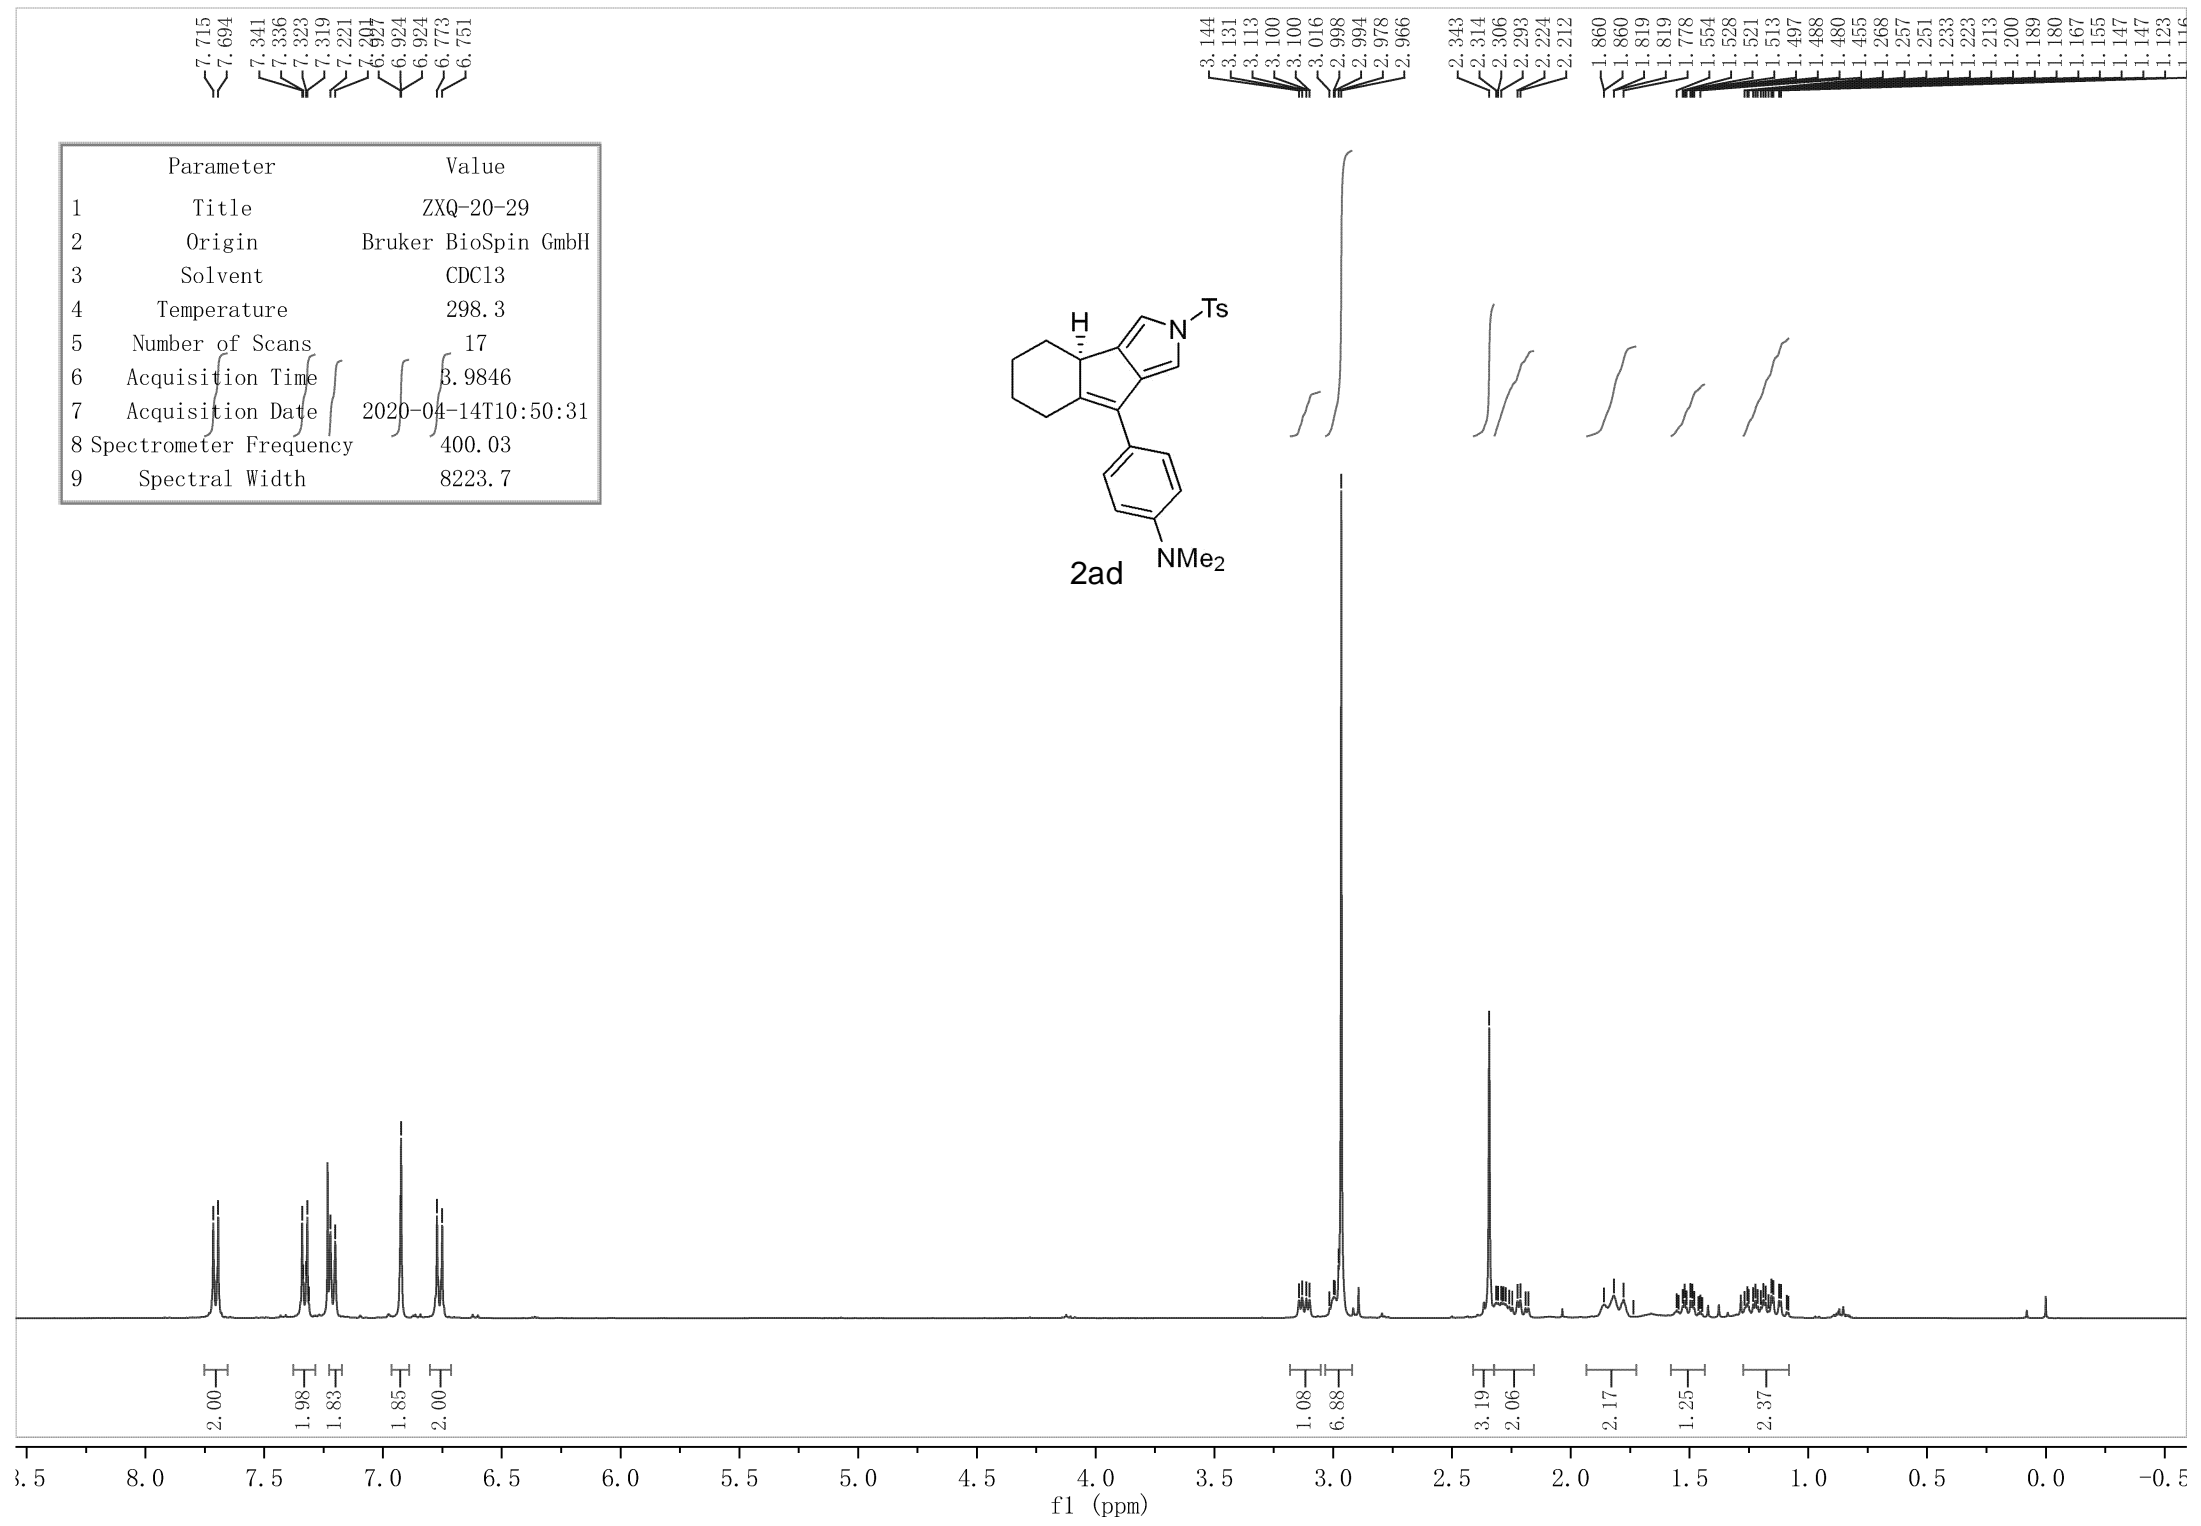

| Parameter                | Value               |
|--------------------------|---------------------|
| 1 Title                  | ZXQ-20-29-C         |
| 2 Origin                 | Bruker BioSpin GmbH |
| 3 Solvent                | CDC13               |
| 4 Temperature            | 298.7               |
| 5 Number of Scans        | 28                  |
| 6 Acquisition Time       | 1.3631              |
| 7 Acquisition Date       | 2020-04-14T10:53:41 |
| 8 Spectrometer Frequency | 100.59              |
| 9 Spectral Width         | 24038.5             |

149.54  
148.37  
144.22  
139.93  
137.20  
136.55  
129.69  
128.88  
127.89  
126.63  
123.18  
112.29  
112.26  
107.61  
77.32  
77.00  
76.68  
44.57  
40.46  
33.12  
27.72  
27.39  
25.51  
21.48

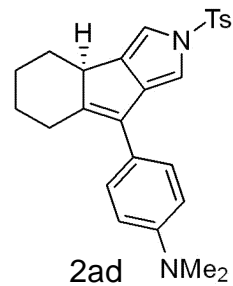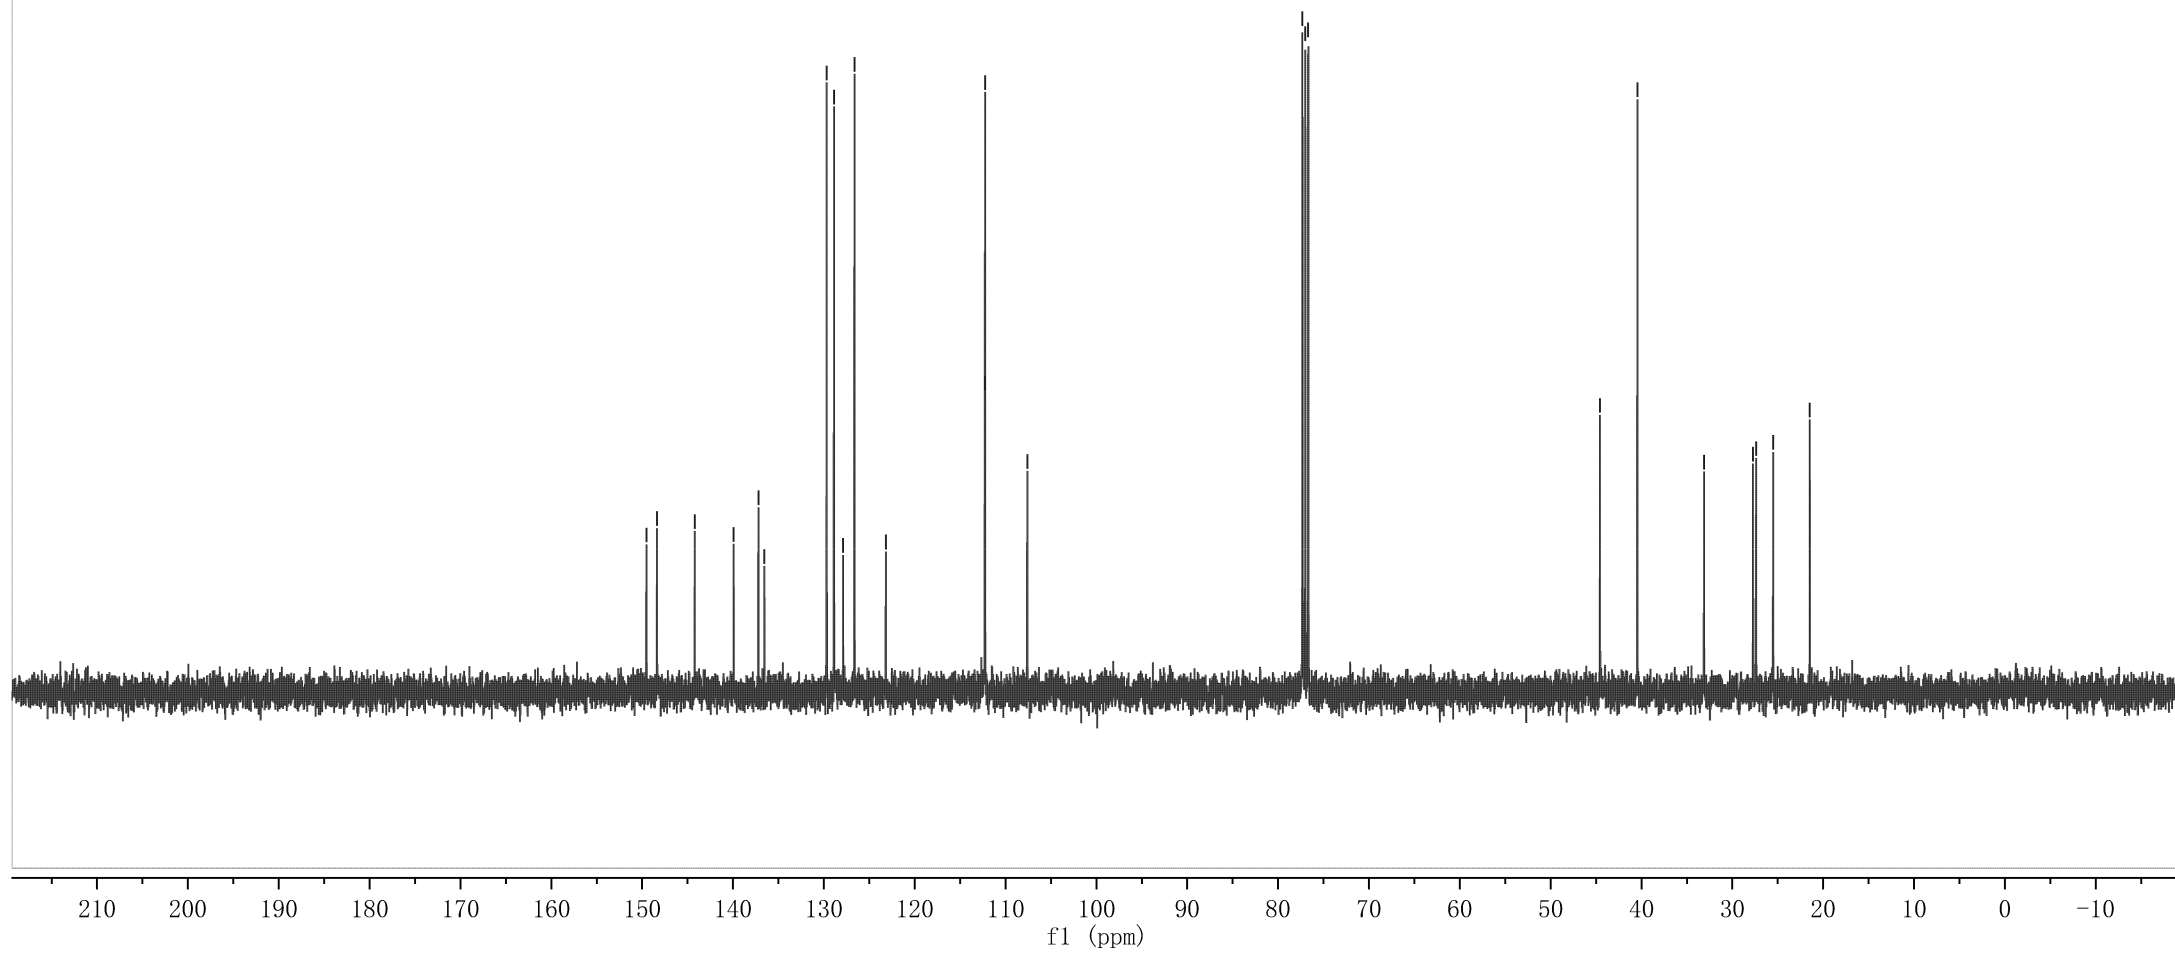

| Parameter                | Value               |
|--------------------------|---------------------|
| 1 Title                  | ZXQ-20-75           |
| 2 Origin                 | Bruker BioSpin GmbH |
| 3 Solvent                | CDC13               |
| 4 Temperature            | 298.1               |
| 5 Number of Scans        | 14                  |
| 6 Acquisition Time       | 3.9846              |
| 7 Acquisition Date       | 2020-04-22T15:45:34 |
| 8 Spectrometer Frequency | 400.03              |
| 9 Spectral Width         | 8223.7              |

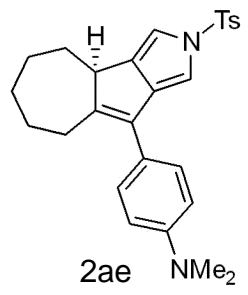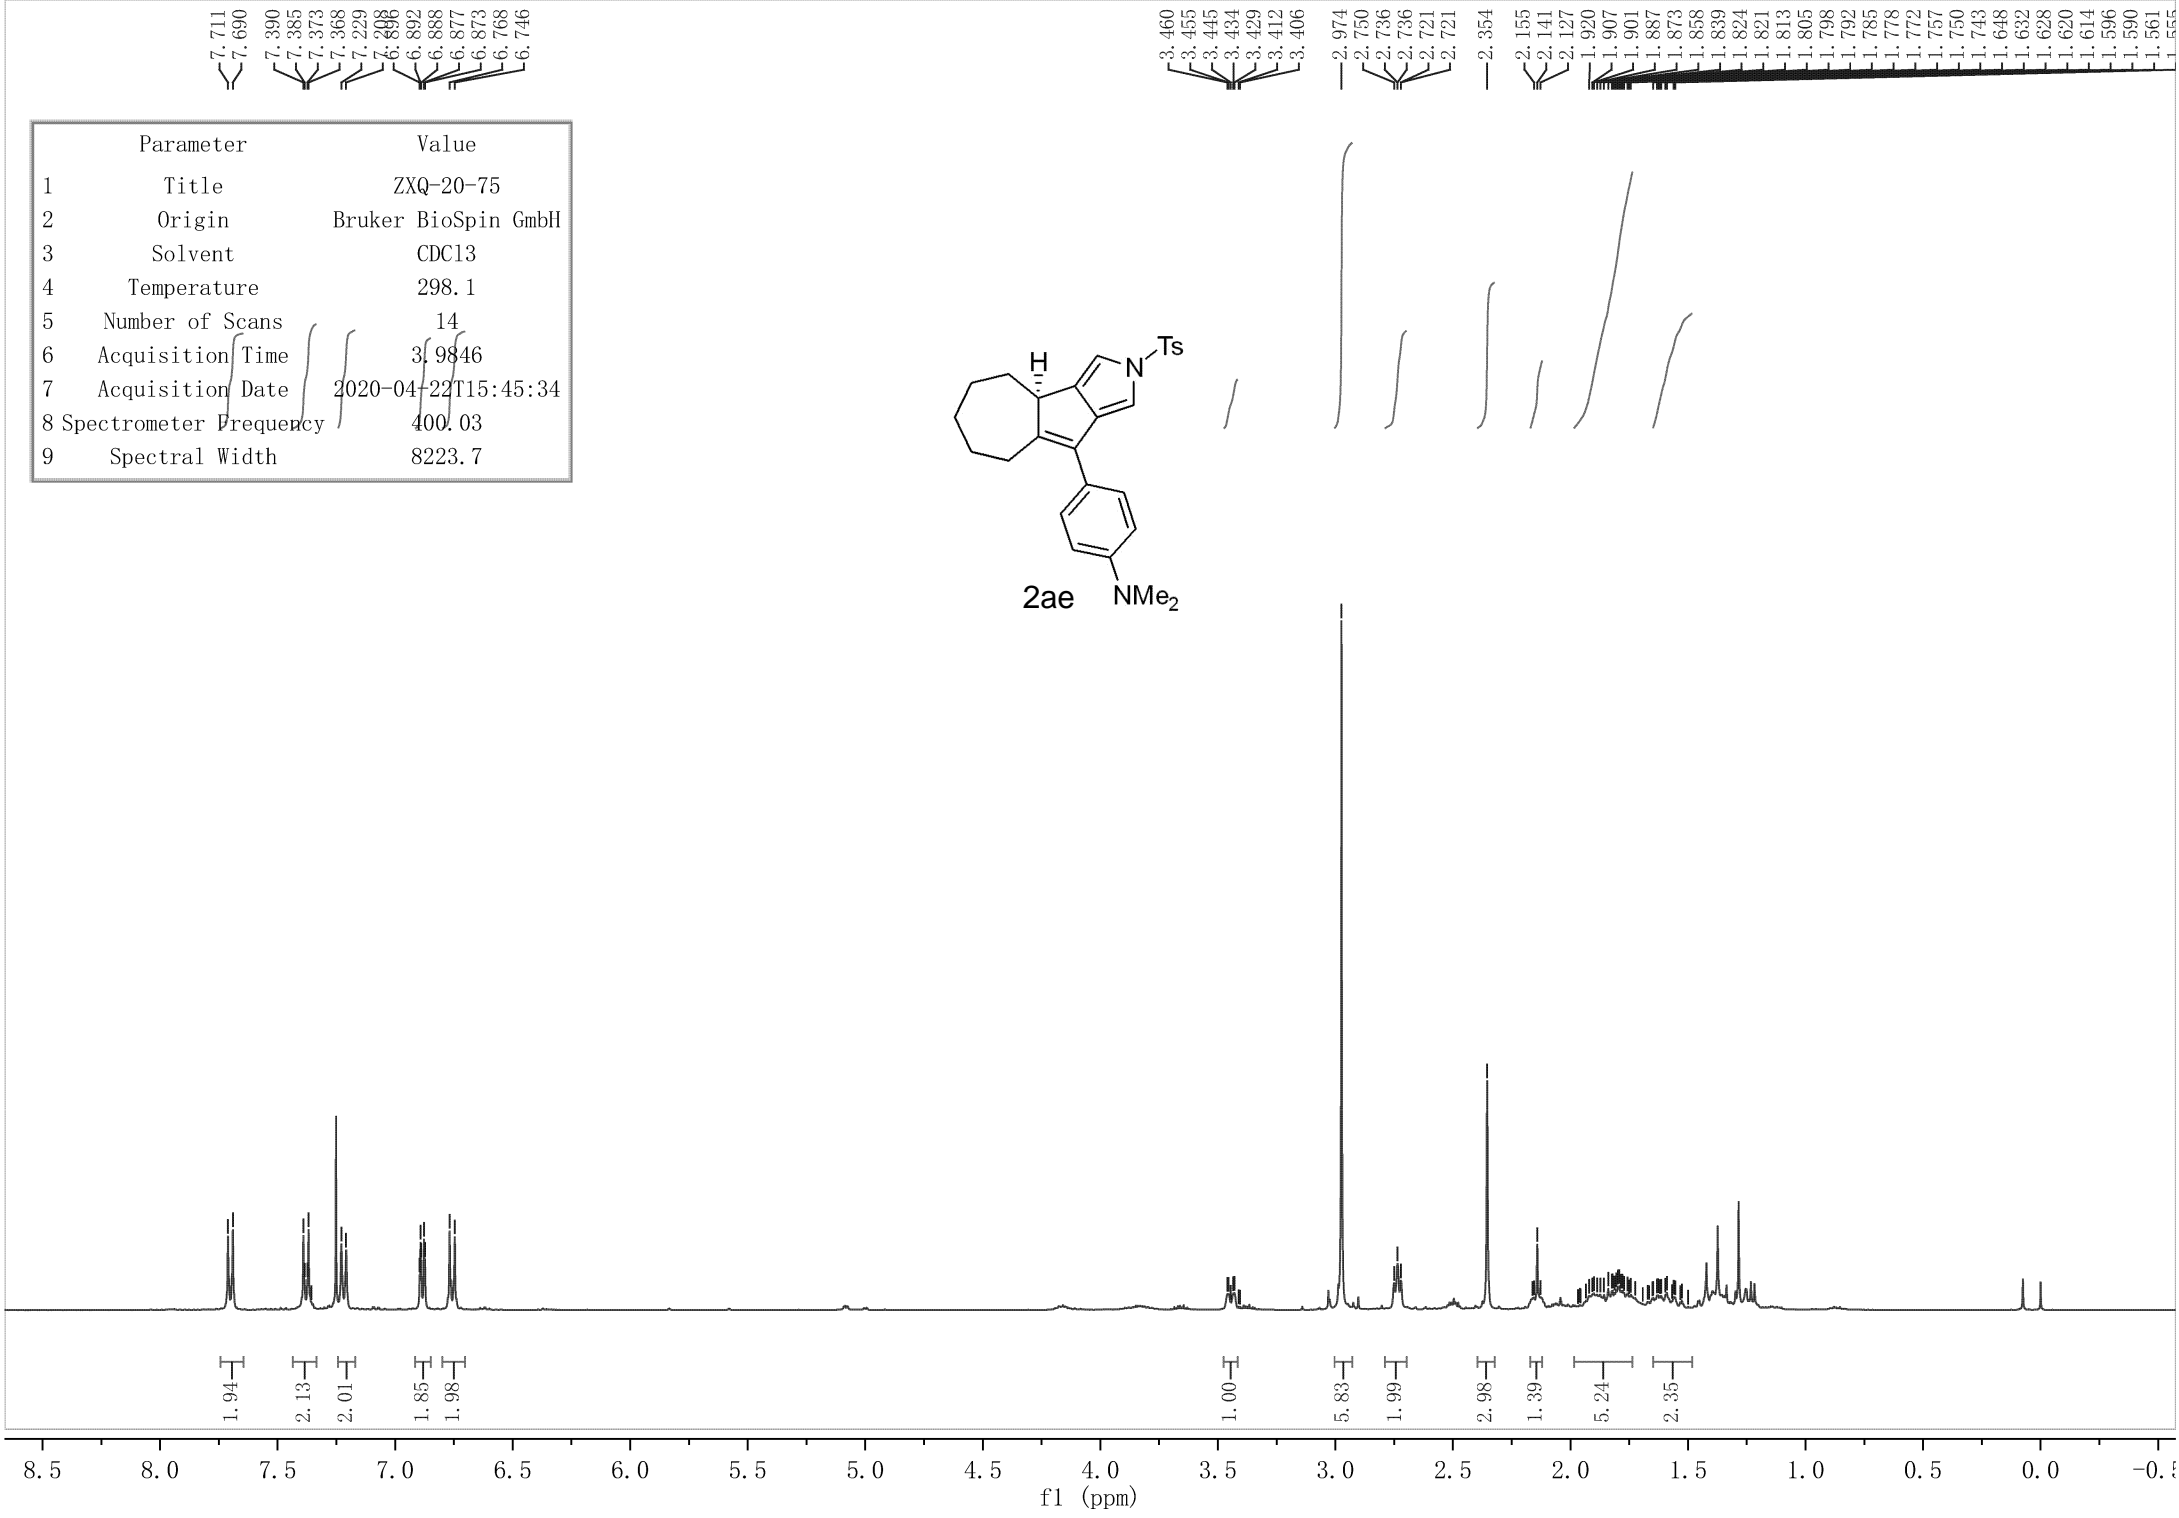

| Parameter                | Value               |
|--------------------------|---------------------|
| 1 Title                  | ZXQ-20-75-C         |
| 2 Origin                 | Bruker BioSpin GmbH |
| 3 Solvent                | CDC13               |
| 4 Temperature            | 298.5               |
| 5 Number of Scans        | 46                  |
| 6 Acquisition Time       | 1.3631              |
| 7 Acquisition Date       | 2020-04-22T15:48:38 |
| 8 Spectrometer Frequency | 100.59              |
| 9 Spectral Width         | 24038.5             |

151.12  
149.34  
144.20  
139.82  
138.29  
136.56  
129.79  
129.69  
128.73  
126.63  
123.85  
112.13  
107.42

77.32  
77.00  
76.68

47.45

40.44

34.16

30.62

29.37

27.05

21.49

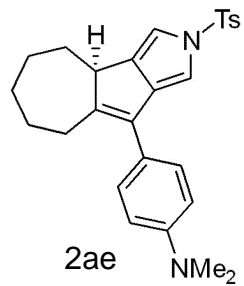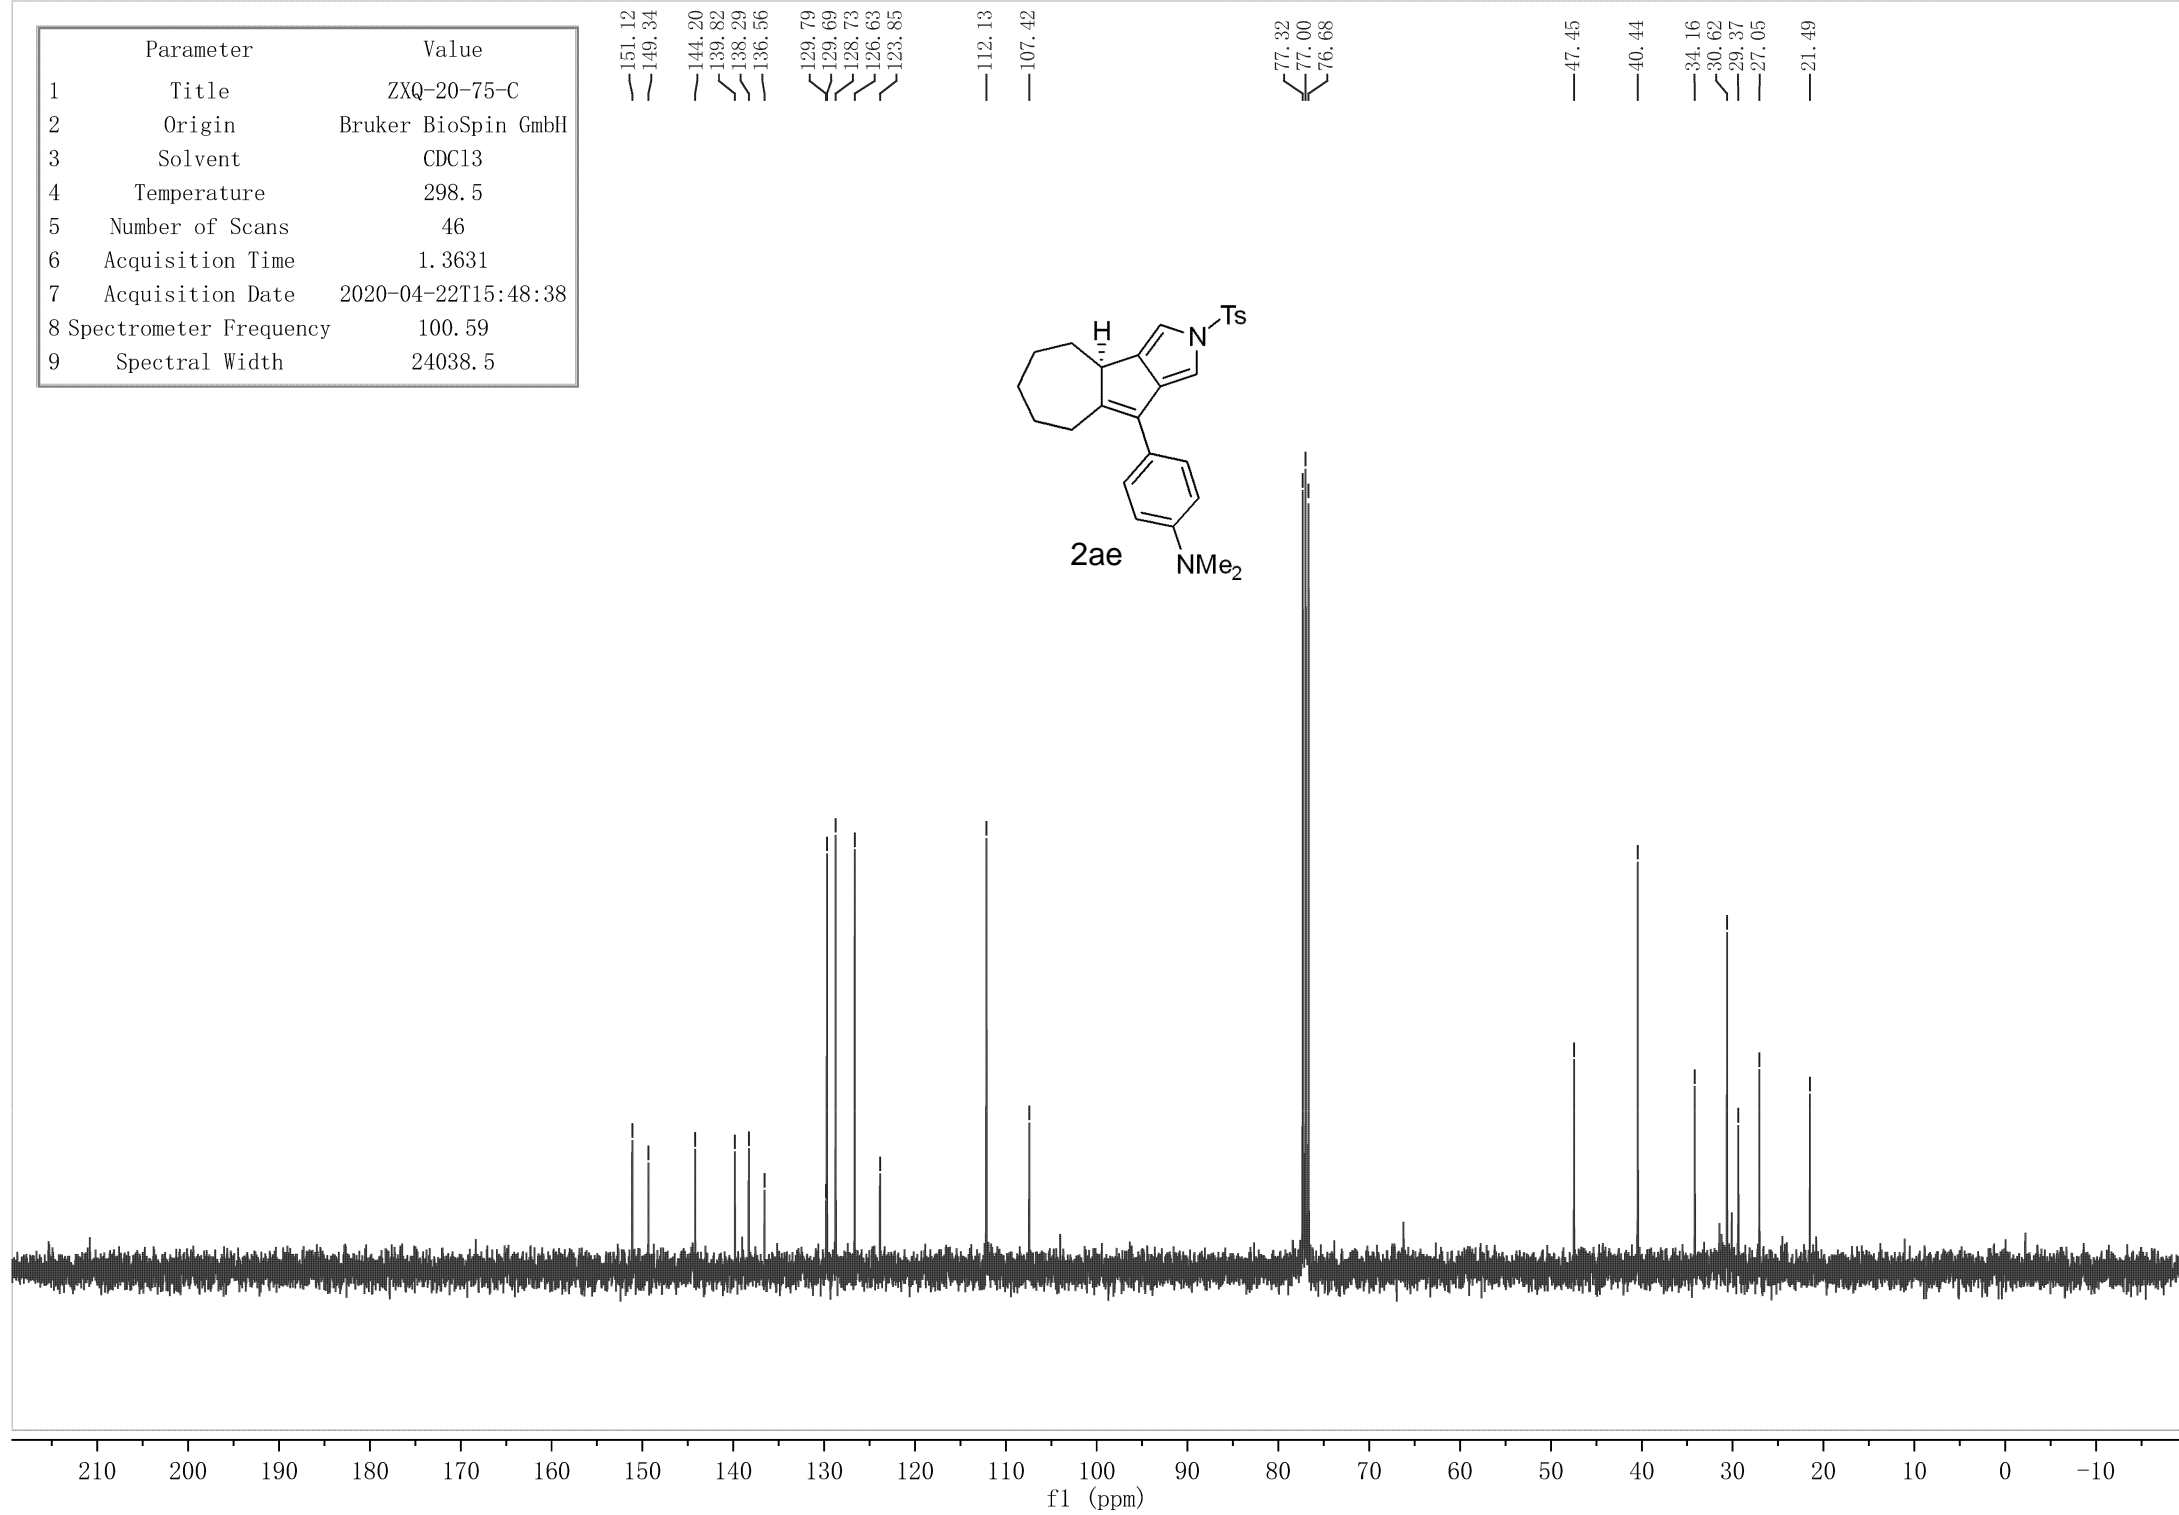

| Parameter                | Value               |
|--------------------------|---------------------|
| 1 Title                  | ZXQ-20-78           |
| 2 Origin                 | Bruker BioSpin GmbH |
| 3 Solvent                | CDC13               |
| 4 Temperature            | 298.2               |
| 5 Number of Scans        | 6                   |
| 6 Acquisition Time       | 3.9846              |
| 7 Acquisition Date       | 2020-04-23T11:49:32 |
| 8 Spectrometer Frequency | 400.03              |
| 9 Spectral Width         | 8223.7              |

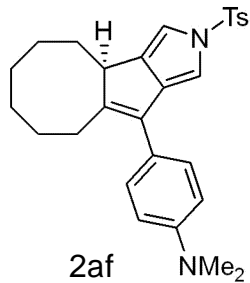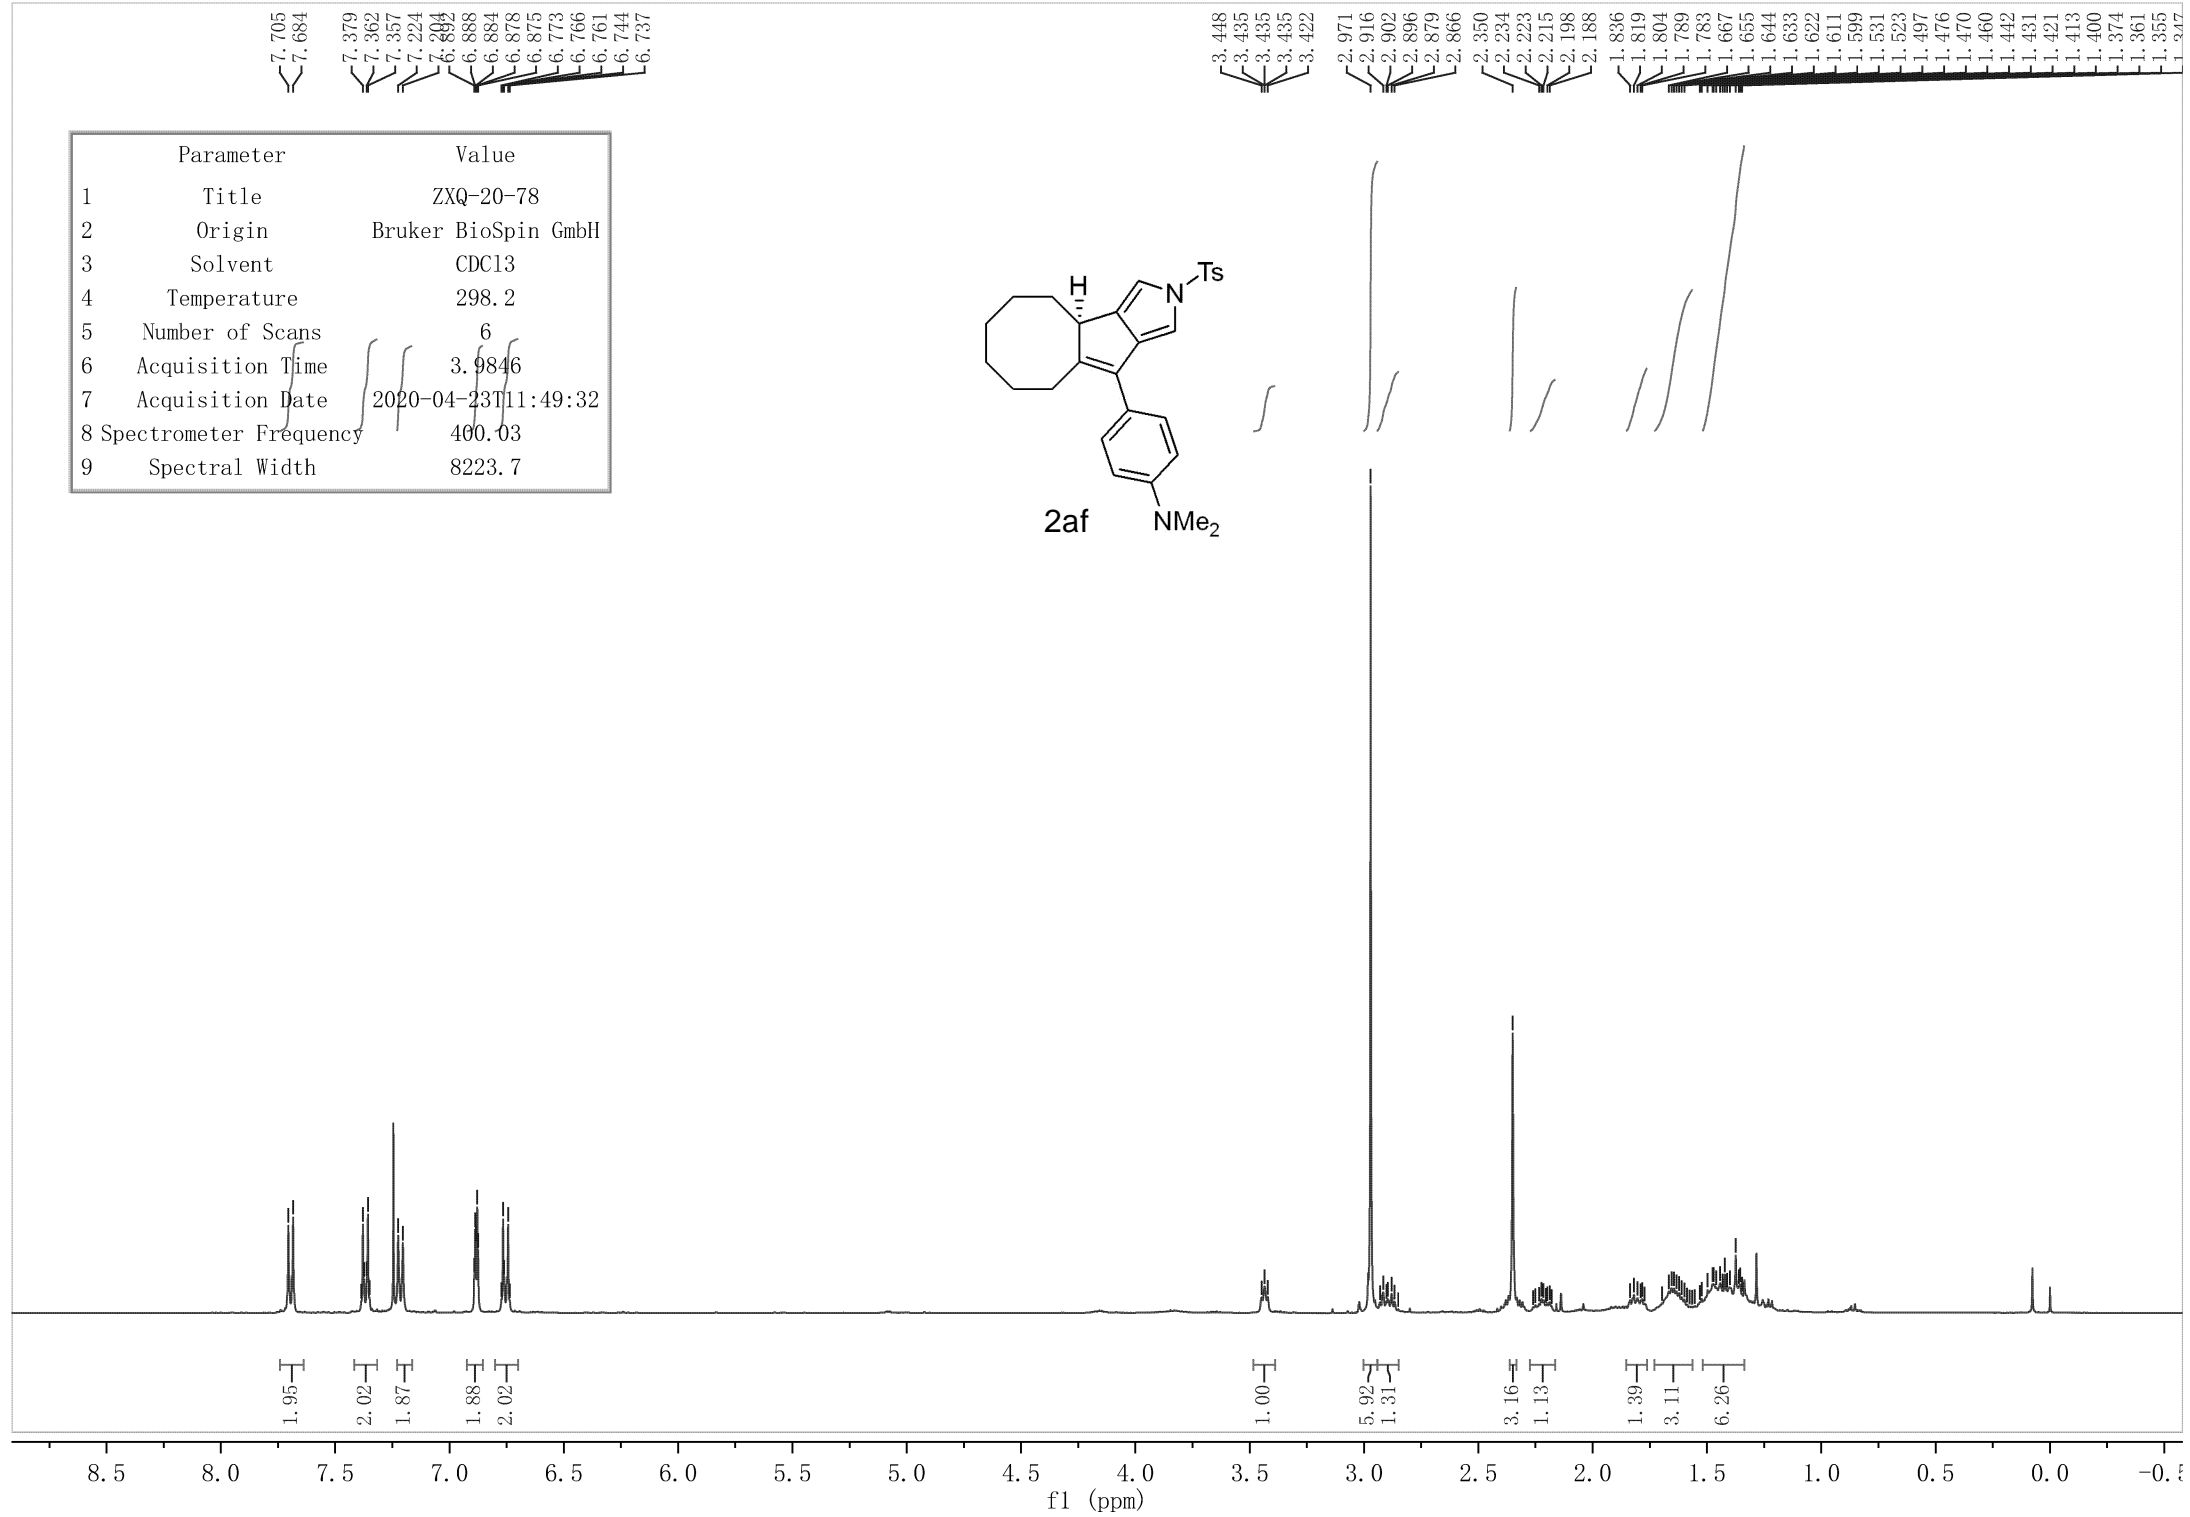

| Parameter                | Value               |
|--------------------------|---------------------|
| 1 Title                  | ZXQ-20-78-C         |
| 2 Origin                 | Bruker BioSpin GmbH |
| 3 Solvent                | CDC13               |
| 4 Temperature            | 298.5               |
| 5 Number of Scans        | 32                  |
| 6 Acquisition Time       | 1.3631              |
| 7 Acquisition Date       | 2020-04-23T11:51:55 |
| 8 Spectrometer Frequency | 100.59              |
| 9 Spectral Width         | 24038.5             |

150.30  
149.40  
144.18  
140.36  
137.03  
136.56  
131.59  
129.65  
128.48  
126.57  
123.98

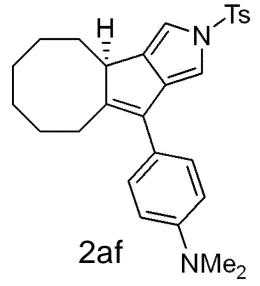

112.22  
107.67

77.32  
77.00  
76.68

46.92

40.42

28.58  
28.44  
27.68  
26.72  
25.66  
24.40  
21.49

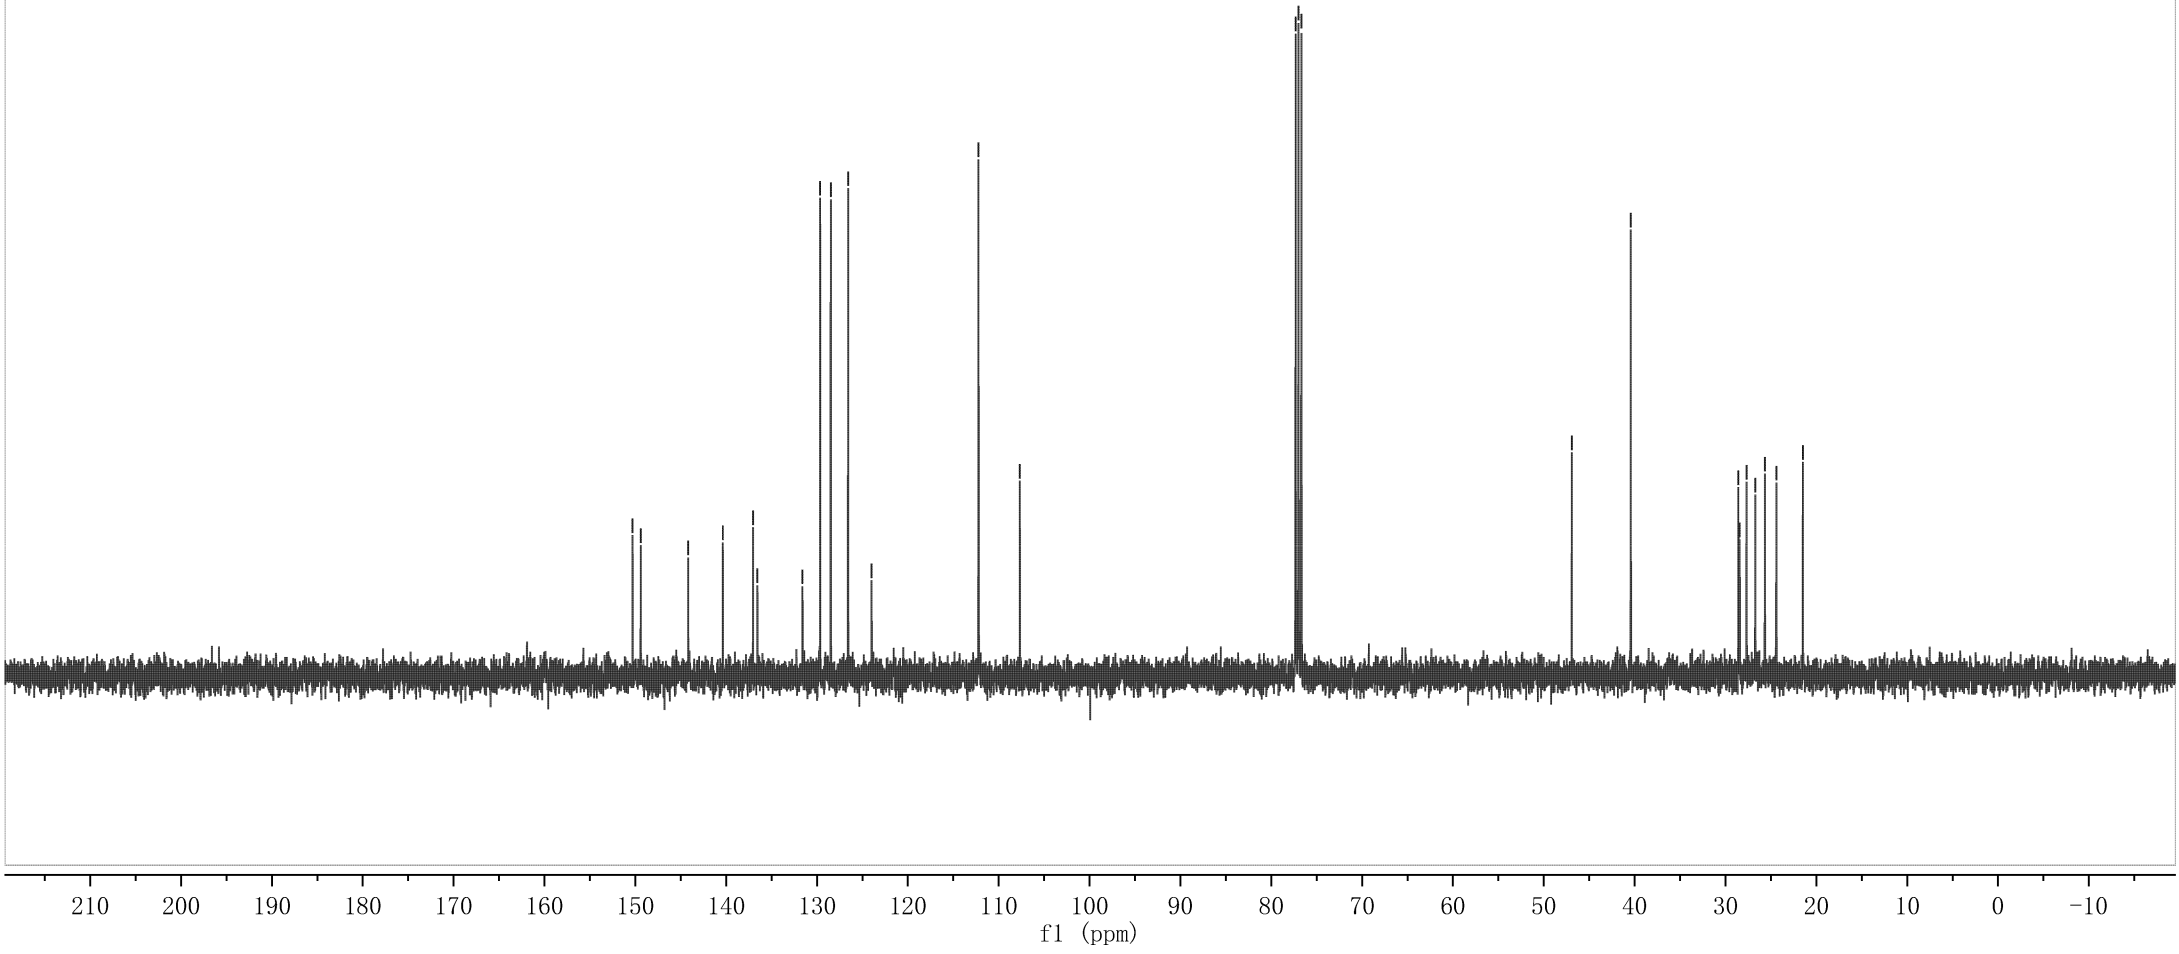

7.754  
7.734  
7.712  
7.696  
7.561  
7.541  
7.247  
7.229  
7.132  
7.111  
7.103  
7.074  
7.036  
7.010  
6.979  
6.802  
6.781

4.332  
4.310  
4.289

3.254  
3.233  
3.217  
3.196  
3.002  
2.738  
2.715  
2.702  
2.679  
2.353

| Parameter                | Value               |
|--------------------------|---------------------|
| 1 Title                  | ZXQ-20-31           |
| 2 Origin                 | Bruker BioSpin GmbH |
| 3 Solvent                | CDCl3               |
| 4 Temperature            | 298.4               |
| 5 Number of Scans        | 16                  |
| 6 Acquisition Time       | 3.9846              |
| 7 Acquisition Date       | 2020-04-14T10:58:54 |
| 8 Spectrometer Frequency | 400.03              |
| 9 Spectral Width         | 8223.7              |

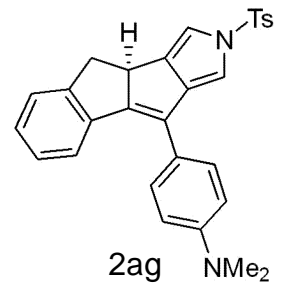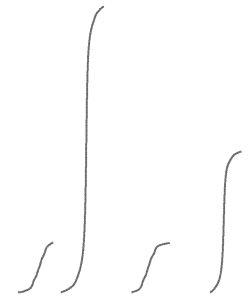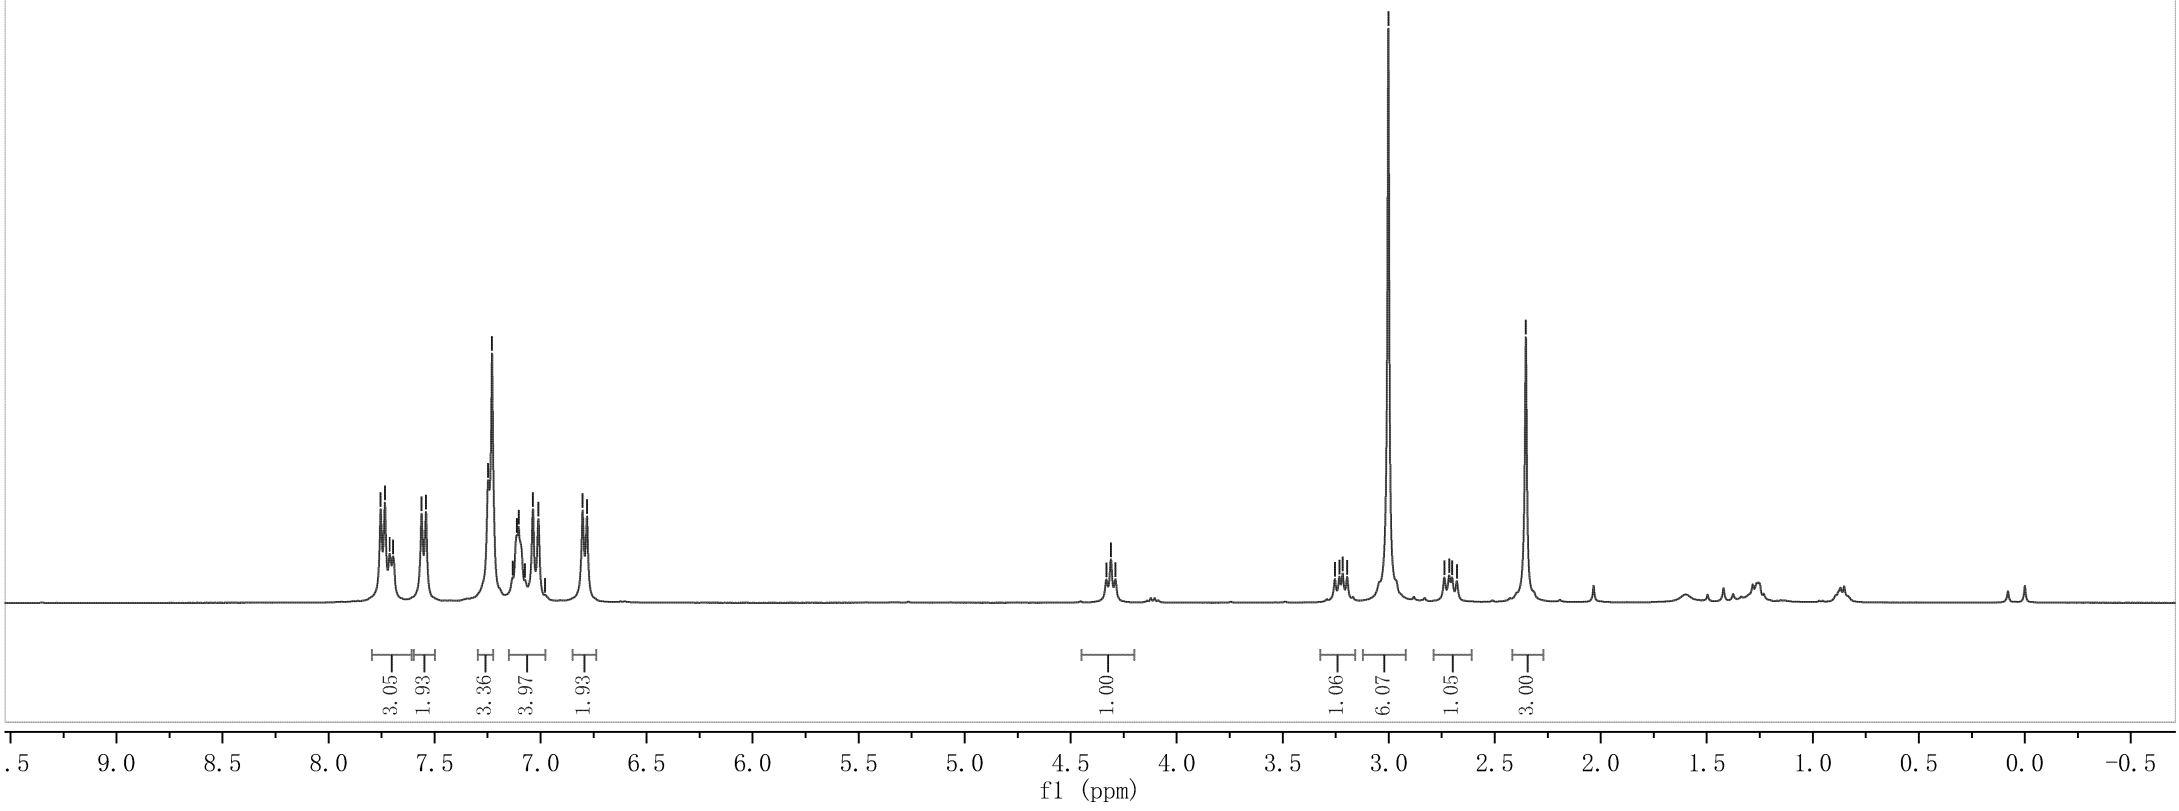



| Parameter                | Value               |
|--------------------------|---------------------|
| 1 Title                  | ZXQ-20-31-C         |
| 2 Origin                 | Bruker BioSpin GmbH |
| 3 Solvent                | CDC13               |
| 4 Temperature            | 298.6               |
| 5 Number of Scans        | 46                  |
| 6 Acquisition Time       | 1.3631              |
| 7 Acquisition Date       | 2020-04-14T11:01:13 |
| 8 Spectrometer Frequency | 100.59              |
| 9 Spectral Width         | 24038.5             |

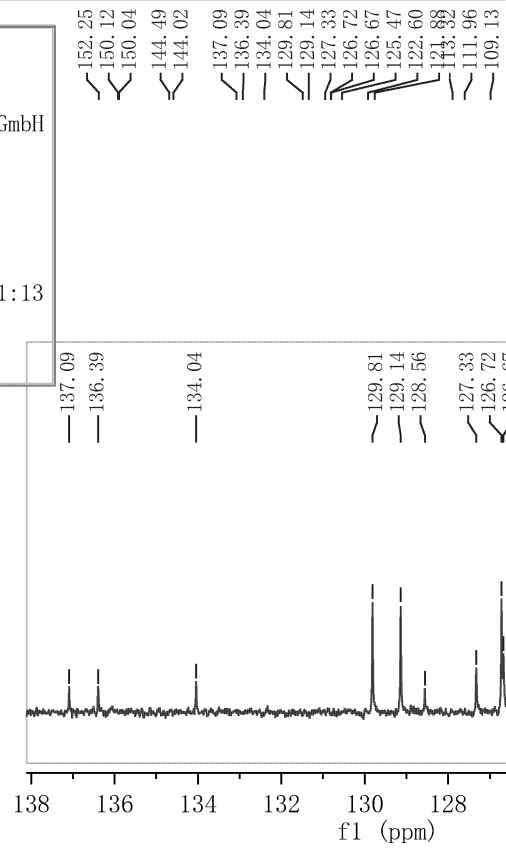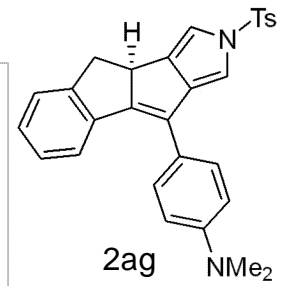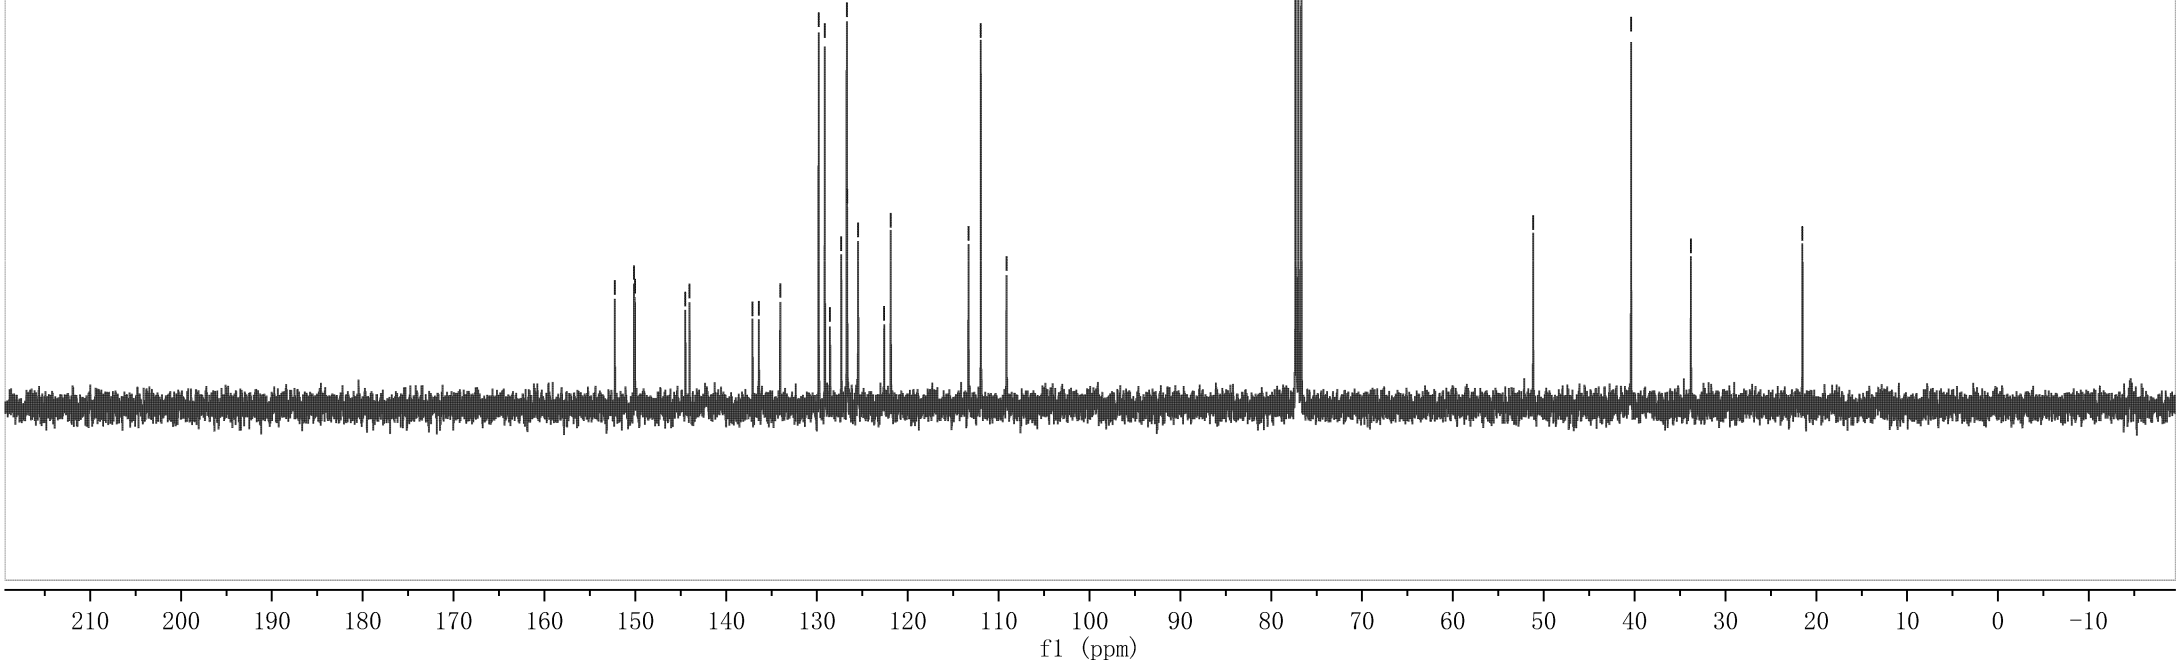

| Parameter                | Value               |
|--------------------------|---------------------|
| 1 Title                  | ZXQ-21-106          |
| 2 Origin                 | Bruker BioSpin GmbH |
| 3 Solvent                | CDC13               |
| 4 Temperature            | 300.9               |
| 5 Number of Scans        | 10                  |
| 6 Acquisition Time       | 3.9846              |
| 7 Acquisition Date       | 2020-07-03T22:13:23 |
| 8 Spectrometer Frequency | 400.03              |
| 9 Spectral Width         | 8223.7              |

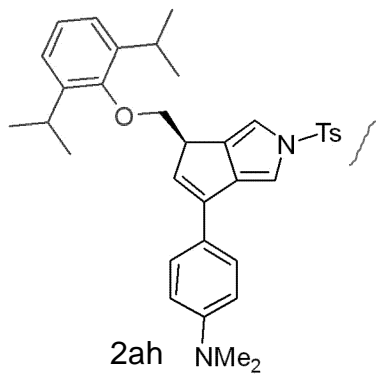

7.776  
7.755  
7.549  
7.527  
7.271  
7.265  
7.262  
7.251  
7.087  
6.745  
6.487  
6.481

4.021  
4.003  
3.985  
3.792  
3.771  
3.753  
3.739  
3.718  
3.697  
3.323  
3.305  
3.288  
2.953

2.377

1.219  
1.203  
1.186

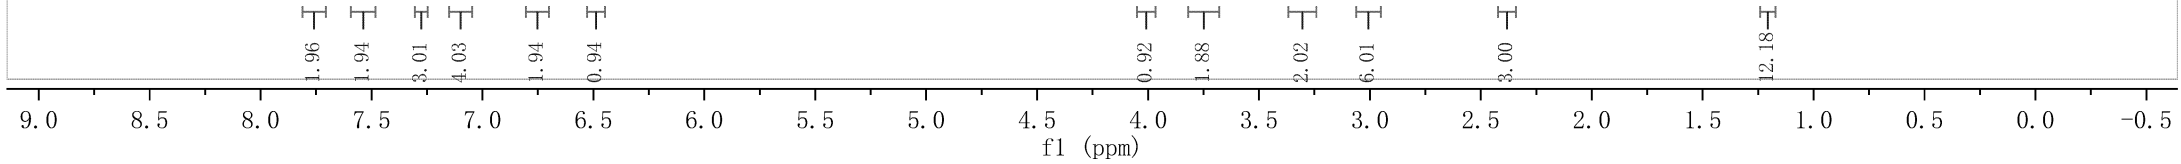

| Parameter                | Value               |
|--------------------------|---------------------|
| 1 Title                  | ZXQ-21-106-C        |
| 2 Origin                 | Bruker BioSpin GmbH |
| 3 Solvent                | CDC13               |
| 4 Temperature            | 301.0               |
| 5 Number of Scans        | 98                  |
| 6 Acquisition Time       | 1.3631              |
| 7 Acquisition Date       | 2020-07-03T22:16:31 |
| 8 Spectrometer Frequency | 100.59              |
| 9 Spectral Width         | 24038.5             |

153.05  
150.40  
144.59  
141.76  
138.94  
137.08  
136.54  
135.66  
129.89  
129.14  
127.26  
126.74  
124.62  
123.94  
122.43  
113.60  
112.26  
109.49  
77.32  
77.00  
76.68  
75.55  
44.71  
40.39  
26.52  
24.06  
23.90  
21.53

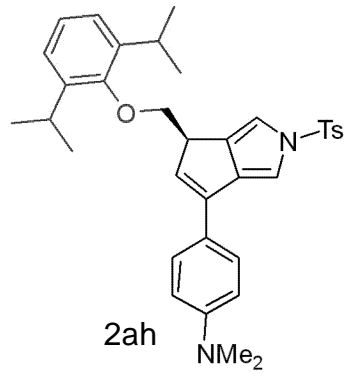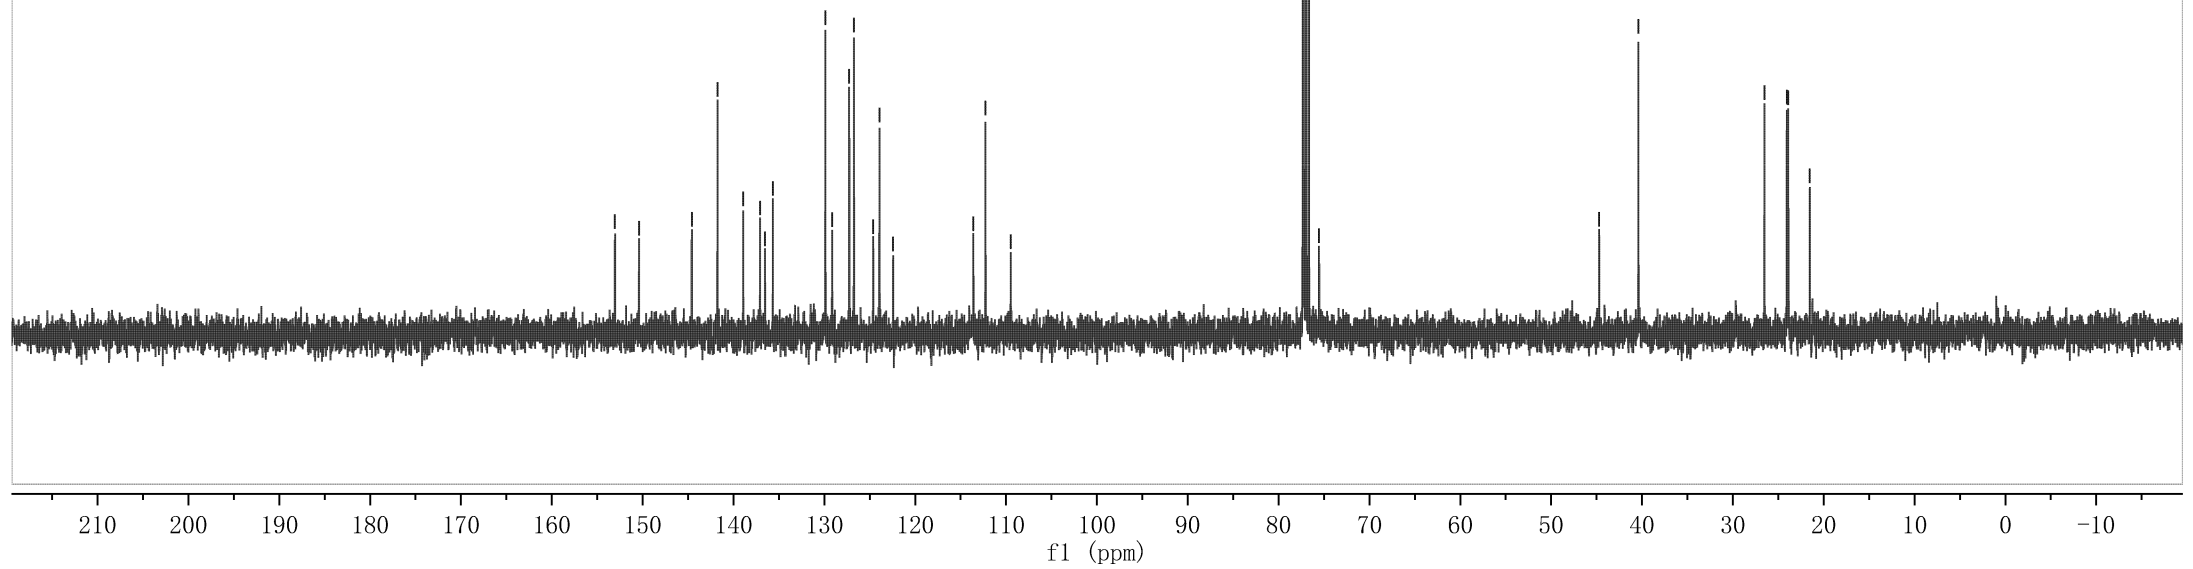

| Parameter                | Value               |
|--------------------------|---------------------|
| 1 Title                  | ZXQ-21-106-C-DEPT   |
| 2 Origin                 | Bruker BioSpin GmbH |
| 3 Solvent                | CDC13               |
| 4 Temperature            | 301.5               |
| 5 Number of Scans        | 19                  |
| 6 Acquisition Time       | 1.3631              |
| 7 Acquisition Date       | 2020-07-03T22:22:47 |
| 8 Spectrometer Frequency | 100.59              |
| 9 Spectral Width         | 24038.5             |

129.89  
129.14  
127.26  
126.74  
124.62  
123.94

113.60  
112.26  
109.49

75.55

44.71  
40.39

26.52  
24.06  
23.90  
21.53

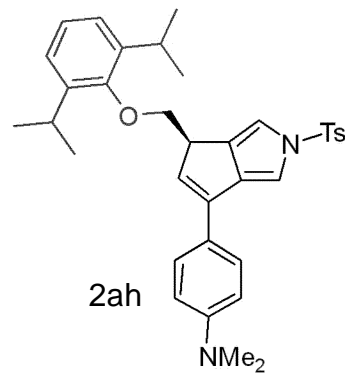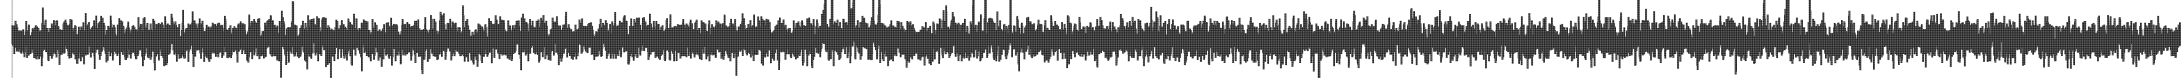

210 200 190 180 170 160 150 140 130 120 110 100 90 80 70 60 50 40 30 20 10 0 -10

f1 (ppm)

| Parameter                | Value               |
|--------------------------|---------------------|
| 1 Title                  | ZXQ-20-189-3        |
| 2 Origin                 | Bruker BioSpin GmbH |
| 3 Solvent                | CDC13               |
| 4 Temperature            | 298.9               |
| 5 Number of Scans        | 10                  |
| 6 Acquisition Time       | 3.9846              |
| 7 Acquisition Date       | 2020-05-19T17:07:50 |
| 8 Spectrometer Frequency | 400.03              |
| 9 Spectral Width         | 8223.7              |

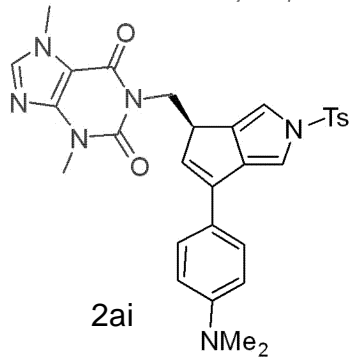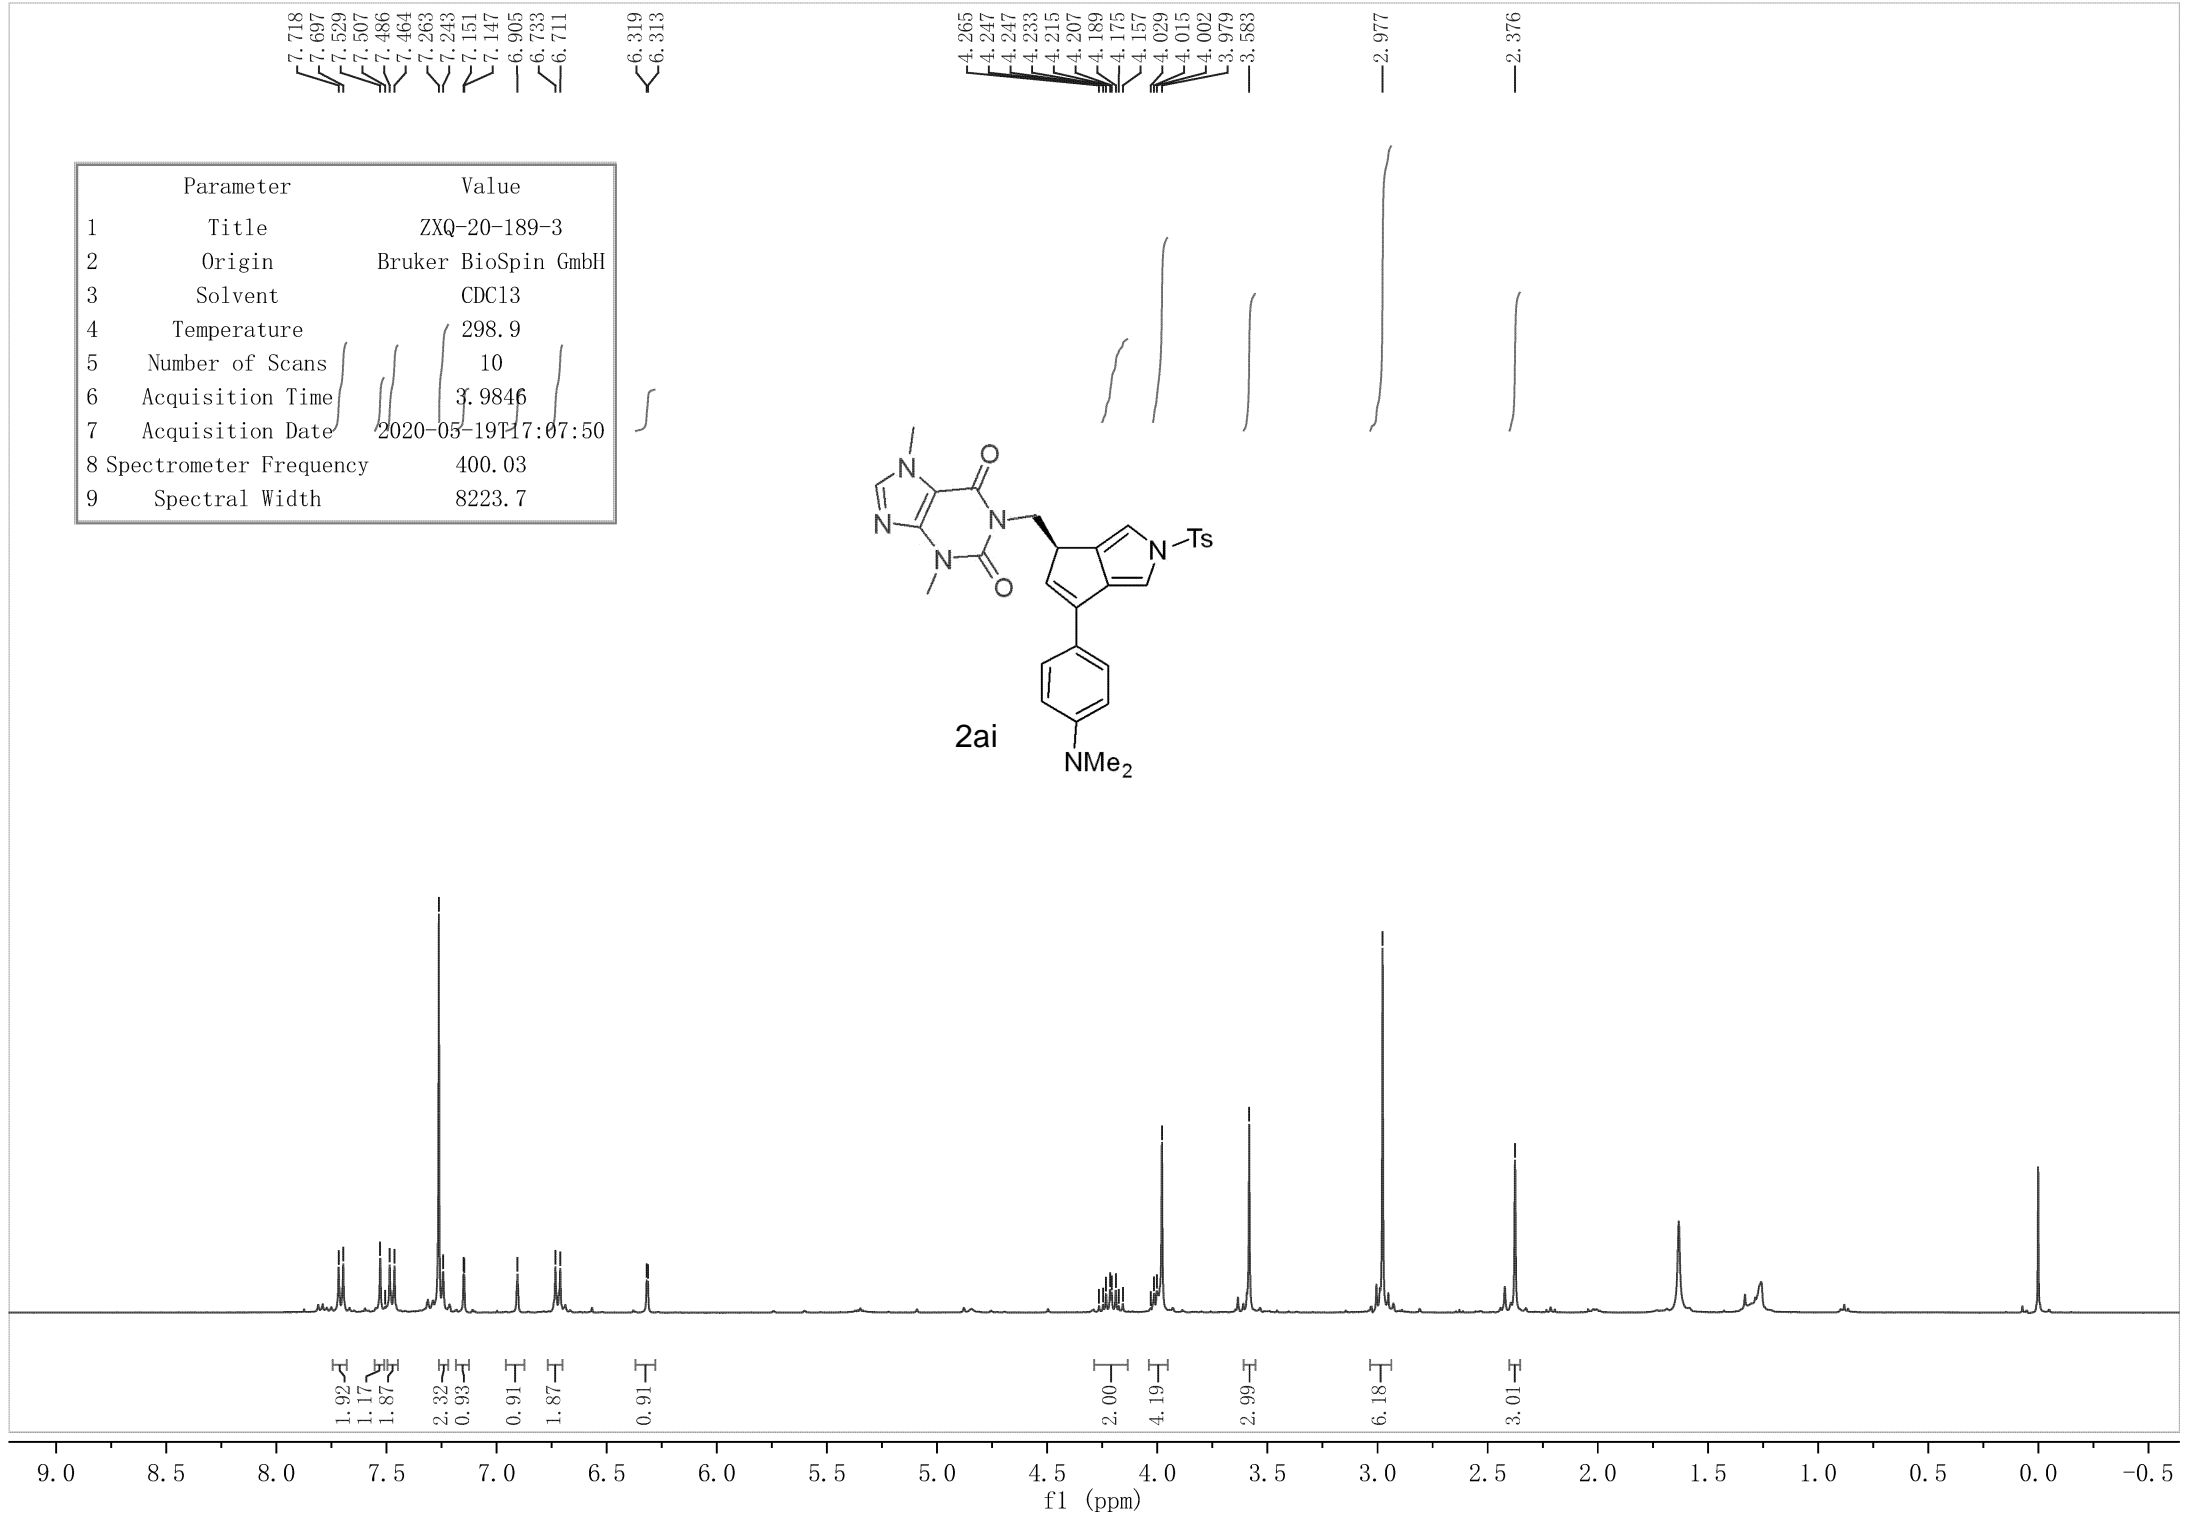

| Parameter                | Value               |
|--------------------------|---------------------|
| 1 Title                  | ZXQ-20-189-4-C      |
| 2 Origin                 | Bruker BioSpin GmbH |
| 3 Solvent                | CDC13               |
| 4 Temperature            | 300.0               |
| 5 Number of Scans        | 891                 |
| 6 Acquisition Time       | 1.3631              |
| 7 Acquisition Date       | 2020-05-19T21:43:31 |
| 8 Spectrometer Frequency | 100.59              |
| 9 Spectral Width         | 24038.5             |

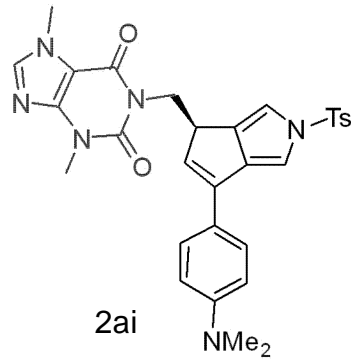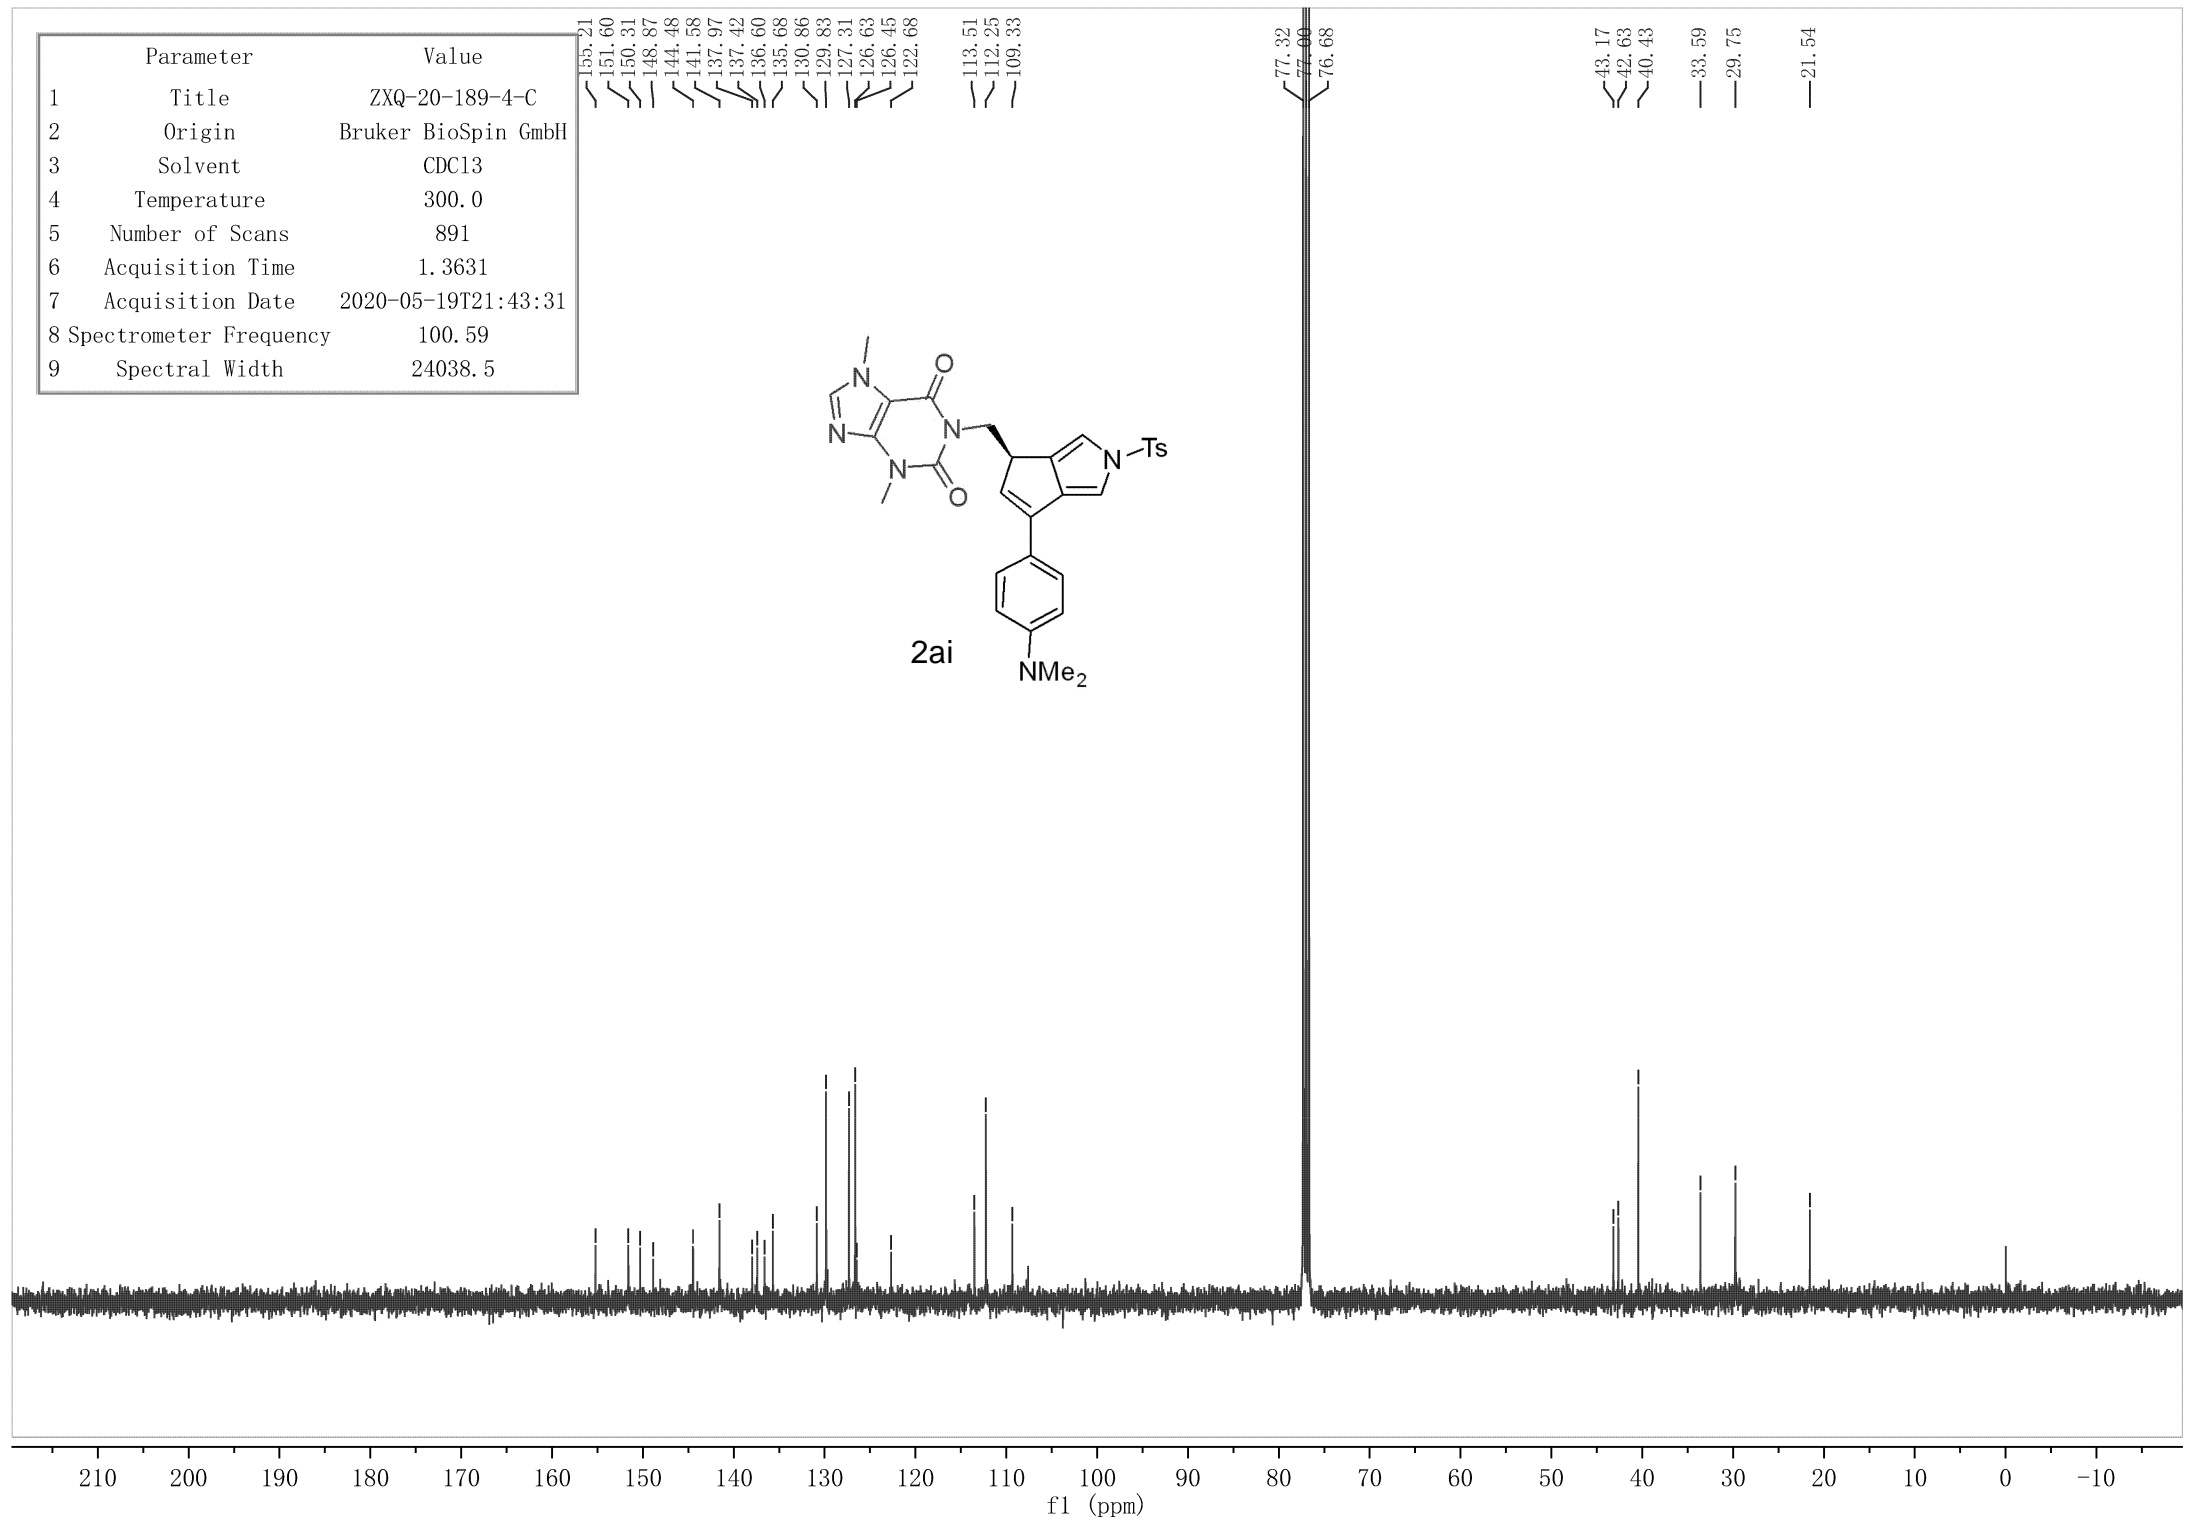

| Parameter                | Value               |
|--------------------------|---------------------|
| 1 Title                  | ZXQ-19-157-2        |
| 2 Origin                 | Bruker BioSpin GmbH |
| 3 Solvent                | CDCl3               |
| 4 Temperature            | 298.0               |
| 5 Number of Scans        | 16                  |
| 6 Acquisition Time       | 4.0894              |
| 7 Acquisition Date       | 2019-12-25T16:37:41 |
| 8 Spectrometer Frequency | 400.13              |
| 9 Spectral Width         | 8012.8              |

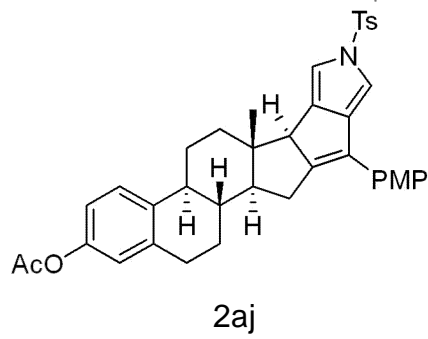

7.746  
7.726  
7.518  
7.496  
7.297  
7.275  
7.261  
7.251  
7.242  
7.214  
7.212  
7.105  
6.980  
6.961  
6.940  
6.857  
6.852  
6.836  
6.831  
6.831  
6.783

3.837

3.465  
3.422  
3.422  
3.382

2.944  
2.926  
2.902  
2.863  
2.862

2.370  
2.370  
2.370  
2.271  
2.087  
2.065  
2.056  
1.941  
1.678  
1.646  
1.522  
1.504  
1.470  
1.438  
1.424

0.288

1.97  
2.07  
2.39  
1.17  
1.09  
3.05  
1.19  
1.16

3.14  
1.00  
3.19  
5.09  
3.47  
4.40  
1.38  
2.90

2.89

8.5 8.0 7.5 7.0 6.5 6.0 5.5 5.0 4.5 4.0 3.5 3.0 2.5 2.0 1.5 1.0 0.5 0.0 -0.5

f1 (ppm)

| Parameter                | Value               |
|--------------------------|---------------------|
| 1 Title                  | ZXQ-19-157-2-C      |
| 2 Origin                 | Bruker BioSpin GmbH |
| 3 Solvent                | CDC13               |
| 4 Temperature            | 300.0               |
| 5 Number of Scans        | 324                 |
| 6 Acquisition Time       | 1.3631              |
| 7 Acquisition Date       | 2019-12-25T16:39:53 |
| 8 Spectrometer Frequency | 100.61              |
| 9 Spectral Width         | 24038.5             |

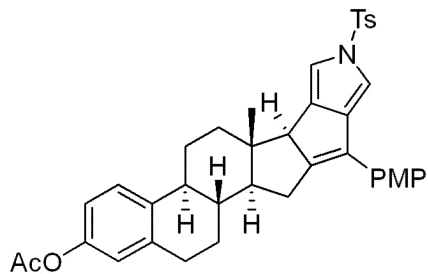

2aj

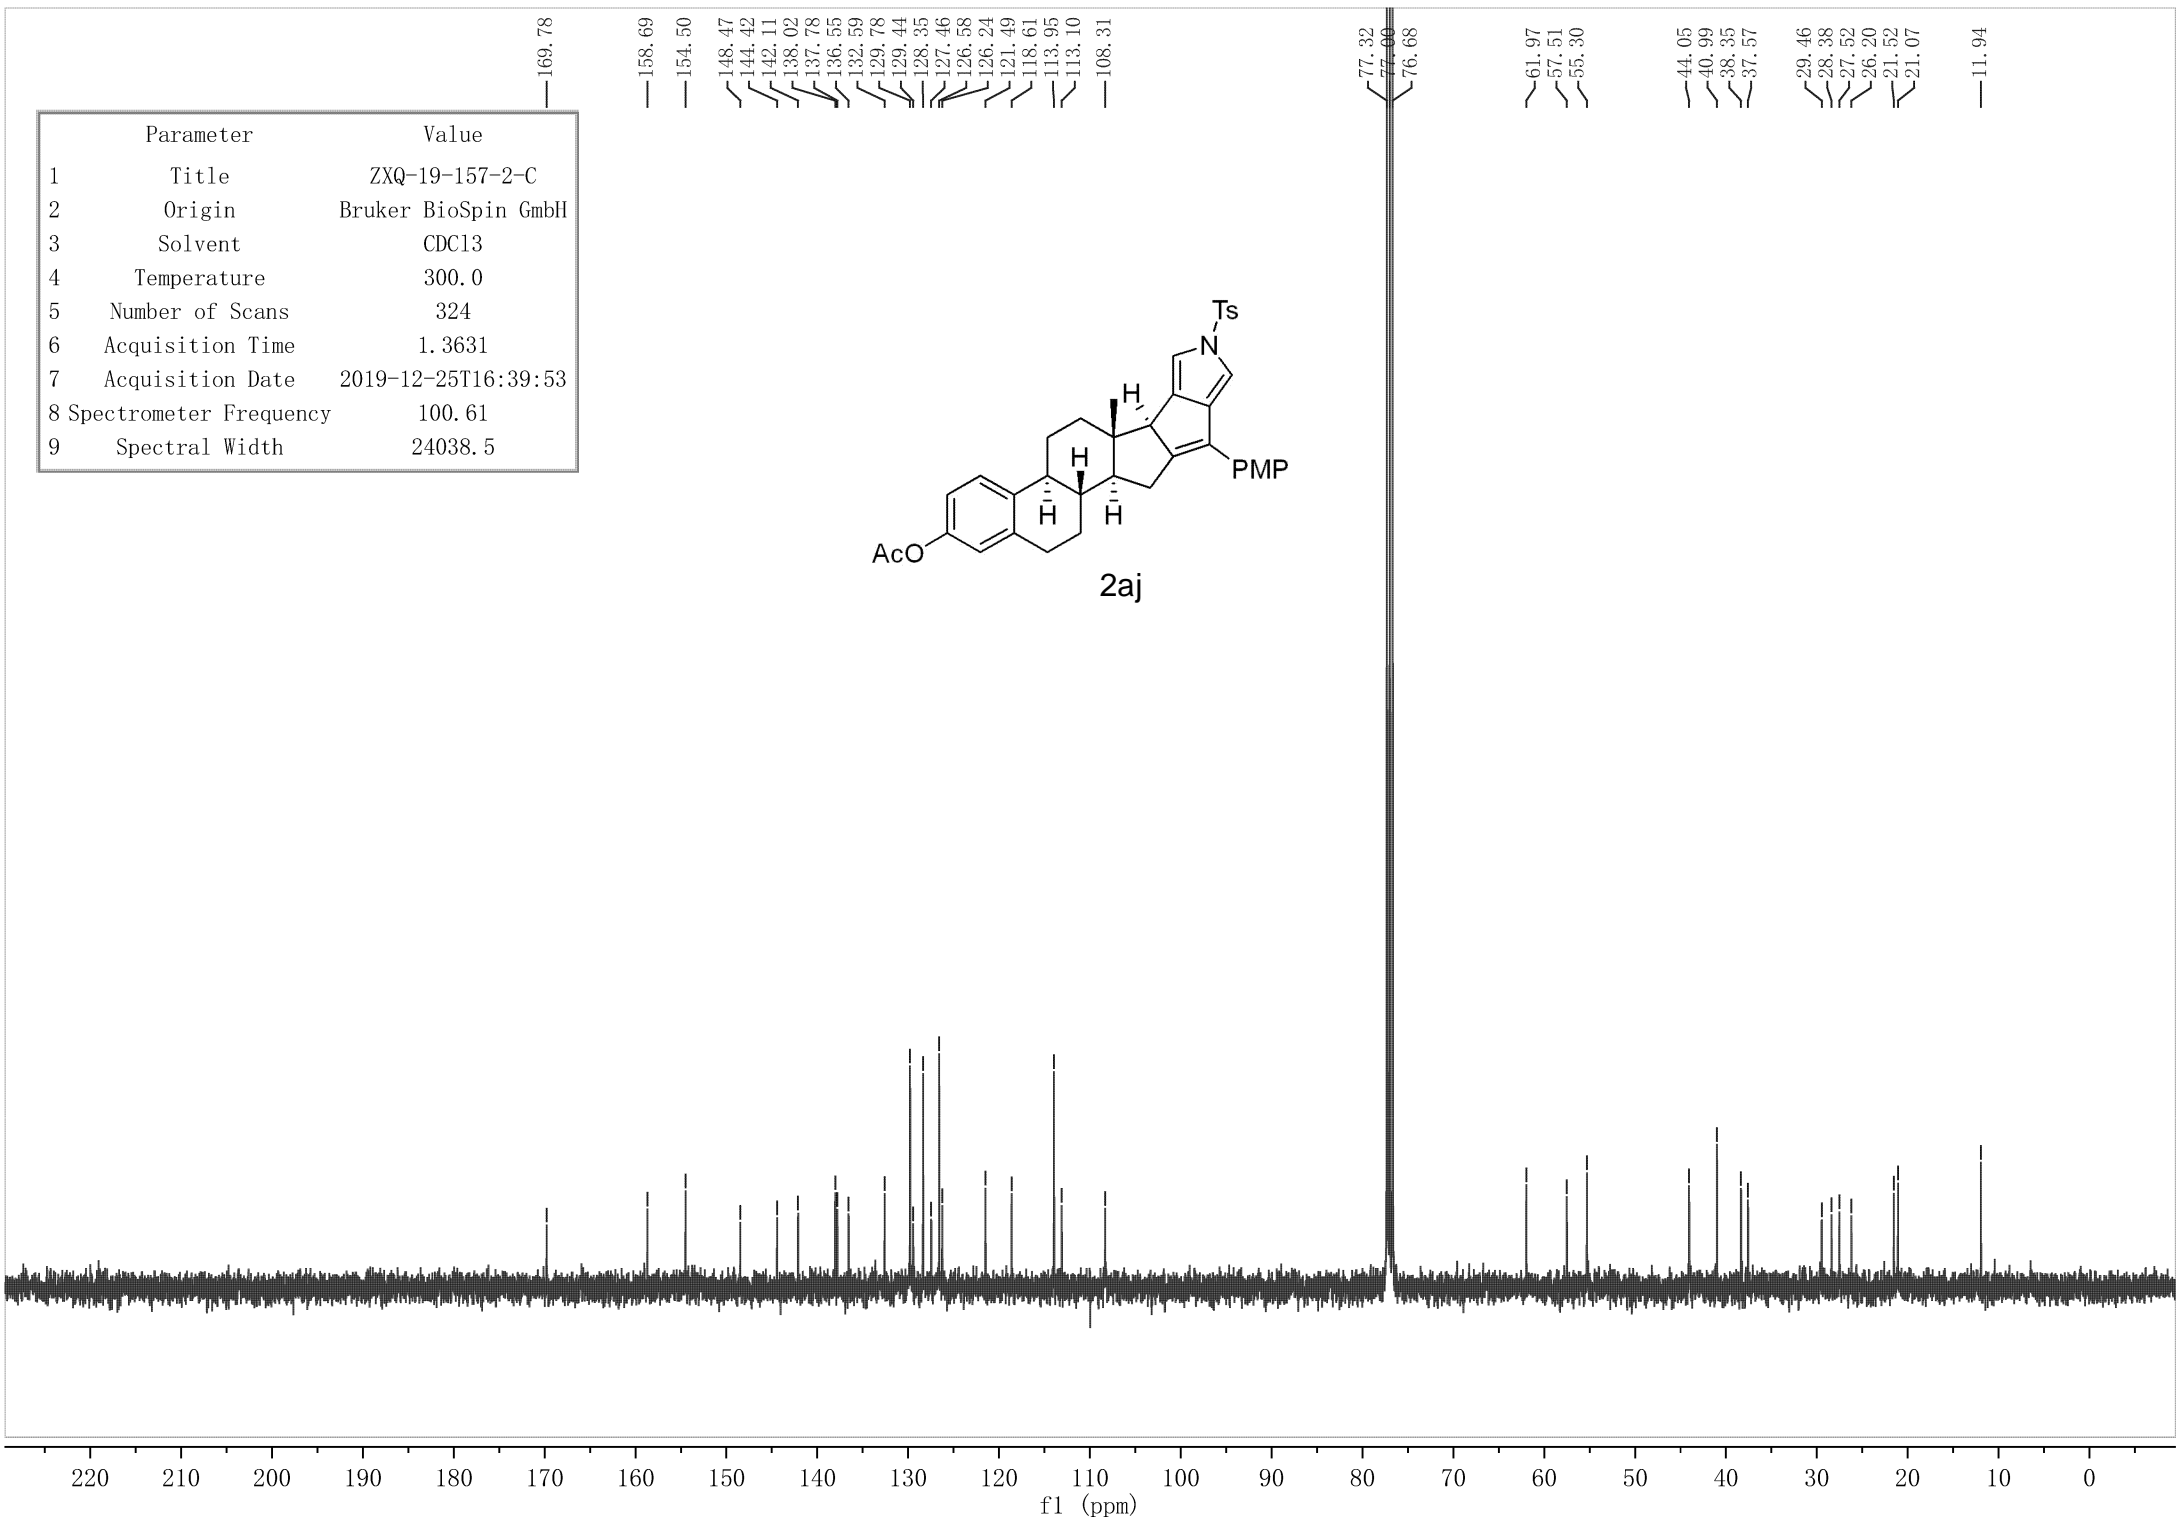



| Parameter                | Value               |
|--------------------------|---------------------|
| 1 Title                  | ZXQ-20-50           |
| 2 Origin                 | Bruker BioSpin GmbH |
| 3 Solvent                | CDC13               |
| 4 Temperature            | 298.4               |
| 5 Number of Scans        | 18                  |
| 6 Acquisition Time       | 3.9846              |
| 7 Acquisition Date       | 2020-04-17T21:11:42 |
| 8 Spectrometer Frequency | 400.03              |
| 9 Spectral Width         | 8223.7              |

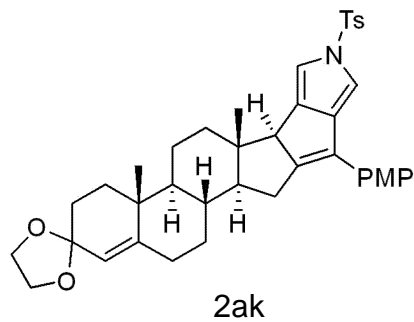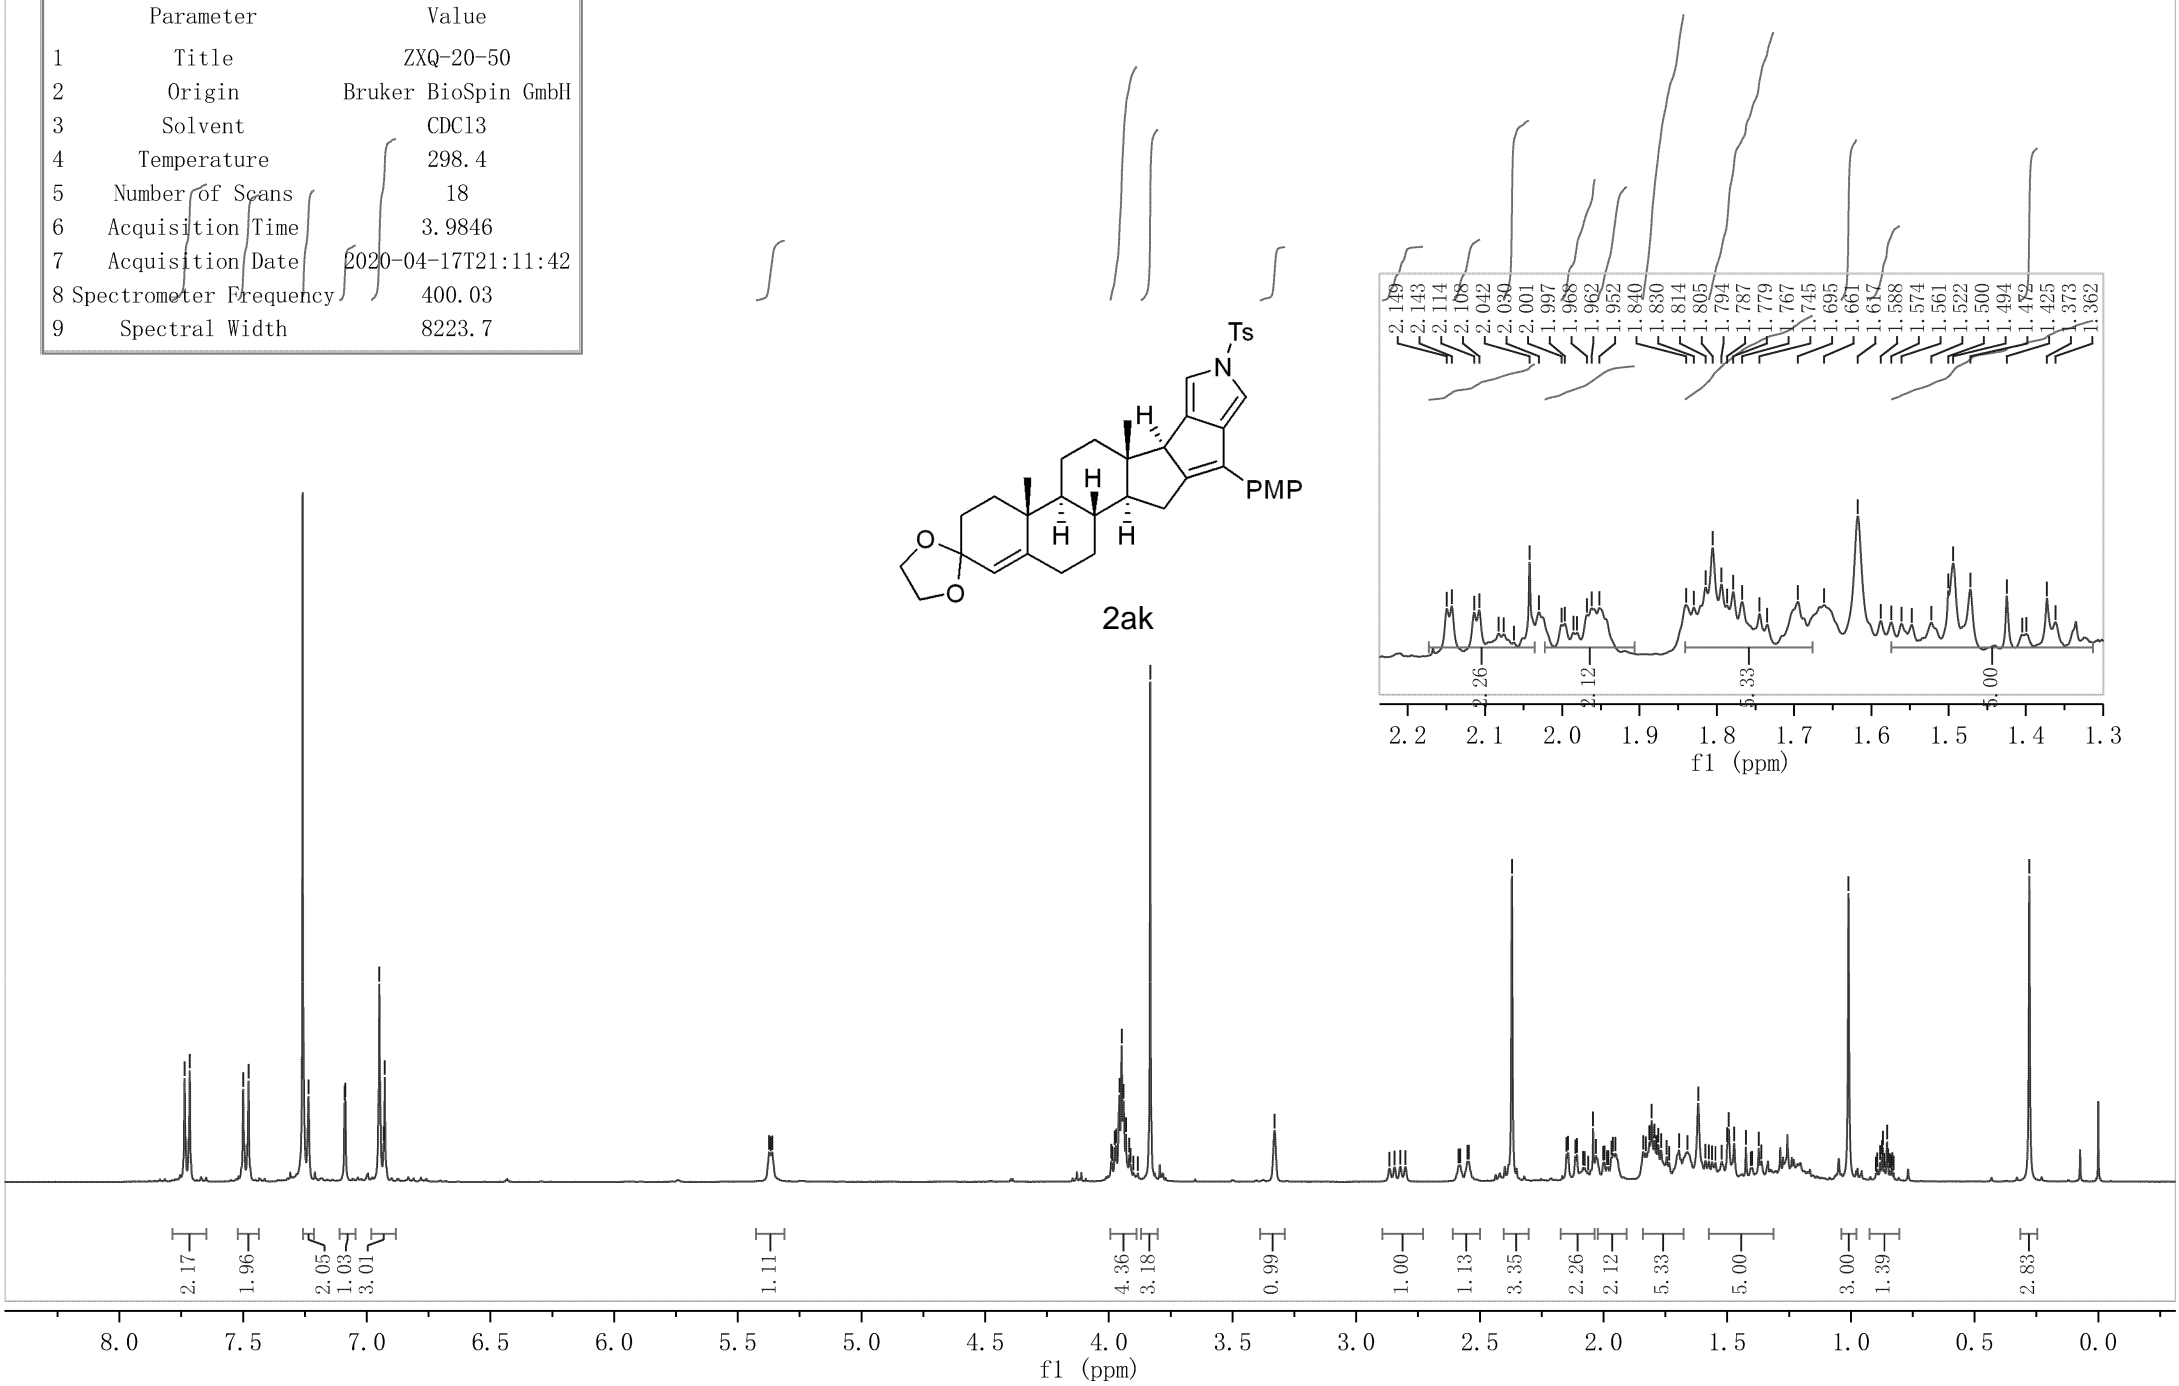

| Parameter                | Value               |
|--------------------------|---------------------|
| 1 Title                  | ZXQ-20-50-C         |
| 2 Origin                 | Bruker BioSpin GmbH |
| 3 Solvent                | CDC13               |
| 4 Temperature            | 298.8               |
| 5 Number of Scans        | 152                 |
| 6 Acquisition Time       | 1.3631              |
| 7 Acquisition Date       | 2020-04-17T21:15:16 |
| 8 Spectrometer Frequency | 100.59              |
| 9 Spectral Width         | 24038.5             |

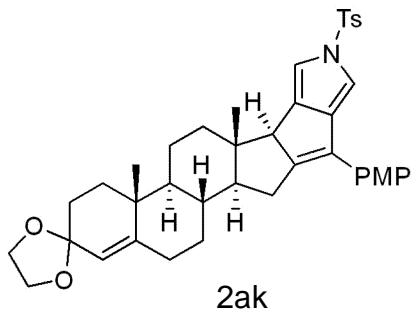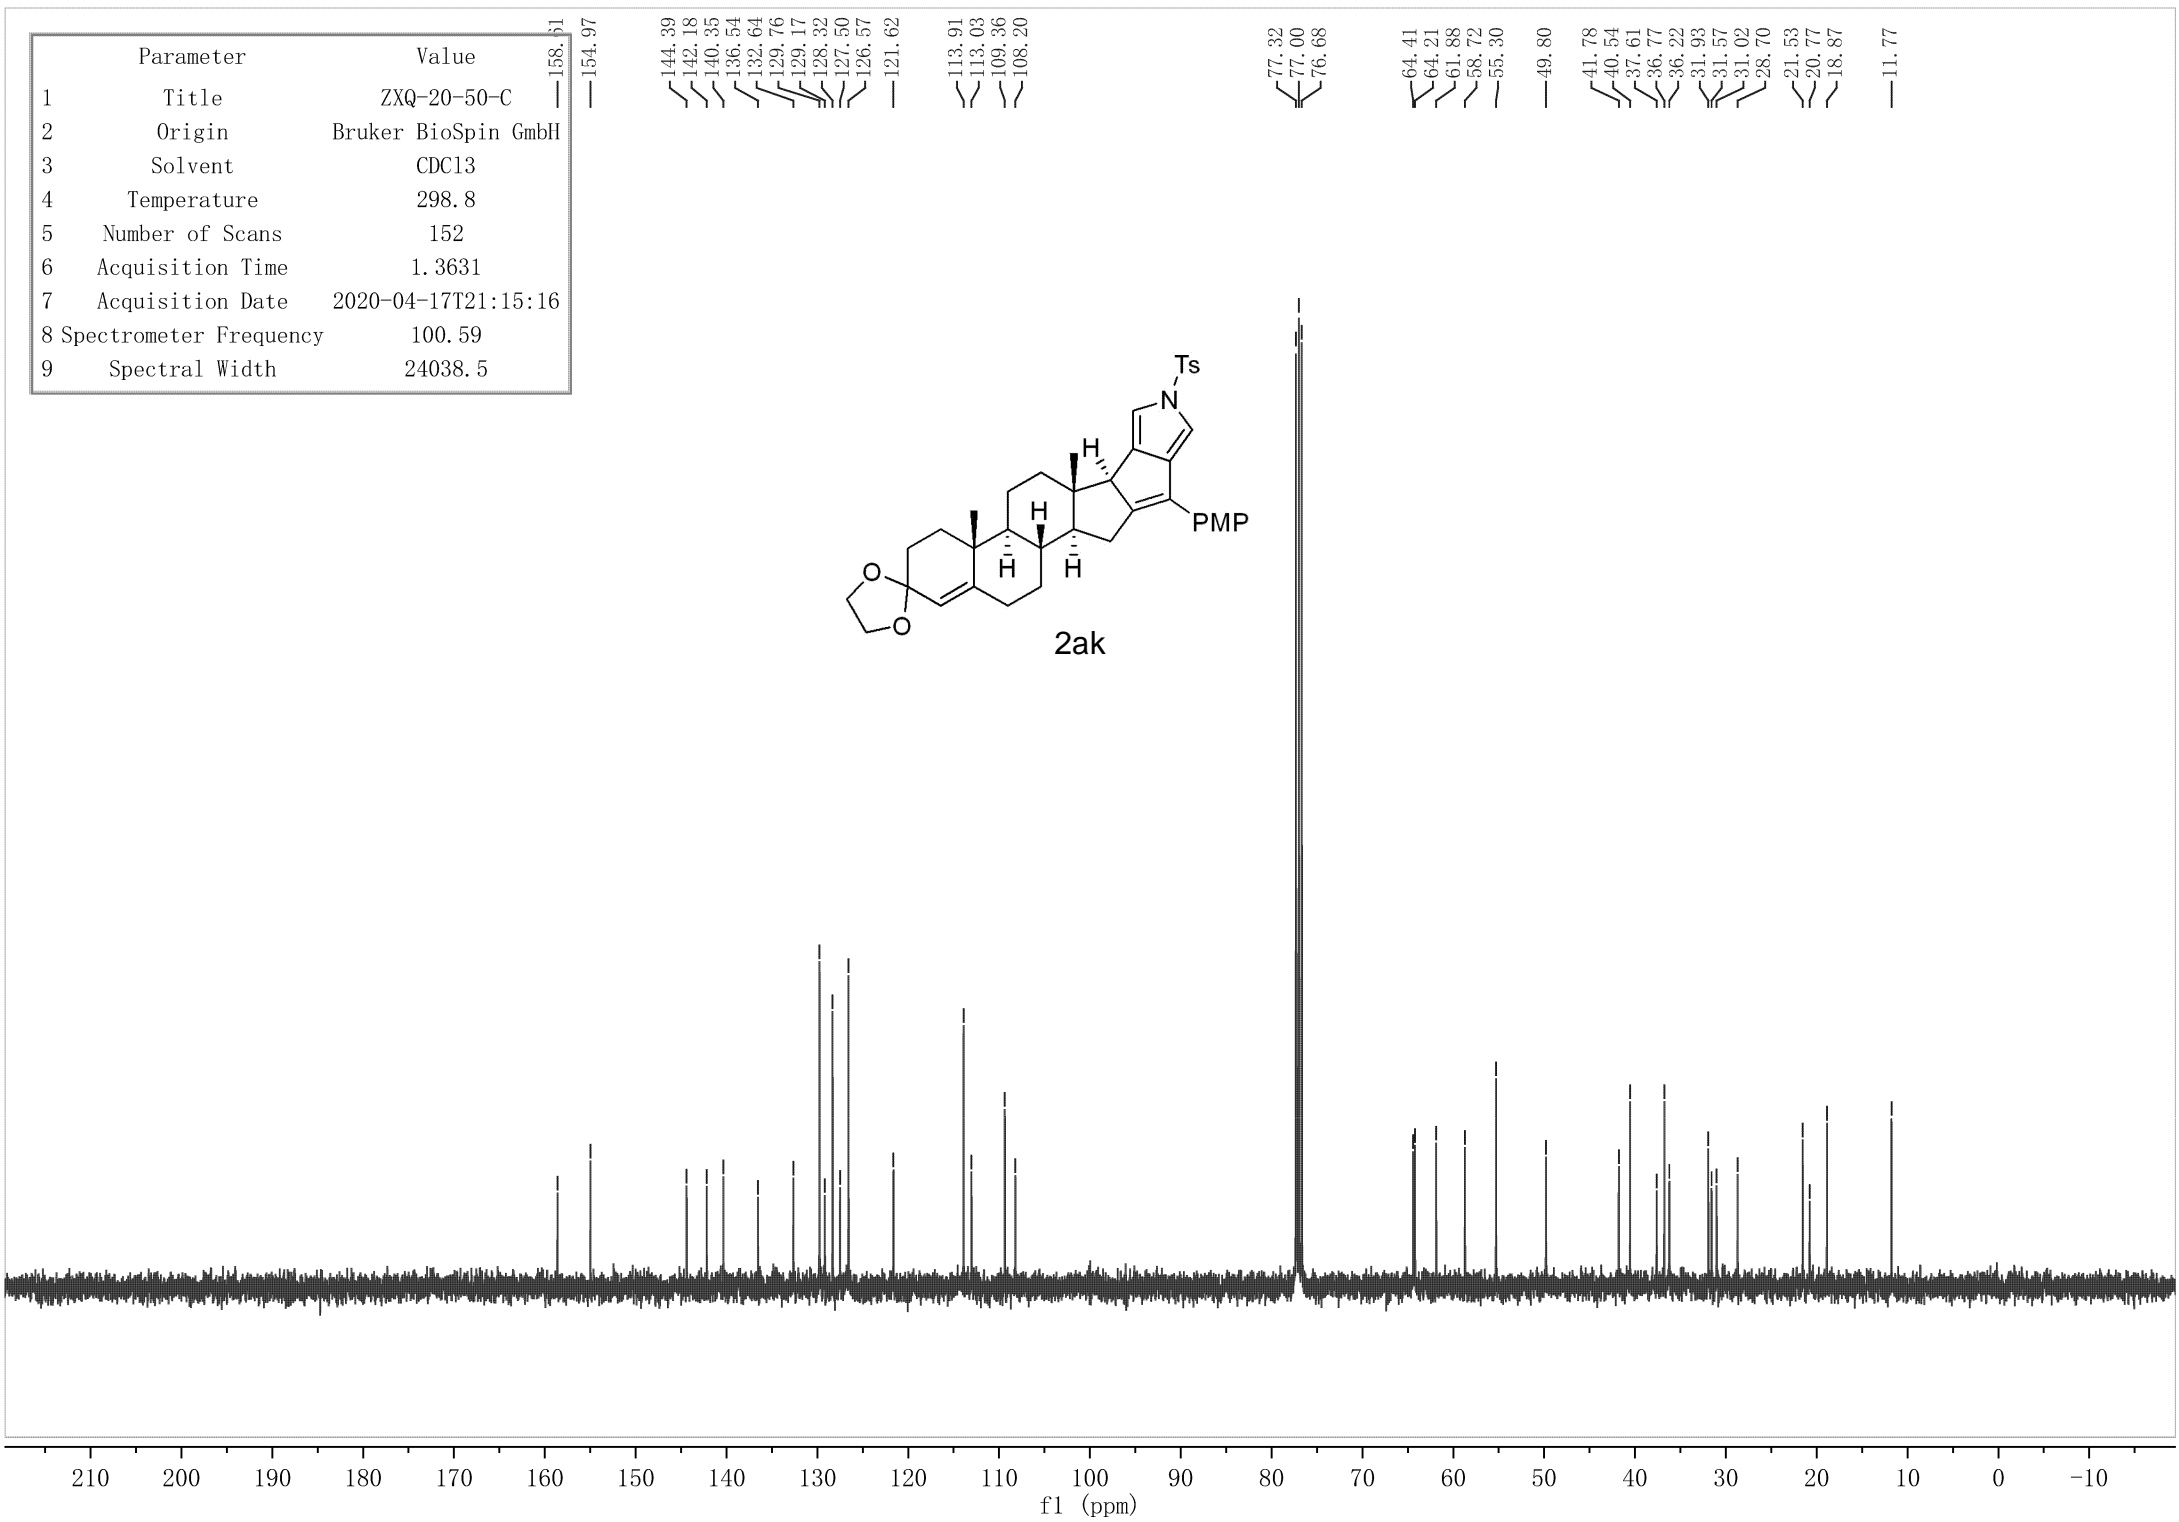

| Parameter                | Value               |
|--------------------------|---------------------|
| 1 Title                  | ZXQ-20-50-C-DEPT    |
| 2 Origin                 | Bruker BioSpin GmbH |
| 3 Solvent                | CDC13               |
| 4 Temperature            | 299.2               |
| 5 Number of Scans        | 56                  |
| 6 Acquisition Time       | 1.3631              |
| 7 Acquisition Date       | 2020-04-17T21:24:35 |
| 8 Spectrometer Frequency | 100.59              |
| 9 Spectral Width         | 24038.5             |

129.76 128.32 126.57 121.63 113.90 113.03 108.20  
 64.41 64.21 61.88 58.71 55.30 49.80 41.78 37.61 36.22 31.93 31.57 31.01 28.70 21.54 20.77 18.87 11.77

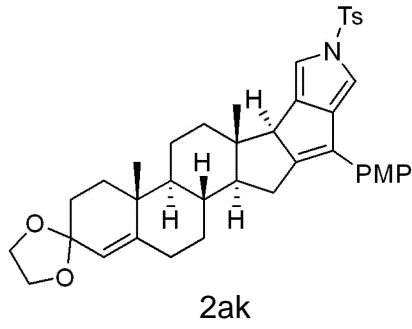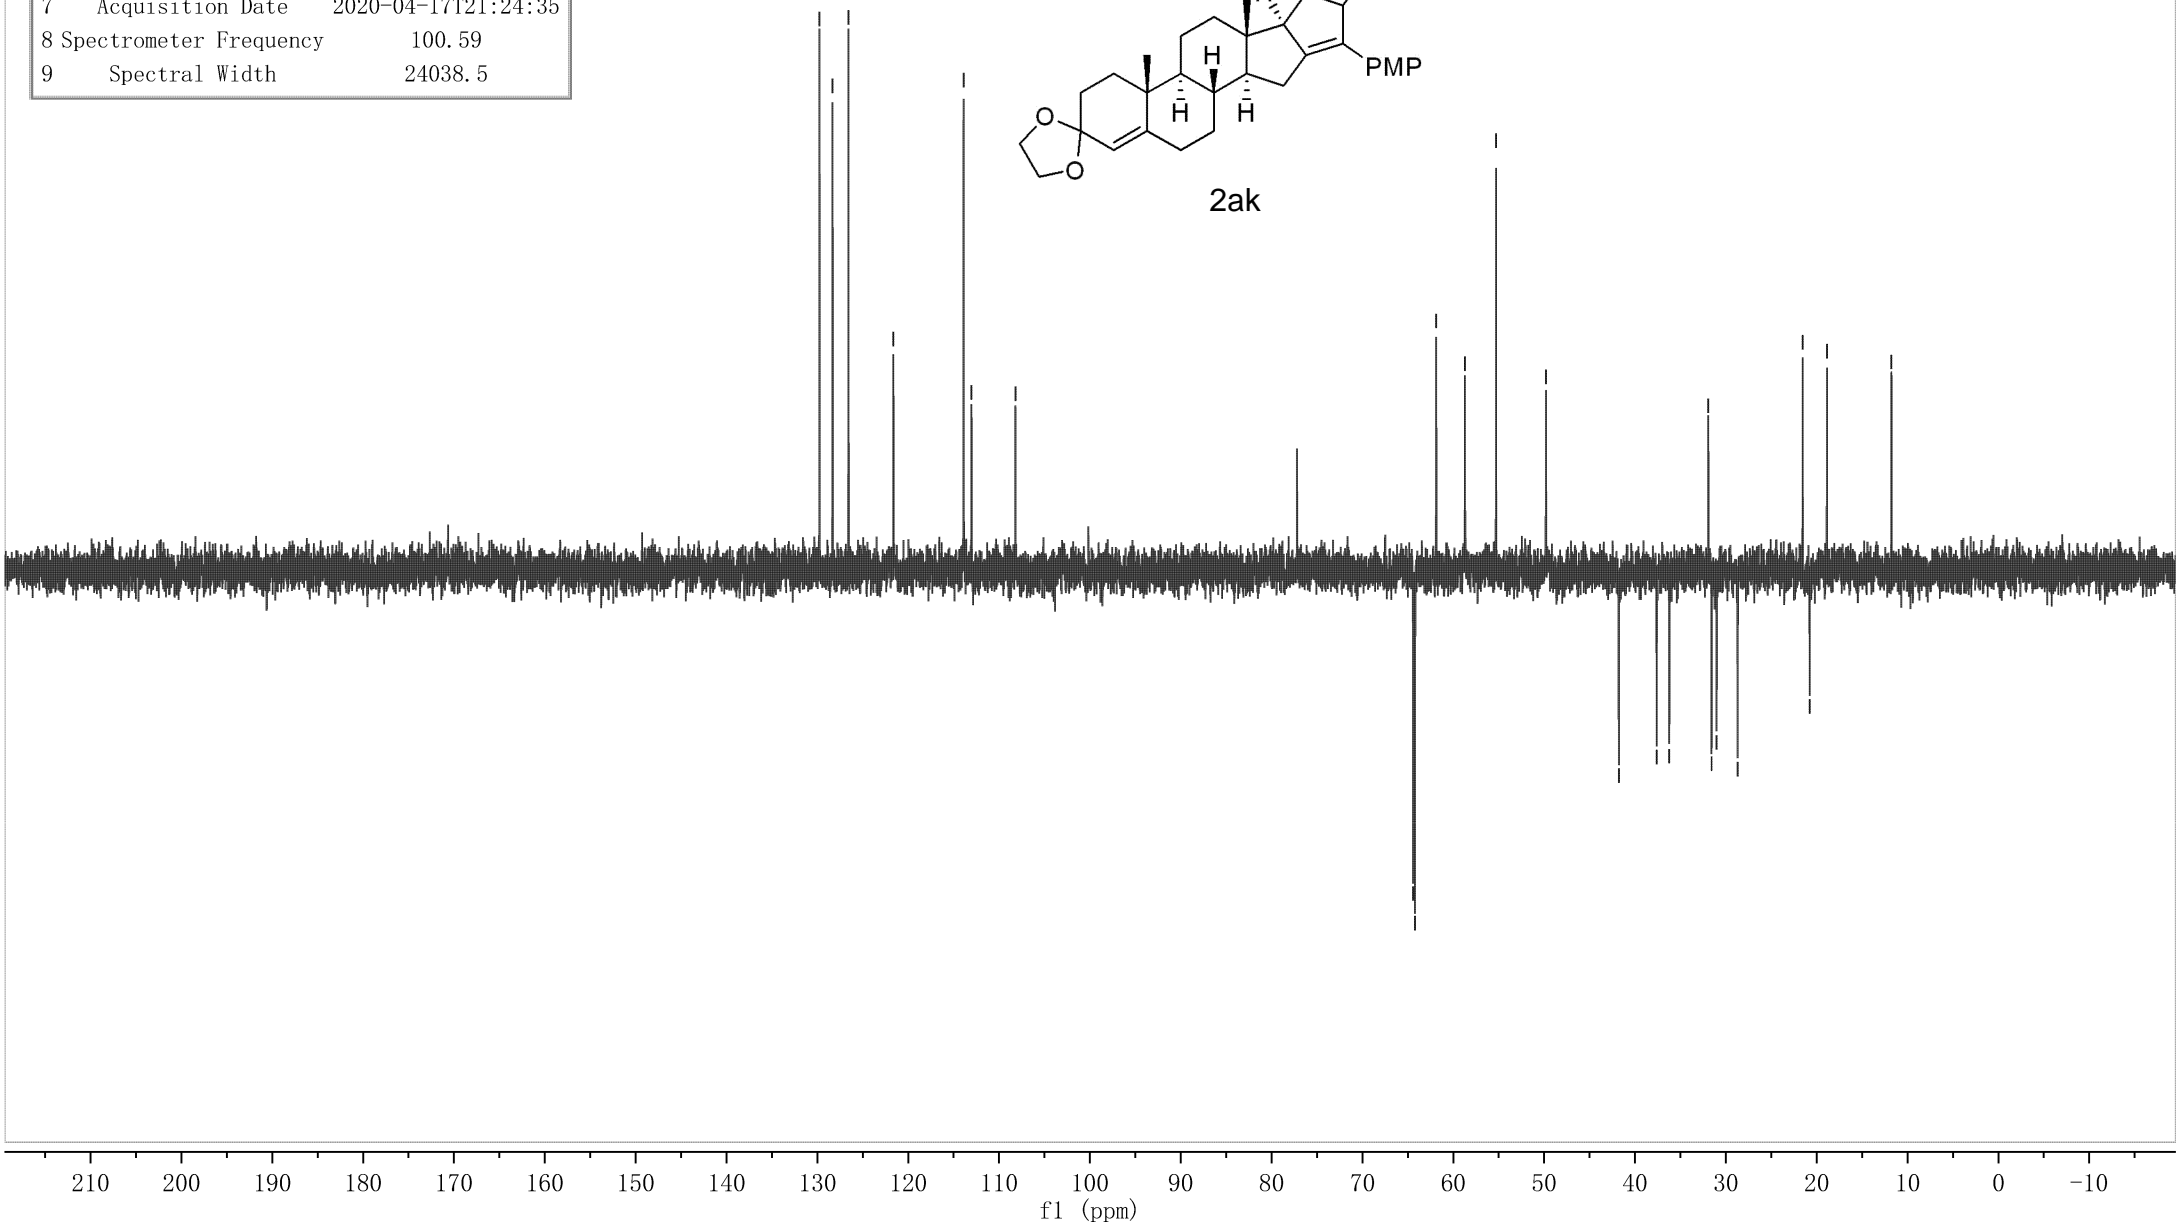

7.767  
7.746  
7.520  
7.498  
7.272  
7.247  
7.206  
7.203  
7.060  
7.057  
6.758  
6.736  
6.392  
6.386  
5.350  
5.337  
4.451  
4.432  
4.413  
3.709  
3.691  
3.671  
3.618  
3.596  
3.578  
3.502  
3.496  
3.476  
3.469  
3.416  
3.389  
3.380  
3.359  
3.337  
3.182  
3.171  
3.163  
3.143  
2.996  
2.410  
2.383  
2.276  
2.247  
2.207  
2.057  
2.008  
1.996  
1.983  
1.921  
1.906  
1.888  
1.872  
1.851  
1.807  
1.786  
1.769  
1.741  
1.698  
1.686  
1.655  
1.628  
1.601  
1.589  
1.548  
1.527  
1.516  
1.508  
1.497  
1.486  
1.464  
1.455  
1.440  
1.388  
1.350  
1.311  
1.300  
1.289  
1.281  
1.271  
1.289  
1.281  
1.271  
1.196  
1.184  
1.152  
1.111  
1.103  
1.057  
1.034  
1.025  
0.998  
0.988  
0.980  
0.953  
0.898  
0.890  
0.886  
0.870  
0.865  
0.849  
0.810

| Parameter                | Value               |
|--------------------------|---------------------|
| 1 Title                  | ZXQ-21-13           |
| 2 Origin                 | Bruker BioSpin GmbH |
| 3 Solvent                | CDC13               |
| 4 Temperature            | 298.7               |
| 5 Number of Scans        | 9                   |
| 6 Acquisition Time       | 3.9846              |
| 7 Acquisition Date       | 2020-06-07T08:29:44 |
| 8 Spectrometer Frequency | 400.03              |
| 9 Spectral Width         | 8223.7              |

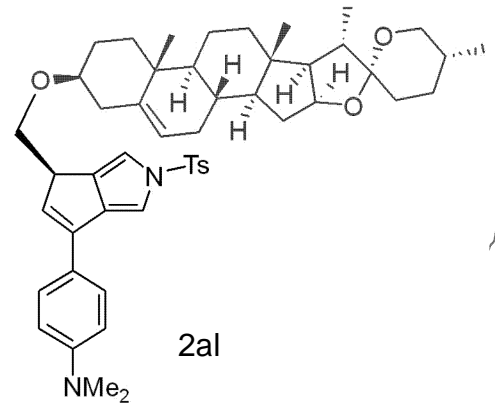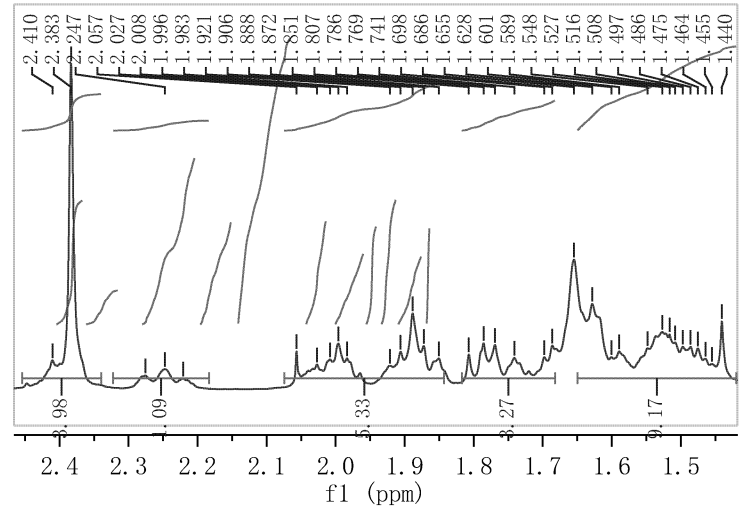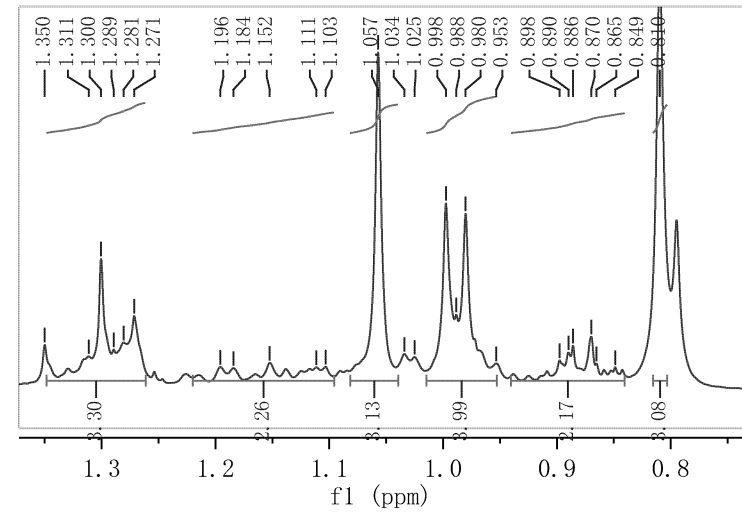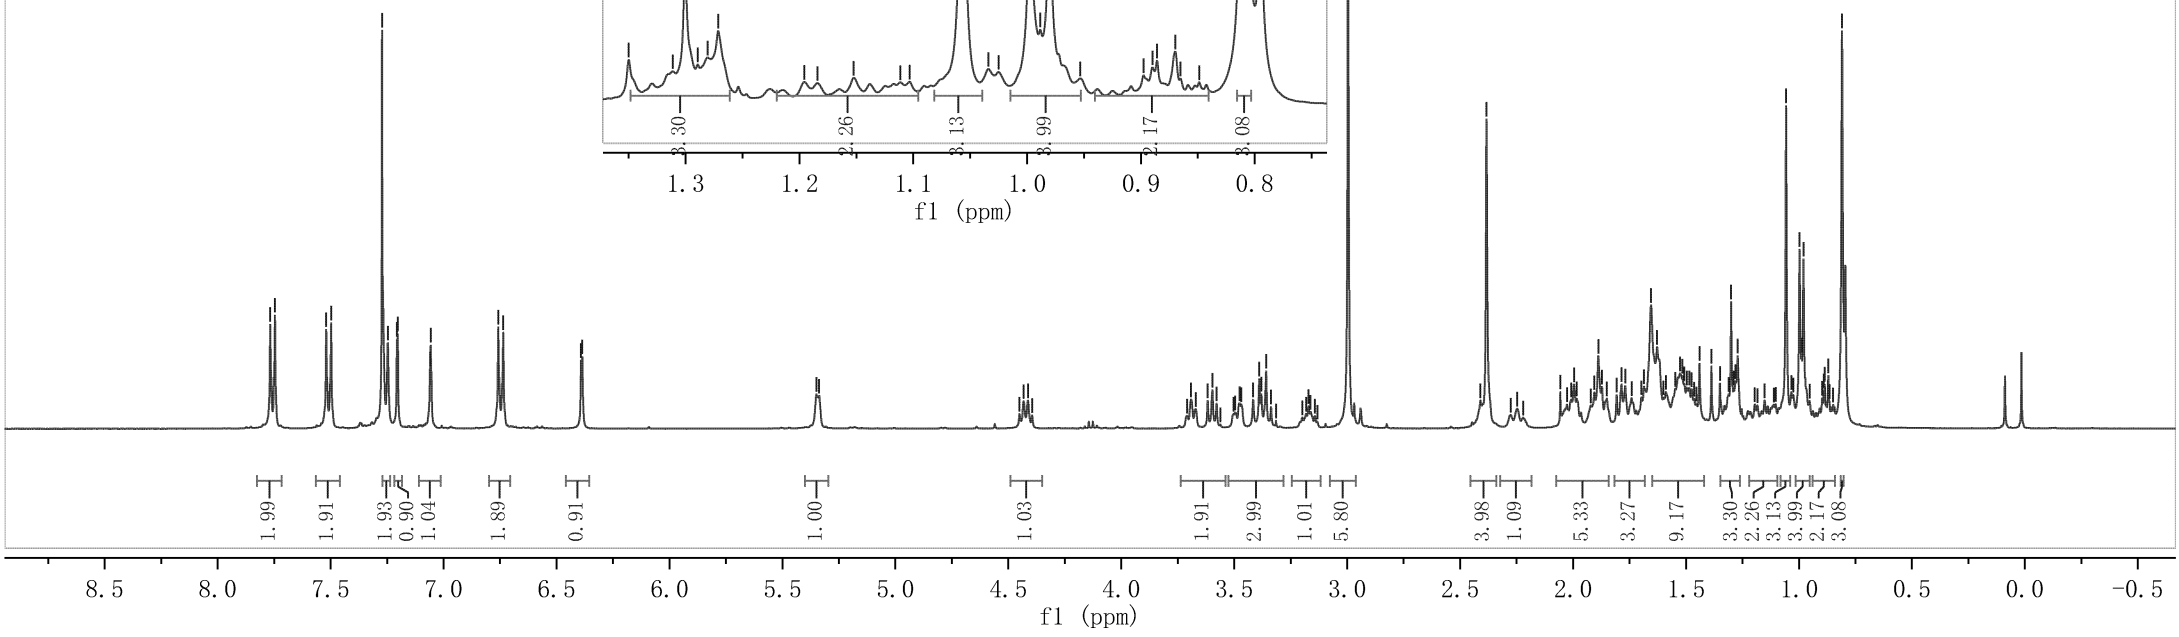

| Parameter                | Value               |
|--------------------------|---------------------|
| 1 Title                  | ZXQ-21-13-C         |
| 2 Origin                 | Bruker BioSpin GmbH |
| 3 Solvent                | CDC13               |
| 4 Temperature            | 298.8               |
| 5 Number of Scans        | 630                 |
| 6 Acquisition Time       | 1.3631              |
| 7 Acquisition Date       | 2020-06-07T08:32:27 |
| 8 Spectrometer Frequency | 100.59              |
| 9 Spectral Width         | 24038.5             |

150.27  
144.47  
140.92  
138.35  
137.16  
136.51  
136.44  
130.05  
129.80  
127.18  
126.71  
122.54  
121.30  
113.49  
112.22  
109.26

80.80  
79.40  
77.32  
77.00  
76.68

69.77  
66.82  
62.08

56.49

50.08

44.70

41.58

40.41

40.24

39.16

37.00

31.41

30.27

28.78

21.55

20.83

19.42

17.11

16.26

14.50

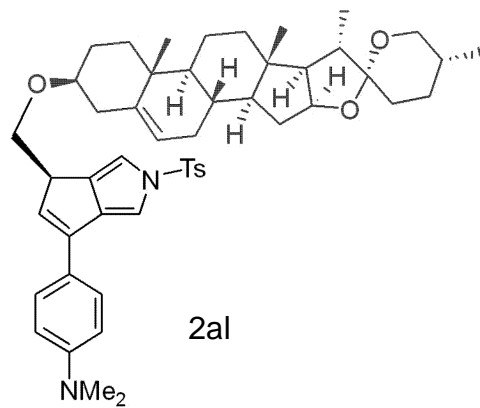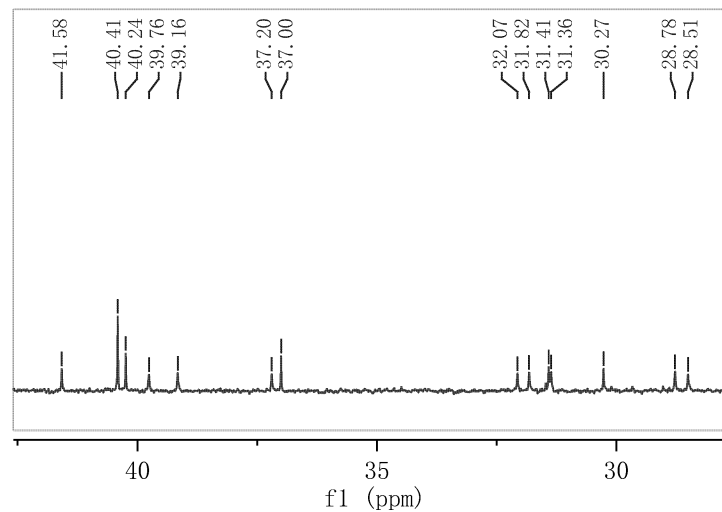

210 200 190 180 170 160 150 140 130 120 110 100 90 80 70 60 50 40 30 20 10 0 -10

f1 (ppm)

| Parameter                | Value               |
|--------------------------|---------------------|
| 1 Title                  | ZXQ-21-13-C-DEPT    |
| 2 Origin                 | Bruker BioSpin GmbH |
| 3 Solvent                | CDC13               |
| 4 Temperature            | 298.9               |
| 5 Number of Scans        | 80                  |
| 6 Acquisition Time       | 1.3631              |
| 7 Acquisition Date       | 2020-06-07T09:08:51 |
| 8 Spectrometer Frequency | 100.59              |
| 9 Spectral Width         | 24038.5             |

130.05 129.81 127.18 126.71 121.30 113.49 112.23 109.23 80.80 79.41 69.77 66.82 62.08 56.50 50.09 44.70 41.58 40.41 39.16 37.20 31.83 31.36 30.27 28.78 28.55 20.84 19.42 17.11 16.26 14.50

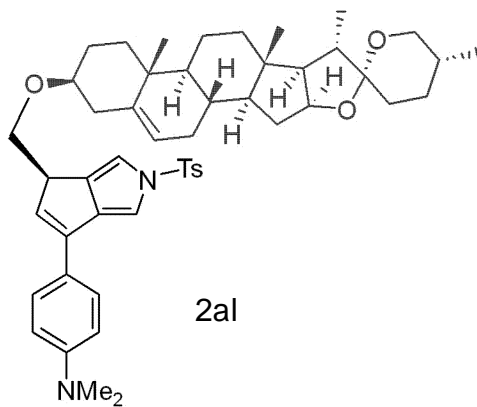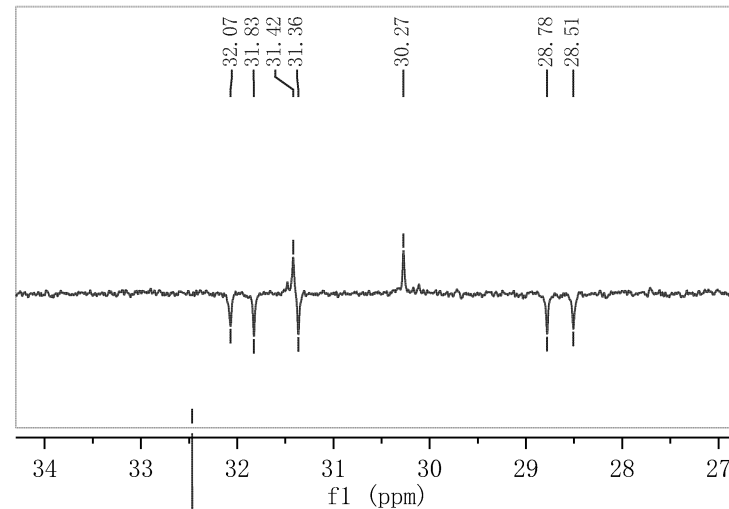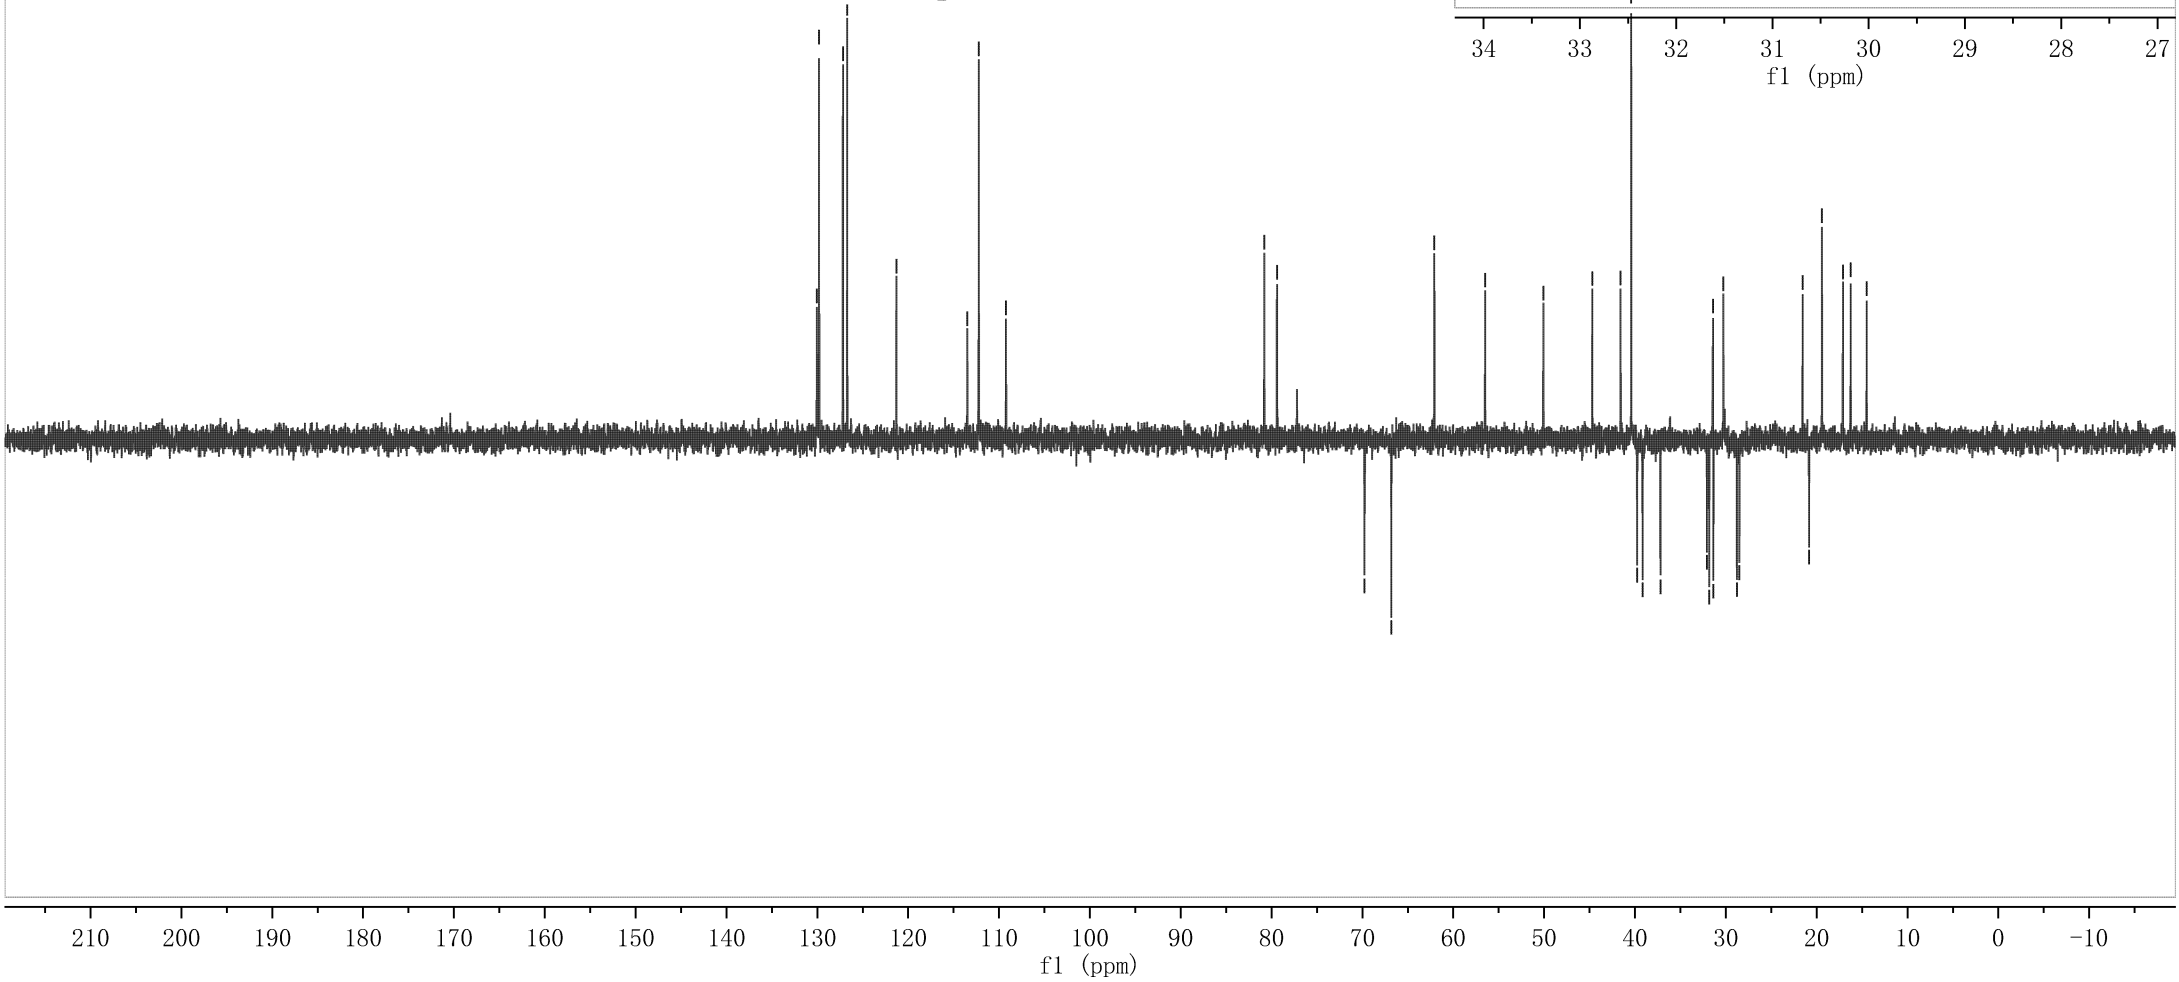

7.738  
7.718

7.353  
7.333

6.775

4.206  
4.200  
4.179  
4.176  
4.173  
4.166  
4.054  
4.049  
4.043  
4.021  
4.015  
4.010  
4.008  
3.981  
3.978  
3.972  
3.969  
3.948  
3.939  
3.936  
3.927  
3.918  
3.887  
3.785  
3.774  
3.768  
3.757  
3.753  
3.749  
3.744  
3.740  
3.736  
3.732

3.273  
3.273  
3.266  
3.252  
3.244  
3.231  
3.222  
3.039  
3.039  
3.034  
3.030

1.593  
1.583  
1.577  
1.563  
1.557  
1.547  
1.403  
1.392  
1.389  
1.376  
1.357  
1.350  
1.336  
1.336  
1.321  
1.306  
1.291  
1.281  
1.279  
1.263  
1.254  
1.248  
1.092  
1.080  
1.076  
1.064  
1.059  
1.043  
0.933  
0.917  
0.901  
0.886

| Parameter                | Value               |
|--------------------------|---------------------|
| 1 Title                  | ZXQ-19-191          |
| 2 Origin                 | Bruker BioSpin GmbH |
| 3 Solvent                | CDCl3               |
| 4 Temperature            | 298.0               |
| 5 Number of Scans        | 11                  |
| 6 Acquisition Time       | 4.0894              |
| 7 Acquisition Date       | 2020-01-01T15:42:52 |
| 8 Spectrometer Frequency | 400.13              |
| 9 Spectral Width         | 8012.8              |

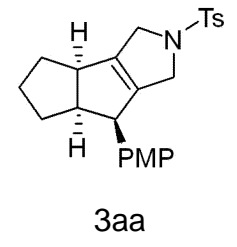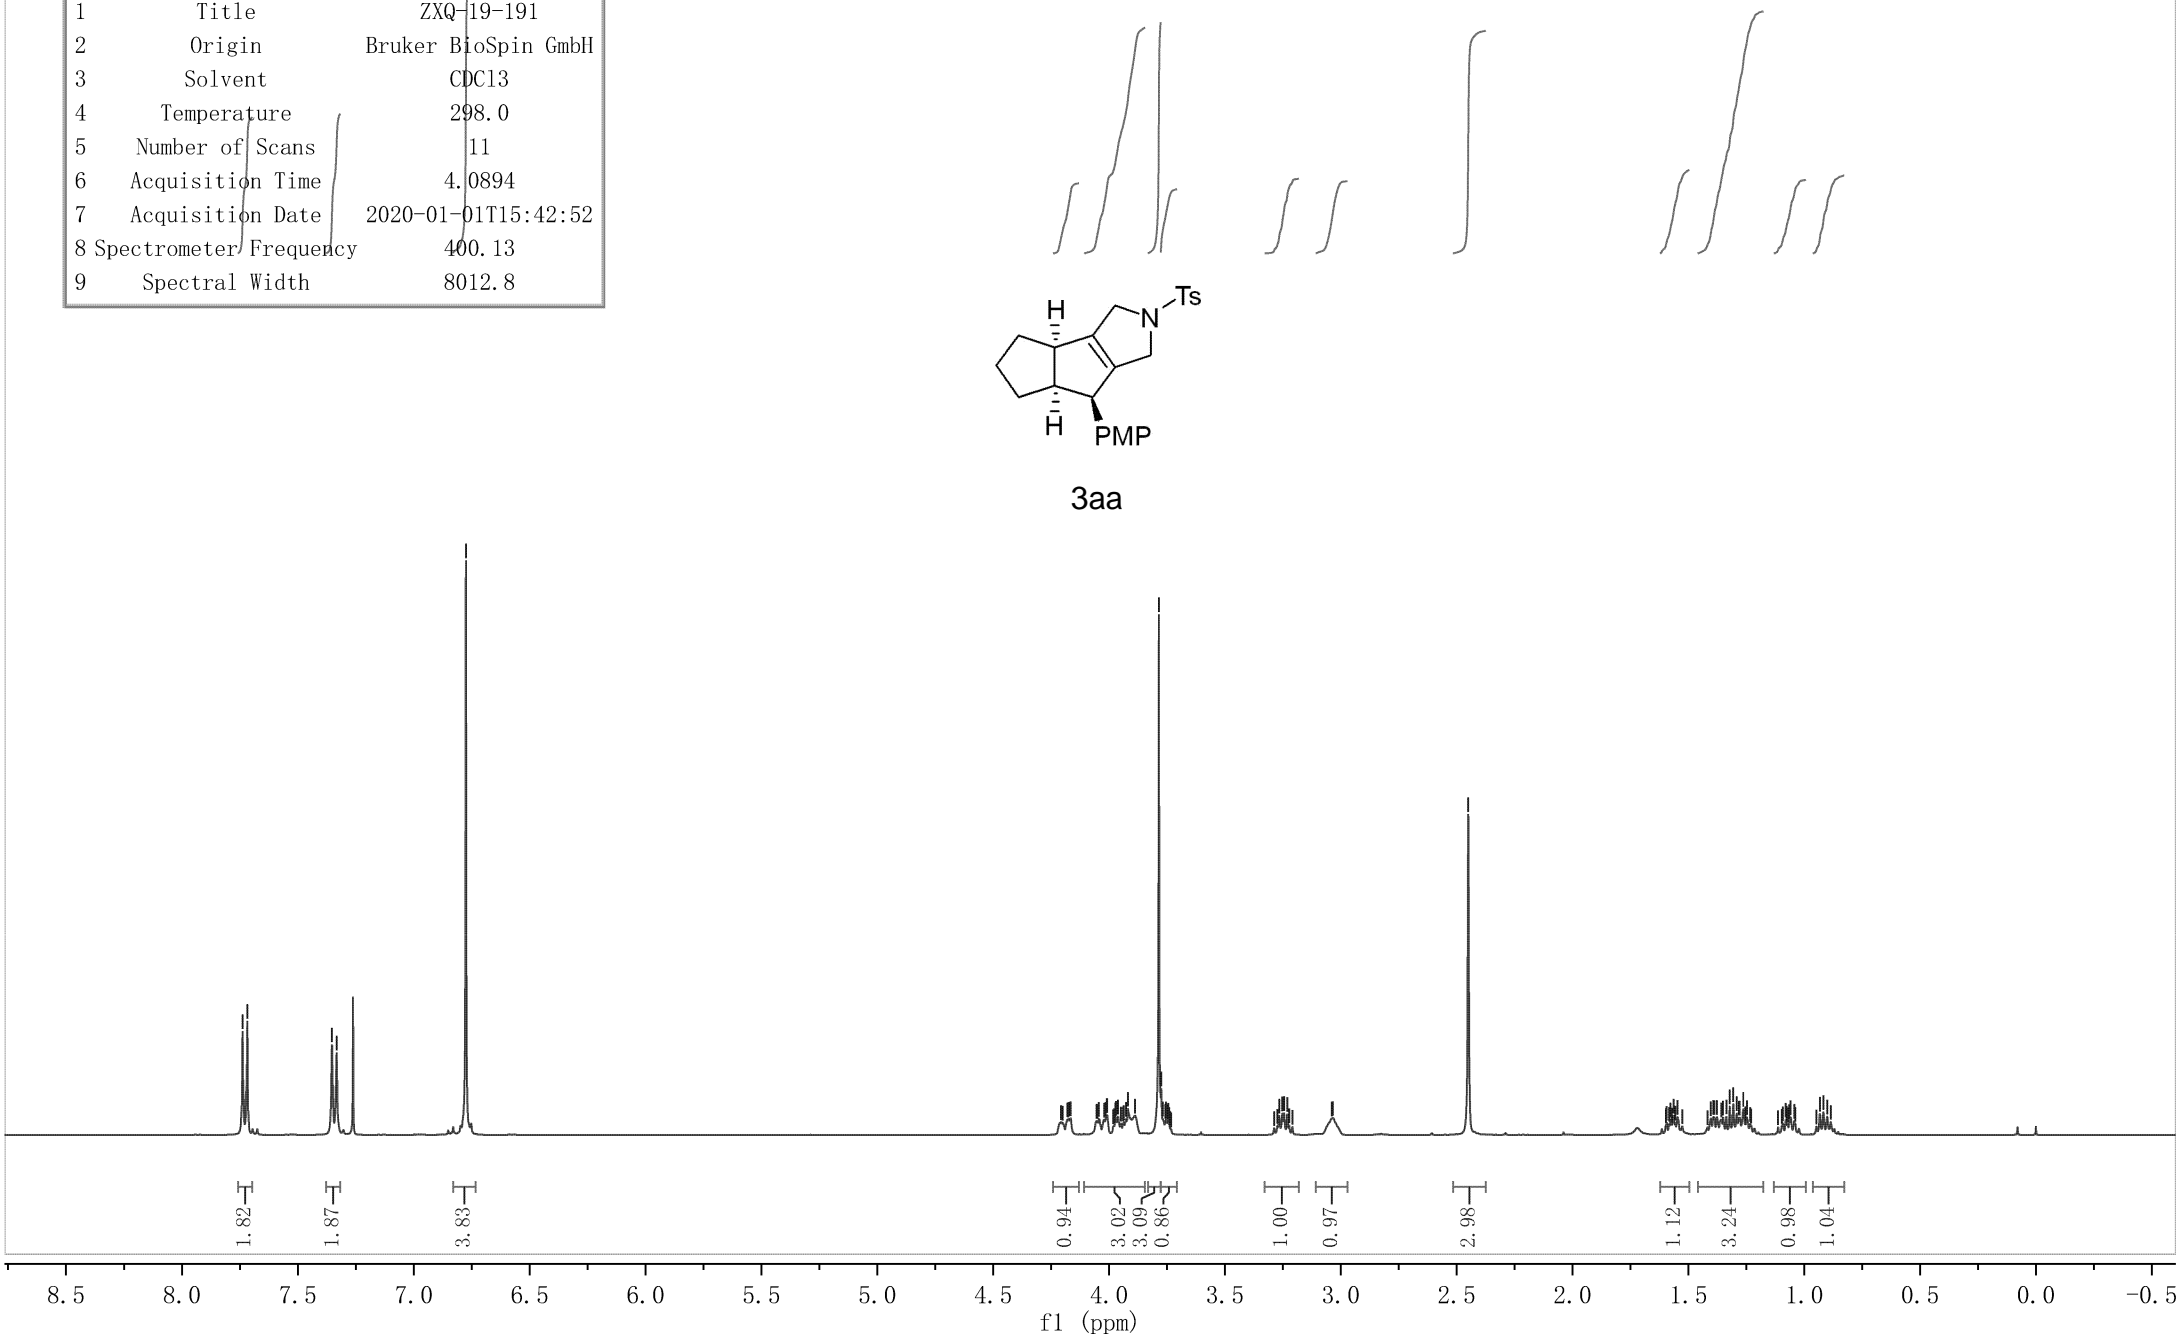

| Parameter                | Value               |
|--------------------------|---------------------|
| 1 Title                  | ZXQ-19-191-C        |
| 2 Origin                 | Bruker BioSpin GmbH |
| 3 Solvent                | CDC13               |
| 4 Temperature            | 300.0               |
| 5 Number of Scans        | 31                  |
| 6 Acquisition Time       | 1.3631              |
| 7 Acquisition Date       | 2020-01-01T15:44:34 |
| 8 Spectrometer Frequency | 100.61              |
| 9 Spectral Width         | 24038.5             |

158.04  
 144.91  
 143.30  
 140.78  
 134.48  
 131.79  
 129.64  
 129.38  
 127.38  
 113.49  
 77.32  
 77.00  
 76.68  
 55.14  
 52.49  
 51.68  
 51.58  
 48.99  
 45.94  
 30.10  
 29.01  
 26.40  
 21.47

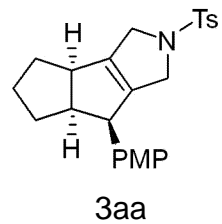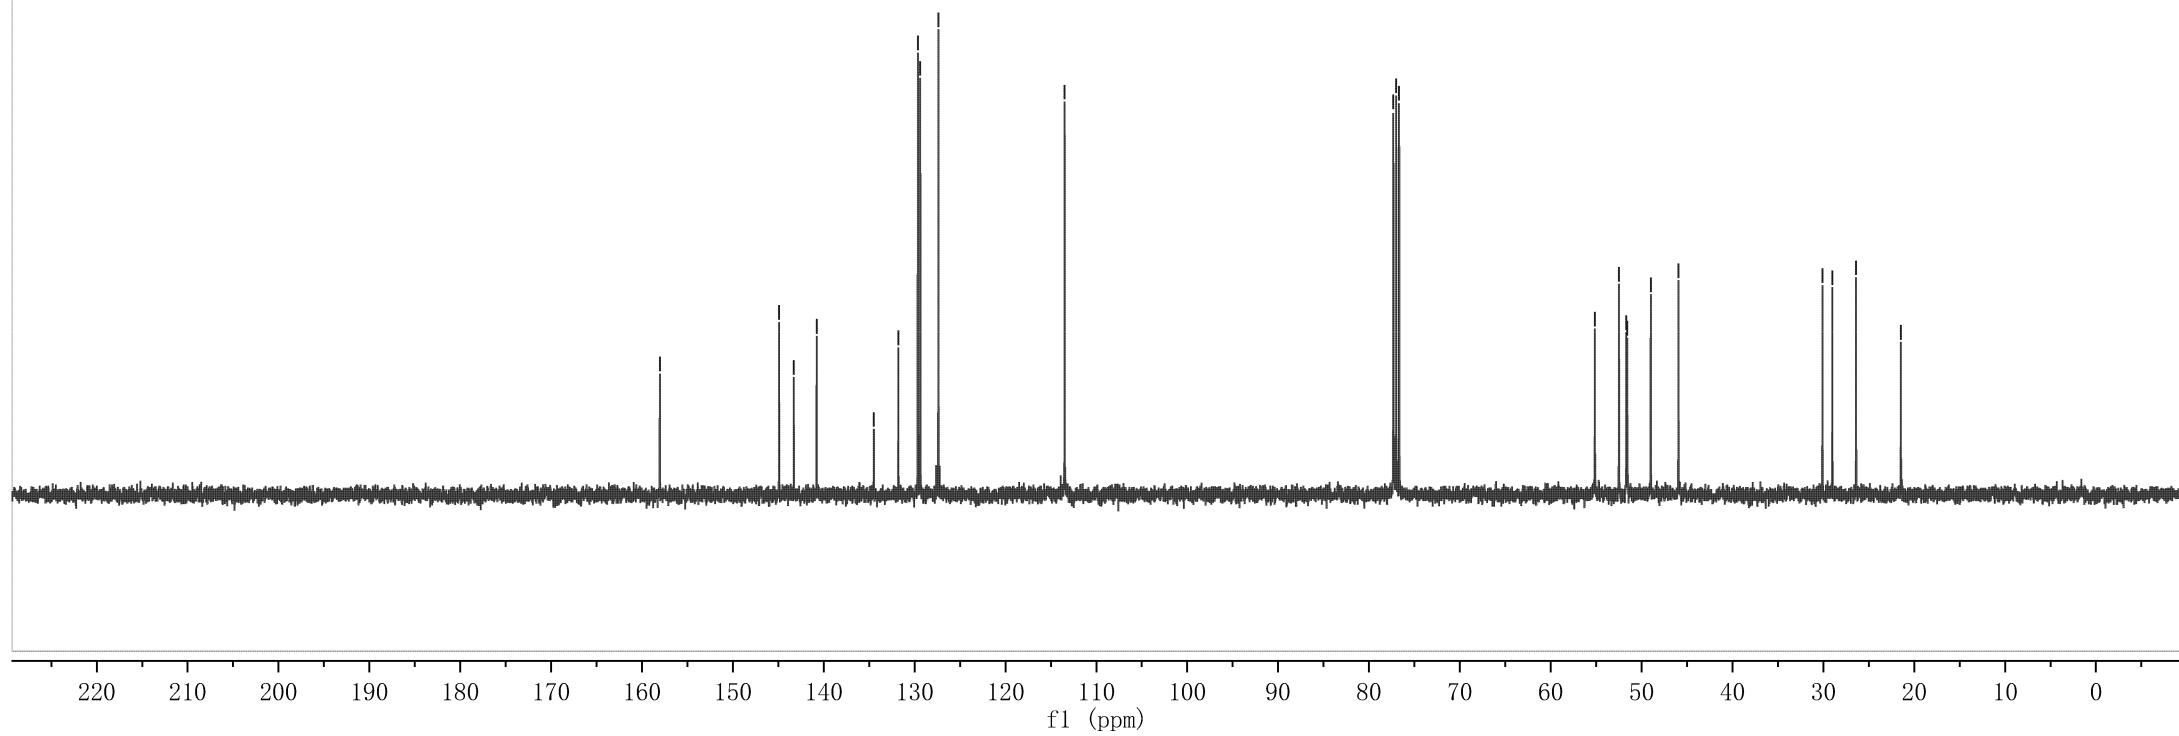



| Parameter                | Value               |
|--------------------------|---------------------|
| 1 Title                  | ZXQ-19-191-C-DEPT   |
| 2 Origin                 | Bruker BioSpin GmbH |
| 3 Solvent                | CDC13               |
| 4 Temperature            | 300.0               |
| 5 Number of Scans        | 32                  |
| 6 Acquisition Time       | 1.3631              |
| 7 Acquisition Date       | 2020-01-01T15:47:31 |
| 8 Spectrometer Frequency | 100.61              |
| 9 Spectral Width         | 24038.5             |

129.65  
129.38  
127.39

113.50

55.15  
52.50  
51.68  
51.58  
49.00  
45.95

30.10  
29.01  
26.40  
21.47

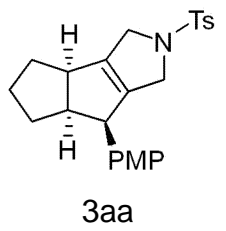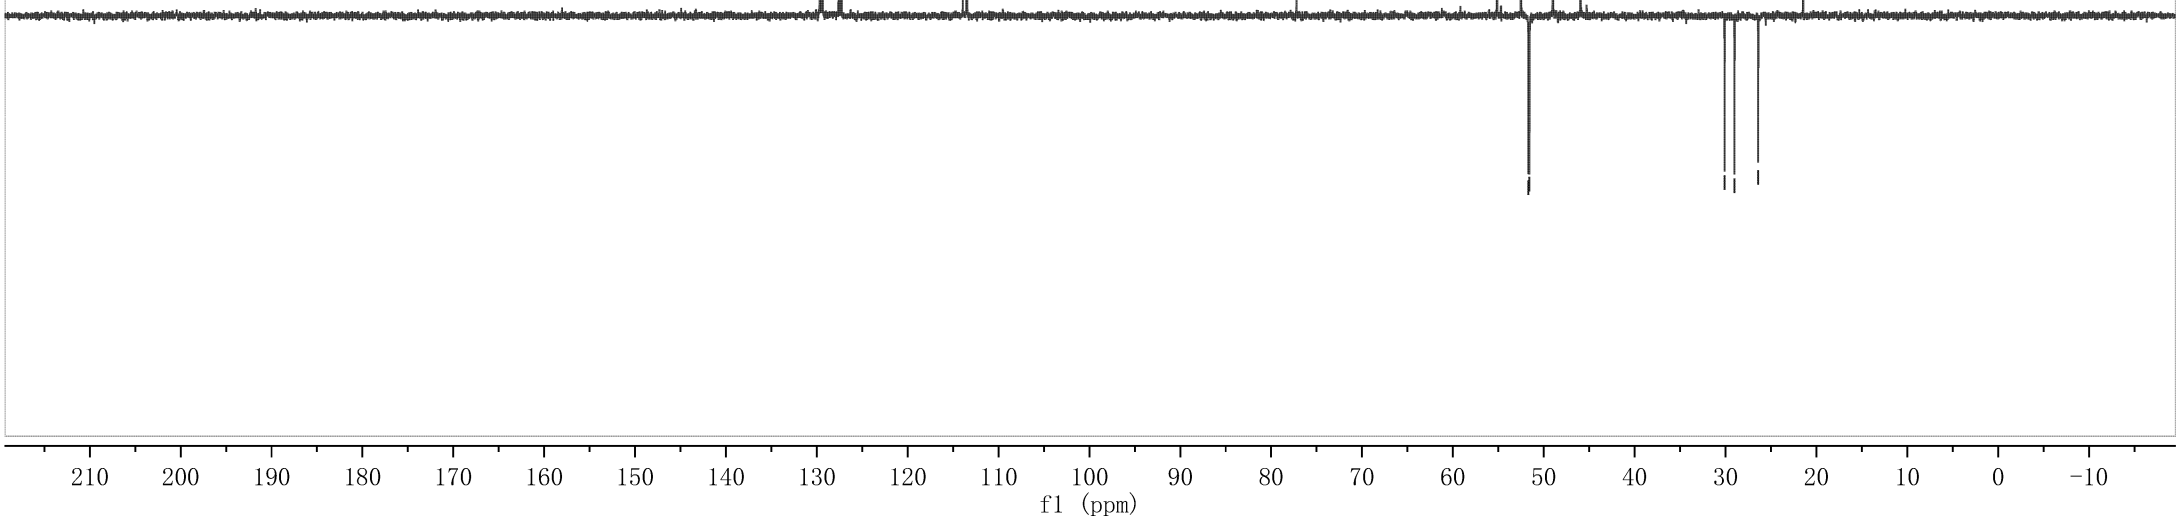

| Parameter                | Value               |
|--------------------------|---------------------|
| 1 Title                  | ZXQ-21-130          |
| 2 Origin                 | Bruker BioSpin GmbH |
| 3 Solvent                | CDC13               |
| 4 Temperature            | 298.0               |
| 5 Number of Scans        | 7                   |
| 6 Acquisition Time       | 4.0894              |
| 7 Acquisition Date       | 2020-07-09T13:53:36 |
| 8 Spectrometer Frequency | 400.13              |
| 9 Spectral Width         | 8012.8              |

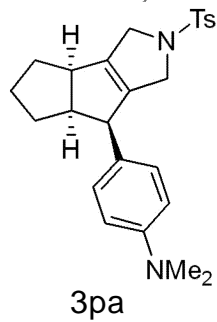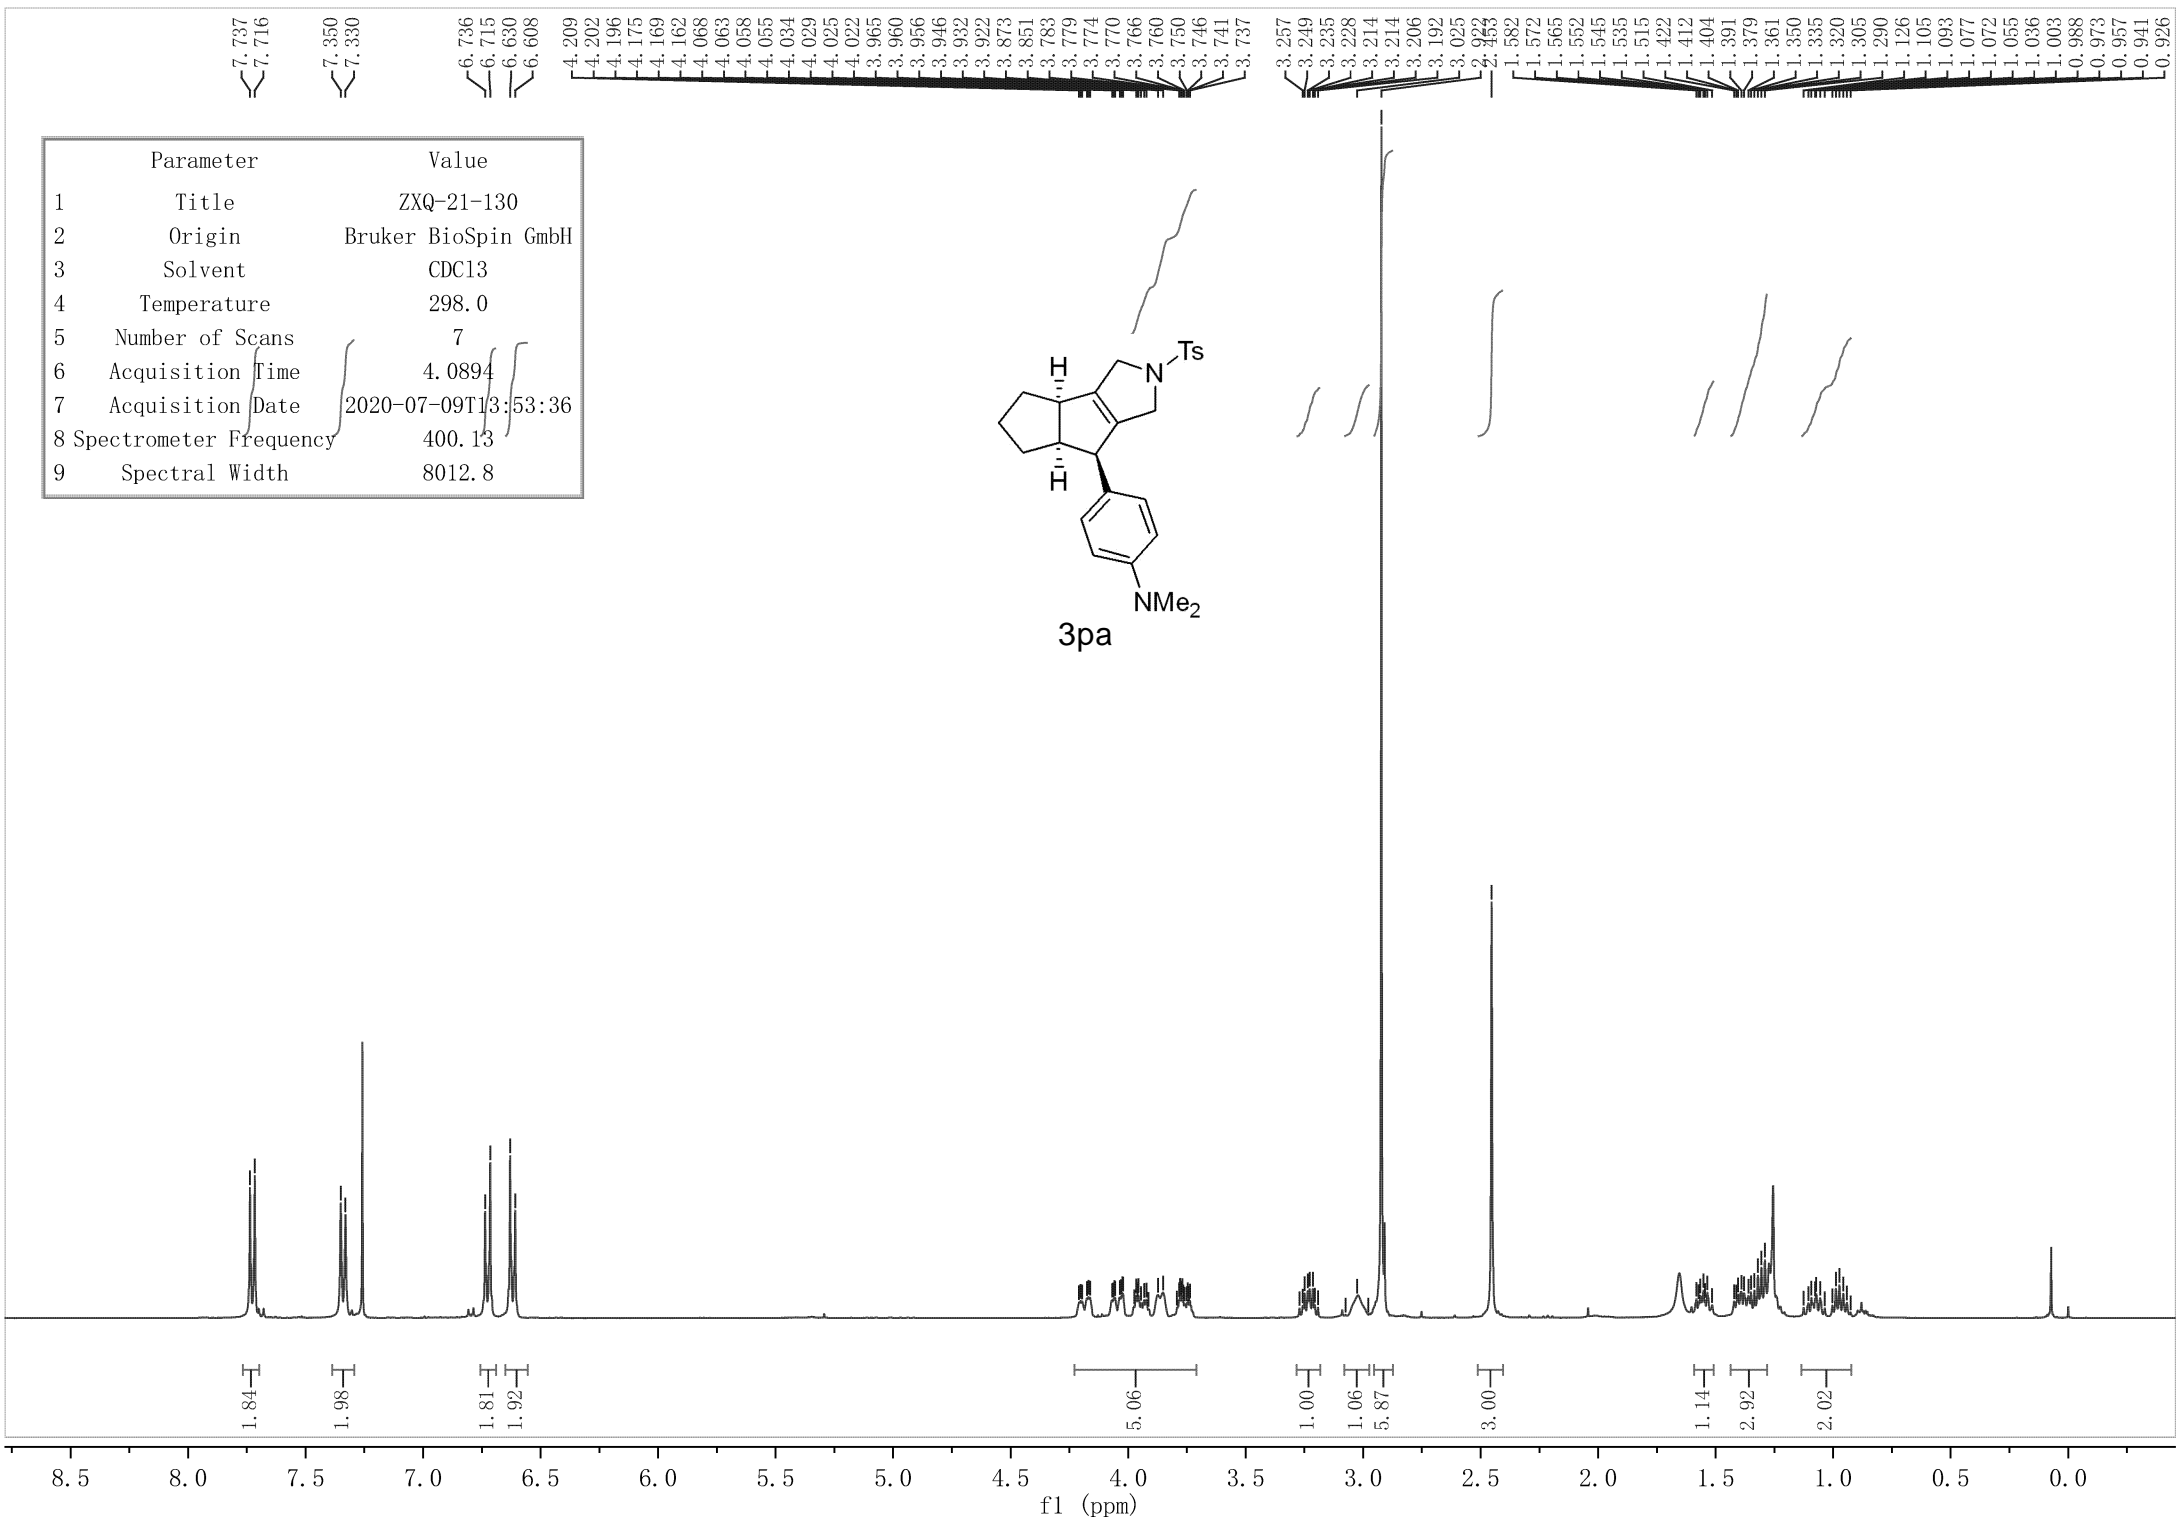

7.737  
7.716

7.350  
7.330

6.736  
6.715  
6.630  
6.608

4.209  
4.202  
4.196  
4.175  
4.169  
4.162  
4.068  
4.063  
4.055  
4.034  
4.029  
4.025  
4.022  
3.965  
3.960  
3.956  
3.946  
3.932  
3.922  
3.873  
3.851  
3.783  
3.779  
3.774  
3.770  
3.766  
3.760  
3.750  
3.746  
3.741  
3.737

3.257  
3.249  
3.235  
3.228  
3.214  
3.214  
3.206  
3.192  
3.025  
2.453  
2.452

1.582  
1.572  
1.565  
1.552  
1.545  
1.535  
1.515  
1.422  
1.412  
1.404  
1.391  
1.379  
1.361  
1.350  
1.335  
1.320  
1.305  
1.290  
1.126  
1.105  
1.093  
1.077  
1.072  
1.055  
1.036  
1.003  
0.988  
0.973  
0.957  
0.941  
0.926

| Parameter                | Value               |
|--------------------------|---------------------|
| 1 Title                  | ZXQ-21-130-C        |
| 2 Origin                 | Bruker BioSpin GmbH |
| 3 Solvent                | CDC13               |
| 4 Temperature            | 298.9               |
| 5 Number of Scans        | 64                  |
| 6 Acquisition Time       | 1.3631              |
| 7 Acquisition Date       | 2020-07-09T16:46:11 |
| 8 Spectrometer Frequency | 100.59              |
| 9 Spectral Width         | 24038.5             |

149.16 144.44 143.24 141.29  
 134.59 129.67 129.16 127.67 127.45  
 112.38  
 77.32 77.00 76.68  
 52.64 51.85 51.65 49.00 45.99 40.65  
 30.22 29.08 26.46 21.52

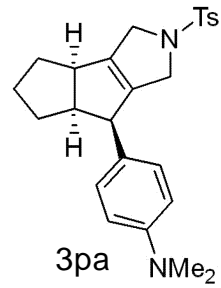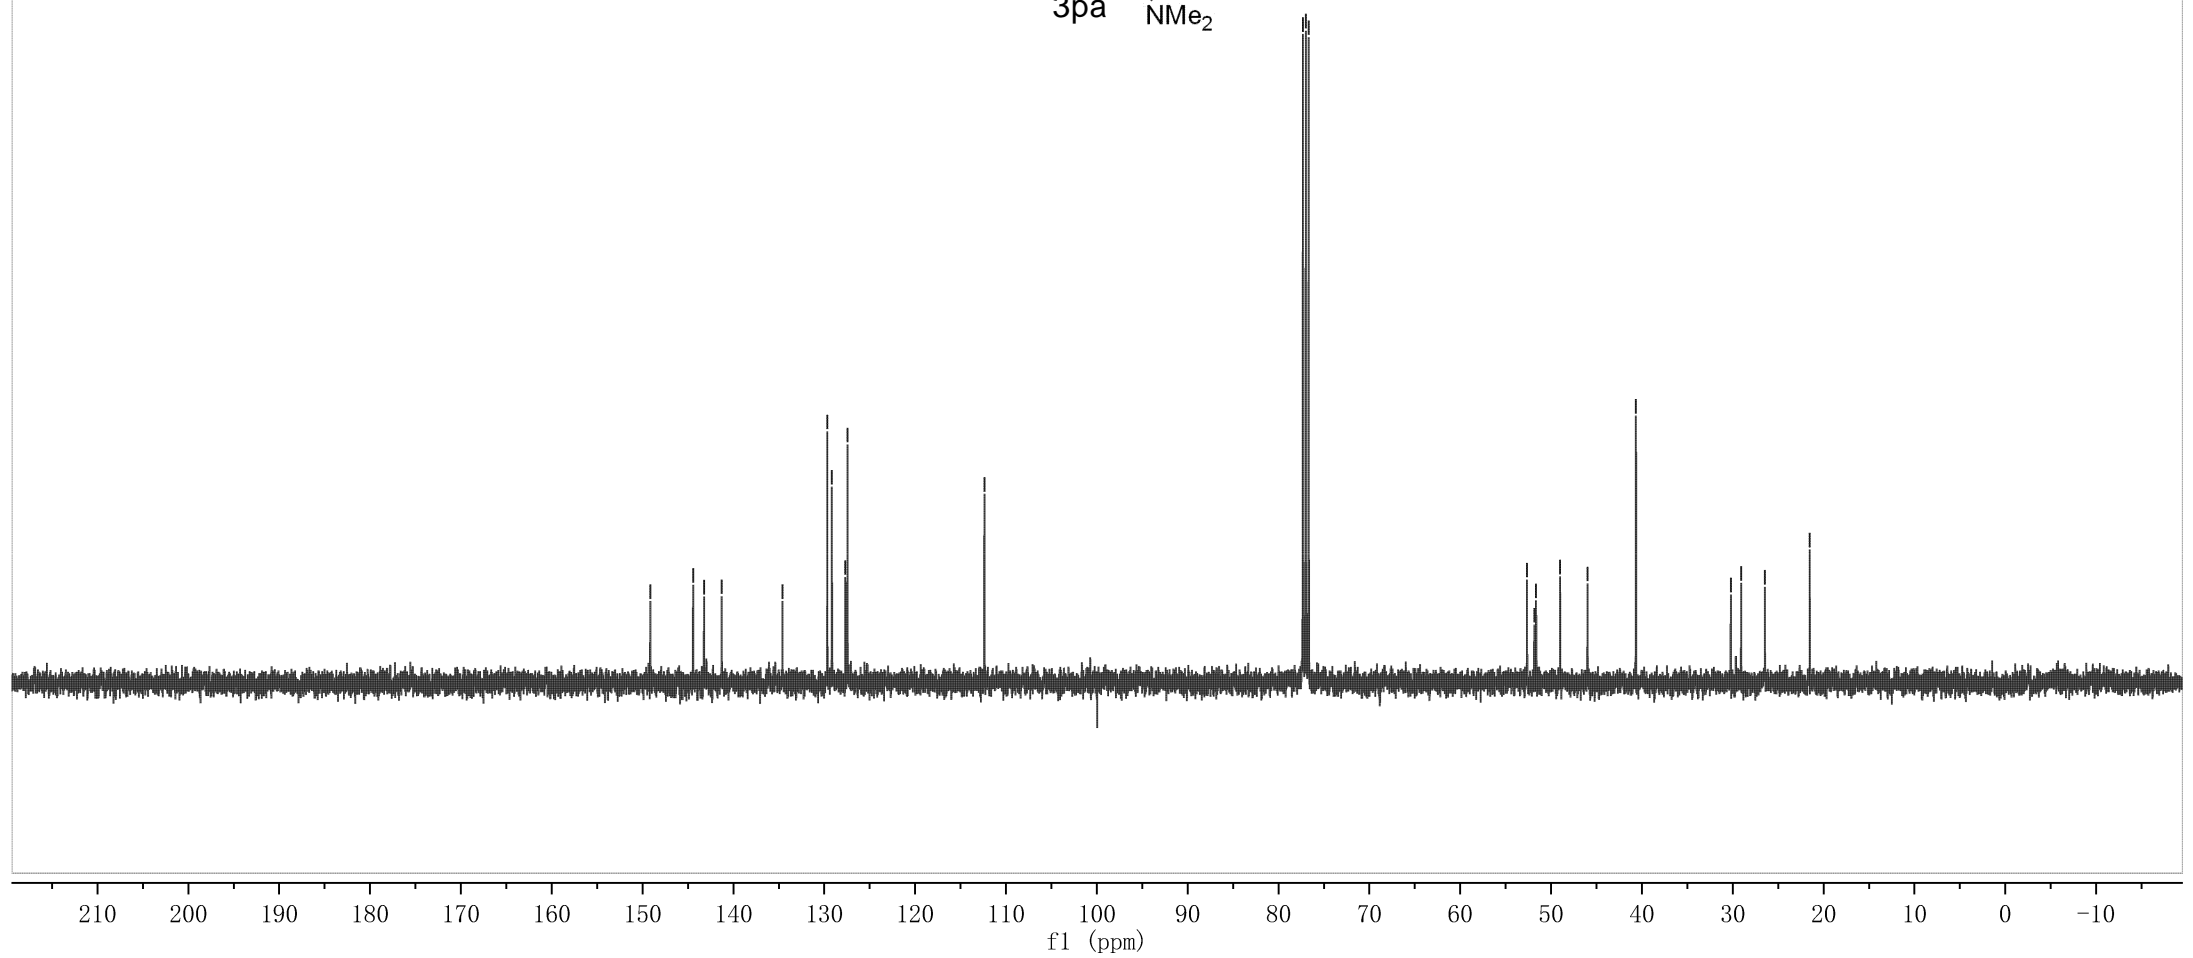

| Parameter                | Value               |
|--------------------------|---------------------|
| 1 Title                  | ZXQ-21-130-C-DEPT   |
| 2 Origin                 | Bruker BioSpin GmbH |
| 3 Solvent                | CDC13               |
| 4 Temperature            | 298.9               |
| 5 Number of Scans        | 17                  |
| 6 Acquisition Time       | 1.3631              |
| 7 Acquisition Date       | 2020-07-09T16:50:15 |
| 8 Spectrometer Frequency | 100.59              |
| 9 Spectral Width         | 24038.5             |

129.67  
129.16  
127.45

112.38

52.64  
51.85  
51.65  
49.00  
45.99  
40.65

30.22  
29.08  
26.46  
21.52

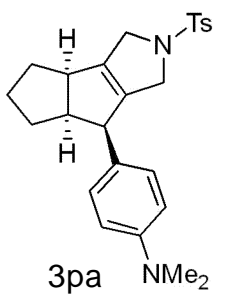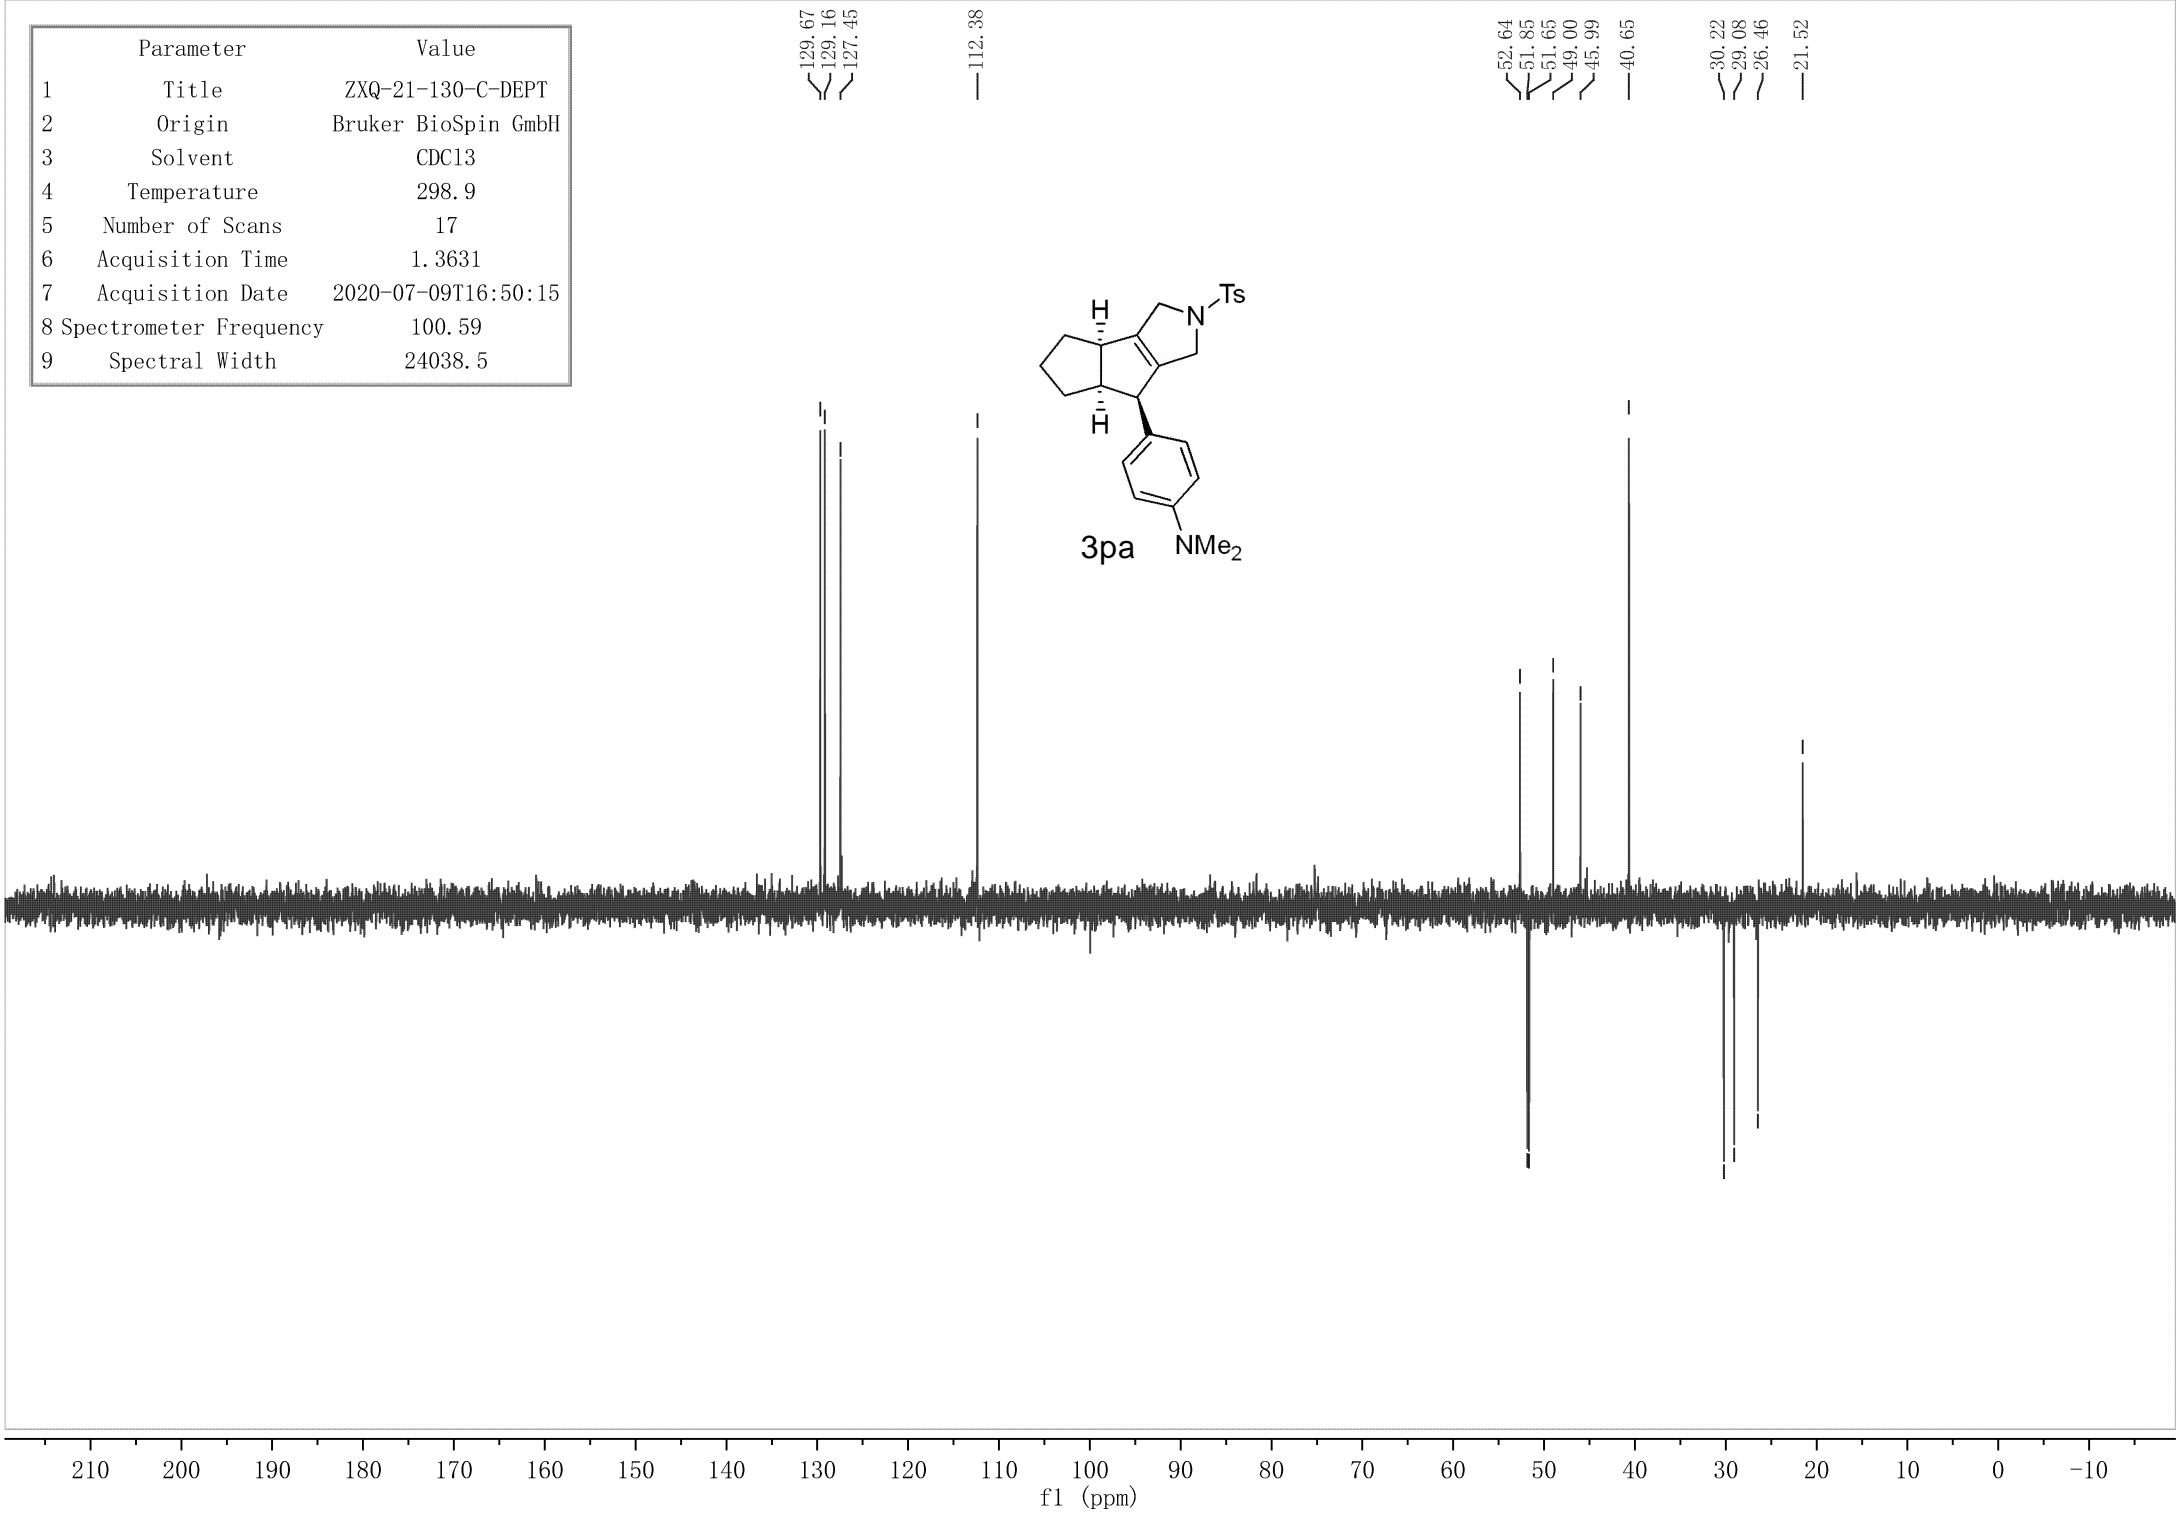

7.731  
7.710  
7.281  
7.261  
7.140  
7.119  
6.841  
6.834  
6.829  
6.818  
6.813  
6.787  
6.783  
6.779

4.397  
4.377

3.793  
3.410  
3.400  
3.391  
3.383  
3.372  
3.372  
3.364  
3.218  
3.198  
3.178  
3.157  
3.137

2.398

2.006  
1.994  
1.982  
1.974  
1.961

1.669  
1.660  
1.651  
1.638  
1.463  
1.450  
1.446  
1.432  
1.423  
1.420  
1.401  
1.385  
1.382  
1.379  
1.375  
1.363  
1.092  
1.077  
1.059  
1.043  
1.039  
1.017  
0.999  
0.985  
0.967

| Parameter                | Value               |
|--------------------------|---------------------|
| 1 Title                  | ZXQ-19-202          |
| 2 Origin                 | Bruker BioSpin GmbH |
| 3 Solvent                | CDC13               |
| 4 Temperature            | 298.0               |
| 5 Number of Scans        | 5                   |
| 6 Acquisition Time       | 4.0894              |
| 7 Acquisition Date       | 2020-01-02T20:15:53 |
| 8 Spectrometer Frequency | 400.13              |
| 9 Spectral Width         | 8012.8              |

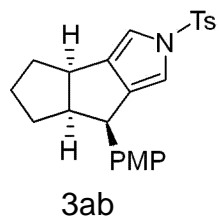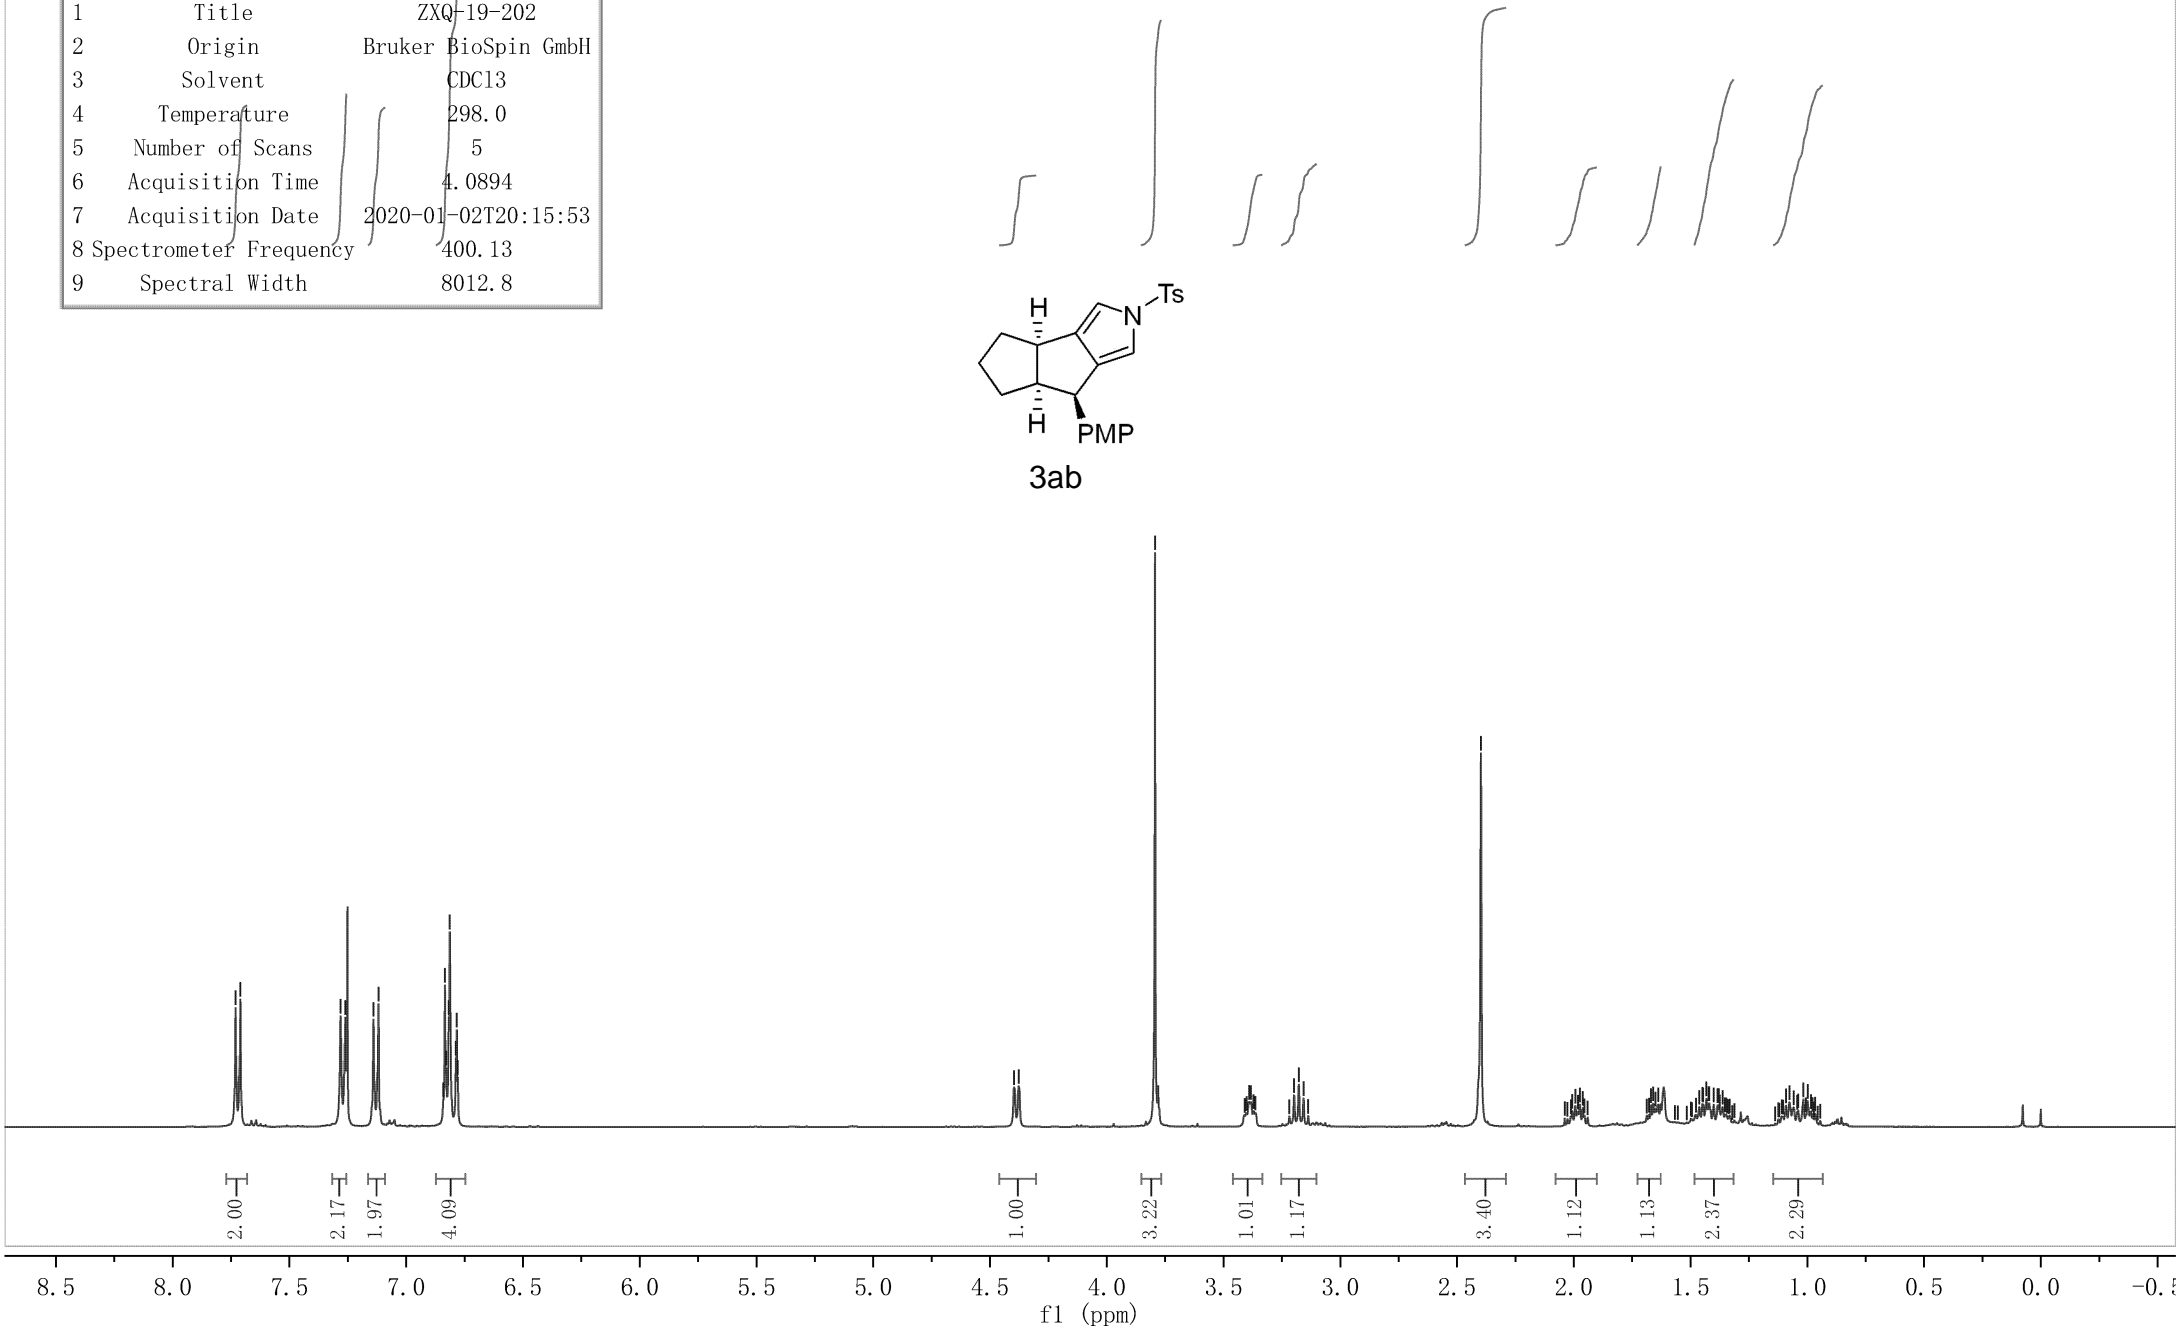

| Parameter                | Value               |
|--------------------------|---------------------|
| 1 Title                  | ZXQ-19-202-C        |
| 2 Origin                 | Bruker BioSpin GmbH |
| 3 Solvent                | CDC13               |
| 4 Temperature            | 300.0               |
| 5 Number of Scans        | 37                  |
| 6 Acquisition Time       | 1.3631              |
| 7 Acquisition Date       | 2020-01-03T15:48:48 |
| 8 Spectrometer Frequency | 100.61              |
| 9 Spectral Width         | 24038.5             |

158.05  
 144.44  
 141.37  
 137.25  
 136.57  
 132.97  
 129.76  
 129.06  
 126.66  
 113.47  
 112.36  
 77.32  
 77.00  
 76.68  
 56.99  
 55.20  
 45.95  
 42.28  
 33.15  
 28.63  
 26.63  
 21.55

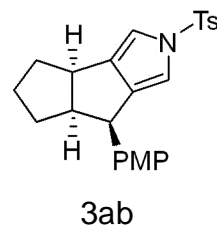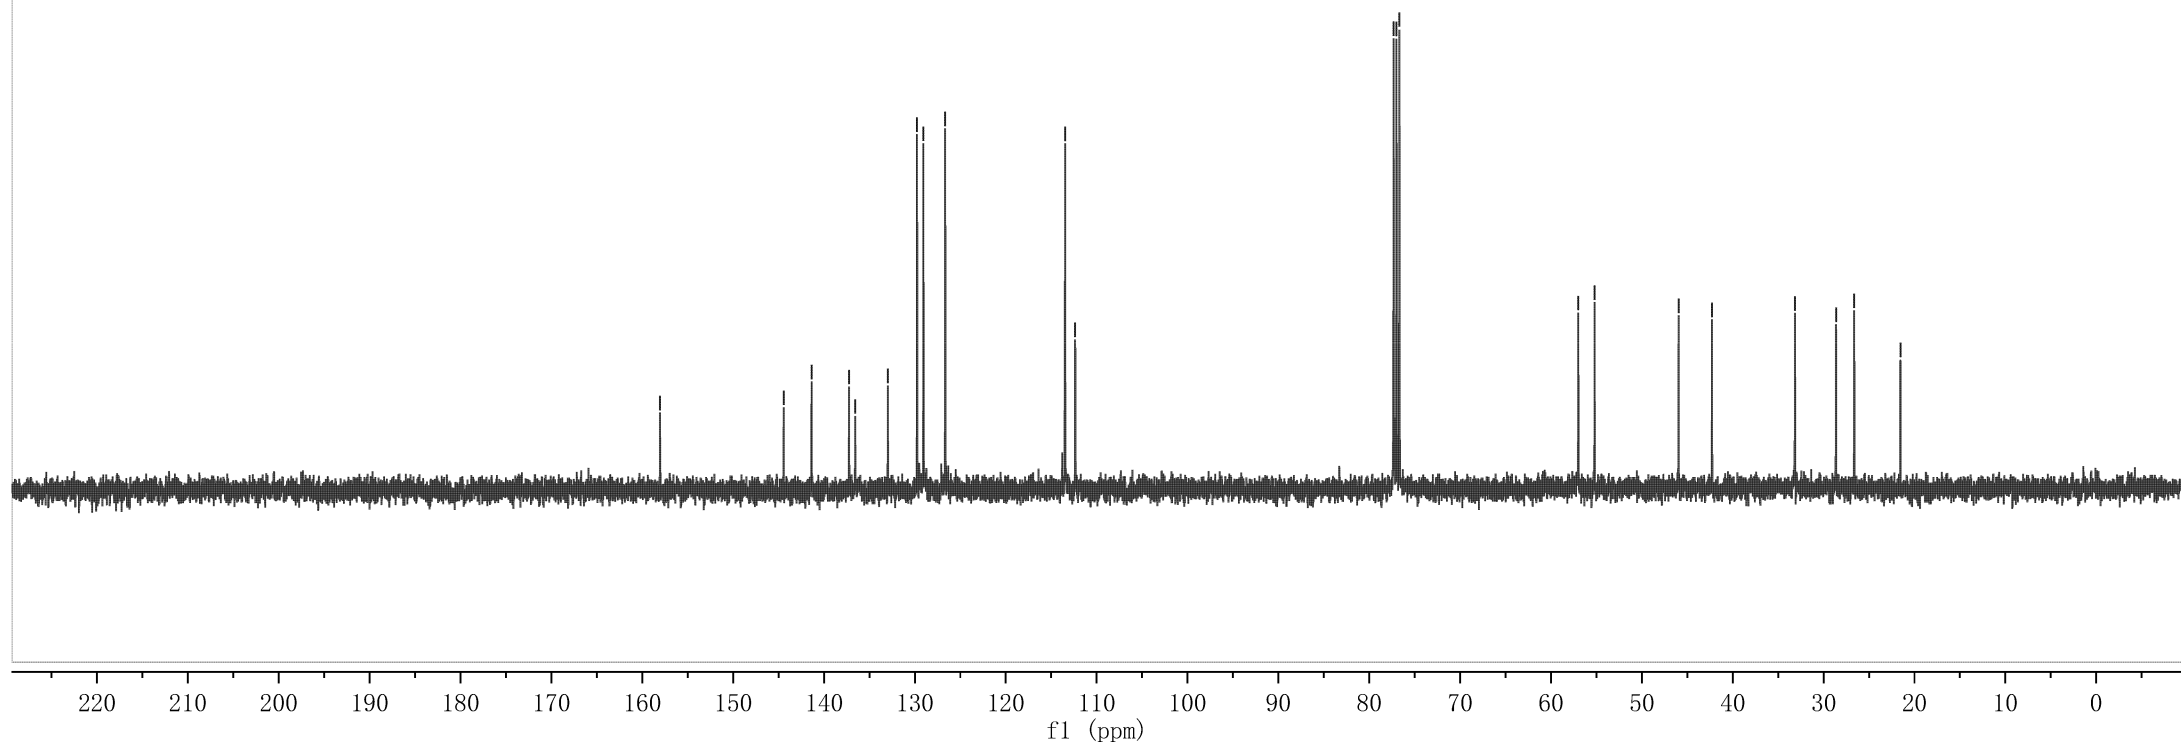

| Parameter                | Value               |
|--------------------------|---------------------|
| 1 Title                  | ZXQ-19-202-C-DEPT   |
| 2 Origin                 | Bruker BioSpin GmbH |
| 3 Solvent                | CDC13               |
| 4 Temperature            | 300.0               |
| 5 Number of Scans        | 12                  |
| 6 Acquisition Time       | 1.3631              |
| 7 Acquisition Date       | 2020-01-03T15:51:47 |
| 8 Spectrometer Frequency | 100.61              |
| 9 Spectral Width         | 24038.5             |

129.76  
129.07  
126.66

113.47  
112.36

57.00  
55.20

45.96  
42.29

33.15  
28.63  
26.63

21.55

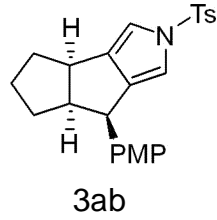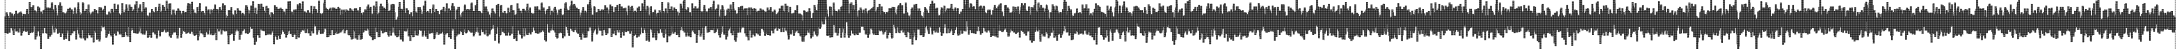

210 200 190 180 170 160 150 140 130 120 110 100 90 80 70 60 50 40 30 20 10 0 -10

f1 (ppm)

| Parameter                | Value               |
|--------------------------|---------------------|
| 1 Title                  | ZXQ-21-113-1        |
| 2 Origin                 | Bruker BioSpin GmbH |
| 3 Solvent                | CDC13               |
| 4 Temperature            | 298.0               |
| 5 Number of Scans        | 6                   |
| 6 Acquisition Time       | 4.0894              |
| 7 Acquisition Date       | 2020-07-06T14:38:47 |
| 8 Spectrometer Frequency | 400.13              |
| 9 Spectral Width         | 8012.8              |

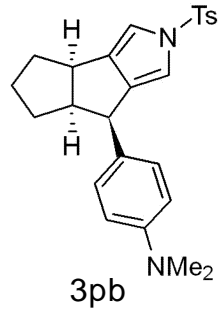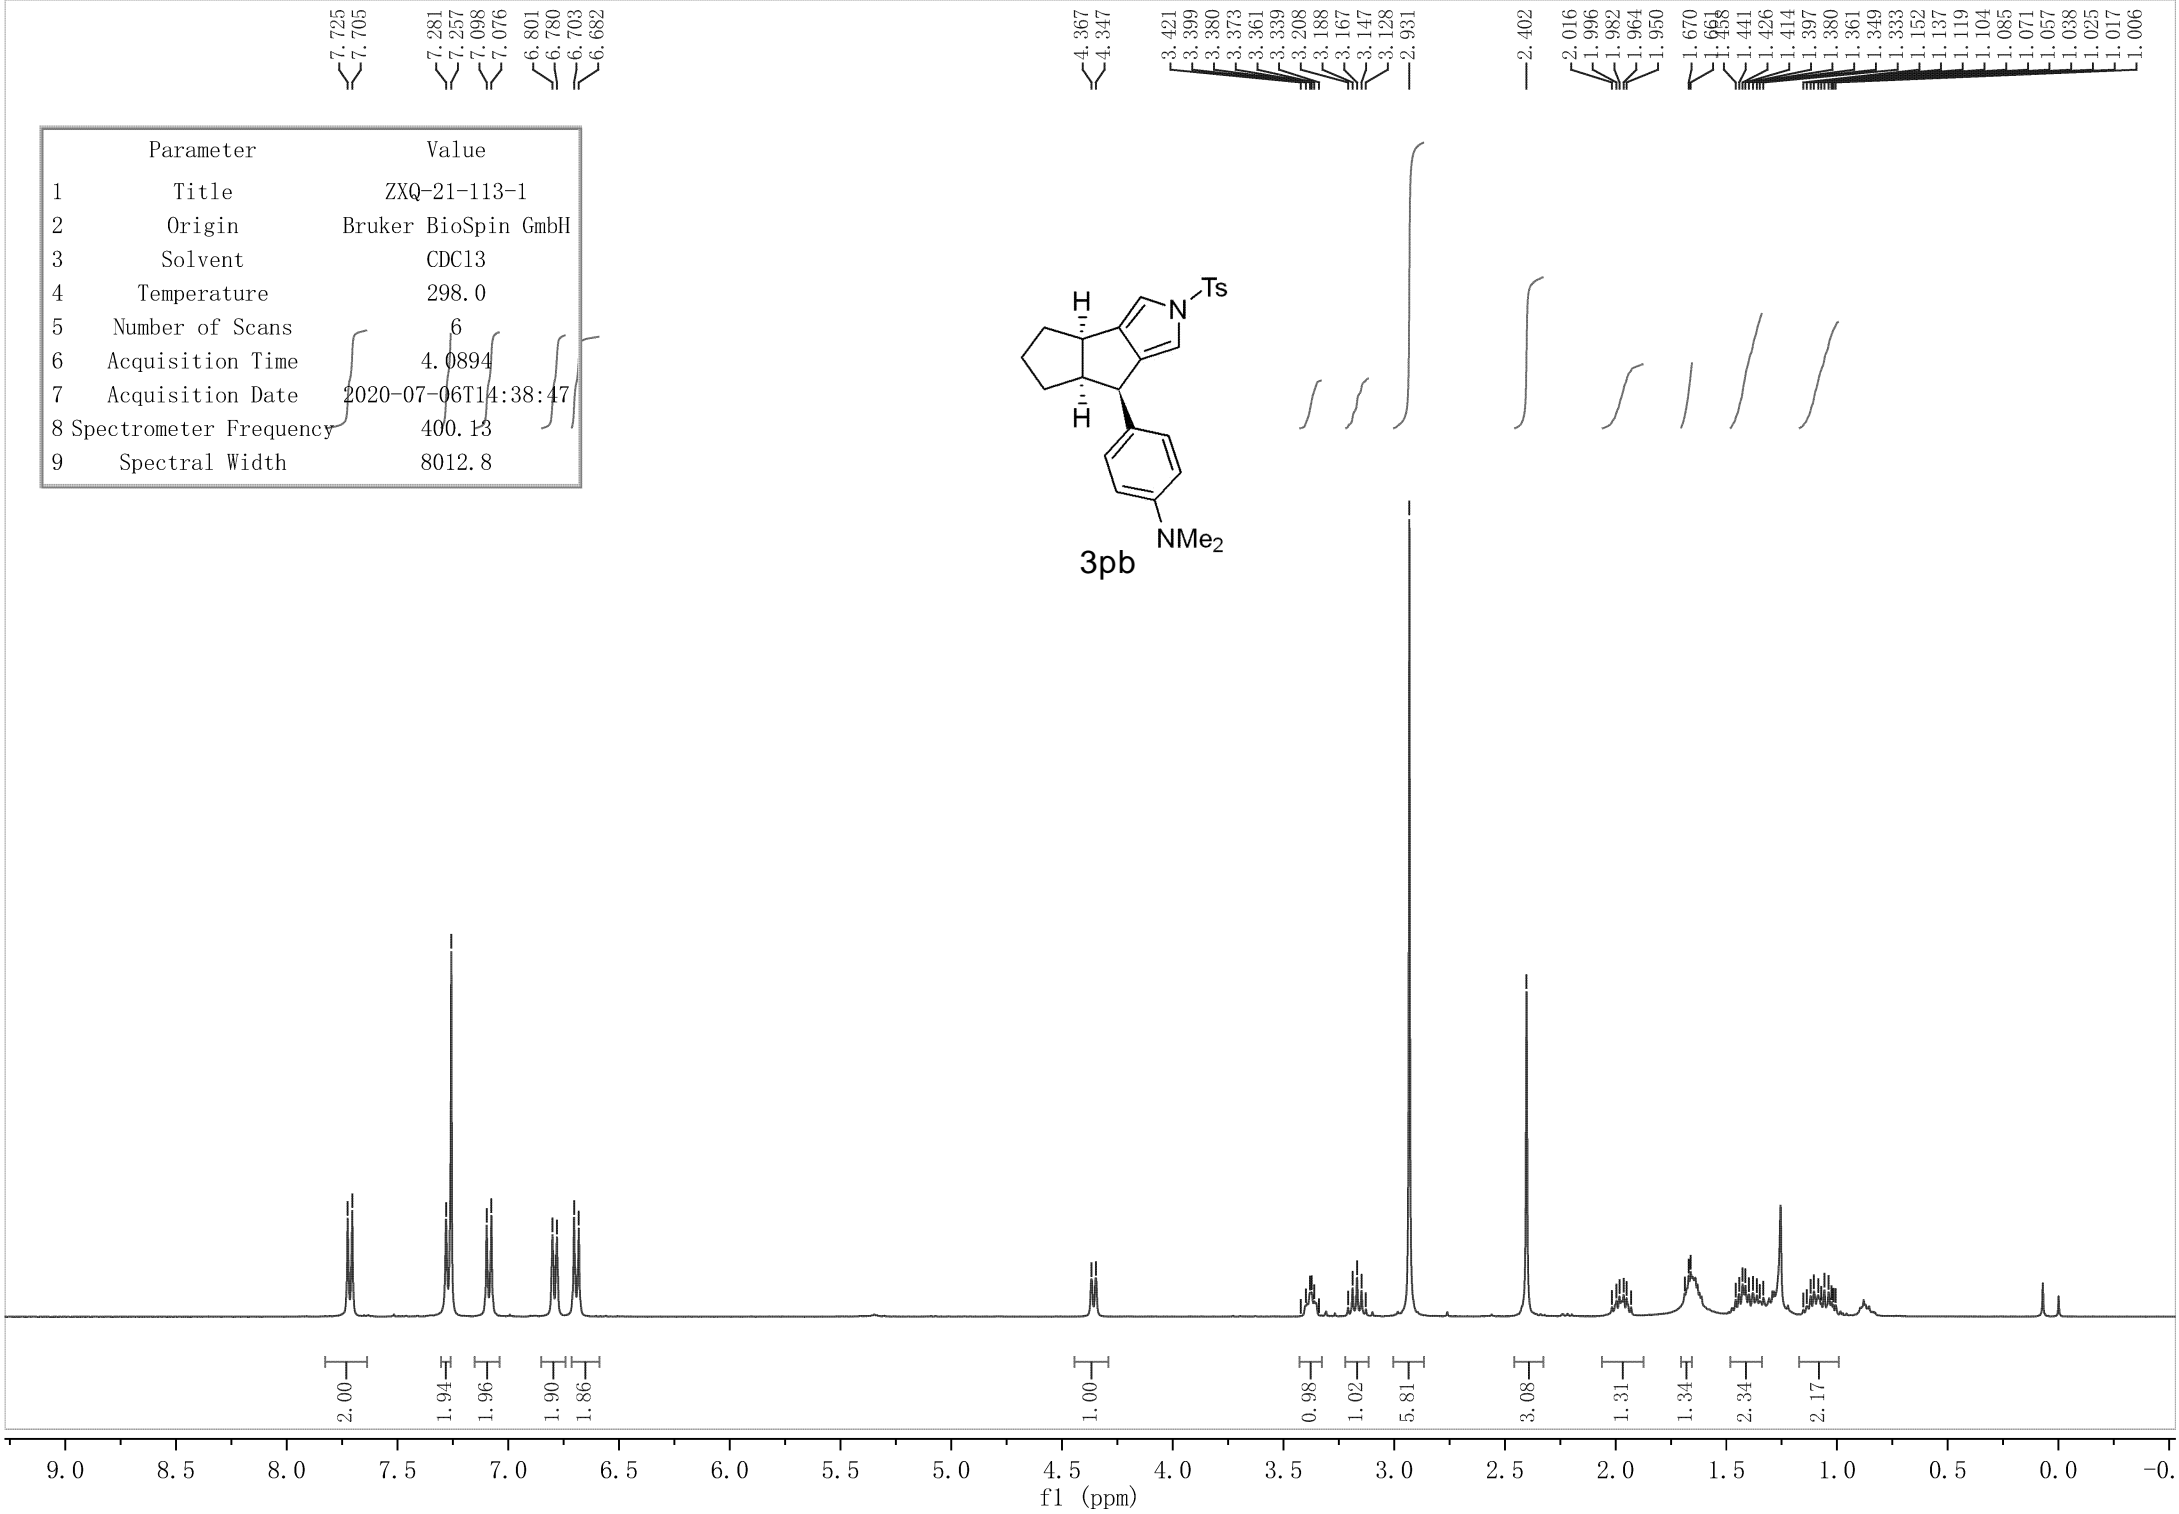



| Parameter                | Value               |
|--------------------------|---------------------|
| 1 Title                  | ZXQ-21-113-C        |
| 2 Origin                 | Bruker BioSpin GmbH |
| 3 Solvent                | CDC13               |
| 4 Temperature            | 300.0               |
| 5 Number of Scans        | 290                 |
| 6 Acquisition Time       | 1.3631              |
| 7 Acquisition Date       | 2020-07-27T17:02:33 |
| 8 Spectrometer Frequency | 100.61              |
| 9 Spectral Width         | 24038.5             |

149.09 144.38 141.50 137.67 136.65 129.76 128.85 126.68 113.56 112.68 112.31 77.32 77.00 76.68 57.11 45.94 42.32 40.91 33.22 28.65 26.64 21.58

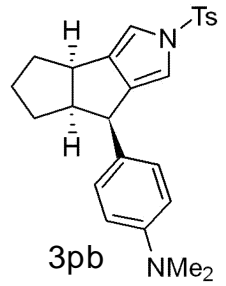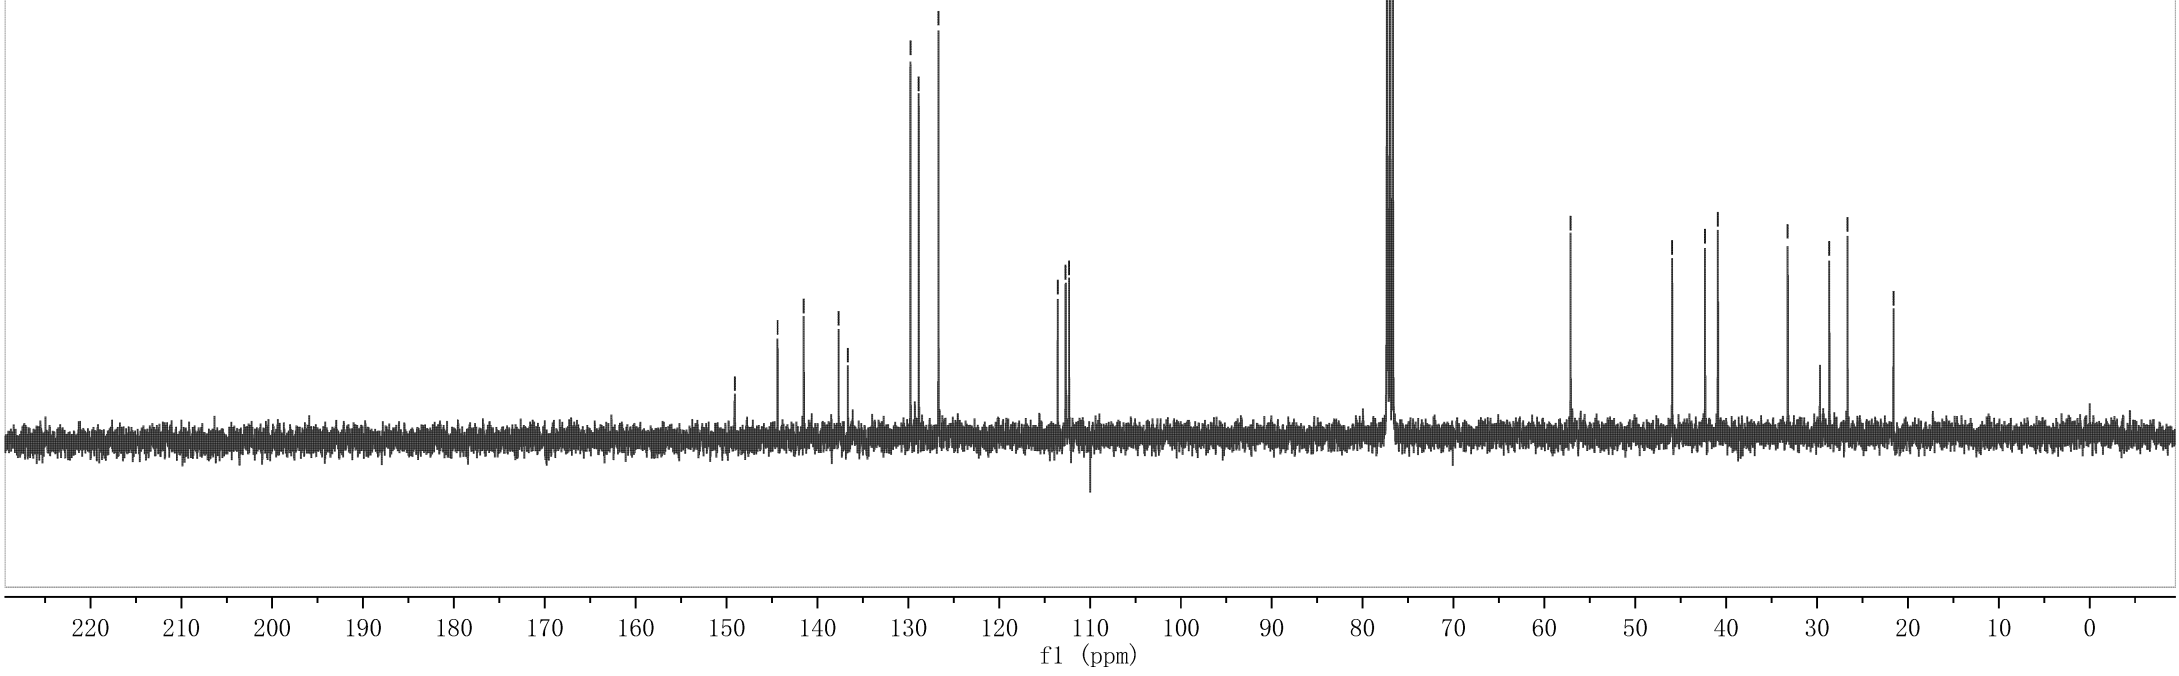

| Parameter                | Value               |
|--------------------------|---------------------|
| 1 Title                  | ZXQ-21-113-C-DEPT   |
| 2 Origin                 | Bruker BioSpin GmbH |
| 3 Solvent                | CDC13               |
| 4 Temperature            | 300.0               |
| 5 Number of Scans        | 53                  |
| 6 Acquisition Time       | 1.3631              |
| 7 Acquisition Date       | 2020-07-27T17:19:24 |
| 8 Spectrometer Frequency | 100.61              |
| 9 Spectral Width         | 24038.5             |

129.76  
128.85  
126.68

113.55  
112.68  
112.31

57.11

45.93  
42.31  
40.90

33.22  
28.65  
26.64

21.58

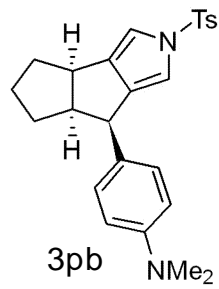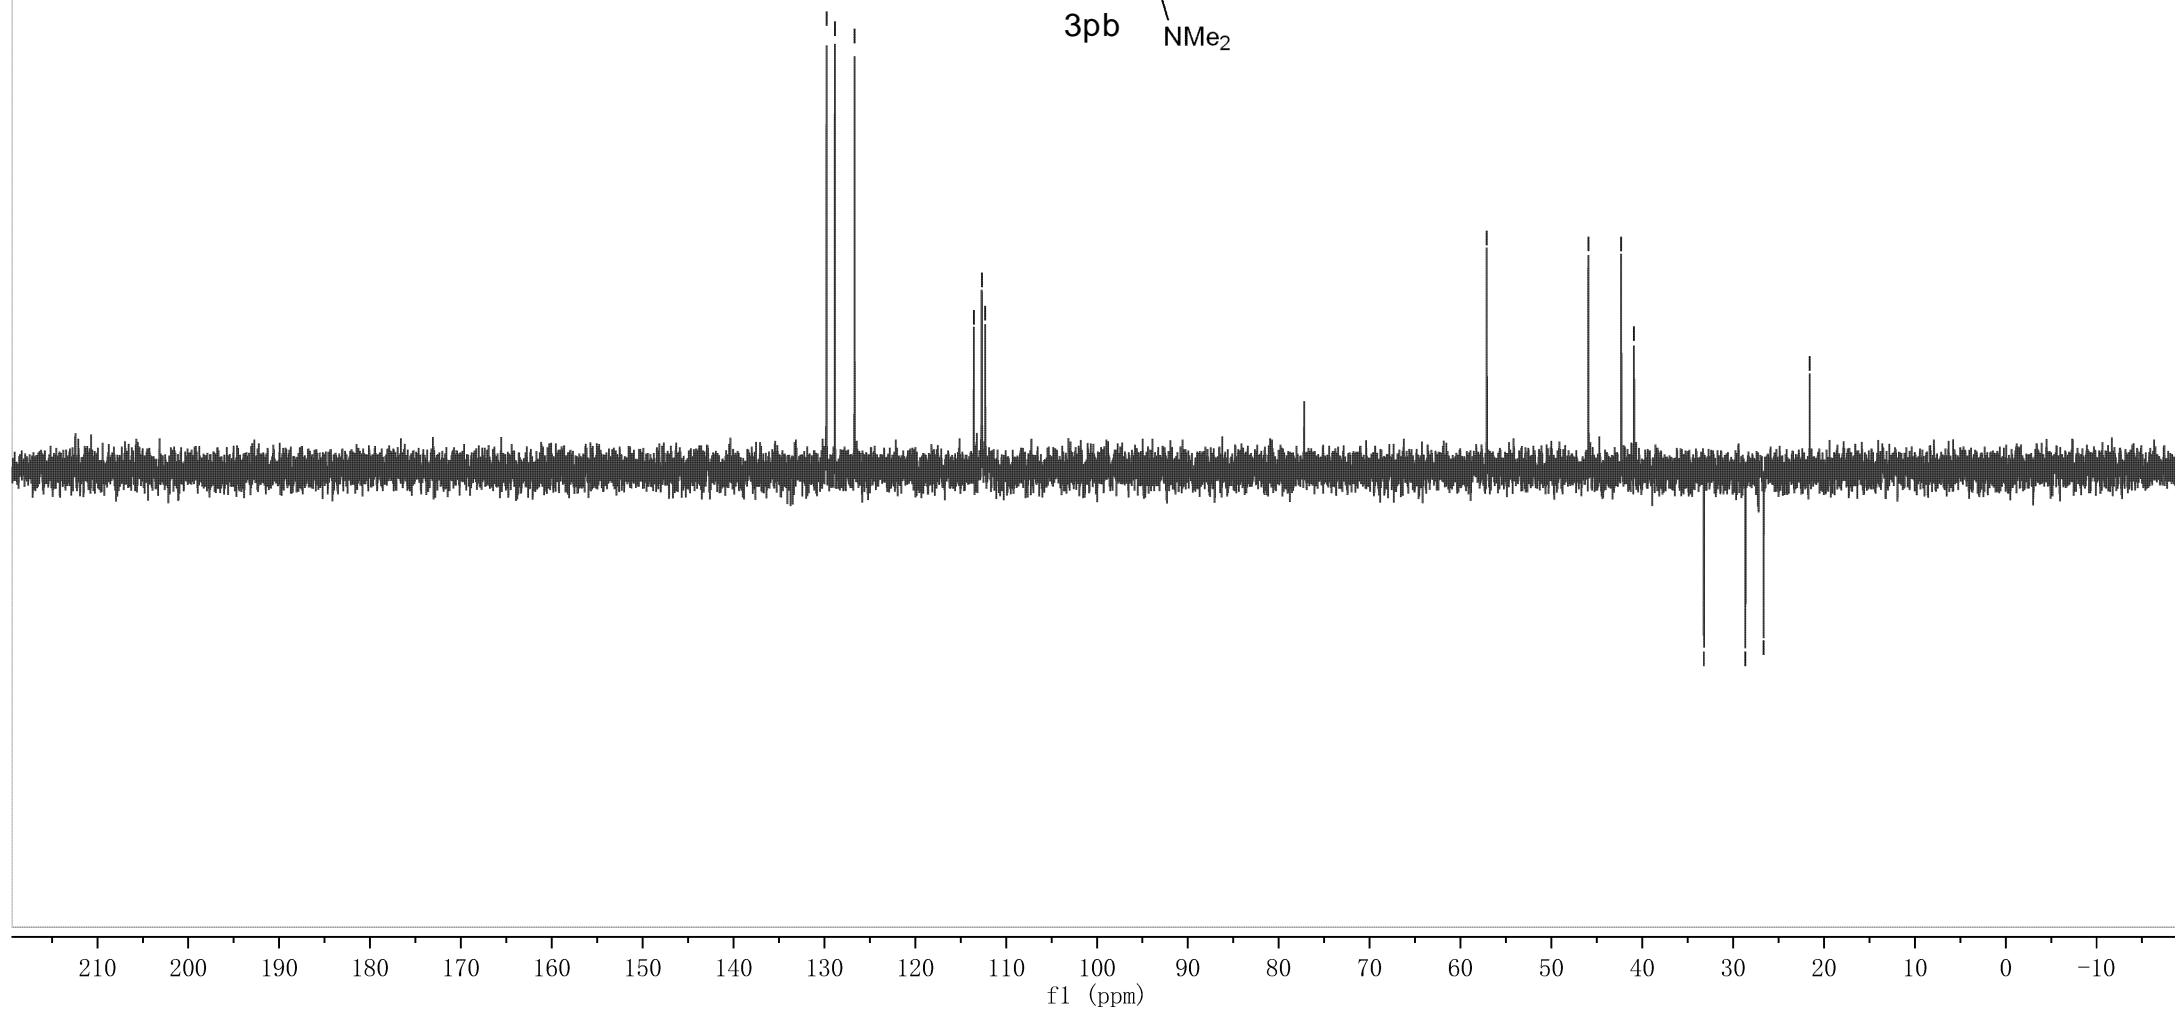

7.706  
7.686  
7.321  
7.302  
7.121  
7.101  
7.099  
6.856  
6.842  
6.837  
6.825  
6.820

3.800  
3.498  
3.397  
3.378  
3.376  
3.372  
3.211  
3.194  
3.186  
3.186  
3.176  
3.169  
3.155  
3.129  
3.129  
1.767  
1.751  
1.738  
1.719  
1.703  
1.663  
1.646  
1.635  
1.628  
1.618  
1.586  
1.561  
1.556  
1.545  
1.381  
1.371  
1.353  
1.333  
1.326  
1.310  
1.297  
1.285  
1.276  
1.167  
1.150  
1.139  
1.122  
1.108  
1.091  
1.080  
1.063

| Parameter                | Value               |
|--------------------------|---------------------|
| 1 Title                  | ZXQ-19-205-xiao     |
| 2 Origin                 | Bruker BioSpin GmbH |
| 3 Solvent                | CDC13               |
| 4 Temperature            | 298.0               |
| 5 Number of Scans        | 10                  |
| 6 Acquisition Time       | 4.0894              |
| 7 Acquisition Date       | 2020-01-03T15:32:28 |
| 8 Spectrometer Frequency | 400.13              |
| 9 Spectral Width         | 8012.8              |

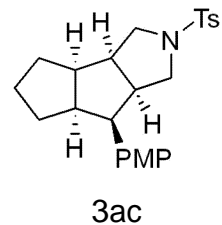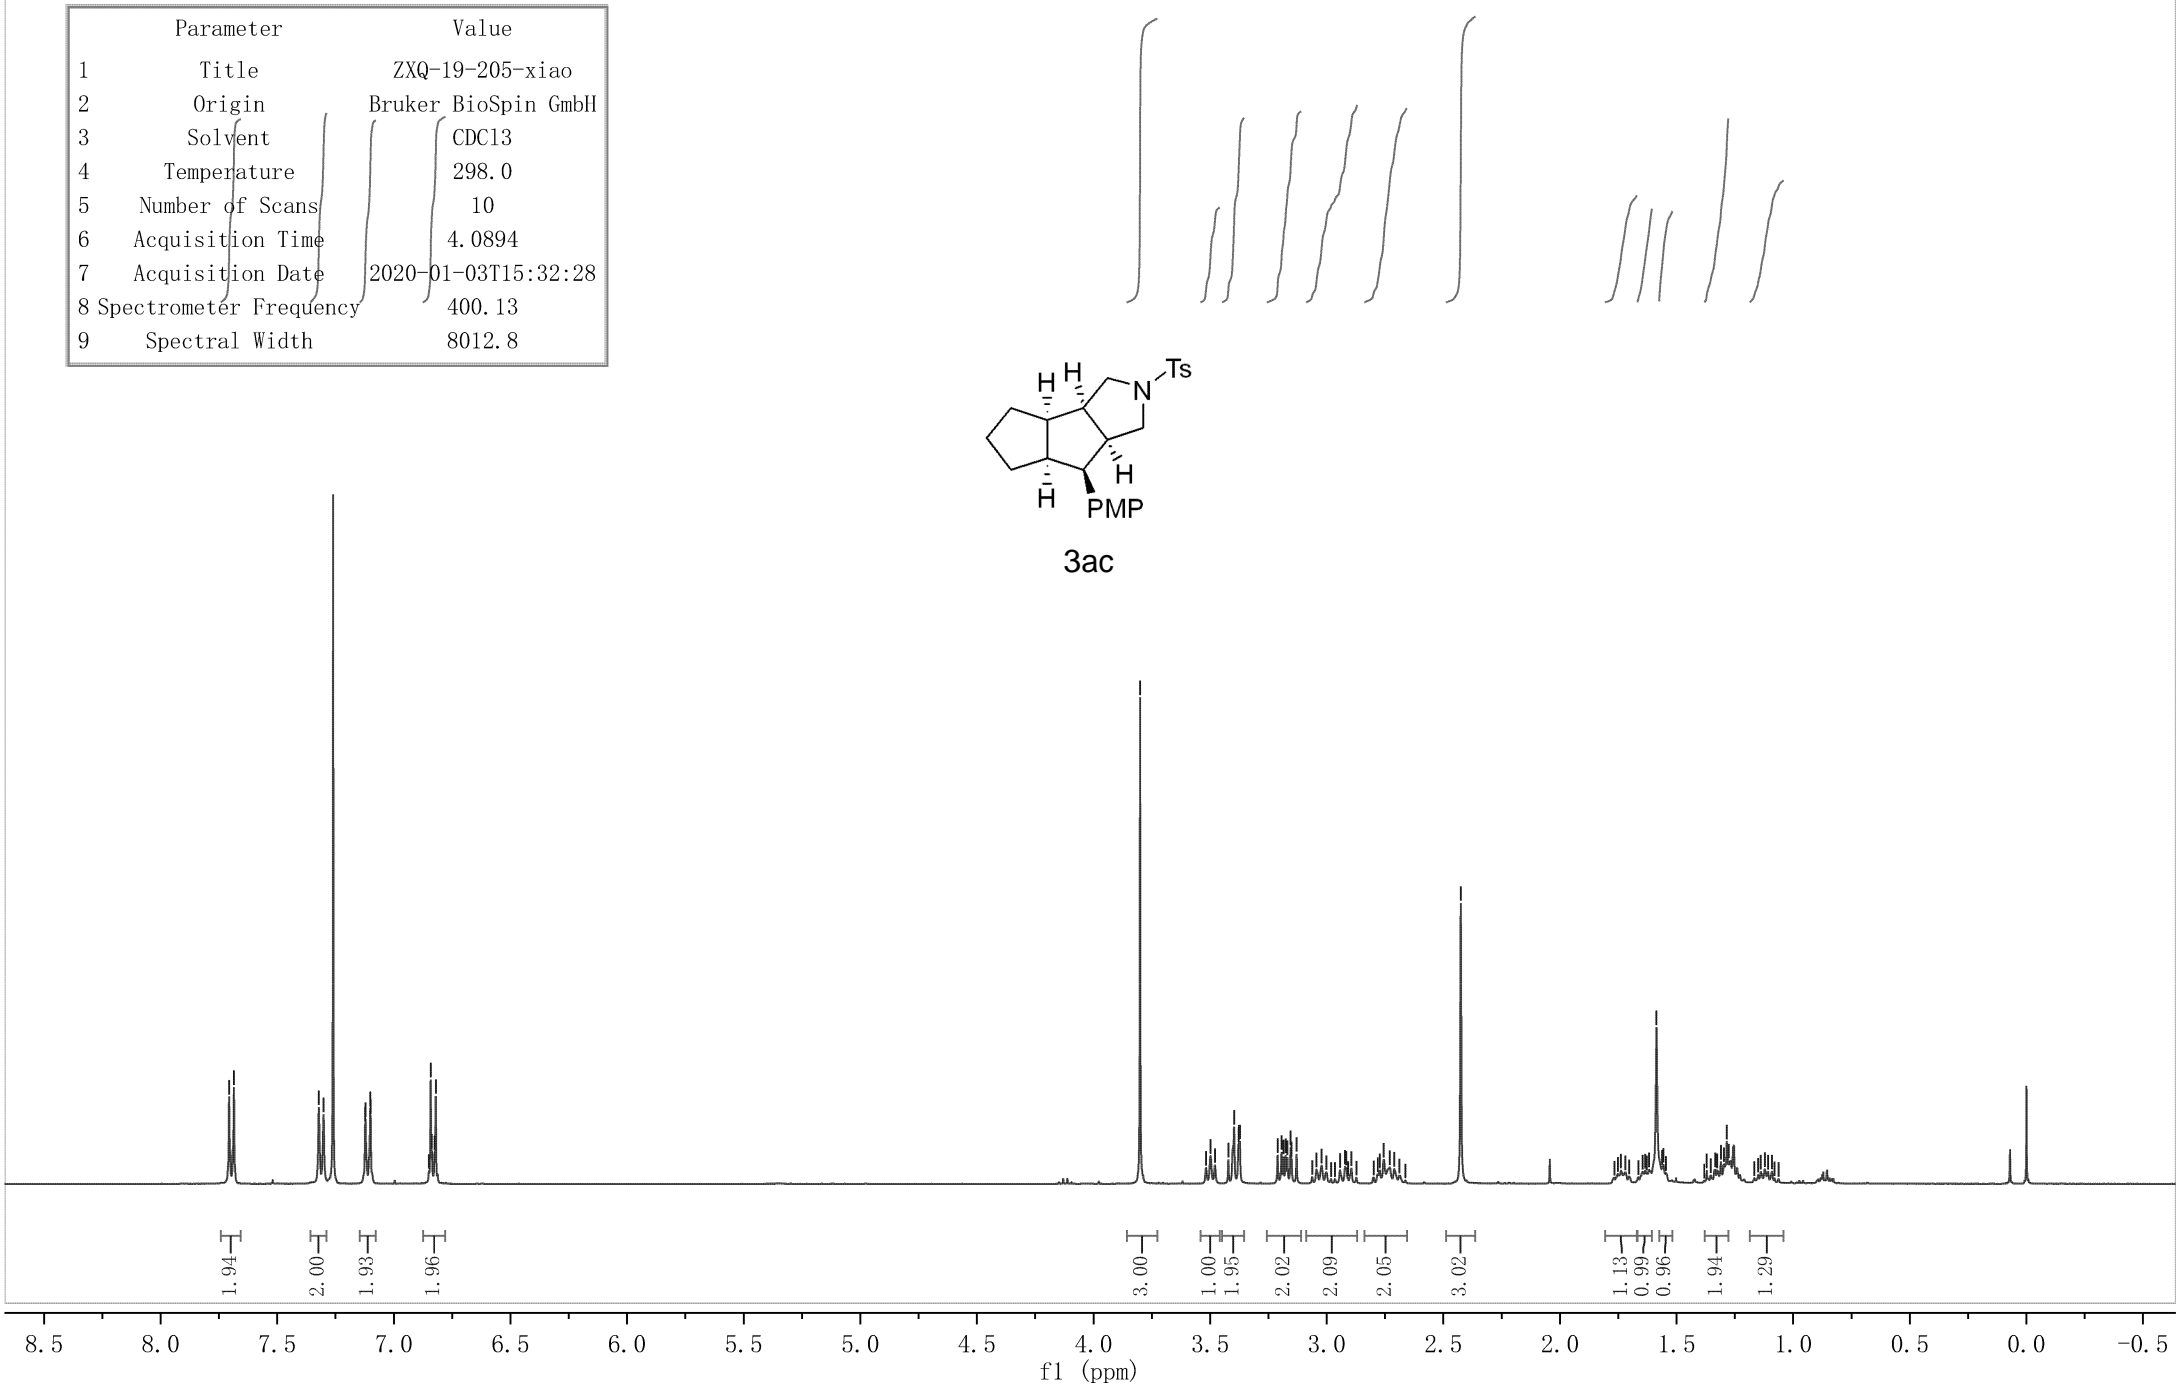

| Parameter                | Value               |
|--------------------------|---------------------|
| 1 Title                  | ZXQ-19-205-xiao-C   |
| 2 Origin                 | Bruker BioSpin GmbH |
| 3 Solvent                | CDC13               |
| 4 Temperature            | 300.0               |
| 5 Number of Scans        | 181                 |
| 6 Acquisition Time       | 1.3631              |
| 7 Acquisition Date       | 2020-01-03T15:34:06 |
| 8 Spectrometer Frequency | 100.61              |
| 9 Spectral Width         | 24038.5             |

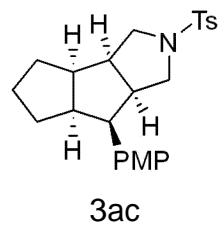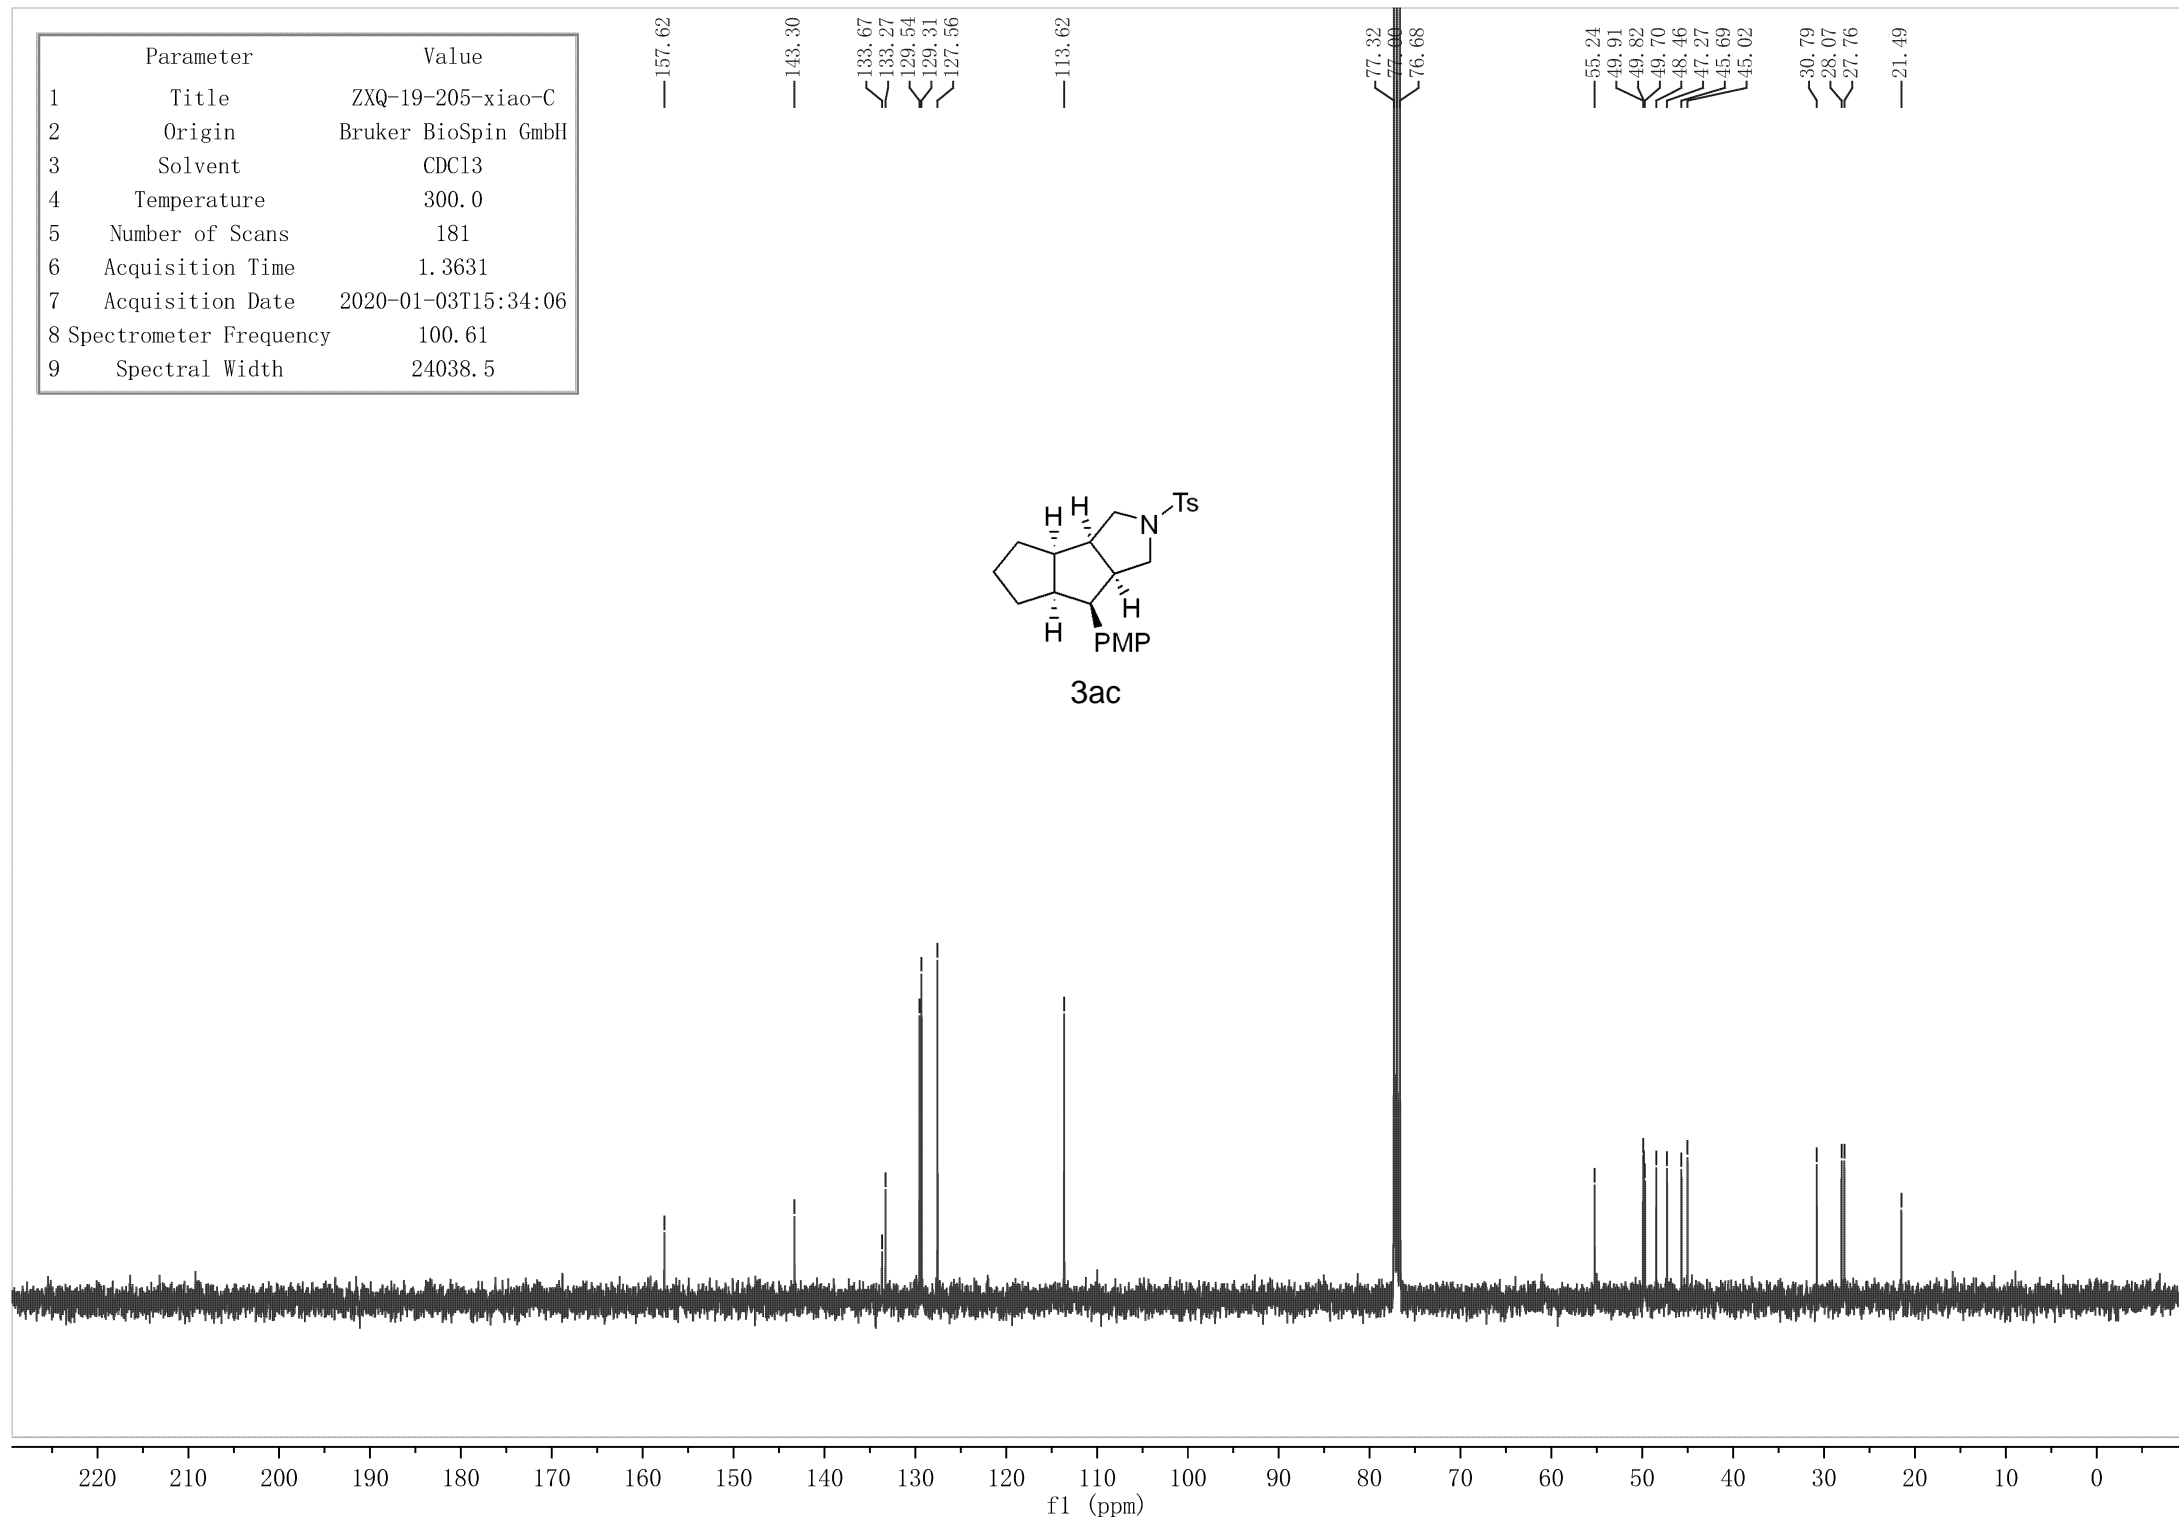

| Parameter                | Value                  |
|--------------------------|------------------------|
| 1 Title                  | ZXQ-19-205-xiao-C-DEPT |
| 2 Origin                 | Bruker BioSpin GmbH    |
| 3 Solvent                | CDC13                  |
| 4 Temperature            | 300.0                  |
| 5 Number of Scans        | 48                     |
| 6 Acquisition Time       | 1.3631                 |
| 7 Acquisition Date       | 2020-01-03T15:44:59    |
| 8 Spectrometer Frequency | 100.61                 |
| 9 Spectral Width         | 24038.5                |

129.54  
129.31  
127.56

113.62

55.24  
49.91  
49.82  
49.70  
48.46  
47.27  
45.68  
45.01

30.79  
28.07  
27.76

21.49

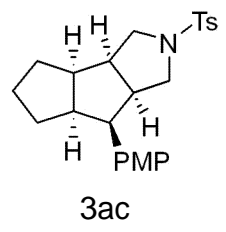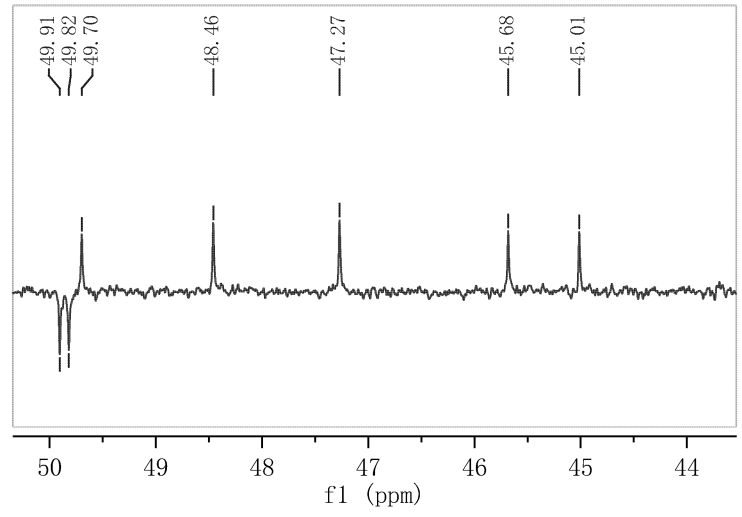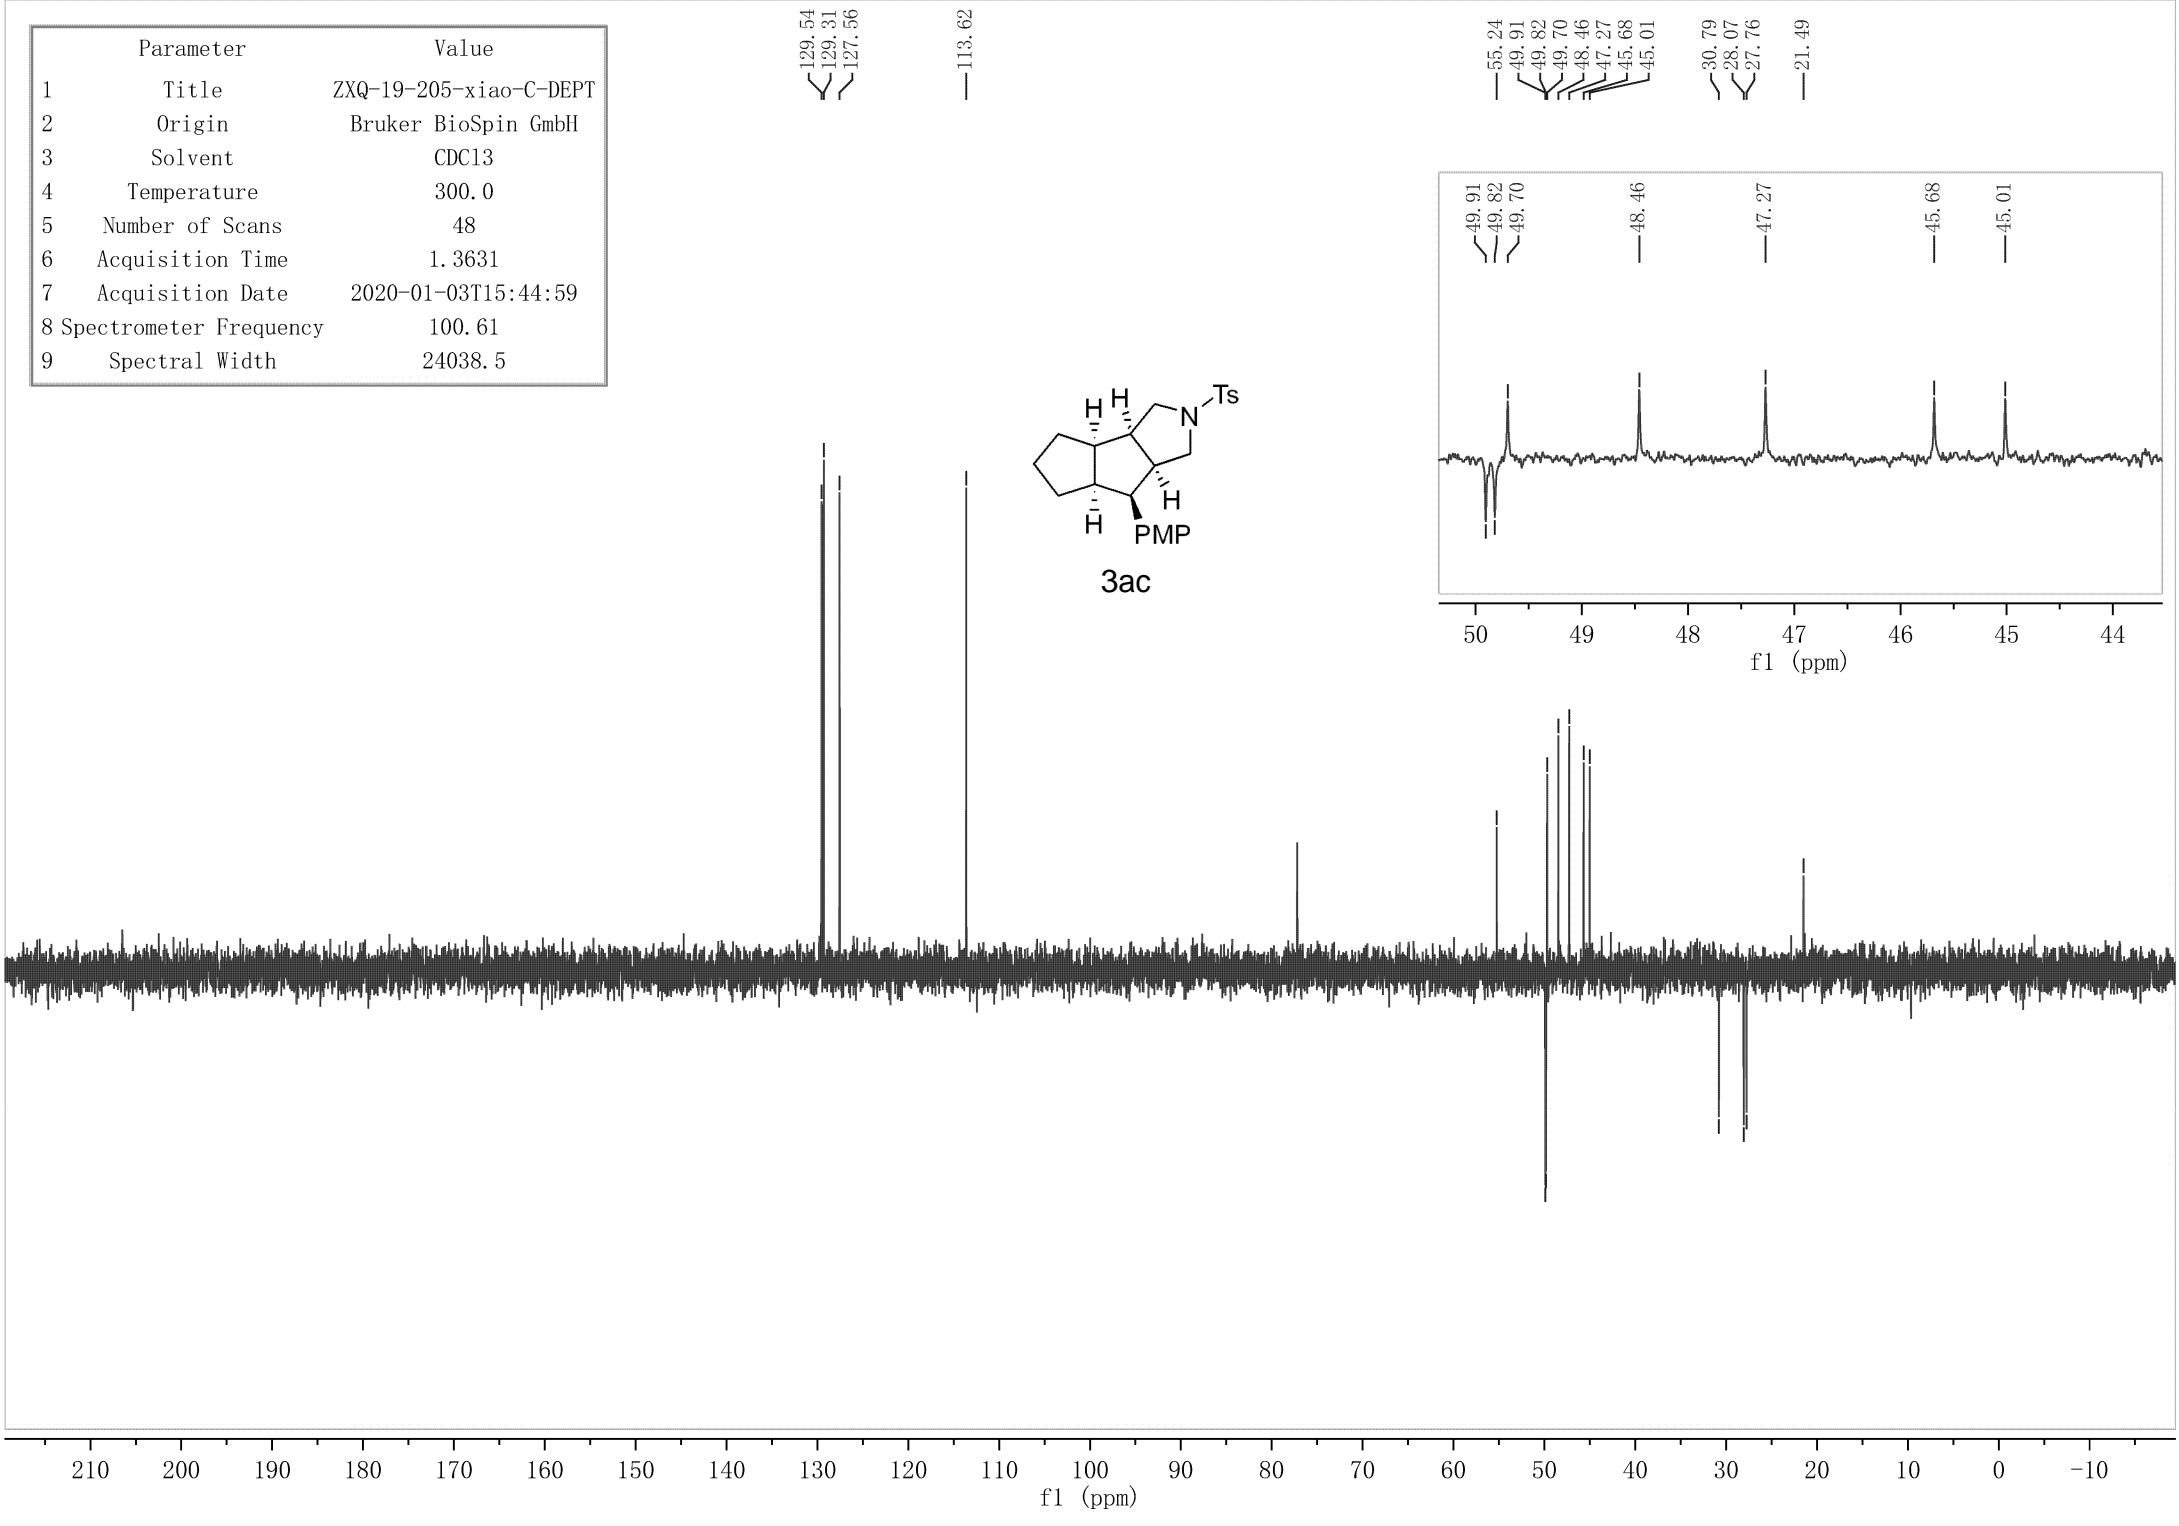

| Parameter                | Value               |
|--------------------------|---------------------|
| 1 Title                  | ZXQ-21-142          |
| 2 Origin                 | Bruker BioSpin GmbH |
| 3 Solvent                | CDC13               |
| 4 Temperature            | 298.0               |
| 5 Number of Scans        | 5                   |
| 6 Acquisition Time       | 4.0894              |
| 7 Acquisition Date       | 2020-07-15T20:08:13 |
| 8 Spectrometer Frequency | 400.13              |
| 9 Spectral Width         | 8012.8              |

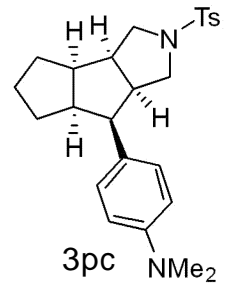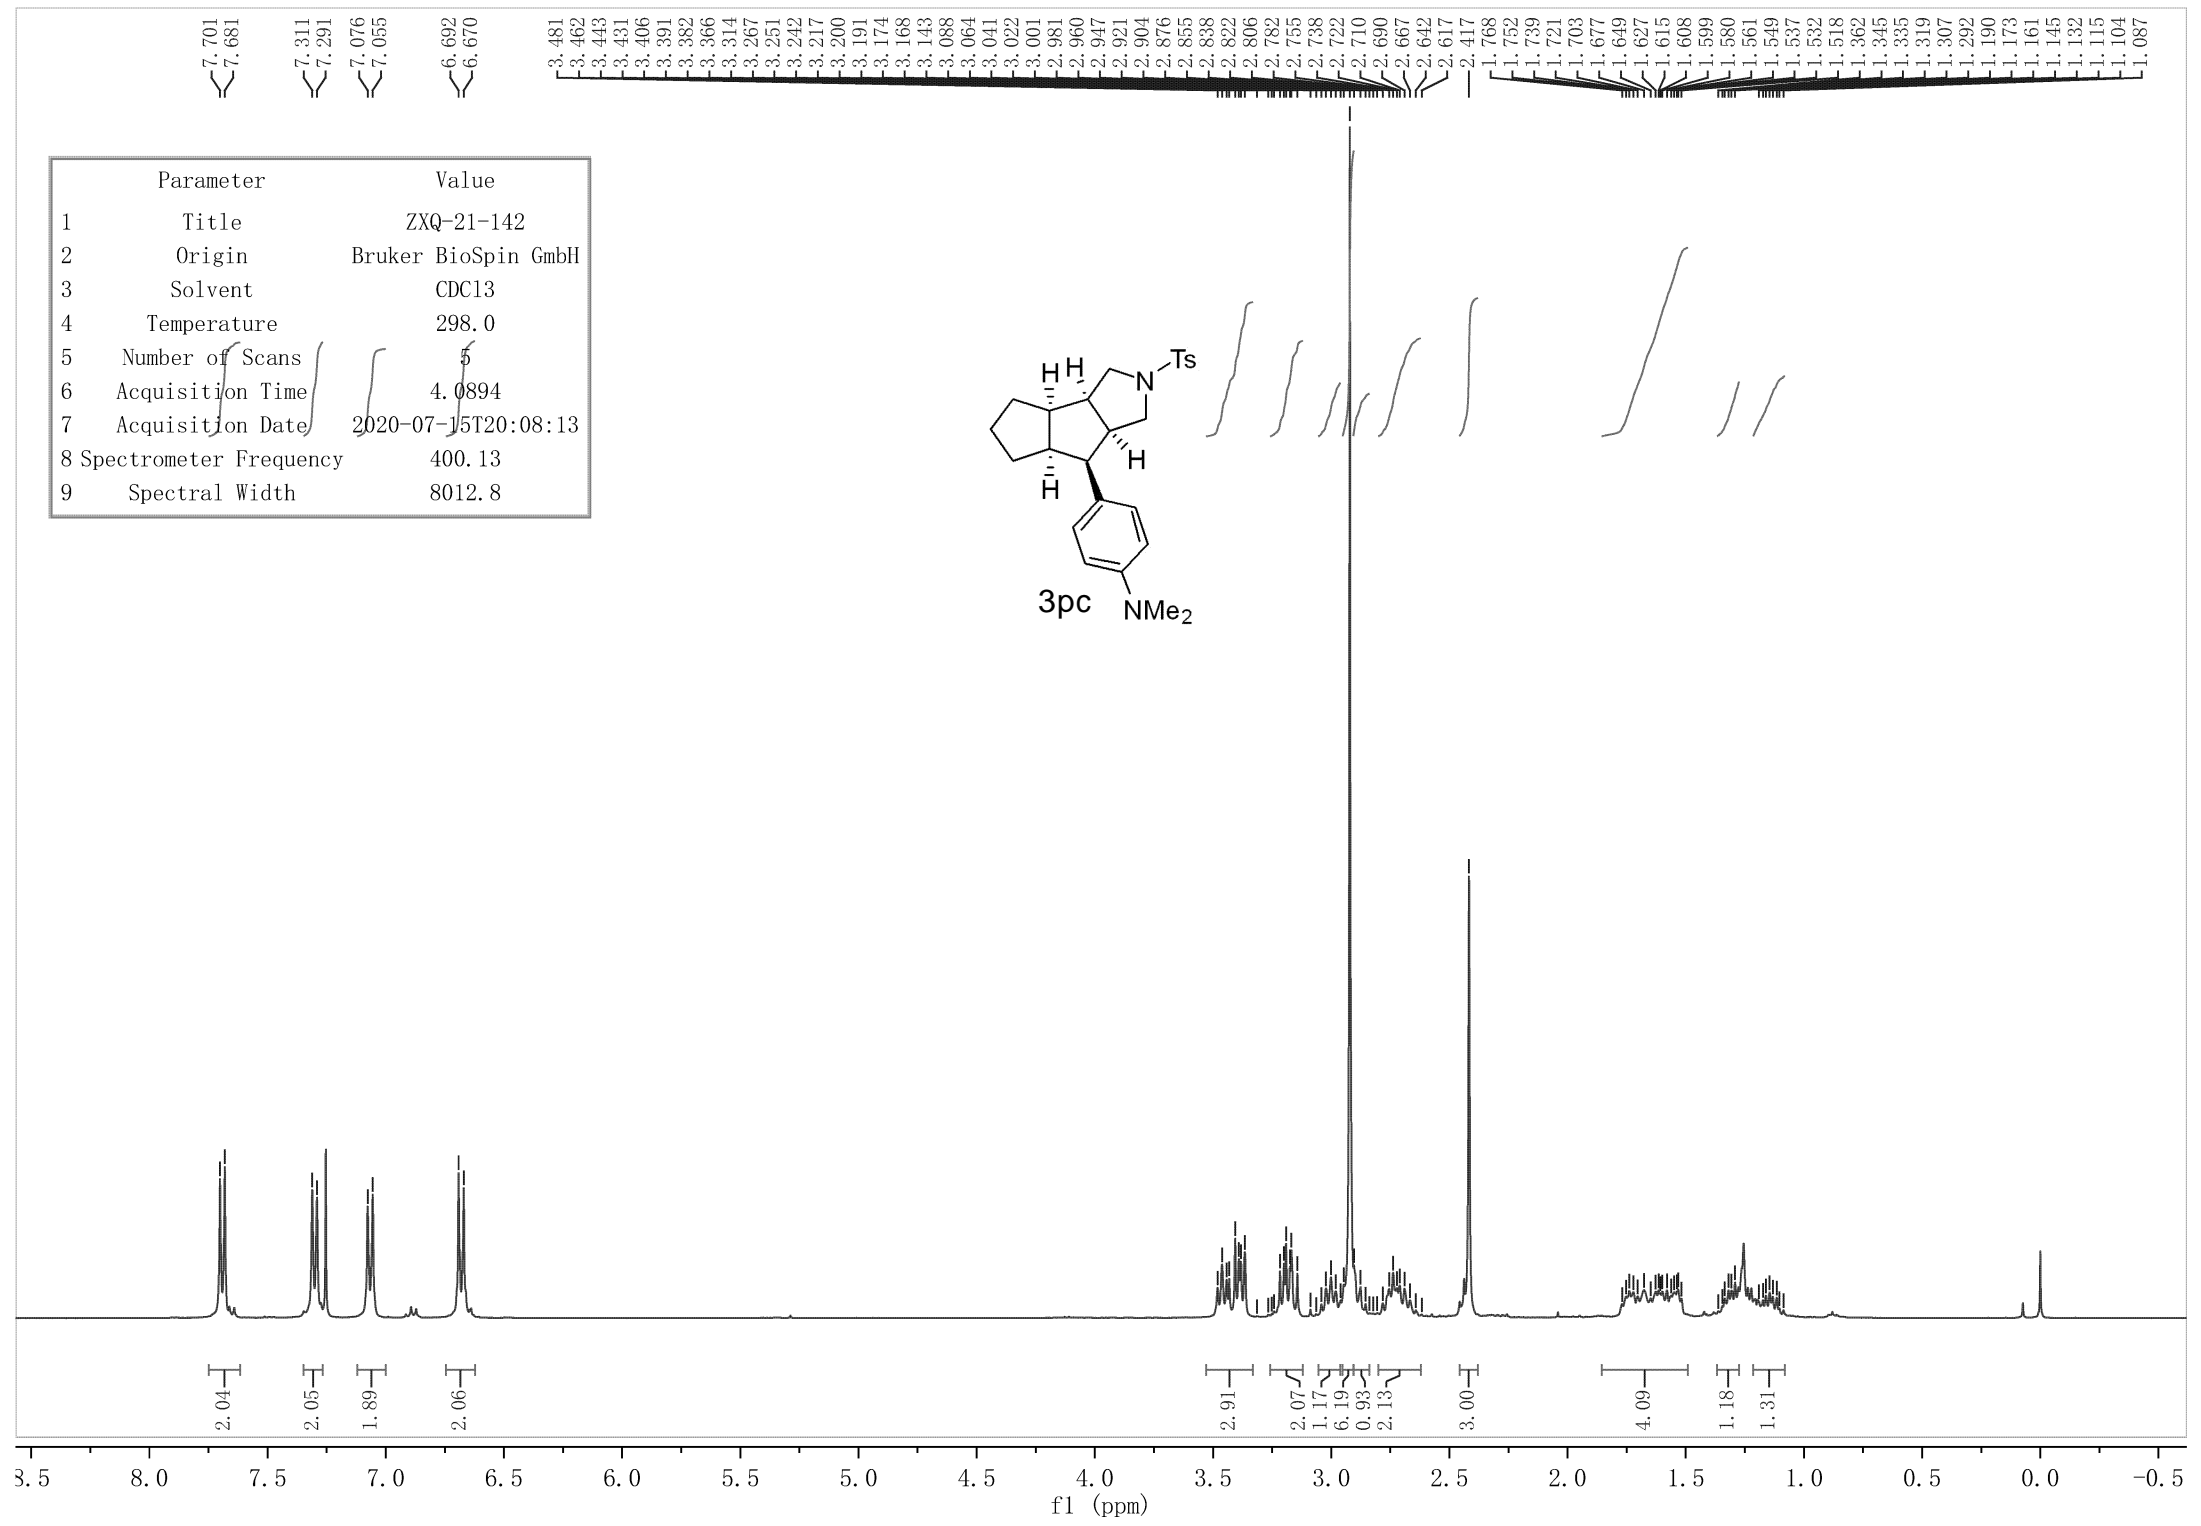

| Parameter                | Value               |
|--------------------------|---------------------|
| 1 Title                  | ZXQ-21-142-C        |
| 2 Origin                 | Bruker BioSpin GmbH |
| 3 Solvent                | CDC13               |
| 4 Temperature            | 300.0               |
| 5 Number of Scans        | 24                  |
| 6 Acquisition Time       | 1.3631              |
| 7 Acquisition Date       | 2020-07-15T20:09:29 |
| 8 Spectrometer Frequency | 100.61              |
| 9 Spectral Width         | 24038.5             |

— 148.72 — 143.22 — 133.61 — 129.48 — 129.13 — 129.00 — 127.50 — 112.58 — 77.32 — 77.00 — 76.68 — 49.94 — 49.82 — 49.72 — 48.58 — 47.07 — 45.62 — 44.94 — 40.70 — 30.86 — 28.12 — 27.77 — 21.46

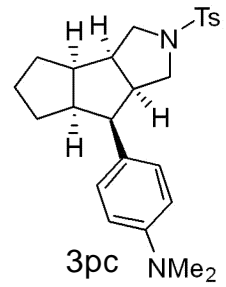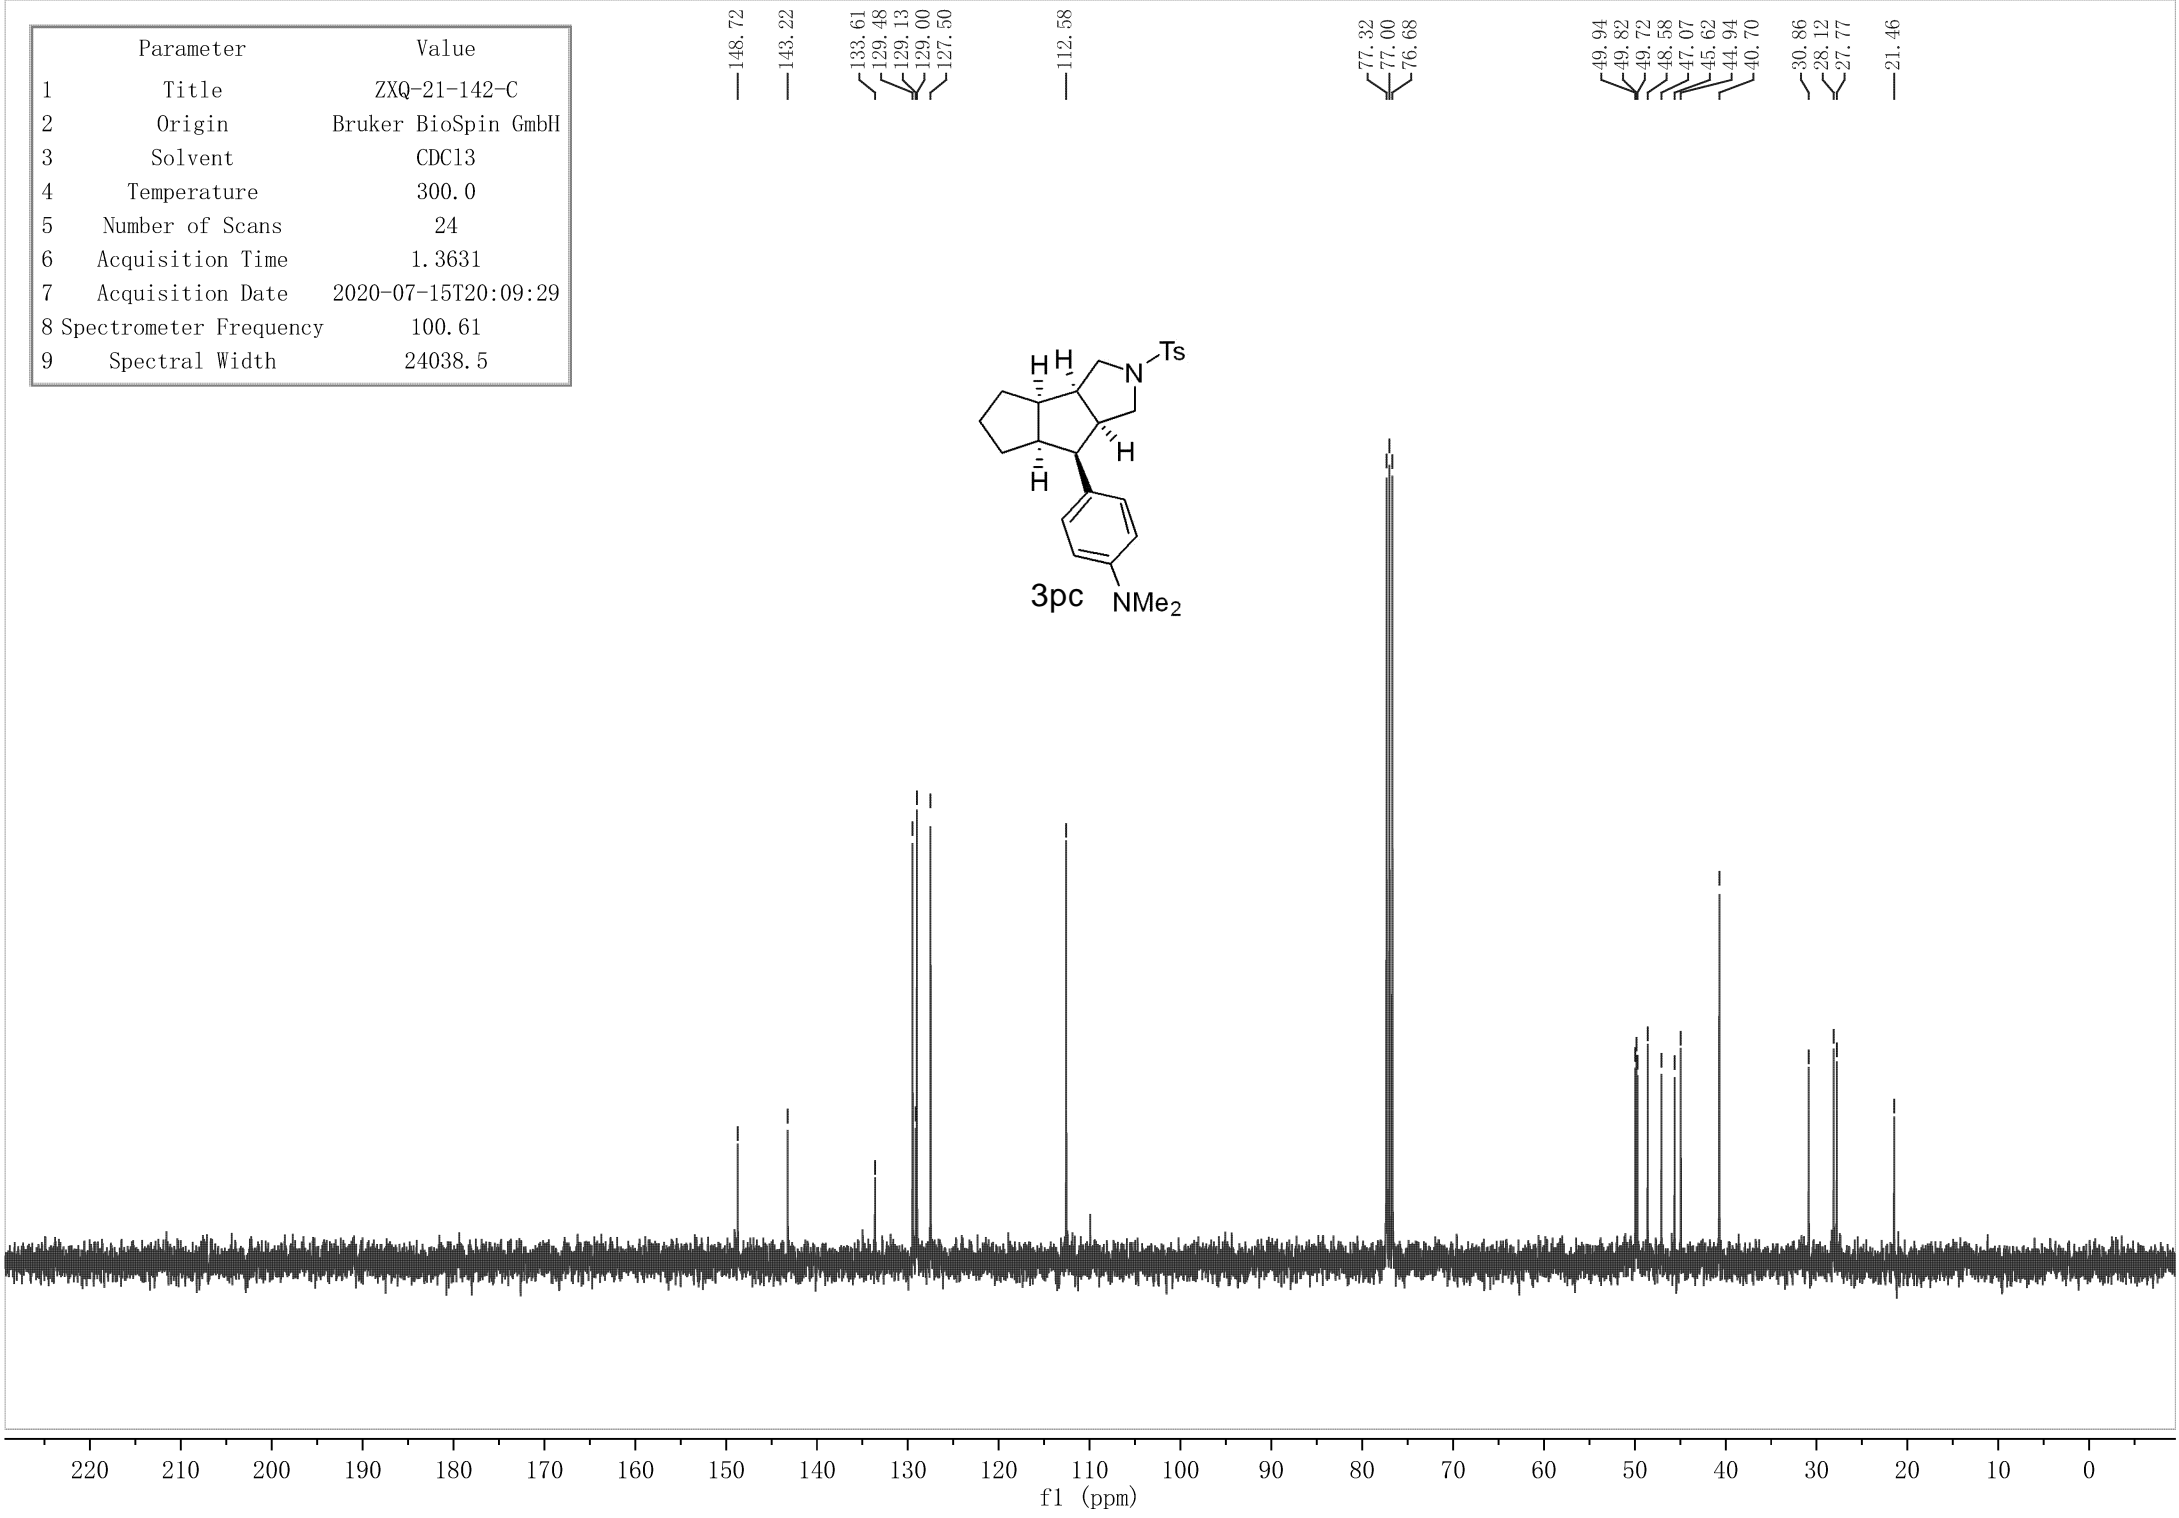

| Parameter                | Value               |
|--------------------------|---------------------|
| 1 Title                  | ZXQ-21-142-C-DEPT   |
| 2 Origin                 | Bruker BioSpin GmbH |
| 3 Solvent                | CDC13               |
| 4 Temperature            | 300.0               |
| 5 Number of Scans        | 11                  |
| 6 Acquisition Time       | 1.3631              |
| 7 Acquisition Date       | 2020-07-15T20:11:38 |
| 8 Spectrometer Frequency | 100.61              |
| 9 Spectral Width         | 24038.5             |

129.49  
129.01  
127.51

112.58

49.95  
49.82  
49.72  
48.59  
47.08  
45.63  
44.95  
40.70

30.86  
28.12  
27.77

21.46

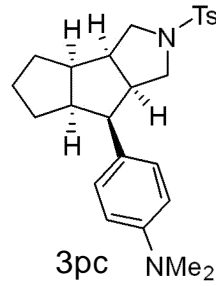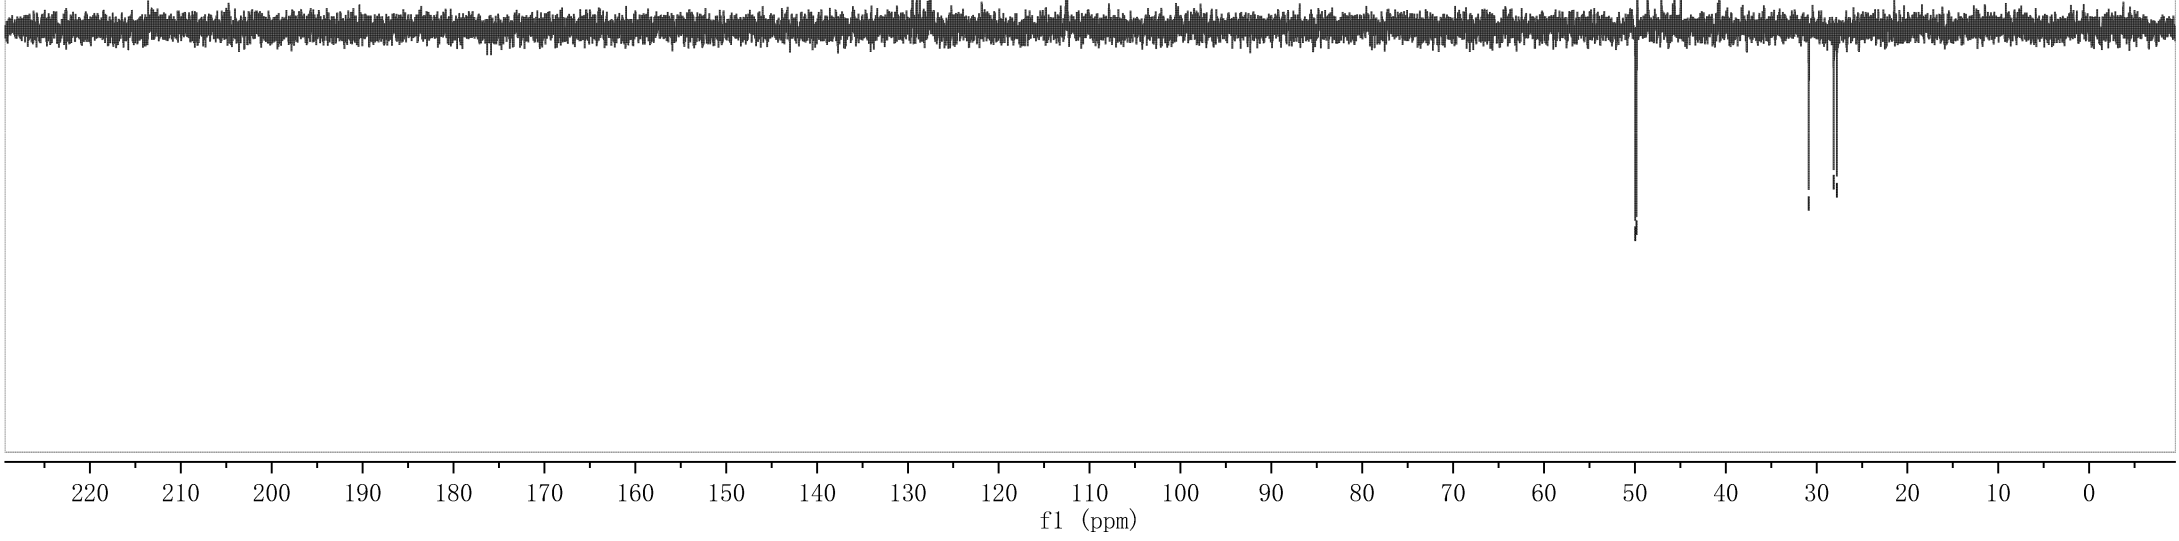



7.776  
7.755  
7.654  
7.633  
7.614  
7.598  
7.577  
7.470  
7.452  
7.432  
7.368  
7.350  
7.332  
7.270  
7.247  
7.140  
7.119  
7.068  
6.998

3.644  
3.624  
3.614  
3.595

2.807  
2.795  
2.783  
2.772  
2.761  
2.751  
2.741

2.525  
2.504  
2.483  
2.460  
2.439  
2.373  
2.225  
2.211  
2.191  
2.145  
2.127  
2.116  
2.099  
2.084  
1.131  
1.102  
1.081  
1.052  
1.023

| Parameter                | Value               |
|--------------------------|---------------------|
| 1 Title                  | ZXQ-20-92           |
| 2 Origin                 | Bruker BioSpin GmbH |
| 3 Solvent                | CDC13               |
| 4 Temperature            | 298.2               |
| 5 Number of Scans        | 5                   |
| 6 Acquisition Time       | 3.9846              |
| 7 Acquisition Date       | 2020-04-24T21:10:18 |
| 8 Spectrometer Frequency | 400.03              |
| 9 Spectral Width         | 8223.7              |

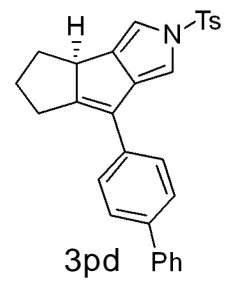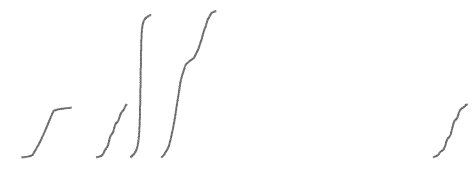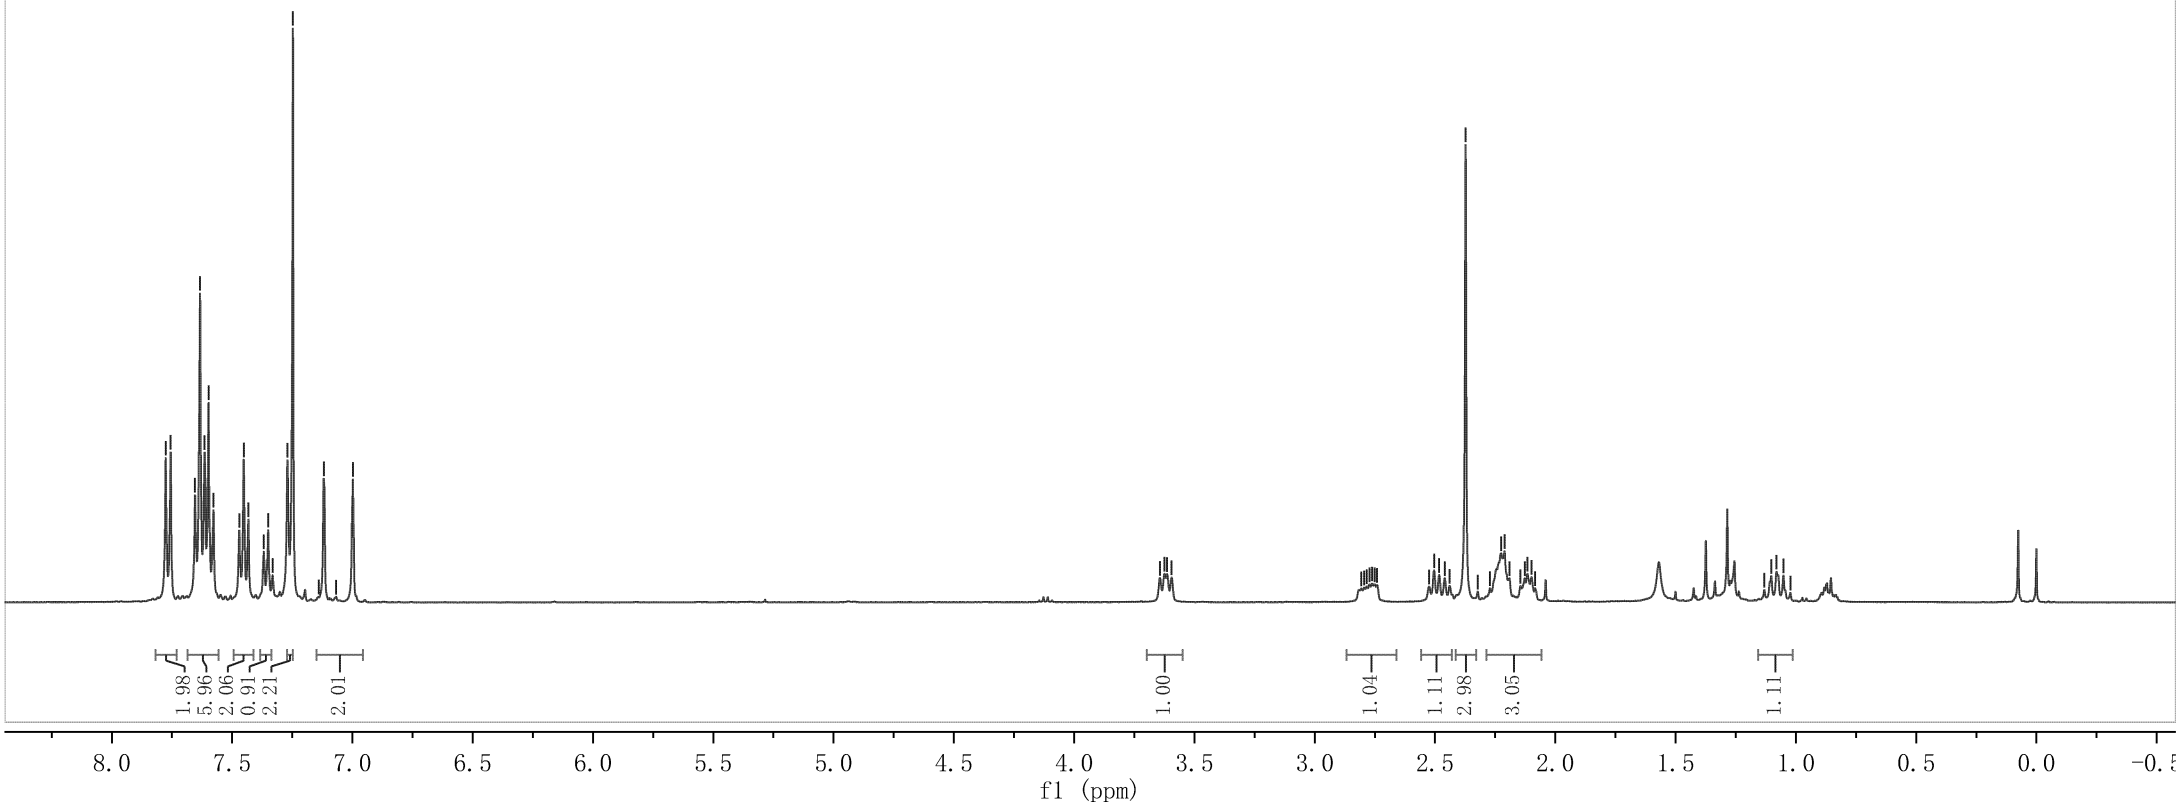

| Parameter                | Value               |
|--------------------------|---------------------|
| 1 Title                  | ZXQ-20-92-C         |
| 2 Origin                 | Bruker BioSpin GmbH |
| 3 Solvent                | CDC13               |
| 4 Temperature            | 298.6               |
| 5 Number of Scans        | 100                 |
| 6 Acquisition Time       | 1.3631              |
| 7 Acquisition Date       | 2020-04-24T21:12:25 |
| 8 Spectrometer Frequency | 100.59              |
| 9 Spectral Width         | 24038.5             |

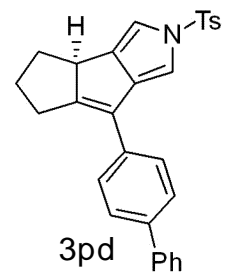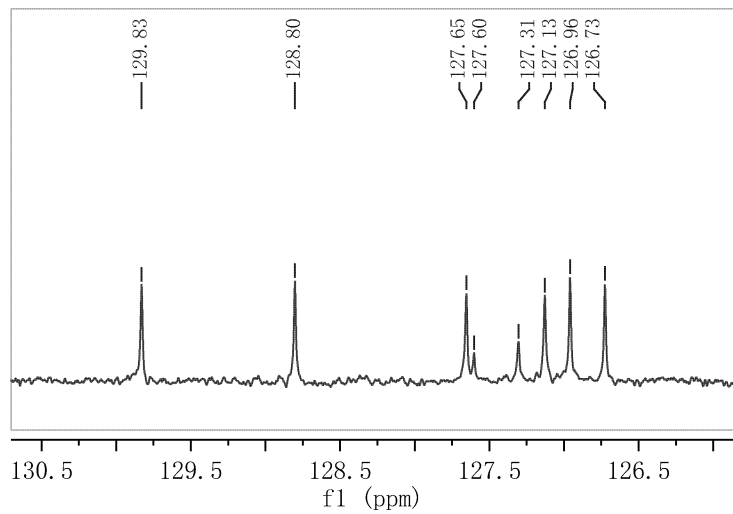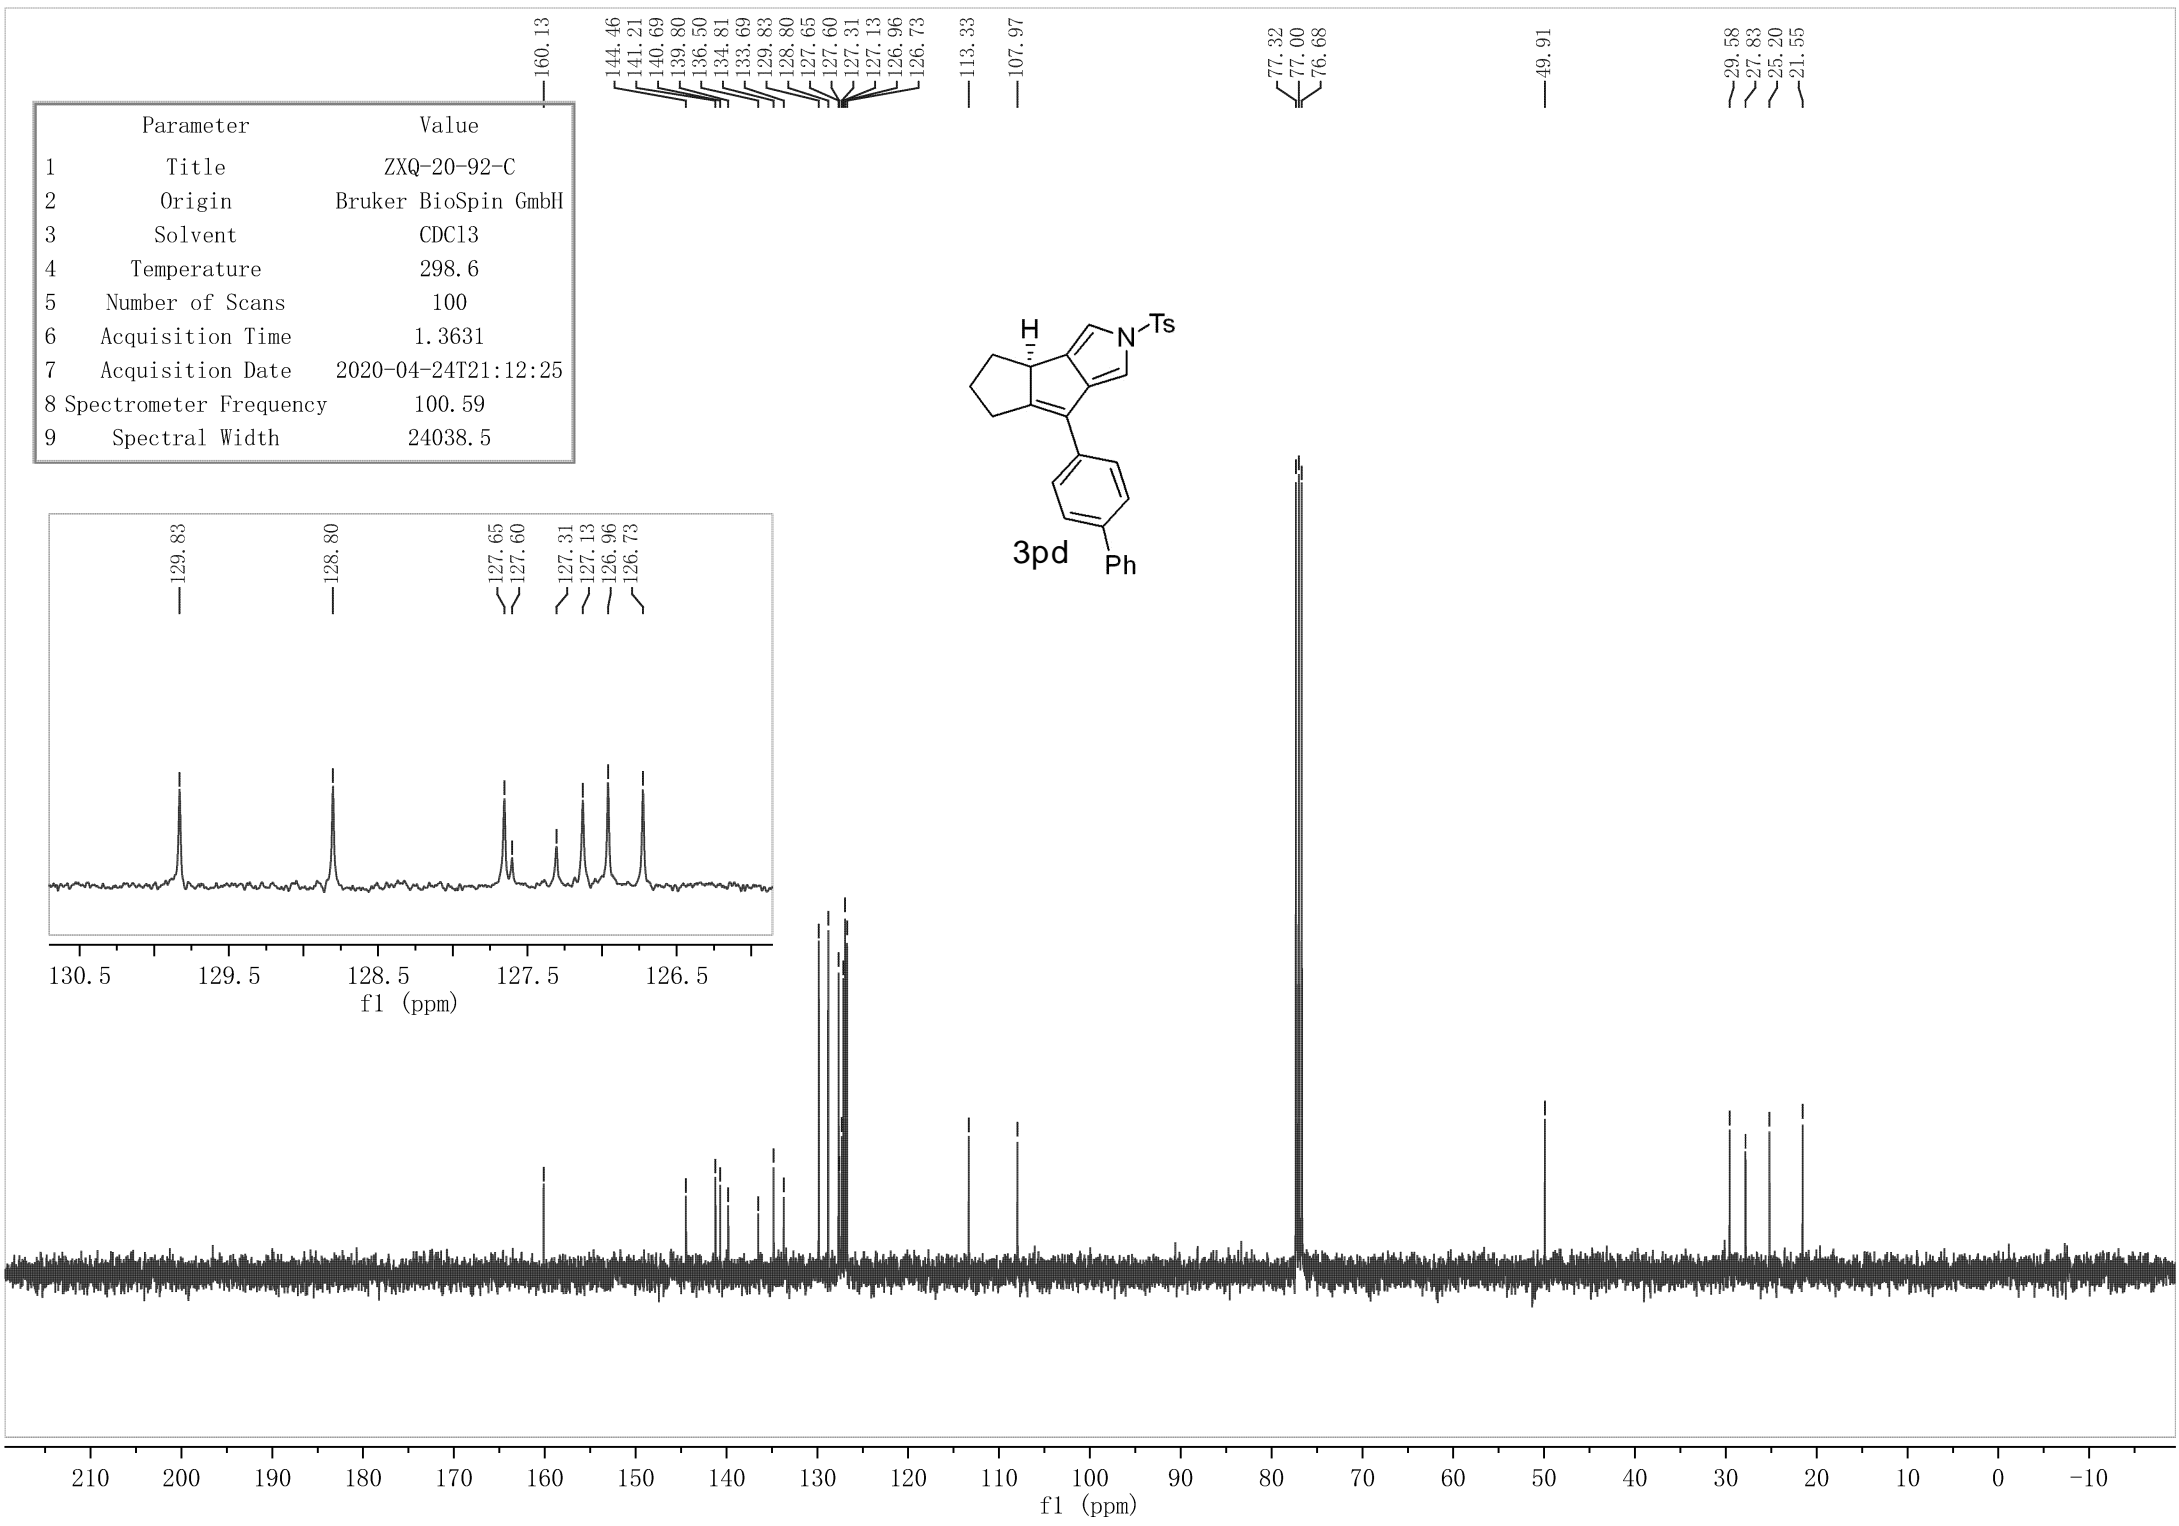

| Parameter                | Value               |
|--------------------------|---------------------|
| 1 Title                  | ZXQ-20-92-C-DEPT    |
| 2 Origin                 | Bruker BioSpin GmbH |
| 3 Solvent                | CDC13               |
| 4 Temperature            | 299.2               |
| 5 Number of Scans        | 43                  |
| 6 Acquisition Time       | 1.3631              |
| 7 Acquisition Date       | 2020-04-24T21:18:39 |
| 8 Spectrometer Frequency | 100.59              |
| 9 Spectral Width         | 24038.5             |

129.83  
128.80  
127.65  
127.30  
127.12  
126.95  
126.72

113.32

107.97

49.91

29.58  
27.83  
25.19  
21.55

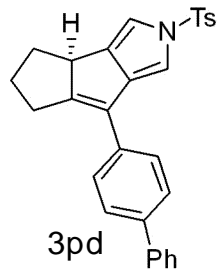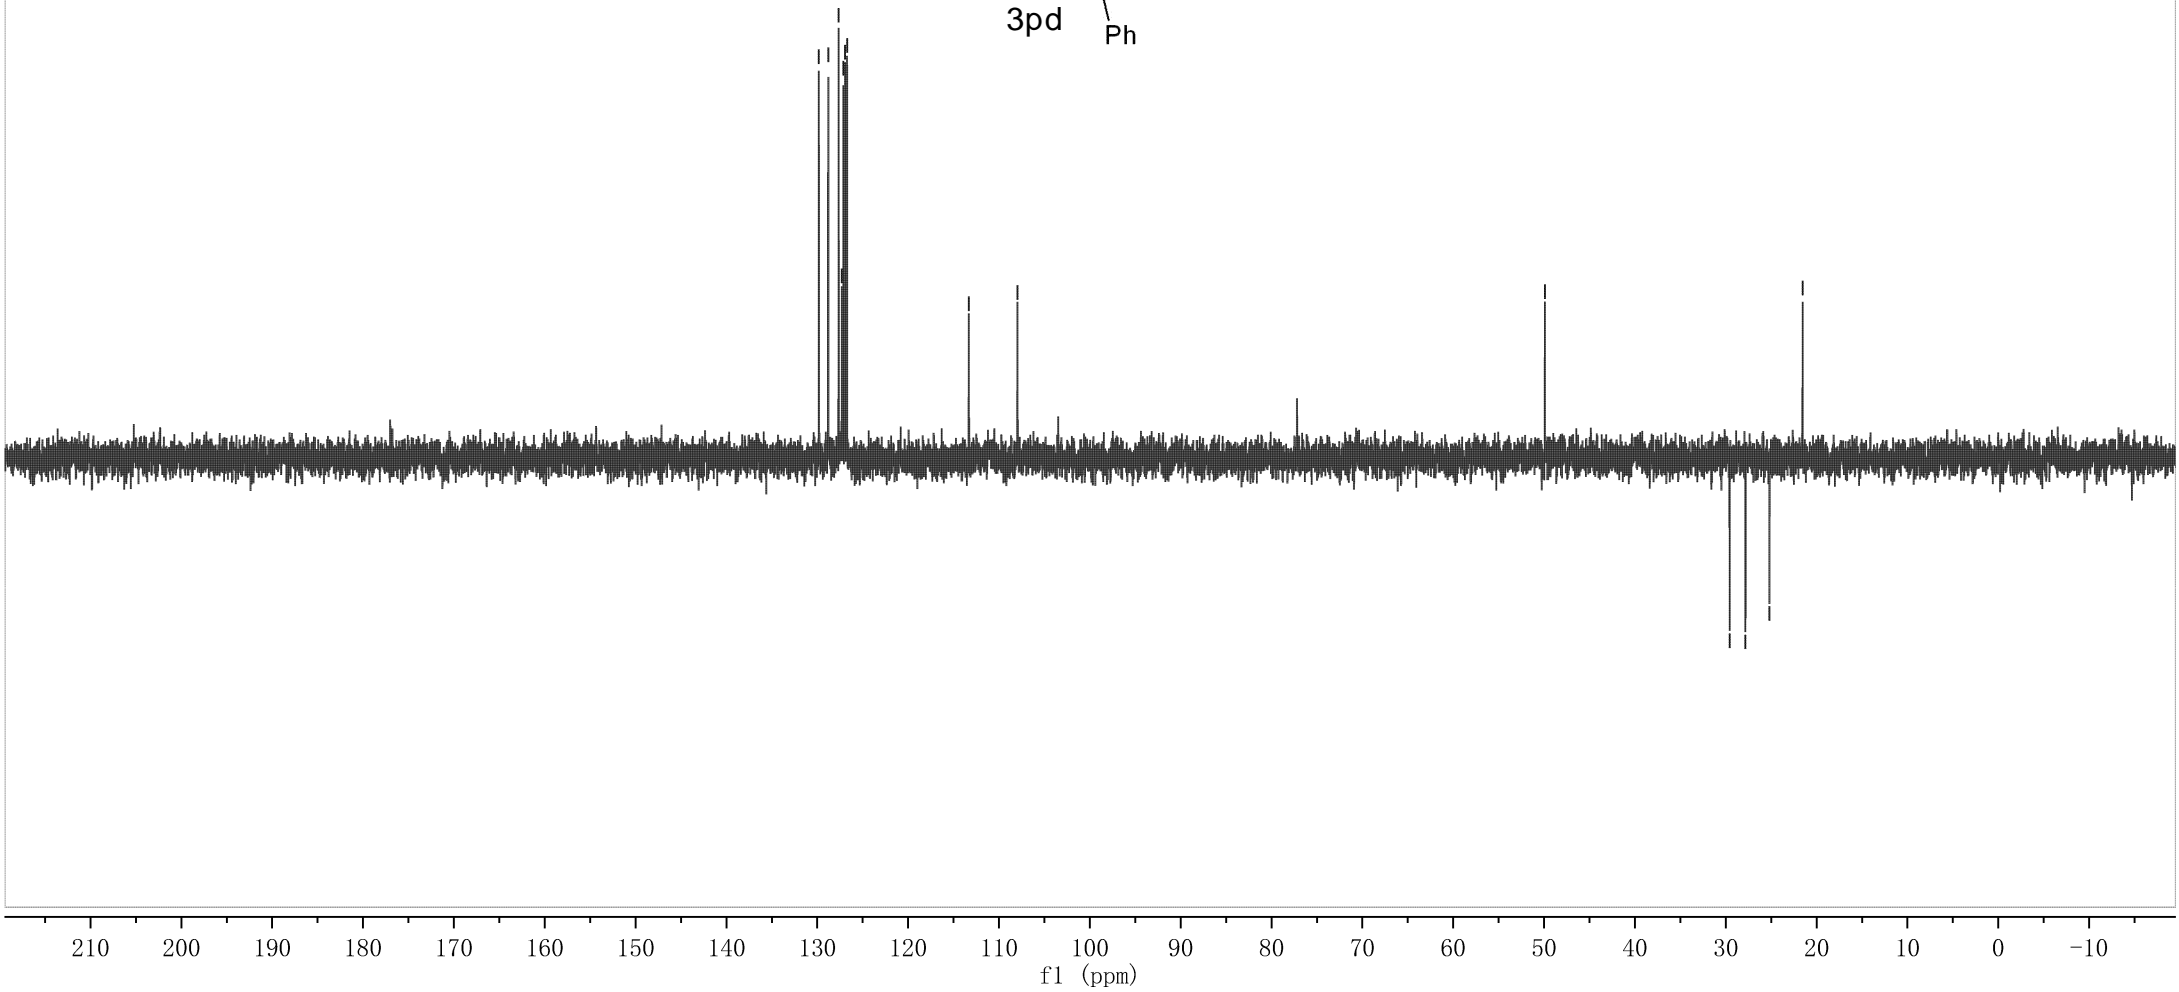

7.726  
7.706  
7.280  
7.259  
7.013  
6.993  
6.800  
6.773  
6.632  
6.611

4.349  
4.330

3.414  
3.393  
3.366  
3.355  
3.347  
3.193  
3.173  
3.152  
3.132  
3.112

2.401

1.997  
1.983  
1.972  
1.964  
1.951  
1.632  
1.424  
1.414  
1.395  
1.373  
1.359  
1.108  
1.092  
1.075  
1.059  
1.037  
1.019  
1.005  
0.997  
0.986

| Parameter                | Value               |
|--------------------------|---------------------|
| 1 Title                  | ZXQ-21-154-1        |
| 2 Origin                 | Braker BioSpin GmbH |
| 3 Solvent                | CDCl3               |
| 4 Temperature            | 298.0               |
| 5 Number of Scans        | 10                  |
| 6 Acquisition Time       | 4.0894              |
| 7 Acquisition Date       | 2020-07-18T20:34:47 |
| 8 Spectrometer Frequency | 400.13              |
| 9 Spectral Width         | 8012.8              |

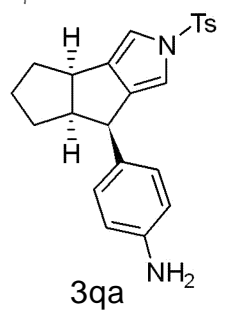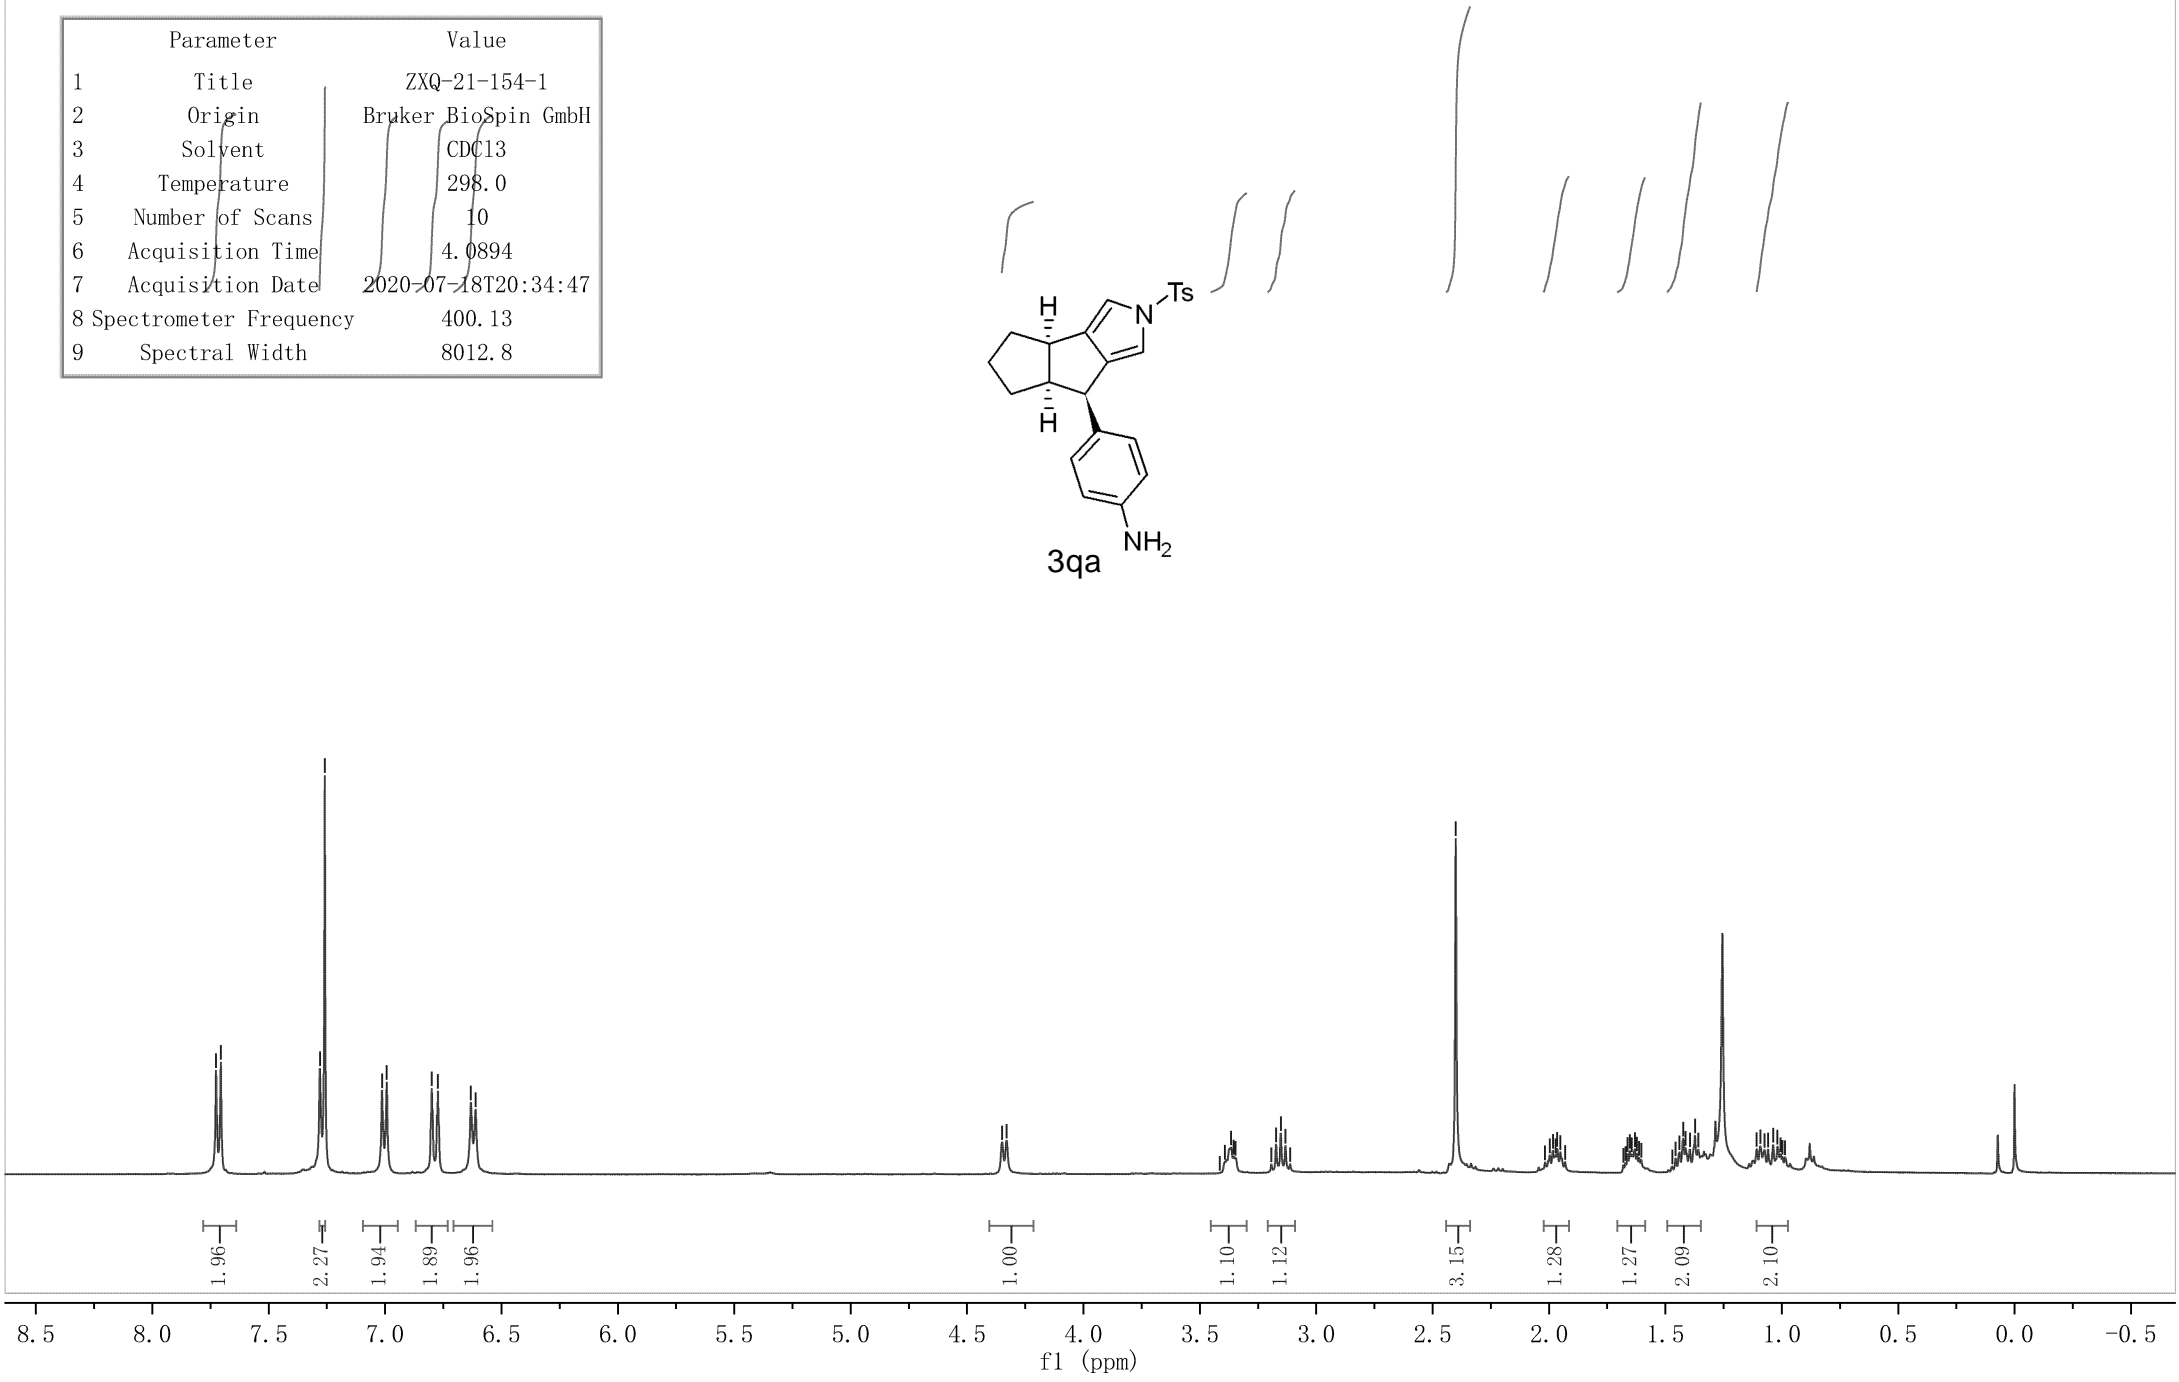

| Parameter                | Value               |
|--------------------------|---------------------|
| 1 Title                  | ZXQ-21-154-C        |
| 2 Origin                 | Bruker BioSpin GmbH |
| 3 Solvent                | CDC13               |
| 4 Temperature            | 300.0               |
| 5 Number of Scans        | 121                 |
| 6 Acquisition Time       | 1.3631              |
| 7 Acquisition Date       | 2020-07-18T17:44:37 |
| 8 Spectrometer Frequency | 100.61              |
| 9 Spectral Width         | 24038.5             |

144.40  
141.47  
137.49  
136.62

130.97  
129.76  
128.99  
126.68

114.99  
113.54  
112.31

77.32  
77.00  
76.68

57.05

46.03  
42.26

33.20  
28.62  
26.63

21.57

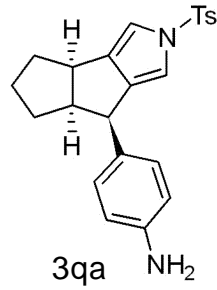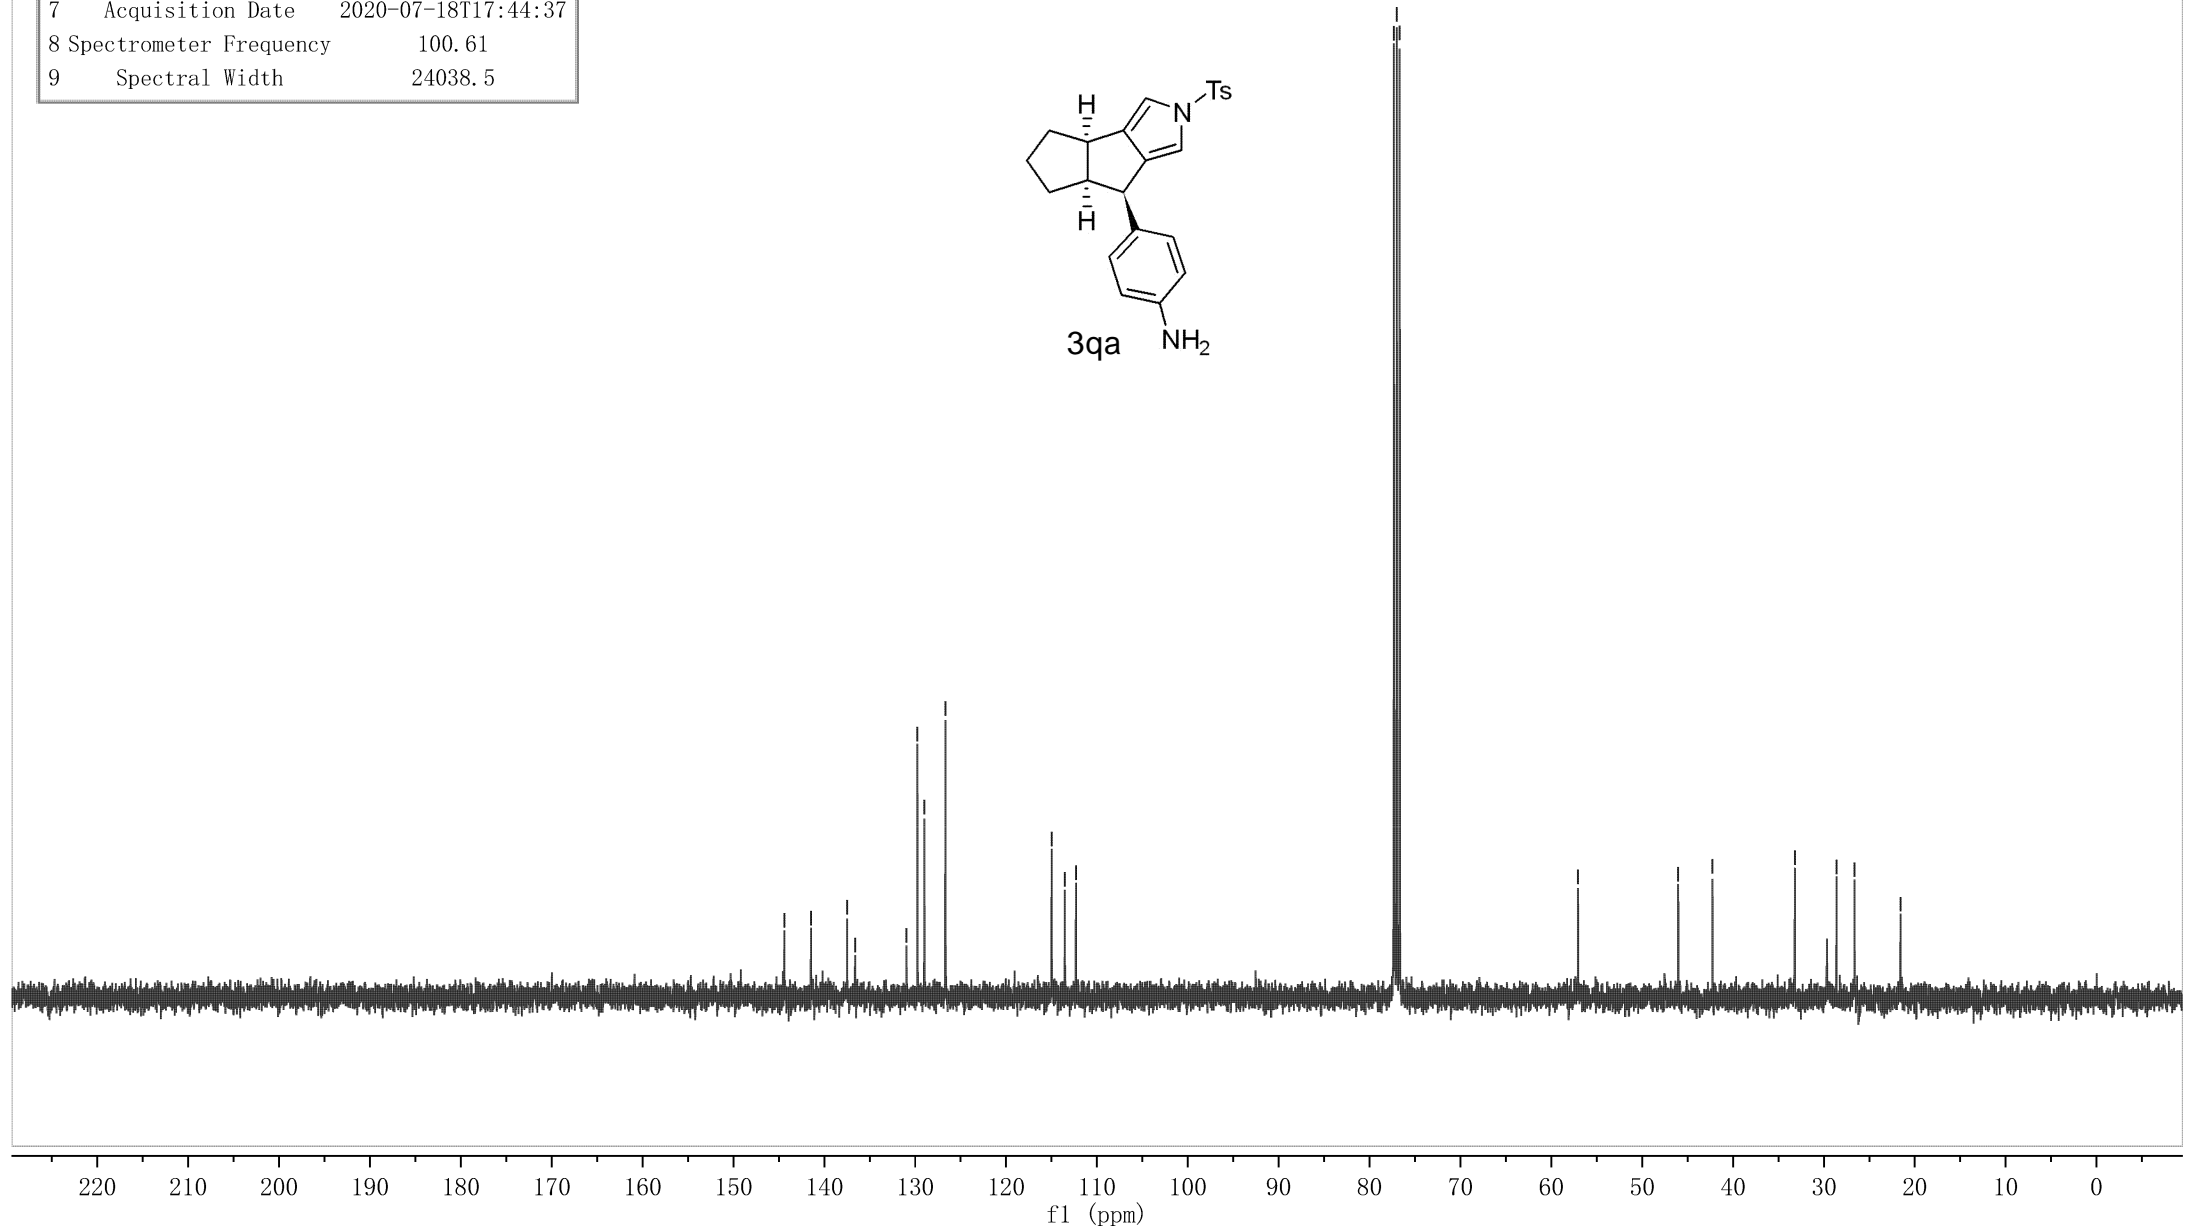

| Parameter                | Value               |
|--------------------------|---------------------|
| 1 Title                  | ZXQ-21-154-C-DEPT   |
| 2 Origin                 | Bruker BioSpin GmbH |
| 3 Solvent                | CDC13               |
| 4 Temperature            | 300.0               |
| 5 Number of Scans        | 26                  |
| 6 Acquisition Time       | 1.3631              |
| 7 Acquisition Date       | 2020-07-18T17:52:35 |
| 8 Spectrometer Frequency | 100.61              |
| 9 Spectral Width         | 24038.5             |

129.79  
129.03  
126.71

115.02  
113.57  
112.35

57.09

46.07  
42.30

33.23  
28.65  
26.66

21.61

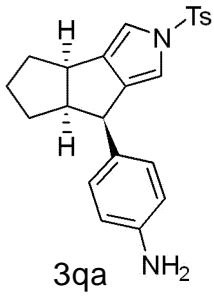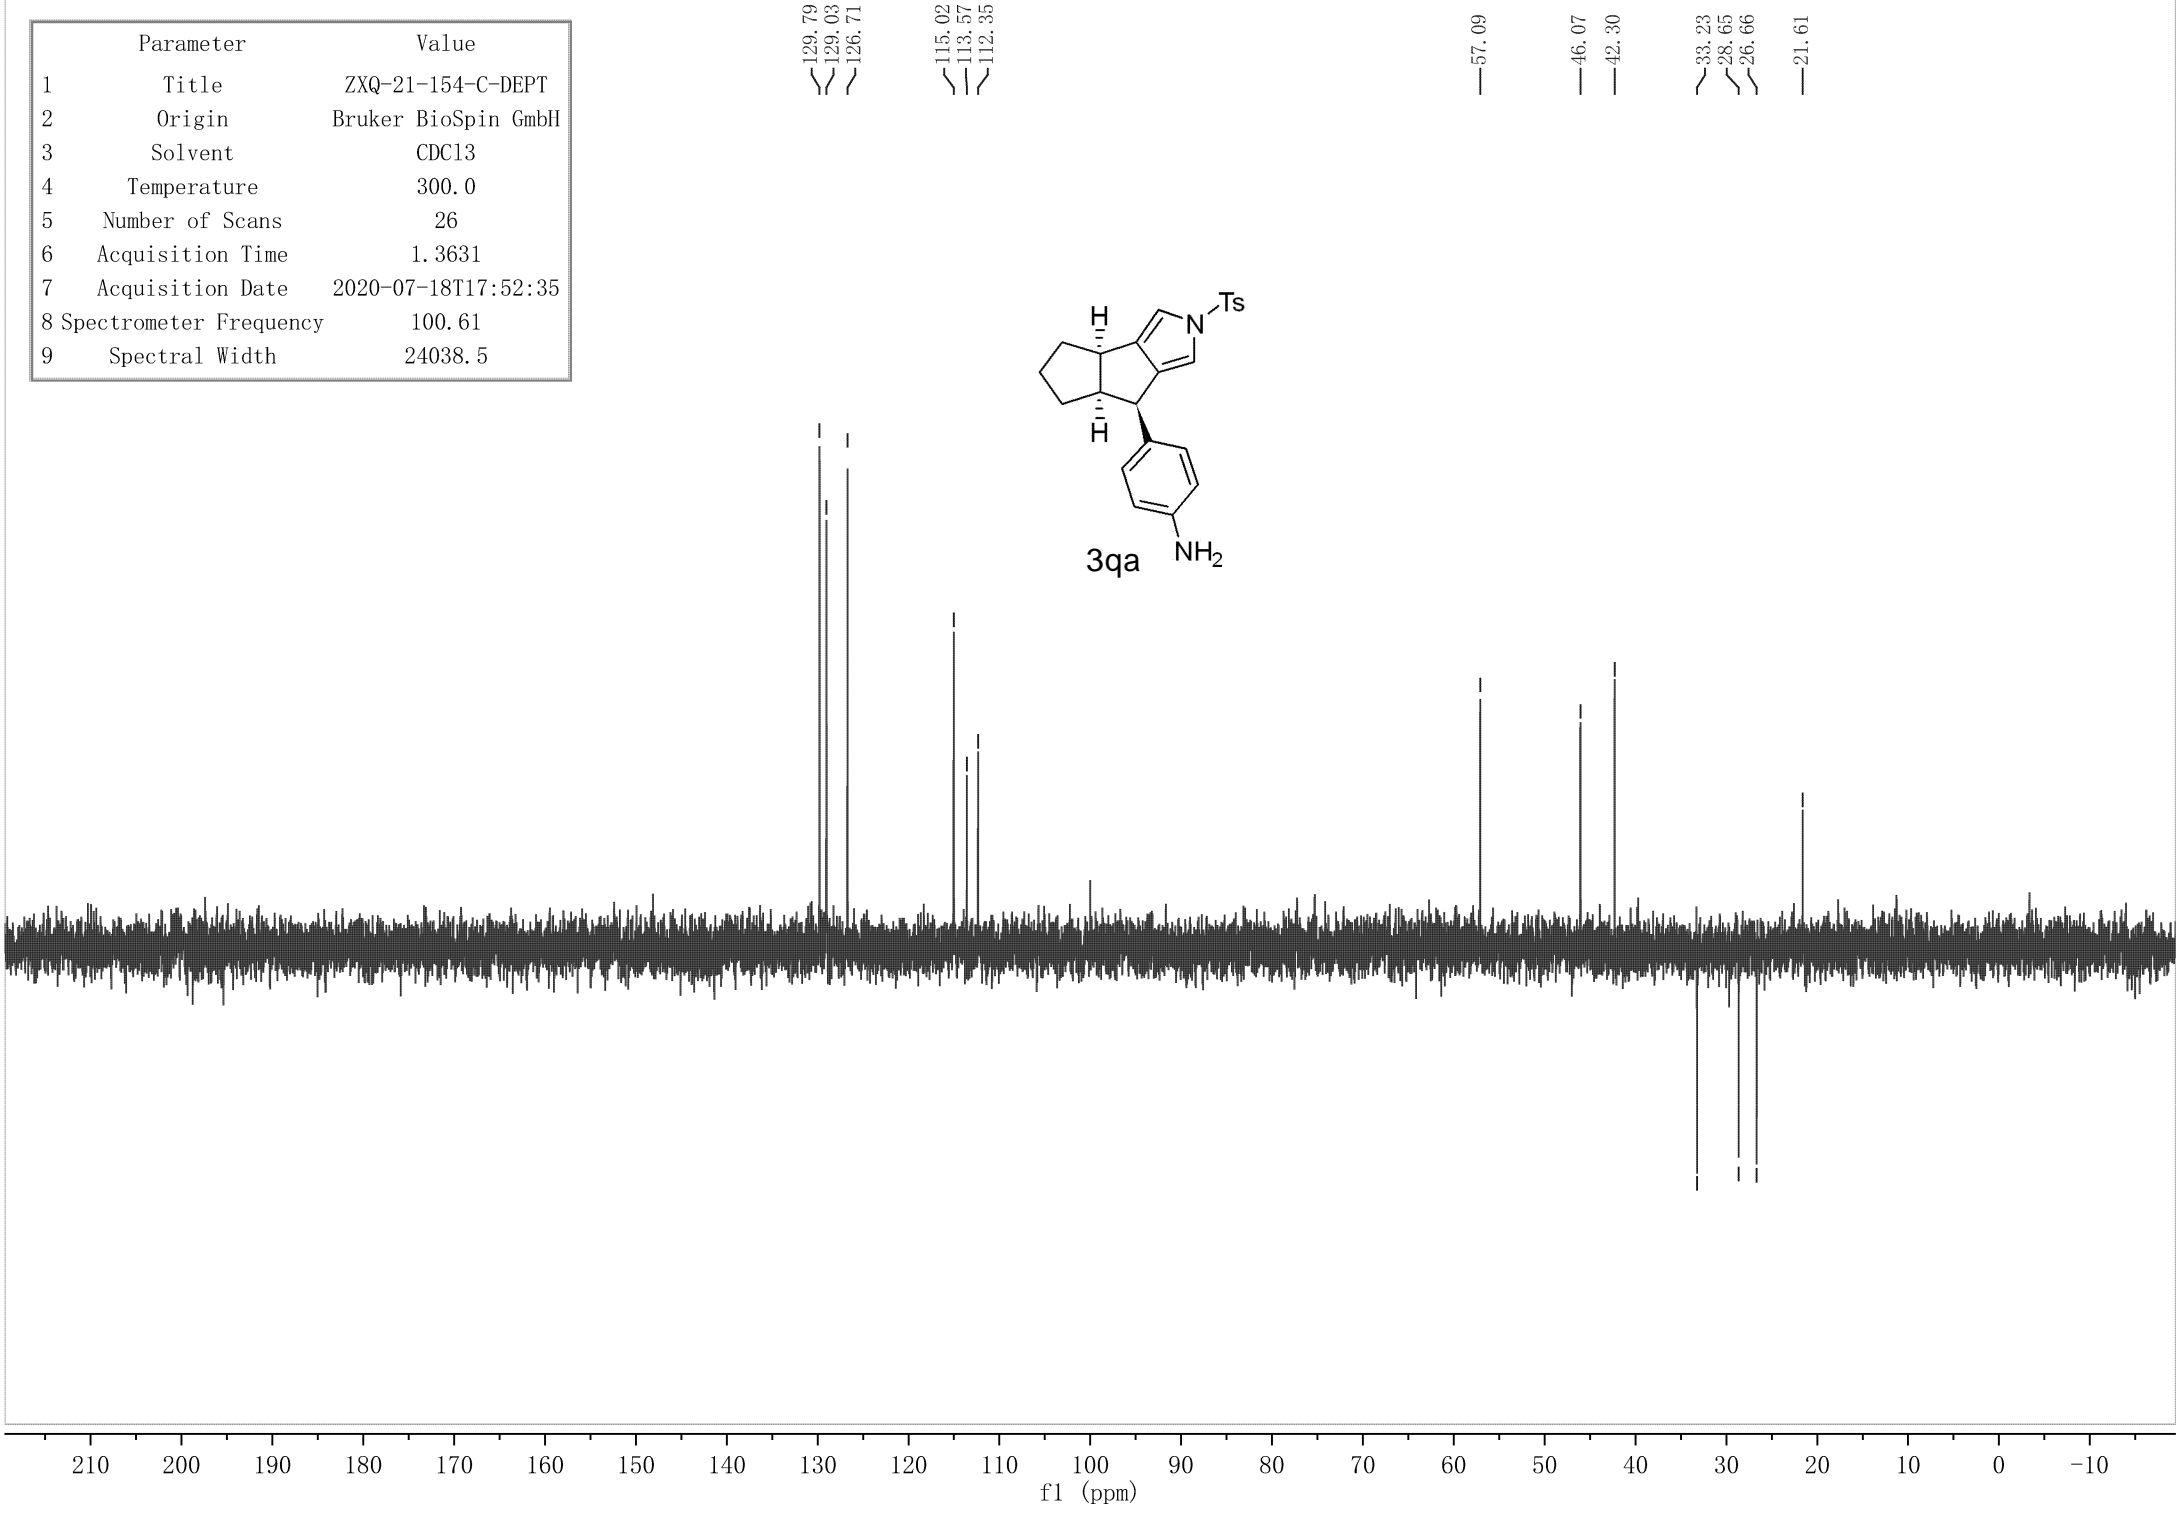

| Parameter                | Value               |
|--------------------------|---------------------|
| 1 Title                  | ZXQ-21-208          |
| 2 Origin                 | Bruker BioSpin GmbH |
| 3 Solvent                | CDC13               |
| 4 Temperature            | 298.0               |
| 5 Number of Scans        | 9                   |
| 6 Acquisition Time       | 4.0894              |
| 7 Acquisition Date       | 2020-08-07T11:20:41 |
| 8 Spectrometer Frequency | 400.13              |
| 9 Spectral Width         | 8012.8              |

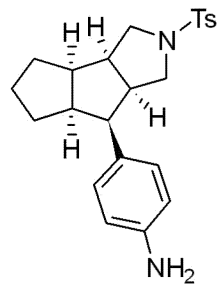

3qb

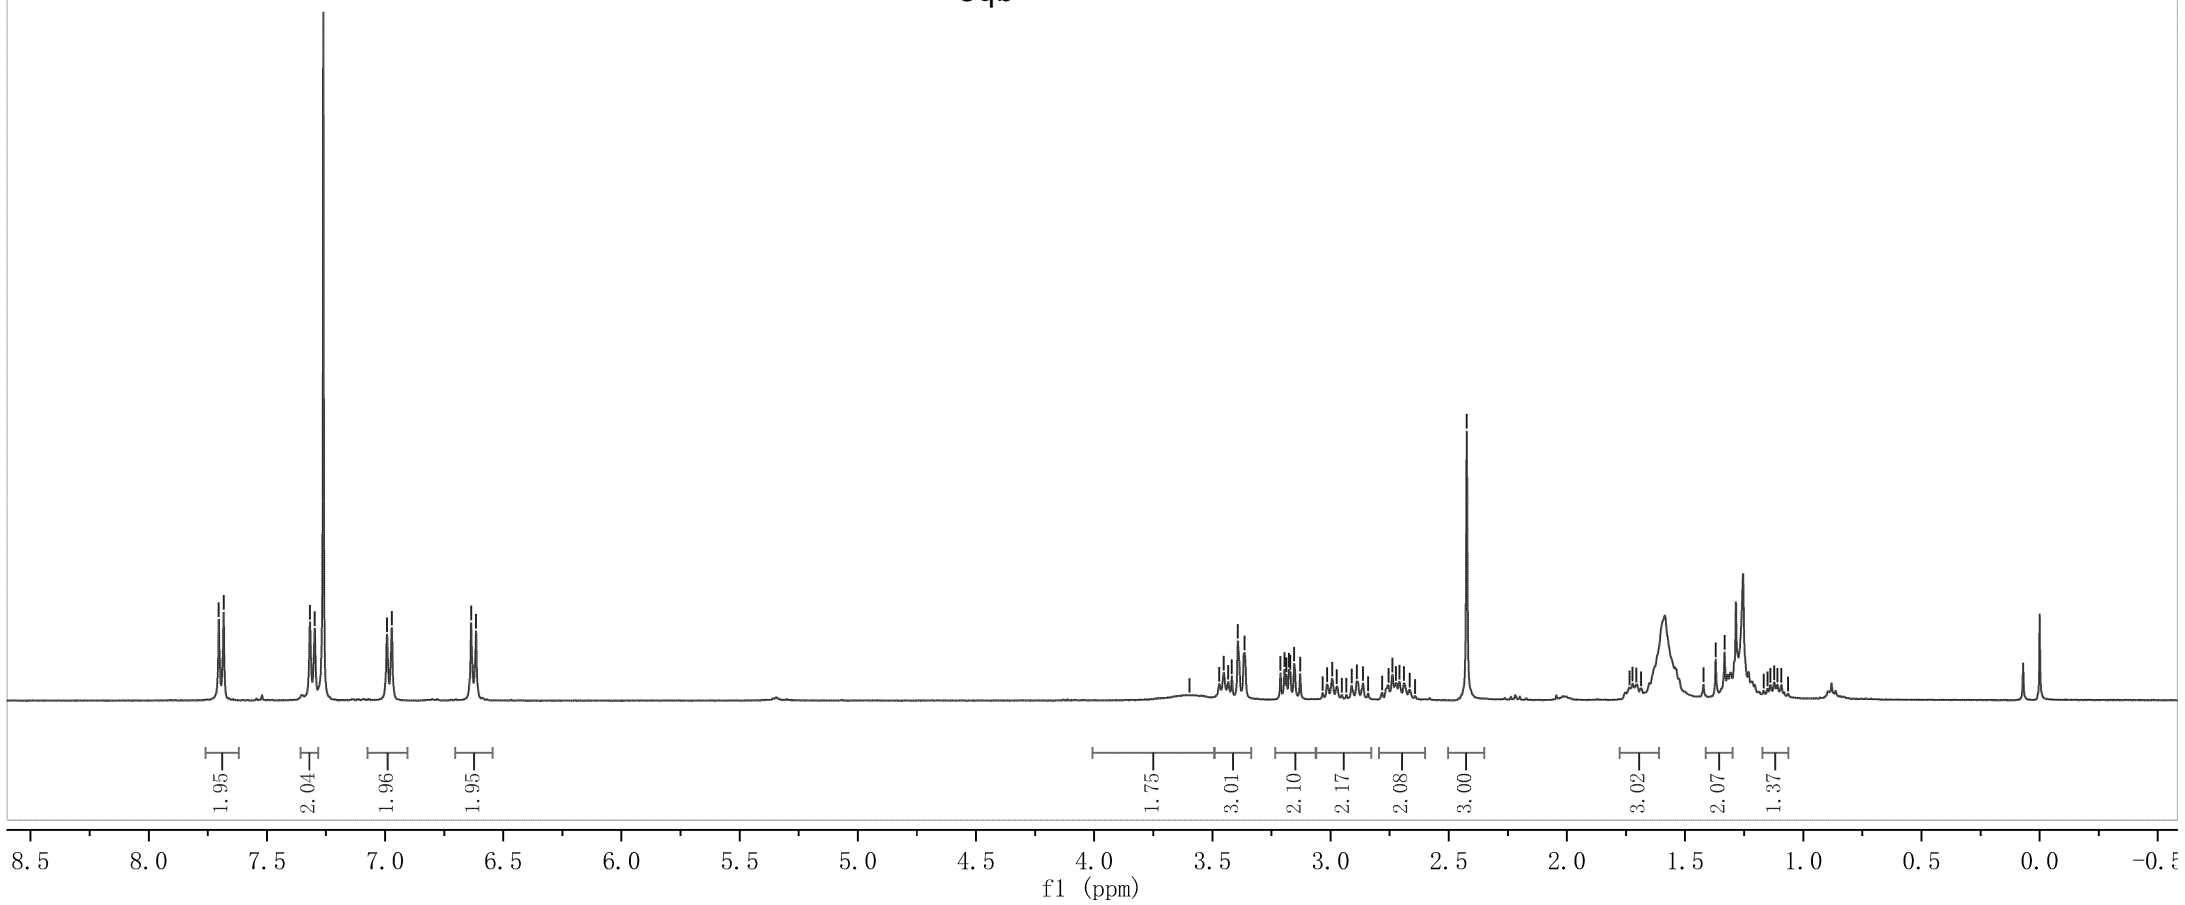

| Parameter                | Value               |
|--------------------------|---------------------|
| 1 Title                  | ZXQ-21-208-C-1      |
| 2 Origin                 | Bruker BioSpin GmbH |
| 3 Solvent                | CDC13               |
| 4 Temperature            | 300.0               |
| 5 Number of Scans        | 1024                |
| 6 Acquisition Time       | 1.3631              |
| 7 Acquisition Date       | 2020-08-08T07:24:02 |
| 8 Spectrometer Frequency | 100.61              |
| 9 Spectral Width         | 24038.5             |

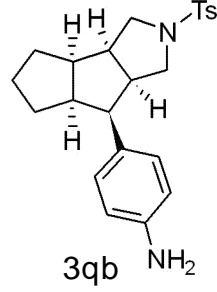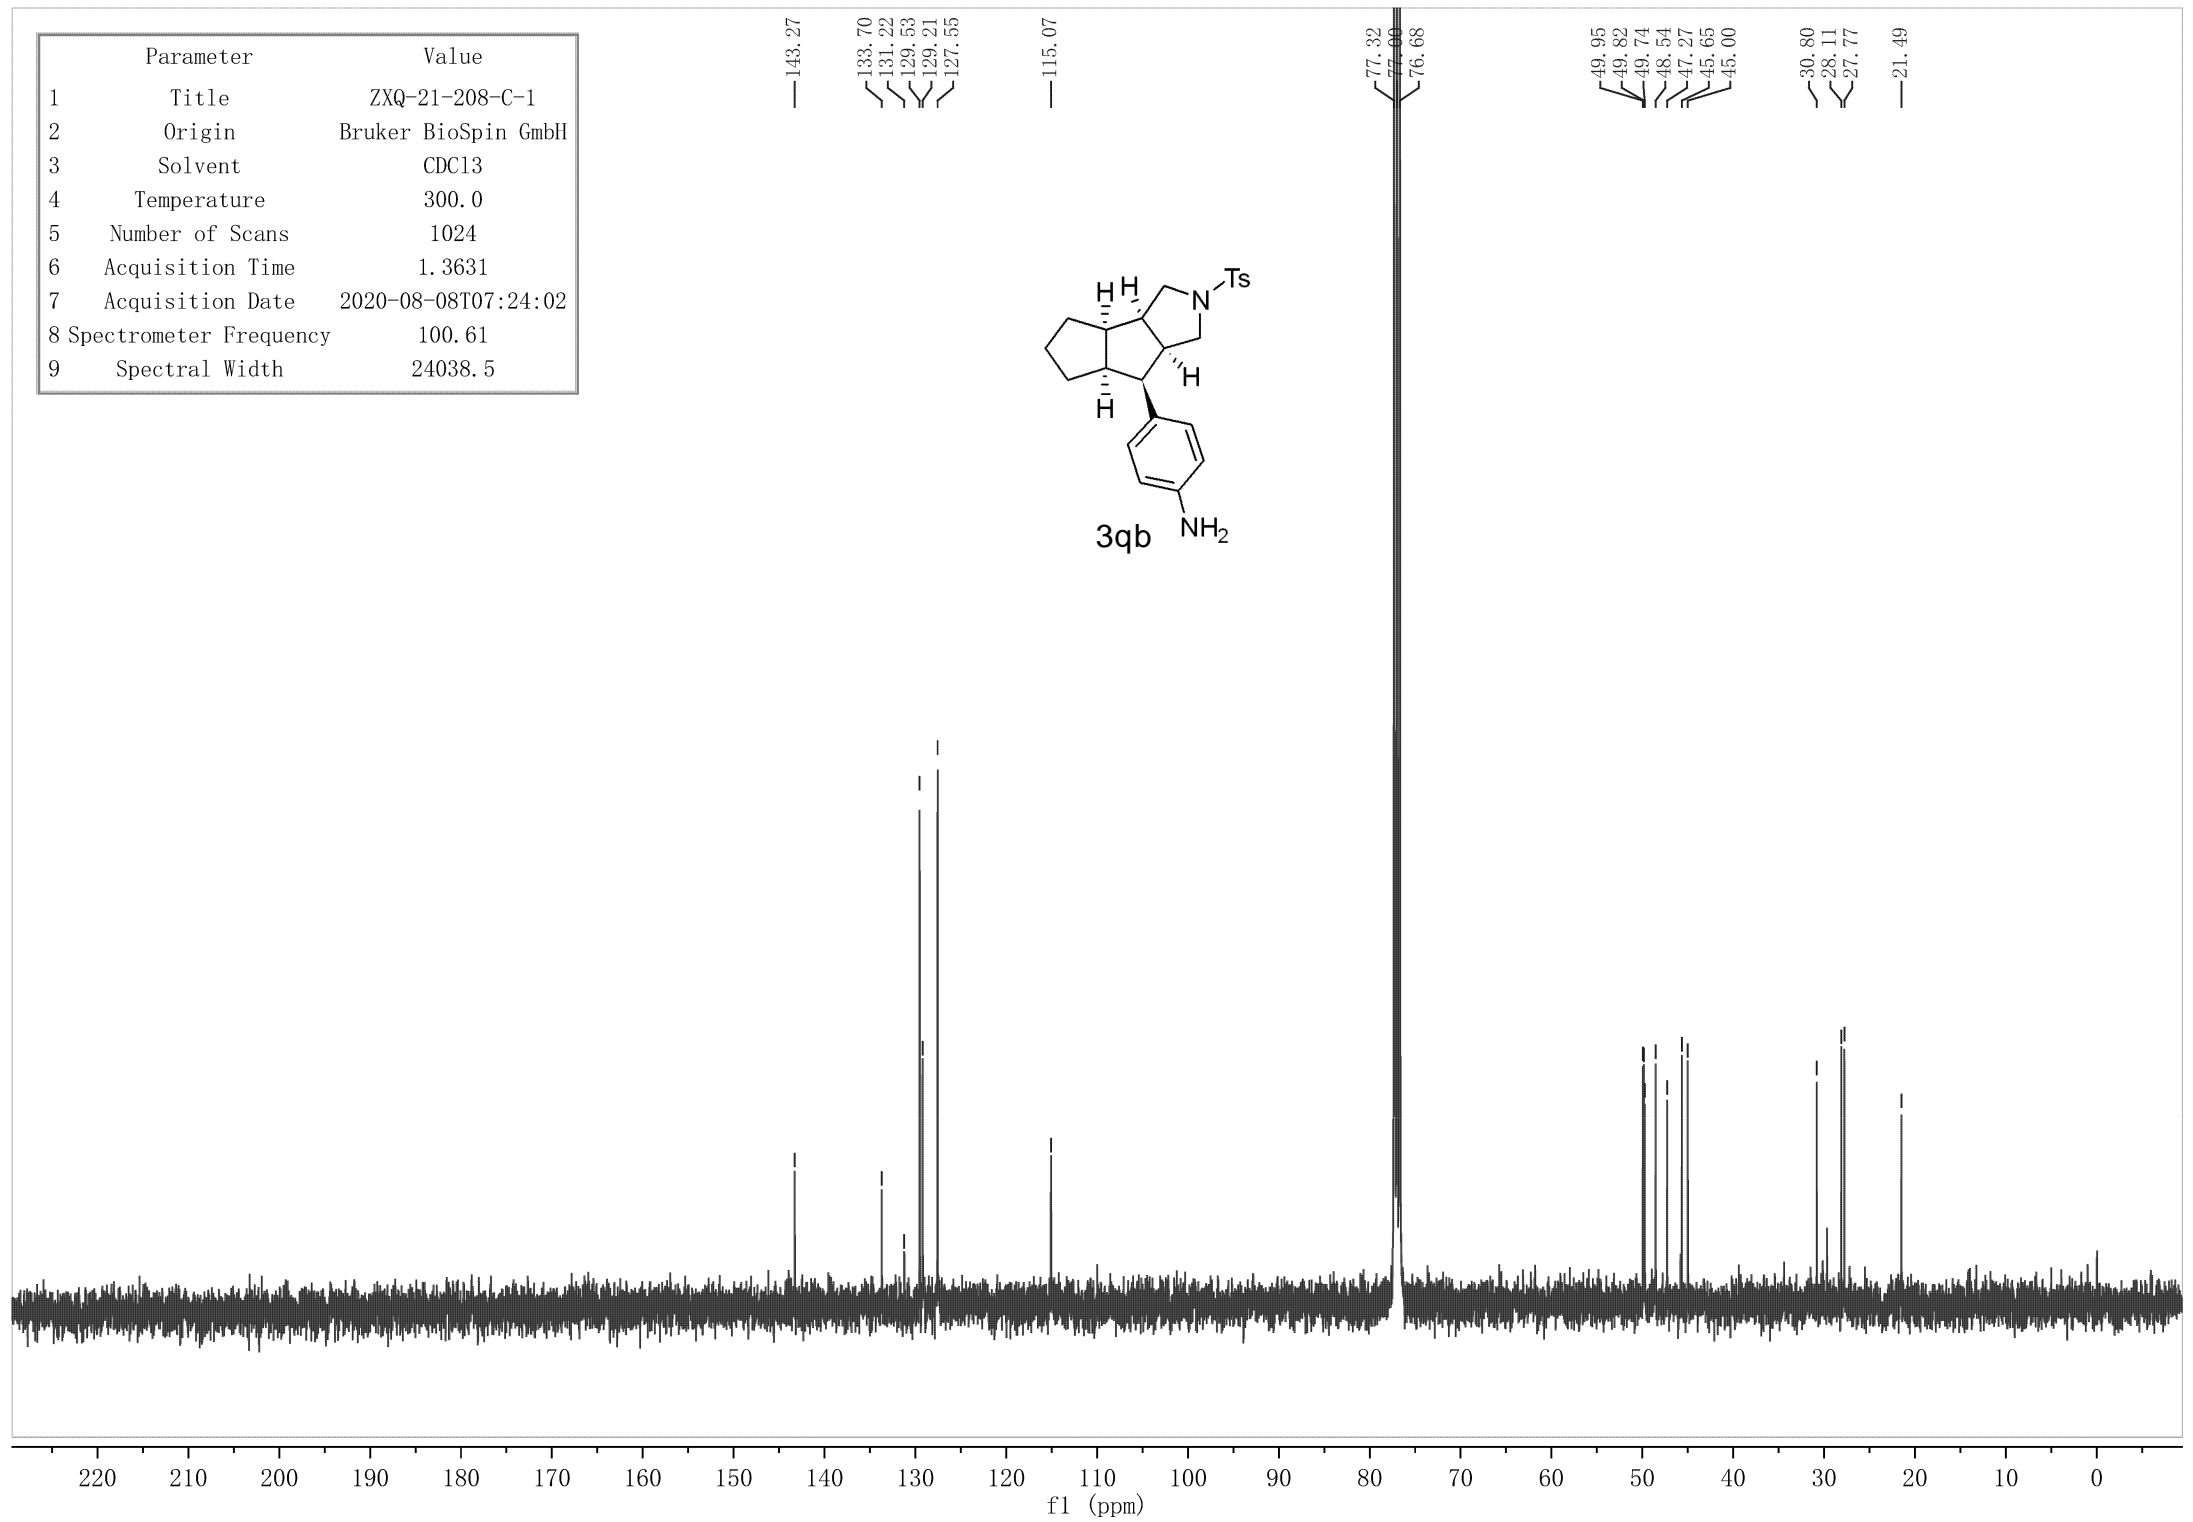



| Parameter                | Value               |
|--------------------------|---------------------|
| 1 Title                  | ZXQ-21-208-DEPT     |
| 2 Origin                 | Bruker BioSpin GmbH |
| 3 Solvent                | CDC13               |
| 4 Temperature            | 299.6               |
| 5 Number of Scans        | 198                 |
| 6 Acquisition Time       | 1.3631              |
| 7 Acquisition Date       | 2020-08-12T17:38:53 |
| 8 Spectrometer Frequency | 100.59              |
| 9 Spectral Width         | 24038.5             |

129.52  
129.20  
127.55

115.07

49.94  
49.82  
49.72  
48.52  
47.25  
45.64  
44.99

30.80  
28.10  
27.76  
21.49

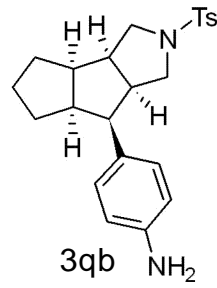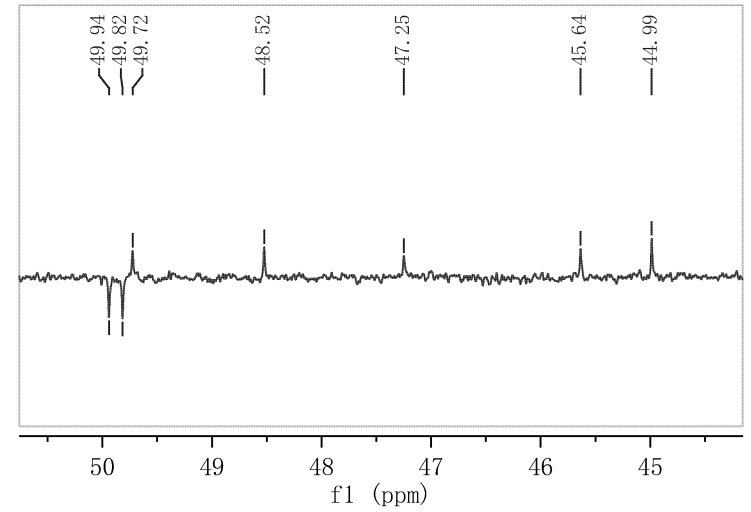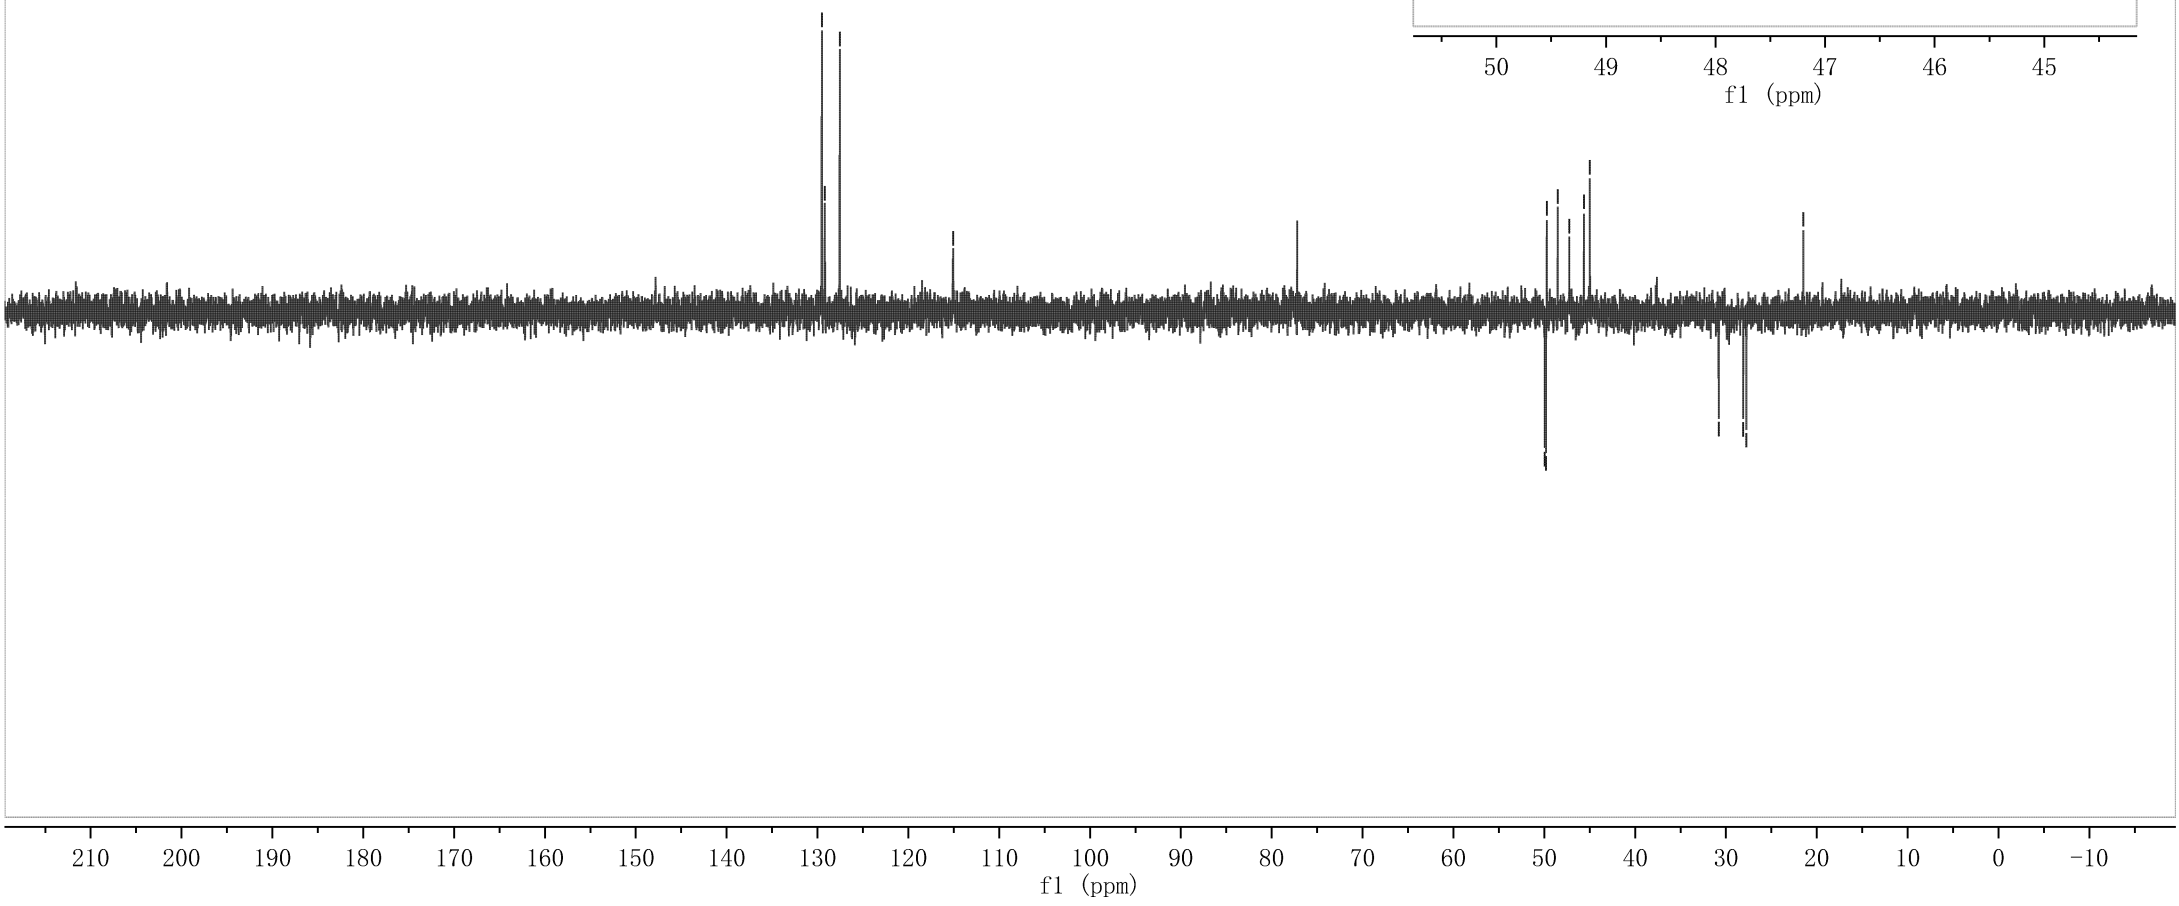

| Parameter                | Value               |
|--------------------------|---------------------|
| 1 Title                  | ZXQ-22-6            |
| 2 Origin                 | Bruker BioSpin GmbH |
| 3 Solvent                | CDC13               |
| 4 Temperature            | 298.0               |
| 5 Number of Scans        | 4                   |
| 6 Acquisition Time       | 4.0894              |
| 7 Acquisition Date       | 2020-08-14T16:56:10 |
| 8 Spectrometer Frequency | 400.13              |
| 9 Spectral Width         | 8012.8              |

7.757  
7.736  
7.463  
7.441  
7.274  
7.257  
7.252  
7.237  
7.088  
7.066  
7.053  
7.050  
6.971  
6.971  
6.967  
6.953  
6.949  
6.932

3.831  
3.569  
3.550  
3.535  
2.740  
2.728  
2.718  
2.706  
2.696  
2.683  
2.675  
2.662  
2.662  
2.441  
2.420  
2.402  
2.365  
2.227  
2.212  
2.199  
2.190  
2.178  
2.167  
2.157  
2.134  
2.049  
2.049  
1.034  
1.021  
1.013  
1.001

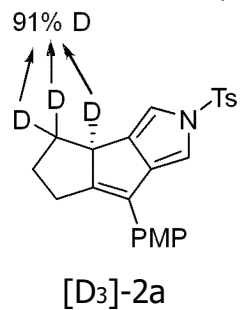

1.95  
1.84  
2.36  
1.01  
2.80

3.00  
0.09  
0.94  
1.06  
2.95  
1.87  
0.09  
0.09

8.5 8.0 7.5 7.0 6.5 6.0 5.5 5.0 4.5 4.0 3.5 3.0 2.5 2.0 1.5 1.0 0.5 0.0 -0.

f1 (ppm)

| Parameter                | Value               |
|--------------------------|---------------------|
| 1 Title                  | ZXQ-22-6-C          |
| 2 Origin                 | Bruker BioSpin GmbH |
| 3 Solvent                | CDC13               |
| 4 Temperature            | 300.0               |
| 5 Number of Scans        | 35                  |
| 6 Acquisition Time       | 1.3631              |
| 7 Acquisition Date       | 2020-08-14T16:57:13 |
| 8 Spectrometer Frequency | 100.61              |
| 9 Spectral Width         | 24038.5             |

158.66 157.77 144.40 141.55 136.48 134.90 129.79 128.43 127.43 126.67 113.88 113.25 107.76 77.32 77.00 76.68 55.28 29.37 24.97 21.52

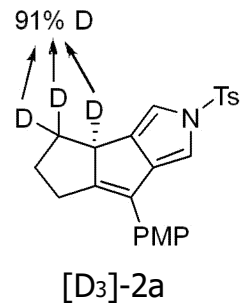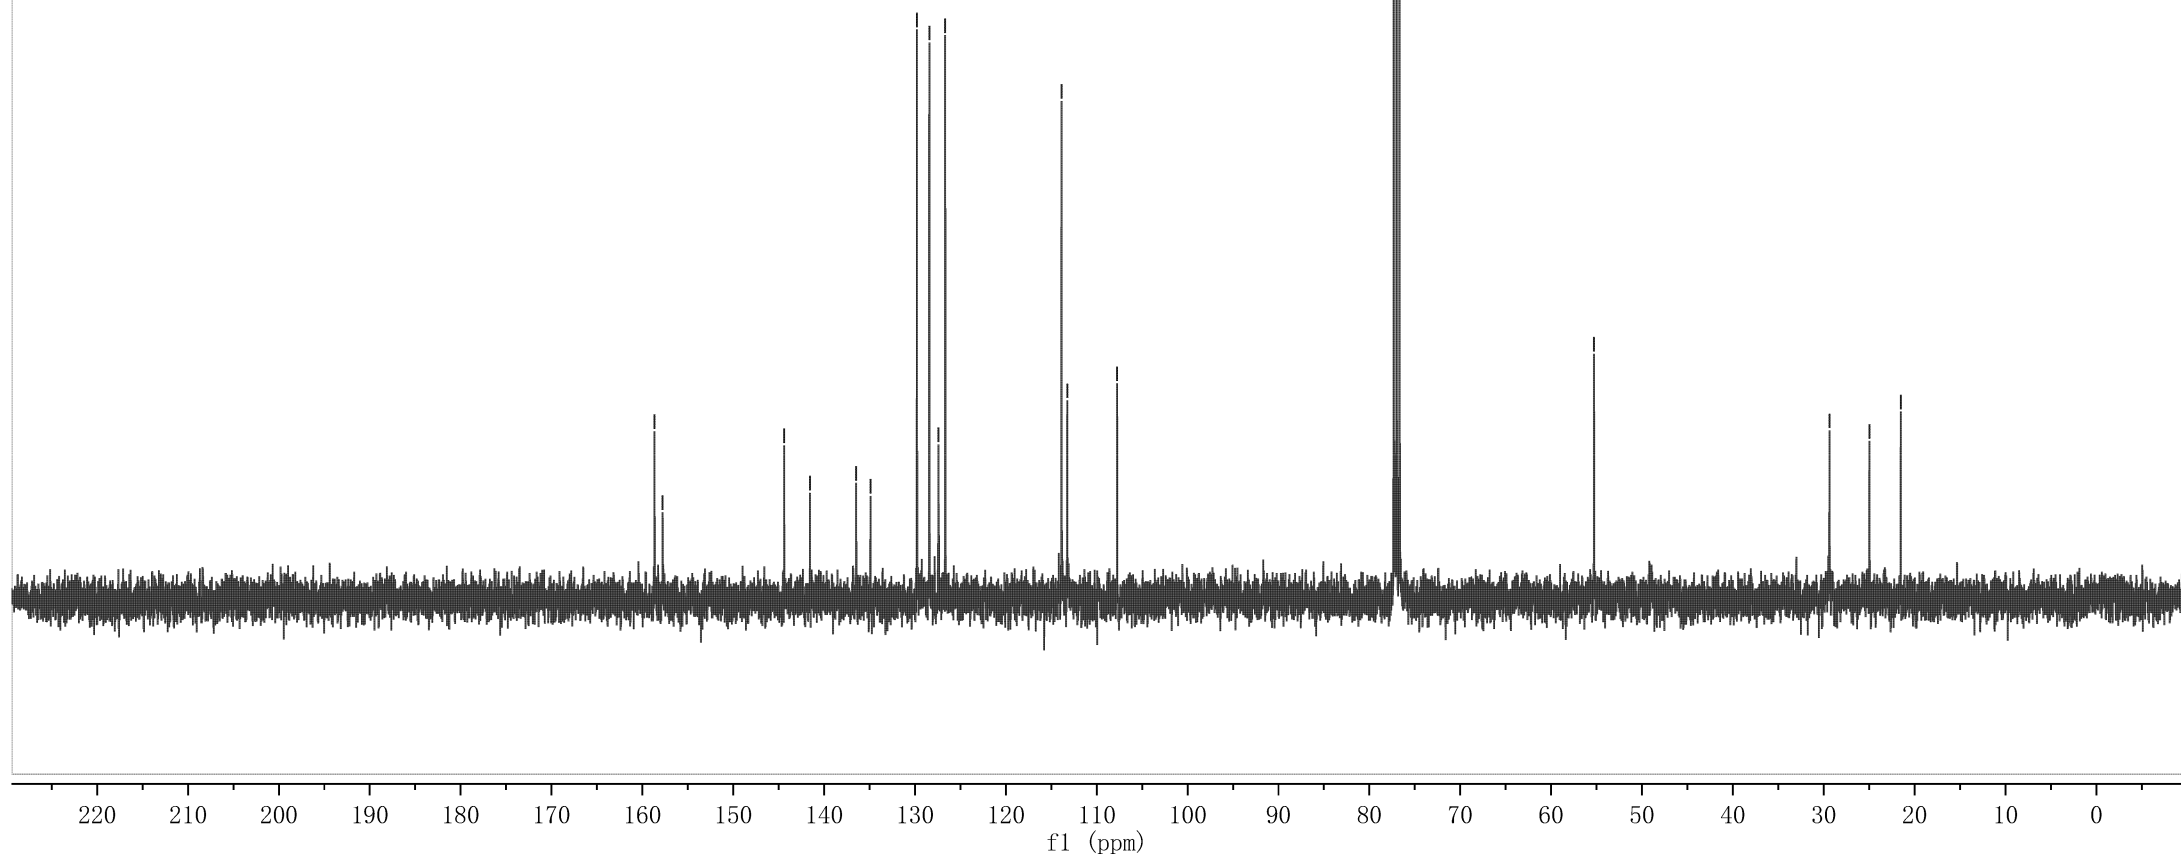

| Parameter                | Value               |
|--------------------------|---------------------|
| 1 Title                  | ZXQ-22-14-1-D20-    |
| 2 Origin                 | Bruker BioSpin GmbH |
| 3 Solvent                | CDC13               |
| 4 Temperature            | 301.6               |
| 5 Number of Scans        | 9                   |
| 6 Acquisition Time       | 3.9846              |
| 7 Acquisition Date       | 2020-08-17T21:55:22 |
| 8 Spectrometer Frequency | 400.03              |
| 9 Spectral Width         | 8223.7              |

7.756  
7.752  
7.739  
7.735  
7.464  
7.459  
7.447  
7.442  
7.263  
7.257  
7.243  
7.047  
7.041  
6.973  
6.969  
6.966  
6.962  
6.955  
6.950  
6.938  
6.933

3.838  
3.595  
3.576  
3.564  
3.546  
2.749  
2.731  
2.717  
2.704  
2.689  
2.673  
2.430  
2.409  
2.374  
2.221  
2.215  
2.209  
2.201  
2.194  
2.184  
2.164  
2.088  
1.072  
1.052  
1.048  
1.043  
1.022

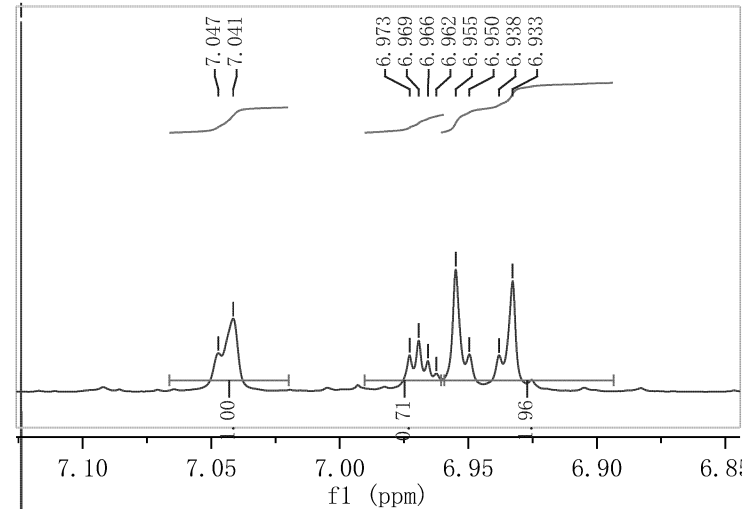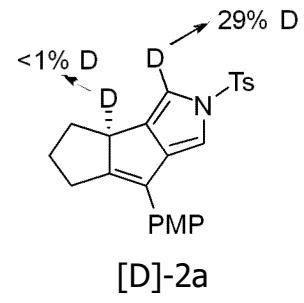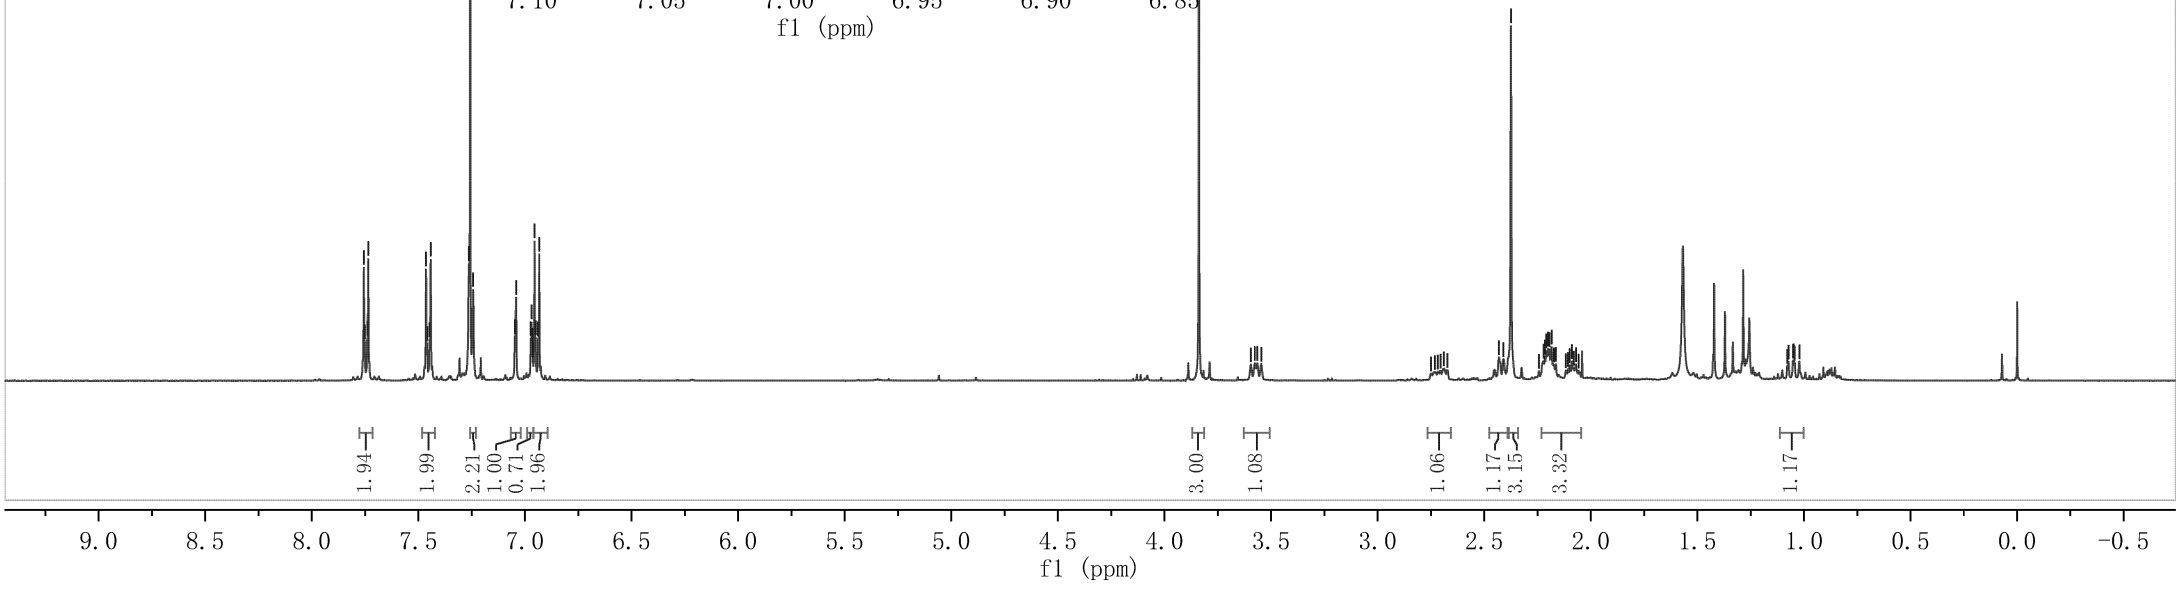

7.757  
7.736  
7.464  
7.442  
7.256  
7.241  
7.047  
6.971  
6.955  
6.933

3.835  
3.592  
3.573  
3.562  
3.543  
2.747  
2.729  
2.714  
2.703  
2.686  
2.671  
2.447  
2.426  
2.406  
2.370  
2.205  
2.197  
2.181  
2.114  
2.096  
2.085  
2.068  
2.054  
1.069  
1.045  
1.018  
0.989

| Parameter                | Value               |
|--------------------------|---------------------|
| 1 Title                  | ZXQ-22-14-2-MeOD    |
| 2 Origin                 | Bruker BioSpin GmbH |
| 3 Solvent                | CDC13               |
| 4 Temperature            | 299.2               |
| 5 Number of Scans        | 7                   |
| 6 Acquisition Time       | 3.9846              |
| 7 Acquisition Date       | 2020-08-15T20:41:37 |
| 8 Spectrometer Frequency | 400.03              |
| 9 Spectral Width         | 8223.7              |

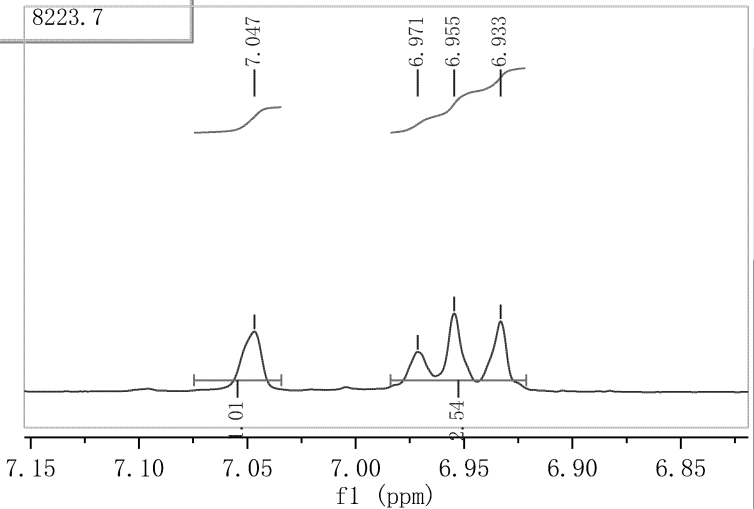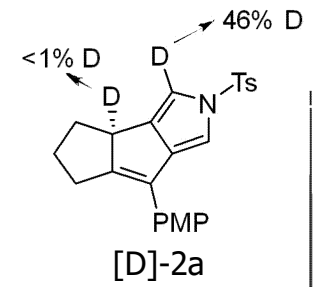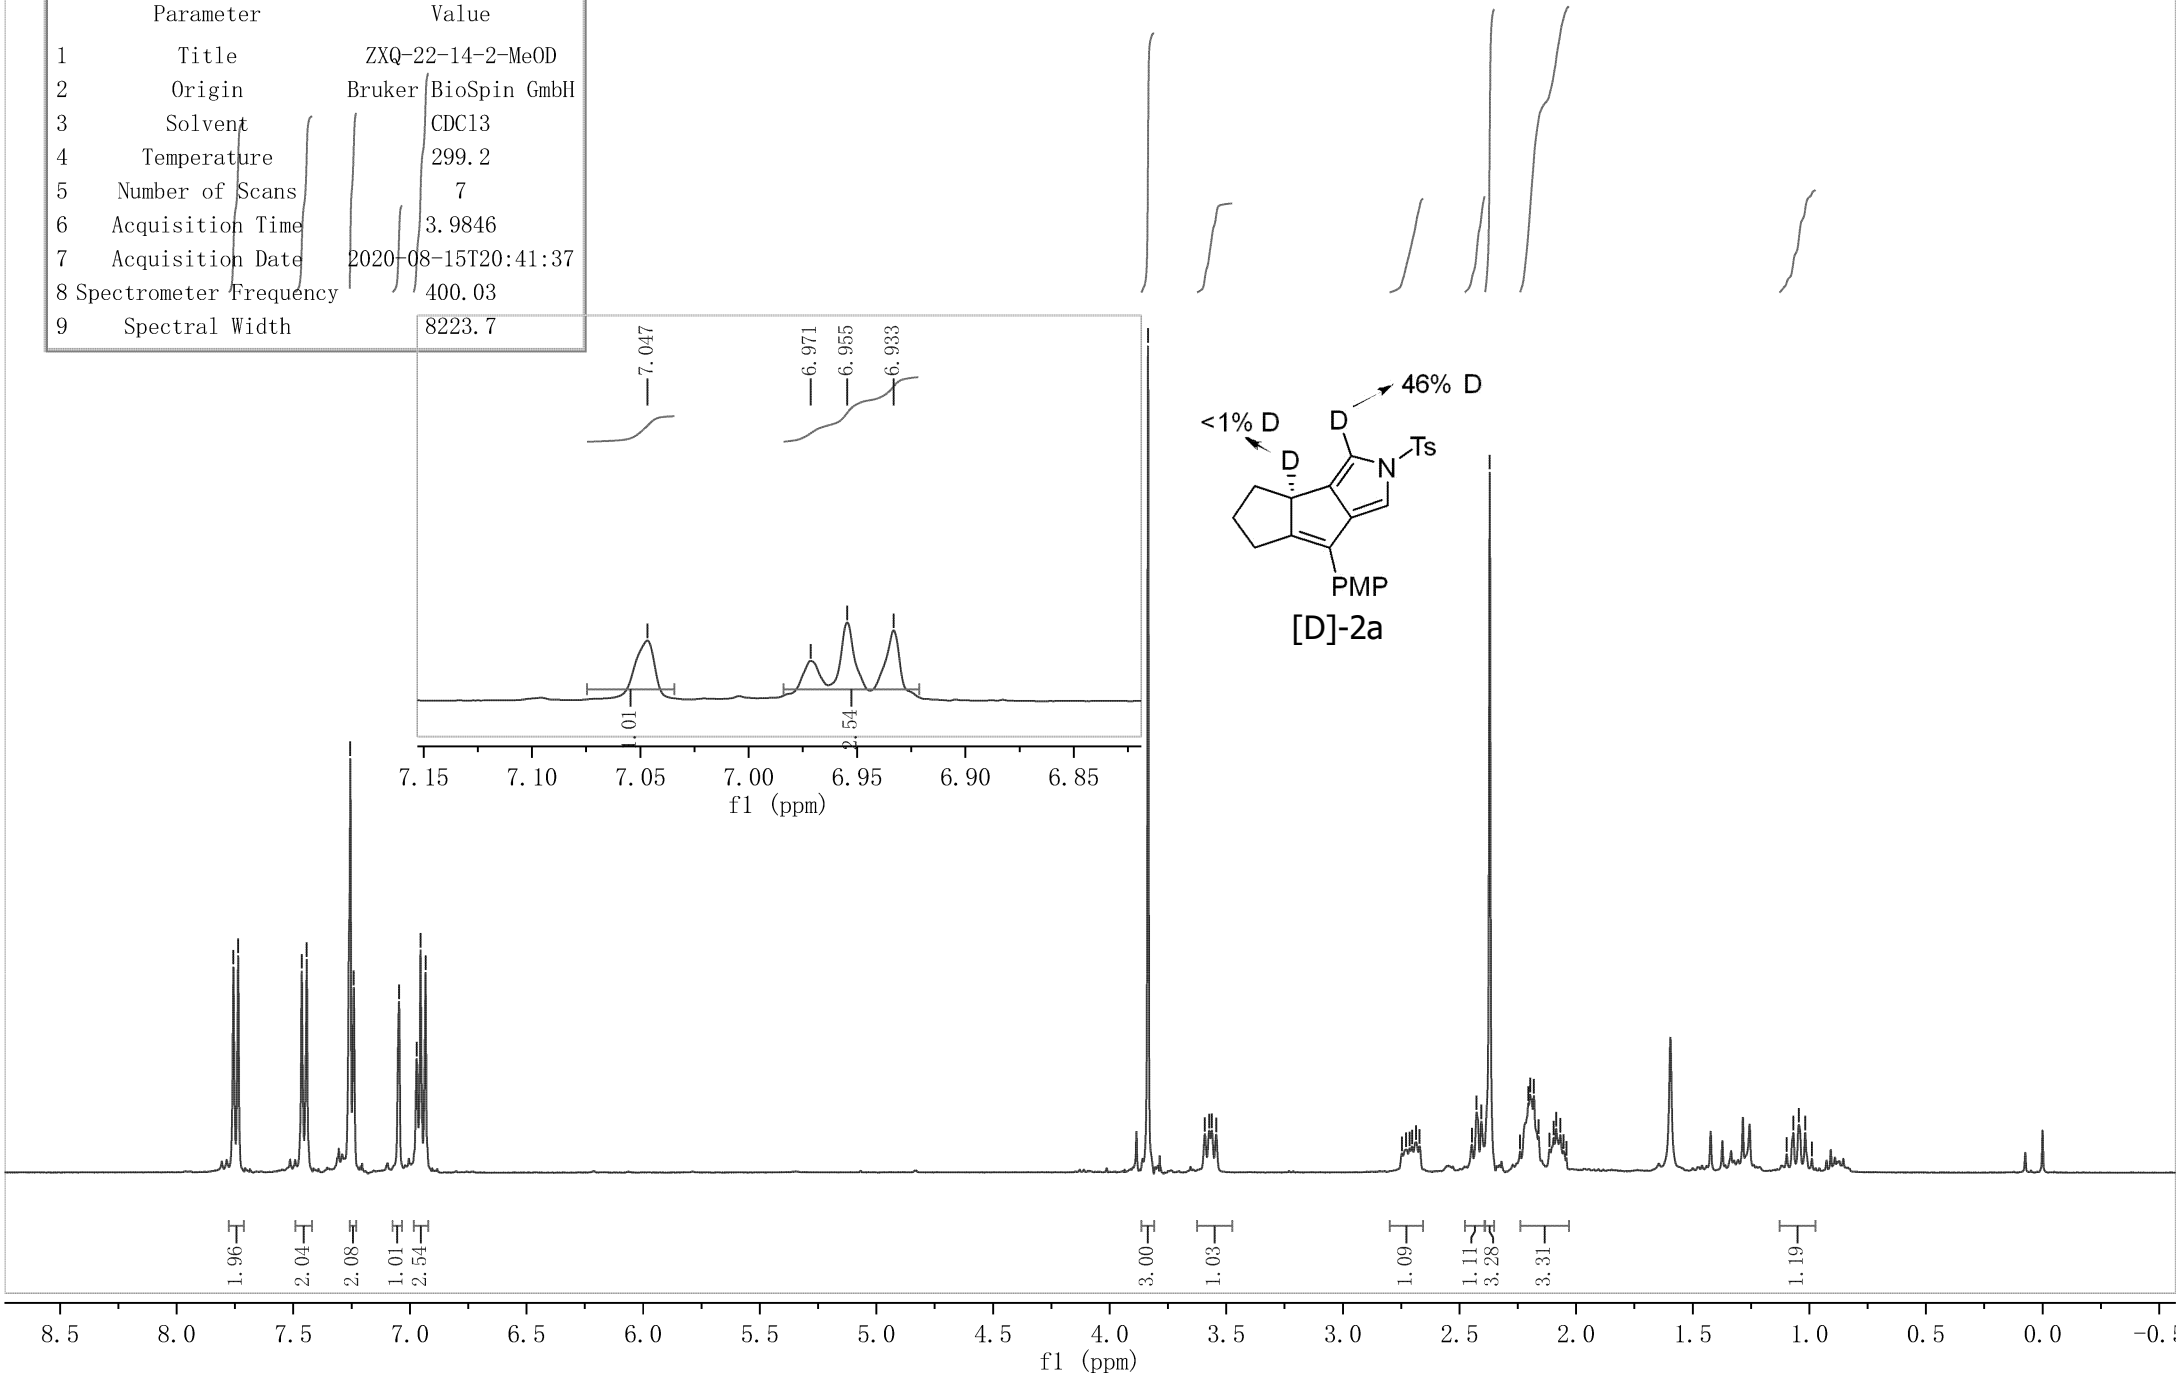

| Parameter                | Value               |
|--------------------------|---------------------|
| 1 Title                  | ZXQ-23-192          |
| 2 Origin                 | Bruker BioSpin GmbH |
| 3 Solvent                | CDCl3               |
| 4 Temperature            | 298.4               |
| 5 Number of Scans        | 13                  |
| 6 Acquisition Time       | 3.1719              |
| 7 Acquisition Date       | 2020-12-25T16:54:12 |
| 8 Spectrometer Frequency | 500.17              |
| 9 Spectral Width         | 10330.6             |

7.755  
7.738  
7.460  
7.447  
7.443  
7.252  
6.969  
6.966  
6.957  
6.951  
6.947  
6.938  
6.934

3.830  
3.582  
3.567  
3.560  
3.544  
2.708  
2.698  
2.690  
2.686  
2.682  
2.674  
2.418  
2.401  
2.384  
2.363  
2.208  
2.198  
2.193  
2.189  
2.185  
2.178  
1.082  
1.058  
1.041  
1.035  
1.018  
1.012  
0.995

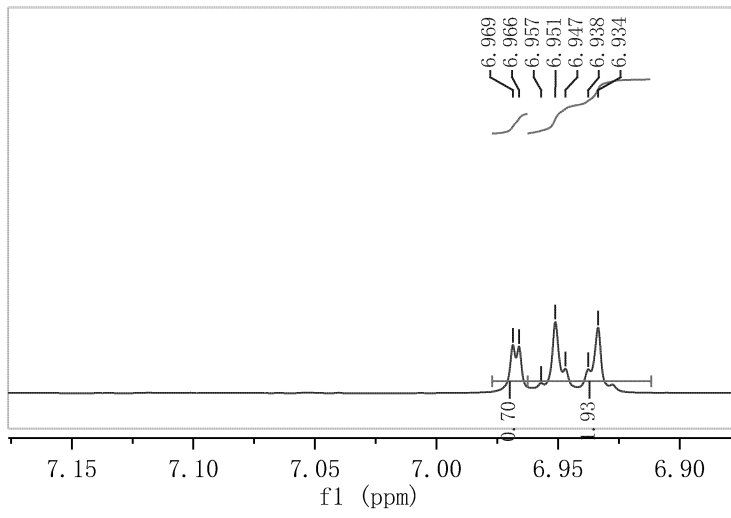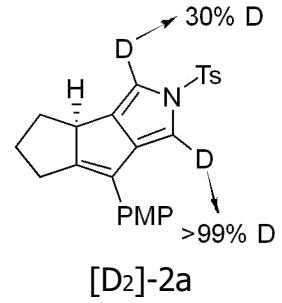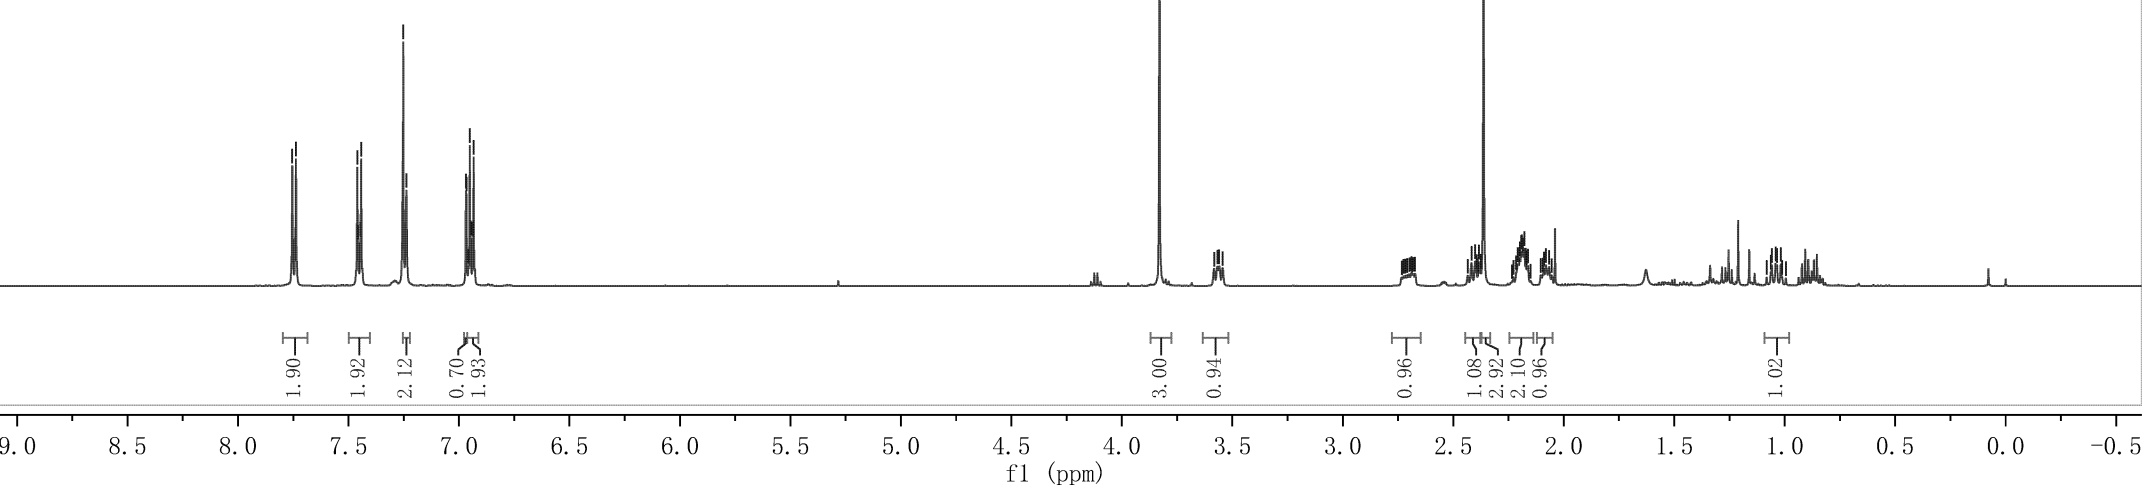

7.756  
7.739  
7.463  
7.445  
7.263  
7.259  
7.247  
6.968  
6.965  
6.955  
6.951  
6.941  
6.937  
6.932

3.840  
3.590  
3.575  
3.575  
3.568  
3.552  
2.742  
2.734  
2.726  
2.718  
2.708  
2.699  
2.683  
2.426  
2.409  
2.392  
2.376  
2.218  
2.208  
2.203  
2.200  
2.196  
2.188  
2.182  
2.084  
2.080  
1.067  
1.050  
1.044  
1.026  
1.021  
1.003  
0.999

| Parameter                | Value               |
|--------------------------|---------------------|
| 1 Title                  | ZXQ-23-182          |
| 2 Origin                 | Bruker BioSpin GmbH |
| 3 Solvent                | CDCl3               |
| 4 Temperature            | 298.0               |
| 5 Number of Scans        | 8                   |
| 6 Acquisition Time       | 3.1719              |
| 7 Acquisition Date       | 2020-12-23T17:15:44 |
| 8 Spectrometer Frequency | 500.17              |
| 9 Spectral Width         | 10330.6             |

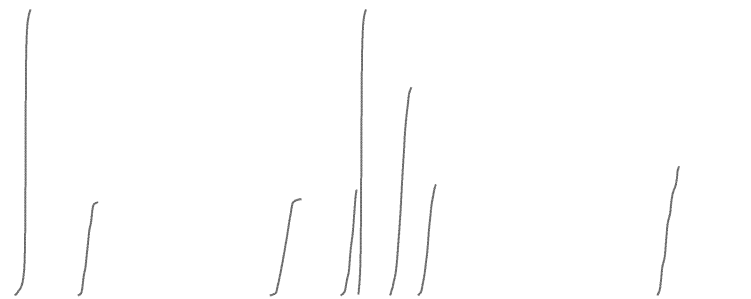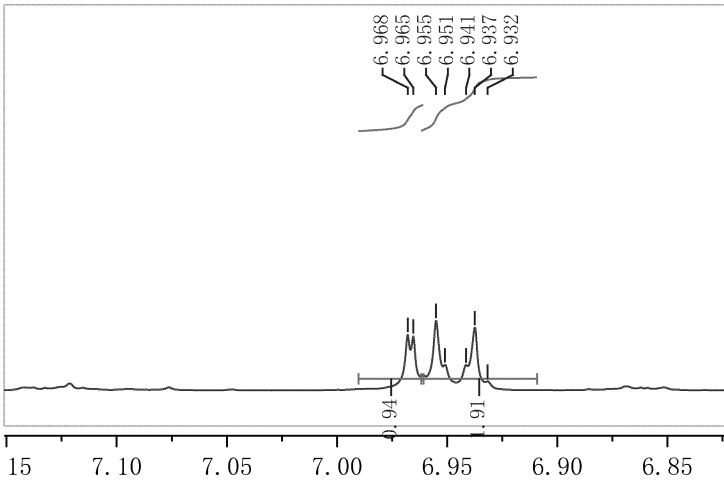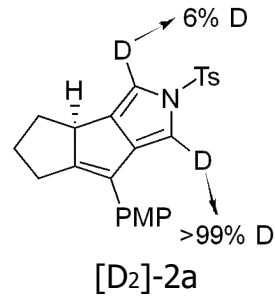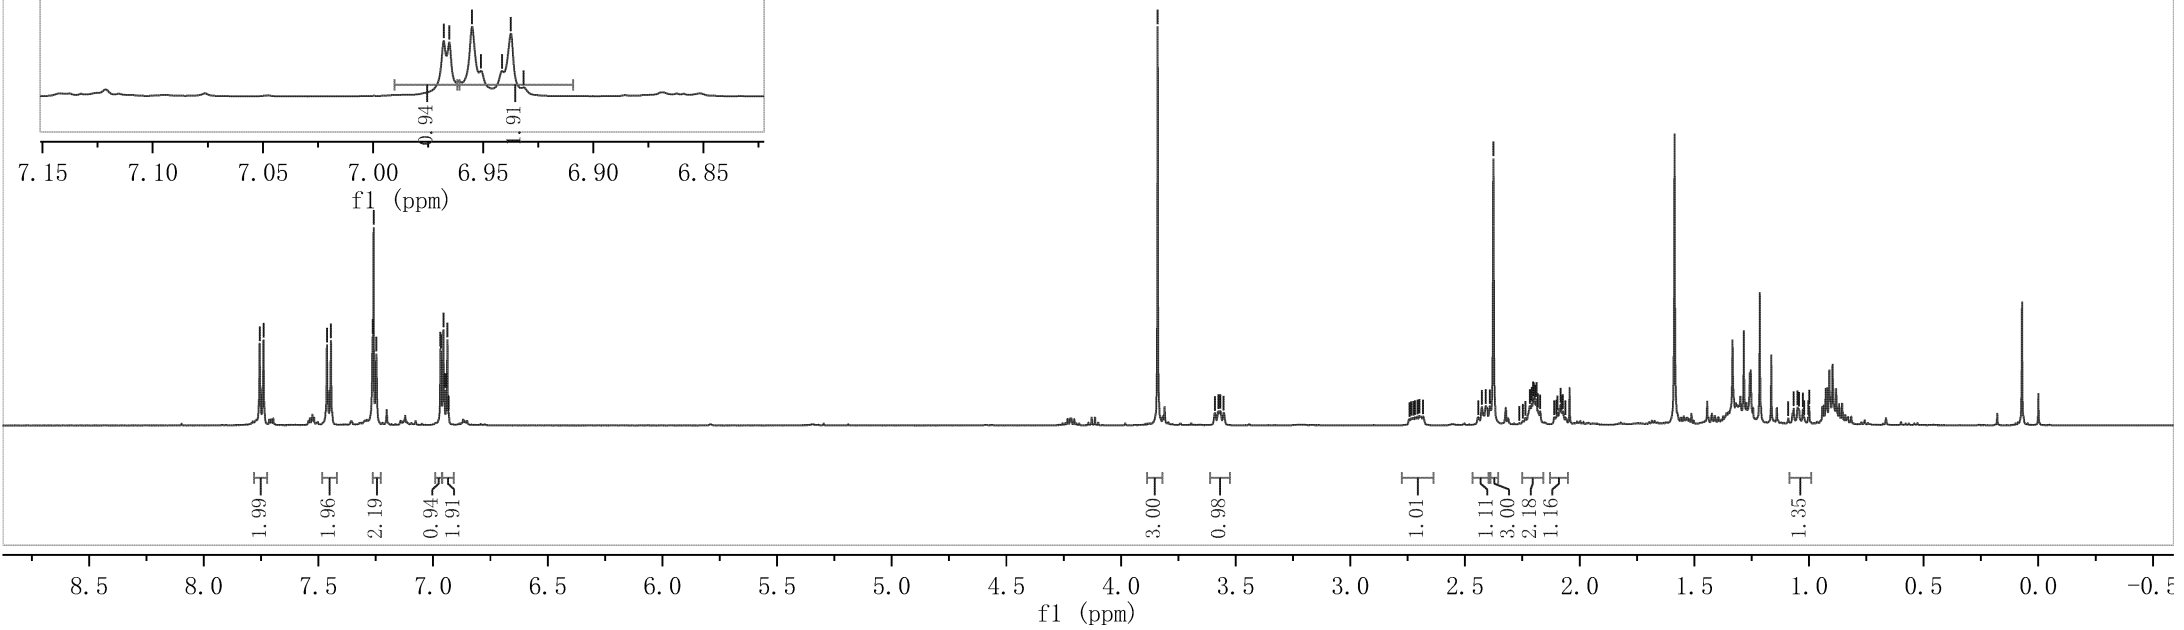

7.851  
7.833  
7.830  
7.790  
7.769  
7.615  
7.612  
7.609  
7.594  
7.578  
7.575  
7.572  
7.490  
7.471  
7.456  
7.452  
7.405  
7.399  
7.341  
7.321  
7.282  
7.133  
7.127

6.070  
6.065  
6.060

2.572  
2.567  
2.554  
2.549  
2.540  
2.535  
2.530  
2.462  
2.432  
2.415  
2.409  
2.404  
2.390  
2.385  
1.940  
1.921  
1.913  
1.903  
1.893  
1.884  
1.865

| Parameter                | Value               |
|--------------------------|---------------------|
| 1 Title                  | ZXQ-22-24           |
| 2 Origin                 | Bruker BioSpin GmbH |
| 3 Solvent                | CDC13               |
| 4 Temperature            | 298.0               |
| 5 Number of Scans        | 5                   |
| 6 Acquisition Time       | 4.0894              |
| 7 Acquisition Date       | 2020-08-20T11:39:56 |
| 8 Spectrometer Frequency | 400.13              |
| 9 Spectral Width         | 8012.8              |

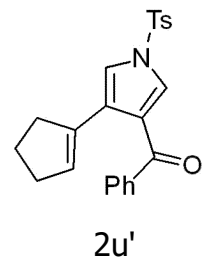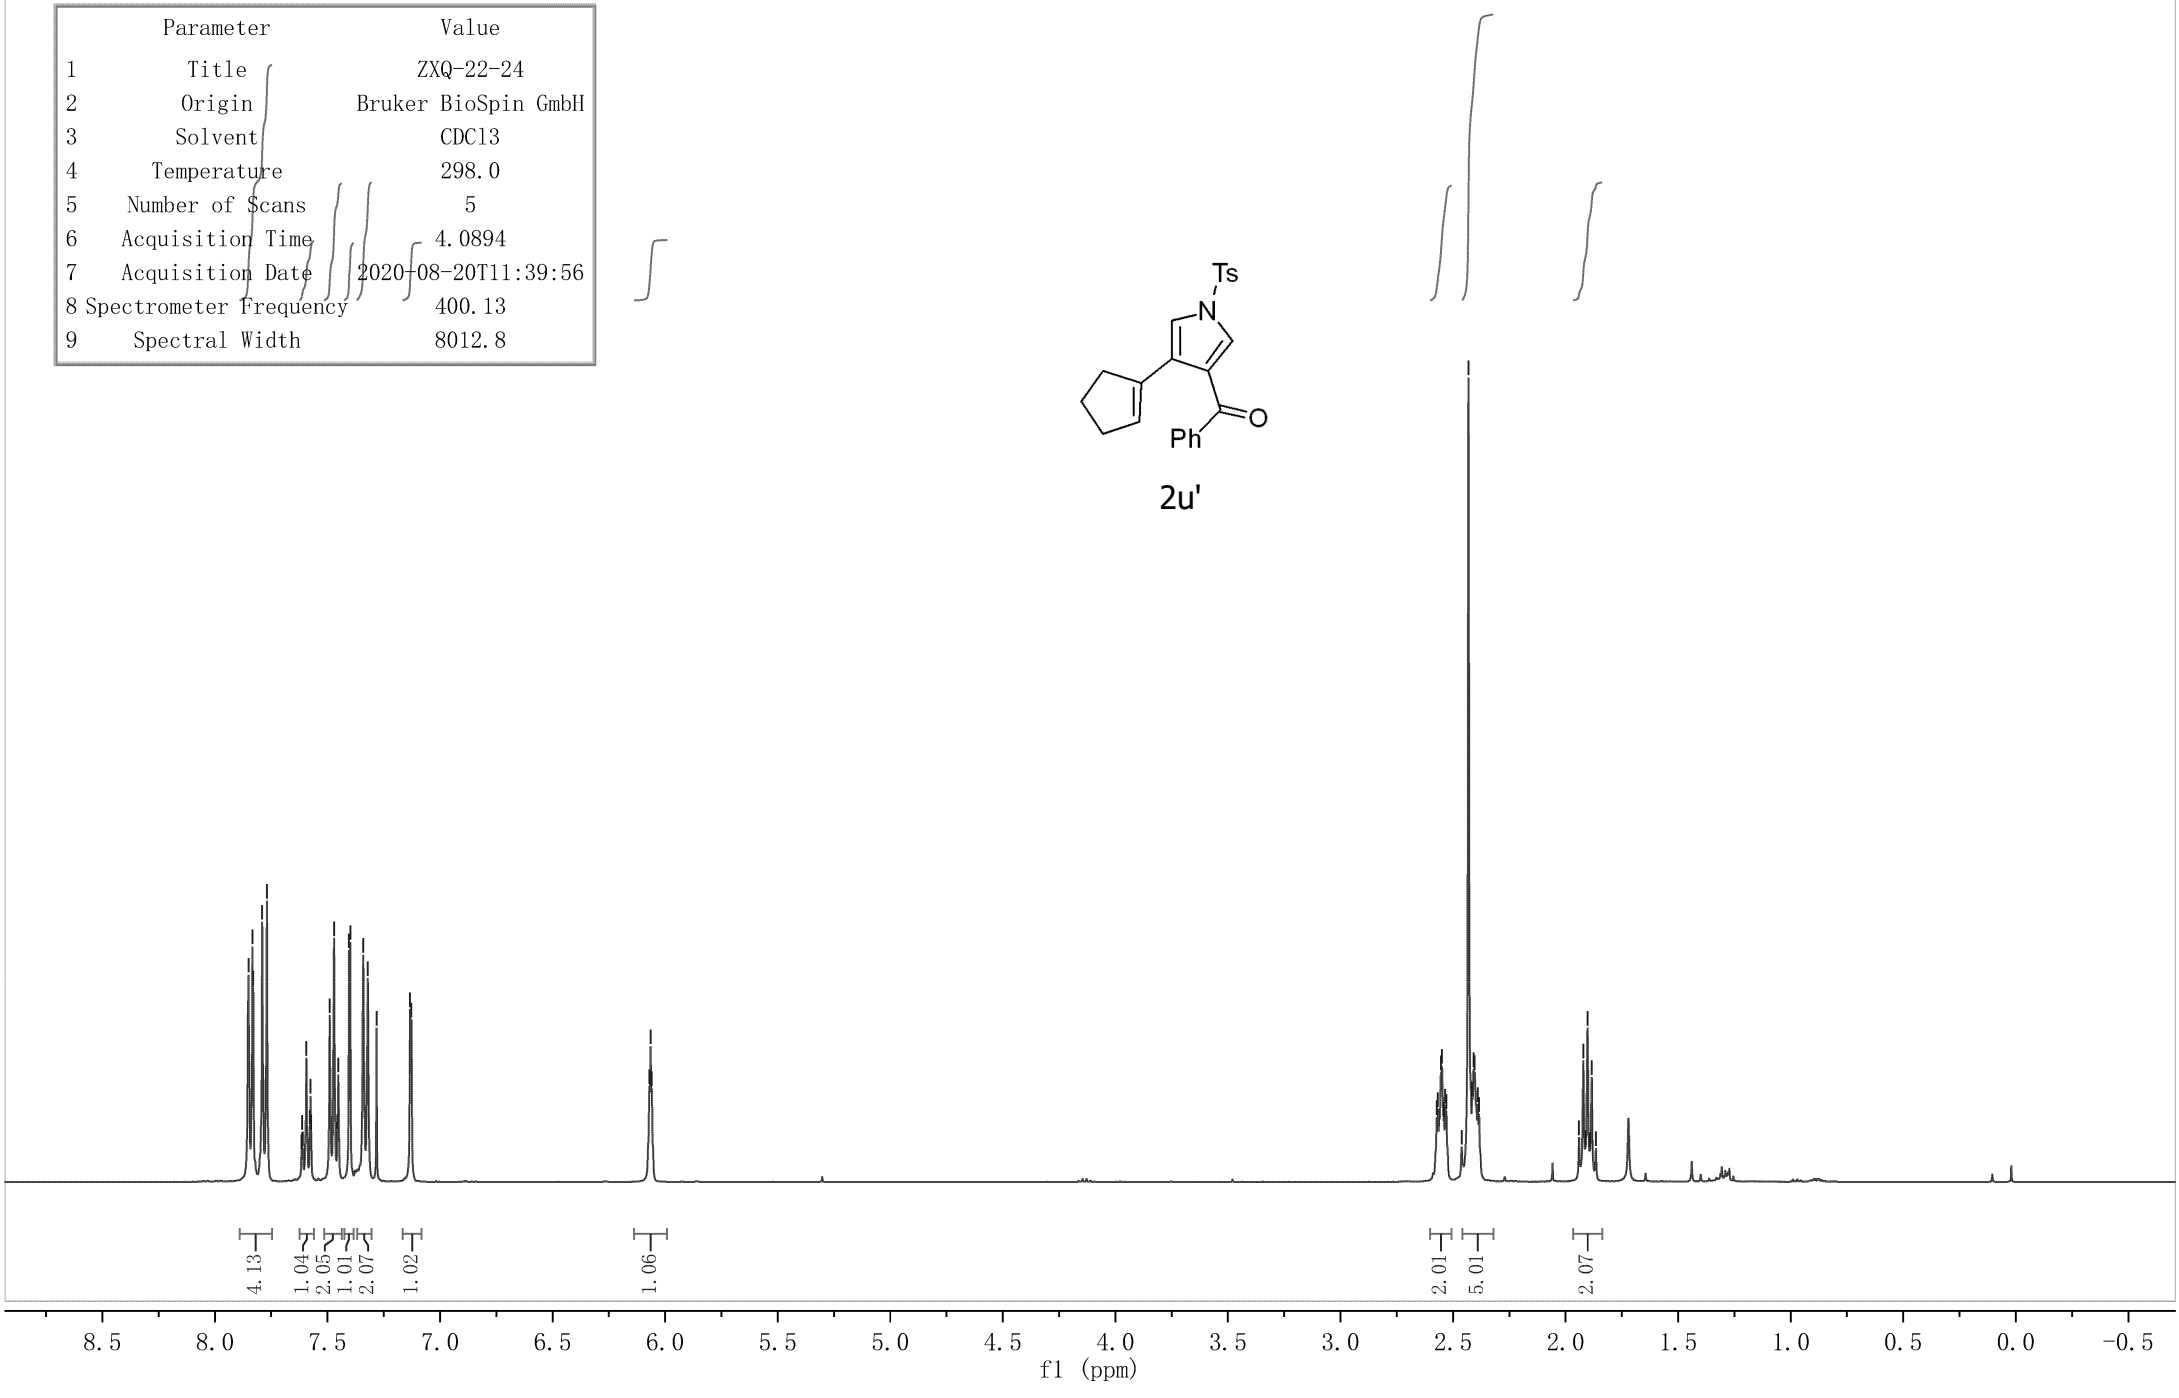



| Parameter                | Value               |
|--------------------------|---------------------|
| 1 Title                  | ZXQ-22-24-C         |
| 2 Origin                 | Bruker BioSpin GmbH |
| 3 Solvent                | CDC13               |
| 4 Temperature            | 300.0               |
| 5 Number of Scans        | 9                   |
| 6 Acquisition Time       | 1.3631              |
| 7 Acquisition Date       | 2020-08-20T11:41:10 |
| 8 Spectrometer Frequency | 100.61              |
| 9 Spectral Width         | 24038.5             |

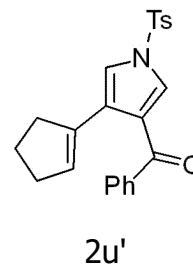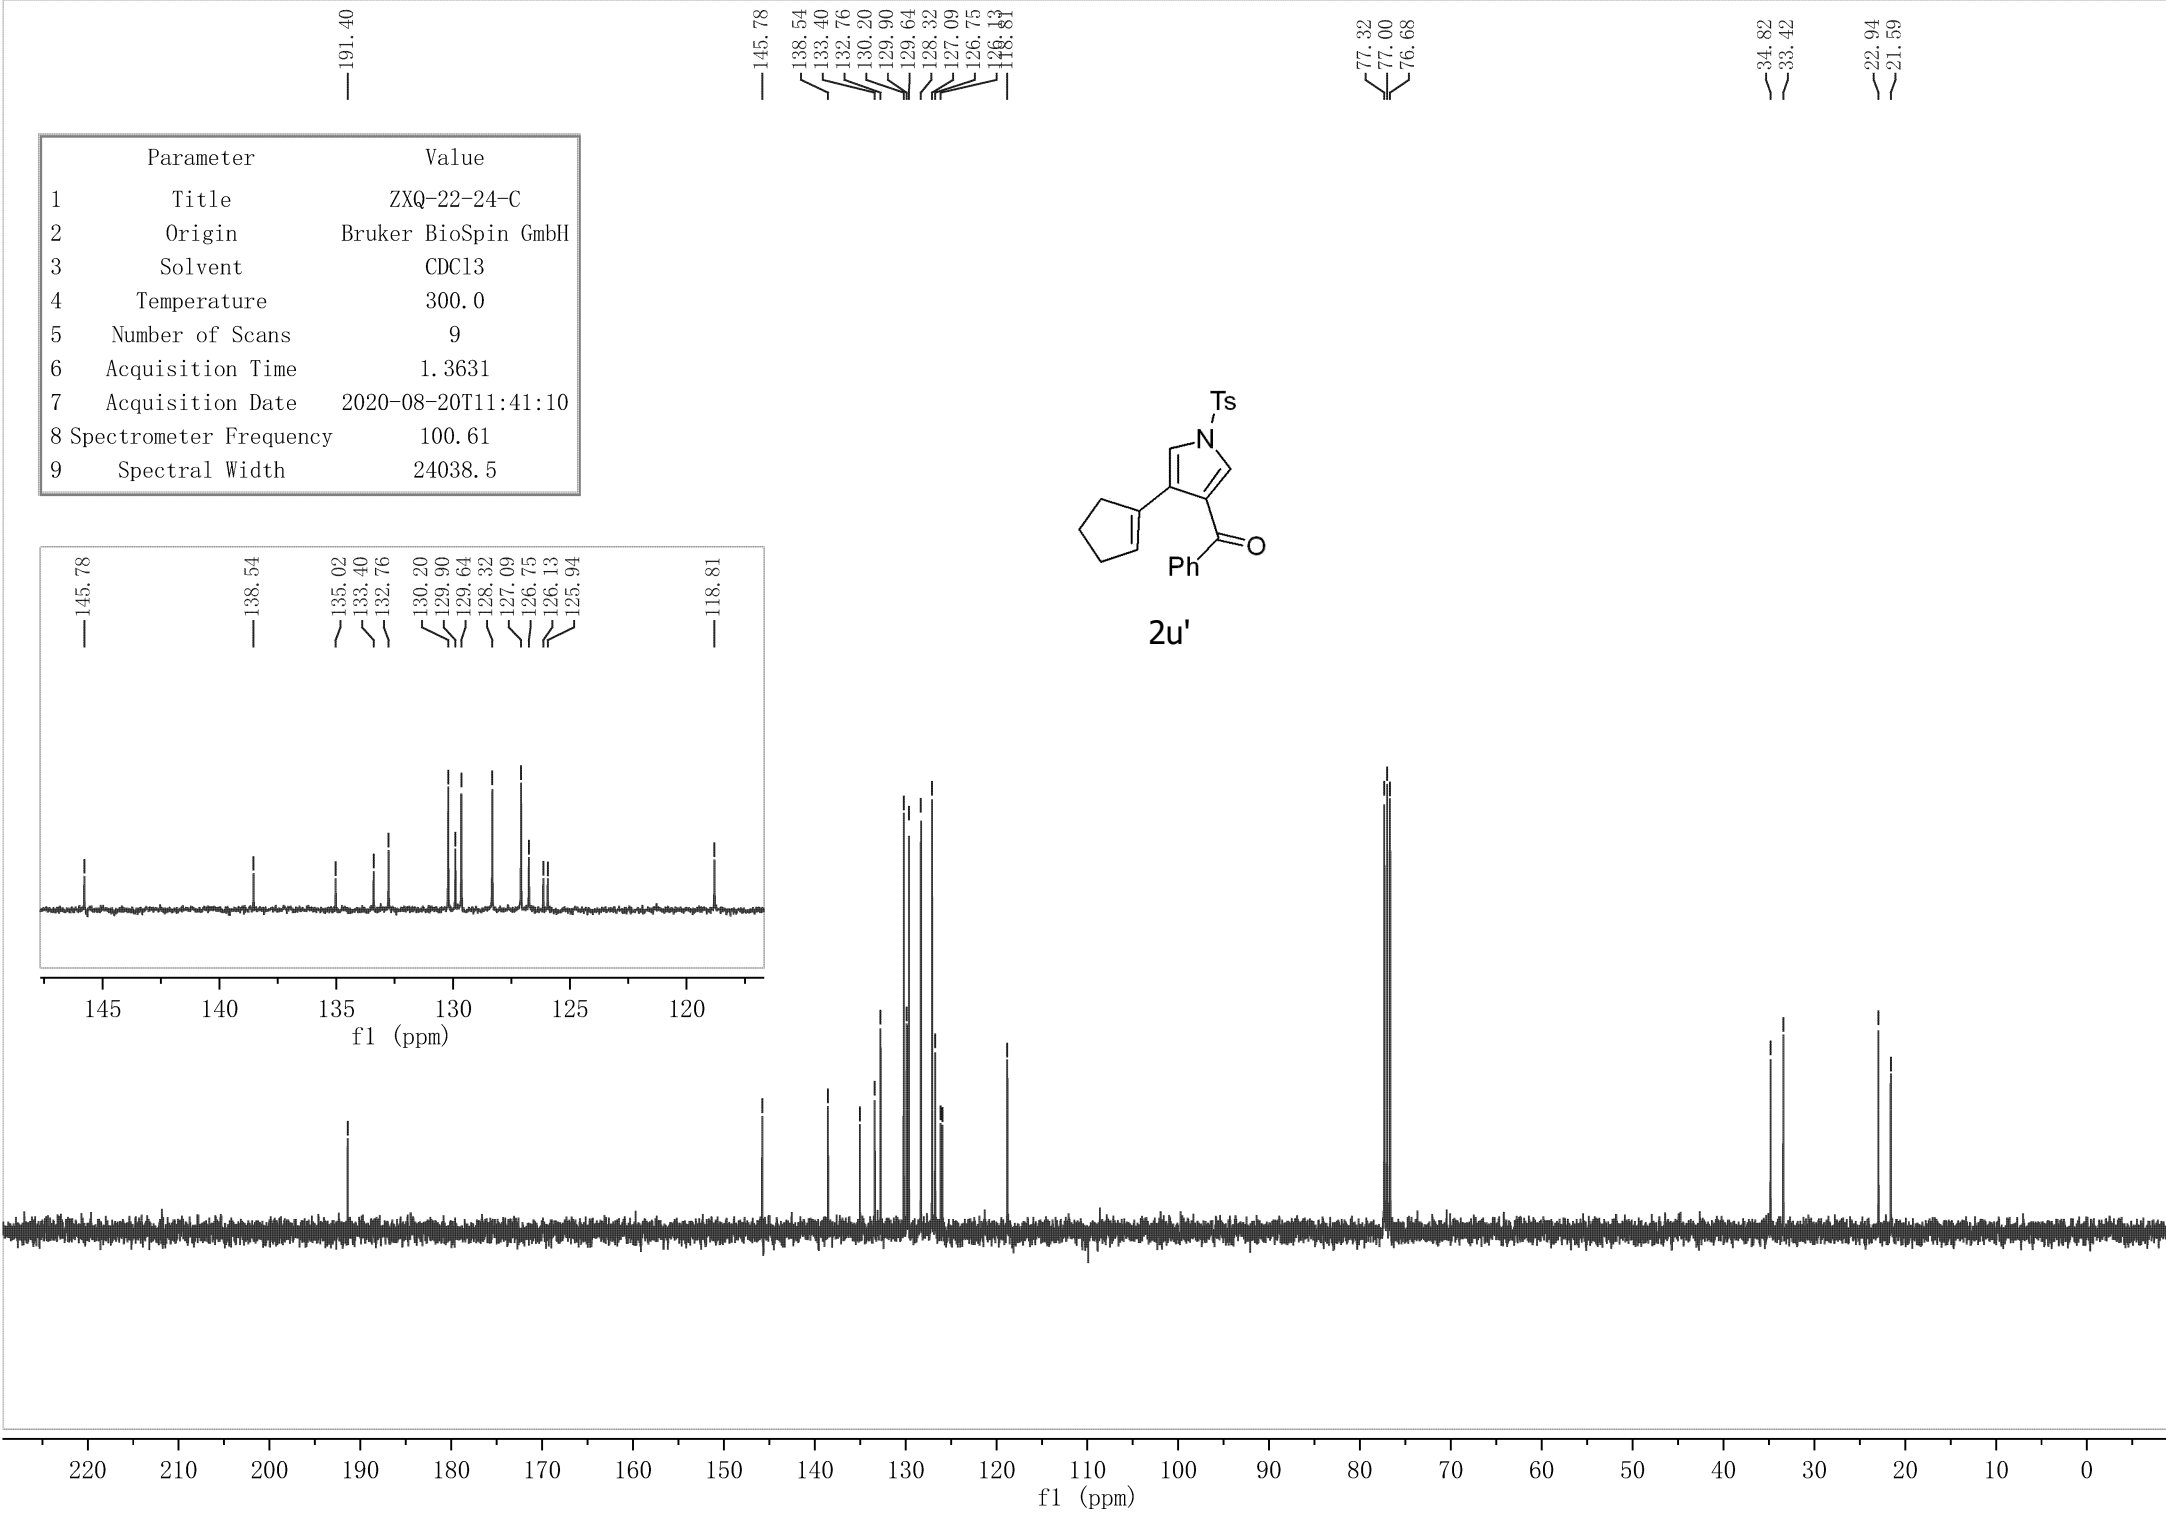

| Parameter                | Value               |
|--------------------------|---------------------|
| 1 Title                  | ZXQ-22-24-C-DEPT    |
| 2 Origin                 | Bruker BioSpin GmbH |
| 3 Solvent                | CDC13               |
| 4 Temperature            | 300.0               |
| 5 Number of Scans        | 7                   |
| 6 Acquisition Time       | 1.3631              |
| 7 Acquisition Date       | 2020-08-20T11:42:14 |
| 8 Spectrometer Frequency | 100.61              |
| 9 Spectral Width         | 24038.5             |

132.76  
130.21  
129.90  
129.65  
128.32  
127.09  
126.75  
118.81

34.82  
33.42  
22.95  
21.59

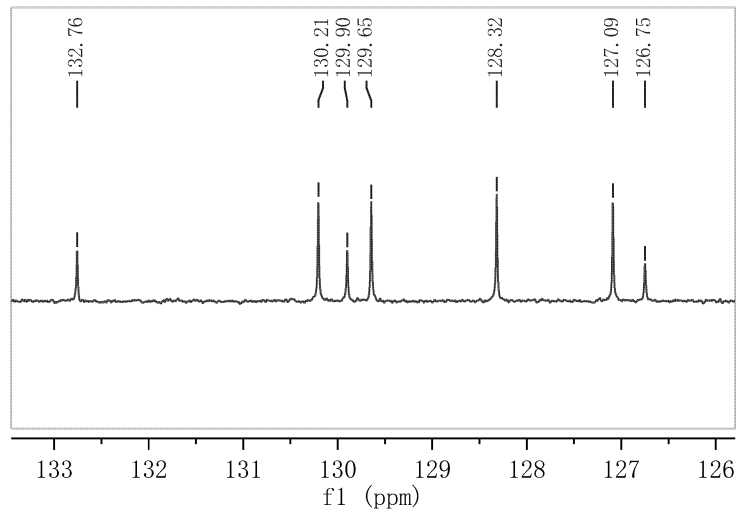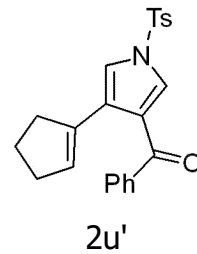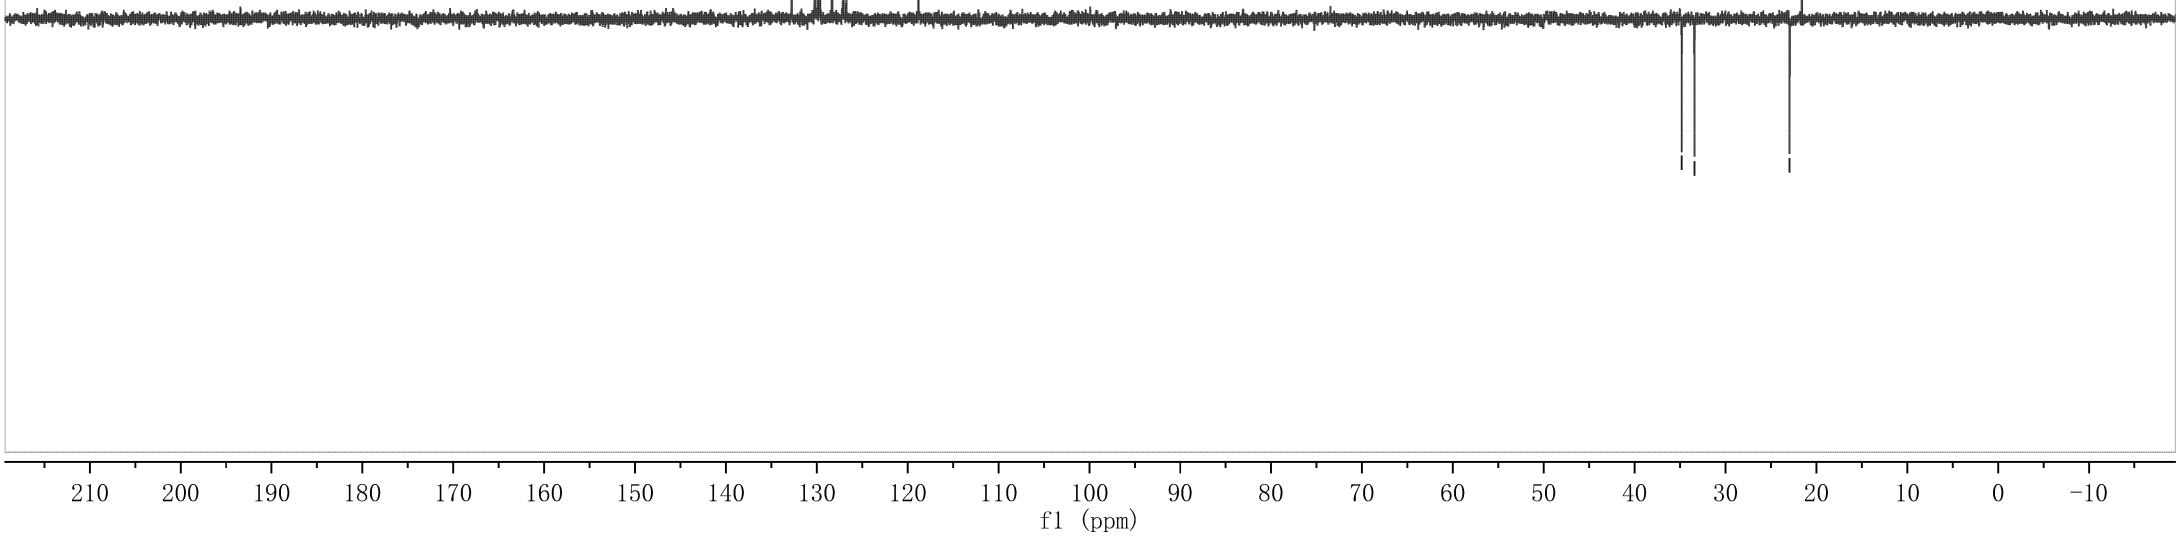

7.756  
7.740  
7.463  
7.450  
7.446  
7.200  
7.248  
7.047  
6.974  
6.971  
6.961  
6.955  
6.951  
6.942  
6.937  
6.932

3.841  
3.590  
3.575  
3.565  
3.553  
3.553  
2.731  
2.722  
2.712  
2.705  
2.705  
2.695  
2.687  
2.442  
2.425  
2.408  
2.403  
2.389  
2.377  
2.218  
2.203  
2.196  
2.189  
2.178  
2.169  
1.091  
1.072  
1.067  
1.050  
1.044  
1.027  
1.004

| Parameter                | Value               |
|--------------------------|---------------------|
| 1 Title                  | ZXQ-22-130-1        |
| 2 Origin                 | Bruker BioSpin GmbH |
| 3 Solvent                | CDC13               |
| 4 Temperature            | 297.8               |
| 5 Number of Scans        | 7                   |
| 6 Acquisition Time       | 3.1719              |
| 7 Acquisition Date       | 2020-09-18T20:52:45 |
| 8 Spectrometer Frequency | 500.17              |
| 9 Spectral Width         | 10330.6             |

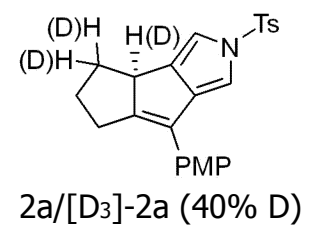

1.93  
1.99  
2.00  
3.92

3.00  
0.60  
1.03  
1.03  
3.20  
2.23  
0.60

0.60

40% D  
40% D  
40% D

8.5 8.0 7.5 7.0 6.5 6.0 5.5 5.0 4.5 4.0 3.5 3.0 2.5 2.0 1.5 1.0 0.5 0.0 -0.5  
f1 (ppm)

| Parameter                | Value               |
|--------------------------|---------------------|
| 1 Title                  | ZXQ-24-75           |
| 2 Origin                 | Bruker BioSpin GmbH |
| 3 Solvent                | CDC13               |
| 4 Temperature            | 298.5               |
| 5 Number of Scans        | 9                   |
| 6 Acquisition Time       | 3.1719              |
| 7 Acquisition Date       | 2021-03-10T16:52:27 |
| 8 Spectrometer Frequency | 500.17              |
| 9 Spectral Width         | 10330.6             |

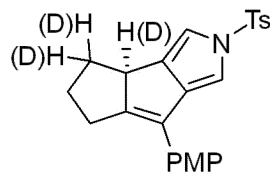

2a/[D<sub>3</sub>]-2a (41% D)

7.758  
7.741  
7.465  
7.448  
7.262  
7.250  
7.050  
7.048  
6.975  
6.972  
6.963  
6.957  
6.953  
6.943  
6.939  
6.933

3.843  
3.592  
3.577  
3.568  
3.555  
2.742  
2.732  
2.723  
2.714  
2.707  
2.697  
2.689  
2.427  
2.410  
2.405  
2.391  
2.379  
2.220  
2.205  
2.198  
2.190  
2.180  
2.174  
1.893  
1.074  
1.069  
1.053  
1.046  
1.029  
1.006

1.95  
2.01  
2.10  
4.00

2.97  
0.59  
0.99  
0.97  
3.01  
2.24  
0.59

0.59

41% D

41% D

41% D

8.5 8.0 7.5 7.0 6.5 6.0 5.5 5.0 4.5 4.0 3.5 3.0 2.5 2.0 1.5 1.0 0.5 0.0 -0.5  
f1 (ppm)
